# Supplementary material for: Effects of Prenatal Exposure to Titanium Dioxide Nanoparticles on DNA Methylation and Gene Expression Profile in the Mouse Brain
Source: PubMed Central journal article supplement (PMC8915839; doi:10.3389/ftox.2021.705910), 2021-10-08
Supplement: Table7.pdf [file Table7.pdf]

**Supplementary Table 7. The genes of which DNA methylation were decreased in the brain of female offspring prenatally exposed to TiO<sub>2</sub>-NP.**

| ProbeName      | Target position of probe on CpG island microarray | TargetID           | GeneSymbol    | CpG island Description | Ratio of relative methylation (TiO <sub>2</sub> -NP/Vehicle) | Sham group                       |                     |                     | TiO <sub>2</sub> -H group        |                     |                     |
|----------------|---------------------------------------------------|--------------------|---------------|------------------------|--------------------------------------------------------------|----------------------------------|---------------------|---------------------|----------------------------------|---------------------|---------------------|
|                |                                                   |                    |               |                        |                                                              | Relative methylation (Cy-5/Cy-3) | Cy-3 signal (Input) | Cy-5 signal (MeDIP) | Relative methylation (Cy-5/Cy-3) | Cy-3 signal (Input) | Cy-5 signal (MeDIP) |
| A_68_P31102483 | chr17:25377069-25377113                           | NM_001163718:-24   | 0610007P22Rik | DIVERGENT_PROMOTER     | 0.275                                                        | 0.365                            | 1564.68             | 570.88              | 0.100                            | 1276.81             | 127.95              |
| A_68_P27795275 | chr11:51502704-51502761                           | NM_025319:-596     | 0610009B22Rik | PROMOTER               | 0.255                                                        | 0.349                            | 1652.35             | 576.76              | 0.089                            | 1336.07             | 119.14              |
| A_68_P28202484 | chr12:4824078-4824122                             | NM_025323:-313     | 0610009D07Rik | PROMOTER               | 0.406                                                        | 0.608                            | 1944.10             | 1181.96             | 0.247                            | 1603.98             | 395.49              |
| A_68_P28183969 | chr11:120210906-120210950                         | NR_038126:937      | 0610009L18Rik | INSIDE                 | 0.221                                                        | 0.653                            | 1539.12             | 1004.95             | 0.145                            | 1088.27             | 157.27              |
| A_68_P27646750 | chr11:23533697-23533742                           | NM_027860:-88      | 0610010F05Rik | PROMOTER               | 0.439                                                        | 0.620                            | 1612.47             | 1000.42             | 0.272                            | 1363.85             | 371.50              |
| A_68_P27899662 | chr11:70051263-70051307                           | NM_001177601:132   | 0610010K14Rik | INSIDE                 | 0.238                                                        | 0.356                            | 1752.37             | 623.05              | 0.085                            | 1486.63             | 125.86              |
| A_68_P31623418 | chr18:36508869-36508913                           | NM_001081365:613   | 0610010O12Rik | INSIDE                 | 0.420                                                        | 0.560                            | 1256.22             | 703.63              | 0.235                            | 1148.09             | 270.04              |
| A_68_P24541217 | chr6:72297432-72297476                            | NM_026696:144      | 0610030E20Rik | INSIDE                 | 0.473                                                        | 0.544                            | 1173.35             | 638.12              | 0.257                            | 961.45              | 247.19              |
| A_68_P24541218 | chr6:72297585-72297629                            | NM_026696:296      | 0610030E20Rik | INSIDE                 | 0.506                                                        | 0.640                            | 1200.57             | 768.92              | 0.324                            | 976.07              | 316.47              |
| A_68_P23747544 | chr5:64203539-64203583                            | NM_029554:-173     | 0610040J01Rik | PROMOTER               | 0.407                                                        | 0.325                            | 2198.01             | 714.47              | 0.132                            | 1814.50             | 239.97              |
| A_68_P24377801 | chr6:38484955-38484999                            | NM_025363:116      | 1110001J03Rik | INSIDE                 | 0.560                                                        | 0.622                            | 1455.55             | 905.08              | 0.348                            | 1209.77             | 421.18              |
| A_68_P28448909 | chr12:55757202-55757246                           | NM_134054:335      | 1110002B05Rik | INSIDE                 | 0.588                                                        | 0.474                            | 2137.50             | 1012.68             | 0.279                            | 1647.80             | 459.13              |
| A_68_P28448910 | chr12:55757351-55757395                           | NM_134054:187      | 1110002B05Rik | INSIDE                 | 0.404                                                        | 0.509                            | 1885.11             | 959.65              | 0.206                            | 1424.62             | 293.29              |
| A_68_P23756658 | chr5:65883543-65883594                            | NM_133697:506      | 1110003E01Rik | INSIDE                 | 0.082                                                        | 1.376                            | 1428.44             | 1965.72             | 0.113                            | 1055.44             | 119.46              |
| A_68_P23756666 | chr5:65884517-65884566                            | NM_133697:-467     | 1110003E01Rik | PROMOTER               | 0.062                                                        | 1.900                            | 2135.45             | 4057.75             | 0.119                            | 1475.15             | 175.18              |
| A_68_P30959868 | chr16:90934441-90934485                           | NM_026502:632      | 1110004E09Rik | INSIDE                 | 0.102                                                        | 1.625                            | 2187.27             | 3554.32             | 0.166                            | 1532.00             | 254.74              |
| A_68_P30959870 | chr16:90934584-90934628                           | NM_026502:488      | 1110004E09Rik | INSIDE                 | 0.197                                                        | 1.493                            | 5615.36             | 8385.98             | 0.294                            | 3441.60             | 1013.47             |
| A_68_P30959877 | chr16:90935364-90935408                           | NM_026502:-292     | 1110004E09Rik | PROMOTER               | 0.549                                                        | 0.655                            | 975.44              | 638.67              | 0.359                            | 806.84              | 289.87              |
| A_68_P24010682 | chr5:116081413-116081457                          | NR_027810:391      | 1110006O24Rik | INSIDE                 | 0.465                                                        | 0.585                            | 1981.41             | 1158.76             | 0.272                            | 1367.20             | 372.10              |
| A_68_P24010683 | chr5:116081567-116081611                          | NR_027810:237      | 1110006O24Rik | INSIDE                 | 0.543                                                        | 0.480                            | 3967.39             | 1902.82             | 0.261                            | 3024.88             | 788.20              |
| A_68_P24039804 | chr5:121062475-121062523                          | NM_029096:100      | 1110008J03Rik | INSIDE                 | 0.262                                                        | 0.569                            | 1261.98             | 717.52              | 0.149                            | 882.62              | 131.63              |
| A_68_P24039806 | chr5:121062707-121062753                          | NM_029096:-132     | 1110008J03Rik | DIVERGENT_PROMOTER     | 0.173                                                        | 0.605                            | 1671.34             | 1011.87             | 0.104                            | 1153.56             | 120.49              |
| A_68_P24039807 | chr5:121062809-121062858                          | NM_029096:-235     | 1110008J03Rik | DIVERGENT_PROMOTER     | 0.085                                                        | 0.741                            | 2716.71             | 2012.92             | 0.063                            | 1912.35             | 120.62              |
| A_68_P21115063 | chr2:32237069-32237113                            | NM_198001:345      | 1110008P14Rik | INSIDE                 | 0.487                                                        | 0.635                            | 813.33              | 516.47              | 0.309                            | 625.13              | 193.40              |
| A_68_P21115067 | chr2:32237497-32237541                            | NM_198001:-83      | 1110008P14Rik | PROMOTER               | 0.474                                                        | 0.452                            | 3164.68             | 1431.07             | 0.215                            | 2248.98             | 482.49              |
| A_68_P31305849 | chr17:66729099-66729143                           | NM_001114098:69970 | 1110012J17Rik | INSIDE                 | 0.664                                                        | 2.326                            | 1921.71             | 4469.38             | 1.544                            | 1357.88             | 2095.95             |
| A_68_P22862527 | chr4:41454006-41454050                            | NM_028624:769      | 1110017D15Rik | INSIDE                 | 0.346                                                        | 0.574                            | 1866.88             | 1070.67             | 0.199                            | 1492.32             | 296.37              |
| A_68_P28601430 | chr12:86311556-86311600                           | NM_178065:258      | 1110018G07Rik | INSIDE                 | 0.141                                                        | 0.694                            | 2777.69             | 1926.56             | 0.098                            | 2013.51             | 197.55              |
| A_68_P30003953 | chr15:9000818-9000866                             | NM_001040395:-166  | 1110020G09Rik | PROMOTER               | 0.283                                                        | 0.592                            | 1047.71             | 620.19              | 0.167                            | 721.25              | 120.70              |
| A_68_P30003954 | chr15:9000908-9000952                             | NM_001040395:-78   | 1110020G09Rik | PROMOTER               | 0.298                                                        | 0.579                            | 2192.77             | 1270.55             | 0.173                            | 1518.52             | 262.25              |
| A_68_P31129446 | chr17:29853826-29853870                           | NM_001163741:114   | 1110021J02Rik | INSIDE                 | 0.241                                                        | 1.895                            | 2742.01             | 5195.22             | 0.457                            | 1743.70             | 797.18              |
| A_68_P31129448 | chr17:29854041-29854085                           | NM_001163741:-100  | 1110021J02Rik | PROMOTER               | 0.167                                                        | 1.646                            | 4708.75             | 7749.57             | 0.275                            | 3153.45             | 868.55              |
| A_68_P20304762 | chr1:66863250-66863306                            | NM_001122738:891   | 1110028C15Rik | INSIDE                 | 0.253                                                        | 0.432                            | 1501.38             | 648.86              | 0.109                            | 1084.27             | 118.50              |
| A_68_P20304765 | chr1:66863691-66863735                            | NM_001122738:457   | 1110028C15Rik | INSIDE                 | 0.631                                                        | 0.632                            | 979.39              | 619.21              | 0.399                            | 800.69              | 319.66              |
| A_68_P28189252 | chr11:121066090-121066134                         | NM_025402:-150     | 1110031I02Rik | DIVERGENT_PROMOTER     | 0.448                                                        | 0.729                            | 3435.64             | 2503.65             | 0.326                            | 2421.51             | 789.79              |
| A_68_P28189253 | chr11:121066168-121066212                         | NM_025402:-228     | 1110031I02Rik | DIVERGENT_PROMOTER     | 0.647                                                        | 0.674                            | 2836.41             | 1911.52             | 0.436                            | 2309.43             | 1007.33             |
| A_68_P22217911 | chr3:68673203-68673247                            | NM_001167996:-283  | 1110032F04Rik | PROMOTER               | 0.603                                                        | 0.508                            | 1114.32             | 566.44              | 0.306                            | 941.56              | 288.50              |
| A_68_P20252951 | chr1:57463816-57463860                            | NM_001037742:-320  | 1110034B05Rik | PROMOTER               | 0.284                                                        | 0.480                            | 1330.48             | 639.27              | 0.137                            | 1073.59             | 146.60              |
| A_68_P27256916 | chr10:74980191-74980235                           | NM_175133:-145     | 1110038D17Rik | DIVERGENT_PROMOTER     | 0.610                                                        | 0.716                            | 1785.62             | 1279.09             | 0.437                            | 1457.66             | 637.16              |
| A_68_P30351330 | chr15:76779157-76779201                           | NM_054099:205      | 1110038F14Rik | INSIDE                 | 0.618                                                        | 0.466                            | 1212.67             | 565.59              | 0.288                            | 1047.35             | 301.82              |
| A_68_P30351332 | chr15:76779347-76779391                           | NM_054099:395      | 1110038F14Rik | INSIDE                 | 0.575                                                        | 0.453                            | 1546.39             | 700.56              | 0.261                            | 1351.00             | 352.07              |
| A_68_P23331579 | chr4:135543347-135543391                          | NM_025411:-209     | 1110049F12Rik | PROMOTER               | 0.559                                                        | 0.640                            | 1505.82             | 963.38              | 0.358                            | 1300.10             | 465.03              |

| ProbeName      | Target position of probe on CpG island microarray | TargetID          | GeneSymbol    | CpG island Description | Ratio of relative methylation (TiO2-NP/Vehicle) | Sham group                       |                     |                     | TiO <sub>2</sub> -H group        |                     |                     |
|----------------|---------------------------------------------------|-------------------|---------------|------------------------|-------------------------------------------------|----------------------------------|---------------------|---------------------|----------------------------------|---------------------|---------------------|
|                |                                                   |                   |               |                        |                                                 | Relative methylation (Cy-5/Cy-3) | Cy-3 signal (Input) | Cy-5 signal (MeDIP) | Relative methylation (Cy-5/Cy-3) | Cy-3 signal (Input) | Cy-5 signal (MeDIP) |
| A_68_P22958317 | chr4:59796668-59796712                            | NM_001013577:37   | 1110054O05Rik | INSIDE                 | 0.275                                           | 0.528                            | 5380.06             | 2838.36             | 0.145                            | 4209.44             | 611.65              |
| A_68_P32007549 | chr19:21727415-21727459                           | NM_025423:-155    | 1110059E24Rik | DIVERGENT_PROMOTER     | 0.387                                           | 0.465                            | 1153.75             | 536.60              | 0.180                            | 781.26              | 140.74              |
| A_68_P26892246 | chr9:122859846-122859890                          | NM_025419:250     | 1110059G10Rik | INSIDE                 | 0.339                                           | 0.569                            | 2083.75             | 1185.89             | 0.193                            | 1729.49             | 333.35              |
| A_68_P26892247 | chr9:122859927-122859971                          | NM_025419:170     | 1110059G10Rik | INSIDE                 | 0.614                                           | 0.597                            | 1193.62             | 712.33              | 0.366                            | 952.22              | 348.99              |
| A_68_P26892248 | chr9:122860010-122860061                          | NM_025419:83      | 1110059G10Rik | INSIDE                 | 0.129                                           | 0.610                            | 2098.94             | 1280.17             | 0.078                            | 1497.80             | 117.56              |
| A_68_P27633580 | chr11:20731422-20731466                           | NM_173752:-333    | 1110067D22Rik | PROMOTER               | 0.286                                           | 0.403                            | 2112.75             | 851.46              | 0.115                            | 1634.76             | 188.73              |
| A_68_P24864290 | chr6:134877311-134877355                          | NR_037955:-1777   | 1190002F15Rik | PROMOTER               | 0.462                                           | 0.538                            | 992.32              | 533.45              | 0.248                            | 857.11              | 212.84              |
| A_68_P24864301 | chr6:134878457-134878501                          | NR_037955:-631    | 1190002F15Rik | PROMOTER               | 0.315                                           | 0.694                            | 1887.29             | 1309.59             | 0.219                            | 1288.40             | 281.77              |
| A_68_P29750655 | chr14:79700758-79700803                           | NM_025427:662     | 1190002H23Rik | INSIDE                 | 0.424                                           | 0.631                            | 2121.04             | 1338.95             | 0.267                            | 1624.80             | 434.42              |
| A_68_P29750659 | chr14:79701095-79701139                           | NM_025427:326     | 1190002H23Rik | INSIDE                 | 0.404                                           | 0.574                            | 1404.21             | 805.56              | 0.232                            | 1064.58             | 246.87              |
| A_68_P20714686 | chr1:153275868-153275912                          | NM_026876:113     | 1190005F20Rik | INSIDE                 | 0.454                                           | 0.485                            | 2219.62             | 1075.83             | 0.220                            | 1708.71             | 376.26              |
| A_68_P27292892 | chr10:82085954-82085998                           | NM_001135567:-3   | 1190007I07Rik | DIVERGENT_PROMOTER     | 0.568                                           | 0.611                            | 1061.20             | 648.32              | 0.347                            | 864.90              | 300.19              |
| A_68_P28743981 | chr12:112661620-112661664                         | NM_028807:6002    | 1200009I06Rik | INSIDE                 | 0.292                                           | 0.533                            | 994.97              | 530.58              | 0.156                            | 775.75              | 120.64              |
| A_68_P28744028 | chr12:112667836-112667880                         | NM_028807:12218   | 1200009I06Rik | INSIDE                 | 0.526                                           | 0.649                            | 1883.15             | 1222.35             | 0.341                            | 1429.66             | 488.04              |
| A_68_P27992494 | chr11:86900082-86900126                           | NM_024262:175     | 1200011M11Rik | INSIDE                 | 0.557                                           | 0.685                            | 3633.35             | 2489.28             | 0.381                            | 2646.03             | 1009.26             |
| A_68_P27992495 | chr11:86900155-86900199                           | NM_024262:103     | 1200011M11Rik | INSIDE                 | 0.213                                           | 0.674                            | 1512.21             | 1018.51             | 0.143                            | 1136.18             | 162.92              |
| A_68_P27921678 | chr11:74462698-74462742                           | NM_001081158:-276 | 1300001I01Rik | PROMOTER               | 0.226                                           | 0.460                            | 1396.56             | 643.09              | 0.104                            | 1256.78             | 130.76              |
| A_68_P22885561 | chr4:45896280-45896324                            | NM_028788:34484   | 1300002K09Rik | INSIDE                 | 0.518                                           | 3.420                            | 921.96              | 3153.51             | 1.773                            | 691.69              | 1226.57             |
| A_68_P27298723 | chr10:83185538-83185582                           | NM_001145198:-49  | 1500009L16Rik | PROMOTER               | 0.264                                           | 0.633                            | 3031.30             | 1917.79             | 0.167                            | 2286.84             | 382.04              |
| A_68_P31759410 | chr18:61886034-61886078                           | NR_029432:13      | 1500015A07Rik | INSIDE                 | 0.187                                           | 0.441                            | 1836.90             | 809.51              | 0.083                            | 1401.31             | 115.76              |
| A_68_P27977999 | chr11:84339401-84339452                           | NR_038057:265     | 1500016L03Rik | INSIDE                 | 0.148                                           | 0.520                            | 2271.78             | 1180.29             | 0.077                            | 1698.36             | 130.30              |
| A_68_P27978000 | chr11:84339607-84339651                           | NR_038057:467     | 1500016L03Rik | INSIDE                 | 0.576                                           | 0.596                            | 1987.31             | 1184.09             | 0.343                            | 1411.79             | 484.72              |
| A_68_P30382913 | chr15:82176419-82176463                           | NM_026914:-35     | 1500032L24Rik | PROMOTER               | 0.462                                           | 0.645                            | 963.38              | 621.00              | 0.298                            | 704.86              | 209.96              |
| A_68_P30382915 | chr15:82176602-82176646                           | NM_026914:149     | 1500032L24Rik | INSIDE                 | 0.361                                           | 0.585                            | 1133.20             | 662.59              | 0.211                            | 926.82              | 195.82              |
| A_68_P30633252 | chr16:28929399-28929443                           | NM_177718:364     | 1600021P15Rik | INSIDE                 | 0.231                                           | 1.334                            | 3525.37             | 4702.95             | 0.309                            | 2392.68             | 738.53              |
| A_68_P30633253 | chr16:28929529-28929573                           | NM_177718:232     | 1600021P15Rik | INSIDE                 | 0.040                                           | 3.548                            | 1827.40             | 6483.44             | 0.143                            | 1069.02             | 152.71              |
| A_68_P21904833 | chr2:180317770-180317815                          | NM_028479:1784    | 1600027N09Rik | INSIDE                 | 0.285                                           | 0.714                            | 1518.90             | 1083.89             | 0.203                            | 1141.79             | 231.82              |
| A_68_P21105254 | chr2:30650269-30650313                            | NM_198000:6937    | 1700001O22Rik | DOWNSTREAM             | 0.221                                           | 0.462                            | 1621.13             | 748.23              | 0.102                            | 1197.51             | 122.03              |
| A_68_P21105302 | chr2:30656577-30656621                            | NM_198000:629     | 1700001O22Rik | INSIDE                 | 0.033                                           | 3.922                            | 16457.71            | 64553.78            | 0.130                            | 10033.62            | 1305.90             |
| A_68_P25505909 | chr7:134655506-134655551                          | NR_024331:855     | 1700008J07Rik | INSIDE                 | 0.096                                           | 0.686                            | 2461.44             | 1688.69             | 0.066                            | 1760.20             | 115.85              |
| A_68_P25505911 | chr7:134655737-134655781                          | NR_024331:625     | 1700008J07Rik | INSIDE                 | 0.248                                           | 0.511                            | 1287.65             | 658.42              | 0.127                            | 1048.62             | 133.01              |
| A_68_P25505917 | chr7:134656518-134656562                          | NR_024331:-157    | 1700008J07Rik | PROMOTER               | 0.358                                           | 0.593                            | 1447.69             | 857.94              | 0.212                            | 1201.80             | 254.90              |
| A_68_P25087020 | chr7:51615740-51615784                            | NM_027049:14638   | 1700008O03Rik | INSIDE                 | 0.377                                           | 0.531                            | 1102.21             | 585.73              | 0.200                            | 868.73              | 174.08              |
| A_68_P25417176 | chr7:118266442-118266486                          | NR_015573:-275    | 1700012D14Rik | PROMOTER               | 0.661                                           | 0.473                            | 1157.80             | 547.26              | 0.312                            | 1034.55             | 323.09              |
| A_68_P26541144 | chr9:57109788-57109832                            | NM_028820:596     | 1700017B05Rik | INSIDE                 | 0.424                                           | 0.699                            | 1446.44             | 1010.98             | 0.297                            | 1101.96             | 326.77              |
| A_68_P26541149 | chr9:57110346-57110390                            | NM_028820:38      | 1700017B05Rik | INSIDE                 | 0.599                                           | 0.630                            | 1570.04             | 989.76              | 0.378                            | 1379.00             | 520.84              |
| A_68_P25614137 | chr8:3476402-3476449                              | NM_029598:5564    | 1700019B03Rik | INSIDE                 | 0.276                                           | 2.077                            | 1712.91             | 3558.55             | 0.574                            | 1103.08             | 633.60              |
| A_68_P28607941 | chr12:87423506-87423550                           | NM_001199843:18   | 1700019E19Rik | INSIDE                 | 0.213                                           | 0.647                            | 1038.30             | 672.16              | 0.138                            | 855.70              | 118.19              |
| A_68_P28607942 | chr12:87423668-87423712                           | NM_001199843:180  | 1700019E19Rik | INSIDE                 | 0.470                                           | 0.595                            | 2058.51             | 1224.67             | 0.280                            | 1637.92             | 458.01              |
| A_68_P20412114 | chr1:88330989-88331033                            | NM_027966:8107    | 1700019O17Rik | DOWNSTREAM             | 0.641                                           | 0.597                            | 2890.85             | 1724.47             | 0.382                            | 2337.87             | 893.83              |
| A_68_P28608855 | chr12:87582934-87582978                           | NM_027405:129     | 1700020O03Rik | INSIDE                 | 0.352                                           | 0.698                            | 4032.55             | 2815.89             | 0.246                            | 3252.59             | 799.85              |
| A_68_P27100908 | chr10:43260523-43260567                           | NM_026411:256     | 1700021F05Rik | INSIDE                 | 0.656                                           | 0.624                            | 1409.83             | 879.04              | 0.409                            | 1221.30             | 499.63              |
| A_68_P21092715 | chr2:28555096-28555140                            | NM_027283:53      | 1700026L06Rik | INSIDE                 | 0.491                                           | 0.650                            | 1138.32             | 739.99              | 0.319                            | 940.14              | 300.02              |
| A_68_P21092717 | chr2:28555343-28555389                            | NM_027283:-195    | 1700026L06Rik | DIVERGENT_PROMOTER     | 0.178                                           | 0.655                            | 1843.17             | 1207.22             | 0.116                            | 1391.48             | 162.00              |

| ProbeName      | Target position of probe on CpG island microarray | TargetID           | GeneSymbol     | CpG island Description | Ratio of relative methylation (TiO2-NP/Vehicle) | Sham group                       |                     |                     | TiO <sub>2</sub> -H group        |                     |                     |
|----------------|---------------------------------------------------|--------------------|----------------|------------------------|-------------------------------------------------|----------------------------------|---------------------|---------------------|----------------------------------|---------------------|---------------------|
|                |                                                   |                    |                |                        |                                                 | Relative methylation (Cy-5/Cy-3) | Cy-3 signal (Input) | Cy-5 signal (MeDIP) | Relative methylation (Cy-5/Cy-3) | Cy-3 signal (Input) | Cy-5 signal (MeDIP) |
| A_68_P20192515 | chr1:44159202-44159246                            | NM_029368:9        | 1700029F09Rik  | INSIDE                 | 0.468                                           | 0.483                            | 1667.14             | 805.58              | 0.226                            | 1423.63             | 321.98              |
| A_68_P23278552 | chr4:125840552-125840597                          | NM_025856:-665     | 1700029G01Rik  | PROMOTER               | 0.133                                           | 0.599                            | 1894.74             | 1134.87             | 0.080                            | 1477.44             | 117.46              |
| A_68_P26200041 | chr8:119502652-119502696                          | NM_027103:169      | 1700030J22Rik  | INSIDE                 | 0.301                                           | 0.583                            | 1336.08             | 779.09              | 0.175                            | 1050.21             | 184.17              |
| A_68_P25961390 | chr8:74967839-74967883                            | NM_028170:82       | 1700030K09Rik  | INSIDE                 | 0.184                                           | 1.398                            | 2528.19             | 3534.89             | 0.257                            | 1772.52             | 456.11              |
| A_68_P27675036 | chr11:29447352-29447406                           | NM_001163521:-571  | 1700034F02Rik  | PROMOTER               | 0.168                                           | 0.691                            | 1265.71             | 874.46              | 0.116                            | 1063.16             | 123.63              |
| A_68_P31891632 | chr18:85121550-85121594                           | NM_025969:-656     | 1700034H14Rik  | PROMOTER               | 0.552                                           | 0.478                            | 2856.82             | 1365.88             | 0.264                            | 2229.58             | 588.18              |
| A_68_P24605099 | chr6:85401740-85401787                            | NR_028081:201      | 1700040I03Rik  | INSIDE                 | 0.281                                           | 0.630                            | 892.75              | 562.20              | 0.177                            | 656.57              | 116.23              |
| A_68_P24605102 | chr6:85402096-85402141                            | NR_028081:-154     | 1700040I03Rik  | PROMOTER               | 0.105                                           | 0.516                            | 2808.24             | 1449.38             | 0.054                            | 2203.86             | 119.42              |
| A_68_P28450732 | chr12:56225370-56225414                           | NM_001100116:-122  | 1700047I17Rik2 | PROMOTER               | 0.481                                           | 0.695                            | 1744.69             | 1213.31             | 0.334                            | 1633.27             | 545.84              |
| A_68_P28450735 | chr12:56225735-56225781                           | NM_001100116:244   | 1700047I17Rik2 | INSIDE                 | 0.242                                           | 0.608                            | 994.36              | 604.88              | 0.147                            | 796.08              | 117.20              |
| A_68_P20893085 | chr1:185857220-185857264                          | NM_028516:635      | 1700056E22Rik  | INSIDE                 | 0.632                                           | 0.641                            | 1625.01             | 1041.74             | 0.405                            | 1221.15             | 494.90              |
| A_68_P20893091 | chr1:185857997-185858041                          | NM_028516:-141     | 1700056E22Rik  | DIVERGENT_PROMOTER     | 0.437                                           | 0.657                            | 861.33              | 565.99              | 0.287                            | 713.63              | 205.10              |
| A_68_P31215873 | chr17:48232887-48232931                           | NM_026625:6327     | 1700067P10Rik  | DOWNSTREAM             | 0.379                                           | 0.730                            | 1820.06             | 1328.36             | 0.277                            | 1416.41             | 391.83              |
| A_68_P31215882 | chr17:48233958-48234004                           | NM_026625:7399     | 1700067P10Rik  | DOWNSTREAM             | 0.288                                           | 0.584                            | 897.20              | 524.07              | 0.168                            | 720.02              | 121.27              |
| A_68_P28091093 | chr11:104304028-104304074                         | NM_001081045:-445  | 1700081L11Rik  | PROMOTER               | 0.217                                           | 0.441                            | 1552.06             | 684.41              | 0.096                            | 1209.75             | 115.88              |
| A_68_P21101976 | chr2:30093104-30093148                            | NR_028299:25       | 1700084E18Rik  | INSIDE                 | 0.233                                           | 0.511                            | 1287.13             | 657.70              | 0.119                            | 1021.28             | 121.43              |
| A_68_P31632918 | chr18:38410055-38410099                           | NR_027904:143      | 1700086O06Rik  | INSIDE                 | 0.664                                           | 0.533                            | 1071.74             | 570.96              | 0.354                            | 893.60              | 316.12              |
| A_68_P23547918 | chr5:25035180-25035225                            | NR_027388:-633     | 1700096K18Rik  | PROMOTER               | 0.516                                           | 0.509                            | 1014.77             | 516.90              | 0.263                            | 909.77              | 239.35              |
| A_68_P23547920 | chr5:25035394-25035438                            | NR_027388:-419     | 1700096K18Rik  | PROMOTER               | 0.433                                           | 0.574                            | 3576.99             | 2052.69             | 0.249                            | 2768.49             | 688.25              |
| A_68_P23547921 | chr5:25035545-25035589                            | NR_027388:-269     | 1700096K18Rik  | PROMOTER               | 0.298                                           | 0.568                            | 3000.72             | 1704.54             | 0.169                            | 2111.86             | 357.66              |
| A_68_P27317703 | chr10:86521047-86521091                           | NM_029685:278      | 1700113H08Rik  | INSIDE                 | 0.624                                           | 0.575                            | 1156.61             | 665.29              | 0.359                            | 870.51              | 312.44              |
| A_68_P29613709 | chr14:55305052-55305096                           | NM_021437:67       | 1700123O20Rik  | INSIDE                 | 0.209                                           | 0.597                            | 1182.48             | 705.82              | 0.125                            | 972.83              | 121.36              |
| A_68_P23296884 | chr4:129168378-129168422                          | NM_001085491:-33   | 1700125D06Rik  | DIVERGENT_PROMOTER     | 0.201                                           | 0.683                            | 1197.36             | 817.50              | 0.137                            | 877.02              | 120.53              |
| A_68_P23296886 | chr4:129168678-129168722                          | NM_001085491:267   | 1700125D06Rik  | INSIDE                 | 0.230                                           | 0.414                            | 1808.23             | 748.83              | 0.095                            | 1441.27             | 137.45              |
| A_68_P23296887 | chr4:129168766-129168810                          | NM_001085491:355   | 1700125D06Rik  | INSIDE                 | 0.345                                           | 0.541                            | 2189.77             | 1184.01             | 0.187                            | 1498.37             | 279.57              |
| A_68_P27268621 | chr10:76978260-76978304                           | NM_133998:276      | 1810008A18Rik  | INSIDE                 | 0.450                                           | 0.667                            | 4574.43             | 3053.04             | 0.301                            | 3239.55             | 973.60              |
| A_68_P27268626 | chr10:76978772-76978818                           | NM_133998:-236     | 1810008A18Rik  | PROMOTER               | 0.088                                           | 0.724                            | 2614.28             | 1893.48             | 0.064                            | 1833.69             | 117.28              |
| A_68_P27945543 | chr11:78640074-78640118                           | NM_001076681:0     | 1810012P15Rik  | INSIDE                 | 0.424                                           | 0.513                            | 1366.42             | 701.09              | 0.218                            | 1211.86             | 263.79              |
| A_68_P27945544 | chr11:78640263-78640307                           | NM_001076681:188   | 1810012P15Rik  | INSIDE                 | 0.270                                           | 0.607                            | 862.96              | 523.41              | 0.164                            | 763.48              | 124.95              |
| A_68_P23699553 | chr5:53658148-53658198                            | NM_001145433:-172  | 1810013D10Rik  | PROMOTER               | 0.219                                           | 0.673                            | 1273.30             | 857.06              | 0.147                            | 1110.20             | 163.35              |
| A_68_P30534541 | chr16:8831297-8831343                             | NM_001081400:1128  | 1810013L24Rik  | INSIDE                 | 0.460                                           | 0.671                            | 952.04              | 638.54              | 0.309                            | 786.53              | 242.84              |
| A_68_P21957614 | chr3:14611075-14611119                            | NM_001099674:160   | 1810022K09Rik  | INSIDE                 | 0.140                                           | 1.474                            | 1437.04             | 2118.18             | 0.207                            | 1109.71             | 229.17              |
| A_68_P21957615 | chr3:14611165-14611209                            | NM_001099674:70    | 1810022K09Rik  | INSIDE                 | 0.169                                           | 1.627                            | 10250.23            | 16677.58            | 0.275                            | 6020.26             | 1657.59             |
| A_68_P21957616 | chr3:14611261-14611305                            | NM_001099674:-26   | 1810022K09Rik  | PROMOTER               | 0.055                                           | 1.711                            | 8239.94             | 14100.84            | 0.094                            | 4815.05             | 454.13              |
| A_68_P25933301 | chr8:69010356-69010400                            | NM_025465:28       | 1810029B16Rik  | INSIDE                 | 0.233                                           | 0.708                            | 3416.36             | 2418.37             | 0.165                            | 2503.84             | 413.15              |
| A_68_P25933302 | chr8:69010455-69010506                            | NM_025465:-74      | 1810029B16Rik  | PROMOTER               | 0.242                                           | 0.675                            | 1746.74             | 1178.53             | 0.164                            | 1330.58             | 217.58              |
| A_68_P20352243 | chr1:75138899-75138957                            | NM_026977:14       | 1810031K17Rik  | INSIDE                 | 0.264                                           | 0.622                            | 1005.25             | 625.04              | 0.164                            | 715.96              | 117.57              |
| A_68_P30394507 | chr15:84237076-84237131                           | NM_001163145:40424 | 1810041L15Rik  | INSIDE                 | 0.649                                           | 5.609                            | 2320.61             | 13015.88            | 3.642                            | 1346.29             | 4902.97             |
| A_68_P30394508 | chr15:84237151-84237195                           | NM_001163145:40355 | 1810041L15Rik  | INSIDE                 | 0.495                                           | 3.611                            | 5381.34             | 19431.95            | 1.786                            | 3483.19             | 6219.70             |
| A_68_P28182349 | chr11:119960272-119960316                         | NM_001110242:47    | 1810043H04Rik  | INSIDE                 | 0.308                                           | 0.394                            | 1425.75             | 561.74              | 0.121                            | 1015.23             | 123.11              |
| A_68_P28182350 | chr11:119960353-119960397                         | NM_001110242:127   | 1810043H04Rik  | INSIDE                 | 0.641                                           | 0.643                            | 2765.61             | 1779.32             | 0.412                            | 2015.50             | 830.58              |
| A_68_P28182351 | chr11:119960438-119960482                         | NM_001110242:213   | 1810043H04Rik  | INSIDE                 | 0.420                                           | 0.433                            | 1670.26             | 723.07              | 0.182                            | 1218.38             | 221.64              |
| A_68_P28182352 | chr11:119960513-119960557                         | NM_001110242:287   | 1810043H04Rik  | INSIDE                 | 0.424                                           | 0.680                            | 1235.58             | 839.70              | 0.288                            | 927.01              | 267.38              |
| A_68_P28056476 | chr11:98300031-98300075                           | NM_025559:250      | 1810046J19Rik  | INSIDE                 | 0.314                                           | 0.612                            | 1741.14             | 1065.91             | 0.192                            | 1258.27             | 241.81              |

| ProbeName      | Target position of probe on CpG island microarray | TargetID          | GeneSymbol    | CpG island Description | Ratio of relative methylation (TiO2-NP/Vehicle) | Sham group                       |                     |                     | TiO <sub>2</sub> -H group        |                     |                     |
|----------------|---------------------------------------------------|-------------------|---------------|------------------------|-------------------------------------------------|----------------------------------|---------------------|---------------------|----------------------------------|---------------------|---------------------|
|                |                                                   |                   |               |                        |                                                 | Relative methylation (Cy-5/Cy-3) | Cy-3 signal (Input) | Cy-5 signal (MeDIP) | Relative methylation (Cy-5/Cy-3) | Cy-3 signal (Input) | Cy-5 signal (MeDIP) |
| A_68_P28532685 | chr12:73637141-73637185                           | NM_026327:-181    | 1810048J1Rik  | PROMOTER               | 0.316                                           | 0.558                            | 1404.89             | 784.23              | 0.176                            | 1118.08             | 196.99              |
| A_68_P31918868 | chr19:3708036-3708080                             | NM_028077:-274    | 1810055G02Rik | PROMOTER               | 0.337                                           | 0.436                            | 1462.67             | 638.10              | 0.147                            | 1340.36             | 196.90              |
| A_68_P31918872 | chr19:3708434-3708478                             | NM_028077:124     | 1810055G02Rik | INSIDE                 | 0.420                                           | 0.582                            | 1229.51             | 715.50              | 0.245                            | 1080.36             | 264.31              |
| A_68_P31918873 | chr19:3708527-3708572                             | NM_028077:217     | 1810055G02Rik | INSIDE                 | 0.216                                           | 0.664                            | 9223.46             | 6124.10             | 0.144                            | 6444.52             | 925.99              |
| A_68_P29445005 | chr14:20902070-20902114                           | NM_026209:302     | 1810063B07Rik | INSIDE                 | 0.254                                           | 0.388                            | 1402.98             | 544.17              | 0.099                            | 1187.66             | 117.17              |
| A_68_P31619432 | chr18:35813900-35813944                           | NM_027222:-4901   | 2010001M09Rik | PROMOTER               | 0.301                                           | 0.538                            | 1419.87             | 764.60              | 0.162                            | 1072.14             | 173.69              |
| A_68_P24127511 | chr5:138220691-138220735                          | NM_027242:567     | 2010007H12Rik | INSIDE                 | 0.288                                           | 0.582                            | 1030.64             | 599.67              | 0.168                            | 736.02              | 123.52              |
| A_68_P21610826 | chr2:126758946-126758990                          | NM_023220:3       | 2010106G01Rik | INSIDE                 | 0.244                                           | 0.617                            | 1130.54             | 697.54              | 0.151                            | 890.64              | 134.16              |
| A_68_P28747155 | chr12:113204858-113204902                         | NM_027360:308     | 2010107E04Rik | INSIDE                 | 0.432                                           | 0.537                            | 1594.75             | 856.04              | 0.232                            | 1321.24             | 306.72              |
| A_68_P28747156 | chr12:113205010-113205054                         | NM_027360:156     | 2010107E04Rik | INSIDE                 | 0.604                                           | 0.507                            | 1478.02             | 750.02              | 0.306                            | 1230.96             | 376.99              |
| A_68_P29509868 | chr14:31941877-31941922                           | NR_024069:217     | 2010107H07Rik | INSIDE                 | 0.130                                           | 0.704                            | 2899.08             | 2041.86             | 0.091                            | 1914.49             | 174.97              |
| A_68_P29509884 | chr14:31943948-31943992                           | NR_024069:-1854   | 2010107H07Rik | DIVERGENT_PROMOTER     | 0.241                                           | 0.517                            | 1129.05             | 583.15              | 0.124                            | 982.77              | 122.29              |
| A_68_P29509891 | chr14:31944757-31944801                           | NR_024069:-2662   | 2010107H07Rik | DIVERGENT_PROMOTER     | 0.601                                           | 5.677                            | 1068.55             | 6065.94             | 3.414                            | 867.90              | 2962.98             |
| A_68_P28336337 | chr12:33063533-33063581                           | NM_001162903:-97  | 2010109K11Rik | PROMOTER               | 0.334                                           | 1.633                            | 1193.02             | 1947.75             | 0.545                            | 864.99              | 471.39              |
| A_68_P23195467 | chr2:108000626-108000670                          | NM_027250:-108    | 2010305A19Rik | PROMOTER               | 0.279                                           | 0.516                            | 1602.85             | 827.23              | 0.144                            | 1309.24             | 188.61              |
| A_68_P23195471 | chr4:108000991-108001035                          | NM_027250:256     | 2010305A19Rik | INSIDE                 | 0.457                                           | 0.734                            | 5938.42             | 4356.88             | 0.336                            | 4483.10             | 1504.40             |
| A_68_P21071706 | chr2:25227652-25227698                            | NM_001081085:-166 | 2010317E24Rik | DIVERGENT_PROMOTER     | 0.263                                           | 0.408                            | 1396.16             | 569.53              | 0.107                            | 1148.30             | 123.05              |
| A_68_P26584997 | chr9:64808465-64808509                            | NM_001077631:-152 | 2010321M09Rik | DIVERGENT_PROMOTER     | 0.425                                           | 0.646                            | 1408.86             | 910.69              | 0.275                            | 1177.75             | 323.77              |
| A_68_P26584998 | chr9:64808639-64808683                            | NM_175153:-83     | 2010321M09Rik | PROMOTER               | 0.361                                           | 0.740                            | 2850.46             | 2110.58             | 0.268                            | 2164.57             | 579.04              |
| A_68_P26584999 | chr9:64808747-64808792                            | NM_175153:26      | 2010321M09Rik | INSIDE                 | 0.108                                           | 1.509                            | 6771.50             | 10220.88            | 0.163                            | 4637.15             | 755.05              |
| A_68_P21665424 | chr2:136717006-136717053                          | NM_028201:76      | 2210009G21Rik | INSIDE                 | 0.216                                           | 0.475                            | 1486.99             | 705.78              | 0.103                            | 1146.17             | 117.69              |
| A_68_P23189064 | chr4:106850847-106850891                          | NM_025617:103     | 2210012G02Rik | INSIDE                 | 0.213                                           | 0.526                            | 2225.36             | 1170.43             | 0.112                            | 1595.14             | 178.77              |
| A_68_P24172796 | chr5:148086210-148086254                          | NR_038157:-3135   | 2210019I11Rik | PROMOTER               | 0.625                                           | 0.522                            | 1982.01             | 1035.05             | 0.326                            | 1761.65             | 575.12              |
| A_68_P30403116 | chr15:85641498-85641553                           | NM_001164625:602  | 2210021J22Rik | INSIDE                 | 0.226                                           | 0.701                            | 2134.13             | 1496.30             | 0.158                            | 1606.59             | 254.60              |
| A_68_P30403119 | chr15:85641848-85641892                           | NM_001164625:257  | 2210021J22Rik | INSIDE                 | 0.538                                           | 0.540                            | 1398.88             | 754.73              | 0.290                            | 1111.34             | 322.74              |
| A_68_P30403120 | chr15:85641984-85642028                           | NM_001164625:121  | 2210021J22Rik | INSIDE                 | 0.157                                           | 0.639                            | 2838.89             | 1814.25             | 0.101                            | 2116.42             | 212.73              |
| A_68_P30403121 | chr15:85642175-85642219                           | NM_001164625:69   | 2210021J22Rik | PROMOTER               | 0.312                                           | 0.575                            | 3923.86             | 2255.17             | 0.179                            | 2919.46             | 523.95              |
| A_68_P29157707 | chr13:77274878-77274925                           | NM_001081353:105  | 2210408I21Rik | INSIDE                 | 0.222                                           | 0.579                            | 1285.00             | 743.45              | 0.129                            | 909.28              | 116.89              |
| A_68_P29157708 | chr13:77274951-77274995                           | NM_001081353:176  | 2210408I21Rik | INSIDE                 | 0.329                                           | 0.475                            | 1619.18             | 769.42              | 0.156                            | 1366.62             | 213.73              |
| A_68_P21070791 | chr2:25096537-25096581                            | NM_026415:-1141   | 2310002J15Rik | DIVERGENT_PROMOTER     | 0.327                                           | 0.621                            | 1681.19             | 1044.39             | 0.203                            | 1276.40             | 259.49              |
| A_68_P21682771 | chr2:139996347-139996391                          | NM_027093:-13     | 2310003L22Rik | DIVERGENT_PROMOTER     | 0.255                                           | 0.594                            | 926.68              | 550.90              | 0.152                            | 801.64              | 121.71              |
| A_68_P27282446 | chr10:79783036-79783080                           | NM_025521:235     | 2310011J03Rik | INSIDE                 | 0.176                                           | 0.489                            | 1952.13             | 955.33              | 0.086                            | 1409.78             | 121.28              |
| A_68_P27282447 | chr10:79783116-79783160                           | NM_025521:155     | 2310011J03Rik | INSIDE                 | 0.433                                           | 0.599                            | 5286.50             | 3169.06             | 0.260                            | 3798.53             | 986.03              |
| A_68_P31161374 | chr17:36002854-36002898                           | NM_001146710:-196 | 2310014H01Rik | PROMOTER               | 0.519                                           | 0.538                            | 1848.47             | 994.37              | 0.279                            | 1230.22             | 343.55              |
| A_68_P24973681 | chr7:13513425-13513470                            | NM_029809:683     | 2310014L17Rik | INSIDE                 | 0.446                                           | 0.693                            | 1574.98             | 1091.79             | 0.309                            | 1150.74             | 355.56              |
| A_68_P24973684 | chr7:13513821-13513865                            | NM_029809:1078    | 2310014L17Rik | INSIDE                 | 0.385                                           | 1.494                            | 1749.65             | 2614.53             | 0.576                            | 1454.10             | 837.63              |
| A_68_P24973685 | chr7:13513884-13513935                            | NM_029809:1145    | 2310014L17Rik | INSIDE                 | 0.332                                           | 1.825                            | 1243.46             | 2269.35             | 0.606                            | 918.27              | 556.08              |
| A_68_P28573970 | chr12:81233412-81233456                           | NR_033514:397     | 2310015A10Rik | INSIDE                 | 0.461                                           | 0.637                            | 1584.81             | 1008.89             | 0.293                            | 1205.71             | 353.78              |
| A_68_P24325497 | chr6:29222598-29222642                            | NM_023516:-5      | 2310016C08Rik | PROMOTER               | 0.118                                           | 0.676                            | 2101.49             | 1420.29             | 0.080                            | 1546.45             | 123.23              |
| A_68_P24325499 | chr6:29222771-29222816                            | NM_023516:168     | 2310016C08Rik | INSIDE                 | 0.325                                           | 0.492                            | 1529.09             | 752.07              | 0.160                            | 1159.55             | 185.56              |
| A_68_P24325500 | chr6:29222845-29222889                            | NM_023516:241     | 2310016C08Rik | INSIDE                 | 0.266                                           | 0.519                            | 1763.29             | 915.53              | 0.138                            | 1391.52             | 191.86              |
| A_68_P30481998 | chr15:99556153-99556197                           | NM_183256:126     | 2310016M24Rik | INSIDE                 | 0.485                                           | 0.664                            | 2354.99             | 1564.25             | 0.322                            | 1729.37             | 556.70              |
| A_68_P30481999 | chr15:99556228-99556272                           | NM_183256:202     | 2310016M24Rik | INSIDE                 | 0.439                                           | 0.660                            | 1722.97             | 1137.77             | 0.290                            | 1309.47             | 379.55              |
| A_68_P29448496 | chr14:21526704-21526748                           | NM_027996:-47     | 2310021P13Rik | PROMOTER               | 0.432                                           | 0.493                            | 1547.75             | 762.95              | 0.213                            | 1138.01             | 242.17              |

| ProbeName      | Target position of probe on CpG island microarray | TargetID          | GeneSymbol    | CpG island Description | Ratio of relative methylation (TiO2-NP/Vehicle) | Sham group                       |                     |                     | TiO <sub>2</sub> -H group        |                     |                     |
|----------------|---------------------------------------------------|-------------------|---------------|------------------------|-------------------------------------------------|----------------------------------|---------------------|---------------------|----------------------------------|---------------------|---------------------|
|                |                                                   |                   |               |                        |                                                 | Relative methylation (Cy-5/Cy-3) | Cy-3 signal (Input) | Cy-5 signal (MeDIP) | Relative methylation (Cy-5/Cy-3) | Cy-3 signal (Input) | Cy-5 signal (MeDIP) |
| A_68_P26246901 | chr8:127187263-127187307                          | NM_175149:-15     | 2310022B05Rik | PROMOTER               | 0.372                                           | 0.509                            | 2820.86             | 1436.60             | 0.190                            | 2109.31             | 399.83              |
| A_68_P23349878 | chr4:138686042-138686091                          | NR_033745:886     | 2310028011Rik | INSIDE                 | 0.207                                           | 0.647                            | 2238.73             | 1447.58             | 0.134                            | 1701.77             | 227.33              |
| A_68_P23349880 | chr4:138686224-138686268                          | NR_033745:706     | 2310028011Rik | INSIDE                 | 0.300                                           | 0.640                            | 828.17              | 529.84              | 0.192                            | 621.75              | 119.45              |
| A_68_P23349886 | chr4:138686821-138686865                          | NR_033745:110     | 2310028011Rik | INSIDE                 | 0.280                                           | 0.548                            | 2023.91             | 1109.13             | 0.153                            | 1605.35             | 246.22              |
| A_68_P22727922 | chr4:11003062-11003106                            | NM_001085493:267  | 2310030N02Rik | INSIDE                 | 0.458                                           | 0.608                            | 1158.70             | 704.54              | 0.279                            | 1073.45             | 299.16              |
| A_68_P22727924 | chr4:11003258-11003303                            | NM_001085493:71   | 2310030N02Rik | INSIDE                 | 0.639                                           | 0.508                            | 1185.00             | 602.42              | 0.325                            | 1010.87             | 328.61              |
| A_68_P22727925 | chr4:11003436-11003481                            | NM_001085493:-107 | 2310030N02Rik | PROMOTER               | 0.124                                           | 0.484                            | 3046.12             | 1474.87             | 0.060                            | 2014.35             | 120.50              |
| A_68_P27835480 | chr11:59021879-59021923                           | NM_024210:38      | 2310033P09Rik | INSIDE                 | 0.396                                           | 0.576                            | 2695.23             | 1552.55             | 0.228                            | 1958.86             | 446.66              |
| A_68_P20504209 | chr1:107560642-107560686                          | NM_029349:227     | 2310035C23Rik | INSIDE                 | 0.470                                           | 0.554                            | 1750.35             | 969.90              | 0.260                            | 1233.58             | 320.97              |
| A_68_P20504214 | chr1:107561226-107561270                          | NM_029349:811     | 2310035C23Rik | INSIDE                 | 0.140                                           | 0.684                            | 2519.03             | 1723.27             | 0.096                            | 1977.98             | 189.90              |
| A_68_P28613111 | chr12:88288337-88288381                           | NM_173735:66      | 2310044G17Rik | INSIDE                 | 0.331                                           | 0.515                            | 2181.83             | 1123.70             | 0.170                            | 1614.00             | 274.96              |
| A_68_P28613115 | chr12:88288746-88288790                           | NM_173735:476     | 2310044G17Rik | INSIDE                 | 0.225                                           | 1.409                            | 2822.27             | 3976.08             | 0.317                            | 1969.41             | 624.83              |
| A_68_P26349728 | chr9:21760084-21760135                            | NM_025870:-87     | 2310047B19Rik | PROMOTER               | 0.383                                           | 0.671                            | 975.05              | 654.41              | 0.257                            | 709.65              | 182.60              |
| A_68_P27892798 | chr11:68873155-68873199                           | NM_028005:-100    | 2310047M10Rik | PROMOTER               | 0.253                                           | 0.442                            | 1362.85             | 602.21              | 0.112                            | 1039.25             | 116.22              |
| A_68_P27892804 | chr11:68873951-68873999                           | NM_028005:698     | 2310047M10Rik | INSIDE                 | 0.224                                           | 0.393                            | 1791.71             | 703.54              | 0.088                            | 1346.38             | 118.62              |
| A_68_P27288030 | chr10:80657437-80657487                           | NR_015477:27      | 2310050B05Rik | INSIDE                 | 0.258                                           | 0.577                            | 951.66              | 548.79              | 0.149                            | 792.99              | 117.91              |
| A_68_P25527991 | chr7:138506051-138506095                          | NM_026655:140     | 2310057M21Rik | INSIDE                 | 0.451                                           | 0.559                            | 1087.60             | 607.53              | 0.252                            | 826.45              | 208.07              |
| A_68_P26199699 | chr8:119445245-119445289                          | NM_026844:70      | 2310061C15Rik | INSIDE                 | 0.593                                           | 0.631                            | 1993.24             | 1257.71             | 0.374                            | 1502.66             | 561.86              |
| A_68_P28155137 | chr11:115626646-115626697                         | NM_028014:-75     | 2310067B10Rik | PROMOTER               | 0.212                                           | 0.619                            | 3676.80             | 2274.87             | 0.131                            | 2447.94             | 321.31              |
| A_68_P28155138 | chr11:115626737-115626781                         | NM_028014:12      | 2310067B10Rik | INSIDE                 | 0.222                                           | 0.657                            | 1110.69             | 729.25              | 0.146                            | 842.23              | 122.66              |
| A_68_P30483171 | chr15:99804219-99804265                           | NR_028124:-524    | 2310068J16Rik | PROMOTER               | 0.353                                           | 0.557                            | 1147.31             | 638.54              | 0.196                            | 923.45              | 181.41              |
| A_68_P23601494 | chr5:35917751-35917795                            | NM_030208:-53     | 2310079F23Rik | DIVERGENT_PROMOTER     | 0.613                                           | 0.579                            | 1261.35             | 730.68              | 0.355                            | 978.75              | 347.82              |
| A_68_P23601495 | chr5:35917857-35917901                            | NM_030208:-159    | 2310079F23Rik | DIVERGENT_PROMOTER     | 0.264                                           | 0.467                            | 1151.30             | 537.11              | 0.123                            | 955.93              | 117.62              |
| A_68_P25376019 | chr7:109054202-109054254                          | NM_025605:-122    | 2400001E08Rik | PROMOTER               | 0.110                                           | 0.718                            | 2195.53             | 1577.26             | 0.079                            | 1625.39             | 128.69              |
| A_68_P25376020 | chr7:109054295-109054339                          | NM_025605:-34     | 2400001E08Rik | PROMOTER               | 0.373                                           | 0.598                            | 1246.58             | 744.90              | 0.223                            | 882.36              | 196.69              |
| A_68_P25376021 | chr7:109054423-109054467                          | NM_025605:94      | 2400001E08Rik | INSIDE                 | 0.448                                           | 0.552                            | 1499.79             | 827.77              | 0.247                            | 1242.59             | 307.04              |
| A_68_P26158468 | chr8:112217560-112217604                          | NM_028018:-388    | 2400003C14Rik | PROMOTER               | 0.452                                           | 0.537                            | 1559.31             | 838.02              | 0.243                            | 1307.15             | 317.74              |
| A_68_P21864322 | chr2:172265854-172265898                          | NM_025542:-201    | 2410001C21Rik | PROMOTER               | 0.376                                           | 0.593                            | 1408.80             | 834.79              | 0.223                            | 1038.56             | 231.34              |
| A_68_P21864323 | chr2:172265966-172266010                          | NM_025542:-89     | 2410001C21Rik | PROMOTER               | 0.281                                           | 0.572                            | 1502.08             | 859.66              | 0.161                            | 1181.28             | 190.27              |
| A_68_P24430831 | chr6:49024182-49024226                            | NM_029353:411     | 2410003K15Rik | INSIDE                 | 0.337                                           | 0.620                            | 1526.36             | 946.80              | 0.209                            | 1324.44             | 277.11              |
| A_68_P24430832 | chr6:49024262-49024309                            | NM_029353:492     | 2410003K15Rik | INSIDE                 | 0.409                                           | 0.678                            | 1040.49             | 705.25              | 0.277                            | 822.87              | 228.27              |
| A_68_P31609276 | chr18:33954463-33954507                           | NR_038151:-61     | 2410004N09Rik | PROMOTER               | 0.560                                           | 0.719                            | 2316.79             | 1666.26             | 0.403                            | 1838.05             | 739.95              |
| A_68_P31609279 | chr18:33954809-33954858                           | NR_038151:288     | 2410004N09Rik | INSIDE                 | 0.288                                           | 0.536                            | 1097.38             | 588.01              | 0.154                            | 778.08              | 120.08              |
| A_68_P31257262 | chr17:56749026-56749070                           | NM_153152:146     | 2410015M20Rik | INSIDE                 | 0.353                                           | 0.592                            | 4505.74             | 2666.45             | 0.209                            | 3180.53             | 664.58              |
| A_68_P31257263 | chr17:56749175-56749221                           | NM_153152:-4      | 2410015M20Rik | DIVERGENT_PROMOTER     | 0.311                                           | 0.650                            | 880.87              | 572.13              | 0.202                            | 647.21              | 130.60              |
| A_68_P28595538 | chr12:85292535-85292579                           | NM_023633:999     | 2410016O06Rik | INSIDE                 | 0.235                                           | 0.678                            | 1223.41             | 829.37              | 0.159                            | 965.04              | 153.78              |
| A_68_P31162735 | chr17:36282108-36282152                           | NR_033517:168     | 2410017H17Rik | INSIDE                 | 0.210                                           | 0.339                            | 2071.48             | 702.04              | 0.071                            | 1698.86             | 121.17              |
| A_68_P24091117 | chr5:130371504-130371553                          | NM_183088:-64     | 2410018M08Rik | DIVERGENT_PROMOTER     | 0.277                                           | 0.508                            | 1104.46             | 561.61              | 0.141                            | 859.59              | 121.15              |
| A_68_P24464804 | chr6:54631784-54631828                            | NM_026629:41      | 2410066E13Rik | INSIDE                 | 0.542                                           | 0.375                            | 1375.53             | 515.97              | 0.203                            | 1127.07             | 229.13              |
| A_68_P24464806 | chr6:54631922-54631966                            | NM_026629:179     | 2410066E13Rik | INSIDE                 | 0.435                                           | 0.525                            | 1947.35             | 1021.62             | 0.228                            | 1774.77             | 404.87              |
| A_68_P24464807 | chr6:54632035-54632079                            | NM_026629:291     | 2410066E13Rik | INSIDE                 | 0.632                                           | 0.590                            | 1040.73             | 613.55              | 0.373                            | 893.50              | 333.04              |
| A_68_P29998440 | chr15:8118886-8118890                             | NM_001162906:-197 | 2410089E03Rik | PROMOTER               | 0.351                                           | 0.576                            | 1234.81             | 711.34              | 0.202                            | 1166.72             | 235.67              |
| A_68_P31992375 | chr19:18745959-18746006                           | NM_026120:713     | 2410127L17Rik | INSIDE                 | 0.163                                           | 0.490                            | 1897.14             | 929.53              | 0.080                            | 1429.31             | 113.89              |
| A_68_P23297491 | chr4:129278370-129278414                          | NM_029748:442     | 2510006D16Rik | INSIDE                 | 0.564                                           | 0.554                            | 1089.87             | 604.22              | 0.313                            | 906.89              | 283.60              |

| ProbeName      | Target position of probe on CpG island microarray | TargetID         | GeneSymbol    | CpG island Description | Ratio of relative methylation (TiO2-NP/Vehicle) | Sham group                       |                     |                     | TiO <sub>2</sub> -H group        |                     |                     |
|----------------|---------------------------------------------------|------------------|---------------|------------------------|-------------------------------------------------|----------------------------------|---------------------|---------------------|----------------------------------|---------------------|---------------------|
|                |                                                   |                  |               |                        |                                                 | Relative methylation (Cy-5/Cy-3) | Cy-3 signal (Input) | Cy-5 signal (MeDIP) | Relative methylation (Cy-5/Cy-3) | Cy-3 signal (Input) | Cy-5 signal (MeDIP) |
| A_68_P27288850 | chr10:80783292-80783342                           | NM_027381:-531   | 2510012J08Rik | PROMOTER               | 0.122                                           | 1.612                            | 9780.00             | 15761.68            | 0.196                            | 5849.40             | 1146.91             |
| A_68_P23391468 | chr4:147315734-147315778                          | NM_029841:753    | 2510039O18Rik | INSIDE                 | 0.607                                           | 0.686                            | 1454.28             | 997.18              | 0.416                            | 1186.43             | 493.83              |
| A_68_P26822981 | chr9:110207579-110207626                          | NM_001081381:-93 | 2610002117Rik | PROMOTER               | 0.267                                           | 0.433                            | 1295.83             | 560.67              | 0.116                            | 1015.06             | 117.37              |
| A_68_P26822982 | chr9:110207662-110207706                          | NM_001081381:-11 | 2610002117Rik | PROMOTER               | 0.519                                           | 0.491                            | 1155.40             | 567.39              | 0.255                            | 918.98              | 234.03              |
| A_68_P26822985 | chr9:110207937-110207981                          | NM_001081381:263 | 2610002117Rik | INSIDE                 | 0.295                                           | 0.546                            | 2450.33             | 1336.68             | 0.161                            | 1753.18             | 282.25              |
| A_68_P23437421 | chr4:154624224-154624268                          | NM_001190445:172 | 2610002J02Rik | INSIDE                 | 0.374                                           | 0.492                            | 3337.24             | 1641.54             | 0.184                            | 2477.98             | 456.36              |
| A_68_P32589660 | chrX:105011451-105011503                          | NM_025921:197    | 2610002M06Rik | INSIDE                 | 0.070                                           | 2.499                            | 2043.26             | 5105.76             | 0.175                            | 685.55              | 119.65              |
| A_68_P20184658 | chr1:42752112-42752171                            | NR_027826:-471   | 2610017I09Rik | DIVERGENT_PROMOTER     | 0.097                                           | 2.128                            | 723.64              | 1539.94             | 0.207                            | 577.58              | 119.60              |
| A_68_P25671550 | chr8:13975017-13975061                            | NM_173744:-261   | 2610019F03Rik | PROMOTER               | 0.443                                           | 0.550                            | 1658.24             | 911.69              | 0.244                            | 1268.81             | 309.06              |
| A_68_P28140558 | chr11:113062660-113062712                         | NR_015556:466    | 2610035D17Rik | INSIDE                 | 0.223                                           | 0.458                            | 1392.18             | 637.90              | 0.102                            | 1134.67             | 115.94              |
| A_68_P28140562 | chr11:113063090-113063135                         | NR_015556:40     | 2610035D17Rik | INSIDE                 | 0.299                                           | 1.773                            | 1746.44             | 3096.57             | 0.529                            | 1170.83             | 619.76              |
| A_68_P30958535 | chr16:90727405-90727449                           | NM_025642:190    | 2610039C10Rik | INSIDE                 | 0.237                                           | 0.541                            | 1226.40             | 663.48              | 0.128                            | 955.47              | 122.43              |
| A_68_P30958537 | chr16:90727677-90727721                           | NM_025642:-82    | 2610039C10Rik | PROMOTER               | 0.443                                           | 0.419                            | 2239.70             | 938.37              | 0.186                            | 1728.55             | 320.74              |
| A_68_P21967930 | chr3:17686893-17686937                            | NR_033490:-3006  | 2610100L16Rik | PROMOTER               | 0.603                                           | 0.621                            | 1124.67             | 697.86              | 0.374                            | 890.64              | 332.99              |
| A_68_P29699589 | chr14:70552945-70552991                           | NM_146055:630    | 2610301G19Rik | INSIDE                 | 0.423                                           | 5.739                            | 4124.45             | 23669.03            | 2.427                            | 2441.32             | 5924.78             |
| A_68_P29699593 | chr14:70553524-70553568                           | NM_146055:52     | 2610301G19Rik | INSIDE                 | 0.226                                           | 0.660                            | 2993.10             | 1974.52             | 0.149                            | 2377.12             | 354.63              |
| A_68_P29699594 | chr14:70553626-70553670                           | NM_146055:-50    | 2610301G19Rik | PROMOTER               | 0.391                                           | 0.531                            | 1427.31             | 757.25              | 0.207                            | 1115.67             | 231.50              |
| A_68_P27942254 | chr11:78075324-78075368                           | NM_001002004:91  | 2610507B11Rik | INSIDE                 | 0.517                                           | 0.572                            | 1212.73             | 693.61              | 0.296                            | 959.54              | 283.96              |
| A_68_P27942255 | chr11:78075391-78075435                           | NM_001002004:157 | 2610507B11Rik | INSIDE                 | 0.440                                           | 0.526                            | 2629.67             | 1382.05             | 0.231                            | 1924.66             | 445.41              |
| A_68_P27942257 | chr11:78075584-78075628                           | NM_001002004:351 | 2610507B11Rik | INSIDE                 | 0.369                                           | 0.544                            | 2133.03             | 1160.71             | 0.201                            | 1619.30             | 325.27              |
| A_68_P27835439 | chr11:59015720-59015764                           | NR_037964:191    | 2610507I01Rik | INSIDE                 | 0.137                                           | 0.588                            | 2042.86             | 1201.16             | 0.080                            | 1539.89             | 123.82              |
| A_68_P27835440 | chr11:59015809-59015853                           | NR_037964:103    | 2610507I01Rik | INSIDE                 | 0.256                                           | 0.488                            | 1229.36             | 599.64              | 0.125                            | 976.08              | 121.97              |
| A_68_P30787361 | chr16:57606603-57606647                           | NM_025599:356    | 2610528E23Rik | INSIDE                 | 0.149                                           | 0.558                            | 1787.63             | 997.60              | 0.083                            | 1398.14             | 116.59              |
| A_68_P21503641 | chr2:106814392-106814436                          | NM_173750:-3866  | 2700007P21Rik | PROMOTER               | 0.341                                           | 0.712                            | 3658.98             | 2605.11             | 0.243                            | 2707.00             | 657.80              |
| A_68_P32070030 | chr19:32464044-32464088                           | NR_033198:361    | 2700046G09Rik | INSIDE                 | 0.496                                           | 0.679                            | 1243.17             | 844.35              | 0.337                            | 1071.11             | 361.03              |
| A_68_P25541690 | chr7:140829066-140829110                          | NM_178115:-269   | 2700050L05Rik | PROMOTER               | 0.368                                           | 0.463                            | 1801.90             | 834.44              | 0.170                            | 1636.13             | 278.48              |
| A_68_P29443675 | chr14:20643061-20643105                           | NM_026528:-37    | 2700060E02Rik | PROMOTER               | 0.538                                           | 0.615                            | 1171.55             | 720.77              | 0.331                            | 1111.87             | 368.15              |
| A_68_P32226224 | chr19:60656314-60656358                           | NM_001172096:590 | 2700078E11Rik | INSIDE                 | 0.263                                           | 0.528                            | 2263.29             | 1194.88             | 0.139                            | 1593.13             | 220.91              |
| A_68_P21393923 | chr2:84510529-84510573                            | NM_001033166:315 | 2700094K13Rik | INSIDE                 | 0.343                                           | 0.538                            | 1529.39             | 822.20              | 0.184                            | 1088.64             | 200.69              |
| A_68_P31456431 | chr17:95149568-95149616                           | NR_024720:153    | 2700099C18Rik | INSIDE                 | 0.260                                           | 0.642                            | 1050.61             | 674.32              | 0.167                            | 722.30              | 120.75              |
| A_68_P21441000 | chr2:94246926-94246970                            | NR_027831:85     | 2810002D19Rik | INSIDE                 | 0.300                                           | 0.402                            | 1299.08             | 521.91              | 0.121                            | 963.26              | 116.22              |
| A_68_P28853132 | chr13:17786964-17787008                           | NM_025479:-260   | 2810021B07Rik | DIVERGENT_PROMOTER     | 0.156                                           | 0.737                            | 2772.38             | 2041.88             | 0.115                            | 1955.65             | 224.62              |
| A_68_P27833210 | chr11:58680690-58680734                           | NM_172403:-29    | 2810021J22Rik | PROMOTER               | 0.203                                           | 0.471                            | 1495.18             | 704.17              | 0.095                            | 1292.19             | 123.35              |
| A_68_P22141947 | chr3:53267624-53267668                            | NM_173382:-92    | 2810046L04Rik | DIVERGENT_PROMOTER     | 0.276                                           | 0.374                            | 1367.28             | 511.93              | 0.103                            | 1194.18             | 123.56              |
| A_68_P27897804 | chr11:69714837-69714881                           | NM_027419:-370   | 2810408A11Rik | DIVERGENT_PROMOTER     | 0.203                                           | 0.623                            | 2830.13             | 1763.22             | 0.127                            | 2153.95             | 272.76              |
| A_68_P28182937 | chr11:120046685-120046736                         | NR_030682:4460   | 2810410L24Rik | DOWNSTREAM             | 0.204                                           | 0.708                            | 1312.95             | 929.89              | 0.144                            | 990.91              | 143.01              |
| A_68_P28182972 | chr11:120050647-120050697                         | NR_030682:498    | 2810410L24Rik | INSIDE                 | 0.255                                           | 0.531                            | 1271.45             | 674.60              | 0.135                            | 863.83              | 116.90              |
| A_68_P28182973 | chr11:120050796-120050840                         | NR_030682:352    | 2810410L24Rik | INSIDE                 | 0.234                                           | 0.512                            | 1211.69             | 620.02              | 0.120                            | 1017.97             | 121.81              |
| A_68_P25952415 | chr8:73046804-73046848                            | NM_029366:253    | 2810422J05Rik | INSIDE                 | 0.239                                           | 0.593                            | 3218.37             | 1908.33             | 0.142                            | 2295.64             | 325.10              |
| A_68_P25952418 | chr8:73047097-73047144                            | NM_029366:-41    | 2810422J05Rik | DIVERGENT_PROMOTER     | 0.220                                           | 0.459                            | 1642.77             | 754.01              | 0.101                            | 1173.97             | 118.38              |
| A_68_P28788254 | chr13:3477478-3477522                             | NR_015522:-48    | 2810429I04Rik | PROMOTER               | 0.275                                           | 0.649                            | 3641.31             | 2362.40             | 0.178                            | 2668.69             | 475.74              |
| A_68_P28788255 | chr13:3477597-3477641                             | NR_015522:70     | 2810429I04Rik | INSIDE                 | 0.303                                           | 0.585                            | 2232.57             | 1306.06             | 0.177                            | 1586.41             | 281.05              |
| A_68_P22863908 | chr4:41660593-41660637                            | NM_027278:-65    | 2810432D09Rik | PROMOTER               | 0.650                                           | 0.535                            | 1473.68             | 788.48              | 0.348                            | 1281.32             | 445.32              |
| A_68_P23545745 | chr5:24606880-24606928                            | NR_027851:112    | 2900005J15Rik | INSIDE                 | 0.260                                           | 0.644                            | 954.35              | 614.72              | 0.167                            | 713.29              | 119.41              |

| ProbeName      | Target position of probe on CpG island microarray | TargetID           | GeneSymbol    | CpG island Description | Ratio of relative methylation (TiO2-NP/Vehicle) | Sham group                       |                     |                     | TiO <sub>2</sub> -H group        |                     |                     |
|----------------|---------------------------------------------------|--------------------|---------------|------------------------|-------------------------------------------------|----------------------------------|---------------------|---------------------|----------------------------------|---------------------|---------------------|
|                |                                                   |                    |               |                        |                                                 | Relative methylation (Cy-5/Cy-3) | Cy-3 signal (Input) | Cy-5 signal (MeDIP) | Relative methylation (Cy-5/Cy-3) | Cy-3 signal (Input) | Cy-5 signal (MeDIP) |
| A_68_P23545746 | chr5:24606967-24607011                            | NR_027851:196      | 29000051J5Rik | INSIDE                 | 0.299                                           | 0.607                            | 2727.40             | 1655.22             | 0.181                            | 2023.02             | 366.75              |
| A_68_P31114504 | chr17:27270575-27270620                           | NM_026063:239      | 2900010M23Rik | INSIDE                 | 0.625                                           | 0.666                            | 2784.56             | 1854.97             | 0.416                            | 2154.48             | 896.31              |
| A_68_P23996379 | chr5:113567220-113567264                          | NM_172884:25091    | 2900026A02Rik | INSIDE                 | 0.229                                           | 0.720                            | 1688.07             | 1214.90             | 0.165                            | 1308.43             | 215.28              |
| A_68_P23996380 | chr5:113567336-113567380                          | NM_172884:24975    | 2900026A02Rik | INSIDE                 | 0.597                                           | 0.491                            | 1434.83             | 705.15              | 0.293                            | 1109.33             | 325.36              |
| A_68_P23996382 | chr5:113567569-113567615                          | NM_172884:24741    | 2900026A02Rik | INSIDE                 | 0.586                                           | 0.508                            | 1928.01             | 979.69              | 0.298                            | 1581.06             | 470.66              |
| A_68_P20551799 | chr1:120356444-120356488                          | NR_027901:-624     | 2900060B14Rik | PROMOTER               | 0.182                                           | 0.680                            | 2315.07             | 1575.21             | 0.124                            | 1653.86             | 204.26              |
| A_68_P21528941 | chr2:112295418-112295462                          | NM_133749:259      | 2900064A13Rik | INSIDE                 | 0.208                                           | 0.657                            | 1184.08             | 778.36              | 0.137                            | 868.83              | 119.05              |
| A_68_P27787096 | chr1:49988189-49988233                            | NM_026543:-142     | 3010026O09Rik | PROMOTER               | 0.275                                           | 0.462                            | 1569.17             | 725.65              | 0.127                            | 1145.00             | 145.41              |
| A_68_P27787098 | chr1:49988398-49988442                            | NM_026543:68       | 3010026O09Rik | INSIDE                 | 0.252                                           | 0.670                            | 3617.47             | 2424.19             | 0.169                            | 2600.39             | 438.38              |
| A_68_P27787100 | chr1:49988573-49988624                            | NM_026543:246      | 3010026O09Rik | INSIDE                 | 0.484                                           | 0.595                            | 1168.90             | 695.64              | 0.288                            | 776.36              | 223.67              |
| A_68_P23023123 | chr4:74923898-74923942                            | NM_025849:270      | 3110001D03Rik | INSIDE                 | 0.548                                           | 0.648                            | 1123.40             | 728.35              | 0.355                            | 848.05              | 301.35              |
| A_68_P23023125 | chr4:74924188-74924236                            | NM_025849:-22      | 3110001D03Rik | PROMOTER               | 0.191                                           | 0.638                            | 1264.85             | 806.60              | 0.122                            | 1023.28             | 124.89              |
| A_68_P26973142 | chr10:17742734-17742778                           | NM_028440:302      | 3110003A17Rik | INSIDE                 | 0.289                                           | 0.605                            | 3596.24             | 2174.83             | 0.175                            | 2581.80             | 450.71              |
| A_68_P20560376 | chr1:122017920-122017975                          | NM_001172074:184   | 3110009E18Rik | INSIDE                 | 0.072                                           | 1.646                            | 1745.17             | 2873.17             | 0.118                            | 1163.32             | 137.64              |
| A_68_P22834880 | chr4:35172594-35172638                            | NM_001081343:513   | 3110043O21Rik | INSIDE                 | 0.283                                           | 0.592                            | 889.38              | 526.11              | 0.167                            | 743.22              | 124.48              |
| A_68_P22834883 | chr4:35172926-35172970                            | NM_001081343:181   | 3110043O21Rik | INSIDE                 | 0.409                                           | 0.669                            | 955.75              | 639.50              | 0.274                            | 791.03              | 216.49              |
| A_68_P23746644 | chr5:64040795-64040839                            | NM_177006:475      | 3110047P20Rik | INSIDE                 | 0.153                                           | 0.509                            | 1926.17             | 981.37              | 0.078                            | 1544.37             | 120.72              |
| A_68_P27285911 | chr10:80318512-80318556                           | NM_175195:515      | 3110056O03Rik | INSIDE                 | 0.337                                           | 0.551                            | 1278.89             | 704.99              | 0.186                            | 997.38              | 185.43              |
| A_68_P24358386 | chr6:34827862-34827906                            | NM_001135611:181   | 3110062M04Rik | INSIDE                 | 0.158                                           | 0.465                            | 2119.36             | 984.89              | 0.073                            | 1593.11             | 116.88              |
| A_68_P24358388 | chr6:34828039-34828083                            | NM_001135611:5     | 3110062M04Rik | INSIDE                 | 0.354                                           | 0.388                            | 2876.05             | 1117.23             | 0.138                            | 2102.69             | 289.36              |
| A_68_P31183534 | chr7:42453113-42453157                            | NM_028474:239      | 3110082D06Rik | INSIDE                 | 0.188                                           | 1.500                            | 2124.97             | 3186.90             | 0.282                            | 1389.09             | 391.23              |
| A_68_P24135765 | chr5:139936243-139936287                          | NM_028469:224      | 3110082I17Rik | INSIDE                 | 0.157                                           | 1.365                            | 4117.54             | 5621.09             | 0.214                            | 2785.72             | 596.43              |
| A_68_P25375960 | chr7:109044724-109044768                          | NM_027532:-182     | 3200002M19Rik | PROMOTER               | 0.661                                           | 0.649                            | 1096.91             | 712.10              | 0.429                            | 1002.42             | 430.31              |
| A_68_P21812326 | chr2:163244652-163244697                          | NM_025699:532      | 3230401D17Rik | INSIDE                 | 0.347                                           | 0.550                            | 1403.57             | 771.87              | 0.191                            | 1069.58             | 204.11              |
| A_68_P28577068 | chr12:81793936-81793980                           | NM_001177503:371   | 3830431G21Rik | INSIDE                 | 0.390                                           | 0.530                            | 1326.37             | 703.50              | 0.207                            | 1003.11             | 207.54              |
| A_68_P32050338 | chr19:29038878-29038922                           | NM_198651:-256     | 4430402I18Rik | PROMOTER               | 0.309                                           | 0.540                            | 1263.74             | 682.01              | 0.167                            | 1227.41             | 204.57              |
| A_68_P21977361 | chr3:19795434-19795478                            | NR_027985:586      | 4632415L05Rik | INSIDE                 | 0.068                                           | 0.670                            | 3689.45             | 2470.52             | 0.046                            | 2570.35             | 117.06              |
| A_68_P25326410 | chr7:99889553-99889597                            | NR_015510:395      | 4632427E13Rik | INSIDE                 | 0.418                                           | 0.613                            | 1591.85             | 975.17              | 0.256                            | 1213.29             | 310.51              |
| A_68_P25327110 | chr7:100022539-100022587                          | NM_001080995:180   | 4632434I11Rik | INSIDE                 | 0.262                                           | 0.488                            | 1052.76             | 513.29              | 0.128                            | 925.58              | 118.30              |
| A_68_P25327115 | chr7:100023177-100023221                          | NM_001080995:-456  | 4632434I11Rik | DIVERGENT_PROMOTER     | 0.153                                           | 1.432                            | 4311.10             | 6174.69             | 0.219                            | 2980.57             | 653.60              |
| A_68_P24938724 | chr6:148160617-148160668                          | NR_015615:-167     | 4732416N19Rik | PROMOTER               | 0.246                                           | 0.544                            | 1132.18             | 616.32              | 0.134                            | 902.71              | 120.87              |
| A_68_P24938726 | chr6:148160773-148160817                          | NR_015615:-15      | 4732416N19Rik | PROMOTER               | 0.322                                           | 0.722                            | 4696.46             | 3388.84             | 0.233                            | 3349.09             | 778.85              |
| A_68_P25010196 | chr7:26180415-26180459                            | NR_015569:4        | 4732471J01Rik | INSIDE                 | 0.241                                           | 0.567                            | 1132.31             | 641.65              | 0.136                            | 846.53              | 115.51              |
| A_68_P25010197 | chr7:26180486-26180536                            | NR_015569:78       | 4732471J01Rik | INSIDE                 | 0.297                                           | 0.409                            | 1377.94             | 563.29              | 0.121                            | 1038.30             | 126.07              |
| A_68_P25010199 | chr7:26180658-26180710                            | NR_015569:252      | 4732471J01Rik | INSIDE                 | 0.276                                           | 0.586                            | 917.67              | 537.74              | 0.162                            | 731.17              | 118.37              |
| A_68_P29050102 | chr13:54666387-54666431                           | NM_133797:335      | 4833439L19Rik | INSIDE                 | 0.215                                           | 0.664                            | 3256.05             | 2160.82             | 0.143                            | 2139.99             | 305.26              |
| A_68_P29050105 | chr13:54666706-54666750                           | NM_133797:15       | 4833439L19Rik | INSIDE                 | 0.194                                           | 0.550                            | 1363.30             | 749.81              | 0.107                            | 1169.34             | 124.90              |
| A_68_P28463393 | chr12:58677002-58677046                           | NM_001037743:11923 | 4921506M07Rik | INSIDE                 | 0.413                                           | 0.680                            | 1762.12             | 1197.90             | 0.281                            | 1675.53             | 470.49              |
| A_68_P28463396 | chr12:58677361-58677405                           | NM_001037743:12281 | 4921506M07Rik | INSIDE                 | 0.337                                           | 0.690                            | 2575.94             | 1778.36             | 0.233                            | 1996.79             | 464.33              |
| A_68_P28463397 | chr12:58677434-58677478                           | NM_001037743:12355 | 4921506M07Rik | INSIDE                 | 0.339                                           | 0.725                            | 1649.62             | 1195.56             | 0.246                            | 1211.69             | 298.10              |
| A_68_P30560720 | chr16:14159038-14159083                           | NM_001081154:307   | 4921513D23Rik | INSIDE                 | 0.408                                           | 0.497                            | 2073.99             | 1031.49             | 0.203                            | 1636.44             | 332.16              |
| A_68_P21770587 | chr2:156137562-156137616                          | NM_027585:-620     | 4921517L17Rik | PROMOTER               | 0.189                                           | 0.483                            | 1762.59             | 851.11              | 0.091                            | 1271.12             | 116.03              |
| A_68_P21900712 | chr2:179711703-179711747                          | NR_033782:167      | 4921531C22Rik | INSIDE                 | 0.525                                           | 0.563                            | 1067.86             | 601.46              | 0.296                            | 855.19              | 253.06              |
| A_68_P27554557 | chr11:3794614-3794660                             | NM_026150:493      | 4921536K21Rik | INSIDE                 | 0.210                                           | 0.685                            | 1094.46             | 750.24              | 0.144                            | 853.87              | 122.70              |

| ProbeName      | Target position of probe on CpG island microarray | TargetID          | GeneSymbol    | CpG island Description | Ratio of relative methylation (TiO2-NP/Vehicle) | Sham group                       |                     |                     | TiO <sub>2</sub> -H group        |                     |                     |
|----------------|---------------------------------------------------|-------------------|---------------|------------------------|-------------------------------------------------|----------------------------------|---------------------|---------------------|----------------------------------|---------------------|---------------------|
|                |                                                   |                   |               |                        |                                                 | Relative methylation (Cy-5/Cy-3) | Cy-3 signal (Input) | Cy-5 signal (MeDIP) | Relative methylation (Cy-5/Cy-3) | Cy-3 signal (Input) | Cy-5 signal (MeDIP) |
| A_68_P27554558 | chr11:3794697-3794745                             | NM_026150:409     | 4921536K21Rik | INSIDE                 | 0.203                                           | 0.615                            | 1690.84             | 1039.26             | 0.125                            | 1225.11             | 153.16              |
| A_68_P21631946 | chr2:130665493-130665537                          | NM_029432:332     | 4930402H24Rik | INSIDE                 | 0.097                                           | 0.579                            | 2842.83             | 1647.26             | 0.056                            | 2115.54             | 118.97              |
| A_68_P20997485 | chr2:9803030-9803074                              | NR_024257:180     | 4930412O13Rik | INSIDE                 | 0.316                                           | 0.640                            | 2306.32             | 1475.50             | 0.202                            | 1708.55             | 345.24              |
| A_68_P20997496 | chr2:9804242-9804286                              | NR_024257:1392    | 4930412O13Rik | INSIDE                 | 0.578                                           | 0.432                            | 1238.32             | 535.15              | 0.250                            | 906.54              | 226.47              |
| A_68_P20997499 | chr2:9804639-9804695                              | NR_024257:1794    | 4930412O13Rik | INSIDE                 | 0.148                                           | 0.705                            | 1524.16             | 1075.11             | 0.104                            | 1142.43             | 119.23              |
| A_68_P28755046 | chr12:114394157-114394201                         | NM_134041:-453    | 4930427A07Rik | PROMOTER               | 0.271                                           | 0.339                            | 2445.69             | 827.90              | 0.092                            | 1889.02             | 173.14              |
| A_68_P28755050 | chr12:114394591-114394636                         | NM_134041:-18     | 4930427A07Rik | PROMOTER               | 0.308                                           | 0.424                            | 2383.78             | 1010.51             | 0.131                            | 1862.38             | 243.31              |
| A_68_P28755052 | chr12:114394756-114394800                         | NM_134041:147     | 4930427A07Rik | INSIDE                 | 0.463                                           | 0.324                            | 1702.21             | 551.06              | 0.150                            | 1313.65             | 196.77              |
| A_68_P22037673 | chr3:32264387-32264431                            | NR_027966:-2      | 4930429B21Rik | PROMOTER               | 0.655                                           | 0.458                            | 4313.59             | 1976.21             | 0.300                            | 3350.07             | 1005.86             |
| A_68_P30686473 | chr16:38522456-38522500                           | NM_024273:269     | 4930455C21Rik | INSIDE                 | 0.439                                           | 0.485                            | 1655.14             | 803.08              | 0.213                            | 1287.88             | 274.02              |
| A_68_P30686477 | chr16:38522888-38522932                           | NM_024273:-163    | 4930455C21Rik | PROMOTER               | 0.492                                           | 0.730                            | 1769.00             | 1292.00             | 0.359                            | 1288.50             | 462.83              |
| A_68_P32388635 | chrX:51019534-51019578                            | NM_029142:-8451   | 4930502E18Rik | PROMOTER               | 0.125                                           | 1.397                            | 1691.96             | 2363.75             | 0.174                            | 691.77              | 120.70              |
| A_68_P31809744 | chr18:70631379-70631435                           | NM_172967:728     | 4930503L19Rik | INSIDE                 | 0.222                                           | 0.629                            | 1113.79             | 700.24              | 0.139                            | 864.49              | 120.41              |
| A_68_P31809747 | chr18:70631630-70631674                           | NM_172967:482     | 4930503L19Rik | INSIDE                 | 0.350                                           | 0.589                            | 1543.07             | 908.65              | 0.206                            | 1154.66             | 237.68              |
| A_68_P26085411 | chr8:98330678-98330722                            | NR_015574:-29     | 4930513N10Rik | PROMOTER               | 0.103                                           | 0.695                            | 7015.31             | 4878.62             | 0.071                            | 4904.43             | 350.38              |
| A_68_P26085412 | chr8:98330809-98330853                            | NR_015574:101     | 4930513N10Rik | INSIDE                 | 0.239                                           | 0.528                            | 1077.22             | 569.02              | 0.126                            | 955.36              | 120.83              |
| A_68_P24006041 | chr5:115224674-115224718                          | NR_027872:296     | 4930515G01Rik | INSIDE                 | 0.483                                           | 0.522                            | 1829.39             | 954.87              | 0.252                            | 1493.79             | 376.31              |
| A_68_P33012177 | chr9_random:57060-57104                           | NR_027950:2390    | 4930526I15Rik | DOWNSTREAM             | 0.207                                           | 0.426                            | 2559.74             | 1089.63             | 0.088                            | 1905.00             | 167.60              |
| A_68_P33012178 | chr9_random:57139-57183                           | NR_027950:2468    | 4930526I15Rik | DOWNSTREAM             | 0.503                                           | 0.409                            | 1912.33             | 781.62              | 0.206                            | 1501.20             | 308.77              |
| A_68_P33012180 | chr9_random:57290-57334                           | NR_027950:2620    | 4930526I15Rik | DOWNSTREAM             | 0.295                                           | 0.671                            | 1868.30             | 1253.84             | 0.198                            | 1395.16             | 276.24              |
| A_68_P33012181 | chr9_random:57403-57447                           | NR_027950:2732    | 4930526I15Rik | DOWNSTREAM             | 0.414                                           | 0.557                            | 1497.55             | 834.42              | 0.231                            | 1276.19             | 294.67              |
| A_68_P31099615 | chr7:24941244-24941288                            | NM_029197:-60     | 4930528F23Rik | PROMOTER               | 0.578                                           | 0.577                            | 956.95              | 552.02              | 0.333                            | 928.45              | 309.45              |
| A_68_P22552058 | chr3:135101385-135101433                          | NR_030689:221     | 4930539J05Rik | INSIDE                 | 0.231                                           | 0.462                            | 1382.80             | 638.29              | 0.107                            | 1089.09             | 116.36              |
| A_68_P22552059 | chr3:135101503-135101547                          | NR_030689:105     | 4930539J05Rik | INSIDE                 | 0.196                                           | 0.472                            | 1831.15             | 863.82              | 0.092                            | 1272.31             | 117.43              |
| A_68_P27910205 | chr11:72028532-72028576                           | NM_001163728:-85  | 4930563E22Rik | PROMOTER               | 0.550                                           | 0.471                            | 1501.69             | 707.05              | 0.259                            | 1237.94             | 320.34              |
| A_68_P27910207 | chr11:72028699-72028750                           | NM_001163728:85   | 4930563E22Rik | INSIDE                 | 0.597                                           | 0.520                            | 1367.10             | 711.38              | 0.310                            | 1077.14             | 334.38              |
| A_68_P24091170 | chr5:130384460-130384504                          | NM_026916:73      | 4930579G22Rik | INSIDE                 | 0.530                                           | 0.567                            | 2042.86             | 1157.47             | 0.300                            | 1718.06             | 515.90              |
| A_68_P25457394 | chr7:125387430-125387474                          | NR_027879:32      | 4930583K01Rik | INSIDE                 | 0.346                                           | 0.664                            | 1675.75             | 1113.01             | 0.230                            | 1298.59             | 298.55              |
| A_68_P25457396 | chr7:125387673-125387717                          | NR_027879:274     | 4930583K01Rik | INSIDE                 | 0.541                                           | 0.431                            | 2179.68             | 939.57              | 0.233                            | 1564.34             | 364.96              |
| A_68_P29613142 | chr14:55203593-55203649                           | NM_028890:21125   | 4931414P19Rik | INSIDE                 | 0.528                                           | 3.177                            | 531.23              | 1687.54             | 1.678                            | 473.37              | 794.39              |
| A_68_P26132762 | chr8:107813304-107813348                          | NM_001166394:102  | 4931428F04Rik | INSIDE                 | 0.337                                           | 0.654                            | 2913.44             | 1904.57             | 0.220                            | 2154.06             | 474.43              |
| A_68_P26132765 | chr8:107813703-107813757                          | NM_001166394:-302 | 4931428F04Rik | PROMOTER               | 0.227                                           | 0.493                            | 1401.74             | 691.31              | 0.112                            | 1099.34             | 123.31              |
| A_68_P21626541 | chr2:129626864-129626913                          | NR_029452:307     | 4932416H05Rik | INSIDE                 | 0.274                                           | 0.558                            | 1137.42             | 634.55              | 0.153                            | 793.43              | 121.37              |
| A_68_P21626548 | chr2:129627604-129627648                          | NR_029452:-431    | 4932416H05Rik | PROMOTER               | 0.609                                           | 0.560                            | 2485.64             | 1392.84             | 0.342                            | 1718.23             | 586.82              |
| A_68_P21626549 | chr2:129627707-129627751                          | NR_029452:-533    | 4932416H05Rik | PROMOTER               | 0.185                                           | 0.590                            | 3038.78             | 1794.00             | 0.109                            | 2191.57             | 239.36              |
| A_68_P23720349 | chr5:58108780-58108824                            | NR_015588:356     | 4932441J04Rik | INSIDE                 | 0.208                                           | 0.355                            | 2032.39             | 722.34              | 0.074                            | 1583.11             | 116.77              |
| A_68_P23720350 | chr5:58108862-58108920                            | NR_015588:268     | 4932441J04Rik | INSIDE                 | 0.310                                           | 0.437                            | 1280.56             | 560.18              | 0.136                            | 858.56              | 116.48              |
| A_68_P23588492 | chr5:33721019-33721068                            | NM_001081101:-301 | 4933407H18Rik | PROMOTER               | 0.182                                           | 0.576                            | 1422.67             | 818.82              | 0.105                            | 1132.97             | 118.89              |
| A_68_P25834611 | chr8:47248829-47248873                            | NM_025747:-6059   | 4933411K20Rik | PROMOTER               | 0.393                                           | 0.377                            | 1891.58             | 713.22              | 0.148                            | 1452.97             | 215.28              |
| A_68_P22402613 | chr3:106525217-106525262                          | NM_001039488:640  | 4933421E11Rik | INSIDE                 | 0.465                                           | 0.674                            | 3373.51             | 2272.66             | 0.313                            | 2582.86             | 808.30              |
| A_68_P30339073 | chr15:74539555-74539599                           | NR_033197:-14     | 4933427E11Rik | PROMOTER               | 0.594                                           | 0.475                            | 1781.36             | 846.98              | 0.282                            | 1168.47             | 329.98              |
| A_68_P25471459 | chr7:128126104-128126148                          | NM_028955:104     | 4933427G17Rik | INSIDE                 | 0.573                                           | 0.600                            | 1261.10             | 756.18              | 0.344                            | 1044.62             | 359.02              |
| A_68_P25471460 | chr7:128126217-128126263                          | NM_028955:218     | 4933427G17Rik | INSIDE                 | 0.322                                           | 0.594                            | 1391.28             | 826.12              | 0.191                            | 1011.77             | 193.60              |
| A_68_P22964960 | chr4:62186324-62186371                            | NM_177607:-55     | 4933430I17Rik | DIVERGENT_PROMOTER     | 0.475                                           | 0.529                            | 1219.13             | 644.59              | 0.251                            | 848.41              | 212.90              |



| ProbeName      | Target position of probe on CpG island microarray | TargetID          | GeneSymbol    | CpG island Description | Ratio of relative methylation (TiO2-NP/Vehicle) | Sham group                       |                     |                     | TiO <sub>2</sub> -H group        |                     |                     |
|----------------|---------------------------------------------------|-------------------|---------------|------------------------|-------------------------------------------------|----------------------------------|---------------------|---------------------|----------------------------------|---------------------|---------------------|
|                |                                                   |                   |               |                        |                                                 | Relative methylation (Cy-5/Cy-3) | Cy-3 signal (Input) | Cy-5 signal (MeDIP) | Relative methylation (Cy-5/Cy-3) | Cy-3 signal (Input) | Cy-5 signal (MeDIP) |
| A_68_P22964961 | chr4:62186403-62186447                            | NM_177607:22      | 4933430117Rik | INSIDE                 | 0.287                                           | 0.665                            | 1107.30             | 735.94              | 0.191                            | 996.80              | 190.04              |
| A_68_P30367722 | chr15:79489390-79489434                           | NM_029407:-26     | 4933432B09Rik | DIVERGENT_PROMOTER     | 0.426                                           | 0.502                            | 1548.19             | 776.84              | 0.214                            | 1181.94             | 252.65              |
| A_68_P28710689 | chr12:106923839-106923883                         | NM_178613:299     | 4933433P14Rik | INSIDE                 | 0.196                                           | 0.704                            | 1230.52             | 866.51              | 0.138                            | 979.94              | 135.01              |
| A_68_P26065123 | chr8:94880083-94880127                            | NR_033641:-85     | 4933436C20Rik | DIVERGENT_PROMOTER     | 0.389                                           | 1.413                            | 1248.29             | 1763.93             | 0.550                            | 857.60              | 471.77              |
| A_68_P26065129 | chr8:94880803-94880847                            | NR_033641:-805    | 4933436C20Rik | DIVERGENT_PROMOTER     | 0.103                                           | 0.628                            | 2822.65             | 1772.14             | 0.065                            | 1886.33             | 122.16              |
| A_68_P27842897 | chr11:60231302-60231346                           | NM_025757:678     | 4933439F18Rik | INSIDE                 | 0.654                                           | 0.655                            | 1006.25             | 659.05              | 0.429                            | 775.80              | 332.46              |
| A_68_P22130347 | chr3:51364112-51364156                            | NR_033624:456     | 5031434O11Rik | INSIDE                 | 0.179                                           | 0.478                            | 1863.67             | 890.38              | 0.085                            | 1364.20             | 116.63              |
| A_68_P21773772 | chr2:156688598-156688643                          | NR_015591:61      | 5430405H02Rik | INSIDE                 | 0.463                                           | 0.535                            | 1153.63             | 617.68              | 0.248                            | 995.21              | 246.50              |
| A_68_P23929548 | chr5:100858327-100858371                          | NR_034038:206     | 5430416N02Rik | INSIDE                 | 0.250                                           | 0.310                            | 2096.69             | 649.23              | 0.077                            | 1558.90             | 120.54              |
| A_68_P24908452 | chr6:143048181-143048225                          | NM_001109688:425  | 5730419I09Rik | INSIDE                 | 0.664                                           | 0.479                            | 1960.53             | 938.78              | 0.318                            | 1721.28             | 547.51              |
| A_68_P24908455 | chr6:143048545-143048589                          | NM_001109688:61   | 5730419I09Rik | INSIDE                 | 0.261                                           | 1.471                            | 3034.78             | 4463.86             | 0.384                            | 2078.50             | 798.52              |
| A_68_P24183686 | chr5:149995738-149995782                          | NR_015478:-121    | 5730422E09Rik | DIVERGENT_PROMOTER     | 0.286                                           | 0.546                            | 995.30              | 543.23              | 0.156                            | 763.11              | 119.15              |
| A_68_P32100295 | chr19:38298465-38298509                           | NM_001081075:136  | 5730455O13Rik | INSIDE                 | 0.361                                           | 0.520                            | 1351.82             | 702.50              | 0.187                            | 1104.35             | 206.90              |
| A_68_P24449864 | chr6:52264164-52264215                            | NR_038163:637     | 5730457N03Rik | INSIDE                 | 0.327                                           | 0.527                            | 1015.98             | 535.84              | 0.173                            | 706.77              | 122.05              |
| A_68_P24449865 | chr6:52264311-52264355                            | NR_038163:494     | 5730457N03Rik | INSIDE                 | 0.468                                           | 0.442                            | 1882.45             | 831.31              | 0.207                            | 1404.11             | 290.39              |
| A_68_P33008134 | chr12:18521060-18521104                           | NM_001033157:-233 | 5730507C01Rik | PROMOTER               | 0.422                                           | 0.675                            | 2966.19             | 2001.15             | 0.285                            | 2172.47             | 618.07              |
| A_68_P27661783 | chr11:26110740-26110784                           | NR_027973:-186    | 5730522E02Rik | PROMOTER               | 0.255                                           | 0.552                            | 2000.73             | 1104.89             | 0.141                            | 1605.63             | 226.18              |
| A_68_P22900662 | chr4:48552839-48552883                            | NM_001145924:-92  | 5730528L13Rik | PROMOTER               | 0.263                                           | 0.679                            | 2390.51             | 1622.23             | 0.178                            | 1855.54             | 330.55              |
| A_68_P22900663 | chr4:48552940-48552986                            | NM_028137:-408    | 5730528L13Rik | PROMOTER               | 0.239                                           | 0.632                            | 924.22              | 584.41              | 0.151                            | 784.92              | 118.41              |
| A_68_P22900664 | chr4:48553063-48553107                            | NM_028137:-286    | 5730528L13Rik | PROMOTER               | 0.357                                           | 0.645                            | 1051.86             | 678.04              | 0.230                            | 752.36              | 172.96              |
| A_68_P24084069 | chr5:129106010-129106054                          | NR_015517:530     | 5930412G12Rik | INSIDE                 | 0.582                                           | 0.549                            | 1411.44             | 774.39              | 0.319                            | 1193.13             | 381.14              |
| A_68_P24838569 | chr6:128312716-128312760                          | NR_027360:102     | 5930416I19Rik | INSIDE                 | 0.268                                           | 0.271                            | 1924.42             | 521.64              | 0.073                            | 1632.55             | 118.73              |
| A_68_P21081717 | chr2:26865712-26865756                            | NM_029862:249     | 5930434B04Rik | INSIDE                 | 0.560                                           | 0.488                            | 1458.96             | 711.61              | 0.273                            | 1037.33             | 283.46              |
| A_68_P29448465 | chr14:21522444-21522488                           | NR_029446:-145    | 6230400D17Rik | PROMOTER               | 0.306                                           | 0.636                            | 1615.46             | 1028.01             | 0.195                            | 1214.50             | 236.56              |
| A_68_P22775538 | chr4:21858442-21858486                            | NM_175234:-8      | 6230409E13Rik | PROMOTER               | 0.517                                           | 0.568                            | 1159.15             | 658.86              | 0.294                            | 1039.90             | 305.84              |
| A_68_P26812297 | chr9:107888019-107888063                          | NM_026597:207     | 6230427J02Rik | INSIDE                 | 0.370                                           | 0.566                            | 1015.81             | 574.57              | 0.209                            | 795.95              | 166.55              |
| A_68_P20876215 | chr11:182413252-182413296                         | NM_001081227:361  | 6330403A02Rik | INSIDE                 | 0.657                                           | 0.646                            | 793.94              | 512.70              | 0.425                            | 663.82              | 281.80              |
| A_68_P27904028 | chr11:70846735-70846779                           | NM_134022:363     | 6330403K07Rik | INSIDE                 | 0.649                                           | 0.578                            | 1180.96             | 682.81              | 0.376                            | 949.72              | 356.62              |
| A_68_P27904030 | chr11:70846911-70846955                           | NM_134022:187     | 6330403K07Rik | INSIDE                 | 0.401                                           | 0.439                            | 1364.46             | 599.38              | 0.176                            | 1066.17             | 187.83              |
| A_68_P24975023 | chr7:13863906-13863950                            | NM_177312:142     | 6330408A02Rik | INSIDE                 | 0.293                                           | 0.622                            | 2851.13             | 1773.84             | 0.182                            | 2030.50             | 369.65              |
| A_68_P21707651 | chr2:144353166-144353210                          | NM_172859:-54     | 6330439K17Rik | DIVERGENT_PROMOTER     | 0.304                                           | 0.336                            | 2405.03             | 808.62              | 0.102                            | 2017.05             | 206.21              |
| A_68_P25459708 | chr7:125856496-125856541                          | NM_182995:394     | 6330503K22Rik | INSIDE                 | 0.170                                           | 0.584                            | 2112.61             | 1234.70             | 0.099                            | 1517.05             | 150.82              |
| A_68_P25594223 | chr7:149557894-149557939                          | NM_177265:248     | 6330512M04Rik | INSIDE                 | 0.259                                           | 0.597                            | 1039.87             | 621.10              | 0.155                            | 751.83              | 116.47              |
| A_68_P25594227 | chr7:149558369-149558413                          | NM_177265:-226    | 6330512M04Rik | PROMOTER               | 0.362                                           | 1.697                            | 3354.54             | 5691.01             | 0.614                            | 2329.28             | 1430.01             |
| A_68_P20153981 | chr1:37486651-37486695                            | NM_198006:276     | 6330578E17Rik | INSIDE                 | 0.505                                           | 0.626                            | 2263.79             | 1417.08             | 0.316                            | 1818.64             | 575.33              |
| A_68_P28612719 | chr12:88223642-88223689                           | NM_145836:2099    | 6430527G18Rik | INSIDE                 | 0.468                                           | 0.594                            | 1052.63             | 625.27              | 0.278                            | 853.20              | 237.12              |
| A_68_P28612732 | chr12:88224969-88225013                           | NM_145836:774     | 6430527G18Rik | INSIDE                 | 0.496                                           | 0.516                            | 1454.63             | 750.69              | 0.256                            | 1240.20             | 317.14              |
| A_68_P28612738 | chr12:88225828-88225872                           | NM_145836:-86     | 6430527G18Rik | PROMOTER               | 0.207                                           | 0.417                            | 1685.17             | 702.72              | 0.086                            | 1393.89             | 120.26              |
| A_68_P28612794 | chr12:88232860-88232910                           | NM_145836:-7120   | 6430527G18Rik | PROMOTER               | 0.221                                           | 0.481                            | 4579.19             | 2202.59             | 0.106                            | 3103.89             | 330.53              |
| A_68_P28612795 | chr12:88232987-88233039                           | NM_145836:-7248   | 6430527G18Rik | PROMOTER               | 0.234                                           | 0.631                            | 1574.07             | 993.66              | 0.148                            | 1198.97             | 177.21              |
| A_68_P25581585 | chr7:147164519-147164563                          | NM_001033465:114  | 6430531B16Rik | INSIDE                 | 0.506                                           | 0.590                            | 1228.92             | 724.51              | 0.298                            | 839.09              | 250.14              |
| A_68_P26217964 | chr8:122637936-122637980                          | NM_001163762:-93  | 6430548M08Rik | PROMOTER               | 0.315                                           | 0.529                            | 2610.81             | 1379.95             | 0.166                            | 2055.91             | 341.82              |
| A_68_P26217968 | chr8:122638484-122638528                          | NM_001163762:455  | 6430548M08Rik | INSIDE                 | 0.450                                           | 0.479                            | 1376.07             | 658.56              | 0.216                            | 1101.84             | 237.56              |
| A_68_P24127313 | chr5:138182525-138182569                          | NM_175521:-1320   | 6430598A04Rik | DIVERGENT_PROMOTER     | 0.105                                           | 1.887                            | 6790.45             | 12814.33            | 0.198                            | 4405.83             | 874.09              |

| ProbeName      | Target position of probe on CpG island microarray | TargetID          | GeneSymbol    | CpG island Description | Ratio of relative methylation (TiO2-NP/Vehicle) | Sham group                       |                     |                     | TiO <sub>2</sub> -H group        |                     |                     |
|----------------|---------------------------------------------------|-------------------|---------------|------------------------|-------------------------------------------------|----------------------------------|---------------------|---------------------|----------------------------------|---------------------|---------------------|
|                |                                                   |                   |               |                        |                                                 | Relative methylation (Cy-5/Cy-3) | Cy-3 signal (Input) | Cy-5 signal (MeDIP) | Relative methylation (Cy-5/Cy-3) | Cy-3 signal (Input) | Cy-5 signal (MeDIP) |
| A_68_P24127316 | chr5:138182800-138182844                          | NM_175521:-1596   | 6430598A04Rik | DIVERGENT_PROMOTER     | 0.428                                           | 0.443                            | 1275.80             | 565.77              | 0.190                            | 1132.49             | 214.71              |
| A_68_P22398702 | chr3:105508064-105508108                          | NM_001163356:-289 | 6530418L21Rik | PROMOTER               | 0.183                                           | 0.382                            | 1991.05             | 759.84              | 0.070                            | 1677.78             | 117.45              |
| A_68_P22398705 | chr3:105508370-105508414                          | NM_001163356:17   | 6530418L21Rik | INSIDE                 | 0.129                                           | 1.684                            | 7314.69             | 12316.09            | 0.218                            | 5002.22             | 1090.55             |
| A_68_P22398706 | chr3:105508483-105508532                          | NM_001163356:132  | 6530418L21Rik | INSIDE                 | 0.070                                           | 1.990                            | 1457.80             | 2901.24             | 0.139                            | 890.76              | 123.87              |
| A_68_P24760446 | chr6:113554636-113554680                          | NM_133937:-107    | 6720456B07Rik | DIVERGENT_PROMOTER     | 0.245                                           | 0.601                            | 951.85              | 572.19              | 0.147                            | 792.84              | 116.55              |
| A_68_P24760450 | chr6:113555022-113555066                          | NM_133937:279     | 6720456B07Rik | INSIDE                 | 0.657                                           | 0.482                            | 3223.92             | 1555.53             | 0.317                            | 2566.48             | 814.00              |
| A_68_P29587990 | chr14:49065856-49065910                           | NM_172600:-144    | 6720456H20Rik | PROMOTER               | 0.089                                           | 0.709                            | 2798.46             | 1982.78             | 0.063                            | 1907.49             | 120.25              |
| A_68_P24618848 | chr6:87863953-87863997                            | NM_173737:5       | 8430410A17Rik | INSIDE                 | 0.560                                           | 0.378                            | 2092.85             | 790.05              | 0.211                            | 1739.85             | 367.76              |
| A_68_P24865610 | chr6:135148284-135148328                          | NM_028982:302     | 8430419L09Rik | INSIDE                 | 0.312                                           | 0.588                            | 7845.62             | 4616.42             | 0.183                            | 5418.44             | 993.91              |
| A_68_P24865611 | chr6:135148370-135148414                          | NM_028982:388     | 8430419L09Rik | INSIDE                 | 0.260                                           | 0.604                            | 1708.37             | 1032.67             | 0.157                            | 1212.46             | 190.53              |
| A_68_P21754949 | chr2:153269590-153269634                          | NM_001001986:603  | 8430427H17Rik | INSIDE                 | 0.218                                           | 0.518                            | 3142.39             | 1629.16             | 0.113                            | 2335.58             | 264.12              |
| A_68_P21755509 | chr2:153355180-153355224                          | NM_001134300:505  | 8430427H17Rik | INSIDE                 | 0.303                                           | 0.536                            | 4321.53             | 2314.36             | 0.162                            | 3184.50             | 517.36              |
| A_68_P21755516 | chr2:153356263-153356307                          | NM_001134300:-577 | 8430427H17Rik | PROMOTER               | 0.456                                           | 0.516                            | 1139.99             | 587.97              | 0.235                            | 889.87              | 209.24              |
| A_68_P27085192 | chr10:40403058-40403102                           | NM_177793:-7      | 9030224M15Rik | PROMOTER               | 0.547                                           | 0.682                            | 1325.94             | 904.47              | 0.373                            | 1157.92             | 431.89              |
| A_68_P25459894 | chr7:125884088-125884134                          | NM_027815:326     | 9030624J02Rik | INSIDE                 | 0.176                                           | 0.618                            | 3105.32             | 1918.00             | 0.109                            | 2116.17             | 230.08              |
| A_68_P31177904 | chr17:41016953-41016997                           | NM_027834:533     | 9130008F23Rik | INSIDE                 | 0.253                                           | 0.499                            | 1212.22             | 604.69              | 0.126                            | 944.15              | 119.26              |
| A_68_P32141578 | chr19:46073169-46073219                           | NM_198296:-216    | 9130011E15Rik | DIVERGENT_PROMOTER     | 0.364                                           | 0.540                            | 1105.89             | 596.97              | 0.197                            | 794.71              | 156.33              |
| A_68_P25962138 | chr8:75094798-75094842                            | NM_172396:127     | 9130011J15Rik | INSIDE                 | 0.423                                           | 0.533                            | 1353.42             | 721.20              | 0.225                            | 960.95              | 216.45              |
| A_68_P24463220 | chr6:54379822-54379866                            | NR_033635:371     | 9130019P16Rik | INSIDE                 | 0.171                                           | 0.493                            | 1713.98             | 844.41              | 0.084                            | 1433.43             | 120.68              |
| A_68_P25509653 | chr7:135381206-135381250                          | NM_177001:317     | 9130023H24Rik | INSIDE                 | 0.153                                           | 0.636                            | 2384.71             | 1516.26             | 0.097                            | 1502.10             | 145.82              |
| A_68_P25509654 | chr7:135381359-135381407                          | NM_177001:163     | 9130023H24Rik | INSIDE                 | 0.297                                           | 0.455                            | 3341.32             | 1521.88             | 0.135                            | 2245.49             | 303.74              |
| A_68_P25509657 | chr7:135381773-135381817                          | NM_177001:-249    | 9130023H24Rik | PROMOTER               | 0.634                                           | 0.692                            | 2857.26             | 1976.81             | 0.439                            | 2169.56             | 952.30              |
| A_68_P20250392 | chr1:57028581-57028634                            | NR_024325:295     | 9130024F11Rik | INSIDE                 | 0.016                                           | 3.220                            | 3574.32             | 11508.11            | 0.052                            | 2359.54             | 121.70              |
| A_68_P23693366 | chr5:52581910-52581954                            | NR_015537:13      | 9230114K14Rik | INSIDE                 | 0.246                                           | 0.669                            | 895.12              | 599.22              | 0.164                            | 748.74              | 123.07              |
| A_68_P30475231 | chr15:98397707-98397751                           | NR_028442:-26     | 9330020H09Rik | PROMOTER               | 0.603                                           | 0.522                            | 2177.89             | 1136.61             | 0.315                            | 1624.71             | 511.56              |
| A_68_P21782538 | chr2:158186969-158187016                          | NR_015463:253     | 9430008C03Rik | INSIDE                 | 0.294                                           | 0.433                            | 1475.14             | 638.46              | 0.127                            | 1038.55             | 132.14              |
| A_68_P21782540 | chr2:158187149-158187193                          | NR_015463:75      | 9430008C03Rik | INSIDE                 | 0.361                                           | 0.611                            | 1703.82             | 1041.43             | 0.221                            | 1310.07             | 289.15              |
| A_68_P23442482 | chr4:155484180-155484224                          | NM_145557:96      | 9430015G10Rik | INSIDE                 | 0.409                                           | 0.431                            | 1382.21             | 595.85              | 0.176                            | 1104.16             | 194.66              |
| A_68_P20252945 | chr1:57463017-57463061                            | NM_001081181:-353 | 9430016H08Rik | PROMOTER               | 0.465                                           | 0.573                            | 1971.74             | 1129.97             | 0.266                            | 1549.91             | 413.03              |
| A_68_P31464038 | chr18:4635009-4635053                             | NM_001081963:104  | 9430020K01Rik | INSIDE                 | 0.496                                           | 0.512                            | 3171.82             | 1624.49             | 0.254                            | 2380.57             | 605.03              |
| A_68_P24455804 | chr6:53237462-53237506                            | NR_015553:196     | 9430076C15Rik | INSIDE                 | 0.362                                           | 0.441                            | 1507.71             | 665.62              | 0.160                            | 1198.21             | 191.54              |
| A_68_P24455806 | chr6:53237701-53237745                            | NR_015553:434     | 9430076C15Rik | INSIDE                 | 0.239                                           | 0.670                            | 2243.97             | 1503.01             | 0.160                            | 1827.15             | 292.91              |
| A_68_P24455810 | chr6:53238161-53238205                            | NR_015553:894     | 9430076C15Rik | INSIDE                 | 0.594                                           | 0.428                            | 1853.46             | 793.26              | 0.254                            | 1447.77             | 367.84              |
| A_68_P24648066 | chr6:92893011-92893055                            | NR_015530:2457    | 9530026P05Rik | INSIDE                 | 0.384                                           | 0.659                            | 1940.02             | 1277.78             | 0.253                            | 1367.67             | 346.12              |
| A_68_P24648067 | chr6:92893117-92893161                            | NR_015530:2563    | 9530026P05Rik | INSIDE                 | 0.146                                           | 0.552                            | 2239.11             | 1235.64             | 0.081                            | 1714.78             | 138.49              |
| A_68_P23562834 | chr5:28785352-28785396                            | NR_015562:-8149   | 9530036O11Rik | PROMOTER               | 0.445                                           | 0.664                            | 5162.24             | 3429.44             | 0.296                            | 3919.25             | 1159.80             |
| A_68_P23562892 | chr5:28791826-28791870                            | NR_015562:-1675   | 9530036O11Rik | PROMOTER               | 0.331                                           | 0.402                            | 1583.43             | 637.04              | 0.133                            | 1415.85             | 188.76              |
| A_68_P24830747 | chr6:127059111-127059169                          | NM_177003:430     | 9630033F20Rik | INSIDE                 | 0.489                                           | 0.628                            | 1497.81             | 940.76              | 0.307                            | 1301.40             | 399.40              |
| A_68_P25286562 | chr7:91234889-91234933                            | NM_030728:105     | 9930013L23Rik | INSIDE                 | 0.447                                           | 0.527                            | 1669.55             | 879.18              | 0.235                            | 1386.10             | 326.40              |
| A_68_P25286566 | chr7:91235318-91235362                            | NM_030728:-325    | 9930013L23Rik | PROMOTER               | 0.347                                           | 0.623                            | 1614.11             | 1006.39             | 0.216                            | 1140.03             | 246.58              |
| A_68_P30261318 | chr15:60654478-60654526                           | NR_030696:-17     | 9930014A18Rik | PROMOTER               | 0.272                                           | 0.528                            | 1085.91             | 572.91              | 0.144                            | 840.37              | 120.70              |
| A_68_P30261322 | chr15:60654906-60654950                           | NR_030696:409     | 9930014A18Rik | INSIDE                 | 0.320                                           | 1.433                            | 1224.73             | 1755.61             | 0.458                            | 1001.38             | 458.70              |
| A_68_P30261323 | chr15:60655040-60655084                           | NR_030696:543     | 9930014A18Rik | INSIDE                 | 0.616                                           | 0.454                            | 1534.45             | 696.58              | 0.280                            | 1241.21             | 347.00              |
| A_68_P32054913 | chr19:29879873-29879917                           | NM_172836:605     | 9930021J03Rik | INSIDE                 | 0.538                                           | 0.475                            | 2404.99             | 1143.19             | 0.256                            | 1820.32             | 465.54              |

| ProbeName      | Target position of probe on CpG island microarray | TargetID           | GeneSymbol    | CpG island Description | Ratio of relative methylation (TiO2-NP/Vehicle) | Sham group                       |                     |                     | TiO <sub>2</sub> -H group        |                     |                     |
|----------------|---------------------------------------------------|--------------------|---------------|------------------------|-------------------------------------------------|----------------------------------|---------------------|---------------------|----------------------------------|---------------------|---------------------|
|                |                                                   |                    |               |                        |                                                 | Relative methylation (Cy-5/Cy-3) | Cy-3 signal (Input) | Cy-5 signal (MeDIP) | Relative methylation (Cy-5/Cy-3) | Cy-3 signal (Input) | Cy-5 signal (MeDIP) |
| A_68_P32054915 | chr19:29880098-29880142                           | NM_172836:379      | 9930021J03Rik | INSIDE                 | 0.555                                           | 0.614                            | 866.77              | 532.58              | 0.341                            | 733.85              | 250.22              |
| A_68_P23271163 | chr4:124614216-124614260                          | NM_177573:-53      | 9930104L06Rik | DIVERGENT_PROMOTER     | 0.640                                           | 0.656                            | 1168.39             | 766.73              | 0.420                            | 927.63              | 389.38              |
| A_68_P27894430 | chr11:69154065-69154109                           | NR_027827:-184     | A030009H04Rik | PROMOTER               | 0.460                                           | 0.634                            | 885.96              | 561.45              | 0.291                            | 805.19              | 234.60              |
| A_68_P20947700 | chr1:194999554-194999598                          | NM_001160360:-86   | A130010J15Rik | PROMOTER               | 0.253                                           | 0.501                            | 1101.04             | 551.61              | 0.127                            | 906.35              | 114.75              |
| A_68_P20935795 | chr1:192849358-192849402                          | NR_027298:151      | A230020J21Rik | INSIDE                 | 0.499                                           | 0.543                            | 1577.88             | 856.18              | 0.271                            | 1289.41             | 348.96              |
| A_68_P20935796 | chr1:192849520-192849564                          | NR_027298:313      | A230020J21Rik | INSIDE                 | 0.335                                           | 0.455                            | 1278.55             | 582.32              | 0.153                            | 988.28              | 150.85              |
| A_68_P27835193 | chr11:58977324-58977368                           | NM_173785:-102     | A230051G13Rik | PROMOTER               | 0.641                                           | 0.710                            | 1345.47             | 955.91              | 0.456                            | 1036.07             | 472.19              |
| A_68_P29964259 | chr14:123312516-123312560                         | NM_145466:-151     | A2ld1         | PROMOTER               | 0.240                                           | 0.412                            | 3027.30             | 1246.68             | 0.099                            | 2385.40             | 236.01              |
| A_68_P23456811 | chr5:5664103-5664147                              | NM_172447:108      | A330021E22Rik | INSIDE                 | 0.362                                           | 0.682                            | 1203.11             | 820.16              | 0.247                            | 905.36              | 223.21              |
| A_68_P23456813 | chr5:5664349-5664400                              | NM_172447:-142     | A330021E22Rik | PROMOTER               | 0.125                                           | 0.695                            | 1930.87             | 1342.01             | 0.087                            | 1419.02             | 123.07              |
| A_68_P31961512 | chr19:12670749-12670793                           | NR_015503:286      | A330040F15Rik | INSIDE                 | 0.651                                           | 0.371                            | 1868.62             | 693.37              | 0.242                            | 1442.61             | 348.69              |
| A_68_P23293015 | chr4:128444743-128444787                          | NM_001009819:8263  | A3galt2       | INSIDE                 | 0.614                                           | 2.437                            | 1056.13             | 2573.32             | 1.495                            | 898.87              | 1343.67             |
| A_68_P30387340 | chr15:83081767-83081811                           | NM_001170954:373   | A4galt        | INSIDE                 | 0.639                                           | 0.488                            | 1467.01             | 715.23              | 0.311                            | 1375.72             | 428.41              |
| A_68_P31145426 | chr17:32533638-32533682                           | NR_029458:-6298    | A530088E08Rik | PROMOTER               | 0.250                                           | 0.616                            | 890.06              | 548.63              | 0.154                            | 770.84              | 118.86              |
| A_68_P26920085 | chr14:7382878-7382922                             | NR_030698:-268     | A630066F11Rik | PROMOTER               | 0.623                                           | 0.672                            | 1249.75             | 840.30              | 0.419                            | 1076.44             | 450.76              |
| A_68_P26920089 | chr10:7383225-7383269                             | NR_030698:78       | A630066F11Rik | INSIDE                 | 0.292                                           | 0.506                            | 2660.02             | 1345.58             | 0.148                            | 2036.56             | 300.51              |
| A_68_P28178207 | chr11:119352476-119352520                         | NM_001164636:-162  | A730011L01Rik | PROMOTER               | 0.386                                           | 0.699                            | 1368.51             | 957.09              | 0.270                            | 1069.81             | 288.84              |
| A_68_P21632193 | chr2:130732022-130732066                          | NR_015523:88       | A730017L22Rik | INSIDE                 | 0.487                                           | 0.448                            | 1208.61             | 540.95              | 0.218                            | 986.16              | 214.80              |
| A_68_P28202319 | chr12:4776061-4776106                             | NM_175431:-10      | A830093I24Rik | DIVERGENT_PROMOTER     | 0.271                                           | 0.645                            | 1217.67             | 785.47              | 0.175                            | 1011.27             | 177.06              |
| A_68_P31112025 | chr17:26853064-26853108                           | NM_029870:492      | A930001N09Rik | INSIDE                 | 0.552                                           | 0.575                            | 2484.45             | 1428.84             | 0.317                            | 2103.29             | 667.25              |
| A_68_P32053384 | chr19:29596371-29596418                           | NR_015567:83       | A930007I19Rik | INSIDE                 | 0.473                                           | 0.570                            | 972.26              | 554.23              | 0.269                            | 784.74              | 211.41              |
| A_68_P21487320 | chr2:103963515-103963559                          | NM_026634:611      | A930018P22Rik | INSIDE                 | 0.213                                           | 0.547                            | 1711.64             | 936.35              | 0.116                            | 1350.53             | 157.27              |
| A_68_P27081279 | chr10:39618779-39618823                           | NR_033628:244      | AA474331      | INSIDE                 | 0.444                                           | 0.601                            | 1486.98             | 893.63              | 0.267                            | 1342.12             | 357.96              |
| A_68_P21071433 | chr2:25187978-25188029                            | NR_027448:88       | AA543186      | INSIDE                 | 0.205                                           | 0.617                            | 1139.84             | 703.03              | 0.127                            | 937.15              | 118.60              |
| A_68_P24067080 | chr5:125956003-125956050                          | NM_030210:-216     | Aacs          | PROMOTER               | 0.245                                           | 0.484                            | 1225.23             | 593.39              | 0.119                            | 1006.51             | 119.61              |
| A_68_P20347693 | chr1:74331033-74331077                            | NM_001190444:258   | Aamp          | INSIDE                 | 0.280                                           | 0.431                            | 1648.02             | 710.43              | 0.121                            | 1313.97             | 158.37              |
| A_68_P30214224 | chr15:51871601-51871645                           | NM_175503:-30      | Aard          | PROMOTER               | 0.584                                           | 0.646                            | 1498.65             | 967.89              | 0.377                            | 1408.32             | 531.36              |
| A_68_P30214228 | chr15:51872101-51872145                           | NM_175503:470      | Aard          | INSIDE                 | 0.356                                           | 0.516                            | 1477.57             | 762.35              | 0.183                            | 1221.35             | 224.04              |
| A_68_P31201455 | chr17:45643843-45643887                           | NM_198608:75       | Aars2         | INSIDE                 | 0.372                                           | 0.561                            | 1362.30             | 763.95              | 0.209                            | 1028.70             | 214.79              |
| A_68_P28073762 | chr11:101278541-101278585                         | NM_144829:185      | Aarsd1        | INSIDE                 | 0.588                                           | 0.663                            | 2841.75             | 1882.70             | 0.389                            | 2252.20             | 876.80              |
| A_68_P28181983 | chr11:119908193-119908237                         | NM_001198787:-5119 | Aatk          | PROMOTER               | 0.560                                           | 0.701                            | 2711.60             | 1901.38             | 0.393                            | 2101.40             | 825.63              |
| A_68_P22921610 | chr4:53173018-53173062                            | NM_013454:-273     | Abca1         | PROMOTER               | 0.149                                           | 0.597                            | 1907.07             | 1138.50             | 0.089                            | 1345.39             | 119.70              |
| A_68_P31096791 | chr17:24489119-24489163                           | NM_001039581:150   | Abca3         | INSIDE                 | 0.503                                           | 0.575                            | 1359.48             | 781.13              | 0.289                            | 1045.09             | 302.20              |
| A_68_P24059260 | chr5:124540242-124540286                          | NM_019875:5543     | Abcb9         | INSIDE                 | 0.648                                           | 2.562                            | 3085.29             | 7904.10             | 1.661                            | 2247.29             | 3731.71             |
| A_68_P29940450 | chr14:119105251-119105295                         | NM_001033336:169   | Abcc4         | INSIDE                 | 0.302                                           | 0.501                            | 1987.26             | 995.31              | 0.151                            | 1713.82             | 259.17              |
| A_68_P29940453 | chr14:119105644-119105689                         | NM_001033336:-225  | Abcc4         | PROMOTER               | 0.388                                           | 0.553                            | 937.89              | 518.53              | 0.215                            | 799.90              | 171.59              |
| A_68_P30587615 | chr16:20426603-20426647                           | NM_013790:-157     | Abcc5         | PROMOTER               | 0.215                                           | 0.631                            | 1192.94             | 752.32              | 0.136                            | 911.87              | 123.67              |
| A_68_P25097406 | chr7:53435172-53435216                            | NM_011510:209      | Abcc8         | INSIDE                 | 0.233                                           | 1.709                            | 815.63              | 1393.61             | 0.397                            | 472.43              | 187.76              |
| A_68_P23542799 | chr5:24082860-24082904                            | NM_001190443:403   | Abcf2         | INSIDE                 | 0.350                                           | 0.633                            | 2273.51             | 1438.78             | 0.221                            | 1579.81             | 349.76              |
| A_68_P23542801 | chr5:24083043-24083087                            | NM_001190443:221   | Abcf2         | INSIDE                 | 0.630                                           | 0.639                            | 2154.11             | 1376.27             | 0.403                            | 1492.52             | 601.00              |
| A_68_P24482545 | chr6:58590224-58590281                            | NM_011920:43587    | Abcg2         | INSIDE                 | 0.154                                           | 0.712                            | 1539.68             | 1095.49             | 0.109                            | 1144.30             | 125.11              |
| A_68_P31406130 | chr17:85075448-85075492                           | NM_031884:6793     | Abcg5         | INSIDE                 | 0.463                                           | 0.464                            | 1145.15             | 530.85              | 0.215                            | 984.79              | 211.54              |
| A_68_P31406131 | chr17:85075545-85075589                           | NM_031884:6697     | Abcg5         | INSIDE                 | 0.619                                           | 0.430                            | 1248.70             | 537.12              | 0.266                            | 968.77              | 257.85              |
| A_68_P24114259 | chr5:135484848-135484896                          | NM_001190437:-149  | Abhd11        | DIVERGENT_PROMOTER     | 0.196                                           | 0.630                            | 1325.81             | 834.96              | 0.123                            | 990.99              | 122.26              |

| ProbeName      | Target position of probe on CpG island microarray | TargetID          | GeneSymbol | CpG island Description | Ratio of relative methylation (TiO2-NP/Vehicle) | Sham group                       |                     |                     | TiO <sub>2</sub> -H group        |                     |                     |
|----------------|---------------------------------------------------|-------------------|------------|------------------------|-------------------------------------------------|----------------------------------|---------------------|---------------------|----------------------------------|---------------------|---------------------|
|                |                                                   |                   |            |                        |                                                 | Relative methylation (Cy-5/Cy-3) | Cy-3 signal (Input) | Cy-5 signal (MeDIP) | Relative methylation (Cy-5/Cy-3) | Cy-3 signal (Input) | Cy-5 signal (MeDIP) |
| A_68_P24114260 | chr5:135484941-135484991                          | NM_001190437:-55  | Abhd11     | DIVERGENT_PROMOTER     | 0.244                                           | 0.474                            | 1464.32             | 694.49              | 0.116                            | 1000.99             | 115.94              |
| A_68_P24114264 | chr5:135485504-135485548                          | NR_033794:201     | Abhd11     | INSIDE                 | 0.508                                           | 0.669                            | 1282.03             | 857.73              | 0.340                            | 938.05              | 318.73              |
| A_68_P24114265 | chr5:135485654-135485698                          | NR_033794:351     | Abhd11     | INSIDE                 | 0.574                                           | 0.617                            | 1223.70             | 754.79              | 0.354                            | 885.51              | 313.72              |
| A_68_P21741660 | chr2:150730004-150730048                          | NM_024465:441     | Abhd12     | INSIDE                 | 0.522                                           | 0.663                            | 3093.69             | 2050.35             | 0.346                            | 2373.54             | 821.67              |
| A_68_P21741662 | chr2:150730240-150730284                          | NM_024465:205     | Abhd12     | INSIDE                 | 0.560                                           | 0.552                            | 1913.46             | 1055.45             | 0.309                            | 1584.74             | 489.26              |
| A_68_P25645837 | chr8:9978074-9978118                              | NM_001081119:380  | Abhd13     | INSIDE                 | 0.231                                           | 0.627                            | 931.50              | 584.18              | 0.145                            | 819.22              | 118.56              |
| A_68_P27938080 | chr11:77329296-77329340                           | NM_026185:700     | Abhd15     | INSIDE                 | 0.369                                           | 0.522                            | 1318.57             | 687.90              | 0.193                            | 1028.42             | 198.06              |
| A_68_P31491180 | chr18:10707044-10707088                           | NM_134130:-372    | Abhd3      | PROMOTER               | 0.344                                           | 0.673                            | 2149.10             | 1445.60             | 0.232                            | 1657.30             | 383.91              |
| A_68_P26888898 | chr9:122261191-122261235                          | NM_026179:479     | Abhd5      | INSIDE                 | 0.548                                           | 0.475                            | 1220.49             | 580.11              | 0.260                            | 1149.07             | 299.21              |
| A_68_P29387299 | chr14:8835518-8835562                             | NM_025341:125     | Abhd6      | INSIDE                 | 0.496                                           | 0.496                            | 1829.45             | 908.22              | 0.246                            | 1383.90             | 341.01              |
| A_68_P25956918 | chr8:73987077-73987121                            | NM_022419:458     | Abhd8      | INSIDE                 | 0.263                                           | 0.510                            | 1074.65             | 548.49              | 0.134                            | 913.13              | 122.63              |
| A_68_P21061191 | chr2:22895186-22895230                            | NM_001077190:552  | Abi1       | INSIDE                 | 0.544                                           | 0.528                            | 1339.40             | 707.62              | 0.287                            | 1188.33             | 341.57              |
| A_68_P21061195 | chr2:22895595-22895639                            | NM_001077190:144  | Abi1       | INSIDE                 | 0.207                                           | 0.689                            | 1127.46             | 777.11              | 0.143                            | 843.87              | 120.53              |
| A_68_P21110672 | chr2:31543979-31544023                            | NM_001112703:-75  | Abi1       | PROMOTER               | 0.426                                           | 0.339                            | 2003.50             | 680.11              | 0.144                            | 1675.62             | 242.06              |
| A_68_P27932045 | chr11:76250435-76250479                           | NM_198018:72465   | Abr        | INSIDE                 | 0.271                                           | 0.626                            | 3404.65             | 2130.45             | 0.169                            | 2601.46             | 440.86              |
| A_68_P27932458 | chr11:76308565-76308609                           | NM_198018:14335   | Abr        | INSIDE                 | 0.563                                           | 0.513                            | 1670.04             | 856.81              | 0.289                            | 1335.96             | 385.79              |
| A_68_P27932871 | chr11:76384753-76384797                           | NM_198895:102     | Abr        | INSIDE                 | 0.368                                           | 0.676                            | 4400.34             | 2973.23             | 0.248                            | 3399.93             | 844.40              |
| A_68_P28881306 | chr13:23515429-23515473                           | NM_013924:285     | Abt1       | INSIDE                 | 0.486                                           | 0.501                            | 1304.49             | 654.11              | 0.244                            | 1021.46             | 249.03              |
| A_68_P24624507 | chr6:88792017-88792061                            | NM_030251:-109    | Abtb1      | PROMOTER               | 0.220                                           | 1.629                            | 9945.62             | 16204.31            | 0.358                            | 6894.62             | 2468.28             |
| A_68_P24624508 | chr6:88792125-88792169                            | NM_030251:-217    | Abtb1      | PROMOTER               | 0.423                                           | 3.214                            | 16049.16            | 51578.49            | 1.361                            | 9621.76             | 13091.91            |
| A_68_P24624509 | chr6:88792201-88792245                            | NM_030251:-293    | Abtb1      | PROMOTER               | 0.174                                           | 1.570                            | 5082.42             | 7978.09             | 0.273                            | 3210.12             | 876.93              |
| A_68_P21483985 | chr2:103406320-103406364                          | NM_178890:-124    | Abtb2      | PROMOTER               | 0.179                                           | 1.477                            | 3797.96             | 5609.94             | 0.264                            | 2414.63             | 638.31              |
| A_68_P26870853 | chr9:119066197-119066250                          | NM_146230:-12     | Acaa1b     | PROMOTER               | 0.307                                           | 0.623                            | 1274.20             | 793.86              | 0.191                            | 1075.27             | 205.65              |
| A_68_P31833164 | chr18:74938725-74938769                           | NM_177470:-119    | Acaa2      | DIVERGENT_PROMOTER     | 0.241                                           | 0.502                            | 2606.13             | 1308.81             | 0.121                            | 1781.96             | 215.91              |
| A_68_P31833165 | chr18:74938885-74938929                           | NM_177470:41      | Acaa2      | INSIDE                 | 0.291                                           | 0.576                            | 3477.89             | 2001.80             | 0.168                            | 2416.86             | 404.97              |
| A_68_P26373431 | chr9:26806964-26807008                            | NM_025862:148     | Acad8      | INSIDE                 | 0.137                                           | 0.474                            | 2559.24             | 1211.87             | 0.065                            | 1811.77             | 117.56              |
| A_68_P24007906 | chr5:115568969-115569013                          | NM_007383:332     | Acads      | INSIDE                 | 0.286                                           | 1.430                            | 1816.65             | 2597.95             | 0.409                            | 1297.06             | 531.05              |
| A_68_P24007907 | chr5:115569084-115569128                          | NM_007383:216     | Acads      | INSIDE                 | 0.295                                           | 0.630                            | 2283.44             | 1438.67             | 0.186                            | 1678.89             | 311.69              |
| A_68_P25258775 | chr7:86198137-86198181                            | NM_007424:-210    | Acan       | PROMOTER               | 0.273                                           | 0.563                            | 2377.74             | 1339.81             | 0.154                            | 1854.72             | 285.27              |
| A_68_P30646211 | chr16:31200561-31200605                           | NM_030138:742     | Acap2      | INSIDE                 | 0.456                                           | 0.483                            | 2455.17             | 1186.49             | 0.220                            | 1973.96             | 434.60              |
| A_68_P31055160 | chr17:13153437-13153481                           | NM_009338:133     | Acat2      | INSIDE                 | 0.654                                           | 0.483                            | 1171.71             | 566.14              | 0.316                            | 1001.83             | 316.34              |
| A_68_P31055162 | chr17:13153233-13153278                           | NM_009338:336     | Acat2      | INSIDE                 | 0.318                                           | 0.538                            | 1930.12             | 1038.46             | 0.171                            | 1383.85             | 236.51              |
| A_68_P20877471 | chr1:182656470-182656514                          | NM_133225:319     | Acbd3      | INSIDE                 | 0.602                                           | 0.472                            | 2000.22             | 943.87              | 0.284                            | 1672.07             | 474.65              |
| A_68_P21061281 | chr2:22923971-22924015                            | NM_001102437:-599 | Acbd5      | PROMOTER               | 0.304                                           | 0.505                            | 1195.66             | 604.01              | 0.154                            | 906.21              | 139.11              |
| A_68_P21061285 | chr2:22924459-22924503                            | NM_001102437:-111 | Acbd5      | PROMOTER               | 0.570                                           | 0.701                            | 2070.25             | 1452.17             | 0.400                            | 1512.58             | 604.66              |
| A_68_P21061287 | chr2:22924684-22924728                            | NM_001102437:115  | Acbd5      | INSIDE                 | 0.154                                           | 1.430                            | 5212.07             | 7455.00             | 0.220                            | 3718.61             | 816.61              |
| A_68_P21061288 | chr2:22924783-22924828                            | NM_001102437:214  | Acbd5      | INSIDE                 | 0.024                                           | 1.918                            | 4351.38             | 8347.05             | 0.045                            | 2834.50             | 128.16              |
| A_68_P27958467 | chr11:80965329-80965373                           | NM_007384:1055    | Acen1      | INSIDE                 | 0.478                                           | 0.656                            | 1189.57             | 779.90              | 0.313                            | 1067.78             | 334.62              |
| A_68_P27958470 | chr11:80965747-80965791                           | NM_007384:637     | Acen1      | INSIDE                 | 0.389                                           | 0.643                            | 2651.27             | 1705.25             | 0.250                            | 2029.90             | 507.65              |
| A_68_P27958481 | chr11:80966909-80966953                           | NM_007384:-525    | Acen1      | PROMOTER               | 0.587                                           | 0.530                            | 1433.96             | 760.52              | 0.311                            | 1131.20             | 352.29              |
| A_68_P25354923 | chr7:105457417-105457461                          | NM_025408:599     | Acer3      | INSIDE                 | 0.444                                           | 0.693                            | 1705.31             | 1181.82             | 0.308                            | 1299.88             | 399.96              |
| A_68_P24124950 | chr5:137730313-137730357                          | NM_009599:830     | Ache       | INSIDE                 | 0.265                                           | 0.678                            | 2136.29             | 1447.55             | 0.179                            | 1641.91             | 294.45              |
| A_68_P29613712 | chr14:55305381-55305425                           | NM_001085473:366  | Acin1      | INSIDE                 | 0.333                                           | 0.693                            | 1185.67             | 821.88              | 0.231                            | 961.80              | 222.15              |
| A_68_P29613716 | chr14:55305799-55305843                           | NM_001085473:-52  | Acin1      | PROMOTER               | 0.571                                           | 0.413                            | 2027.70             | 837.31              | 0.236                            | 1701.80             | 400.98              |

| ProbeName      | Target position of probe on CpG island microarray | TargetID           | GeneSymbol | CpG island Description | Ratio of relative methylation (TiO2-NP/Vehicle) | Sham group                       |                     |                     | TiO <sub>2</sub> -H group        |                     |                     |
|----------------|---------------------------------------------------|--------------------|------------|------------------------|-------------------------------------------------|----------------------------------|---------------------|---------------------|----------------------------------|---------------------|---------------------|
|                |                                                   |                    |            |                        |                                                 | Relative methylation (Cy-5/Cy-3) | Cy-3 signal (Input) | Cy-5 signal (MeDIP) | Relative methylation (Cy-5/Cy-3) | Cy-3 signal (Input) | Cy-5 signal (MeDIP) |
| A_68_P28068583 | chr11:100389102-100389146                         | NM_001199296:190   | Acly       | INSIDE                 | 0.195                                           | 0.399                            | 1972.04             | 787.31              | 0.078                            | 1513.68             | 118.02              |
| A_68_P28068584 | chr11:100389186-100389230                         | NM_001199296:106   | Acly       | INSIDE                 | 0.359                                           | 0.592                            | 1045.30             | 618.30              | 0.212                            | 773.14              | 164.29              |
| A_68_P24219278 | chr6:6906039-6906086                              | NM_001077713:45    | Acn9       | INSIDE                 | 0.373                                           | 0.491                            | 1636.84             | 803.46              | 0.183                            | 1192.51             | 218.16              |
| A_68_P30380158 | chr15:81702740-81702784                           | NM_080633:-130     | Aco2       | DIVERGENT_PROMOTER     | 0.346                                           | 0.562                            | 1716.09             | 963.94              | 0.195                            | 1293.49             | 251.63              |
| A_68_P30380159 | chr15:81702880-81702926                           | NM_080633:10       | Aco2       | INSIDE                 | 0.285                                           | 0.550                            | 1078.74             | 593.74              | 0.157                            | 764.99              | 119.88              |
| A_68_P23417005 | chr4:151552435-151552479                          | NM_001146057:-7786 | Acot7      | PROMOTER               | 0.542                                           | 0.278                            | 2371.44             | 659.43              | 0.151                            | 1876.67             | 282.61              |
| A_68_P23417006 | chr4:151552589-151552633                          | NM_001146057:-7632 | Acot7      | PROMOTER               | 0.328                                           | 0.435                            | 1700.38             | 738.82              | 0.143                            | 1283.70             | 183.01              |
| A_68_P32759042 | chrX:151697320-151697364                          | NM_019736:300      | Acot9      | INSIDE                 | 0.224                                           | 1.545                            | 1448.06             | 2236.73             | 0.347                            | 587.84              | 203.70              |
| A_68_P21421302 | chr2:91042978-91043022                            | NM_007387:-68      | Acp2       | DIVERGENT_PROMOTER     | 0.469                                           | 0.553                            | 1544.97             | 853.77              | 0.259                            | 1194.36             | 309.42              |
| A_68_P22353007 | chr3:96962730-96962774                            | NM_019800:53       | Acp6       | INSIDE                 | 0.234                                           | 0.698                            | 1586.71             | 1107.81             | 0.164                            | 1317.97             | 215.73              |
| A_68_P26749713 | chr9:96789331-96789375                            | NM_153420:489      | Acp12      | INSIDE                 | 0.358                                           | 0.567                            | 1211.53             | 687.33              | 0.203                            | 931.50              | 189.06              |
| A_68_P26749716 | chr9:96789602-96789646                            | NM_153420:217      | Acp12      | INSIDE                 | 0.365                                           | 0.604                            | 8480.39             | 5122.60             | 0.220                            | 5920.23             | 1304.23             |
| A_68_P26749722 | chr9:96790253-96790298                            | NM_153420:-434     | Acp12      | PROMOTER               | 0.519                                           | 0.510                            | 1346.84             | 687.13              | 0.265                            | 990.00              | 261.93              |
| A_68_P26235836 | chr8:125299500-125299544                          | NM_144932:118      | Acsf3      | INSIDE                 | 0.269                                           | 1.433                            | 3955.96             | 5667.01             | 0.386                            | 2719.70             | 1048.79             |
| A_68_P26235837 | chr8:125299586-125299630                          | NM_144932:204      | Acsf3      | INSIDE                 | 0.142                                           | 0.632                            | 1690.76             | 1068.31             | 0.090                            | 1295.99             | 116.19              |
| A_68_P26235838 | chr8:125299671-125299715                          | NM_144932:288      | Acsf3      | INSIDE                 | 0.497                                           | 0.634                            | 879.09              | 557.22              | 0.315                            | 751.30              | 236.47              |
| A_68_P27809324 | chr11:54117377-54117421                           | NM_001033597:-307  | Acs16      | PROMOTER               | 0.243                                           | 0.597                            | 2608.15             | 1556.32             | 0.145                            | 1796.55             | 260.30              |
| A_68_P27809329 | chr11:54117906-54117950                           | NM_001033597:223   | Acs16      | INSIDE                 | 0.380                                           | 0.691                            | 3018.23             | 2086.45             | 0.262                            | 2417.92             | 634.67              |
| A_68_P21766024 | chr2:155343697-155343741                          | NM_019811:-60      | Acss2      | DIVERGENT_PROMOTER     | 0.182                                           | 0.528                            | 1762.34             | 931.09              | 0.096                            | 1473.68             | 141.61              |
| A_68_P26242184 | chr8:126416045-126416089                          | NM_009606:2570     | Acta1      | INSIDE                 | 0.279                                           | 0.610                            | 4222.33             | 2574.56             | 0.170                            | 3074.41             | 523.07              |
| A_68_P28574814 | chr12:81360288-81360334                           | NM_134156:1048     | Actn1      | INSIDE                 | 0.315                                           | 0.606                            | 2559.63             | 1550.15             | 0.191                            | 1984.65             | 378.58              |
| A_68_P28574815 | chr12:81360407-81360451                           | NM_134156:930      | Actn1      | INSIDE                 | 0.588                                           | 0.558                            | 1566.46             | 874.72              | 0.328                            | 1291.53             | 423.94              |
| A_68_P25024594 | chr7:29747163-29747207                            | NM_021895:115      | Actn4      | INSIDE                 | 0.645                                           | 0.570                            | 1895.95             | 1081.05             | 0.368                            | 1565.62             | 575.77              |
| A_68_P32143651 | chr19:46469679-46469723                           | NM_016860:525      | Actr1a     | INSIDE                 | 0.280                                           | 0.608                            | 1106.56             | 672.40              | 0.170                            | 919.00              | 156.10              |
| A_68_P32143656 | chr19:46470216-46470260                           | NM_016860:-13      | Actr1a     | DIVERGENT_PROMOTER     | 0.644                                           | 0.418                            | 2256.12             | 942.36              | 0.269                            | 1745.71             | 469.68              |
| A_68_P20149940 | chr1:36766481-36766525                            | NM_146107:268      | Actr1b     | INSIDE                 | 0.358                                           | 0.442                            | 2835.28             | 1253.82             | 0.158                            | 2026.68             | 321.20              |
| A_68_P23548816 | chr5:25266039-25266083                            | NM_001004365:217   | Actr3b     | INSIDE                 | 0.274                                           | 1.719                            | 13031.31            | 22401.81            | 0.472                            | 8506.81             | 4013.59             |
| A_68_P21784026 | chr2:158450747-158450791                          | NM_175419:120      | Actr5      | INSIDE                 | 0.273                                           | 0.659                            | 2060.57             | 1357.21             | 0.180                            | 1368.50             | 246.22              |
| A_68_P27332753 | chr10:89194937-89194988                           | NM_025914:78       | Actr6      | INSIDE                 | 0.168                                           | 0.521                            | 1795.15             | 935.48              | 0.087                            | 1382.16             | 120.83              |
| A_68_P26872171 | chr9:119312063-119312107                          | NM_007397:466      | Acvr2b     | INSIDE                 | 0.079                                           | 0.717                            | 2617.25             | 1877.42             | 0.057                            | 2058.02             | 117.29              |
| A_68_P26872302 | chr9:119336590-119336634                          | NM_007397:24994    | Acvr2b     | INSIDE                 | 0.612                                           | 2.514                            | 1913.37             | 4810.10             | 1.537                            | 1406.02             | 2161.67             |
| A_68_P27680036 | chr11:30549094-30549138                           | NM_029344:280      | Acyp2      | INSIDE                 | 0.100                                           | 0.378                            | 4018.16             | 1517.92             | 0.038                            | 3253.51             | 122.83              |
| A_68_P21814245 | chr2:163575768-163575812                          | NM_007398:123      | Ada        | INSIDE                 | 0.190                                           | 0.575                            | 2172.96             | 1250.34             | 0.109                            | 1562.42             | 170.93              |
| A_68_P28081367 | chr11:102635750-102635794                         | NM_001110778:13020 | Adam11     | INSIDE                 | 0.258                                           | 0.657                            | 858.17              | 564.16              | 0.169                            | 742.98              | 125.83              |
| A_68_P28081370 | chr11:102636075-102636119                         | NM_001110778:13344 | Adam11     | INSIDE                 | 0.233                                           | 0.526                            | 1296.45             | 681.48              | 0.122                            | 980.89              | 120.04              |
| A_68_P27765617 | chr11:45869706-45869750                           | NM_009616:240      | Adam19     | INSIDE                 | 0.319                                           | 0.584                            | 2450.04             | 1431.58             | 0.186                            | 1938.75             | 361.00              |
| A_68_P27765618 | chr11:45869772-45869816                           | NM_009616:306      | Adam19     | INSIDE                 | 0.641                                           | 0.640                            | 1923.87             | 1232.24             | 0.411                            | 1518.19             | 623.73              |
| A_68_P20286847 | chr1:63493039-63493083                            | NM_001177600:583   | Adam23     | INSIDE                 | 0.564                                           | 0.590                            | 2294.50             | 1354.14             | 0.333                            | 1842.08             | 612.75              |
| A_68_P30931274 | chr16:85802529-85802573                           | NM_009621:810      | Adamts1    | INSIDE                 | 0.578                                           | 0.515                            | 1303.21             | 671.32              | 0.298                            | 1028.77             | 306.50              |
| A_68_P31149283 | chr17:33661330-33661374                           | NM_172619:212      | Adamts10   | INSIDE                 | 0.277                                           | 1.632                            | 922.24              | 1505.21             | 0.452                            | 739.29              | 334.16              |
| A_68_P27179426 | chr10:60708843-60708887                           | NM_001081127:27322 | Adamts14   | INSIDE                 | 0.601                                           | 2.570                            | 1597.10             | 4104.40             | 1.544                            | 1165.79             | 1800.06             |
| A_68_P27179599 | chr10:60735806-60735850                           | NM_001081127:358   | Adamts14   | INSIDE                 | 0.183                                           | 0.700                            | 2886.75             | 2021.85             | 0.128                            | 2179.58             | 278.88              |
| A_68_P26397638 | chr9:30729092-30729141                            | NM_001024139:921   | Adamts15   | INSIDE                 | 0.325                                           | 0.630                            | 1640.84             | 1034.07             | 0.205                            | 1173.36             | 240.07              |
| A_68_P26397642 | chr9:30729620-30729675                            | NM_001024139:390   | Adamts15   | INSIDE                 | 0.171                                           | 0.599                            | 1573.92             | 943.39              | 0.102                            | 1205.69             | 123.52              |

| ProbeName      | Target position of probe on CpG island microarray | TargetID           | GeneSymbol | CpG island Description | Ratio of relative methylation (TiO2-NP/Vehicle) | Sham group                       |                     |                     | TiO <sub>2</sub> -H group        |                     |                     |
|----------------|---------------------------------------------------|--------------------|------------|------------------------|-------------------------------------------------|----------------------------------|---------------------|---------------------|----------------------------------|---------------------|---------------------|
|                |                                                   |                    |            |                        |                                                 | Relative methylation (Cy-5/Cy-3) | Cy-3 signal (Input) | Cy-5 signal (MeDIP) | Relative methylation (Cy-5/Cy-3) | Cy-3 signal (Input) | Cy-5 signal (MeDIP) |
| A_68_P26397643 | chr9:30729700-30729744                            | NM_001024139:315   | Adamts15   | INSIDE                 | 0.504                                           | 0.569                            | 1883.97             | 1072.40             | 0.287                            | 1442.49             | 414.02              |
| A_68_P26397644 | chr9:30729778-30729822                            | NM_001024139:237   | Adamts15   | INSIDE                 | 0.393                                           | 0.551                            | 1105.34             | 609.40              | 0.217                            | 921.87              | 199.88              |
| A_68_P26397645 | chr9:30729921-30729965                            | NM_001024139:95    | Adamts15   | INSIDE                 | 0.292                                           | 0.587                            | 2655.06             | 1559.55             | 0.172                            | 1935.71             | 332.19              |
| A_68_P25190563 | chr7:73984782-73984826                            | NM_001033877:184   | Adamts17   | INSIDE                 | 0.578                                           | 0.708                            | 2513.85             | 1779.56             | 0.409                            | 1968.77             | 805.09              |
| A_68_P31744347 | chr18:58995833-58995877                           | NM_175506:-563     | Adamts19   | PROMOTER               | 0.279                                           | 0.496                            | 1144.12             | 567.40              | 0.138                            | 863.25              | 119.34              |
| A_68_P31744350 | chr18:58996079-58996123                           | NM_175506:-317     | Adamts19   | PROMOTER               | 0.668                                           | 0.581                            | 1351.03             | 784.35              | 0.388                            | 1235.00             | 478.76              |
| A_68_P27789380 | chr11:50416439-50416486                           | NM_175643:876      | Adamts2    | INSIDE                 | 0.176                                           | 0.474                            | 1930.20             | 915.07              | 0.083                            | 1400.30             | 116.75              |
| A_68_P30931898 | chr16:85900536-85900586                           | NM_011782:810      | Adamts5    | INSIDE                 | 0.281                                           | 0.421                            | 1248.03             | 525.97              | 0.118                            | 984.46              | 116.54              |
| A_68_P30931901 | chr16:85900910-85900966                           | NM_011782:432      | Adamts5    | INSIDE                 | 0.323                                           | 0.482                            | 1808.46             | 872.30              | 0.156                            | 1374.78             | 214.52              |
| A_68_P26716243 | chr9:90058080-90058124                            | NM_001003911:287   | Adamts7    | INSIDE                 | 0.426                                           | 0.622                            | 3260.24             | 2027.74             | 0.265                            | 2504.27             | 662.96              |
| A_68_P26716246 | chr9:90058314-90058358                            | NM_001003911:521   | Adamts7    | INSIDE                 | 0.245                                           | 0.578                            | 1049.77             | 606.86              | 0.142                            | 834.05              | 118.08              |
| A_68_P25276874 | chr7:89484048-89484092                            | NM_001190374:-133  | Adamts13   | PROMOTER               | 0.560                                           | 46.465                           | 529.23              | 24590.75            | 26.006                           | 626.01              | 16279.64            |
| A_68_P25276880 | chr7:89484688-89484732                            | NM_001190374:507   | Adamts13   | INSIDE                 | 0.414                                           | 0.612                            | 2844.93             | 1740.42             | 0.253                            | 2171.37             | 549.74              |
| A_68_P27282598 | chr10:79804958-79805002                           | NM_001113548:6211  | Adamts15   | INSIDE                 | 0.481                                           | 0.428                            | 1589.39             | 680.46              | 0.206                            | 1199.97             | 247.28              |
| A_68_P27282601 | chr10:79805419-79805466                           | NM_001113548:5749  | Adamts15   | INSIDE                 | 0.054                                           | 2.077                            | 5997.11             | 12454.74            | 0.113                            | 3739.60             | 422.49              |
| A_68_P27282647 | chr10:79811365-79811409                           | NM_001113548:-195  | Adamts15   | DIVERGENT_PROMOTER     | 0.171                                           | 0.568                            | 1666.32             | 946.24              | 0.097                            | 1236.10             | 119.81              |
| A_68_P22321220 | chr3:89519673-89519729                            | NM_001038587:757   | Adar       | INSIDE                 | 0.089                                           | 0.692                            | 2887.04             | 1997.45             | 0.062                            | 2104.34             | 130.19              |
| A_68_P26171282 | chr8:114516157-114516201                          | NM_013925:24       | Adat1      | INSIDE                 | 0.237                                           | 0.667                            | 1148.20             | 765.53              | 0.158                            | 900.57              | 142.08              |
| A_68_P23293919 | chr4:128602230-128602274                          | NM_172875:37409    | Adc        | DOWNSTREAM             | 0.439                                           | 0.704                            | 1371.14             | 965.02              | 0.309                            | 1094.55             | 338.56              |
| A_68_P23294134 | chr4:128639387-128639431                          | NM_172875:253      | Adc        | INSIDE                 | 0.305                                           | 0.550                            | 936.37              | 514.76              | 0.168                            | 720.57              | 120.90              |
| A_68_P23294136 | chr4:128639545-128639589                          | NM_172875:95       | Adc        | INSIDE                 | 0.295                                           | 0.686                            | 6057.50             | 4153.97             | 0.202                            | 4127.09             | 835.52              |
| A_68_P24383758 | chr6:39523742-39523792                            | NM_178873:-108     | Adck2      | PROMOTER               | 0.306                                           | 0.501                            | 1030.05             | 515.84              | 0.153                            | 804.15              | 123.34              |
| A_68_P24383760 | chr6:39523904-39523948                            | NM_178873:52       | Adck2      | INSIDE                 | 0.571                                           | 0.606                            | 3931.43             | 2382.30             | 0.346                            | 2869.75             | 992.80              |
| A_68_P30349161 | chr15:76406872-76406916                           | NM_172960:106      | Adck5      | INSIDE                 | 0.390                                           | 0.474                            | 2356.78             | 1117.91             | 0.185                            | 1905.00             | 352.18              |
| A_68_P27571287 | chr11:6963887-6963931                             | NM_009622:417      | Adecy1     | INSIDE                 | 0.528                                           | 0.561                            | 1086.20             | 609.81              | 0.296                            | 937.42              | 277.72              |
| A_68_P29113346 | chr13:69137647-69137691                           | NM_153534:751      | Adecy2     | INSIDE                 | 0.535                                           | 0.440                            | 1345.71             | 592.01              | 0.236                            | 1189.35             | 280.10              |
| A_68_P29113347 | chr13:69137713-69137757                           | NM_153534:685      | Adecy2     | INSIDE                 | 0.586                                           | 0.475                            | 2924.73             | 1389.59             | 0.279                            | 2510.56             | 699.32              |
| A_68_P30668268 | chr16:35154633-35154677                           | NM_001012765:-1067 | Adecy5     | PROMOTER               | 0.361                                           | 0.385                            | 3579.63             | 1378.53             | 0.139                            | 2871.51             | 399.14              |
| A_68_P26039918 | chr8:90796247-90796291                            | NM_007406:-33      | Adecy7     | PROMOTER               | 0.267                                           | 0.574                            | 965.93              | 554.35              | 0.153                            | 780.81              | 119.53              |
| A_68_P30284259 | chr15:64753330-64753385                           | NM_009623:501      | Adecy8     | INSIDE                 | 0.164                                           | 0.614                            | 1507.56             | 925.75              | 0.101                            | 1182.61             | 119.05              |
| A_68_P30284263 | chr15:64753735-64753779                           | NM_009623:102      | Adecy8     | INSIDE                 | 0.200                                           | 0.386                            | 2013.85             | 777.96              | 0.077                            | 1477.48             | 114.23              |
| A_68_P30284265 | chr15:64753968-64754012                           | NM_009623:-132     | Adecy8     | PROMOTER               | 0.664                                           | 0.712                            | 2819.75             | 2007.06             | 0.472                            | 2311.08             | 1091.54             |
| A_68_P24469549 | chr6:55401776-55401820                            | NM_001025372:-175  | Adecyap1r1 | PROMOTER               | 0.344                                           | 0.587                            | 2809.37             | 1648.59             | 0.202                            | 2108.33             | 425.67              |
| A_68_P24469550 | chr6:55401858-55401902                            | NM_001025372:-93   | Adecyap1r1 | PROMOTER               | 0.436                                           | 0.548                            | 2826.73             | 1548.02             | 0.239                            | 2086.40             | 498.17              |
| A_68_P23595357 | chr5:34959448-34959497                            | NM_001024458:43110 | Add1       | INSIDE                 | 0.538                                           | 4.228                            | 1353.64             | 5723.59             | 2.273                            | 954.73              | 2170.37             |
| A_68_P32180644 | chr19:53216958-53217002                           | NM_001164100:-265  | Add3       | PROMOTER               | 0.201                                           | 0.580                            | 4243.47             | 2462.55             | 0.117                            | 3297.27             | 384.65              |
| A_68_P32180645 | chr19:53217074-53217118                           | NM_001164100:-149  | Add3       | PROMOTER               | 0.275                                           | 0.597                            | 1953.21             | 1166.94             | 0.164                            | 1459.23             | 239.73              |
| A_68_P32180647 | chr19:53217337-53217384                           | NM_013758:-1126    | Add3       | PROMOTER               | 0.286                                           | 0.567                            | 1104.47             | 626.67              | 0.162                            | 889.75              | 144.36              |
| A_68_P22568796 | chr3:138106098-138106142                          | NM_007410:-7       | Adh5       | PROMOTER               | 0.574                                           | 0.367                            | 1963.40             | 720.78              | 0.211                            | 1479.80             | 311.80              |
| A_68_P28314428 | chr12:29360059-29360103                           | NM_134052:9        | Adi1       | INSIDE                 | 0.387                                           | 0.510                            | 2484.60             | 1267.06             | 0.197                            | 1921.23             | 379.24              |
| A_68_P28314431 | chr12:29360343-29360387                           | NM_134052:293      | Adi1       | INSIDE                 | 0.244                                           | 0.469                            | 1350.01             | 633.68              | 0.115                            | 1064.12             | 121.95              |
| A_68_P24792873 | chr6:119339010-119339056                          | NM_197985:28469    | Adipor2    | INSIDE                 | 0.445                                           | 0.561                            | 2349.05             | 1317.51             | 0.249                            | 1921.58             | 479.31              |
| A_68_P21840065 | chr2:168031845-168031889                          | NM_009628:696      | Adnp       | INSIDE                 | 0.368                                           | 1.759                            | 6730.07             | 11837.36            | 0.647                            | 4875.54             | 3155.13             |
| A_68_P31862682 | chr18:80347987-80348031                           | NM_175028:213      | Adnp2      | INSIDE                 | 0.497                                           | 0.641                            | 6326.56             | 4058.41             | 0.319                            | 4988.63             | 1590.41             |

| ProbeName      | Target position of probe on CpG island microarray | TargetID           | GeneSymbol | CpG island Description | Ratio of relative methylation (TiO <sub>2</sub> -NP/Vehicle) | Sham group                       |                     |                     | TiO <sub>2</sub> -H group        |                     |                     |
|----------------|---------------------------------------------------|--------------------|------------|------------------------|--------------------------------------------------------------|----------------------------------|---------------------|---------------------|----------------------------------|---------------------|---------------------|
|                |                                                   |                    |            |                        |                                                              | Relative methylation (Cy-5/Cy-3) | Cy-3 signal (Input) | Cy-5 signal (MeDIP) | Relative methylation (Cy-5/Cy-3) | Cy-3 signal (Input) | Cy-5 signal (MeDIP) |
| A_68_P27212532 | chr10:67010792-67010836                           | NM_001005419:889   | Ado        | INSIDE                 | 0.512                                                        | 0.635                            | 858.81              | 545.74              | 0.325                            | 664.71              | 216.20              |
| A_68_P27212539 | chr10:67011459-67011503                           | NM_001005419:223   | Ado        | INSIDE                 | 0.348                                                        | 0.474                            | 1953.05             | 926.63              | 0.165                            | 1854.02             | 305.70              |
| A_68_P20632244 | chr1:136131312-136131356                          | NM_001008533:670   | Adora1     | INSIDE                 | 0.364                                                        | 0.529                            | 1761.63             | 931.49              | 0.193                            | 1462.88             | 281.90              |
| A_68_P20632245 | chr1:136131391-136131435                          | NM_001008533:592   | Adora1     | INSIDE                 | 0.236                                                        | 0.724                            | 3114.22             | 2255.32             | 0.171                            | 2208.47             | 377.27              |
| A_68_P20632251 | chr1:136132200-136132244                          | NM_001039510:-214  | Adora1     | PROMOTER               | 0.312                                                        | 0.500                            | 1936.92             | 968.66              | 0.156                            | 1415.32             | 220.56              |
| A_68_P20632252 | chr1:136132290-136132334                          | NM_001039510:-304  | Adora1     | PROMOTER               | 0.126                                                        | 0.486                            | 2639.68             | 1282.81             | 0.061                            | 1928.81             | 118.51              |
| A_68_P27255924 | chr10:74779536-74779580                           | NM_009630:-129     | Adora2a    | PROMOTER               | 0.343                                                        | 0.525                            | 1504.76             | 790.52              | 0.180                            | 1360.65             | 245.11              |
| A_68_P27255927 | chr10:74779785-74779829                           | NM_009630:119      | Adora2a    | INSIDE                 | 0.493                                                        | 0.672                            | 1237.39             | 831.22              | 0.331                            | 943.47              | 312.53              |
| A_68_P27255933 | chr10:74780494-74780538                           | NM_009630:829      | Adora2a    | INSIDE                 | 0.411                                                        | 1.363                            | 5453.48             | 7433.18             | 0.561                            | 3819.41             | 2141.52             |
| A_68_P27852924 | chr11:62062701-62062745                           | NM_007413:237      | Adora2b    | INSIDE                 | 0.299                                                        | 0.603                            | 1530.82             | 923.71              | 0.180                            | 1165.56             | 210.17              |
| A_68_P27852925 | chr11:62062872-62062916                           | NM_007413:409      | Adora2b    | INSIDE                 | 0.400                                                        | 0.617                            | 1152.32             | 711.48              | 0.247                            | 829.07              | 204.77              |
| A_68_P26552549 | chr9:59138886-59138933                            | NM_028121:-469     | Adpgk      | PROMOTER               | 0.199                                                        | 1.569                            | 699.77              | 1097.66             | 0.312                            | 432.76              | 135.16              |
| A_68_P26552550 | chr9:59139013-59139070                            | NM_028121:-337     | Adpgk      | PROMOTER               | 0.101                                                        | 1.660                            | 908.07              | 1507.08             | 0.168                            | 688.46              | 115.73              |
| A_68_P30686065 | chr16:38452492-38452536                           | NM_007414:255      | Adprh      | INSIDE                 | 0.196                                                        | 0.558                            | 2277.40             | 1270.88             | 0.109                            | 1709.95             | 187.03              |
| A_68_P27752256 | chr11:43589831-43589875                           | NM_007416:59982    | Adra1b     | INSIDE                 | 0.169                                                        | 0.528                            | 1676.76             | 885.01              | 0.089                            | 1353.69             | 120.75              |
| A_68_P21635701 | chr2:131387590-131387634                          | NM_013460:409      | Adra1d     | INSIDE                 | 0.233                                                        | 0.736                            | 10680.82            | 7860.54             | 0.172                            | 7030.56             | 1207.73             |
| A_68_P32186046 | chr19:54119698-54119742                           | NM_007417:49       | Adra2a     | INSIDE                 | 0.273                                                        | 0.511                            | 1098.89             | 561.95              | 0.140                            | 866.41              | 120.92              |
| A_68_P32186047 | chr19:54119811-54119855                           | NM_007417:161      | Adra2a     | INSIDE                 | 0.536                                                        | 0.587                            | 3096.72             | 1818.20             | 0.315                            | 2514.63             | 791.42              |
| A_68_P32186057 | chr19:54120878-54120926                           | NM_007417:1231     | Adra2a     | INSIDE                 | 0.168                                                        | 0.536                            | 1918.46             | 1027.47             | 0.090                            | 1372.09             | 123.73              |
| A_68_P32186059 | chr19:54121110-54121154                           | NM_007417:1461     | Adra2a     | INSIDE                 | 0.304                                                        | 0.409                            | 2147.85             | 877.83              | 0.124                            | 1504.28             | 186.62              |
| A_68_P32186060 | chr19:54121227-54121271                           | NM_007417:1577     | Adra2a     | INSIDE                 | 0.634                                                        | 0.689                            | 1199.32             | 826.91              | 0.437                            | 916.79              | 400.61              |
| A_68_P32186064 | chr19:54121845-54121889                           | NM_007417:2195     | Adra2a     | INSIDE                 | 0.582                                                        | 0.467                            | 4281.35             | 1999.14             | 0.272                            | 3174.42             | 862.59              |
| A_68_P21612948 | chr2:127188974-127189018                          | NM_009633:-25      | Adra2b     | PROMOTER               | 0.303                                                        | 0.563                            | 1277.86             | 718.97              | 0.170                            | 1108.29             | 188.80              |
| A_68_P23599454 | chr5:35621406-35621450                            | NM_007418:214      | Adra2c     | INSIDE                 | 0.182                                                        | 0.553                            | 1598.51             | 883.50              | 0.100                            | 1161.96             | 116.66              |
| A_68_P32202579 | chr19:56797245-56797289                           | NM_007419:405      | Adrb1      | INSIDE                 | 0.323                                                        | 0.619                            | 1423.99             | 880.90              | 0.200                            | 1004.83             | 200.82              |
| A_68_P32202582 | chr19:56797590-56797634                           | NM_007419:751      | Adrb1      | INSIDE                 | 0.509                                                        | 0.519                            | 1228.43             | 637.95              | 0.265                            | 789.68              | 208.88              |
| A_68_P31762245 | chr18:62340024-62340068                           | NM_007420:-433     | Adrb2      | PROMOTER               | 0.179                                                        | 1.460                            | 5578.55             | 8143.74             | 0.262                            | 3947.58             | 1032.70             |
| A_68_P25737279 | chr8:28338376-28338420                            | NM_013462:1662     | Adrb3      | INSIDE                 | 0.541                                                        | 0.720                            | 4041.98             | 2911.20             | 0.389                            | 2792.44             | 1087.61             |
| A_68_P25737280 | chr8:28338452-28338496                            | NM_013462:1586     | Adrb3      | INSIDE                 | 0.255                                                        | 0.590                            | 1032.95             | 609.49              | 0.150                            | 815.87              | 122.62              |
| A_68_P25737281 | chr8:28338526-28338570                            | NM_013462:1512     | Adrb3      | INSIDE                 | 0.304                                                        | 0.722                            | 2240.17             | 1618.18             | 0.220                            | 1672.88             | 367.55              |
| A_68_P25737282 | chr8:28338659-28338703                            | NM_013462:1380     | Adrb3      | INSIDE                 | 0.155                                                        | 0.659                            | 2667.12             | 1756.75             | 0.102                            | 1824.16             | 186.68              |
| A_68_P25737283 | chr8:28338782-28338826                            | NM_013462:1256     | Adrb3      | INSIDE                 | 0.565                                                        | 0.478                            | 1126.79             | 539.00              | 0.270                            | 883.04              | 238.86              |
| A_68_P31922428 | chr19:4305887-4305931                             | NM_130863:47       | Adrbk1     | INSIDE                 | 0.663                                                        | 0.669                            | 1755.30             | 1173.42             | 0.443                            | 1417.95             | 628.83              |
| A_68_P21901918 | chr2:179906691-179906735                          | NM_019822:420      | Adrm1      | INSIDE                 | 0.560                                                        | 0.711                            | 1492.54             | 1061.72             | 0.399                            | 1260.83             | 502.47              |
| A_68_P20861819 | chr1:179726176-179726220                          | NM_007422:442      | Adss       | INSIDE                 | 0.556                                                        | 0.534                            | 1026.39             | 548.56              | 0.297                            | 842.72              | 250.47              |
| A_68_P28751330 | chr12:113858462-113858506                         | NM_007421:227      | Adssl1     | INSIDE                 | 0.547                                                        | 0.643                            | 4984.36             | 3205.37             | 0.352                            | 3561.95             | 1253.03             |
| A_68_P27565299 | chr11:5761759-5761803                             | NM_009636:-88      | Aebp1      | PROMOTER               | 0.244                                                        | 0.742                            | 2809.22             | 2083.64             | 0.181                            | 1898.17             | 343.24              |
| A_68_P20161228 | chr1:38683615-38683660                            | NM_010678:38163    | Aff3       | INSIDE                 | 0.157                                                        | 0.686                            | 3374.56             | 2315.49             | 0.108                            | 2187.27             | 235.93              |
| A_68_P20161231 | chr1:38683942-38683986                            | NM_010678:37836    | Aff3       | INSIDE                 | 0.191                                                        | 0.433                            | 1946.82             | 842.06              | 0.083                            | 1422.82             | 117.60              |
| A_68_P26240062 | chr8:126001616-126001660                          | NM_054070:-123     | Afg3l1     | PROMOTER               | 0.404                                                        | 0.494                            | 2109.64             | 1041.20             | 0.199                            | 1607.97             | 320.67              |
| A_68_P20429507 | chr1:91350965-91351009                            | NM_001037136:-399  | Agap1      | PROMOTER               | 0.420                                                        | 0.601                            | 947.41              | 568.97              | 0.252                            | 814.03              | 205.32              |
| A_68_P20429508 | chr1:91351074-91351118                            | NM_001037136:-289  | Agap1      | PROMOTER               | 0.630                                                        | 0.599                            | 1031.65             | 617.65              | 0.377                            | 954.07              | 359.59              |
| A_68_P27534003 | chr10:126528845-126528889                         | NM_001033263:12904 | Agap2      | INSIDE                 | 0.607                                                        | 0.585                            | 2525.24             | 1476.80             | 0.355                            | 1894.39             | 672.92              |
| A_68_P21418961 | chr2:90623244-90623288                            | NM_178755:366      | Agbl2      | INSIDE                 | 0.266                                                        | 0.655                            | 832.57              | 545.04              | 0.174                            | 673.62              | 117.42              |

| ProbeName      | Target position of probe on CpG island microarray | TargetID            | GeneSymbol | CpG island Description | Ratio of relative methylation (TiO2-NP/Vehicle) | Sham group                       |                     |                     | TiO <sub>2</sub> -H group        |                     |                     |
|----------------|---------------------------------------------------|---------------------|------------|------------------------|-------------------------------------------------|----------------------------------|---------------------|---------------------|----------------------------------|---------------------|---------------------|
|                |                                                   |                     |            |                        |                                                 | Relative methylation (Cy-5/Cy-3) | Cy-3 signal (Input) | Cy-5 signal (MeDIP) | Relative methylation (Cy-5/Cy-3) | Cy-3 signal (Input) | Cy-5 signal (MeDIP) |
| A_68_P21418962 | chr2:90623430-90623474                            | NM_178755:552       | Agbl2      | INSIDE                 | 0.136                                           | 1.458                            | 737.57              | 1075.64             | 0.199                            | 591.98              | 117.60              |
| A_68_P20395056 | chr1:82835794-82835840                            | NM_010472:-241      | Agfg1      | PROMOTER               | 0.228                                           | 0.582                            | 1367.22             | 795.85              | 0.132                            | 1049.33             | 139.00              |
| A_68_P20395061 | chr1:82836417-82836461                            | NM_010472:381       | Agfg1      | INSIDE                 | 0.639                                           | 0.503                            | 2044.72             | 1029.10             | 0.321                            | 1736.66             | 558.30              |
| A_68_P20395062 | chr1:82836520-82836565                            | NM_010472:485       | Agfg1      | INSIDE                 | 0.525                                           | 0.473                            | 2355.63             | 1115.29             | 0.248                            | 2053.78             | 510.21              |
| A_68_P24127041 | chr5:138125324-138125368                          | NM_178162:499       | Agfg2      | INSIDE                 | 0.355                                           | 1.514                            | 3297.19             | 4992.30             | 0.538                            | 2537.47             | 1365.55             |
| A_68_P24127047 | chr5:138126002-138126046                          | NM_145566:-103      | Agfg2      | PROMOTER               | 0.102                                           | 0.612                            | 2730.81             | 1672.50             | 0.063                            | 1991.80             | 124.89              |
| A_68_P22451304 | chr3:116510918-116510962                          | NM_001081326:144    | Agf1       | INSIDE                 | 0.428                                           | 0.535                            | 1294.85             | 692.82              | 0.229                            | 1035.02             | 236.91              |
| A_68_P25700847 | chr8:18846041-18846085                            | NM_026792:-216      | Agpat5     | PROMOTER               | 0.292                                           | 0.411                            | 1275.85             | 524.29              | 0.120                            | 1017.50             | 121.91              |
| A_68_P25700848 | chr8:18846199-18846243                            | NM_026792:-58       | Agpat5     | PROMOTER               | 0.522                                           | 0.509                            | 1102.65             | 561.01              | 0.265                            | 892.11              | 236.84              |
| A_68_P23931758 | chr5:101275769-101275813                          | NM_172715:543       | Agpat9     | INSIDE                 | 0.462                                           | 0.479                            | 1329.45             | 636.65              | 0.221                            | 1183.39             | 261.82              |
| A_68_P26528457 | chr9:54765090-54765134                            | NM_177351:16        | Agphd1     | INSIDE                 | 0.378                                           | 0.546                            | 1391.53             | 759.53              | 0.206                            | 1175.08             | 242.26              |
| A_68_P26528458 | chr9:54765158-54765202                            | NM_177351:84        | Agphd1     | INSIDE                 | 0.539                                           | 0.449                            | 1164.67             | 523.52              | 0.242                            | 912.64              | 221.10              |
| A_68_P21763873 | chr2:154899789-154899833                          | NM_016661:423       | Ahcy       | INSIDE                 | 0.297                                           | 0.646                            | 938.05              | 605.85              | 0.192                            | 870.33              | 166.71              |
| A_68_P22408052 | chr3:107498784-107498828                          | NM_145542:660       | Ahcy11     | INSIDE                 | 0.304                                           | 0.538                            | 963.70              | 518.10              | 0.164                            | 739.87              | 121.09              |
| A_68_P22408053 | chr3:107498878-107498922                          | NM_145542:566       | Ahcy11     | INSIDE                 | 0.234                                           | 0.588                            | 2456.61             | 1443.28             | 0.138                            | 1764.56             | 243.08              |
| A_68_P23315176 | chr4:132567687-132567731                          | NM_146155:288       | Ahdc1      | INSIDE                 | 0.172                                           | 1.466                            | 1685.86             | 2471.02             | 0.251                            | 1289.17             | 324.19              |
| A_68_P23315178 | chr4:132568014-132568058                          | NM_146155:616       | Ahdc1      | INSIDE                 | 0.191                                           | 0.670                            | 2242.42             | 1502.03             | 0.128                            | 1618.48             | 207.13              |
| A_68_P28615065 | chr12:88607920-88607964                           | NM_146036:265       | Ahsa1      | INSIDE                 | 0.122                                           | 0.638                            | 2048.00             | 1306.59             | 0.078                            | 1546.60             | 120.84              |
| A_68_P27646188 | chr11:23397444-23397495                           | NM_172391:477       | Ahsa2      | INSIDE                 | 0.172                                           | 0.686                            | 1131.32             | 775.95              | 0.118                            | 1041.98             | 122.75              |
| A_68_P21492617 | chr2:104966415-104966459                          | NR_015462:231       | AI314831   | INSIDE                 | 0.654                                           | 0.614                            | 1321.80             | 812.21              | 0.402                            | 1146.31             | 460.51              |
| A_68_P31217295 | chr17:48549255-48549304                           | NM_207219:-125      | AI314976   | DIVERGENT_PROMOTER     | 0.105                                           | 0.542                            | 4840.56             | 2622.58             | 0.057                            | 3366.25             | 191.33              |
| A_68_P22862464 | chr4:41445752-41445802                            | NM_00108515:4333    | AI464131   | INSIDE                 | 0.231                                           | 0.610                            | 1138.17             | 694.28              | 0.141                            | 833.82              | 117.44              |
| A_68_P30645469 | chr16:31080852-31080896                           | NM_198626:644       | AI480653   | INSIDE                 | 0.181                                           | 0.322                            | 2651.92             | 854.51              | 0.058                            | 2070.11             | 120.64              |
| A_68_P27306489 | chr10:84565593-84565637                           | NM_001013028:243    | AI597468   | INSIDE                 | 0.209                                           | 0.401                            | 1986.43             | 796.55              | 0.084                            | 1449.41             | 121.45              |
| A_68_P27306493 | chr10:84565965-84566009                           | NM_001013028:615    | AI597468   | INSIDE                 | 0.434                                           | 0.556                            | 1941.87             | 1079.40             | 0.241                            | 1589.97             | 383.45              |
| A_68_P27257133 | chr10:75023101-75023145                           | NM_198860:-47       | AI646023   | PROMOTER               | 0.236                                           | 0.516                            | 1623.55             | 837.00              | 0.122                            | 1313.90             | 160.10              |
| A_68_P30473516 | chr15:97998981-97999025                           | NM_177716:766       | AI836003   | INSIDE                 | 0.440                                           | 0.387                            | 1924.31             | 743.77              | 0.170                            | 1490.62             | 253.52              |
| A_68_P31928608 | chr19:5425407-5425451                             | NM_134149:285       | AI837181   | INSIDE                 | 0.245                                           | 0.497                            | 1252.93             | 622.27              | 0.122                            | 994.39              | 121.10              |
| A_68_P31939553 | chr19:7456891-7456935                             | NM_001033139:604    | AI846148   | INSIDE                 | 0.243                                           | 0.574                            | 1135.49             | 651.36              | 0.139                            | 925.61              | 129.10              |
| A_68_P31939559 | chr19:7457501-7457545                             | NM_001033139:-6     | AI846148   | PROMOTER               | 0.614                                           | 0.510                            | 1834.51             | 936.50              | 0.313                            | 1487.51             | 466.18              |
| A_68_P31939560 | chr19:7457601-7457645                             | NM_001033139:-106   | AI846148   | PROMOTER               | 0.330                                           | 0.526                            | 1069.98             | 563.05              | 0.173                            | 900.28              | 156.12              |
| A_68_P20774313 | chr1:163806678-163806722                          | NM_172645:92        | AI848100   | INSIDE                 | 0.367                                           | 0.580                            | 4191.61             | 2429.48             | 0.213                            | 2962.20             | 630.90              |
| A_68_P21112312 | chr2:31805862-31805906                            | NM_145144:62        | Aif11      | INSIDE                 | 0.184                                           | 0.505                            | 1702.28             | 859.54              | 0.093                            | 1254.23             | 116.52              |
| A_68_P21112313 | chr2:31806031-31806075                            | NM_145144:230       | Aif11      | INSIDE                 | 0.112                                           | 0.736                            | 2051.78             | 1509.51             | 0.082                            | 1448.79             | 119.03              |
| A_68_P32365089 | chrX:45866544-45866588                            | NM_012019:37        | Aifm1      | INSIDE                 | 0.141                                           | 1.937                            | 2558.66             | 4956.93             | 0.273                            | 1047.74             | 285.92              |
| A_68_P23320947 | chr4:133637971-133638015                          | NM_001162970:13626  | Aim11      | INSIDE                 | 0.204                                           | 0.553                            | 1238.36             | 685.15              | 0.113                            | 1041.24             | 117.48              |
| A_68_P31921206 | chr19:4121378-4121422                             | NM_016666:4427      | Aip        | INSIDE                 | 0.212                                           | 0.356                            | 2112.87             | 751.28              | 0.075                            | 1614.89             | 121.80              |
| A_68_P27271774 | chr10:77506231-77506275                           | NM_009646:73        | Aire       | INSIDE                 | 0.602                                           | 0.694                            | 2650.11             | 1838.64             | 0.418                            | 2071.33             | 865.39              |
| A_68_P23424431 | chr4:152748069-152748119                          | NM_001099299:108845 | Ajap1      | INSIDE                 | 0.214                                           | 2.353                            | 842.68              | 1982.91             | 0.504                            | 619.09              | 311.99              |
| A_68_P23154898 | chr4:101092046-101092090                          | NM_009647:-239      | Ak4        | PROMOTER               | 0.559                                           | 0.389                            | 1620.81             | 630.52              | 0.218                            | 1481.13             | 322.15              |
| A_68_P23154900 | chr4:101092304-101092348                          | NM_009647:19        | Ak4        | INSIDE                 | 0.656                                           | 0.687                            | 1672.17             | 1148.10             | 0.451                            | 1431.01             | 645.01              |
| A_68_P28002760 | chr11:88725701-88725745                           | NM_001042541:178    | Akap1      | INSIDE                 | 0.486                                           | 0.621                            | 1989.26             | 1234.52             | 0.302                            | 1676.77             | 505.57              |
| A_68_P27851243 | chr11:61743609-61743653                           | NM_019921:98        | Akap10     | INSIDE                 | 0.352                                           | 0.516                            | 2421.17             | 1248.76             | 0.182                            | 1779.02             | 323.01              |
| A_68_P29746359 | chr14:78936378-78936422                           | NM_001164503:267    | Akap11     | INSIDE                 | 0.518                                           | 0.603                            | 1770.61             | 1066.91             | 0.312                            | 1508.62             | 471.03              |



| ProbeName      | Target position of probe on CpG island microarray | TargetID           | GeneSymbol | CpG island Description | Ratio of relative methylation (TiO2-NP/Vehicle) | Sham group                       |                     |                     | TiO <sub>2</sub> -H group        |                     |                     |
|----------------|---------------------------------------------------|--------------------|------------|------------------------|-------------------------------------------------|----------------------------------|---------------------|---------------------|----------------------------------|---------------------|---------------------|
|                |                                                   |                    |            |                        |                                                 | Relative methylation (Cy-5/Cy-3) | Cy-3 signal (Input) | Cy-5 signal (MeDIP) | Relative methylation (Cy-5/Cy-3) | Cy-3 signal (Input) | Cy-5 signal (MeDIP) |
| A_68_P26913680 | chr10:6079737-6079781                             | NM_031185:454      | Akap12     | INSIDE                 | 0.292                                           | 0.593                            | 2600.83             | 1542.13             | 0.173                            | 2115.32             | 366.03              |
| A_68_P26913681 | chr10:6079865-6079909                             | NM_031185:326      | Akap12     | INSIDE                 | 0.665                                           | 0.659                            | 1348.73             | 889.00              | 0.438                            | 1308.06             | 573.28              |
| A_68_P28553309 | chr12:77426063-77426107                           | NM_001101471:207   | Akap5      | INSIDE                 | 0.172                                           | 0.552                            | 2337.65             | 1289.53             | 0.095                            | 1749.51             | 165.95              |
| A_68_P31144953 | chr17:32457424-32457468                           | NM_019774:652      | Akap8      | INSIDE                 | 0.213                                           | 0.556                            | 1507.99             | 838.82              | 0.118                            | 1145.46             | 135.54              |
| A_68_P31144955 | chr17:32457753-32457797                           | NM_019774:324      | Akap8      | INSIDE                 | 0.398                                           | 0.543                            | 1365.85             | 741.62              | 0.216                            | 1107.07             | 239.38              |
| A_68_P31145137 | chr17:32487319-32487363                           | NM_017476:182      | Akap8I     | INSIDE                 | 0.087                                           | 1.577                            | 3470.55             | 5473.20             | 0.137                            | 2299.72             | 314.37              |
| A_68_P31145138 | chr17:32487412-32487456                           | NM_017476:88       | Akap8I     | INSIDE                 | 0.099                                           | 0.749                            | 4511.75             | 3377.65             | 0.074                            | 2899.74             | 214.89              |
| A_68_P31145139 | chr17:32487576-32487627                           | NM_017476:-79      | Akap8I     | PROMOTER               | 0.322                                           | 0.500                            | 1310.92             | 655.00              | 0.161                            | 954.49              | 153.79              |
| A_68_P22831249 | chr4:34498566-34498610                            | NM_001007589:725   | Akirin2    | INSIDE                 | 0.413                                           | 0.604                            | 2742.82             | 1656.91             | 0.250                            | 2173.52             | 542.87              |
| A_68_P22970308 | chr4:63071362-63071406                            | NM_001045514:-6905 | Akna       | PROMOTER               | 0.536                                           | 0.613                            | 1618.74             | 991.68              | 0.328                            | 1251.62             | 410.78              |
| A_68_P24355040 | chr6:34267503-34267547                            | NM_009658:-35      | Akr1b3     | PROMOTER               | 0.195                                           | 0.528                            | 1484.47             | 784.17              | 0.103                            | 1179.64             | 121.74              |
| A_68_P25089660 | chr7:52104564-52104618                            | NM_026270:-6       | Akt1s1     | DIVERGENT_PROMOTER     | 0.238                                           | 0.600                            | 1141.66             | 685.17              | 0.143                            | 811.48              | 115.94              |
| A_68_P25089669 | chr7:52105544-52105588                            | NM_026270:970      | Akt1s1     | INSIDE                 | 0.303                                           | 0.509                            | 1725.73             | 878.07              | 0.154                            | 1072.00             | 165.37              |
| A_68_P25089670 | chr7:52105704-52105748                            | NM_026270:1130     | Akt1s1     | INSIDE                 | 0.596                                           | 0.546                            | 998.05              | 545.25              | 0.325                            | 857.57              | 279.07              |
| A_68_P25089687 | chr7:52107857-52107901                            | NM_026270:3282     | Akt1s1     | INSIDE                 | 0.639                                           | 2.612                            | 1327.96             | 3469.01             | 1.668                            | 938.04              | 1564.97             |
| A_68_P25017993 | chr7:28377186-28377230                            | NM_001110208:630   | Akt2       | INSIDE                 | 0.274                                           | 0.697                            | 2136.42             | 1489.41             | 0.191                            | 1819.26             | 346.88              |
| A_68_P20858578 | chr1:179187386-179187430                          | NM_011785:-8510    | Akt3       | PROMOTER               | 0.336                                           | 0.610                            | 1755.05             | 1071.10             | 0.205                            | 1321.79             | 271.31              |
| A_68_P20858579 | chr1:179187522-179187574                          | NM_011785:-8650    | Akt3       | PROMOTER               | 0.070                                           | 1.543                            | 4336.99             | 6692.37             | 0.108                            | 2838.08             | 305.62              |
| A_68_P22964916 | chr4:62180749-62180793                            | NM_008525:327      | Alad       | INSIDE                 | 0.192                                           | 0.537                            | 1393.27             | 747.63              | 0.103                            | 1143.27             | 117.60              |
| A_68_P26802099 | chr9:106150157-106150201                          | NM_020559:107      | Alas1      | INSIDE                 | 0.653                                           | 0.720                            | 1662.89             | 1196.94             | 0.470                            | 1261.48             | 593.12              |
| A_68_P30762456 | chr16:52453372-52453416                           | NM_009655:-284     | Alcam      | PROMOTER               | 0.482                                           | 0.403                            | 1841.83             | 741.46              | 0.194                            | 1337.84             | 259.65              |
| A_68_P22885108 | chr4:45811962-45812007                            | NM_028270:91       | Aldh1b1    | INSIDE                 | 0.030                                           | 1.585                            | 5500.95             | 8720.82             | 0.047                            | 3396.99             | 159.35              |
| A_68_P24045427 | chr5:122043186-122043230                          | NM_009656:625      | Aldh2      | INSIDE                 | 0.431                                           | 0.585                            | 1349.74             | 789.32              | 0.252                            | 1113.59             | 280.38              |
| A_68_P24045430 | chr5:122043561-122043605                          | NM_009656:251      | Aldh2      | INSIDE                 | 0.156                                           | 0.476                            | 3110.23             | 1481.66             | 0.074                            | 2240.34             | 165.99              |
| A_68_P27847520 | chr11:61081060-61081115                           | NM_007437:-458     | Aldh3a2    | PROMOTER               | 0.172                                           | 0.455                            | 2115.04             | 961.48              | 0.078                            | 1541.58             | 120.82              |
| A_68_P28598366 | chr12:85791678-85791722                           | NM_134042:200      | Aldh6a1    | INSIDE                 | 0.121                                           | 1.332                            | 7482.58             | 9964.34             | 0.161                            | 4747.57             | 765.86              |
| A_68_P20804634 | chr1:169280619-169280663                          | NM_019993:519      | Aldh9a1    | INSIDE                 | 0.052                                           | 1.869                            | 4491.55             | 8394.50             | 0.097                            | 2920.32             | 284.26              |
| A_68_P25708993 | chr8:23171282-23171328                            | NM_183142:113      | Alg11      | INSIDE                 | 0.102                                           | 0.617                            | 2628.99             | 1622.12             | 0.063                            | 1888.49             | 118.64              |
| A_68_P30421417 | chr15:88649565-88649609                           | NM_001142357:162   | Alg12      | INSIDE                 | 0.273                                           | 0.543                            | 1595.05             | 866.27              | 0.148                            | 1265.72             | 187.67              |
| A_68_P30421419 | chr15:88649879-88649923                           | NM_001142357:-152  | Alg12      | DIVERGENT_PROMOTER     | 0.235                                           | 0.665                            | 2666.42             | 1773.58             | 0.156                            | 1891.08             | 295.64              |
| A_68_P32717148 | chrX:140752921-140752965                          | NM_026247:434      | Alg13      | INSIDE                 | 0.142                                           | 2.935                            | 7059.89             | 20719.84            | 0.417                            | 2859.28             | 1192.69             |
| A_68_P22149462 | chr3:54539562-54539606                            | NM_025442:124      | Alg5       | INSIDE                 | 0.625                                           | 0.553                            | 1629.65             | 901.92              | 0.346                            | 1252.56             | 432.93              |
| A_68_P26505579 | chr9:50583333-50583384                            | NM_133981:-76      | Alg9       | PROMOTER               | 0.162                                           | 0.588                            | 1731.65             | 1018.31             | 0.095                            | 1203.41             | 114.79              |
| A_68_P26505580 | chr9:50583427-50583471                            | NM_133981:14       | Alg9       | INSIDE                 | 0.337                                           | 0.698                            | 2005.94             | 1400.85             | 0.235                            | 1403.20             | 330.31              |
| A_68_P31341458 | chr17:72953415-72953461                           | NM_007439:209      | Alk        | INSIDE                 | 0.166                                           | 0.460                            | 2298.82             | 1057.21             | 0.076                            | 1553.46             | 118.26              |
| A_68_P21438173 | chr2:93816579-93816623                            | NM_026944:34287    | Alkbh3     | DOWNSTREAM             | 0.391                                           | 0.698                            | 1383.11             | 965.21              | 0.273                            | 1073.71             | 293.35              |
| A_68_P27843668 | chr11:60351780-60351824                           | NM_172943:618      | Alkbh5     | INSIDE                 | 0.486                                           | 0.593                            | 2332.94             | 1383.25             | 0.288                            | 1880.47             | 541.65              |
| A_68_P27843675 | chr11:60352579-60352623                           | NM_172943:1416     | Alkbh5     | INSIDE                 | 0.440                                           | 0.495                            | 1031.61             | 510.70              | 0.218                            | 768.43              | 167.25              |
| A_68_P27899782 | chr11:70068529-70068574                           | NM_007440:292      | Alox12     | INSIDE                 | 0.150                                           | 0.677                            | 1773.54             | 1200.29             | 0.101                            | 1165.93             | 118.12              |
| A_68_P20262082 | chr1:59176751-59176795                            | NM_001037812:-122  | Als2cr4    | PROMOTER               | 0.637                                           | 0.626                            | 1856.35             | 1162.14             | 0.399                            | 1222.12             | 487.50              |
| A_68_P20262085 | chr1:59176968-59177012                            | NM_001033449:-50   | Als2cr4    | PROMOTER               | 0.394                                           | 0.586                            | 1764.61             | 1034.63             | 0.231                            | 1379.76             | 318.35              |
| A_68_P27404961 | chr10:102491000-102491044                         | NM_172553:389      | Alx1       | INSIDE                 | 0.261                                           | 0.510                            | 1147.41             | 585.22              | 0.133                            | 905.64              | 120.72              |
| A_68_P22407408 | chr3:107399047-107399091                          | NM_007441:1120     | Alx3       | INSIDE                 | 0.394                                           | 0.699                            | 1352.07             | 945.75              | 0.276                            | 993.19              | 273.74              |
| A_68_P22407409 | chr3:107399162-107399206                          | NM_007441:1236     | Alx3       | INSIDE                 | 0.383                                           | 0.530                            | 2117.75             | 1122.27             | 0.203                            | 1486.17             | 301.27              |

| ProbeName      | Target position of probe on CpG island microarray | TargetID          | GeneSymbol | CpG island Description | Ratio of relative methylation (TiO2-NP/Vehicle) | Sham group                       |                     |                     | TiO <sub>2</sub> -H group        |                     |                     |
|----------------|---------------------------------------------------|-------------------|------------|------------------------|-------------------------------------------------|----------------------------------|---------------------|---------------------|----------------------------------|---------------------|---------------------|
|                |                                                   |                   |            |                        |                                                 | Relative methylation (Cy-5/Cy-3) | Cy-3 signal (Input) | Cy-5 signal (MeDIP) | Relative methylation (Cy-5/Cy-3) | Cy-3 signal (Input) | Cy-5 signal (MeDIP) |
| A_68_P22407410 | chr3:107399288-107399333                          | NM_007441:1362    | Alx3       | INSIDE                 | 0.188                                           | 0.471                            | 2328.02             | 1097.46             | 0.089                            | 1540.32             | 136.72              |
| A_68_P22407412 | chr3:107399505-107399559                          | NM_007441:1584    | Alx3       | INSIDE                 | 0.262                                           | 0.590                            | 1020.05             | 601.42              | 0.155                            | 781.24              | 120.71              |
| A_68_P21424293 | chr2:91570286-91570331                            | NM_001080754:14   | Ambra1     | INSIDE                 | 0.186                                           | 0.427                            | 1821.53             | 777.97              | 0.079                            | 1444.12             | 114.72              |
| A_68_P27083331 | chr10:40021980-40022028                           | NM_009665:-10     | Amd1       | PROMOTER               | 0.209                                           | 0.490                            | 1556.69             | 763.54              | 0.103                            | 1316.87             | 135.25              |
| A_68_P27083332 | chr10:40022071-40022115                           | NM_009665:-98     | Amd1       | PROMOTER               | 0.498                                           | 0.615                            | 1393.29             | 856.67              | 0.306                            | 1096.09             | 335.78              |
| A_68_P27083334 | chr10:40022291-40022335                           | NM_009665:-318    | Amd1       | PROMOTER               | 0.453                                           | 0.540                            | 1626.28             | 877.98              | 0.245                            | 1254.26             | 306.87              |
| A_68_P27083337 | chr10:40022544-40022597                           | NM_009665:-576    | Amd1       | PROMOTER               | 0.253                                           | 0.449                            | 1427.78             | 641.68              | 0.114                            | 1062.36             | 120.88              |
| A_68_P27083323 | chr10:40020837-40020881                           | NM_007444:1134    | Amd2       | INSIDE                 | 0.476                                           | 0.678                            | 1594.46             | 1081.77             | 0.323                            | 1282.78             | 414.38              |
| A_68_P26074969 | chr8:96535449-96535505                            | NM_011787:1064    | Amfr       | INSIDE                 | 0.246                                           | 0.415                            | 1454.74             | 603.24              | 0.102                            | 1137.19             | 115.91              |
| A_68_P26074973 | chr8:96535729-96535781                            | NM_011787:786     | Amfr       | INSIDE                 | 0.166                                           | 0.400                            | 3487.11             | 1395.55             | 0.067                            | 2481.13             | 165.01              |
| A_68_P26074974 | chr8:96535812-96535856                            | NM_011787:706     | Amfr       | INSIDE                 | 0.477                                           | 0.589                            | 2100.45             | 1236.68             | 0.281                            | 1586.27             | 445.93              |
| A_68_P27285631 | chr10:80270128-80270172                           | NM_007445:2158    | Amh        | INSIDE                 | 0.616                                           | 0.443                            | 1418.57             | 628.69              | 0.273                            | 984.36              | 268.53              |
| A_68_P32710881 | chrX:139400366-139400410                          | NM_019496:883     | Ammecr1    | INSIDE                 | 0.107                                           | 2.310                            | 1482.67             | 3425.50             | 0.246                            | 578.71              | 142.39              |
| A_68_P32710884 | chrX:139400658-139400702                          | NM_019496:591     | Ammecr1    | INSIDE                 | 0.187                                           | 2.202                            | 1850.91             | 4076.51             | 0.412                            | 808.53              | 333.31              |
| A_68_P31599400 | chr18:31919398-31919452                           | NM_153515:-109    | Ammecr11   | PROMOTER               | 0.151                                           | 0.448                            | 2364.51             | 1060.24             | 0.068                            | 1841.00             | 124.67              |
| A_68_P31599403 | chr18:31919740-31919784                           | NM_153515:229     | Ammecr11   | INSIDE                 | 0.619                                           | 0.683                            | 1004.46             | 686.51              | 0.423                            | 796.59              | 337.11              |
| A_68_P28743035 | chr12:112509516-112509560                         | NM_033603:217     | Amn        | INSIDE                 | 0.234                                           | 2.192                            | 2467.95             | 5408.97             | 0.512                            | 1719.17             | 880.66              |
| A_68_P28743061 | chr12:112512577-112512621                         | NM_033603:3277    | Amn        | INSIDE                 | 0.523                                           | 0.681                            | 3901.04             | 2654.67             | 0.356                            | 2858.10             | 1018.09             |
| A_68_P28743067 | chr12:112513239-112513283                         | NM_033603:3939    | Amn        | INSIDE                 | 0.659                                           | 0.444                            | 2108.31             | 935.35              | 0.292                            | 1697.05             | 496.39              |
| A_68_P26318242 | chr9:14419308-14419352                            | NM_001081395:114  | Amot1      | INSIDE                 | 0.132                                           | 0.390                            | 2953.45             | 1152.58             | 0.052                            | 2339.58             | 120.67              |
| A_68_P26318243 | chr9:14419424-14419468                            | NM_001081395:-2   | Amot1      | PROMOTER               | 0.411                                           | 0.602                            | 873.40              | 525.70              | 0.247                            | 753.40              | 186.27              |
| A_68_P22410426 | chr3:107889144-107889188                          | NM_028779:379     | Ampd2      | INSIDE                 | 0.272                                           | 0.392                            | 1509.32             | 590.95              | 0.106                            | 1141.85             | 121.45              |
| A_68_P25415072 | chr7:117911998-117912042                          | NM_009667:-4097   | Ampd3      | PROMOTER               | 0.360                                           | 0.535                            | 1828.63             | 977.71              | 0.193                            | 1638.59             | 315.51              |
| A_68_P25415073 | chr7:117912172-117912216                          | NM_009667:-3923   | Ampd3      | PROMOTER               | 0.590                                           | 0.708                            | 1292.80             | 915.88              | 0.418                            | 1120.65             | 468.80              |
| A_68_P28118515 | chr11:109287477-109287521                         | NM_025275:239     | Amz2       | INSIDE                 | 0.154                                           | 0.616                            | 1711.81             | 1054.24             | 0.095                            | 1242.60             | 117.91              |
| A_68_P28185536 | chr11:120459969-120460013                         | NM_001038230:145  | Anapc11    | INSIDE                 | 0.445                                           | 0.675                            | 1691.06             | 1141.57             | 0.300                            | 1408.93             | 423.21              |
| A_68_P28185537 | chr11:120460129-120460181                         | NM_001038230:309  | Anapc11    | INSIDE                 | 0.204                                           | 0.523                            | 1413.86             | 738.97              | 0.106                            | 1145.06             | 121.88              |
| A_68_P27171935 | chr10:59465906-59465950                           | NM_025514:-68     | Anapc16    | DIVERGENT_PROMOTER     | 0.481                                           | 0.501                            | 2530.57             | 1266.60             | 0.241                            | 2123.48             | 510.99              |
| A_68_P21071034 | chr2:25127984-25128028                            | NM_175300:21      | Anapc2     | INSIDE                 | 0.588                                           | 0.520                            | 1814.36             | 943.09              | 0.305                            | 1493.07             | 456.13              |
| A_68_P24052416 | chr5:123271272-123271316                          | NM_001042491:54   | Anapc5     | INSIDE                 | 0.433                                           | 0.665                            | 1214.00             | 806.95              | 0.288                            | 1049.39             | 302.30              |
| A_68_P30092464 | chr15:27396409-27396457                           | NM_020332:1       | Ank        | INSIDE                 | 0.174                                           | 1.764                            | 1351.34             | 2383.72             | 0.308                            | 918.98              | 282.77              |
| A_68_P30092465 | chr15:27396520-27396564                           | NM_020332:111     | Ank        | INSIDE                 | 0.284                                           | 1.666                            | 1809.05             | 3014.71             | 0.474                            | 1329.51             | 630.30              |
| A_68_P30092466 | chr15:27396756-27396800                           | NM_020332:347     | Ank        | INSIDE                 | 0.600                                           | 0.632                            | 3710.37             | 2345.48             | 0.379                            | 2786.22             | 1055.95             |
| A_68_P30092468 | chr15:27396965-27397009                           | NM_020332:555     | Ank        | INSIDE                 | 0.250                                           | 0.418                            | 1669.18             | 698.02              | 0.104                            | 1301.10             | 135.88              |
| A_68_P25714451 | chr8:24168891-24168935                            | NM_031158:166     | Ank1       | INSIDE                 | 0.152                                           | 0.525                            | 2178.04             | 1142.55             | 0.080                            | 1552.58             | 124.11              |
| A_68_P27226083 | chr10:69285075-69285119                           | NM_146005:288641  | Ank3       | INSIDE                 | 0.606                                           | 2.579                            | 1959.05             | 5052.22             | 1.563                            | 1565.26             | 2446.25             |
| A_68_P27226084 | chr10:69285147-69285191                           | NM_146005:288713  | Ank3       | INSIDE                 | 0.666                                           | 2.148                            | 2256.07             | 4846.37             | 1.430                            | 1692.90             | 2420.42             |
| A_68_P27912780 | chr11:72503452-72503496                           | NM_009671:-29     | Ankfy1     | PROMOTER               | 0.322                                           | 1.388                            | 2307.87             | 3202.55             | 0.447                            | 1454.93             | 649.83              |
| A_68_P27912781 | chr11:72503632-72503676                           | NM_009671:151     | Ankfy1     | INSIDE                 | 0.123                                           | 0.621                            | 2038.00             | 1264.73             | 0.077                            | 1511.33             | 115.69              |
| A_68_P31624558 | chr18:36719345-36719389                           | NM_175375:-890    | Ankhd1     | PROMOTER               | 0.652                                           | 0.443                            | 1562.32             | 691.96              | 0.289                            | 1311.14             | 378.84              |
| A_68_P31624566 | chr18:36720188-36720232                           | NM_175375:-46     | Ankhd1     | PROMOTER               | 0.203                                           | 0.676                            | 1116.52             | 754.30              | 0.137                            | 874.25              | 119.67              |
| A_68_P31624569 | chr18:36720617-36720661                           | NM_175375:382     | Ankhd1     | INSIDE                 | 0.448                                           | 0.678                            | 2049.77             | 1388.83             | 0.303                            | 1603.52             | 486.33              |
| A_68_P26237598 | chr8:125565114-125565166                          | NM_001081379:1044 | Ankrd11    | INSIDE                 | 0.147                                           | 1.414                            | 991.73              | 1401.99             | 0.208                            | 769.56              | 160.26              |
| A_68_P26237607 | chr8:125566355-125566399                          | NM_001081379:-192 | Ankrd11    | PROMOTER               | 0.118                                           | 0.542                            | 2633.19             | 1426.02             | 0.064                            | 1914.55             | 122.42              |

| ProbeName       | Target position of probe on CpG island microarray | TargetID            | GeneSymbol | CpG island Description | Ratio of relative methylation (TiO2-NP/Vehicle) | Sham group                       |                     |                     | TiO <sub>2</sub> -H group        |                     |                     |
|-----------------|---------------------------------------------------|---------------------|------------|------------------------|-------------------------------------------------|----------------------------------|---------------------|---------------------|----------------------------------|---------------------|---------------------|
|                 |                                                   |                     |            |                        |                                                 | Relative methylation (Cy-5/Cy-3) | Cy-3 signal (Input) | Cy-5 signal (MeDIP) | Relative methylation (Cy-5/Cy-3) | Cy-3 signal (Input) | Cy-5 signal (MeDIP) |
| A_68_P26237608  | chr8:125566474-125566518                          | NM_001081379:-312   | Ankrd11    | PROMOTER               | 0.262                                           | 0.647                            | 2276.19             | 1472.92             | 0.170                            | 1672.48             | 283.70              |
| A_68_P22682773  | chr3:157611083-157611131                          | NM_001013806:677    | Ankrd13c   | INSIDE                 | 0.241                                           | 0.612                            | 1000.60             | 612.51              | 0.148                            | 782.41              | 115.64              |
| A_68_P31922242  | chr19:4282667-4282711                             | NM_026720:449       | Ankrd13d   | INSIDE                 | 0.569                                           | 0.487                            | 1226.66             | 597.09              | 0.277                            | 847.48              | 234.89              |
| A_68_P31922243  | chr19:4282842-4282886                             | NM_026720:273       | Ankrd13d   | INSIDE                 | 0.153                                           | 0.627                            | 3628.31             | 2276.09             | 0.096                            | 2599.10             | 249.14              |
| A_68_P21007908  | chr2:11699545-11699589                            | NM_177268:187       | Ankrd16    | INSIDE                 | 0.102                                           | 0.663                            | 2470.87             | 1638.24             | 0.067                            | 1759.34             | 118.59              |
| A_68_P21007913  | chr2:11700124-11700174                            | NM_177268:769       | Ankrd16    | INSIDE                 | 0.336                                           | 0.538                            | 1281.37             | 689.48              | 0.181                            | 928.52              | 167.72              |
| A_68_P23882634  | chr5:90794262-90794306                            | NM_030886:927       | Ankrd17    | INSIDE                 | 0.305                                           | 0.569                            | 5428.97             | 3088.89             | 0.173                            | 3740.49             | 648.30              |
| A_68_P23882635  | chr5:90794338-90794382                            | NM_030886:851       | Ankrd17    | INSIDE                 | 0.292                                           | 0.690                            | 3054.67             | 2107.60             | 0.202                            | 2236.75             | 451.10              |
| A_68_P24787430  | chr6:118512210-118512259                          | NM_001081112:40     | Ankrd26    | INSIDE                 | 0.467                                           | 0.595                            | 2127.73             | 1265.26             | 0.277                            | 1523.83             | 422.85              |
| A_68_P24787432  | chr6:118512444-118512488                          | NM_001081112:-192   | Ankrd26    | PROMOTER               | 0.373                                           | 1.366                            | 2015.02             | 2752.25             | 0.509                            | 1533.02             | 780.91              |
| A_68_P25050066  | chr7:36371059-36371104                            | NM_178263:-184      | Ankrd27    | DIVERGENT_PROMOTER     | 0.311                                           | 0.585                            | 2004.59             | 1171.95             | 0.182                            | 1608.09             | 292.19              |
| A_68_P25050069  | chr7:36371356-36371409                            | NM_178263:117       | Ankrd27    | INSIDE                 | 0.369                                           | 0.612                            | 860.19              | 526.55              | 0.226                            | 672.05              | 151.87              |
| A_68_P29514241  | chr14:32644334-32644378                           | NM_001024604:-755   | Ankrd28    | PROMOTER               | 0.645                                           | 0.404                            | 1801.85             | 728.03              | 0.260                            | 1310.82             | 341.36              |
| A_68_P30113930  | chr15:31296769-31296813                           | NM_001164441:724    | Ankrd33b   | INSIDE                 | 0.295                                           | 0.568                            | 2634.76             | 1497.79             | 0.168                            | 2118.43             | 355.51              |
| A_68_P22350123  | chr3:96401551-96401595                            | NM_001024851:1014   | Ankrd34a   | INSIDE                 | 0.659                                           | 0.357                            | 1442.42             | 514.58              | 0.235                            | 1071.90             | 251.88              |
| A_68_P22350131  | chr3:96402359-96402403                            | NM_001024851:1822   | Ankrd34a   | INSIDE                 | 0.223                                           | 0.644                            | 1039.90             | 669.76              | 0.144                            | 816.36              | 117.23              |
| A_68_P22350132  | chr3:96402437-96402481                            | NM_001024851:1900   | Ankrd34a   | INSIDE                 | 0.656                                           | 0.660                            | 2265.19             | 1495.18             | 0.433                            | 1805.69             | 781.54              |
| A_68_P22350134  | chr3:96402650-96402694                            | NM_001024851:2114   | Ankrd34a   | INSIDE                 | 0.167                                           | 0.582                            | 1875.84             | 1091.15             | 0.097                            | 1435.18             | 139.49              |
| A_68_P29223867  | chr13:93195722-93195766                           | NM_175455:-179      | Ankrd34b   | PROMOTER               | 0.269                                           | 0.357                            | 2515.33             | 897.35              | 0.096                            | 2137.69             | 204.90              |
| A_68_P25833743  | chr8:47085442-47085486                            | NM_001039562:-260   | Ankrd37    | PROMOTER               | 0.237                                           | 0.688                            | 2837.34             | 1953.45             | 0.163                            | 2115.47             | 345.86              |
| A_68_P25833744  | chr8:47085514-47085558                            | NM_001039562:-332   | Ankrd37    | PROMOTER               | 0.162                                           | 0.659                            | 6235.37             | 4107.47             | 0.107                            | 4090.02             | 436.65              |
| A_68_P20148960  | chr1:36604078-36604122                            | NM_026241:-54       | Ankrd39    | PROMOTER               | 0.437                                           | 0.390                            | 1415.38             | 551.80              | 0.170                            | 1034.18             | 176.20              |
| A_68_P28032140  | chr11:94189670-94189714                           | NM_146024:378       | Ankrd40    | INSIDE                 | 0.563                                           | 0.532                            | 4088.05             | 2175.64             | 0.299                            | 2843.43             | 851.43              |
| A_68_P20239573  | chr1:54982711-54982755                            | NM_001081433:499    | Ankrd44    | INSIDE                 | 0.301                                           | 0.566                            | 2291.09             | 1296.37             | 0.170                            | 1823.89             | 310.36              |
| A_68_P20239575  | chr1:54982981-54983025                            | NM_001081433:229    | Ankrd44    | INSIDE                 | 0.506                                           | 0.502                            | 1728.21             | 868.19              | 0.254                            | 1361.37             | 345.90              |
| A_68_P20770261  | chr1:163073112-163073156                          | NM_028664:292       | Ankrd45    | INSIDE                 | 0.268                                           | 0.453                            | 1294.84             | 586.81              | 0.121                            | 972.84              | 118.12              |
| A_68_P20770398  | chr1:163101115-163101159                          | NM_028664:28294     | Ankrd45    | DOWNSTREAM             | 0.367                                           | 0.706                            | 2741.32             | 1934.83             | 0.259                            | 2206.06             | 571.18              |
| A_68_P30138905  | chr15:36426080-36426131                           | NM_175134:441       | Ankrd46    | INSIDE                 | 0.249                                           | 0.446                            | 1354.38             | 603.41              | 0.111                            | 1065.59             | 118.07              |
| A_68_P22069323  | chr3:38354784-38354828                            | NM_001167883:28932  | Ankrd50    | INSIDE                 | 0.607                                           | 2.767                            | 733.56              | 2029.72             | 1.680                            | 686.76              | 1153.66             |
| A_68_P22069523  | chr3:38383943-38383987                            | NM_001167883:-226   | Ankrd50    | PROMOTER               | 0.142                                           | 1.541                            | 10968.42            | 16902.02            | 0.218                            | 7499.82             | 1638.58             |
| A_68_P23897548  | chr5:93473182-93473226                            | NM_175270:844       | Ankrd56    | INSIDE                 | 0.536                                           | 0.504                            | 2230.22             | 1123.66             | 0.270                            | 1844.26             | 498.19              |
| A_68_P23897552  | chr5:93473776-93473820                            | NM_175270:250       | Ankrd56    | INSIDE                 | 0.323                                           | 0.413                            | 1290.56             | 532.86              | 0.133                            | 1022.51             | 136.49              |
| A_68_P32321493  | chrX:34588727-34588771                            | NM_173779:-91       | Ankrd58    | PROMOTER               | 0.114                                           | 1.501                            | 4199.39             | 6302.27             | 0.171                            | 1810.12             | 309.98              |
| A_68_P32321494  | chrX:34588841-34588885                            | NM_173779:23        | Ankrd58    | INSIDE                 | 0.129                                           | 2.083                            | 923.08              | 1923.07             | 0.268                            | 435.96              | 116.80              |
| A_68_P31119198  | chr17:28046785-28046829                           | NM_181413:522       | Anks1      | INSIDE                 | 0.288                                           | 0.366                            | 1475.23             | 539.44              | 0.105                            | 1139.79             | 119.99              |
| A_68_P27333413  | chr10:89335981-89336025                           | NM_001128086:-251   | Anks1b     | PROMOTER               | 0.373                                           | 0.631                            | 849.39              | 535.69              | 0.235                            | 736.94              | 173.20              |
| A_68_P273334198 | chr10:89512597-89512641                           | NM_001128086:176365 | Anks1b     | INSIDE                 | 0.652                                           | 3.116                            | 369.75              | 1152.02             | 2.032                            | 365.58              | 743.02              |
| A_68_P30512950  | chr16:4964504-4964548                             | NM_028301:-196      | Anks3      | PROMOTER               | 0.263                                           | 0.484                            | 3576.27             | 1730.55             | 0.127                            | 2482.98             | 316.07              |
| A_68_P30512951  | chr16:4964673-4964717                             | NM_028301:-364      | Anks3      | PROMOTER               | 0.449                                           | 0.465                            | 1447.41             | 672.81              | 0.209                            | 1062.93             | 221.98              |
| A_68_P26351649  | chr9:22193381-22193425                            | NM_028390:248       | Anln       | INSIDE                 | 0.581                                           | 0.534                            | 2202.16             | 1176.53             | 0.311                            | 1832.55             | 569.23              |
| A_68_P26351650  | chr9:22193454-22193498                            | NM_028390:174       | Anln       | INSIDE                 | 0.228                                           | 0.582                            | 1163.79             | 677.46              | 0.132                            | 892.77              | 118.28              |
| A_68_P26888668  | chr9:122203107-122203151                          | NM_133979:364       | Ano10      | INSIDE                 | 0.331                                           | 0.662                            | 988.54              | 654.43              | 0.219                            | 827.93              | 181.41              |
| A_68_P26888672  | chr9:122203588-122203632                          | NM_133979:-118      | Ano10      | PROMOTER               | 0.277                                           | 0.602                            | 3002.32             | 1807.81             | 0.167                            | 2427.02             | 404.99              |
| A_68_P26888673  | chr9:122203754-122203798                          | NM_133979:-284      | Ano10      | PROMOTER               | 0.326                                           | 1.412                            | 6995.73             | 9875.00             | 0.460                            | 4283.64             | 1970.44             |

| ProbeName      | Target position of probe on CpG island microarray | TargetID           | GeneSymbol | CpG island Description | Ratio of relative methylation (TiO2-NP/Vehicle) | Sham group                       |                     |                     | TiO <sub>2</sub> -H group        |                     |                     |
|----------------|---------------------------------------------------|--------------------|------------|------------------------|-------------------------------------------------|----------------------------------|---------------------|---------------------|----------------------------------|---------------------|---------------------|
|                |                                                   |                    |            |                        |                                                 | Relative methylation (Cy-5/Cy-3) | Cy-3 signal (Input) | Cy-5 signal (MeDIP) | Relative methylation (Cy-5/Cy-3) | Cy-3 signal (Input) | Cy-5 signal (MeDIP) |
| A_68_P25123372 | chr7:58766676-58766720                            | NM_177694:300      | Ano5       | INSIDE                 | 0.187                                           | 0.542                            | 1536.46             | 832.27              | 0.101                            | 1188.28             | 120.37              |
| A_68_P30459963 | chr15:95621546-95621590                           | NM_175344:295      | Ano6       | INSIDE                 | 0.475                                           | 0.516                            | 2300.58             | 1186.50             | 0.245                            | 1680.35             | 411.74              |
| A_68_P20455320 | chr1:95297981-95298025                            | NM_207031:27530    | Ano7       | INSIDE                 | 0.481                                           | 0.652                            | 1115.64             | 727.50              | 0.313                            | 903.76              | 283.23              |
| A_68_P26569949 | chr9:62188962-62189006                            | NM_009672:-165     | Anp32a     | PROMOTER               | 0.275                                           | 0.481                            | 3395.66             | 1634.79             | 0.132                            | 2513.84             | 332.86              |
| A_68_P26569951 | chr9:62189186-62189230                            | NM_009672:59       | Anp32a     | INSIDE                 | 0.260                                           | 0.687                            | 1240.19             | 851.51              | 0.178                            | 844.25              | 150.60              |
| A_68_P26569953 | chr9:62189357-62189414                            | NM_009672:236      | Anp32a     | INSIDE                 | 0.131                                           | 1.346                            | 3294.51             | 4435.43             | 0.176                            | 2266.30             | 399.76              |
| A_68_P26569954 | chr9:62189473-62189517                            | NM_009672:345      | Anp32a     | INSIDE                 | 0.124                                           | 2.725                            | 6282.22             | 17120.84            | 0.338                            | 4433.06             | 1500.03             |
| A_68_P26569955 | chr9:62189553-62189597                            | NM_009672:425      | Anp32a     | INSIDE                 | 0.288                                           | 2.218                            | 7454.98             | 16534.36            | 0.638                            | 4783.60             | 3051.89             |
| A_68_P26569958 | chr9:62189997-62190041                            | NM_009672:869      | Anp32a     | INSIDE                 | 0.163                                           | 0.550                            | 2442.60             | 1342.26             | 0.090                            | 1711.46             | 153.46              |
| A_68_P26569970 | chr9:62191389-62191433                            | NM_009672:2261     | Anp32a     | INSIDE                 | 0.256                                           | 0.376                            | 1923.03             | 723.35              | 0.096                            | 1579.92             | 151.98              |
| A_68_P26569979 | chr9:62192471-62192515                            | NM_009672:3343     | Anp32a     | INSIDE                 | 0.183                                           | 0.455                            | 1803.17             | 820.29              | 0.083                            | 1410.16             | 117.37              |
| A_68_P22346423 | chr3:95733097-95733141                            | NM_023210:-61      | Anp32e     | PROMOTER               | 0.458                                           | 0.579                            | 1126.65             | 652.73              | 0.265                            | 910.30              | 241.52              |
| A_68_P22346424 | chr3:95733202-95733246                            | NM_023210:45       | Anp32e     | INSIDE                 | 0.091                                           | 0.587                            | 3302.07             | 1939.57             | 0.053                            | 2484.57             | 132.32              |
| A_68_P22346556 | chr3:95755077-95755121                            | NM_023210:21919    | Anp32e     | DOWNSTREAM             | 0.345                                           | 0.701                            | 3316.82             | 2325.71             | 0.242                            | 2505.96             | 606.98              |
| A_68_P29480018 | chr14:26661840-26661884                           | NM_013469:222      | Anxa1      | INSIDE                 | 0.316                                           | 0.637                            | 1341.51             | 853.91              | 0.201                            | 1069.02             | 215.21              |
| A_68_P29480020 | chr14:26662064-26662110                           | NM_013469:446      | Anxa1      | INSIDE                 | 0.329                                           | 0.534                            | 1751.87             | 934.91              | 0.176                            | 1452.69             | 255.29              |
| A_68_P22058283 | chr3:36374398-36374443                            | NM_009673:389      | Anxa5      | INSIDE                 | 0.460                                           | 0.527                            | 1028.66             | 542.16              | 0.243                            | 753.08              | 182.64              |
| A_68_P22058284 | chr3:36374544-36374588                            | NM_009673:243      | Anxa5      | INSIDE                 | 0.124                                           | 0.607                            | 2100.48             | 1274.01             | 0.075                            | 1531.04             | 115.44              |
| A_68_P22058285 | chr3:36374705-36374749                            | NM_009673:83       | Anxa5      | INSIDE                 | 0.356                                           | 0.531                            | 2081.16             | 1105.66             | 0.189                            | 1468.31             | 277.93              |
| A_68_P22510975 | chr3:127540105-127540149                          | NM_145964:284      | Ap1ar      | INSIDE                 | 0.591                                           | 0.647                            | 1969.64             | 1275.09             | 0.383                            | 1545.85             | 591.83              |
| A_68_P27560708 | chr11:4887125-4887169                             | NM_007454:239      | Ap1b1      | INSIDE                 | 0.489                                           | 0.697                            | 4765.26             | 3323.48             | 0.341                            | 3644.17             | 1241.86             |
| A_68_P27560709 | chr11:4887252-4887296                             | NM_007454:367      | Ap1b1      | INSIDE                 | 0.431                                           | 0.512                            | 2650.54             | 1356.04             | 0.221                            | 1850.24             | 408.37              |
| A_68_P27560710 | chr11:4887330-4887374                             | NM_007454:445      | Ap1b1      | INSIDE                 | 0.307                                           | 0.582                            | 2095.62             | 1219.07             | 0.178                            | 1429.47             | 255.06              |
| A_68_P25960288 | chr8:74763954-74763998                            | NM_007456:-54      | Ap1m1      | PROMOTER               | 0.224                                           | 0.419                            | 1594.49             | 668.04              | 0.094                            | 1274.85             | 119.73              |
| A_68_P32795512 | chrX:160346535-160346579                          | NM_026887:-535     | Ap1s2      | PROMOTER               | 0.098                                           | 1.570                            | 2884.52             | 4528.49             | 0.155                            | 1094.51             | 169.22              |
| A_68_P32795517 | chrX:160347213-160347257                          | NM_026887:143      | Ap1s2      | INSIDE                 | 0.295                                           | 2.033                            | 1837.35             | 3735.54             | 0.599                            | 901.22              | 540.07              |
| A_68_P32795520 | chrX:160347620-160347664                          | NM_026887:551      | Ap1s2      | INSIDE                 | 0.387                                           | 1.410                            | 2493.78             | 3516.61             | 0.546                            | 1204.55             | 657.69              |
| A_68_P20377068 | chr1:79668401-79668445                            | NM_183027:125      | Ap1s3      | INSIDE                 | 0.523                                           | 0.705                            | 2389.03             | 1683.13             | 0.369                            | 1803.25             | 665.03              |
| A_68_P25090207 | chr7:52184463-52184510                            | NM_001077264:374   | Ap2a1      | INSIDE                 | 0.243                                           | 0.639                            | 1123.22             | 717.46              | 0.155                            | 829.36              | 128.78              |
| A_68_P25090210 | chr7:52184875-52184919                            | NM_001077264:-36   | Ap2a1      | PROMOTER               | 0.487                                           | 0.497                            | 1125.86             | 559.74              | 0.242                            | 850.21              | 205.95              |
| A_68_P25090211 | chr7:52184951-52185005                            | NM_001077264:-118  | Ap2a1      | PROMOTER               | 0.254                                           | 0.636                            | 1021.77             | 649.55              | 0.162                            | 733.63              | 118.69              |
| A_68_P27970639 | chr11:83116144-83116188                           | NM_001035854:-32   | Ap2b1      | DIVERGENT_PROMOTER     | 0.266                                           | 0.337                            | 1694.36             | 570.46              | 0.090                            | 1348.12             | 120.78              |
| A_68_P27970640 | chr11:83116209-83116256                           | NM_001035854:34    | Ap2b1      | INSIDE                 | 0.288                                           | 0.506                            | 1137.54             | 576.09              | 0.146                            | 795.64              | 115.97              |
| A_68_P27970642 | chr11:83116490-83116534                           | NM_001035854:314   | Ap2b1      | INSIDE                 | 0.412                                           | 0.613                            | 1542.09             | 945.94              | 0.253                            | 1146.43             | 289.90              |
| A_68_P29234318 | chr13:95128761-95128805                           | NM_009680:-132     | Ap3b1      | PROMOTER               | 0.107                                           | 0.733                            | 2427.48             | 1778.62             | 0.078                            | 1583.23             | 124.13              |
| A_68_P29234321 | chr13:95129057-95129101                           | NM_009680:164      | Ap3b1      | INSIDE                 | 0.300                                           | 0.707                            | 1455.47             | 1028.55             | 0.212                            | 1162.74             | 246.57              |
| A_68_P29234322 | chr13:95129157-95129201                           | NM_009680:264      | Ap3b1      | INSIDE                 | 0.331                                           | 0.633                            | 2204.00             | 1395.02             | 0.210                            | 1681.11             | 352.45              |
| A_68_P25712955 | chr8:23915948-23915992                            | NM_001122820:156   | Ap3m2      | INSIDE                 | 0.405                                           | 0.626                            | 938.42              | 587.32              | 0.253                            | 785.72              | 199.13              |
| A_68_P21611139 | chr2:126834542-126834586                          | NM_175550:118      | Ap4e1      | INSIDE                 | 0.387                                           | 0.559                            | 2168.56             | 1211.45             | 0.216                            | 1837.20             | 397.00              |
| A_68_P28431152 | chr12:52792067-52792111                           | NM_021710:136      | Ap4s1      | INSIDE                 | 0.350                                           | 0.599                            | 1966.91             | 1177.34             | 0.209                            | 1515.36             | 317.08              |
| A_68_P32019520 | chr19:23832652-23832703                           | NM_177034:-688     | Apba1      | PROMOTER               | 0.285                                           | 0.633                            | 849.54              | 537.40              | 0.180                            | 663.11              | 119.36              |
| A_68_P23763025 | chr5:67011439-67011483                            | NM_001201413:-1404 | Apbb2      | PROMOTER               | 0.180                                           | 0.645                            | 5037.93             | 3247.43             | 0.116                            | 4030.61             | 468.32              |
| A_68_P31625260 | chr18:36839170-36839214                           | NM_146085:-172     | Apbb3      | PROMOTER               | 0.231                                           | 1.575                            | 1739.12             | 2739.35             | 0.364                            | 1216.07             | 442.92              |
| A_68_P29599143 | chr14:51544686-51544730                           | NM_009687:85       | Apex1      | INSIDE                 | 0.316                                           | 0.568                            | 1054.30             | 599.15              | 0.180                            | 808.85              | 145.22              |

| ProbeName      | Target position of probe on CpG island microarray | TargetID          | GeneSymbol | CpG island Description | Ratio of relative methylation (TiO2-NP/Vehicle) | Sham group                       |                     |                     | TiO <sub>2</sub> -H group        |                     |                     |
|----------------|---------------------------------------------------|-------------------|------------|------------------------|-------------------------------------------------|----------------------------------|---------------------|---------------------|----------------------------------|---------------------|---------------------|
|                |                                                   |                   |            |                        |                                                 | Relative methylation (Cy-5/Cy-3) | Cy-3 signal (Input) | Cy-5 signal (MeDIP) | Relative methylation (Cy-5/Cy-3) | Cy-3 signal (Input) | Cy-5 signal (MeDIP) |
| A_68_P22346233 | chr3:95698306-95698355                            | NM_146134:353     | Aph1a      | INSIDE                 | 0.236                                           | 0.541                            | 1344.79             | 728.00              | 0.128                            | 960.83              | 122.67              |
| A_68_P26595209 | chr9:66643358-66643402                            | NM_177583:-150    | Aph1b      | PROMOTER               | 0.226                                           | 0.460                            | 1352.03             | 621.39              | 0.104                            | 1192.41             | 123.65              |
| A_68_P26595210 | chr9:66643453-66643497                            | NM_177583:-244    | Aph1b      | PROMOTER               | 0.243                                           | 0.391                            | 1839.09             | 719.38              | 0.095                            | 1408.54             | 133.93              |
| A_68_P26595212 | chr9:66643626-66643670                            | NM_177583:-418    | Aph1b      | PROMOTER               | 0.273                                           | 0.575                            | 2855.08             | 1642.69             | 0.157                            | 2129.20             | 334.72              |
| A_68_P26595214 | chr9:66643808-66643852                            | NM_177583:-600    | Aph1b      | PROMOTER               | 0.348                                           | 0.523                            | 1276.14             | 666.86              | 0.182                            | 948.74              | 172.32              |
| A_68_P26595468 | chr9:66682422-66682466                            | NM_026674:69      | Aph1c      | INSIDE                 | 0.154                                           | 0.471                            | 3924.39             | 1849.39             | 0.073                            | 2883.89             | 209.19              |
| A_68_P26595469 | chr9:66682493-66682537                            | NM_026674:-1      | Aph1c      | PROMOTER               | 0.616                                           | 0.722                            | 1603.34             | 1157.12             | 0.445                            | 1297.80             | 577.33              |
| A_68_P26595470 | chr9:66682593-66682637                            | NM_026674:-101    | Aph1c      | PROMOTER               | 0.524                                           | 0.575                            | 3493.70             | 2008.35             | 0.301                            | 2816.28             | 848.41              |
| A_68_P26595471 | chr9:66682687-66682731                            | NM_026674:-195    | Aph1c      | PROMOTER               | 0.172                                           | 0.609                            | 1452.99             | 884.84              | 0.105                            | 1197.01             | 125.27              |
| A_68_P26595472 | chr9:66682802-66682846                            | NM_026674:-311    | Aph1c      | PROMOTER               | 0.554                                           | 0.564                            | 2116.14             | 1193.05             | 0.312                            | 1592.91             | 497.13              |
| A_68_P26595474 | chr9:66683005-66683049                            | NM_026674:-513    | Aph1c      | PROMOTER               | 0.221                                           | 0.571                            | 2018.53             | 1153.26             | 0.126                            | 1774.12             | 223.63              |
| A_68_P26595475 | chr9:66683088-66683132                            | NM_026674:-597    | Aph1c      | PROMOTER               | 0.533                                           | 0.569                            | 3058.67             | 1739.29             | 0.303                            | 2286.37             | 693.61              |
| A_68_P21441211 | chr2:94277500-94277544                            | NM_007466:782     | Api5       | INSIDE                 | 0.265                                           | 0.417                            | 1244.17             | 518.83              | 0.111                            | 1103.43             | 121.96              |
| A_68_P21481086 | chr2:102914077-102914121                          | NM_019735:267     | Apip       | INSIDE                 | 0.642                                           | 0.564                            | 964.81              | 544.20              | 0.362                            | 866.22              | 313.63              |
| A_68_P26399345 | chr9:31019701-31019745                            | NM_001102455:-322 | Apip2      | PROMOTER               | 0.612                                           | 0.534                            | 1052.03             | 561.48              | 0.327                            | 829.63              | 271.20              |
| A_68_P22311543 | chr3:87862306-87862350                            | NM_144897:89      | Apoa1bp    | INSIDE                 | 0.667                                           | 0.475                            | 2288.20             | 1085.86             | 0.317                            | 1695.77             | 537.05              |
| A_68_P30927982 | chr16:85173354-85173398                           | NM_001198823:576  | App        | INSIDE                 | 0.225                                           | 0.442                            | 1681.20             | 742.41              | 0.100                            | 1203.18             | 119.72              |
| A_68_P27981860 | chr11:85048235-85048279                           | NM_025825:366     | Appbp2     | INSIDE                 | 0.297                                           | 0.566                            | 1614.72             | 914.38              | 0.168                            | 1238.42             | 208.60              |
| A_68_P29484376 | chr14:27783003-27783055                           | NM_145221:709     | App11      | INSIDE                 | 0.092                                           | 0.665                            | 2691.53             | 1789.55             | 0.061                            | 1896.03             | 116.17              |
| A_68_P29484385 | chr14:27783967-27784011                           | NM_145221:-251    | App11      | PROMOTER               | 0.425                                           | 0.571                            | 1575.58             | 900.31              | 0.243                            | 1334.00             | 323.64              |
| A_68_P26234301 | chr8:125100388-125100432                          | NM_009698:397     | Aprt       | INSIDE                 | 0.223                                           | 0.607                            | 2351.89             | 1427.00             | 0.135                            | 1568.82             | 211.96              |
| A_68_P26234304 | chr8:125100653-125100697                          | NM_009698:133     | Aprt       | INSIDE                 | 0.115                                           | 0.744                            | 4203.02             | 3125.02             | 0.086                            | 3182.83             | 273.05              |
| A_68_P26234306 | chr8:125100834-125100878                          | NM_009698:-49     | Aprt       | PROMOTER               | 0.618                                           | 2.571                            | 9686.04             | 24899.64            | 1.589                            | 6517.89             | 10354.67            |
| A_68_P26234307 | chr8:125100918-125100973                          | NM_009698:-138    | Aprt       | PROMOTER               | 0.049                                           | 1.853                            | 2008.98             | 3722.06             | 0.091                            | 1303.90             | 119.25              |
| A_68_P22858339 | chr4:40650160-40650206                            | NM_025545:-233    | Aptx       | PROMOTER               | 0.291                                           | 0.556                            | 3699.17             | 2057.41             | 0.162                            | 2715.18             | 439.07              |
| A_68_P25352107 | chr7:104886338-104886382                          | NM_175105:397     | Aqp11      | INSIDE                 | 0.180                                           | 0.737                            | 2131.95             | 1571.00             | 0.133                            | 1621.23             | 215.26              |
| A_68_P25352110 | chr7:104886718-104886762                          | NM_175105:17      | Aqp11      | INSIDE                 | 0.328                                           | 0.687                            | 3990.52             | 2741.02             | 0.226                            | 3126.19             | 705.20              |
| A_68_P25352112 | chr7:104886923-104886967                          | NM_175105:-187    | Aqp11      | PROMOTER               | 0.268                                           | 0.580                            | 1006.01             | 583.48              | 0.155                            | 776.88              | 120.66              |
| A_68_P22860480 | chr4:41045173-41045217                            | NM_016689:22      | Aqp3       | INSIDE                 | 0.234                                           | 0.480                            | 1320.46             | 633.38              | 0.112                            | 1077.59             | 120.80              |
| A_68_P27835624 | chr11:59040902-59040946                           | NM_001130408:740  | Arf1       | INSIDE                 | 0.511                                           | 0.617                            | 2545.03             | 1569.28             | 0.315                            | 1884.92             | 593.33              |
| A_68_P27835626 | chr11:59041120-59041164                           | NM_001130408:522  | Arf1       | INSIDE                 | 0.313                                           | 0.455                            | 1172.79             | 533.81              | 0.143                            | 912.01              | 130.09              |
| A_68_P28088312 | chr11:103827831-103827875                         | NM_007477:-332    | Arf2       | PROMOTER               | 0.180                                           | 0.522                            | 1991.90             | 1038.99             | 0.094                            | 1486.10             | 139.51              |
| A_68_P30476324 | chr15:98593039-98593083                           | NM_007478:489     | Arf3       | INSIDE                 | 0.095                                           | 1.584                            | 2749.81             | 4356.37             | 0.151                            | 1835.59             | 277.20              |
| A_68_P30476325 | chr15:98593156-98593200                           | NM_007478:371     | Arf3       | INSIDE                 | 0.434                                           | 0.661                            | 4392.11             | 2903.33             | 0.287                            | 3220.23             | 924.08              |
| A_68_P30476329 | chr15:98593570-98593614                           | NM_007478:-43     | Arf3       | PROMOTER               | 0.576                                           | 0.556                            | 2638.09             | 1467.56             | 0.320                            | 2215.02             | 709.90              |
| A_68_P30476330 | chr15:98593656-98593700                           | NM_007478:-129    | Arf3       | PROMOTER               | 0.225                                           | 0.595                            | 1091.17             | 649.54              | 0.134                            | 882.99              | 118.50              |
| A_68_P30476331 | chr15:98593814-98593858                           | NM_007478:-287    | Arf3       | PROMOTER               | 0.529                                           | 0.434                            | 1932.01             | 839.28              | 0.230                            | 1535.45             | 352.93              |
| A_68_P29482769 | chr14:27457424-27457468                           | NM_007479:-236    | Arf4       | PROMOTER               | 0.226                                           | 0.645                            | 3679.84             | 2373.45             | 0.146                            | 2565.68             | 374.55              |
| A_68_P21907441 | chr2:180701664-180701708                          | NM_001177707:-243 | Arfgap1    | PROMOTER               | 0.444                                           | 0.549                            | 1007.37             | 552.64              | 0.244                            | 750.71              | 182.98              |
| A_68_P21421623 | chr2:91105084-91105140                            | NM_001166024:-159 | Arfgap2    | PROMOTER               | 0.238                                           | 0.543                            | 1243.22             | 674.75              | 0.129                            | 926.35              | 119.58              |
| A_68_P21421624 | chr2:91105178-91105222                            | NM_001166024:-71  | Arfgap2    | PROMOTER               | 0.370                                           | 0.643                            | 1051.41             | 676.43              | 0.238                            | 865.43              | 206.21              |
| A_68_P21421625 | chr2:91105340-91105384                            | NM_001166024:91   | Arfgap2    | INSIDE                 | 0.495                                           | 0.604                            | 1291.45             | 779.89              | 0.299                            | 948.79              | 283.61              |
| A_68_P20026598 | chr1:10222127-10222186                            | NM_001102430:595  | Arfgef1    | INSIDE                 | 0.143                                           | 1.528                            | 1118.22             | 1708.68             | 0.218                            | 795.12              | 173.60              |
| A_68_P20026601 | chr1:10222483-10222527                            | NM_001102430:247  | Arfgef1    | INSIDE                 | 0.181                                           | 0.586                            | 1307.97             | 766.37              | 0.106                            | 1126.76             | 119.19              |

| ProbeName      | Target position of probe on CpG island microarray | TargetID           | GeneSymbol | CpG island Description | Ratio of relative methylation (TiO2-NP/Vehicle) | Sham group                       |                     |                     | TiO <sub>2</sub> -H group        |                     |                     |
|----------------|---------------------------------------------------|--------------------|------------|------------------------|-------------------------------------------------|----------------------------------|---------------------|---------------------|----------------------------------|---------------------|---------------------|
|                |                                                   |                    |            |                        |                                                 | Relative methylation (Cy-5/Cy-3) | Cy-3 signal (Input) | Cy-5 signal (MeDIP) | Relative methylation (Cy-5/Cy-3) | Cy-3 signal (Input) | Cy-5 signal (MeDIP) |
| A_68_P22291856 | chr3:84386605-84386649                            | NM_001081093:-79   | Arfp1      | PROMOTER               | 0.430                                           | 0.554                            | 1121.05             | 621.23              | 0.238                            | 1009.01             | 240.25              |
| A_68_P22291860 | chr3:84387008-84387052                            | NM_001081093:-483  | Arfp1      | PROMOTER               | 0.448                                           | 0.631                            | 1815.87             | 1146.56             | 0.283                            | 1516.57             | 428.80              |
| A_68_P28567750 | chr12:80231609-80231653                           | NM_009705:-144     | Arg2       | PROMOTER               | 0.499                                           | 0.548                            | 1062.12             | 582.11              | 0.273                            | 855.37              | 233.72              |
| A_68_P21423815 | chr2:91490335-91490379                            | NM_146124:-3008    | Arhgap1    | PROMOTER               | 0.433                                           | 0.569                            | 991.08              | 563.92              | 0.246                            | 809.93              | 199.52              |
| A_68_P25484114 | chr7:130514088-130514135                          | NM_001122640:-682  | Arhgap17   | DIVERGENT_PROMOTER     | 0.129                                           | 0.670                            | 1932.37             | 1294.52             | 0.086                            | 1376.75             | 118.92              |
| A_68_P32117276 | chr19:41876224-41876268                           | NM_001163495:328   | Arhgap19   | INSIDE                 | 0.617                                           | 0.495                            | 1654.12             | 818.59              | 0.305                            | 1309.43             | 399.97              |
| A_68_P26511318 | chr9:51574321-51574365                            | NM_175535:886      | Arhgap20   | INSIDE                 | 0.123                                           | 0.651                            | 2394.91             | 1559.34             | 0.080                            | 1801.54             | 143.76              |
| A_68_P21052780 | chr2:20889683-20889727                            | NM_001081364:-356  | Arhgap21   | DIVERGENT_PROMOTER     | 0.264                                           | 0.377                            | 1771.21             | 667.53              | 0.099                            | 1252.59             | 124.43              |
| A_68_P29523611 | chr14:34164707-34164753                           | NM_153800:134722   | Arhgap22   | INSIDE                 | 0.115                                           | 1.439                            | 1301.16             | 1872.93             | 0.166                            | 902.64              | 149.45              |
| A_68_P28050587 | chr11:97302015-97302059                           | NM_021493:-9437    | Arhgap23   | PROMOTER               | 0.197                                           | 0.691                            | 2072.10             | 1432.11             | 0.136                            | 1536.39             | 208.76              |
| A_68_P28050588 | chr11:97302102-97302146                           | NM_021493:-9349    | Arhgap23   | PROMOTER               | 0.159                                           | 0.685                            | 1509.05             | 1033.98             | 0.109                            | 1098.69             | 119.55              |
| A_68_P28050942 | chr11:97361786-97361830                           | NM_021493:50335    | Arhgap23   | INSIDE                 | 0.542                                           | 0.664                            | 2050.85             | 1360.95             | 0.359                            | 1674.22             | 601.87              |
| A_68_P31637164 | chr18:39152519-39152563                           | NM_175164:-258     | Arhgap26   | PROMOTER               | 0.410                                           | 0.725                            | 1703.48             | 1234.31             | 0.297                            | 1219.68             | 361.91              |
| A_68_P28084858 | chr11:103222146-103222190                         | NM_001205236:2838  | Arhgap27   | INSIDE                 | 0.603                                           | 0.558                            | 1261.80             | 703.64              | 0.337                            | 945.53              | 318.21              |
| A_68_P22479596 | chr3:121656435-121656479                          | NM_172525:213      | Arhgap29   | INSIDE                 | 0.650                                           | 0.600                            | 1067.93             | 640.26              | 0.390                            | 917.44              | 357.48              |
| A_68_P25032018 | chr7:31320141-31320185                            | NM_178252:-134     | Arhgap33   | PROMOTER               | 0.276                                           | 0.419                            | 1337.10             | 559.89              | 0.116                            | 1014.16             | 117.21              |
| A_68_P32369309 | chrX:46847140-46847184                            | NM_001081123:23536 | Arhgap36   | INSIDE                 | 0.091                                           | 1.831                            | 3852.82             | 7054.90             | 0.166                            | 1444.40             | 240.23              |
| A_68_P30350784 | chr15:76648087-76648131                           | NM_001168288:492   | Arhgap39   | INSIDE                 | 0.116                                           | 5.436                            | 21824.95            | 118649.00           | 0.632                            | 14501.69            | 9161.22             |
| A_68_P30350785 | chr15:76648219-76648263                           | NM_001168288:360   | Arhgap39   | INSIDE                 | 0.248                                           | 1.361                            | 6207.90             | 8446.78             | 0.337                            | 4429.15             | 1492.51             |
| A_68_P25007188 | chr7:25689481-25689525                            | NM_001130152:138   | Arhgef1    | INSIDE                 | 0.147                                           | 0.653                            | 1911.53             | 1247.54             | 0.096                            | 1358.90             | 130.04              |
| A_68_P25677405 | chr8:14911386-14911430                            | NM_001037736:-308  | Arhgef10   | PROMOTER               | 0.151                                           | 0.581                            | 2206.29             | 1282.91             | 0.088                            | 1550.03             | 136.06              |
| A_68_P25677406 | chr8:14911525-14911569                            | NM_001037736:-170  | Arhgef10   | PROMOTER               | 0.480                                           | 0.642                            | 1548.94             | 993.75              | 0.308                            | 1391.38             | 428.63              |
| A_68_P25677407 | chr8:14911603-14911647                            | NM_001037736:-92   | Arhgef10   | PROMOTER               | 0.514                                           | 0.531                            | 2007.66             | 1065.07             | 0.273                            | 1585.43             | 432.17              |
| A_68_P26459683 | chr9:42913398-42913453                            | NM_027144:376      | Arhgef12   | INSIDE                 | 0.190                                           | 0.544                            | 1537.57             | 835.73              | 0.103                            | 1139.07             | 117.86              |
| A_68_P23430517 | chr4:153673893-153673937                          | NM_001112744:90    | Arhgef16   | INSIDE                 | 0.427                                           | 0.712                            | 1902.35             | 1355.25             | 0.304                            | 1498.03             | 456.01              |
| A_68_P23430519 | chr4:153674176-153674220                          | NM_001112744:-194  | Arhgef16   | PROMOTER               | 0.275                                           | 0.426                            | 3011.20             | 1283.74             | 0.117                            | 2347.81             | 275.15              |
| A_68_P25370485 | chr7:108080406-108080454                          | NM_001081116:245   | Arhgef17   | INSIDE                 | 0.307                                           | 0.324                            | 1617.44             | 524.46              | 0.099                            | 1238.33             | 123.19              |
| A_68_P22314832 | chr3:88425175-88425219                            | NM_001198912:-119  | Arhgef2    | PROMOTER               | 0.603                                           | 0.440                            | 1225.51             | 538.80              | 0.265                            | 984.79              | 261.27              |
| A_68_P27534513 | chr10:126626792-126626847                         | NM_001166413:60    | Arhgef25   | INSIDE                 | 0.051                                           | 1.389                            | 2672.40             | 3710.76             | 0.071                            | 1699.16             | 120.72              |
| A_68_P27534515 | chr10:126627015-126627059                         | NM_001166413:-157  | Arhgef25   | PROMOTER               | 0.660                                           | 0.701                            | 1586.51             | 1112.37             | 0.463                            | 1074.10             | 497.23              |
| A_68_P22186536 | chr3:62143169-62143213                            | NM_001081295:492   | Arhgef26   | INSIDE                 | 0.354                                           | 0.261                            | 2043.42             | 533.31              | 0.092                            | 1705.32             | 157.56              |
| A_68_P29486554 | chr14:28149566-28149610                           | NM_027871:98364    | Arhgef3    | INSIDE                 | 0.344                                           | 0.625                            | 1140.57             | 712.63              | 0.215                            | 936.30              | 201.24              |
| A_68_P31758245 | chr18:61696023-61696067                           | NM_177828:146      | Arhgef37   | INSIDE                 | 0.502                                           | 0.570                            | 3424.01             | 1951.50             | 0.286                            | 2888.38             | 826.87              |
| A_68_P29604086 | chr14:52604738-52604782                           | NM_001145921:253   | Arhgef40   | INSIDE                 | 0.402                                           | 0.420                            | 2403.91             | 1009.44             | 0.169                            | 1831.28             | 309.16              |
| A_68_P25657168 | chr8:11727352-11727396                            | NM_001113517:-730  | Arhgef7    | PROMOTER               | 0.135                                           | 1.363                            | 1967.00             | 2681.30             | 0.184                            | 1363.99             | 250.51              |
| A_68_P25657170 | chr8:11727542-11727589                            | NM_001113517:-539  | Arhgef7    | PROMOTER               | 0.147                                           | 0.519                            | 2257.04             | 1170.55             | 0.076                            | 1612.50             | 123.06              |
| A_68_P25657171 | chr8:11727694-11727738                            | NM_001113517:-388  | Arhgef7    | PROMOTER               | 0.179                                           | 0.584                            | 1503.22             | 877.26              | 0.104                            | 1135.66             | 118.52              |
| A_68_P25657379 | chr8:11758150-11758194                            | NM_001113518:-157  | Arhgef7    | PROMOTER               | 0.300                                           | 0.631                            | 5001.76             | 3157.28             | 0.189                            | 3997.93             | 757.01              |
| A_68_P23319375 | chr4:133312530-133312574                          | NM_001080819:-3026 | Arid1a     | PROMOTER               | 0.375                                           | 0.432                            | 1290.39             | 557.28              | 0.162                            | 1118.56             | 181.29              |
| A_68_P30462697 | chr15:96118805-96118849                           | NM_175251:874      | Arid2      | INSIDE                 | 0.613                                           | 2.922                            | 759.14              | 2218.15             | 1.792                            | 653.35              | 1170.67             |
| A_68_P27279758 | chr10:79389293-79389337                           | NM_007880:-502     | Arid3a     | PROMOTER               | 0.426                                           | 0.472                            | 1199.10             | 565.47              | 0.201                            | 934.58              | 187.72              |
| A_68_P26544131 | chr9:57684762-57684806                            | NM_019689:-2743    | Arid3b     | PROMOTER               | 0.307                                           | 0.536                            | 1084.24             | 580.89              | 0.164                            | 755.43              | 124.08              |
| A_68_P22864000 | chr4:41672774-41672818                            | NM_001017362:5378  | Arid3c     | INSIDE                 | 0.315                                           | 0.641                            | 798.47              | 511.82              | 0.202                            | 684.75              | 138.37              |
| A_68_P22864042 | chr4:41678377-41678421                            | NM_001017362:-224  | Arid3c     | PROMOTER               | 0.421                                           | 1.491                            | 3127.52             | 4663.60             | 0.627                            | 2219.77             | 1392.00             |

| ProbeName      | Target position of probe on CpG island microarray | TargetID           | GeneSymbol | CpG island Description | Ratio of relative methylation (TiO2-NP/Vehicle) | Sham group                       |                     |                     | TiO <sub>2</sub> -H group        |                     |                     |
|----------------|---------------------------------------------------|--------------------|------------|------------------------|-------------------------------------------------|----------------------------------|---------------------|---------------------|----------------------------------|---------------------|---------------------|
|                |                                                   |                    |            |                        |                                                 | Relative methylation (Cy-5/Cy-3) | Cy-3 signal (Input) | Cy-5 signal (MeDIP) | Relative methylation (Cy-5/Cy-3) | Cy-3 signal (Input) | Cy-5 signal (MeDIP) |
| A_68_P22864043 | chr4:41678560-41678610                            | NM_001017362:-410  | Arid3c     | PROMOTER               | 0.139                                           | 2.159                            | 3516.81             | 7591.05             | 0.300                            | 2035.89             | 611.32              |
| A_68_P28523840 | chr12:72116565-72116609                           | NM_001081195:-367  | Arid4a     | PROMOTER               | 0.138                                           | 0.721                            | 2671.37             | 1926.18             | 0.100                            | 2074.18             | 206.87              |
| A_68_P28524149 | chr12:72170902-72170957                           | NM_001081195:53976 | Arid4a     | INSIDE                 | 0.637                                           | 3.138                            | 1242.63             | 3899.38             | 1.997                            | 930.82              | 1859.19             |
| A_68_P28836955 | chr13:14156050-14156094                           | NM_194262:14       | Arid4b     | INSIDE                 | 0.228                                           | 0.499                            | 1692.12             | 844.59              | 0.114                            | 1468.23             | 166.81              |
| A_68_P28836956 | chr13:14156155-14156199                           | NM_194262:118      | Arid4b     | INSIDE                 | 0.669                                           | 0.690                            | 1919.69             | 1325.30             | 0.462                            | 1563.90             | 722.57              |
| A_68_P20147467 | chr1:36364433-36364477                            | NM_001172205:-123  | Arid5a     | PROMOTER               | 0.364                                           | 0.592                            | 997.95              | 590.96              | 0.215                            | 902.68              | 194.44              |
| A_68_P20147469 | chr1:36364742-36364786                            | NM_001172205:187   | Arid5a     | INSIDE                 | 0.179                                           | 0.533                            | 1711.95             | 913.27              | 0.095                            | 1292.59             | 123.34              |
| A_68_P20147470 | chr1:36364812-36364860                            | NM_001172205:259   | Arid5a     | INSIDE                 | 0.178                                           | 0.711                            | 1746.68             | 1241.52             | 0.127                            | 1260.98             | 159.54              |
| A_68_P29050148 | chr13:54676323-54676367                           | NM_019968:-29      | Arl10      | DIVERGENT_PROMOTER     | 0.219                                           | 0.331                            | 2013.17             | 665.54              | 0.072                            | 1613.11             | 116.60              |
| A_68_P29050149 | chr13:54676413-54676457                           | NM_019968:61       | Arl10      | INSIDE                 | 0.634                                           | 0.544                            | 2082.33             | 1132.56             | 0.345                            | 1714.75             | 591.28              |
| A_68_P30811312 | chr16:62846773-62846817                           | NM_026577:72       | Arl13b     | INSIDE                 | 0.550                                           | 0.665                            | 2678.06             | 1782.18             | 0.366                            | 2119.09             | 775.27              |
| A_68_P30811313 | chr16:62846874-62846918                           | NM_026577:-30      | Arl13b     | DIVERGENT_PROMOTER     | 0.352                                           | 0.563                            | 1751.08             | 985.69              | 0.198                            | 1531.81             | 303.94              |
| A_68_P29342438 | chr13:114584476-114584520                         | NM_172595:-217     | Arl15      | PROMOTER               | 0.541                                           | 0.581                            | 1224.91             | 711.98              | 0.315                            | 961.95              | 302.75              |
| A_68_P29342440 | chr13:114584633-114584677                         | NM_172595:-61      | Arl15      | PROMOTER               | 0.240                                           | 0.709                            | 2740.09             | 1942.55             | 0.170                            | 1994.72             | 339.44              |
| A_68_P28184735 | chr11:120328666-120328710                         | NM_197995:226      | Arl16      | INSIDE                 | 0.599                                           | 0.697                            | 1341.45             | 935.31              | 0.418                            | 1020.53             | 426.48              |
| A_68_P26078867 | chr8:97190919-97190966                            | NM_024269:-63      | Arl2bp     | PROMOTER               | 0.215                                           | 0.562                            | 2225.49             | 1250.55             | 0.121                            | 1533.88             | 185.36              |
| A_68_P28075090 | chr11:101526871-101526915                         | NM_025404:38       | Arl4d      | INSIDE                 | 0.194                                           | 0.626                            | 2054.59             | 1287.08             | 0.121                            | 1449.01             | 175.80              |
| A_68_P21219427 | chr2:52279977-52280021                            | NM_182994:396      | Arl5a      | INSIDE                 | 0.192                                           | 0.580                            | 1441.71             | 836.71              | 0.111                            | 1059.03             | 118.00              |
| A_68_P24059367 | chr5:124566387-124566431                          | NM_144509:292      | Arl6ip4    | INSIDE                 | 0.344                                           | 0.407                            | 1975.84             | 804.76              | 0.140                            | 1547.73             | 217.04              |
| A_68_P21224226 | chr2:53051139-53051183                            | NM_022989:43       | Arl6ip6    | INSIDE                 | 0.534                                           | 0.426                            | 1242.49             | 529.75              | 0.228                            | 1089.20             | 248.21              |
| A_68_P20637766 | chr1:137043169-137043217                          | NM_026823:-218     | Arl8a      | PROMOTER               | 0.643                                           | 0.668                            | 1332.89             | 889.74              | 0.429                            | 1043.44             | 447.63              |
| A_68_P24735710 | chr6:108733170-108733214                          | NM_026011:140      | Arl8b      | INSIDE                 | 0.646                                           | 0.535                            | 1523.38             | 815.54              | 0.346                            | 1278.76             | 442.11              |
| A_68_P25509652 | chr7:135381090-135381137                          | NM_146205:243      | Armc5      | INSIDE                 | 0.206                                           | 0.625                            | 1325.94             | 828.76              | 0.129                            | 959.78              | 123.47              |
| A_68_P26764913 | chr9:99469012-99469056                            | NM_028768:284      | Armc8      | INSIDE                 | 0.235                                           | 0.503                            | 1708.02             | 858.31              | 0.118                            | 1403.53             | 165.42              |
| A_68_P26764915 | chr9:99469261-99469305                            | NM_028768:36       | Armc8      | INSIDE                 | 0.591                                           | 0.507                            | 1275.98             | 647.07              | 0.300                            | 944.09              | 283.19              |
| A_68_P32673102 | chrX:131220969-131221013                          | NM_001202500:-6872 | Armcx4     | PROMOTER               | 0.157                                           | 1.696                            | 2755.68             | 4674.73             | 0.267                            | 1102.55             | 294.43              |
| A_68_P25288544 | chr7:91558102-91558146                            | NM_007488:345      | Arnt2      | INSIDE                 | 0.228                                           | 0.557                            | 1228.88             | 683.88              | 0.127                            | 943.46              | 119.77              |
| A_68_P25429183 | chr7:120351014-120351062                          | NM_007489:60       | Arntl      | INSIDE                 | 0.120                                           | 0.613                            | 2021.53             | 1239.23             | 0.073                            | 1635.69             | 120.17              |
| A_68_P25429189 | chr7:120351704-120351748                          | NM_007489:748      | Arntl      | INSIDE                 | 0.292                                           | 0.529                            | 1000.70             | 529.57              | 0.155                            | 829.35              | 128.15              |
| A_68_P25429192 | chr7:120352049-120352095                          | NM_007489:1094     | Arntl      | INSIDE                 | 0.316                                           | 0.677                            | 1310.12             | 886.85              | 0.214                            | 1060.90             | 226.75              |
| A_68_P24050077 | chr5:122841748-122841803                          | NM_019824:-161     | Arpc3      | PROMOTER               | 0.266                                           | 0.480                            | 1637.78             | 786.52              | 0.128                            | 1173.02             | 150.12              |
| A_68_P24050080 | chr5:122842069-122842113                          | NM_019824:154      | Arpc3      | INSIDE                 | 0.400                                           | 0.718                            | 4394.64             | 3154.81             | 0.287                            | 3316.23             | 952.58              |
| A_68_P24759116 | chr6:113328203-113328247                          | NM_001170485:118   | Arpc4      | INSIDE                 | 0.596                                           | 0.626                            | 924.00              | 578.23              | 0.373                            | 765.03              | 285.30              |
| A_68_P21151655 | chr2:38863832-38863876                            | NM_028809:196      | Arpc5l     | INSIDE                 | 0.390                                           | 0.589                            | 4486.65             | 2640.44             | 0.230                            | 3453.30             | 793.23              |
| A_68_P22029171 | chr3:30494182-30494226                            | NM_029690:4588     | Arppm1     | DOWNSTREAM             | 0.438                                           | 0.628                            | 1590.38             | 999.46              | 0.275                            | 1188.76             | 327.46              |
| A_68_P26834222 | chr9:112137879-112137923                          | NM_001177619:-555  | Arpp21     | PROMOTER               | 0.487                                           | 0.497                            | 1421.06             | 705.74              | 0.242                            | 1267.75             | 306.45              |
| A_68_P27900650 | chr11:70245838-70245882                           | NM_145429:-294     | Arrb2      | PROMOTER               | 0.265                                           | 0.590                            | 1112.28             | 656.73              | 0.156                            | 1005.28             | 157.11              |
| A_68_P27900654 | chr11:70246223-70246267                           | NM_145429:90       | Arrb2      | INSIDE                 | 0.260                                           | 0.482                            | 1798.49             | 867.27              | 0.125                            | 1423.92             | 178.46              |
| A_68_P25954402 | chr8:73362864-73362908                            | NM_027560:733      | Arrdc2     | INSIDE                 | 0.353                                           | 0.510                            | 1134.57             | 578.25              | 0.180                            | 861.51              | 155.06              |
| A_68_P25954403 | chr8:73362971-73363015                            | NM_027560:627      | Arrdc2     | INSIDE                 | 0.518                                           | 0.524                            | 1499.61             | 785.72              | 0.272                            | 1276.75             | 346.77              |
| A_68_P25954407 | chr8:73363491-73363535                            | NM_027560:107      | Arrdc2     | INSIDE                 | 0.431                                           | 0.629                            | 4802.10             | 3020.09             | 0.271                            | 3083.84             | 836.07              |
| A_68_P25954408 | chr8:73363586-73363630                            | NM_027560:11       | Arrdc2     | INSIDE                 | 0.456                                           | 0.684                            | 1297.47             | 887.59              | 0.312                            | 956.10              | 298.18              |
| A_68_P23893979 | chr5:92821310-92821354                            | NM_181728:60466    | Art3       | INSIDE                 | 0.602                                           | 2.868                            | 1474.08             | 4228.29             | 1.727                            | 1177.63             | 2033.79             |
| A_68_P23237356 | chr4:117599653-117599697                          | NM_009711:2694     | Artn       | INSIDE                 | 0.120                                           | 0.681                            | 2787.19             | 1896.90             | 0.082                            | 2092.35             | 171.28              |

| ProbeName      | Target position of probe on CpG island microarray | TargetID           | GeneSymbol | CpG island Description | Ratio of relative methylation (TiO2-NP/Vehicle) | Sham group                       |                     |                     | TiO <sub>2</sub> -H group        |                     |                     |
|----------------|---------------------------------------------------|--------------------|------------|------------------------|-------------------------------------------------|----------------------------------|---------------------|---------------------|----------------------------------|---------------------|---------------------|
|                |                                                   |                    |            |                        |                                                 | Relative methylation (Cy-5/Cy-3) | Cy-3 signal (Input) | Cy-5 signal (MeDIP) | Relative methylation (Cy-5/Cy-3) | Cy-3 signal (Input) | Cy-5 signal (MeDIP) |
| A_68_P23237358 | chr4:117599846-117599890                          | NM_009711:2500     | Artn       | INSIDE                 | 0.359                                           | 0.564                            | 1056.45             | 596.23              | 0.202                            | 882.24              | 178.51              |
| A_68_P23237382 | chr4:117602465-117602509                          | NM_009711:-118     | Artn       | PROMOTER               | 0.581                                           | 0.578                            | 927.52              | 535.73              | 0.336                            | 760.39              | 255.25              |
| A_68_P30579427 | chr16:18392999-18393043                           | NM_033474:44654    | Arvcf      | INSIDE                 | 0.588                                           | 0.577                            | 1495.70             | 862.72              | 0.339                            | 1055.92             | 357.93              |
| A_68_P25810705 | chr8:42459691-42459735                            | NM_019734:339      | Asah1      | INSIDE                 | 0.139                                           | 0.561                            | 2521.91             | 1414.34             | 0.078                            | 2001.07             | 155.57              |
| A_68_P25810709 | chr8:42460188-42460232                            | NM_019734:-159     | Asah1      | PROMOTER               | 0.221                                           | 0.564                            | 2228.79             | 1257.40             | 0.124                            | 1636.78             | 203.73              |
| A_68_P30281417 | chr15:64214477-64214523                           | NM_010026:-19      | Asap1      | PROMOTER               | 0.263                                           | 0.537                            | 1075.83             | 577.34              | 0.141                            | 854.13              | 120.74              |
| A_68_P33008888 | chr12:21117412-21117456                           | NM_001004364:-182  | Asap2      | PROMOTER               | 0.495                                           | 0.624                            | 2182.03             | 1360.53             | 0.309                            | 1852.20             | 572.08              |
| A_68_P23332631 | chr4:135762030-135762074                          | NM_001008232:-227  | Asap3      | PROMOTER               | 0.350                                           | 1.625                            | 4946.21             | 8037.03             | 0.568                            | 3366.45             | 1912.69             |
| A_68_P23332632 | chr4:135762182-135762226                          | NM_001008232:-75   | Asap3      | PROMOTER               | 0.543                                           | 2.821                            | 18055.88            | 50943.65            | 1.533                            | 12634.63            | 19363.60            |
| A_68_P23332634 | chr4:135762412-135762456                          | NM_001008232:155   | Asap3      | INSIDE                 | 0.445                                           | 1.456                            | 5422.86             | 7897.83             | 0.649                            | 3741.92             | 2426.99             |
| A_68_P23332636 | chr4:135762606-135762650                          | NM_001008232:349   | Asap3      | INSIDE                 | 0.378                                           | 0.542                            | 1377.48             | 746.30              | 0.205                            | 1042.38             | 213.43              |
| A_68_P20443149 | chr1:93437651-93437695                            | NM_023046:16       | Asb1       | INSIDE                 | 0.341                                           | 0.604                            | 982.35              | 593.63              | 0.206                            | 826.95              | 170.48              |
| A_68_P27129524 | chr10:50312341-50312389                           | NM_001146089:-110  | Ascc3      | PROMOTER               | 0.245                                           | 0.369                            | 1787.00             | 659.68              | 0.091                            | 1316.22             | 119.18              |
| A_68_P27129528 | chr10:50312762-50312806                           | NM_001146089:310   | Ascc3      | INSIDE                 | 0.402                                           | 0.639                            | 3730.88             | 2382.81             | 0.257                            | 3140.60             | 806.64              |
| A_68_P27320001 | chr10:86955807-86955851                           | NM_008553:577      | Ascl1      | INSIDE                 | 0.604                                           | 0.595                            | 2074.22             | 1235.00             | 0.359                            | 1735.27             | 623.81              |
| A_68_P25597927 | chr7:150153952-150153996                          | NM_008554:1195     | Ascl2      | INSIDE                 | 0.601                                           | 0.661                            | 3359.94             | 2222.43             | 0.397                            | 2505.57             | 995.60              |
| A_68_P27143033 | chr10:53316773-53316825                           | NM_025541:32       | Asfla      | INSIDE                 | 0.325                                           | 0.576                            | 1402.87             | 808.05              | 0.187                            | 1079.97             | 202.03              |
| A_68_P26017291 | chr8:86479163-86479209                            | NM_024184:-406     | Asflb      | PROMOTER               | 0.463                                           | 0.562                            | 1330.21             | 747.39              | 0.260                            | 1026.62             | 267.35              |
| A_68_P24222134 | chr6:7643189-7643233                              | NM_012055:-28      | Asns       | PROMOTER               | 0.396                                           | 0.542                            | 2387.82             | 1293.90             | 0.215                            | 2052.41             | 440.34              |
| A_68_P26797104 | chr9:105297728-105297772                          | NM_001164828:-5367 | Aste1      | PROMOTER               | 0.326                                           | 0.267                            | 2822.70             | 753.01              | 0.087                            | 2039.80             | 177.66              |
| A_68_P22987051 | chr4:66064069-66064114                            | NM_019514:1426     | Astn2      | INSIDE                 | 0.334                                           | 0.582                            | 1421.91             | 827.13              | 0.194                            | 1118.36             | 217.36              |
| A_68_P21754296 | chr2:153171121-153171165                          | NM_001039939:-732  | Asx11      | PROMOTER               | 0.280                                           | 0.543                            | 1780.67             | 966.24              | 0.152                            | 1397.73             | 212.40              |
| A_68_P21754298 | chr2:153171422-153171466                          | NM_001039939:430   | Asx11      | PROMOTER               | 0.279                                           | 0.595                            | 1114.15             | 663.06              | 0.166                            | 835.84              | 138.76              |
| A_68_P28195046 | chr12:3427021-3427065                             | NM_172421:159      | Asx12      | INSIDE                 | 0.273                                           | 0.518                            | 1125.85             | 583.05              | 0.141                            | 956.58              | 135.04              |
| A_68_P28195050 | chr12:3427455-3427499                             | NM_172421:593      | Asx12      | INSIDE                 | 0.432                                           | 0.652                            | 2722.75             | 1775.44             | 0.282                            | 1964.95             | 554.15              |
| A_68_P28195051 | chr12:3427564-3427608                             | NM_172421:703      | Asx12      | INSIDE                 | 0.528                                           | 0.694                            | 1675.94             | 1162.81             | 0.367                            | 1311.65             | 480.87              |
| A_68_P31549440 | chr18:22503476-22503523                           | NM_001167777:-90   | Asx13      | PROMOTER               | 0.227                                           | 1.545                            | 1348.28             | 2083.47             | 0.350                            | 980.71              | 343.59              |
| A_68_P30246252 | chr15:57966703-57966747                           | NM_027435:-87      | Atad2      | DIVERGENT_PROMOTER     | 0.273                                           | 0.396                            | 1933.52             | 766.20              | 0.108                            | 1613.12             | 174.67              |
| A_68_P25522113 | chr7:137663240-137663284                          | NM_013799:-209     | Ate1       | PROMOTER               | 0.373                                           | 0.399                            | 1322.65             | 527.16              | 0.149                            | 1146.31             | 170.55              |
| A_68_P25522114 | chr7:137663333-137663377                          | NM_013799:-301     | Ate1       | PROMOTER               | 0.357                                           | 0.465                            | 1593.89             | 741.10              | 0.166                            | 1271.71             | 211.32              |
| A_68_P25522115 | chr7:137663415-137663459                          | NM_013799:-383     | Ate1       | PROMOTER               | 0.373                                           | 0.500                            | 2341.57             | 1170.99             | 0.186                            | 1742.52             | 324.88              |
| A_68_P21334155 | chr2:73729976-73730020                            | NM_001025093:687   | Att2       | INSIDE                 | 0.149                                           | 1.442                            | 3688.30             | 5319.20             | 0.216                            | 2553.75             | 550.51              |
| A_68_P21334161 | chr2:73730794-73730838                            | NM_001025093:-131  | Att2       | PROMOTER               | 0.621                                           | 0.592                            | 1565.67             | 927.41              | 0.368                            | 1036.41             | 381.19              |
| A_68_P21334162 | chr2:73730864-73730908                            | NM_001025093:-201  | Att2       | PROMOTER               | 0.329                                           | 0.595                            | 1886.52             | 1122.96             | 0.196                            | 1416.68             | 277.07              |
| A_68_P21334163 | chr2:73730945-73730989                            | NM_001025093:-281  | Att2       | PROMOTER               | 0.288                                           | 0.498                            | 1166.27             | 581.04              | 0.143                            | 875.44              | 125.49              |
| A_68_P20936657 | chr1:193006272-193006316                          | NM_007498:918      | Att3       | INSIDE                 | 0.290                                           | 0.486                            | 1095.96             | 532.55              | 0.141                            | 829.74              | 116.77              |
| A_68_P20936658 | chr1:193006394-193006440                          | NM_007498:796      | Att3       | INSIDE                 | 0.262                                           | 0.363                            | 1570.51             | 570.60              | 0.095                            | 1266.87             | 120.50              |
| A_68_P20936667 | chr1:193007287-193007331                          | NM_007498:-96      | Att3       | PROMOTER               | 0.325                                           | 0.558                            | 3284.36             | 1832.38             | 0.182                            | 2456.72             | 446.10              |
| A_68_P20936670 | chr1:193007730-193007774                          | NM_007498:-540     | Att3       | PROMOTER               | 0.121                                           | 0.524                            | 2412.38             | 1263.17             | 0.064                            | 1813.19             | 115.16              |
| A_68_P30371083 | chr15:80085473-80085517                           | NM_009716:-119     | Att4       | PROMOTER               | 0.543                                           | 0.632                            | 913.43              | 577.46              | 0.343                            | 744.56              | 255.46              |
| A_68_P30371086 | chr15:80085860-80085904                           | NM_009716:269      | Att4       | INSIDE                 | 0.143                                           | 0.739                            | 6418.96             | 4741.92             | 0.106                            | 4567.50             | 482.91              |
| A_68_P30371088 | chr15:80086012-80086056                           | NM_009716:421      | Att4       | INSIDE                 | 0.232                                           | 0.672                            | 1019.51             | 685.55              | 0.156                            | 773.57              | 120.87              |
| A_68_P30498878 | chr15:102455997-102456041                         | NM_146065:-166     | Att7       | PROMOTER               | 0.282                                           | 0.534                            | 1176.12             | 627.93              | 0.151                            | 1056.04             | 159.25              |
| A_68_P30498879 | chr15:102456094-102456138                         | NM_146065:-264     | Att7       | PROMOTER               | 0.209                                           | 0.676                            | 1260.49             | 851.60              | 0.141                            | 942.59              | 133.37              |



| ProbeName      | Target position of probe on CpG island microarray | TargetID         | GeneSymbol | CpG island Description | Ratio of relative methylation (TiO2-NP/Vehicle) | Sham group                       |                     |                     | TiO <sub>2</sub> -H group        |                     |                     |
|----------------|---------------------------------------------------|------------------|------------|------------------------|-------------------------------------------------|----------------------------------|---------------------|---------------------|----------------------------------|---------------------|---------------------|
|                |                                                   |                  |            |                        |                                                 | Relative methylation (Cy-5/Cy-3) | Cy-3 signal (Input) | Cy-5 signal (MeDIP) | Relative methylation (Cy-5/Cy-3) | Cy-3 signal (Input) | Cy-5 signal (MeDIP) |
| A_68_P30541084 | chr16:10193396-10193440                           | NM_029253:420    | Atf7ip2    | INSIDE                 | 0.398                                           | 0.608                            | 995.72              | 605.68              | 0.242                            | 813.64              | 197.17              |
| A_68_P21424191 | chr2:91550574-91550618                            | NM_145528:137    | Atg13      | INSIDE                 | 0.178                                           | 0.473                            | 1858.80             | 878.54              | 0.084                            | 1387.62             | 116.93              |
| A_68_P31933382 | chr19:6241388-6241441                             | NM_194348:-253   | Atg2a      | DIVERGENT_PROMOTER     | 0.522                                           | 0.641                            | 1685.53             | 1081.01             | 0.335                            | 1362.54             | 456.31              |
| A_68_P28710685 | chr12:106923369-106923413                         | NM_029654:61     | Atg2b      | INSIDE                 | 0.464                                           | 0.489                            | 1650.17             | 807.24              | 0.227                            | 1234.84             | 280.45              |
| A_68_P30725228 | chr16:45159441-45159485                           | NM_026402:521    | Atg3       | INSIDE                 | 0.516                                           | 0.405                            | 1313.07             | 532.40              | 0.209                            | 1403.01             | 293.47              |
| A_68_P27104595 | chr10:43988364-43988408                           | NM_053069:223    | Atg5       | INSIDE                 | 0.393                                           | 0.648                            | 1331.05             | 862.37              | 0.255                            | 1161.90             | 295.86              |
| A_68_P24766251 | chr6:114593227-114593277                          | NM_028835:110    | Atg7       | INSIDE                 | 0.190                                           | 0.532                            | 1515.19             | 805.42              | 0.101                            | 1194.24             | 120.70              |
| A_68_P24766252 | chr6:114593333-114593377                          | NM_028835:212    | Atg7       | INSIDE                 | 0.361                                           | 0.552                            | 1095.39             | 605.07              | 0.200                            | 843.59              | 168.36              |
| A_68_P20331601 | chr1:71603829-71603873                            | NM_026195:121    | Atic       | INSIDE                 | 0.492                                           | 0.572                            | 1087.42             | 622.15              | 0.282                            | 942.67              | 265.52              |
| A_68_P31380046 | chr17:80294471-80294516                           | NM_019717:875    | Atl2       | INSIDE                 | 0.256                                           | 0.423                            | 1900.27             | 804.48              | 0.108                            | 1656.10             | 179.57              |
| A_68_P31380056 | chr17:80295692-80295741                           | NM_178050:-253   | Atl2       | PROMOTER               | 0.249                                           | 0.670                            | 1582.53             | 1060.85             | 0.167                            | 1146.29             | 190.96              |
| A_68_P26521201 | chr9:53344702-53344746                            | NM_007499:52     | Atm        | INSIDE                 | 0.371                                           | 0.563                            | 1806.66             | 1017.29             | 0.209                            | 1388.30             | 289.78              |
| A_68_P26521203 | chr9:53344856-53344900                            | NM_007499:-102   | Atm        | DIVERGENT_PROMOTER     | 0.523                                           | 0.480                            | 1954.94             | 938.10              | 0.251                            | 1532.71             | 384.40              |
| A_68_P26199828 | chr8:119467966-119468010                          | NM_177700:696    | Atmin      | INSIDE                 | 0.286                                           | 0.586                            | 1366.95             | 801.42              | 0.168                            | 1053.01             | 176.42              |
| A_68_P24816772 | chr6:124696114-124696158                          | NM_007881:10369  | Atn1       | INSIDE                 | 0.416                                           | 0.313                            | 1682.71             | 526.81              | 0.130                            | 1384.15             | 180.22              |
| A_68_P24540589 | chr6:72184688-72184732                            | NM_153778:861    | Atoh8      | INSIDE                 | 0.344                                           | 0.409                            | 3018.72             | 1233.51             | 0.140                            | 2370.38             | 333.00              |
| A_68_P24540591 | chr6:72184914-72184958                            | NM_153778:635    | Atoh8      | INSIDE                 | 0.657                                           | 0.687                            | 2346.58             | 1611.95             | 0.451                            | 1756.77             | 792.80              |
| A_68_P27815711 | chr11:55274535-55274579                           | NM_009720:84     | Atox1      | INSIDE                 | 0.573                                           | 0.421                            | 1520.34             | 640.64              | 0.241                            | 1224.27             | 295.63              |
| A_68_P22055030 | chr3:35653187-35653231                            | NM_029570:149    | Atp11b     | INSIDE                 | 0.335                                           | 0.485                            | 2517.63             | 1220.74             | 0.163                            | 1939.55             | 315.50              |
| A_68_P30641650 | chr16:30388204-30388248                           | NM_001128094:390 | Atp13a3    | INSIDE                 | 0.453                                           | 0.669                            | 2570.18             | 1719.18             | 0.303                            | 1876.88             | 568.63              |
| A_68_P30641651 | chr16:30388272-30388316                           | NM_001128094:322 | Atp13a3    | INSIDE                 | 0.161                                           | 0.634                            | 1567.10             | 994.05              | 0.102                            | 1204.28             | 122.65              |
| A_68_P22376200 | chr3:101408960-101409004                          | NM_144900:-402   | Atp1a1     | PROMOTER               | 0.131                                           | 0.564                            | 2175.68             | 1226.08             | 0.074                            | 1686.48             | 124.14              |
| A_68_P25007799 | chr7:25790496-25790540                            | NM_144921:396    | Atp1a3     | INSIDE                 | 0.249                                           | 0.699                            | 4545.61             | 3177.14             | 0.174                            | 3043.34             | 530.46              |
| A_68_P25007800 | chr7:25790566-25790610                            | NM_144921:326    | Atp1a3     | INSIDE                 | 0.209                                           | 0.658                            | 5992.61             | 3945.69             | 0.138                            | 4462.89             | 613.87              |
| A_68_P25007802 | chr7:25790777-25790821                            | NM_144921:116    | Atp1a3     | INSIDE                 | 0.325                                           | 0.643                            | 1282.34             | 824.20              | 0.209                            | 1114.82             | 232.54              |
| A_68_P27896074 | chr11:69419192-69419236                           | NM_013415:248    | Atp1b2     | INSIDE                 | 0.233                                           | 0.617                            | 1655.94             | 1021.30             | 0.144                            | 1303.26             | 187.19              |
| A_68_P24050685 | chr5:122952811-122952855                          | NM_009722:-598   | Atp2a2     | PROMOTER               | 0.354                                           | 0.571                            | 2296.54             | 1311.45             | 0.202                            | 1599.57             | 323.01              |
| A_68_P27383830 | chr10:98378401-98378445                           | NM_026482:637    | Atp2b1     | INSIDE                 | 0.349                                           | 0.489                            | 1129.78             | 552.80              | 0.171                            | 981.17              | 167.42              |
| A_68_P27383831 | chr10:98378471-98378515                           | NM_026482:707    | Atp2b1     | INSIDE                 | 0.198                                           | 0.586                            | 1396.74             | 818.14              | 0.116                            | 1044.50             | 121.02              |
| A_68_P24763305 | chr6:113991563-113991607                          | NM_009723:490    | Atp2b2     | INSIDE                 | 0.178                                           | 2.059                            | 2370.00             | 4879.63             | 0.366                            | 1373.47             | 502.65              |
| A_68_P26797752 | chr9:105396915-105396959                          | NM_175025:511    | Atp2c1     | INSIDE                 | 0.268                                           | 0.689                            | 1785.32             | 1230.42             | 0.184                            | 1314.36             | 242.36              |
| A_68_P26797759 | chr9:105397652-105397696                          | NM_175025:-227   | Atp2c1     | PROMOTER               | 0.302                                           | 0.667                            | 2789.01             | 1860.65             | 0.202                            | 2145.78             | 432.40              |
| A_68_P31849681 | chr18:78012952-78012997                           | NM_007505:468    | Atp5a1     | INSIDE                 | 0.631                                           | 0.550                            | 2082.15             | 1144.89             | 0.347                            | 1835.81             | 636.47              |
| A_68_P31849682 | chr18:78013054-78013098                           | NM_007505:570    | Atp5a1     | INSIDE                 | 0.530                                           | 0.666                            | 6049.71             | 4029.27             | 0.353                            | 4937.87             | 1742.18             |
| A_68_P27281231 | chr10:79604257-79604301                           | NM_025313:-781   | Atp5d      | DIVERGENT_PROMOTER     | 0.212                                           | 0.398                            | 2124.86             | 845.47              | 0.084                            | 1462.53             | 123.55              |
| A_68_P30499085 | chr15:102501421-102501465                         | NM_026468:36     | Atp5g2     | INSIDE                 | 0.360                                           | 0.503                            | 1158.87             | 583.29              | 0.181                            | 975.92              | 176.77              |
| A_68_P28153350 | chr11:115274720-115274764                         | NM_027862:6491   | Atp5h      | DOWNSTREAM             | 0.626                                           | 0.324                            | 1681.50             | 544.65              | 0.203                            | 1313.19             | 266.33              |
| A_68_P23971890 | chr5:108863226-108863271                          | NM_007507:149    | Atp5k      | INSIDE                 | 0.332                                           | 1.509                            | 3721.60             | 5614.14             | 0.501                            | 2764.16             | 1385.19             |
| A_68_P23971891 | chr5:108863299-108863343                          | NM_007507:77     | Atp5k      | INSIDE                 | 0.257                                           | 0.700                            | 3174.55             | 2223.18             | 0.180                            | 2375.54             | 427.66              |
| A_68_P23971892 | chr5:108863393-108863437                          | NM_007507:-17    | Atp5k      | PROMOTER               | 0.219                                           | 0.542                            | 1340.39             | 726.27              | 0.119                            | 982.53              | 116.49              |
| A_68_P32262593 | chrX:12164837-12164881                            | NM_027439:-26    | Atp6ap2    | PROMOTER               | 0.212                                           | 1.548                            | 1788.61             | 2768.02             | 0.328                            | 654.60              | 214.96              |
| A_68_P32262594 | chrX:12164926-12164970                            | NM_027439:64     | Atp6ap2    | INSIDE                 | 0.083                                           | 1.768                            | 3157.66             | 5582.75             | 0.147                            | 1146.07             | 168.05              |
| A_68_P23237065 | chr4:117559612-117559656                          | NM_033617:300    | Atp6v0b    | INSIDE                 | 0.213                                           | 0.361                            | 1985.78             | 716.44              | 0.077                            | 1563.17             | 120.25              |
| A_68_P23237067 | chr4:117559785-117559829                          | NM_033617:128    | Atp6v0b    | INSIDE                 | 0.073                                           | 0.749                            | 4477.31             | 3352.79             | 0.055                            | 2996.22             | 163.37              |

| ProbeName      | Target position of probe on CpG island microarray | TargetID          | GeneSymbol  | CpG island Description | Ratio of relative methylation (TiO2-NP/Vehicle) | Sham group                       |                     |                     | TiO <sub>2</sub> -H group        |                     |                     |
|----------------|---------------------------------------------------|-------------------|-------------|------------------------|-------------------------------------------------|----------------------------------|---------------------|---------------------|----------------------------------|---------------------|---------------------|
|                |                                                   |                   |             |                        |                                                 | Relative methylation (Cy-5/Cy-3) | Cy-3 signal (Input) | Cy-5 signal (MeDIP) | Relative methylation (Cy-5/Cy-3) | Cy-3 signal (Input) | Cy-5 signal (MeDIP) |
| A_68_P23237068 | chr4:117559980-117560024                          | NM_033617:-68     | Atp6v0b     | PROMOTER               | 0.561                                           | 0.520                            | 3287.93             | 1710.73             | 0.292                            | 2579.57             | 752.50              |
| A_68_P31095793 | chr17:24306024-24306068                           | NR_037854:294     | Atp6v0c-ps2 | INSIDE                 | 0.204                                           | 1.458                            | 5335.23             | 7779.95             | 0.298                            | 3518.06             | 1048.64             |
| A_68_P31095796 | chr17:24306345-24306389                           | NR_037854:-26     | Atp6v0c-ps2 | PROMOTER               | 0.426                                           | 0.579                            | 2335.57             | 1352.31             | 0.247                            | 1816.59             | 447.87              |
| A_68_P26134606 | chr8:108089561-108089605                          | NM_013477:358     | Atp6v0d1    | INSIDE                 | 0.649                                           | 0.568                            | 2506.60             | 1424.01             | 0.369                            | 1834.28             | 676.18              |
| A_68_P26134610 | chr8:108089960-108090004                          | NM_013477:-42     | Atp6v0d1    | PROMOTER               | 0.190                                           | 0.562                            | 1340.84             | 752.90              | 0.107                            | 1105.59             | 117.94              |
| A_68_P26134614 | chr8:108090464-108090513                          | NM_013477:-548    | Atp6v0d1    | PROMOTER               | 0.056                                           | 1.824                            | 1603.00             | 2924.67             | 0.103                            | 1152.37             | 118.29              |
| A_68_P31111771 | chr17:26813342-26813386                           | NM_025272:24      | Atp6v0e     | INSIDE                 | 0.638                                           | 0.477                            | 1213.59             | 578.99              | 0.304                            | 925.51              | 281.80              |
| A_68_P31111772 | chr17:26813424-26813468                           | NM_025272:106     | Atp6v0e     | INSIDE                 | 0.351                                           | 0.352                            | 2011.81             | 708.90              | 0.124                            | 1616.33             | 200.07              |
| A_68_P31111775 | chr17:26813633-26813677                           | NM_025272:314     | Atp6v0e     | INSIDE                 | 0.110                                           | 0.490                            | 2647.43             | 1298.45             | 0.054                            | 2132.37             | 114.84              |
| A_68_P30150545 | chr15:38591758-38591802                           | NM_025494:122     | Atp6v1c1    | INSIDE                 | 0.620                                           | 0.584                            | 1683.06             | 983.12              | 0.362                            | 1387.33             | 502.20              |
| A_68_P30150546 | chr15:38591825-38591869                           | NM_025494:188     | Atp6v1c1    | INSIDE                 | 0.451                                           | 0.473                            | 1277.36             | 604.40              | 0.213                            | 1026.16             | 218.75              |
| A_68_P28566337 | chr12:79962384-79962437                           | NM_023721:215     | Atp6v1d     | INSIDE                 | 0.454                                           | 0.573                            | 1049.72             | 601.31              | 0.260                            | 785.99              | 204.55              |
| A_68_P24800464 | chr6:120772369-120772413                          | NM_007510:313     | Atp6v1e1    | INSIDE                 | 0.505                                           | 0.573                            | 2045.06             | 1172.60             | 0.289                            | 1552.76             | 449.45              |
| A_68_P31158465 | chr17:35373569-35373613                           | NM_023179:50      | Atp6v1g2    | INSIDE                 | 0.484                                           | 0.727                            | 2241.25             | 1630.25             | 0.352                            | 1591.45             | 560.35              |
| A_68_P31776698 | chr18:64819777-64819821                           | NM_001001488:856  | Atp8b1      | INSIDE                 | 0.627                                           | 2.636                            | 1212.06             | 3194.80             | 1.652                            | 1067.03             | 1762.54             |
| A_68_P31776699 | chr18:64819875-64819919                           | NM_001001488:758  | Atp8b1      | INSIDE                 | 0.416                                           | 0.645                            | 1010.68             | 651.63              | 0.268                            | 849.92              | 228.17              |
| A_68_P31776706 | chr18:64820510-64820554                           | NM_001001488:122  | Atp8b1      | INSIDE                 | 0.506                                           | 0.644                            | 1484.65             | 956.16              | 0.326                            | 1323.99             | 431.07              |
| A_68_P22322690 | chr3:89767430-89767474                            | NM_001081182:-22  | Atp8b2      | PROMOTER               | 0.161                                           | 0.673                            | 2283.87             | 1538.14             | 0.109                            | 1457.85             | 158.39              |
| A_68_P23312749 | chr4:132089123-132089167                          | NM_007512:430     | Atpi1f      | INSIDE                 | 0.252                                           | 0.668                            | 1867.63             | 1247.15             | 0.169                            | 1405.01             | 236.85              |
| A_68_P26818135 | chr9:108976311-108976355                          | NM_172774:306     | Atrip       | INSIDE                 | 0.237                                           | 0.444                            | 1435.34             | 637.57              | 0.105                            | 1131.70             | 119.01              |
| A_68_P26818136 | chr9:108976442-108976486                          | NM_172774:174     | Atrip       | INSIDE                 | 0.288                                           | 0.607                            | 3567.99             | 2164.71             | 0.175                            | 2549.16             | 444.92              |
| A_68_P26818137 | chr9:108976539-108976583                          | NM_172774:78      | Atrip       | INSIDE                 | 0.275                                           | 0.644                            | 4735.75             | 3049.07             | 0.177                            | 3476.43             | 615.89              |
| A_68_P26818138 | chr9:108976646-108976690                          | NM_172774:-30     | Atrip       | PROMOTER               | 0.201                                           | 0.688                            | 2069.91             | 1423.61             | 0.139                            | 1605.61             | 222.50              |
| A_68_P26818139 | chr9:108976760-108976804                          | NM_172774:-144    | Atrip       | PROMOTER               | 0.214                                           | 0.492                            | 1577.61             | 775.75              | 0.105                            | 1148.62             | 120.80              |
| A_68_P21632199 | chr2:130732765-130732810                          | NM_009730:556     | Atrn        | INSIDE                 | 0.178                                           | 0.698                            | 1194.82             | 834.42              | 0.125                            | 938.74              | 116.92              |
| A_68_P32208210 | chr19:57684728-57684772                           | NM_181415:-773    | Atrn1       | PROMOTER               | 0.225                                           | 0.598                            | 1168.08             | 698.32              | 0.135                            | 866.06              | 116.62              |
| A_68_P32582138 | chrX:103124420-103124464                          | NM_009530:269     | Atrx        | INSIDE                 | 0.146                                           | 1.403                            | 1563.93             | 2193.88             | 0.204                            | 737.55              | 150.59              |
| A_68_P29005200 | chr13:46059987-46060031                           | NM_009124:337     | Atxn1       | INSIDE                 | 0.321                                           | 0.681                            | 2019.49             | 1376.26             | 0.219                            | 1592.59             | 348.06              |
| A_68_P29005206 | chr13:46060896-46060940                           | NM_009124:-573    | Atxn1       | PROMOTER               | 0.289                                           | 0.533                            | 1901.12             | 1013.24             | 0.154                            | 1466.43             | 226.22              |
| A_68_P26158730 | chr8:112261101-112261147                          | NM_001080930:515  | Atxn1l      | INSIDE                 | 0.172                                           | 1.711                            | 788.99              | 1349.74             | 0.295                            | 543.84              | 160.18              |
| A_68_P24046036 | chr5:122161287-122161331                          | NM_009125:-309    | Atxn2       | PROMOTER               | 0.409                                           | 0.670                            | 2342.01             | 1570.29             | 0.274                            | 1840.76             | 505.08              |
| A_68_P25500900 | chr7:133645875-133645919                          | NM_183020:920     | Atxn2l      | INSIDE                 | 0.343                                           | 1.484                            | 4817.28             | 7147.49             | 0.509                            | 3484.37             | 1773.35             |
| A_68_P25500902 | chr7:133646038-133646082                          | NM_183020:756     | Atxn2l      | INSIDE                 | 0.274                                           | 0.469                            | 1481.07             | 695.32              | 0.128                            | 1165.36             | 149.66              |
| A_68_P22411287 | chr3:108013581-108013625                          | NM_175183:250     | Atxn7l2     | INSIDE                 | 0.207                                           | 0.553                            | 1489.46             | 824.29              | 0.115                            | 1006.84             | 115.32              |
| A_68_P28078752 | chr11:102158739-102158784                         | NM_001098836:-818 | Atxn7l3     | PROMOTER               | 0.309                                           | 0.699                            | 1648.75             | 1152.08             | 0.216                            | 1189.68             | 256.68              |
| A_68_P32536866 | chrX:91226350-91226409                            | NR_028320:12385   | AU015836    | DOWNSTREAM             | 0.587                                           | 3.387                            | 761.39              | 2578.65             | 1.989                            | 311.25              | 618.96              |
| A_68_P23281852 | chr4:126430875-126430919                          | NM_133886:-117    | AU040320    | PROMOTER               | 0.482                                           | 0.570                            | 2215.34             | 1261.74             | 0.275                            | 1570.02             | 431.24              |
| A_68_P23281853 | chr4:126430986-126431030                          | NM_133886:-5      | AU040320    | PROMOTER               | 0.342                                           | 0.470                            | 1829.05             | 859.01              | 0.161                            | 1333.78             | 214.08              |
| A_68_P27291405 | chr10:81590620-81590664                           | NM_001163064:-115 | AU041133    | PROMOTER               | 0.265                                           | 0.641                            | 887.31              | 568.78              | 0.170                            | 709.54              | 120.48              |
| A_68_P23440848 | chr4:155205726-155205770                          | NM_025338:-6      | Aurkaip1    | PROMOTER               | 0.248                                           | 0.382                            | 1957.60             | 747.37              | 0.095                            | 1497.45             | 141.64              |
| A_68_P23440850 | chr4:155205944-155205991                          | NM_025338:213     | Aurkaip1    | INSIDE                 | 0.190                                           | 0.514                            | 1693.57             | 870.12              | 0.097                            | 1242.51             | 121.00              |
| A_68_P27892698 | chr11:68853700-68853744                           | NM_011496:-5422   | Aurkb       | PROMOTER               | 0.441                                           | 0.655                            | 3670.83             | 2403.87             | 0.289                            | 2532.99             | 730.83              |
| A_68_P27892699 | chr11:68853816-68853860                           | NM_011496:-5306   | Aurkb       | PROMOTER               | 0.238                                           | 0.632                            | 1137.73             | 718.78              | 0.150                            | 817.33              | 122.66              |
| A_68_P27892735 | chr11:68859244-68859288                           | NM_011496:122     | Aurkb       | INSIDE                 | 0.171                                           | 0.425                            | 3872.89             | 1647.01             | 0.073                            | 2824.15             | 205.58              |

| ProbeName      | Target position of probe on CpG island microarray | TargetID          | GeneSymbol    | CpG island Description | Ratio of relative methylation (TiO2-NP/Vehicle) | Sham group                       |                     |                     | TiO <sub>2</sub> -H group        |                     |                     |
|----------------|---------------------------------------------------|-------------------|---------------|------------------------|-------------------------------------------------|----------------------------------|---------------------|---------------------|----------------------------------|---------------------|---------------------|
|                |                                                   |                   |               |                        |                                                 | Relative methylation (Cy-5/Cy-3) | Cy-3 signal (Input) | Cy-5 signal (MeDIP) | Relative methylation (Cy-5/Cy-3) | Cy-3 signal (Input) | Cy-5 signal (MeDIP) |
| A_68_P27892738 | chr11:68859556-68859600                           | NM_011496:434     | Aurkb         | INSIDE                 | 0.167                                           | 0.703                            | 1338.53             | 941.36              | 0.117                            | 999.22              | 117.24              |
| A_68_P27892739 | chr11:68859626-68859680                           | NM_011496:508     | Aurkb         | INSIDE                 | 0.131                                           | 0.673                            | 1749.18             | 1176.88             | 0.088                            | 1324.96             | 116.93              |
| A_68_P24098745 | chr5:132014699-132014743                          | NM_177047:1003493 | Auts2         | INSIDE                 | 0.640                                           | 0.421                            | 1656.56             | 697.87              | 0.270                            | 1591.66             | 429.26              |
| A_68_P24104837 | chr5:133017392-133017444                          | NM_177047:795     | Auts2         | INSIDE                 | 0.098                                           | 1.484                            | 1154.17             | 1712.27             | 0.145                            | 835.43              | 121.01              |
| A_68_P24104838 | chr5:133017511-133017555                          | NM_177047:681     | Auts2         | INSIDE                 | 0.466                                           | 0.677                            | 1020.42             | 690.35              | 0.315                            | 838.88              | 264.39              |
| A_68_P24104846 | chr5:133018497-133018541                          | NM_177047:-305    | Auts2         | PROMOTER               | 0.353                                           | 0.448                            | 2293.45             | 1028.53             | 0.158                            | 1553.00             | 245.62              |
| A_68_P24104848 | chr5:133018792-133018836                          | NM_177047:-601    | Auts2         | PROMOTER               | 0.347                                           | 0.585                            | 1578.68             | 923.29              | 0.203                            | 1180.31             | 239.25              |
| A_68_P24104854 | chr5:133019778-133019822                          | NM_177047:-1587   | Auts2         | PROMOTER               | 0.377                                           | 0.685                            | 3249.49             | 2225.28             | 0.258                            | 2618.90             | 676.35              |
| A_68_P21630551 | chr2:130406332-130406390                          | NM_009732:1917    | Avp           | DOWNSTREAM             | 0.178                                           | 1.730                            | 1320.96             | 2285.70             | 0.308                            | 911.32              | 280.29              |
| A_68_P21630552 | chr2:130406411-130406455                          | NM_009732:1845    | Avp           | INSIDE                 | 0.170                                           | 0.685                            | 1598.44             | 1095.20             | 0.116                            | 1039.70             | 120.99              |
| A_68_P27508736 | chr10:121886005-121886049                         | NM_016847:472     | Avpr1a        | INSIDE                 | 0.253                                           | 0.633                            | 4461.36             | 2822.08             | 0.160                            | 3436.78             | 549.54              |
| A_68_P27508738 | chr10:121886239-121886283                         | NM_016847:706     | Avpr1a        | INSIDE                 | 0.386                                           | 0.565                            | 1135.31             | 641.21              | 0.218                            | 868.95              | 189.68              |
| A_68_P29977061 | chr15:3945633-3945677                             | NM_145930:98      | AW549877      | INSIDE                 | 0.508                                           | 0.642                            | 2560.84             | 1643.83             | 0.326                            | 2170.23             | 708.28              |
| A_68_P31108555 | chr17:26275483-26275527                           | NM_001159598:-126 | Axin1         | PROMOTER               | 0.259                                           | 0.549                            | 2182.74             | 1197.45             | 0.142                            | 1680.47             | 238.80              |
| A_68_P31108560 | chr17:26276183-26276227                           | NM_001159598:574  | Axin1         | INSIDE                 | 0.435                                           | 1.451                            | 8023.27             | 11640.05            | 0.632                            | 5667.44             | 3580.60             |
| A_68_P28115679 | chr11:108781544-108781588                         | NM_015732:-96     | Axin2         | PROMOTER               | 0.572                                           | 0.627                            | 1909.56             | 1196.62             | 0.358                            | 1757.95             | 630.21              |
| A_68_P28115682 | chr11:108781991-108782035                         | NM_015732:350     | Axin2         | INSIDE                 | 0.518                                           | 0.453                            | 2557.17             | 1159.25             | 0.235                            | 2215.46             | 520.00              |
| A_68_P28115684 | chr11:108782304-108782348                         | NM_015732:664     | Axin2         | INSIDE                 | 0.601                                           | 0.494                            | 3204.51             | 1581.72             | 0.297                            | 2628.61             | 779.86              |
| A_68_P30149944 | chr15:38448175-38448219                           | NM_001102458:825  | Azin1         | INSIDE                 | 0.547                                           | 0.721                            | 6662.80             | 4806.06             | 0.394                            | 5041.57             | 1987.79             |
| A_68_P25588372 | chr7:148547330-148547384                          | NR_033532:3653    | B230206H07Rik | INSIDE                 | 0.367                                           | 4.016                            | 965.36              | 3877.05             | 1.473                            | 734.15              | 1081.55             |
| A_68_P25588374 | chr7:148547481-148547530                          | NR_033532:3504    | B230206H07Rik | INSIDE                 | 0.129                                           | 1.759                            | 3300.83             | 5805.26             | 0.227                            | 2256.96             | 512.73              |
| A_68_P26948226 | chr10:12642736-12642780                           | NR_038027:167     | B230208H11Rik | INSIDE                 | 0.541                                           | 0.614                            | 959.35              | 589.19              | 0.332                            | 836.80              | 277.82              |
| A_68_P21073309 | chr2:25463281-25463325                            | NM_001024616:664  | B230208H17Rik | INSIDE                 | 0.556                                           | 0.422                            | 1283.25             | 541.75              | 0.235                            | 1017.19             | 238.59              |
| A_68_P21073310 | chr2:25463379-25463423                            | NM_001024616:566  | B230208H17Rik | INSIDE                 | 0.420                                           | 0.461                            | 2280.92             | 1051.03             | 0.193                            | 1867.74             | 361.13              |
| A_68_P23364698 | chr4:141102196-141102247                          | NR_030695:145     | B330016D10Rik | INSIDE                 | 0.327                                           | 0.686                            | 1102.77             | 757.05              | 0.224                            | 841.11              | 188.80              |
| A_68_P28836390 | chr13:14046166-14046215                           | NM_178640:-750    | B3galnt2      | PROMOTER               | 0.208                                           | 0.471                            | 1662.08             | 782.80              | 0.098                            | 1194.51             | 117.01              |
| A_68_P28836391 | chr13:14046280-14046324                           | NM_178640:-638    | B3galnt2      | PROMOTER               | 0.190                                           | 0.545                            | 1475.05             | 803.54              | 0.103                            | 1131.74             | 116.94              |
| A_68_P28836397 | chr13:14046979-14047023                           | NM_178640:60      | B3galnt2      | INSIDE                 | 0.243                                           | 0.301                            | 2015.66             | 606.76              | 0.073                            | 1578.47             | 115.55              |
| A_68_P28836401 | chr13:14047360-14047404                           | NM_178640:442     | B3galnt2      | INSIDE                 | 0.473                                           | 0.498                            | 1672.03             | 833.04              | 0.236                            | 1311.99             | 308.99              |
| A_68_P31151212 | chr17:34088387-34088432                           | NM_019420:24      | B3galnt4      | INSIDE                 | 0.433                                           | 0.350                            | 2374.68             | 831.92              | 0.152                            | 1767.64             | 268.00              |
| A_68_P27643056 | chr11:22759939-22759983                           | NM_016888:-225    | B3gnt2        | PROMOTER               | 0.378                                           | 0.447                            | 1284.53             | 574.01              | 0.169                            | 1059.94             | 178.86              |
| A_68_P25958415 | chr8:74225497-74225541                            | NM_028189:181     | B3gnt3        | INSIDE                 | 0.422                                           | 0.737                            | 2143.45             | 1580.77             | 0.311                            | 1563.69             | 486.64              |
| A_68_P24056045 | chr5:123958382-123958426                          | NM_198611:-2064   | B3gnt4        | PROMOTER               | 0.210                                           | 0.724                            | 2214.58             | 1603.82             | 0.152                            | 1378.04             | 209.88              |
| A_68_P24056049 | chr5:123958827-123958871                          | NM_198611:-1620   | B3gnt4        | PROMOTER               | 0.471                                           | 0.661                            | 2449.16             | 1620.11             | 0.312                            | 2061.15             | 642.77              |
| A_68_P24056050 | chr5:123958945-123958990                          | NM_198611:-1501   | B3gnt4        | PROMOTER               | 0.370                                           | 0.545                            | 1243.02             | 677.99              | 0.202                            | 988.45              | 199.35              |
| A_68_P24056051 | chr5:123959009-123959060                          | NM_198611:-1434   | B3gnt4        | PROMOTER               | 0.279                                           | 0.596                            | 1020.64             | 608.48              | 0.166                            | 712.01              | 118.30              |
| A_68_P25354426 | chr7:105342464-105342508                          | NM_001081167:5499 | B3gnt6        | INSIDE                 | 0.309                                           | 0.544                            | 1800.99             | 980.45              | 0.168                            | 1510.86             | 254.19              |
| A_68_P25354431 | chr7:105343001-105343045                          | NM_001081167:4963 | B3gnt6        | INSIDE                 | 0.384                                           | 0.645                            | 1620.36             | 1045.61             | 0.248                            | 1423.85             | 352.46              |
| A_68_P25354432 | chr7:105343075-105343119                          | NM_001081167:4889 | B3gnt6        | INSIDE                 | 0.352                                           | 0.593                            | 1579.08             | 937.11              | 0.209                            | 1334.57             | 278.92              |
| A_68_P20411442 | chr1:88199826-88199871                            | NM_145222:53      | B3gnt7        | INSIDE                 | 0.255                                           | 0.510                            | 1093.64             | 557.52              | 0.130                            | 927.82              | 120.66              |
| A_68_P25010985 | chr7:26412400-26412444                            | NM_001036740:-220 | B3gnt8        | PROMOTER               | 0.380                                           | 1.663                            | 4751.97             | 7900.87             | 0.632                            | 3194.05             | 2020.21             |
| A_68_P26132516 | chr8:107778018-107778071                          | NM_178879:1007    | B3gnt9-ps     | INSIDE                 | 0.279                                           | 0.618                            | 863.99              | 533.71              | 0.172                            | 713.52              | 122.82              |
| A_68_P26132522 | chr8:107778665-107778709                          | NM_178879:365     | B3gnt9-ps     | INSIDE                 | 0.405                                           | 0.596                            | 1716.07             | 1023.62             | 0.242                            | 1234.29             | 298.28              |
| A_68_P28191918 | chr11:121533998-121534047                         | NM_178664:443     | B3gnt11       | INSIDE                 | 0.224                                           | 1.567                            | 1903.51             | 2983.37             | 0.351                            | 1321.69             | 464.28              |

| ProbeName      | Target position of probe on CpG island microarray | TargetID          | GeneSymbol    | CpG island Description | Ratio of relative methylation (TiO2-NP/Vehicle) | Sham group                       |                     |                     | TiO <sub>2</sub> -H group        |                     |                     |
|----------------|---------------------------------------------------|-------------------|---------------|------------------------|-------------------------------------------------|----------------------------------|---------------------|---------------------|----------------------------------|---------------------|---------------------|
|                |                                                   |                   |               |                        |                                                 | Relative methylation (Cy-5/Cy-3) | Cy-3 signal (Input) | Cy-5 signal (MeDIP) | Relative methylation (Cy-5/Cy-3) | Cy-3 signal (Input) | Cy-5 signal (MeDIP) |
| A_68_P28191919 | chr11:121534104-121534151                         | NM_178664:338     | B3gnt1        | INSIDE                 | 0.287                                           | 0.630                            | 876.92              | 552.82              | 0.181                            | 659.65              | 119.51              |
| A_68_P31791363 | chr18:67503527-67503573                           | NR_033214:207     | B430212C06Rik | INSIDE                 | 0.062                                           | 1.525                            | 1796.39             | 2738.65             | 0.095                            | 1274.39             | 120.93              |
| A_68_P31791364 | chr18:67503647-67503691                           | NR_033214:89      | B430212C06Rik | INSIDE                 | 0.359                                           | 0.645                            | 4521.54             | 2917.14             | 0.231                            | 3609.29             | 834.84              |
| A_68_P27534317 | chr10:126602065-126602109                         | NM_008080:-194    | B4galnt1      | PROMOTER               | 0.130                                           | 0.678                            | 2554.98             | 1733.41             | 0.088                            | 1791.88             | 158.48              |
| A_68_P27534361 | chr10:126607747-126607791                         | NM_027739:4882    | B4galnt1      | INSIDE                 | 0.455                                           | 0.603                            | 1381.62             | 833.06              | 0.274                            | 1141.31             | 312.97              |
| A_68_P27534362 | chr10:126607844-126607888                         | NM_027739:4980    | B4galnt1      | INSIDE                 | 0.206                                           | 1.623                            | 5915.14             | 9597.99             | 0.335                            | 4256.99             | 1425.98             |
| A_68_P27534325 | chr10:126602946-126602990                         | NM_027739:82      | B4galnt1      | INSIDE                 | 0.667                                           | 0.488                            | 1792.27             | 874.65              | 0.326                            | 1549.71             | 504.52              |
| A_68_P28041223 | chr11:95720113-95720157                           | NM_008081:56051   | B4galnt2      | DOWNSTREAM             | 0.164                                           | 0.706                            | 3433.64             | 2424.23             | 0.116                            | 2318.82             | 268.57              |
| A_68_P28041229 | chr11:95720981-95721025                           | NM_008081:55183   | B4galnt2      | DOWNSTREAM             | 0.546                                           | 0.659                            | 908.26              | 598.24              | 0.360                            | 803.74              | 289.06              |
| A_68_P28041231 | chr11:95721147-95721199                           | NM_008081:55013   | B4galnt2      | DOWNSTREAM             | 0.129                                           | 0.632                            | 1736.33             | 1097.68             | 0.082                            | 1457.13             | 119.06              |
| A_68_P24797813 | chr6:120244449-120244493                          | NM_198884:107     | B4galnt3      | INSIDE                 | 0.432                                           | 0.596                            | 1611.33             | 960.49              | 0.258                            | 1288.11             | 331.77              |
| A_68_P25586435 | chr7:148246749-148246793                          | NM_177897:-402    | B4galnt4      | PROMOTER               | 0.508                                           | 0.609                            | 864.20              | 526.70              | 0.309                            | 774.20              | 239.57              |
| A_68_P22859202 | chr4:40801217-40801261                            | NM_022305:-207    | B4galnt1      | PROMOTER               | 0.256                                           | 0.655                            | 5248.09             | 3439.66             | 0.168                            | 3734.72             | 626.73              |
| A_68_P20827006 | chr1:173200478-173200522                          | NM_020579:42      | B4galnt3      | INSIDE                 | 0.214                                           | 0.567                            | 1207.57             | 684.57              | 0.122                            | 980.32              | 119.18              |
| A_68_P20827008 | chr1:173200751-173200795                          | NM_020579:314     | B4galnt3      | INSIDE                 | 0.161                                           | 0.461                            | 2298.72             | 1059.57             | 0.074                            | 1584.77             | 117.29              |
| A_68_P21835087 | chr2:167174410-167174454                          | NM_019835:246     | B4galnt5      | INSIDE                 | 0.334                                           | 0.599                            | 1762.22             | 1055.89             | 0.200                            | 1334.71             | 267.18              |
| A_68_P31541309 | chr18:20904102-20904146                           | NM_019737:781     | B4galnt6      | INSIDE                 | 0.630                                           | 0.559                            | 3266.39             | 1827.17             | 0.352                            | 2408.73             | 848.99              |
| A_68_P31541315 | chr18:20904732-20904776                           | NM_019737:151     | B4galnt6      | INSIDE                 | 0.496                                           | 0.483                            | 3673.30             | 1774.40             | 0.239                            | 2711.68             | 649.15              |
| A_68_P24248435 | chr6:13627675-13627719                            | NM_175312:270     | B630005N14Rik | INSIDE                 | 0.447                                           | 0.495                            | 3160.95             | 1563.50             | 0.221                            | 2444.29             | 540.72              |
| A_68_P24248438 | chr6:13628084-13628128                            | NM_175312:-140    | B630005N14Rik | PROMOTER               | 0.604                                           | 0.604                            | 3333.22             | 2014.92             | 0.365                            | 2409.21             | 879.89              |
| A_68_P23440041 | chr4:155069180-155069224                          | NM_178699:752     | B930041F14Rik | INSIDE                 | 0.201                                           | 0.433                            | 2290.82             | 992.66              | 0.087                            | 1698.61             | 147.58              |
| A_68_P28739136 | chr12:111829407-111829460                         | NR_033340:-150    | B930059L03Rik | PROMOTER               | 0.184                                           | 0.461                            | 1918.56             | 884.50              | 0.085                            | 1387.78             | 117.67              |
| A_68_P28739140 | chr12:111829834-111829881                         | NR_033340:274     | B930059L03Rik | INSIDE                 | 0.253                                           | 0.419                            | 1487.94             | 622.74              | 0.106                            | 1104.94             | 116.79              |
| A_68_P25011291 | chr7:26466045-26466089                            | NM_172148:-110    | B9d2          | DIVERGENT_PROMOTER     | 0.249                                           | 0.494                            | 1170.17             | 577.54              | 0.123                            | 1002.37             | 123.37              |
| A_68_P24142832 | chr5:141180716-141180760                          | NM_172724:-238    | Baat1         | DIVERGENT_PROMOTER     | 0.561                                           | 0.612                            | 2843.49             | 1739.02             | 0.343                            | 2029.52             | 696.21              |
| A_68_P26476278 | chr9:45646743-45646787                            | NM_001145947:153  | Bace1         | INSIDE                 | 0.593                                           | 0.651                            | 1643.77             | 1069.63             | 0.386                            | 1365.52             | 527.25              |
| A_68_P31936824 | chr19:7016562-7016606                             | NM_007522:240     | Bad           | INSIDE                 | 0.335                                           | 0.552                            | 1852.09             | 1022.11             | 0.185                            | 1346.95             | 248.86              |
| A_68_P22859646 | chr4:40894916-40894962                            | NM_001171739:389  | Bag1          | INSIDE                 | 0.252                                           | 0.438                            | 1370.07             | 600.23              | 0.110                            | 1093.08             | 120.50              |
| A_68_P22859648 | chr4:40895242-40895286                            | NM_001171739:63   | Bag1          | INSIDE                 | 0.208                                           | 0.672                            | 1045.28             | 702.02              | 0.139                            | 870.47              | 121.42              |
| A_68_P25729004 | chr8:26895328-26895372                            | NM_026121:331     | Bag4          | INSIDE                 | 0.257                                           | 0.726                            | 2088.94             | 1516.27             | 0.187                            | 1593.79             | 297.73              |
| A_68_P31157811 | chr17:35271987-35272046                           | NM_057171:-170    | Bag6          | DIVERGENT_PROMOTER     | 0.237                                           | 0.590                            | 913.18              | 538.76              | 0.140                            | 835.90              | 116.77              |
| A_68_P31157814 | chr17:35272332-35272376                           | NM_057171:168     | Bag6          | INSIDE                 | 0.527                                           | 0.550                            | 1620.34             | 891.65              | 0.290                            | 1254.70             | 363.55              |
| A_68_P31157817 | chr17:35272686-35272730                           | NM_057171:522     | Bag6          | INSIDE                 | 0.161                                           | 0.451                            | 2178.45             | 982.58              | 0.073                            | 1588.13             | 115.64              |
| A_68_P28183217 | chr11:120094827-120094871                         | NM_198423:588     | Bahcc1        | INSIDE                 | 0.254                                           | 0.580                            | 1341.64             | 778.34              | 0.147                            | 1091.17             | 160.66              |
| A_68_P28183223 | chr11:120095537-120095581                         | NM_198423:1298    | Bahcc1        | INSIDE                 | 0.197                                           | 0.628                            | 3099.37             | 1945.17             | 0.123                            | 2157.04             | 266.27              |
| A_68_P28183224 | chr11:120095621-120095666                         | NM_198423:1383    | Bahcc1        | INSIDE                 | 0.655                                           | 0.647                            | 2464.21             | 1595.23             | 0.424                            | 1712.63             | 726.58              |
| A_68_P21566789 | chr2:118726839-118726885                          | NM_001045523:-488 | Bahd1         | PROMOTER               | 0.043                                           | 4.027                            | 1664.43             | 6703.31             | 0.172                            | 953.62              | 164.43              |
| A_68_P21566797 | chr2:118728139-118728183                          | NM_001045523:810  | Bahd1         | INSIDE                 | 0.301                                           | 0.538                            | 3665.07             | 1970.45             | 0.162                            | 2797.55             | 451.99              |
| A_68_P21566798 | chr2:118728254-118728298                          | NM_001045523:926  | Bahd1         | INSIDE                 | 0.491                                           | 0.615                            | 1793.63             | 1103.81             | 0.302                            | 1414.19             | 427.61              |
| A_68_P30337592 | chr15:74346503-74346547                           | NM_174991:-101    | Bai1          | PROMOTER               | 0.137                                           | 0.677                            | 1685.50             | 1141.21             | 0.093                            | 1259.89             | 116.84              |
| A_68_P30337596 | chr15:74347238-74347282                           | NM_174991:635     | Bai1          | INSIDE                 | 0.655                                           | 0.607                            | 1736.25             | 1053.94             | 0.398                            | 1380.84             | 549.00              |
| A_68_P30337603 | chr15:74348034-74348078                           | NM_174991:1431    | Bai1          | INSIDE                 | 0.160                                           | 0.511                            | 2107.94             | 1077.42             | 0.082                            | 1478.80             | 120.66              |
| A_68_P30337616 | chr15:74349537-74349581                           | NM_174991:2933    | Bai1          | INSIDE                 | 0.355                                           | 0.591                            | 1613.67             | 954.27              | 0.210                            | 1301.66             | 273.33              |
| A_68_P30337992 | chr15:74394645-74394689                           | NM_174991:48041   | Bai1          | INSIDE                 | 0.483                                           | 0.665                            | 1714.56             | 1140.18             | 0.321                            | 1333.96             | 428.37              |

| ProbeName      | Target position of probe on CpG island microarray | TargetID           | GeneSymbol | CpG island Description | Ratio of relative methylation (TiO2-NP/Vehicle) | Sham group                       |                     |                     | TiO <sub>2</sub> -H group        |                     |                     |
|----------------|---------------------------------------------------|--------------------|------------|------------------------|-------------------------------------------------|----------------------------------|---------------------|---------------------|----------------------------------|---------------------|---------------------|
|                |                                                   |                    |            |                        |                                                 | Relative methylation (Cy-5/Cy-3) | Cy-3 signal (Input) | Cy-5 signal (MeDIP) | Relative methylation (Cy-5/Cy-3) | Cy-3 signal (Input) | Cy-5 signal (MeDIP) |
| A_68_P23299521 | chr4:129662643-129662687                          | NM_001199696:343   | Bai2       | INSIDE                 | 0.294                                           | 0.677                            | 1184.37             | 801.57              | 0.199                            | 840.45              | 167.23              |
| A_68_P23299525 | chr4:129662999-129663043                          | NM_001199696:699   | Bai2       | INSIDE                 | 0.177                                           | 1.930                            | 5092.59             | 9827.63             | 0.342                            | 2909.27             | 994.51              |
| A_68_P23299526 | chr4:129663110-129663154                          | NM_001199696:811   | Bai2       | INSIDE                 | 0.173                                           | 1.847                            | 10078.00            | 18611.84            | 0.319                            | 6203.11             | 1981.77             |
| A_68_P20101397 | chr1:25887463-25887509                            | NM_175642:-934     | Bai3       | PROMOTER               | 0.080                                           | 0.599                            | 3280.46             | 1965.75             | 0.048                            | 2529.25             | 121.29              |
| A_68_P28181189 | chr11:119803657-119803701                         | NM_001037754:-727  | Baiap2     | PROMOTER               | 0.341                                           | 0.550                            | 2487.62             | 1367.46             | 0.187                            | 1801.34             | 337.58              |
| A_68_P28181190 | chr11:119803788-119803832                         | NM_001037754:-595  | Baiap2     | PROMOTER               | 0.278                                           | 0.531                            | 3460.85             | 1837.20             | 0.148                            | 2541.24             | 374.90              |
| A_68_P28181191 | chr11:119803923-119803967                         | NM_001037754:-461  | Baiap2     | PROMOTER               | 0.657                                           | 0.387                            | 1383.14             | 535.48              | 0.254                            | 1139.96             | 290.04              |
| A_68_P24160783 | chr5:145118513-145118557                          | NM_025833:447      | Baiap211   | INSIDE                 | 0.602                                           | 0.630                            | 2141.54             | 1348.14             | 0.379                            | 1824.01             | 691.42              |
| A_68_P24160789 | chr5:145119094-145119138                          | NM_025833:-135     | Baiap211   | PROMOTER               | 0.155                                           | 0.461                            | 2338.47             | 1077.40             | 0.071                            | 1862.46             | 132.88              |
| A_68_P24160791 | chr5:145119346-145119390                          | NM_025833:-387     | Baiap211   | PROMOTER               | 0.197                                           | 0.511                            | 2737.46             | 1399.69             | 0.101                            | 1963.30             | 197.57              |
| A_68_P30365368 | chr15:79091566-79091610                           | NM_177580:24351    | Baiap212   | INSIDE                 | 0.348                                           | 0.686                            | 2382.77             | 1635.65             | 0.239                            | 2087.92             | 498.34              |
| A_68_P31102614 | chr17:25392741-25392785                           | NM_001163270:547   | Baiap3     | INSIDE                 | 0.126                                           | 0.569                            | 2446.22             | 1392.56             | 0.072                            | 1652.46             | 118.29              |
| A_68_P31102615 | chr17:25392896-25392940                           | NM_001163270:391   | Baiap3     | INSIDE                 | 0.187                                           | 0.710                            | 1736.49             | 1232.94             | 0.133                            | 1359.67             | 180.28              |
| A_68_P31102616 | chr17:25393043-25393087                           | NM_001163270:245   | Baiap3     | INSIDE                 | 0.206                                           | 0.484                            | 1772.69             | 858.10              | 0.100                            | 1298.53             | 129.50              |
| A_68_P31458877 | chr18:3508057-3508101                             | NM_026505:124      | Bambi      | INSIDE                 | 0.123                                           | 0.667                            | 1882.72             | 1255.86             | 0.082                            | 1447.38             | 119.13              |
| A_68_P31458881 | chr18:3508571-3508630                             | NM_026505:646      | Bambi      | INSIDE                 | 0.143                                           | 0.715                            | 1410.05             | 1008.83             | 0.102                            | 1201.39             | 122.95              |
| A_68_P31928284 | chr19:5366667-5366713                             | NM_011793:-45      | Banf1      | DIVERGENT_PROMOTER     | 0.416                                           | 0.595                            | 996.83              | 592.66              | 0.247                            | 718.76              | 177.78              |
| A_68_P21094090 | chr2:28765327-28765371                            | NM_019446:6593     | Barh11     | INSIDE                 | 0.042                                           | 1.337                            | 3319.03             | 4438.08             | 0.057                            | 2144.44             | 121.85              |
| A_68_P21094142 | chr2:28771352-28771396                            | NM_019446:567      | Barh11     | INSIDE                 | 0.456                                           | 0.532                            | 2671.45             | 1421.37             | 0.243                            | 1808.28             | 438.59              |
| A_68_P21094157 | chr2:28773265-28773309                            | NM_001164186:-1326 | Barh11     | PROMOTER               | 0.411                                           | 0.696                            | 2445.75             | 1702.23             | 0.286                            | 1840.68             | 527.06              |
| A_68_P23961348 | chr5:106886251-106886295                          | NM_001005477:913   | Barh12     | INSIDE                 | 0.135                                           | 0.591                            | 2335.12             | 1379.35             | 0.080                            | 1669.97             | 133.27              |
| A_68_P23961352 | chr5:106886727-106886771                          | NM_001005477:437   | Barh12     | INSIDE                 | 0.274                                           | 0.495                            | 2262.70             | 1119.67             | 0.135                            | 1646.56             | 222.88              |
| A_68_P23961361 | chr5:106887861-106887906                          | NM_001005477:-698  | Barh12     | PROMOTER               | 0.108                                           | 0.687                            | 2747.15             | 1888.55             | 0.074                            | 2022.23             | 149.99              |
| A_68_P29020643 | chr13:48755179-48755223                           | NM_007526:-3204    | Barx1      | PROMOTER               | 0.394                                           | 0.473                            | 1255.55             | 593.95              | 0.186                            | 993.02              | 185.15              |
| A_68_P29020701 | chr13:48761510-48761554                           | NM_007526:3128     | Barx1      | INSIDE                 | 0.131                                           | 0.583                            | 2230.01             | 1299.99             | 0.077                            | 1576.23             | 120.77              |
| A_68_P29020720 | chr13:48764426-48764470                           | NM_007526:6044     | Barx1      | DOWNSTREAM             | 0.415                                           | 0.533                            | 3856.85             | 2055.47             | 0.221                            | 2861.55             | 632.80              |
| A_68_P26402553 | chr9:31721424-31721468                            | NM_013800:-576     | Barx2      | PROMOTER               | 0.456                                           | 0.621                            | 2599.53             | 1613.81             | 0.283                            | 2212.96             | 626.13              |
| A_68_P20936238 | chr1:192922619-192922663                          | NM_030060:348      | Batf3      | INSIDE                 | 0.245                                           | 0.611                            | 1599.85             | 978.03              | 0.150                            | 1215.48             | 182.03              |
| A_68_P25093324 | chr7:52722052-52722096                            | NM_007527:194      | Bax        | INSIDE                 | 0.338                                           | 0.512                            | 1886.42             | 965.17              | 0.173                            | 1529.95             | 264.53              |
| A_68_P25093327 | chr7:52722315-52722359                            | NM_007527:-68      | Bax        | PROMOTER               | 0.210                                           | 0.440                            | 1677.04             | 737.35              | 0.092                            | 1334.59             | 123.19              |
| A_68_P28450015 | chr12:56085848-56085892                           | NM_013815:1453     | Baz1a      | INSIDE                 | 0.365                                           | 0.680                            | 2723.92             | 1851.08             | 0.248                            | 2147.50             | 532.50              |
| A_68_P24115147 | chr5:135662582-135662626                          | NM_011714:-588     | Baz1b      | PROMOTER               | 0.390                                           | 0.583                            | 2093.19             | 1220.19             | 0.227                            | 1622.42             | 368.86              |
| A_68_P24115149 | chr5:135662813-135662862                          | NM_011714:-355     | Baz1b      | PROMOTER               | 0.290                                           | 0.480                            | 1075.80             | 516.45              | 0.139                            | 874.52              | 121.72              |
| A_68_P24115153 | chr5:135663286-135663330                          | NM_011714:116      | Baz1b      | INSIDE                 | 0.476                                           | 0.659                            | 1057.98             | 697.28              | 0.314                            | 927.00              | 290.73              |
| A_68_P27539540 | chr10:127534403-127534447                         | NM_054078:4586     | Baz2a      | INSIDE                 | 0.413                                           | 0.431                            | 2288.05             | 985.78              | 0.178                            | 2055.08             | 365.44              |
| A_68_P24330581 | chr6:30123488-30123532                            | NR_038124:-3112    | BB283400   | DIVERGENT_PROMOTER     | 0.175                                           | 0.640                            | 3801.39             | 2431.18             | 0.112                            | 2702.26             | 302.72              |
| A_68_P24330585 | chr6:30124034-30124078                            | NR_038124:-2566    | BB283400   | DIVERGENT_PROMOTER     | 0.223                                           | 0.446                            | 1567.77             | 698.75              | 0.099                            | 1168.43             | 116.05              |
| A_68_P24330599 | chr6:30125667-30125711                            | NR_038124:-934     | BB283400   | DIVERGENT_PROMOTER     | 0.529                                           | 0.471                            | 1364.52             | 642.08              | 0.249                            | 1005.33             | 250.05              |
| A_68_P24330603 | chr6:30126052-30126101                            | NR_038124:-546     | BB283400   | DIVERGENT_PROMOTER     | 0.238                                           | 0.596                            | 1088.84             | 649.41              | 0.142                            | 830.48              | 118.00              |
| A_68_P24330604 | chr6:30126170-30126214                            | NR_038124:-430     | BB283400   | DIVERGENT_PROMOTER     | 0.239                                           | 0.436                            | 2105.06             | 916.86              | 0.104                            | 1573.25             | 163.47              |
| A_68_P24330605 | chr6:30126242-30126286                            | NR_038124:-358     | BB283400   | DIVERGENT_PROMOTER     | 0.231                                           | 0.510                            | 2454.40             | 1251.63             | 0.118                            | 1994.97             | 234.89              |
| A_68_P24980778 | chr7:16897508-16897552                            | NM_133234:2599     | Bbc3       | INSIDE                 | 0.650                                           | 0.515                            | 1396.88             | 719.35              | 0.335                            | 1236.23             | 413.85              |
| A_68_P27448190 | chr10:110735869-110735913                         | NM_027914:156      | Bbs10      | INSIDE                 | 0.372                                           | 0.497                            | 1259.28             | 626.04              | 0.185                            | 941.39              | 173.95              |
| A_68_P26075475 | chr8:96622393-96622437                            | NM_026116:297      | Bbs2       | INSIDE                 | 0.430                                           | 0.383                            | 1914.53             | 733.23              | 0.165                            | 1329.59             | 219.11              |

| ProbeName      | Target position of probe on CpG island microarray | TargetID           | GeneSymbol | CpG island Description | Ratio of relative methylation (TiO2-NP/Vehicle) | Sham group                       |                     |                     | TiO <sub>2</sub> -H group        |                     |                     |
|----------------|---------------------------------------------------|--------------------|------------|------------------------|-------------------------------------------------|----------------------------------|---------------------|---------------------|----------------------------------|---------------------|---------------------|
|                |                                                   |                    |            |                        |                                                 | Relative methylation (Cy-5/Cy-3) | Cy-3 signal (Input) | Cy-5 signal (MeDIP) | Relative methylation (Cy-5/Cy-3) | Cy-3 signal (Input) | Cy-5 signal (MeDIP) |
| A_68_P26352023 | chr9:22280042-22280086                            | NM_178415:-94      | Bbs9       | DIVERGENT_PROMOTER     | 0.581                                           | 0.453                            | 2385.20             | 1080.37             | 0.263                            | 1848.16             | 486.01              |
| A_68_P23284269 | chr4:126921347-126921391                          | NM_030252:341      | BC003266   | INSIDE                 | 0.564                                           | 0.460                            | 1692.80             | 778.92              | 0.260                            | 1393.23             | 361.55              |
| A_68_P31102143 | chr17:25321627-25321671                           | NM_183150:143      | BC003965   | INSIDE                 | 0.356                                           | 0.693                            | 1465.43             | 1015.66             | 0.247                            | 1277.64             | 315.45              |
| A_68_P21106324 | chr2:30837544-30837588                            | NM_144885:-105     | BC005624   | DIVERGENT_PROMOTER     | 0.074                                           | 0.699                            | 4223.37             | 2950.23             | 0.052                            | 2853.65             | 147.36              |
| A_68_P27279426 | chr10:79337278-79337322                           | NM_001170935:79    | BC005764   | INSIDE                 | 0.270                                           | 0.575                            | 1006.84             | 578.86              | 0.155                            | 765.90              | 118.75              |
| A_68_P27279427 | chr10:79337379-79337423                           | NM_001170935:-21   | BC005764   | DIVERGENT_PROMOTER     | 0.520                                           | 0.697                            | 3505.25             | 2441.76             | 0.362                            | 2603.48             | 942.18              |
| A_68_P26920732 | chr10:7500225-7500275                             | NM_145418:465      | BC013529   | INSIDE                 | 0.051                                           | 0.720                            | 4171.11             | 3004.32             | 0.037                            | 3130.63             | 114.96              |
| A_68_P23314122 | chr4:132352279-132352323                          | NM_001033308:-21   | NM_0013712 | PROMOTER               | 0.257                                           | 0.524                            | 1021.92             | 535.19              | 0.134                            | 881.43              | 118.45              |
| A_68_P28788962 | chr13:3610060-3610104                             | NM_134063:272      | BC016423   | INSIDE                 | 0.264                                           | 0.552                            | 1324.53             | 730.87              | 0.146                            | 1111.58             | 161.92              |
| A_68_P26349632 | chr9:21741348-21741392                            | NM_144935:-1347    | BC018242   | PROMOTER               | 0.405                                           | 0.437                            | 1486.50             | 649.65              | 0.177                            | 1174.97             | 207.88              |
| A_68_P29122630 | chr13:70776238-70776282                           | NM_144837:252      | BC018507   | INSIDE                 | 0.152                                           | 0.658                            | 4530.78             | 2981.85             | 0.100                            | 3223.00             | 323.04              |
| A_68_P26254625 | chr8:128434525-128434569                          | NM_145608:197      | BC021891   | INSIDE                 | 0.440                                           | 0.440                            | 1331.18             | 586.11              | 0.194                            | 1002.52             | 194.30              |
| A_68_P32448984 | chrX:67730148-67730192                            | NM_001033328:48    | BC023829   | INSIDE                 | 0.130                                           | 1.472                            | 1503.18             | 2212.90             | 0.191                            | 603.15              | 115.41              |
| A_68_P32448986 | chrX:67730422-67730470                            | NM_001033328:-228  | BC023829   | PROMOTER               | 0.129                                           | 2.099                            | 1192.19             | 2502.00             | 0.271                            | 455.59              | 123.30              |
| A_68_P28976946 | chr13:41344925-41344972                           | NM_001135577:-264  | BC024659   | PROMOTER               | 0.252                                           | 0.491                            | 1292.73             | 634.97              | 0.124                            | 984.42              | 121.72              |
| A_68_P28976947 | chr13:41345064-41345108                           | NM_001135577:-126  | BC024659   | PROMOTER               | 0.479                                           | 0.526                            | 2012.27             | 1059.02             | 0.252                            | 1435.63             | 361.73              |
| A_68_P28976951 | chr13:41345598-41345642                           | NM_001135577:408   | BC024659   | INSIDE                 | 0.151                                           | 0.571                            | 2558.07             | 1461.88             | 0.086                            | 1951.13             | 168.75              |
| A_68_P22941606 | chr4:56815104-56815148                            | NM_001081420:-74   | BC026590   | PROMOTER               | 0.240                                           | 0.624                            | 2061.16             | 1286.76             | 0.150                            | 1541.91             | 230.83              |
| A_68_P21072311 | chr2:25316393-25316437                            | NM_153557:200      | BC029214   | INSIDE                 | 0.385                                           | 0.633                            | 2621.56             | 1659.14             | 0.244                            | 1888.00             | 460.39              |
| A_68_P21072314 | chr2:25316726-25316774                            | NM_153557:-136     | BC029214   | PROMOTER               | 0.260                                           | 0.557                            | 1151.09             | 640.91              | 0.145                            | 816.77              | 118.22              |
| A_68_P27315615 | chr10:86168388-86168432                           | NM_001003939:-145  | BC030307   | DIVERGENT_PROMOTER     | 0.294                                           | 0.445                            | 1172.76             | 521.83              | 0.217                            | 927.24              | 121.32              |
| A_68_P25898923 | chr8:61391591-61391635                            | NM_173411:1061     | BC030500   | INSIDE                 | 0.354                                           | 0.612                            | 1692.65             | 1035.71             | 0.217                            | 1269.62             | 275.38              |
| A_68_P28078450 | chr11:102110241-102110285                         | NM_153544:67       | BC030867   | INSIDE                 | 0.270                                           | 0.529                            | 1044.74             | 552.68              | 0.143                            | 859.44              | 122.64              |
| A_68_P31834411 | chr18:75165635-75165679                           | NM_001001181:103   | BC031181   | INSIDE                 | 0.133                                           | 0.492                            | 2926.85             | 1439.99             | 0.065                            | 2239.99             | 146.57              |
| A_68_P31834412 | chr18:75165713-75165757                           | NM_001001181:181   | BC031181   | INSIDE                 | 0.186                                           | 0.627                            | 2602.69             | 1632.91             | 0.117                            | 1798.45             | 210.31              |
| A_68_P30684012 | chr16:38089843-38089887                           | NR_033221:-518     | BC031361   | PROMOTER               | 0.433                                           | 0.387                            | 1469.59             | 568.10              | 0.167                            | 1398.26             | 234.14              |
| A_68_P20878147 | chr1:182781059-182781103                          | NM_145943:-201     | BC031781   | PROMOTER               | 0.230                                           | 0.459                            | 2994.02             | 1372.79             | 0.105                            | 2437.79             | 256.85              |
| A_68_P20878149 | chr1:182781262-182781306                          | NM_145943:3        | BC031781   | INSIDE                 | 0.286                                           | 0.625                            | 917.25              | 573.30              | 0.179                            | 688.08              | 123.08              |
| A_68_P24129541 | chr5:138705342-138705401                          | NM_153161:-91      | BC037034   | PROMOTER               | 0.066                                           | 1.555                            | 1655.49             | 2573.91             | 0.102                            | 1150.94             | 117.60              |
| A_68_P26229676 | chr8:124431860-124431904                          | NM_001033485:150   | BC048644   | INSIDE                 | 0.244                                           | 0.520                            | 1210.66             | 628.95              | 0.127                            | 932.86              | 118.29              |
| A_68_P25032100 | chr7:31337206-31337250                            | NM_183321:63       | BC053749   | INSIDE                 | 0.211                                           | 0.678                            | 1287.72             | 873.66              | 0.143                            | 968.38              | 138.38              |
| A_68_P25032103 | chr7:31337454-31337505                            | NM_183321:-188     | BC053749   | DIVERGENT_PROMOTER     | 0.255                                           | 0.594                            | 1222.36             | 725.97              | 0.152                            | 829.22              | 125.79              |
| A_68_P20786425 | chr1:165924761-165924805                          | NM_201364:130      | BC055324   | INSIDE                 | 0.634                                           | 0.637                            | 5119.83             | 3263.62             | 0.404                            | 3884.09             | 1570.60             |
| A_68_P24004706 | chr5:115021554-115021604                          | NM_001004180:3319  | BC057022   | INSIDE                 | 0.100                                           | 1.572                            | 2898.66             | 4556.83             | 0.157                            | 1713.57             | 269.70              |
| A_68_P24004707 | chr5:115021632-115021676                          | NM_001004180:3395  | NM_0057022 | INSIDE                 | 0.223                                           | 0.650                            | 3315.15             | 2155.60             | 0.145                            | 2225.50             | 322.35              |
| A_68_P24004708 | chr5:115021723-115021774                          | NM_001004180:3489  | BC057022   | INSIDE                 | 0.300                                           | 0.522                            | 1088.32             | 568.08              | 0.157                            | 764.33              | 119.65              |
| A_68_P21040894 | chr2:18612064-18612108                            | NM_001001334:-8562 | BC061194   | PROMOTER               | 0.527                                           | 0.636                            | 879.57              | 559.69              | 0.335                            | 756.60              | 253.70              |
| A_68_P21040966 | chr2:18620478-18620522                            | NM_001001334:-148  | BC061194   | PROMOTER               | 0.295                                           | 0.461                            | 1908.34             | 880.42              | 0.136                            | 1521.56             | 207.18              |
| A_68_P25616527 | chr8:4206553-4206597                              | NM_207203:10738    | BC068157   | DOWNSTREAM             | 0.345                                           | 0.649                            | 1674.15             | 1086.44             | 0.224                            | 1142.10             | 256.05              |
| A_68_P30425163 | chr15:89259930-89259974                           | NR_004843:406      | BC090627   | INSIDE                 | 0.195                                           | 0.544                            | 3456.39             | 1881.49             | 0.106                            | 2649.67             | 281.50              |
| A_68_P22482404 | chr3:122123031-122123075                          | NM_013867:355      | Bear3      | INSIDE                 | 0.651                                           | 0.688                            | 1892.26             | 1301.59             | 0.448                            | 1459.46             | 653.58              |
| A_68_P24920736 | chr6:144996969-144997013                          | NM_001024468:342   | Bcat1      | INSIDE                 | 0.184                                           | 0.610                            | 3431.78             | 2091.70             | 0.112                            | 2598.47             | 292.15              |
| A_68_P24920859 | chr6:145024368-145024419                          | NM_007532:284      | Bcat1      | INSIDE                 | 0.192                                           | 0.566                            | 1492.74             | 844.31              | 0.108                            | 1078.33             | 116.81              |
| A_68_P25093837 | chr7:52825440-52825491                            | NM_009737:-267     | Bcat2      | PROMOTER               | 0.092                                           | 1.931                            | 1625.10             | 3138.28             | 0.177                            | 1068.24             | 189.09              |

| ProbeName      | Target position of probe on CpG island microarray | TargetID           | GeneSymbol | CpG island Description | Ratio of relative methylation (TiO2-NP/Vehicle) | Sham group                       |                     |                     | TiO <sub>2</sub> -H group        |                     |                     |
|----------------|---------------------------------------------------|--------------------|------------|------------------------|-------------------------------------------------|----------------------------------|---------------------|---------------------|----------------------------------|---------------------|---------------------|
|                |                                                   |                    |            |                        |                                                 | Relative methylation (Cy-5/Cy-3) | Cy-3 signal (Input) | Cy-5 signal (MeDIP) | Relative methylation (Cy-5/Cy-3) | Cy-3 signal (Input) | Cy-5 signal (MeDIP) |
| A_68_P25093840 | chr7:52825839-52825883                            | NM_009737:128      | Bcat2      | INSIDE                 | 0.430                                           | 0.404                            | 2126.05             | 858.33              | 0.174                            | 1831.57             | 318.13              |
| A_68_P25093841 | chr7:52825908-52825952                            | NM_009737:198      | Bcat2      | INSIDE                 | 0.143                                           | 0.524                            | 2014.69             | 1054.89             | 0.075                            | 1611.22             | 120.81              |
| A_68_P25542189 | chr7:140901181-140901225                          | NM_025392:187      | Bccip      | INSIDE                 | 0.114                                           | 0.543                            | 2814.16             | 1527.67             | 0.062                            | 1986.22             | 123.34              |
| A_68_P22611615 | chr3:145587665-145587709                          | NM_009740:345      | Bcl10      | INSIDE                 | 0.269                                           | 0.620                            | 1349.91             | 837.35              | 0.167                            | 1077.79             | 179.79              |
| A_68_P27649060 | chr11:23977147-23977191                           | NM_001159289:-887  | Bcl11a     | PROMOTER               | 0.223                                           | 0.636                            | 1174.52             | 746.71              | 0.142                            | 836.81              | 118.72              |
| A_68_P28725020 | chr12:109218453-109218497                         | NM_001079883:23150 | Bcl11b     | INSIDE                 | 0.514                                           | 0.522                            | 1741.54             | 909.57              | 0.269                            | 1359.26             | 365.23              |
| A_68_P28725222 | chr12:109242213-109242257                         | NM_001079883:-610  | Bcl11b     | PROMOTER               | 0.241                                           | 0.588                            | 1544.12             | 908.21              | 0.142                            | 1218.37             | 172.55              |
| A_68_P28725223 | chr12:109242384-109242437                         | NM_001079883:-786  | Bcl11b     | PROMOTER               | 0.227                                           | 0.611                            | 1322.10             | 807.96              | 0.139                            | 977.03              | 135.75              |
| A_68_P28725238 | chr12:109244329-109244373                         | NM_001079883:-2726 | Bcl11b     | PROMOTER               | 0.515                                           | 0.644                            | 1347.74             | 868.21              | 0.332                            | 1134.29             | 376.64              |
| A_68_P20509920 | chr1:108609243-108609287                          | NM_009741:1603     | Bcl2       | INSIDE                 | 0.490                                           | 0.662                            | 1171.34             | 775.04              | 0.324                            | 952.90              | 308.93              |
| A_68_P20509928 | chr1:108610270-108610327                          | NM_009741:569      | Bcl2       | INSIDE                 | 0.150                                           | 0.622                            | 1578.73             | 981.39              | 0.093                            | 1230.71             | 115.06              |
| A_68_P20509929 | chr1:108610390-108610434                          | NM_009741:455      | Bcl2       | INSIDE                 | 0.416                                           | 0.638                            | 1687.46             | 1076.52             | 0.265                            | 1125.49             | 298.72              |
| A_68_P21617362 | chr2:127951410-127951454                          | NM_009754:-341     | Bcl2111    | PROMOTER               | 0.416                                           | 0.608                            | 2537.30             | 1542.87             | 0.253                            | 1871.35             | 473.37              |
| A_68_P21617363 | chr2:127951507-127951551                          | NM_009754:-245     | Bcl2111    | PROMOTER               | 0.131                                           | 0.540                            | 3192.45             | 1724.28             | 0.071                            | 2353.84             | 166.18              |
| A_68_P21617365 | chr2:127951737-127951781                          | NM_009754:-15      | Bcl2111    | PROMOTER               | 0.191                                           | 0.321                            | 3559.69             | 1142.91             | 0.061                            | 2582.36             | 157.98              |
| A_68_P21617369 | chr2:127952159-127952203                          | NM_009754:407      | Bcl2111    | INSIDE                 | 0.521                                           | 0.528                            | 2129.39             | 1124.93             | 0.275                            | 1695.44             | 466.84              |
| A_68_P21617375 | chr2:127952895-127952939                          | NM_009754:1143     | Bcl2111    | INSIDE                 | 0.150                                           | 0.717                            | 2033.76             | 1458.34             | 0.107                            | 1685.58             | 181.05              |
| A_68_P21617370 | chr2:127952278-127952322                          | NM_009754:527      | Bcl2111    | INSIDE                 | 0.668                                           | 0.557                            | 1199.21             | 667.56              | 0.372                            | 939.33              | 349.06              |
| A_68_P24800510 | chr6:120786535-120786579                          | NM_153516:309      | Bcl2113    | INSIDE                 | 0.326                                           | 0.375                            | 2013.72             | 755.91              | 0.122                            | 1678.70             | 205.41              |
| A_68_P24995363 | chr7:20395100-20395149                            | NM_033601:12980    | Bcl3       | INSIDE                 | 0.246                                           | 0.482                            | 1232.37             | 593.66              | 0.118                            | 1010.24             | 119.59              |
| A_68_P30605853 | chr16:23983382-23983426                           | NM_009744:5294     | Bcl6       | INSIDE                 | 0.237                                           | 0.545                            | 1598.52             | 870.94              | 0.129                            | 1300.39             | 168.24              |
| A_68_P27899563 | chr11:70040019-70040063                           | NM_007528:3260     | Bcl6b      | INSIDE                 | 0.254                                           | 0.592                            | 1588.96             | 941.28              | 0.150                            | 1186.63             | 178.42              |
| A_68_P27899564 | chr11:70040111-70040155                           | NM_007528:3168     | Bcl6b      | INSIDE                 | 0.242                                           | 0.548                            | 1105.14             | 605.71              | 0.133                            | 906.96              | 120.48              |
| A_68_P27899586 | chr11:70042779-70042828                           | NM_007528:497      | Bcl6b      | INSIDE                 | 0.178                                           | 0.707                            | 1860.62             | 1315.18             | 0.126                            | 1418.07             | 178.73              |
| A_68_P27899593 | chr11:70043429-70043486                           | NM_007528:-157     | Bcl6b      | DIVERGENT_PROMOTER     | 0.048                                           | 1.531                            | 2278.22             | 3486.99             | 0.073                            | 1668.41             | 122.14              |
| A_68_P24055179 | chr5:123794010-123794061                          | NM_029850:-421     | Bcl7a      | PROMOTER               | 0.275                                           | 0.488                            | 1083.41             | 529.08              | 0.134                            | 900.64              | 121.10              |
| A_68_P24055190 | chr5:123795453-123795497                          | NM_029850:1018     | Bcl7a      | INSIDE                 | 0.347                                           | 0.730                            | 2433.72             | 1775.81             | 0.253                            | 1715.66             | 434.55              |
| A_68_P32260250 | chrX:11654399-11654443                            | NM_029510:3259     | Bcor       | INSIDE                 | 0.099                                           | 1.476                            | 6046.26             | 8925.59             | 0.146                            | 1946.65             | 284.92              |
| A_68_P32260255 | chrX:11655059-11655115                            | NM_029510:2593     | Bcor       | INSIDE                 | 0.525                                           | 0.556                            | 1059.70             | 589.72              | 0.292                            | 446.82              | 130.49              |
| A_68_P32260272 | chrX:11657098-11657142                            | NM_029510:559      | Bcor       | INSIDE                 | 0.047                                           | 1.527                            | 7364.88             | 11244.67            | 0.072                            | 2313.39             | 167.32              |
| A_68_P32260332 | chrX:11664013-11664057                            | NM_029510:-6355    | Bcor       | PROMOTER               | 0.576                                           | 0.588                            | 1667.60             | 981.30              | 0.339                            | 737.01              | 249.92              |
| A_68_P32260348 | chrX:11665608-11665652                            | NM_029510:-7951    | Bcor       | PROMOTER               | 0.319                                           | 0.565                            | 1677.90             | 947.72              | 0.180                            | 676.34              | 121.68              |
| A_68_P32260568 | chrX:11704944-11704992                            | NM_001168321:32513 | Bcor       | INSIDE                 | 0.197                                           | 1.927                            | 2757.03             | 5313.84             | 0.380                            | 1025.70             | 389.31              |
| A_68_P32260572 | chrX:11705418-11705462                            | NM_001168321:32041 | Bcor       | INSIDE                 | 0.467                                           | 0.572                            | 1644.76             | 940.80              | 0.267                            | 615.99              | 164.54              |
| A_68_P32260574 | chrX:11705655-11705699                            | NM_001168321:31805 | Bcor       | INSIDE                 | 0.274                                           | 1.667                            | 5079.86             | 8467.01             | 0.456                            | 1843.53             | 841.12              |
| A_68_P32260575 | chrX:11705762-11705806                            | NM_001168321:31697 | Bcor       | INSIDE                 | 0.120                                           | 2.661                            | 5788.90             | 15404.08            | 0.320                            | 2050.19             | 656.24              |
| A_68_P32260576 | chrX:11705862-11705906                            | NM_001168321:31597 | Bcor       | INSIDE                 | 0.340                                           | 1.523                            | 1805.39             | 2748.90             | 0.517                            | 603.83              | 312.24              |
| A_68_P32260619 | chrX:11710953-11710997                            | NM_001168321:26507 | Bcor       | INSIDE                 | 0.131                                           | 1.496                            | 1663.66             | 2489.66             | 0.196                            | 587.51              | 115.14              |
| A_68_P32260636 | chrX:11712923-11712967                            | NM_001168321:24537 | Bcor       | INSIDE                 | 0.494                                           | 0.527                            | 1614.31             | 851.15              | 0.261                            | 660.37              | 172.06              |
| A_68_P32364048 | chrX:45696786-45696830                            | NM_178782:2274     | Bcor11     | INSIDE                 | 0.218                                           | 1.818                            | 2008.87             | 3651.17             | 0.397                            | 794.03              | 315.28              |
| A_68_P32364049 | chrX:45696991-45697035                            | NM_178782:2478     | Bcor11     | INSIDE                 | 0.573                                           | 3.269                            | 2293.72             | 7497.48             | 1.872                            | 912.24              | 1708.07             |
| A_68_P32364050 | chrX:45697107-45697151                            | NM_178782:2594     | Bcor11     | INSIDE                 | 0.383                                           | 9.469                            | 12523.37            | 118577.60           | 3.626                            | 5339.78             | 19361.94            |
| A_68_P32364052 | chrX:45697351-45697395                            | NM_178782:2838     | Bcor11     | INSIDE                 | 0.157                                           | 2.064                            | 901.87              | 1861.49             | 0.324                            | 365.05              | 118.27              |
| A_68_P32364064 | chrX:45698666-45698710                            | NM_178782:4154     | Bcor11     | INSIDE                 | 0.171                                           | 2.431                            | 1583.53             | 3850.12             | 0.415                            | 827.91              | 343.61              |

| ProbeName      | Target position of probe on CpG island microarray | TargetID          | GeneSymbol | CpG island Description | Ratio of relative methylation (TiO2-NP/Vehicle) | Sham group                       |                     |                     | TiO <sub>2</sub> -H group        |                     |                     |
|----------------|---------------------------------------------------|-------------------|------------|------------------------|-------------------------------------------------|----------------------------------|---------------------|---------------------|----------------------------------|---------------------|---------------------|
|                |                                                   |                   |            |                        |                                                 | Relative methylation (Cy-5/Cy-3) | Cy-3 signal (Input) | Cy-5 signal (MeDIP) | Relative methylation (Cy-5/Cy-3) | Cy-3 signal (Input) | Cy-5 signal (MeDIP) |
| A_68_P32364065 | chrX:45698842-45698886                            | NM_178782:4330    | Bcord1     | INSIDE                 | 0.653                                           | 2.914                            | 865.54              | 2521.90             | 1.904                            | 483.93              | 921.37              |
| A_68_P30647299 | chr16:31430033-31430077                           | NM_001122683:1216 | Bdh1       | INSIDE                 | 0.229                                           | 0.646                            | 983.74              | 635.74              | 0.148                            | 846.49              | 125.33              |
| A_68_P21516613 | chr2:109517788-109517832                          | NM_001048139:1757 | Bdnf       | INSIDE                 | 0.441                                           | 0.689                            | 1157.11             | 797.50              | 0.304                            | 929.69              | 282.59              |
| A_68_P21516740 | chr2:109533518-109533562                          | NM_001048142:-179 | Bdnf       | PROMOTER               | 0.296                                           | 0.561                            | 933.08              | 523.23              | 0.166                            | 766.95              | 127.48              |
| A_68_P26127081 | chr8:106695023-106695067                          | NM_001141922:632  | Bean1      | INSIDE                 | 0.556                                           | 0.638                            | 1363.79             | 870.38              | 0.355                            | 1289.77             | 458.06              |
| A_68_P23767820 | chr5:67817841-67817885                            | NM_001164806:1176 | Bend4      | INSIDE                 | 0.074                                           | 2.214                            | 4749.84             | 10514.43            | 0.165                            | 2920.32             | 480.52              |
| A_68_P23767821 | chr5:67817925-67817969                            | NM_001164806:1092 | Bend4      | INSIDE                 | 0.054                                           | 2.300                            | 6069.92             | 13961.59            | 0.124                            | 3932.74             | 487.66              |
| A_68_P23210413 | chr4:111087417-111087472                          | NM_026279:-166    | Bend5      | PROMOTER               | 0.435                                           | 0.554                            | 1649.22             | 913.64              | 0.241                            | 1311.55             | 315.76              |
| A_68_P26023138 | chr8:87531521-87531565                            | NM_001130193:6688 | Best2      | INSIDE                 | 0.374                                           | 1.463                            | 1331.75             | 1947.71             | 0.547                            | 987.58              | 540.10              |
| A_68_P25585263 | chr7:148042305-148042349                          | NM_018742:-44     | Bet11      | DIVERGENT_PROMOTER     | 0.292                                           | 0.591                            | 2650.92             | 1565.37             | 0.172                            | 2027.12             | 349.16              |
| A_68_P21703962 | chr2:143688269-143688313                          | NM_009751:619     | Bfsp1      | INSIDE                 | 0.550                                           | 0.546                            | 3013.50             | 1646.23             | 0.301                            | 2402.58             | 722.05              |
| A_68_P32678565 | chrX:132420534-132420578                          | NM_001098222:167  | Bhlhb9     | INSIDE                 | 0.670                                           | 2.230                            | 1544.96             | 3445.00             | 1.494                            | 797.82              | 1192.24             |
| A_68_P24735111 | chr6:108610435-108610479                          | NM_011498:-166    | Bhlhe40    | PROMOTER               | 0.328                                           | 0.495                            | 1175.97             | 581.53              | 0.162                            | 957.28              | 155.05              |
| A_68_P24735177 | chr6:108618758-108618808                          | NM_011498:8160    | Bhlhe40    | DOWNSTREAM             | 0.111                                           | 1.624                            | 1047.87             | 1701.79             | 0.180                            | 808.09              | 145.76              |
| A_68_P24925475 | chr6:145812338-145812382                          | NM_024469:1500    | Bhlhe41    | INSIDE                 | 0.271                                           | 0.434                            | 1331.73             | 577.76              | 0.118                            | 1030.57             | 121.35              |
| A_68_P24800932 | chr6:120866913-120866957                          | NM_007544:-96     | Bid        | PROMOTER               | 0.329                                           | 0.520                            | 1901.47             | 988.02              | 0.171                            | 1443.08             | 246.66              |
| A_68_P30388922 | chr15:83357128-83357179                           | NM_007546:-138    | Bik        | PROMOTER               | 0.171                                           | 0.618                            | 1537.68             | 950.90              | 0.106                            | 1104.36             | 116.61              |
| A_68_P30388925 | chr15:83357441-83357485                           | NM_007546:171     | Bik        | INSIDE                 | 0.507                                           | 0.664                            | 1048.29             | 695.80              | 0.337                            | 851.32              | 286.62              |
| A_68_P30388929 | chr15:83357855-83357899                           | NM_007546:585     | Bik        | INSIDE                 | 0.277                                           | 0.586                            | 880.06              | 515.70              | 0.163                            | 715.98              | 116.36              |
| A_68_P26289572 | chr9:7837195-7837239                              | NM_007465:-1961   | Birc2      | PROMOTER               | 0.584                                           | 0.612                            | 1049.29             | 642.09              | 0.357                            | 770.67              | 275.28              |
| A_68_P31351851 | chr17:74927352-74927396                           | NM_007566:-260    | Birc6      | PROMOTER               | 0.278                                           | 0.526                            | 2662.66             | 1400.83             | 0.146                            | 2001.97             | 292.52              |
| A_68_P31351852 | chr17:74927433-74927479                           | NM_007566:-178    | Birc6      | PROMOTER               | 0.242                                           | 0.596                            | 962.59              | 573.43              | 0.144                            | 805.36              | 116.00              |
| A_68_P31351858 | chr17:74928310-74928354                           | NM_007566:698     | Birc6      | INSIDE                 | 0.158                                           | 0.503                            | 2795.33             | 1404.81             | 0.080                            | 2107.81             | 167.89              |
| A_68_P21777898 | chr2:157391806-157391850                          | NM_016916:269     | Bleap      | INSIDE                 | 0.525                                           | 0.533                            | 1132.85             | 603.97              | 0.280                            | 971.06              | 271.87              |
| A_68_P25267240 | chr7:87679859-87679903                            | NM_007550:4       | Blm        | INSIDE                 | 0.443                                           | 0.388                            | 2732.14             | 1061.30             | 0.172                            | 2245.55             | 386.81              |
| A_68_P32130738 | chr19:44220823-44220867                           | NM_028607:92      | Bloc1s2    | INSIDE                 | 0.584                                           | 0.550                            | 1274.72             | 701.66              | 0.322                            | 1090.56             | 350.70              |
| A_68_P21611440 | chr2:126896255-126896304                          | NM_026678:-113    | Blvra      | PROMOTER               | 0.490                                           | 0.663                            | 2615.34             | 1733.34             | 0.325                            | 2058.76             | 669.03              |
| A_68_P21564754 | chr2:118375138-118375182                          | NM_138313:254     | Bmf        | INSIDE                 | 0.517                                           | 0.639                            | 7210.45             | 4606.30             | 0.330                            | 5323.14             | 1756.68             |
| A_68_P21040880 | chr2:18610461-18610505                            | NM_007552:11838   | Bmi1       | DOWNSTREAM             | 0.589                                           | 0.633                            | 1224.93             | 775.07              | 0.373                            | 1105.97             | 412.53              |
| A_68_P21646218 | chr2:133378320-133378364                          | NM_007553:-592    | Bmp2       | PROMOTER               | 0.511                                           | 0.700                            | 1924.24             | 1346.76             | 0.357                            | 1606.86             | 574.39              |
| A_68_P21646220 | chr2:133378597-133378641                          | NM_007553:-316    | Bmp2       | PROMOTER               | 0.549                                           | 0.608                            | 1727.31             | 1050.49             | 0.334                            | 1473.87             | 491.72              |
| A_68_P29575951 | chr14:47006999-47007043                           | NM_007554:3254    | Bmp4       | INSIDE                 | 0.182                                           | 0.556                            | 2634.16             | 1465.46             | 0.101                            | 2039.64             | 206.07              |
| A_68_P29575956 | chr14:47007694-47007740                           | NM_007554:2558    | Bmp4       | INSIDE                 | 0.087                                           | 2.096                            | 1870.95             | 3921.78             | 0.183                            | 1256.59             | 230.24              |
| A_68_P29575957 | chr14:47007792-47007836                           | NM_007554:2460    | Bmp4       | INSIDE                 | 0.045                                           | 1.669                            | 5683.48             | 9482.93             | 0.075                            | 3733.09             | 279.16              |
| A_68_P29575959 | chr14:47007992-47008036                           | NM_007554:2260    | Bmp4       | INSIDE                 | 0.102                                           | 0.743                            | 2711.94             | 2014.71             | 0.076                            | 1957.06             | 148.65              |
| A_68_P29575961 | chr14:47008247-47008291                           | NM_007554:2006    | Bmp4       | INSIDE                 | 0.209                                           | 0.677                            | 1030.31             | 697.63              | 0.142                            | 852.97              | 120.73              |
| A_68_P28959945 | chr13:38437436-38437480                           | NM_007556:-126    | Bmp6       | PROMOTER               | 0.383                                           | 0.657                            | 1024.36             | 673.30              | 0.252                            | 703.83              | 177.12              |
| A_68_P28959953 | chr13:38438458-38438503                           | NM_007556:896     | Bmp6       | INSIDE                 | 0.281                                           | 0.617                            | 2412.64             | 1488.63             | 0.173                            | 1731.52             | 299.91              |
| A_68_P28959954 | chr13:38438568-38438612                           | NM_007556:1006    | Bmp6       | INSIDE                 | 0.455                                           | 0.672                            | 2248.38             | 1510.00             | 0.306                            | 1846.10             | 564.08              |
| A_68_P21866700 | chr2:172764763-172764807                          | NM_007557:1010    | Bmp7       | INSIDE                 | 0.067                                           | 0.581                            | 6091.26             | 3536.32             | 0.039                            | 4480.39             | 175.43              |
| A_68_P21866701 | chr2:172764888-172764932                          | NM_007557:884     | Bmp7       | INSIDE                 | 0.538                                           | 0.594                            | 2080.97             | 1235.60             | 0.319                            | 1501.23             | 479.30              |
| A_68_P21866704 | chr2:172765156-172765200                          | NM_007557:616     | Bmp7       | INSIDE                 | 0.251                                           | 0.617                            | 1113.69             | 687.29              | 0.155                            | 799.62              | 123.96              |
| A_68_P21866705 | chr2:172765232-172765276                          | NM_007557:540     | Bmp7       | INSIDE                 | 0.211                                           | 0.607                            | 1805.03             | 1094.84             | 0.128                            | 1376.69             | 175.80              |
| A_68_P23262156 | chr4:123019628-123019672                          | NM_007558:396     | Bmp8a      | INSIDE                 | 0.148                                           | 0.694                            | 2120.32             | 1471.63             | 0.103                            | 1521.93             | 156.18              |



| ProbeName      | Target position of probe on CpG island microarray | TargetID           | GeneSymbol | CpG island Description | Ratio of relative methylation (TiO2-NP/Vehicle) | Sham group                       |                     |                     | TiO <sub>2</sub> -H group        |                     |                     |
|----------------|---------------------------------------------------|--------------------|------------|------------------------|-------------------------------------------------|----------------------------------|---------------------|---------------------|----------------------------------|---------------------|---------------------|
|                |                                                   |                    |            |                        |                                                 | Relative methylation (Cy-5/Cy-3) | Cy-3 signal (Input) | Cy-5 signal (MeDIP) | Relative methylation (Cy-5/Cy-3) | Cy-3 signal (Input) | Cy-5 signal (MeDIP) |
| A_68_P23262162 | chr4:123020250-123020294                          | NM_007558:-226     | Bmp8a      | PROMOTER               | 0.607                                           | 0.528                            | 1218.13             | 642.86              | 0.321                            | 1020.81             | 327.24              |
| A_68_P23260768 | chr4:122782372-122782416                          | NM_007559:-13      | Bmp8b      | PROMOTER               | 0.594                                           | 0.539                            | 1363.52             | 735.06              | 0.320                            | 1135.02             | 363.35              |
| A_68_P26356121 | chr9:23026902-23026947                            | NM_028472:-595     | Bmper      | PROMOTER               | 0.369                                           | 1.643                            | 1952.36             | 3208.29             | 0.606                            | 1498.57             | 907.76              |
| A_68_P26356133 | chr9:23028290-23028334                            | NM_028472:793      | Bmper      | INSIDE                 | 0.501                                           | 0.718                            | 4984.49             | 3577.87             | 0.360                            | 3648.44             | 1311.63             |
| A_68_P29530302 | chr14:35315095-35315147                           | NM_009758:612      | Bmpr1a     | INSIDE                 | 0.482                                           | 0.599                            | 1221.79             | 731.81              | 0.289                            | 1077.15             | 310.83              |
| A_68_P29530310 | chr14:35316304-35316358                           | NM_009758:-598     | Bmpr1a     | PROMOTER               | 0.260                                           | 0.483                            | 1204.06             | 581.45              | 0.126                            | 927.24              | 116.61              |
| A_68_P20265713 | chr1:59820408-59820452                            | NM_007561:-1050    | Bmpr2      | PROMOTER               | 0.640                                           | 0.492                            | 1359.20             | 669.18              | 0.315                            | 1108.33             | 349.36              |
| A_68_P20265717 | chr1:59820840-59820884                            | NM_007561:-618     | Bmpr2      | PROMOTER               | 0.526                                           | 0.467                            | 1127.96             | 526.30              | 0.245                            | 983.90              | 241.53              |
| A_68_P21073893 | chr2:25562488-25562532                            | NM_023326:112      | Bmyc       | INSIDE                 | 0.291                                           | 0.518                            | 2191.14             | 1134.96             | 0.151                            | 1771.29             | 267.16              |
| A_68_P25275162 | chr7:89137615-89137659                            | NM_007562:-451     | Bnc1       | PROMOTER               | 0.492                                           | 0.655                            | 901.73              | 590.46              | 0.322                            | 598.73              | 192.80              |
| A_68_P23069990 | chr4:84322037-84322088                            | NM_172870:-1072    | Bnc2       | PROMOTER               | 0.377                                           | 0.582                            | 919.68              | 535.21              | 0.219                            | 725.51              | 159.22              |
| A_68_P31112417 | chr17:26918235-26918282                           | NM_172149:235      | Bnip1      | INSIDE                 | 0.226                                           | 0.574                            | 1232.99             | 707.88              | 0.130                            | 894.82              | 116.33              |
| A_68_P29682515 | chr14:67627653-67627697                           | NM_009761:40       | Bnip3l     | INSIDE                 | 0.354                                           | 0.494                            | 2395.59             | 1183.56             | 0.175                            | 1697.55             | 297.00              |
| A_68_P29682516 | chr14:67627743-67627787                           | NM_009761:-50      | Bnip3l     | PROMOTER               | 0.506                                           | 0.648                            | 1485.99             | 962.27              | 0.328                            | 1149.10             | 376.56              |
| A_68_P29682517 | chr14:67627899-67627944                           | NM_009761:-207     | Bnip3l     | PROMOTER               | 0.131                                           | 0.540                            | 2816.41             | 1521.44             | 0.071                            | 2123.86             | 150.15              |
| A_68_P27684135 | chr11:31572000-31572044                           | NM_001024919:-160  | Bod1       | PROMOTER               | 0.521                                           | 0.500                            | 1403.15             | 701.95              | 0.261                            | 1110.76             | 289.66              |
| A_68_P23637941 | chr5:42235067-42235111                            | NM_001081422:466   | Bod1l      | INSIDE                 | 0.608                                           | 0.500                            | 1234.59             | 617.58              | 0.304                            | 1086.26             | 330.62              |
| A_68_P20456912 | chr1:95582245-95582289                            | NM_016778:-4       | Bok        | PROMOTER               | 0.383                                           | 0.511                            | 1064.21             | 543.39              | 0.196                            | 812.05              | 158.91              |
| A_68_P22348132 | chr3:96001190-96001234                            | NM_026975:297      | Bola1      | INSIDE                 | 0.209                                           | 0.545                            | 1434.53             | 782.45              | 0.114                            | 1022.17             | 116.65              |
| A_68_P25501815 | chr7:133839681-133839725                          | NM_175103:189      | Bola2      | INSIDE                 | 0.601                                           | 0.393                            | 1973.25             | 775.55              | 0.236                            | 1391.41             | 328.75              |
| A_68_P28936242 | chr13:34129507-34129551                           | NM_026512:19       | Bphl       | INSIDE                 | 0.649                                           | 0.542                            | 1096.78             | 594.95              | 0.352                            | 982.49              | 345.68              |
| A_68_P28104944 | chr11:106911768-106911812                         | NM_176850:81446    | Bptf       | INSIDE                 | 0.554                                           | 2.532                            | 46344.44            | 117337.80           | 1.402                            | 36795.29            | 51603.19            |
| A_68_P31152204 | chr17:34255264-34255308                           | NR_037970:1559     | Brd2       | INSIDE                 | 0.185                                           | 1.665                            | 5401.10             | 8995.19             | 0.308                            | 3536.85             | 1090.15             |
| A_68_P31152205 | chr17:34255338-34255382                           | NR_037970:1485     | Brd2       | INSIDE                 | 0.653                                           | 0.581                            | 1894.32             | 1101.27             | 0.380                            | 1315.29             | 499.50              |
| A_68_P31152216 | chr17:34256835-34256882                           | NR_037970:-13      | Brd2       | PROMOTER               | 0.297                                           | 0.664                            | 1305.39             | 866.95              | 0.197                            | 878.61              | 173.17              |
| A_68_P31152219 | chr17:34257154-34257198                           | NR_037970:-331     | Brd2       | PROMOTER               | 0.242                                           | 0.558                            | 2029.96             | 1132.29             | 0.135                            | 1410.13             | 190.53              |
| A_68_P31152223 | chr17:34257573-34257617                           | NR_037970:-749     | Brd2       | PROMOTER               | 0.479                                           | 0.648                            | 2483.84             | 1609.22             | 0.310                            | 1780.17             | 552.63              |
| A_68_P31152225 | chr17:34257765-34257809                           | NR_037970:-941     | Brd2       | PROMOTER               | 0.283                                           | 0.657                            | 5608.29             | 3685.58             | 0.186                            | 3785.75             | 703.50              |
| A_68_P27987612 | chr11:86014370-86014414                           | NM_178309:303      | Brip1      | INSIDE                 | 0.582                                           | 0.442                            | 1329.23             | 586.89              | 0.257                            | 1017.15             | 261.40              |
| A_68_P27987613 | chr11:86014523-86014567                           | NM_178309:151      | Brip1      | INSIDE                 | 0.377                                           | 0.519                            | 1442.15             | 748.02              | 0.195                            | 1105.35             | 215.97              |
| A_68_P27987617 | chr11:86015036-86015080                           | NM_178309:-363     | Brip1      | PROMOTER               | 0.238                                           | 0.550                            | 2619.06             | 1439.79             | 0.131                            | 2060.48             | 270.07              |
| A_68_P30010833 | chr15:10415572-10415616                           | NM_026396:98       | Brix1      | INSIDE                 | 0.166                                           | 0.685                            | 1910.79             | 1308.77             | 0.113                            | 1330.06             | 150.94              |
| A_68_P28453879 | chr12:56937597-56937641                           | NM_001037756:266   | Brms1l     | INSIDE                 | 0.292                                           | 0.517                            | 3907.17             | 2021.34             | 0.151                            | 2900.31             | 438.81              |
| A_68_P28454005 | chr12:56962212-56962256                           | NM_001037756:24882 | Brms1l     | INSIDE                 | 0.587                                           | 2.506                            | 3126.73             | 7837.02             | 1.472                            | 2390.91             | 3518.38             |
| A_68_P20794610 | chr1:167391699-167391743                          | NM_027430:382      | Brp44      | INSIDE                 | 0.172                                           | 0.544                            | 1884.09             | 1025.75             | 0.093                            | 1323.72             | 123.61              |
| A_68_P32957266 | chr17:8477443-8477487                             | NM_018819:787      | Brp44l     | INSIDE                 | 0.562                                           | 0.540                            | 2045.56             | 1104.06             | 0.304                            | 1646.50             | 499.84              |
| A_68_P32957267 | chr17:8477533-8477577                             | NM_018819:877      | Brp44l     | INSIDE                 | 0.366                                           | 0.430                            | 2294.45             | 985.74              | 0.157                            | 1874.90             | 295.18              |
| A_68_P32592614 | chrX:106029534-106029578                          | NM_001081477:138   | Brwd3      | INSIDE                 | 0.275                                           | 2.326                            | 4733.30             | 11008.85            | 0.639                            | 1847.91             | 1180.65             |
| A_68_P32592615 | chrX:106029602-106029650                          | NM_001081477:68    | Brwd3      | INSIDE                 | 0.052                                           | 2.627                            | 2774.50             | 7287.86             | 0.137                            | 861.55              | 117.82              |
| A_68_P23296722 | chr4:129138895-129138941                          | NM_133889:-4       | Bsdcl1     | PROMOTER               | 0.104                                           | 2.164                            | 3236.95             | 7003.60             | 0.224                            | 2243.55             | 503.07              |
| A_68_P23296723 | chr4:129138984-129139028                          | NM_133889:84       | Bsdcl1     | INSIDE                 | 0.217                                           | 1.938                            | 4850.53             | 9399.00             | 0.420                            | 3306.54             | 1388.52             |
| A_68_P23296726 | chr4:129139208-129139252                          | NM_133889:308      | Bsdcl1     | INSIDE                 | 0.281                                           | 0.461                            | 1182.13             | 545.33              | 0.130                            | 890.14              | 115.58              |
| A_68_P27278359 | chr10:79167367-79167411                           | NM_001077184:286   | Bsg        | INSIDE                 | 0.212                                           | 0.438                            | 1665.67             | 728.83              | 0.093                            | 1262.70             | 117.39              |
| A_68_P26445764 | chr9:40684336-40684380                            | NM_178245:2149     | Bsx        | INSIDE                 | 0.405                                           | 0.423                            | 1901.12             | 803.37              | 0.171                            | 1525.03             | 260.78              |

| ProbeName      | Target position of probe on CpG island microarray | TargetID            | GeneSymbol    | CpG island Description | Ratio of relative methylation (TiO2-NP/Vehicle) | Sham group                       |                     |                     | TiO <sub>2</sub> -H group        |                     |                     |
|----------------|---------------------------------------------------|---------------------|---------------|------------------------|-------------------------------------------------|----------------------------------|---------------------|---------------------|----------------------------------|---------------------|---------------------|
|                |                                                   |                     |               |                        |                                                 | Relative methylation (Cy-5/Cy-3) | Cy-3 signal (Input) | Cy-5 signal (MeDIP) | Relative methylation (Cy-5/Cy-3) | Cy-3 signal (Input) | Cy-5 signal (MeDIP) |
| A_68_P27308091 | chr10:84849925-84849970                           | NM_028709:389       | Btbd11        | INSIDE                 | 0.227                                           | 0.598                            | 1118.31             | 668.60              | 0.136                            | 904.39              | 122.55              |
| A_68_P27308092 | chr10:84850082-84850126                           | NM_028709:546       | Btbd11        | INSIDE                 | 0.086                                           | 0.453                            | 4449.39             | 2016.92             | 0.039                            | 3007.86             | 117.16              |
| A_68_P27308093 | chr10:84850152-84850196                           | NM_028709:616       | Btbd11        | INSIDE                 | 0.154                                           | 0.453                            | 3317.82             | 1504.20             | 0.070                            | 2310.99             | 160.95              |
| A_68_P27308102 | chr10:84851199-84851243                           | NM_028709:1662      | Btbd11        | INSIDE                 | 0.124                                           | 0.604                            | 2262.41             | 1366.82             | 0.075                            | 1635.23             | 122.97              |
| A_68_P27309451 | chr10:85061404-85061448                           | NM_001017525:271    | Btbd11        | INSIDE                 | 0.514                                           | 0.434                            | 2082.85             | 903.63              | 0.223                            | 1569.36             | 349.73              |
| A_68_P28149796 | chr11:114653639-114653683                         | NM_028055:3546      | Btbd17        | INSIDE                 | 0.539                                           | 0.605                            | 1012.98             | 612.71              | 0.326                            | 895.07              | 292.07              |
| A_68_P21673353 | chr2:138082625-138082669                          | NM_001025431:327    | Btbd3         | INSIDE                 | 0.347                                           | 0.439                            | 2287.72             | 1004.93             | 0.152                            | 1958.63             | 298.59              |
| A_68_P21673355 | chr2:138082825-138082869                          | NM_001025431:527    | Btbd3         | INSIDE                 | 0.427                                           | 0.424                            | 1382.18             | 586.22              | 0.181                            | 991.91              | 179.61              |
| A_68_P31134865 | chr17:30712521-30712565                           | NM_027060:690       | Btbd9         | INSIDE                 | 0.195                                           | 0.574                            | 1343.54             | 770.52              | 0.112                            | 1059.10             | 118.55              |
| A_68_P29513184 | chr14:32454218-32454262                           | NM_025295:-2        | Btd           | DIVERGENT_PROMOTER     | 0.374                                           | 0.584                            | 1018.95             | 595.25              | 0.219                            | 797.44              | 174.38              |
| A_68_P27371449 | chr10:96079420-96079468                           | NM_007569:-190      | Btg1          | PROMOTER               | 0.149                                           | 1.915                            | 3073.84             | 5887.06             | 0.286                            | 2093.55             | 598.18              |
| A_68_P20631265 | chr1:135975492-135975536                          | NM_007570:218       | Btg2          | INSIDE                 | 0.223                                           | 0.494                            | 1402.73             | 693.60              | 0.110                            | 1049.13             | 115.80              |
| A_68_P20631266 | chr1:135975629-135975675                          | NM_007570:80        | Btg2          | INSIDE                 | 0.572                                           | 0.519                            | 1236.30             | 641.90              | 0.297                            | 944.69              | 280.50              |
| A_68_P32139026 | chr19:45616482-45616535                           | NM_001037758:178285 | Btrc          | DOWNSTREAM             | 0.214                                           | 0.665                            | 1005.56             | 668.88              | 0.142                            | 866.88              | 123.16              |
| A_68_P21615856 | chr2:127657274-127657318                          | NM_001113179:299    | Bub1          | INSIDE                 | 0.230                                           | 0.398                            | 1552.78             | 617.92              | 0.091                            | 1339.09             | 122.33              |
| A_68_P21615857 | chr2:127657373-127657417                          | NM_001113179:201    | Bub1          | INSIDE                 | 0.536                                           | 0.610                            | 1653.90             | 1008.38             | 0.327                            | 1335.81             | 436.17              |
| A_68_P21615858 | chr2:127657441-127657493                          | NM_001113179:129    | Bub1          | INSIDE                 | 0.202                                           | 0.694                            | 1119.43             | 776.42              | 0.140                            | 852.83              | 119.77              |
| A_68_P21564939 | chr2:118424101-118424145                          | NM_009773:176       | Bub1b         | INSIDE                 | 0.187                                           | 2.521                            | 1635.60             | 4123.18             | 0.471                            | 1037.77             | 488.62              |
| A_68_P31213160 | chr17:47747908-47747952                           | NM_016859:511       | Bysl          | INSIDE                 | 0.228                                           | 0.669                            | 1659.15             | 1110.35             | 0.153                            | 1158.95             | 177.21              |
| A_68_P20258660 | chr1:58449893-58449937                            | NM_025824:-65       | Bzw1          | PROMOTER               | 0.402                                           | 0.379                            | 2338.44             | 886.59              | 0.152                            | 1931.23             | 294.39              |
| A_68_P20258664 | chr1:58450590-58450634                            | NM_025824:633       | Bzw1          | INSIDE                 | 0.392                                           | 0.644                            | 1254.18             | 807.72              | 0.252                            | 1054.82             | 266.06              |
| A_68_P28356775 | chr12:36883341-36883387                           | NM_025840:48        | Bzw2          | INSIDE                 | 0.301                                           | 1.635                            | 1872.76             | 3062.06             | 0.492                            | 1394.80             | 686.87              |
| A_68_P32040830 | chr19:27504703-27504752                           | NR_027987:201       | C030016D13Rik | INSIDE                 | 0.135                                           | 0.698                            | 1691.61             | 1180.67             | 0.094                            | 1241.33             | 116.78              |
| A_68_P31323854 | chr17:69766606-69766650                           | NR_026848:842       | C030034I22Rik | INSIDE                 | 0.191                                           | 0.471                            | 1746.19             | 823.00              | 0.090                            | 1292.38             | 116.56              |
| A_68_P31323858 | chr17:69767042-69767093                           | NR_026848:1281      | C030034I22Rik | INSIDE                 | 0.191                                           | 0.684                            | 1127.06             | 770.71              | 0.131                            | 921.76              | 120.68              |
| A_68_P31323859 | chr17:69767217-69767270                           | NR_026848:1457      | C030034I22Rik | INSIDE                 | 0.271                                           | 0.588                            | 1073.03             | 630.54              | 0.159                            | 817.56              | 130.24              |
| A_68_P24641803 | chr6:91827853-91827908                            | NM_172730:-166      | C130022K22Rik | PROMOTER               | 0.254                                           | 0.523                            | 1199.69             | 627.78              | 0.133                            | 911.33              | 120.90              |
| A_68_P24641805 | chr6:91828146-91828192                            | NM_172730:122       | C130022K22Rik | INSIDE                 | 0.216                                           | 0.569                            | 1374.82             | 781.83              | 0.123                            | 998.05              | 122.84              |
| A_68_P20411732 | chr1:88256159-88256203                            | NR_015507:32        | C130036L24Rik | INSIDE                 | 0.531                                           | 0.584                            | 2833.67             | 1653.54             | 0.310                            | 2282.19             | 706.71              |
| A_68_P28596925 | chr12:85533705-85533749                           | NM_001163502:1239   | C130039O16Rik | INSIDE                 | 0.192                                           | 0.530                            | 1437.34             | 761.46              | 0.102                            | 1168.46             | 118.93              |
| A_68_P28596936 | chr12:85534975-85535019                           | NM_001163502:-31    | C130039O16Rik | PROMOTER               | 0.588                                           | 0.587                            | 1200.40             | 704.15              | 0.345                            | 1073.45             | 370.30              |
| A_68_P24511775 | chr6:65331286-65331330                            | NM_175524:21        | C130060K24Rik | INSIDE                 | 0.147                                           | 0.530                            | 2081.02             | 1102.85             | 0.078                            | 1554.64             | 120.73              |
| A_68_P20898010 | chr1:186706559-186706603                          | NM_178692:335       | C130074G19Rik | INSIDE                 | 0.215                                           | 0.629                            | 1120.27             | 705.20              | 0.135                            | 946.14              | 128.04              |
| A_68_P27903680 | chr11:70796542-70796586                           | NM_007573:-36       | C1qbp         | PROMOTER               | 0.393                                           | 0.533                            | 1532.93             | 816.29              | 0.209                            | 1280.18             | 267.89              |
| A_68_P20561487 | chr1:122239035-122239079                          | NM_207233:1898      | C1ql2         | INSIDE                 | 0.332                                           | 0.481                            | 1353.72             | 650.98              | 0.160                            | 984.99              | 157.15              |
| A_68_P20561488 | chr1:122239104-122239151                          | NM_207233:1969      | C1ql2         | INSIDE                 | 0.148                                           | 0.537                            | 2023.78             | 1086.08             | 0.080                            | 1559.66             | 124.08              |
| A_68_P21013689 | chr2:12931615-12931659                            | NM_153155:855       | C1ql3         | INSIDE                 | 0.647                                           | 0.672                            | 974.19              | 655.09              | 0.435                            | 849.89              | 369.68              |
| A_68_P21419446 | chr2:90725823-90725867                            | NM_026161:-98       | C1qnf4        | PROMOTER               | 0.304                                           | 0.498                            | 1106.38             | 550.81              | 0.152                            | 853.07              | 129.25              |
| A_68_P23351276 | chr4:138908601-138908645                          | NM_001039200:115    | C230096C10Rik | INSIDE                 | 0.608                                           | 0.625                            | 1153.69             | 720.54              | 0.380                            | 790.46              | 300.24              |
| A_68_P31001857 | chr16:98143725-98143769                           | NM_174847:497       | C2cd2         | INSIDE                 | 0.383                                           | 0.689                            | 1211.64             | 834.54              | 0.264                            | 935.34              | 246.86              |
| A_68_P26466977 | chr9:44127873-44127917                            | NM_027909:471       | C2cd2l        | INSIDE                 | 0.570                                           | 0.627                            | 3836.44             | 2404.59             | 0.357                            | 2957.77             | 1055.85             |
| A_68_P26600871 | chr9:67607518-67607562                            | NM_001081314:297    | C2cd4b        | INSIDE                 | 0.345                                           | 0.513                            | 2348.85             | 1204.41             | 0.177                            | 1940.66             | 343.40              |
| A_68_P27277825 | chr10:79076430-79076474                           | NM_198614:311       | C2cd4c        | INSIDE                 | 0.564                                           | 0.342                            | 2022.44             | 691.42              | 0.193                            | 1722.39             | 331.93              |
| A_68_P22338542 | chr3:94168357-94168405                            | NM_001136117:2015   | C2cd4d        | INSIDE                 | 0.257                                           | 0.585                            | 989.64              | 579.24              | 0.150                            | 779.66              | 117.12              |

| ProbeName      | Target position of probe on CpG island microarray | TargetID            | GeneSymbol    | CpG island Description | Ratio of relative methylation (TiO2-NP/Vehicle) | Sham group                       |                     |                     | TiO <sub>2</sub> -H group        |                     |                     |
|----------------|---------------------------------------------------|---------------------|---------------|------------------------|-------------------------------------------------|----------------------------------|---------------------|---------------------|----------------------------------|---------------------|---------------------|
|                |                                                   |                     |               |                        |                                                 | Relative methylation (Cy-5/Cy-3) | Cy-3 signal (Input) | Cy-5 signal (MeDIP) | Relative methylation (Cy-5/Cy-3) | Cy-3 signal (Input) | Cy-5 signal (MeDIP) |
| A_68_P25022917 | chr7:29415899-29415943                            | NM_175319:114       | C330005M16Rik | INSIDE                 | 0.437                                           | 0.520                            | 1440.02             | 748.27              | 0.227                            | 1222.21             | 277.84              |
| A_68_P22733181 | chr4:12016440-12016484                            | NM_198957:-54       | C430048L16Rik | DIVERGENT_PROMOTER     | 0.133                                           | 0.608                            | 3136.35             | 1906.29             | 0.081                            | 2171.18             | 176.00              |
| A_68_P32385503 | chrX:50410575-50410619                            | NR_038184:-229      | C430049B03Rik | PROMOTER               | 0.187                                           | 2.036                            | 3303.44             | 6726.82             | 0.380                            | 1329.00             | 505.02              |
| A_68_P23230003 | chr4:116269931-116269975                          | NR_029450:283       | C530005A16Rik | INSIDE                 | 0.439                                           | 0.628                            | 1343.00             | 843.05              | 0.276                            | 1099.52             | 303.25              |
| A_68_P23818502 | chr5:77286666-77286710                            | NM_001163793:17065  | C530008M17Rik | INSIDE                 | 0.281                                           | 1.592                            | 1314.50             | 2092.35             | 0.447                            | 973.85              | 434.84              |
| A_68_P23818507 | chr5:77287352-77287398                            | NM_001163793:17751  | C530008M17Rik | INSIDE                 | 0.586                                           | 2.378                            | 1867.71             | 4441.86             | 1.394                            | 1621.02             | 2258.91             |
| A_68_P24818072 | chr6:124946958-124947002                          | NM_001145927:-1474  | C530028O21Rik | PROMOTER               | 0.215                                           | 0.679                            | 5799.59             | 3935.88             | 0.146                            | 4114.28             | 599.34              |
| A_68_P24818074 | chr6:124947113-124947157                          | NM_001145927:-1320  | C530028O21Rik | PROMOTER               | 0.096                                           | 0.584                            | 3975.60             | 2320.86             | 0.056                            | 2612.11             | 145.96              |
| A_68_P28153130 | chr11:115235797-115235841                         | NM_175454:-6785     | C630004H02Rik | DIVERGENT_PROMOTER     | 0.268                                           | 0.693                            | 1465.38             | 1015.15             | 0.185                            | 1237.82             | 229.54              |
| A_68_P23295722 | chr4:128916103-128916147                          | NM_001033189:9563   | C77080        | INSIDE                 | 0.265                                           | 0.521                            | 2413.50             | 1257.67             | 0.138                            | 1941.47             | 268.53              |
| A_68_P23295723 | chr4:128916179-128916223                          | NM_001033189:9487   | C77080        | INSIDE                 | 0.524                                           | 0.532                            | 3414.15             | 1816.75             | 0.279                            | 2652.26             | 739.66              |
| A_68_P20408509 | chr1:87690854-87690908                            | NM_133781:859       | Cab39         | INSIDE                 | 0.249                                           | 0.498                            | 1087.17             | 541.31              | 0.124                            | 936.15              | 116.20              |
| A_68_P20408511 | chr1:87691108-87691154                            | NM_133781:1109      | Cab39         | INSIDE                 | 0.172                                           | 0.546                            | 1562.43             | 852.44              | 0.094                            | 1248.16             | 117.17              |
| A_68_P31497267 | chr18:11997722-11997766                           | NM_001146287:-38    | Cables1       | PROMOTER               | 0.553                                           | 0.486                            | 1665.49             | 808.73              | 0.268                            | 1224.89             | 328.79              |
| A_68_P24008375 | chr5:115644484-115644528                          | NM_013879:-8376     | Cabp1         | PROMOTER               | 0.650                                           | 0.403                            | 1287.34             | 519.41              | 0.262                            | 1078.13             | 282.69              |
| A_68_P27559363 | chr11:4645990-4646034                             | NM_138948:769       | Cabp7         | INSIDE                 | 0.270                                           | 0.621                            | 1321.68             | 821.29              | 0.168                            | 1083.20             | 182.06              |
| A_68_P23151263 | chr4:100450587-100450631                          | NM_198037:1325      | Cachd1        | INSIDE                 | 0.237                                           | 0.653                            | 1046.97             | 683.68              | 0.155                            | 777.29              | 120.27              |
| A_68_P21067988 | chr2:24617711-24617766                            | NM_001042528:829    | Caena1b       | INSIDE                 | 0.245                                           | 0.592                            | 1501.68             | 889.57              | 0.145                            | 1151.69             | 166.89              |
| A_68_P24791281 | chr6:119057478-119057522                          | NM_001159533:707    | Caena1c       | INSIDE                 | 0.488                                           | 0.454                            | 2298.28             | 1042.53             | 0.221                            | 1910.78             | 423.18              |
| A_68_P28033137 | chr11:94334569-94334613                           | NM_001112813:922    | Caena1g       | INSIDE                 | 0.370                                           | 0.334                            | 2173.74             | 726.93              | 0.124                            | 1681.55             | 207.80              |
| A_68_P30371303 | chr15:80118250-80118294                           | NM_001044308:605    | Caena1i       | INSIDE                 | 0.520                                           | 0.557                            | 1719.51             | 957.94              | 0.290                            | 1356.02             | 392.85              |
| A_68_P30371307 | chr15:80118683-80118727                           | NM_001044308:1037   | Caena1i       | INSIDE                 | 0.586                                           | 0.546                            | 1468.48             | 801.33              | 0.320                            | 1132.34             | 362.15              |
| A_68_P30371905 | chr15:80202995-80203040                           | NM_001044308:85350  | Caena1i       | INSIDE                 | 0.619                                           | 6.483                            | 113.92              | 738.50              | 4.011                            | 142.16              | 570.23              |
| A_68_P26808313 | chr9:107301962-107302006                          | NM_001174047:-226   | Caena2d2      | PROMOTER               | 0.189                                           | 0.654                            | 1831.03             | 1197.03             | 0.124                            | 1408.19             | 174.06              |
| A_68_P26809310 | chr9:107429107-107429155                          | NM_001174047:126920 | Caena2d2      | INSIDE                 | 0.226                                           | 0.430                            | 1548.14             | 665.56              | 0.097                            | 1204.64             | 117.14              |
| A_68_P28053985 | chr11:97883420-97883464                           | NM_001159320:-3756  | Caenb1        | PROMOTER               | 0.403                                           | 0.437                            | 1225.57             | 535.50              | 0.176                            | 1003.72             | 176.92              |
| A_68_P28053991 | chr11:97884084-97884128                           | NM_145121:-165      | Caenb1        | DIVERGENT_PROMOTER     | 0.582                                           | 0.583                            | 1340.27             | 781.35              | 0.339                            | 1030.71             | 349.81              |
| A_68_P21221048 | chr2:52531254-52531298                            | NM_001037099:825    | Caenb4        | INSIDE                 | 0.292                                           | 0.484                            | 1120.73             | 542.76              | 0.141                            | 907.44              | 128.19              |
| A_68_P21221053 | chr2:52531826-52531870                            | NM_001037099:253    | Caenb4        | INSIDE                 | 0.611                                           | 0.486                            | 1392.83             | 676.68              | 0.297                            | 1086.75             | 322.45              |
| A_68_P28109099 | chr11:107655337-107655381                         | NM_019431:420       | Caeng4        | INSIDE                 | 0.318                                           | 0.648                            | 1051.32             | 681.39              | 0.206                            | 825.45              | 170.02              |
| A_68_P28109102 | chr11:107655644-107655688                         | NM_019431:112       | Caeng4        | INSIDE                 | 0.484                                           | 0.556                            | 1788.57             | 994.28              | 0.269                            | 1320.97             | 355.36              |
| A_68_P33016567 | chr7:3424267-3424311                              | NM_133183:-1134     | Caeng6        | PROMOTER               | 0.460                                           | 0.707                            | 1435.58             | 1015.24             | 0.325                            | 1202.52             | 391.28              |
| A_68_P33005171 | chr7:3366221-3366265                              | NM_133189:29558     | Caeng7        | INSIDE                 | 0.241                                           | 0.708                            | 1610.43             | 1139.90             | 0.170                            | 1209.08             | 205.95              |
| A_68_P23576171 | chr5:31357229-31357273                            | NM_023525:67        | Cad           | INSIDE                 | 0.336                                           | 0.693                            | 1630.74             | 1130.54             | 0.233                            | 1334.36             | 310.43              |
| A_68_P26486118 | chr9:47338069-47338113                            | NM_001025600:-344   | Cadm1         | PROMOTER               | 0.530                                           | 0.478                            | 1112.89             | 532.05              | 0.253                            | 837.34              | 212.03              |
| A_68_P26486122 | chr9:47338579-47338623                            | NM_001025600:166    | Cadm1         | INSIDE                 | 0.500                                           | 0.506                            | 1109.75             | 561.40              | 0.253                            | 835.76              | 211.30              |
| A_68_P26486124 | chr9:47338813-47338857                            | NM_001025600:400    | Cadm1         | INSIDE                 | 0.593                                           | 0.689                            | 1720.45             | 1185.19             | 0.409                            | 1558.50             | 637.17              |
| A_68_P26486125 | chr9:47338950-47338994                            | NM_001025600:538    | Cadm1         | INSIDE                 | 0.197                                           | 0.484                            | 2492.18             | 1207.29             | 0.096                            | 2010.82             | 192.05              |
| A_68_P30836891 | chr16:67620592-67620636                           | NM_001145977:539    | Cadm2         | INSIDE                 | 0.655                                           | 0.618                            | 1691.84             | 1046.08             | 0.405                            | 1262.79             | 511.09              |
| A_68_P30836892 | chr16:67620668-67620712                           | NM_001145977:463    | Cadm2         | INSIDE                 | 0.166                                           | 1.518                            | 991.00              | 1504.13             | 0.251                            | 720.76              | 181.25              |
| A_68_P30836893 | chr16:67620755-67620799                           | NM_001145977:377    | Cadm2         | INSIDE                 | 0.281                                           | 0.666                            | 1005.38             | 669.65              | 0.187                            | 645.82              | 120.96              |
| A_68_P20837649 | chr1:175297409-175297453                          | NM_053199:396       | Cadm3         | INSIDE                 | 0.346                                           | 0.488                            | 2611.70             | 1273.63             | 0.169                            | 1819.80             | 306.71              |
| A_68_P20837653 | chr1:175297800-175297844                          | NM_053199:4         | Cadm3         | INSIDE                 | 0.235                                           | 0.486                            | 3872.79             | 1882.95             | 0.114                            | 2816.07             | 322.23              |
| A_68_P29413818 | chr14:13655644-13655688                           | NM_001042617:-73    | Cadps         | PROMOTER               | 0.171                                           | 0.411                            | 2506.75             | 1031.03             | 0.070                            | 2001.49             | 140.55              |

| ProbeName      | Target position of probe on CpG island microarray | TargetID            | GeneSymbol | CpG island Description | Ratio of relative methylation (TiO2-NP/Vehicle) | Sham group                       |                     |                     | TiO <sub>2</sub> -H group        |                     |                     |
|----------------|---------------------------------------------------|---------------------|------------|------------------------|-------------------------------------------------|----------------------------------|---------------------|---------------------|----------------------------------|---------------------|---------------------|
|                |                                                   |                     |            |                        |                                                 | Relative methylation (Cy-5/Cy-3) | Cy-3 signal (Input) | Cy-5 signal (MeDIP) | Relative methylation (Cy-5/Cy-3) | Cy-3 signal (Input) | Cy-5 signal (MeDIP) |
| A_68_P28680556 | chr12:101437490-101437534                         | NM_009790:-238      | Calm1      | PROMOTER               | 0.361                                           | 0.354                            | 2330.47             | 824.17              | 0.128                            | 1909.05             | 243.64              |
| A_68_P28680559 | chr12:101437798-101437842                         | NM_009790:70        | Calm1      | INSIDE                 | 0.545                                           | 0.438                            | 1423.84             | 623.99              | 0.239                            | 1086.39             | 259.37              |
| A_68_P31423374 | chr17:87846116-87846160                           | NM_007589:137       | Calm2      | INSIDE                 | 0.259                                           | 0.559                            | 3168.11             | 1772.10             | 0.145                            | 2303.86             | 333.19              |
| A_68_P24093836 | chr5:130925066-130925110                          | NM_021371:427       | Caln1      | INSIDE                 | 0.276                                           | 0.422                            | 1512.80             | 638.21              | 0.117                            | 1137.34             | 132.63              |
| A_68_P22503486 | chr3:126300384-126300428                          | NM_001025438:516    | Camk2d     | INSIDE                 | 0.116                                           | 0.600                            | 2437.09             | 1463.02             | 0.070                            | 1683.84             | 117.34              |
| A_68_P22503487 | chr3:126300546-126300590                          | NM_001025438:678    | Camk2d     | INSIDE                 | 0.391                                           | 0.431                            | 2047.11             | 883.00              | 0.169                            | 1532.12             | 258.42              |
| A_68_P29449128 | chr14:21612623-21612667                           | NM_001039138:666    | Camk2g     | INSIDE                 | 0.641                                           | 0.738                            | 3410.83             | 2517.97             | 0.473                            | 2557.73             | 1209.41             |
| A_68_P29449134 | chr14:21613118-21613162                           | NM_001039138:170    | Camk2g     | INSIDE                 | 0.529                                           | 0.294                            | 1853.08             | 544.01              | 0.155                            | 1427.08             | 221.52              |
| A_68_P23345839 | chr4:138009933-138009977                          | NM_025451:-1108     | Camk2n1    | PROMOTER               | 0.230                                           | 0.499                            | 1350.39             | 673.19              | 0.114                            | 1018.54             | 116.58              |
| A_68_P23345849 | chr4:138011542-138011586                          | NM_025451:502       | Camk2n1    | INSIDE                 | 0.625                                           | 0.631                            | 1900.64             | 1199.08             | 0.394                            | 1338.71             | 528.10              |
| A_68_P30588523 | chr16:20619843-20619887                           | NM_028420:1487      | Camk2n2    | INSIDE                 | 0.491                                           | 1.360                            | 5028.18             | 6836.13             | 0.667                            | 3604.50             | 2405.53             |
| A_68_P30588528 | chr16:20620501-20620545                           | NM_028420:829       | Camk2n2    | INSIDE                 | 0.212                                           | 2.275                            | 5785.35             | 13159.28            | 0.483                            | 3595.98             | 1735.95             |
| A_68_P30588530 | chr16:20620757-20620801                           | NM_028420:573       | Camk2n2    | INSIDE                 | 0.435                                           | 0.471                            | 2118.12             | 998.07              | 0.205                            | 1663.51             | 341.23              |
| A_68_P30588535 | chr16:20621603-20621647                           | NM_028420:-273      | Camk2n2    | DIVERGENT_PROMOTER     | 0.667                                           | 0.443                            | 1624.09             | 719.47              | 0.295                            | 1327.82             | 392.09              |
| A_68_P30588537 | chr16:20621774-20621818                           | NM_028420:-445      | Camk2n2    | DIVERGENT_PROMOTER     | 0.368                                           | 0.486                            | 2447.06             | 1190.31             | 0.179                            | 1934.82             | 346.13              |
| A_68_P30588538 | chr16:20621896-20621940                           | NM_028420:-567      | Camk2n2    | DIVERGENT_PROMOTER     | 0.229                                           | 0.430                            | 2415.28             | 1037.65             | 0.099                            | 1723.21             | 169.85              |
| A_68_P30588539 | chr16:20621997-20622043                           | NM_028420:-669      | Camk2n2    | DIVERGENT_PROMOTER     | 0.257                                           | 0.384                            | 1628.91             | 626.14              | 0.099                            | 1210.12             | 119.78              |
| A_68_P30588540 | chr16:20622060-20622119                           | NM_028420:-738      | Camk2n2    | DIVERGENT_PROMOTER     | 0.232                                           | 0.667                            | 992.97              | 662.42              | 0.155                            | 753.11              | 116.79              |
| A_68_P30588542 | chr16:20622241-20622285                           | NM_028420:-911      | Camk2n2    | DIVERGENT_PROMOTER     | 0.237                                           | 0.583                            | 1427.54             | 831.71              | 0.138                            | 1042.94             | 143.75              |
| A_68_P30588544 | chr16:20622405-20622449                           | NM_028420:-1075     | Camk2n2    | DIVERGENT_PROMOTER     | 0.170                                           | 0.624                            | 1347.74             | 840.42              | 0.106                            | 1107.61             | 117.49              |
| A_68_P26811951 | chr9:107838581-107838626                          | NM_145621:353       | Camkv      | INSIDE                 | 0.297                                           | 0.469                            | 1168.01             | 548.13              | 0.139                            | 860.37              | 119.89              |
| A_68_P21075525 | chr2:25837701-25837745                            | NM_001115076:1080   | Camsap1    | INSIDE                 | 0.210                                           | 0.619                            | 5224.55             | 3234.22             | 0.130                            | 3672.23             | 476.80              |
| A_68_P21075526 | chr2:25837853-25837902                            | NM_001115076:925    | Camsap1    | INSIDE                 | 0.432                                           | 0.652                            | 1123.64             | 733.04              | 0.282                            | 904.28              | 254.82              |
| A_68_P21075527 | chr2:25838017-25838061                            | NM_001115076:764    | Camsap1    | INSIDE                 | 0.162                                           | 0.734                            | 3121.54             | 2289.68             | 0.119                            | 2110.39             | 250.73              |
| A_68_P21075528 | chr2:25838113-25838157                            | NM_001115076:668    | Camsap1    | INSIDE                 | 0.491                                           | 0.707                            | 3109.82             | 2199.19             | 0.347                            | 2264.66             | 786.34              |
| A_68_P23410164 | chr4:150482143-150482187                          | NM_001081557:753713 | Camta1     | INSIDE                 | 0.347                                           | 0.648                            | 3995.98             | 2590.53             | 0.225                            | 2728.26             | 614.28              |
| A_68_P23410166 | chr4:150482290-150482334                          | NM_001081557:753565 | Camta1     | INSIDE                 | 0.240                                           | 0.480                            | 6637.68             | 3189.30             | 0.115                            | 4849.80             | 559.19              |
| A_68_P23410311 | chr4:150503055-150503099                          | NM_001081557:732801 | Camta1     | INSIDE                 | 0.316                                           | 0.605                            | 1254.59             | 758.51              | 0.191                            | 959.68              | 183.07              |
| A_68_P23415140 | chr4:151236795-151236839                          | NM_001081557:-939   | Camta1     | PROMOTER               | 0.500                                           | 0.631                            | 1044.21             | 659.27              | 0.316                            | 825.57              | 260.62              |
| A_68_P27902011 | chr11:70483347-70483401                           | NM_001190376:18233  | Camta2     | INSIDE                 | 0.238                                           | 1.484                            | 1534.86             | 2277.19             | 0.353                            | 1109.53             | 392.16              |
| A_68_P27902141 | chr11:70501579-70501623                           | NM_001190376:7      | Camta2     | INSIDE                 | 0.223                                           | 0.408                            | 1899.04             | 774.26              | 0.091                            | 1384.81             | 125.96              |
| A_68_P27489860 | chr10:118677501-118677545                         | NM_027994:-411      | Cand1      | PROMOTER               | 0.253                                           | 0.658                            | 1529.32             | 1006.46             | 0.167                            | 1147.21             | 191.22              |
| A_68_P24772854 | chr6:115724644-115724688                          | NM_025958:92        | Cand2      | INSIDE                 | 0.104                                           | 1.742                            | 3122.07             | 5438.23             | 0.182                            | 2126.47             | 386.65              |
| A_68_P27788009 | chr11:50139294-50139338                           | NM_001110499:-141   | Canx       | PROMOTER               | 0.471                                           | 0.466                            | 1378.00             | 642.66              | 0.220                            | 1091.46             | 239.59              |
| A_68_P23259659 | chr4:122562951-122562995                          | NM_007598:152       | Cap1       | INSIDE                 | 0.386                                           | 0.563                            | 1933.48             | 1087.93             | 0.217                            | 1356.49             | 294.41              |
| A_68_P23259661 | chr4:122563178-122563222                          | NM_007598:-76       | Cap1       | PROMOTER               | 0.165                                           | 0.622                            | 1470.39             | 914.75              | 0.102                            | 1174.15             | 120.25              |
| A_68_P31932216 | chr19:6015590-6015634                             | NM_007600:-365      | Capn1      | PROMOTER               | 0.297                                           | 0.502                            | 2108.34             | 1058.29             | 0.149                            | 1674.37             | 249.26              |
| A_68_P31932217 | chr19:6015773-6015817                             | NM_007600:-547      | Capn1      | PROMOTER               | 0.344                                           | 0.592                            | 2441.53             | 1444.31             | 0.203                            | 1880.58             | 382.65              |
| A_68_P31202232 | chr17:45767295-45767346                           | NM_001013767:28938  | Capn11     | INSIDE                 | 0.201                                           | 0.545                            | 1439.37             | 784.15              | 0.109                            | 1084.88             | 118.51              |
| A_68_P20887292 | chr11:184447385-184447429                         | NM_009794:208       | Capn2      | INSIDE                 | 0.214                                           | 0.529                            | 1722.29             | 911.49              | 0.113                            | 1424.86             | 161.52              |
| A_68_P25354352 | chr7:105326428-105326472                          | NM_007602:253       | Capn5      | INSIDE                 | 0.392                                           | 0.666                            | 2220.45             | 1478.16             | 0.261                            | 1546.65             | 403.21              |
| A_68_P24942635 | chr6:148844880-148844924                          | NM_181541:-254      | Caprin2    | PROMOTER               | 0.288                                           | 0.636                            | 1656.30             | 1053.88             | 0.183                            | 1278.52             | 233.94              |
| A_68_P22393605 | chr3:104667362-104667406                          | NM_009797:39        | Capza1     | INSIDE                 | 0.621                                           | 0.739                            | 2537.34             | 1875.67             | 0.459                            | 2024.34             | 928.75              |
| A_68_P28025142 | chr11:92961341-92961387                           | NM_028296:761       | Car10      | INSIDE                 | 0.027                                           | 1.596                            | 3914.31             | 6247.50             | 0.043                            | 2760.61             | 119.50              |

| ProbeName      | Target position of probe on CpG island microarray | TargetID            | GeneSymbol | CpG island Description | Ratio of relative methylation (TiO2-NP/Vehicle) | Sham group                       |                     |                     | TiO <sub>2</sub> -H group        |                     |                     |
|----------------|---------------------------------------------------|---------------------|------------|------------------------|-------------------------------------------------|----------------------------------|---------------------|---------------------|----------------------------------|---------------------|---------------------|
|                |                                                   |                     |            |                        |                                                 | Relative methylation (Cy-5/Cy-3) | Cy-3 signal (Input) | Cy-5 signal (MeDIP) | Relative methylation (Cy-5/Cy-3) | Cy-3 signal (Input) | Cy-5 signal (MeDIP) |
| A_68_P28025143 | chr11:92961409-92961453                           | NM_028296:827       | Car10      | INSIDE                 | 0.168                                           | 1.628                            | 4195.42             | 6831.32             | 0.273                            | 2752.95             | 752.64              |
| A_68_P27980570 | chr11:84771638-84771682                           | NM_007607:405       | Car4       | INSIDE                 | 0.173                                           | 0.465                            | 2011.08             | 935.28              | 0.081                            | 1491.58             | 120.23              |
| A_68_P27980571 | chr11:84771814-84771858                           | NM_007607:581       | Car4       | INSIDE                 | 0.238                                           | 0.464                            | 1397.64             | 648.16              | 0.110                            | 1205.84             | 132.91              |
| A_68_P26129050 | chr8:107065100-107065144                          | NM_053070:416       | Car7       | INSIDE                 | 0.623                                           | 0.616                            | 1457.84             | 898.37              | 0.384                            | 1326.11             | 509.07              |
| A_68_P30362466 | chr15:78632748-78632792                           | NM_130859:702       | Card10     | INSIDE                 | 0.500                                           | 0.581                            | 1544.53             | 897.58              | 0.290                            | 1268.59             | 368.48              |
| A_68_P25655856 | chr8:11497567-11497611                            | NM_026995:21        | Carkd      | INSIDE                 | 0.632                                           | 0.426                            | 1901.22             | 809.80              | 0.269                            | 1558.69             | 419.41              |
| A_68_P31921523 | chr19:4169744-4169788                             | NM_134148:5713      | Carns1     | INSIDE                 | 0.213                                           | 0.718                            | 2056.57             | 1476.48             | 0.153                            | 1352.51             | 206.71              |
| A_68_P29265994 | chr13:100670562-100670606                         | NM_001081493:54     | Cartpt     | INSIDE                 | 0.613                                           | 0.490                            | 1785.71             | 874.59              | 0.300                            | 1439.31             | 432.37              |
| A_68_P24921625 | chr6:145159463-145159508                          | NM_177222:5         | Case1      | INSIDE                 | 0.282                                           | 0.611                            | 1361.87             | 831.85              | 0.172                            | 1001.41             | 172.43              |
| A_68_P21583233 | chr2:121692537-121692581                          | NM_001205369:-147   | Case4      | PROMOTER               | 0.168                                           | 0.650                            | 1582.77             | 1029.49             | 0.109                            | 1109.67             | 121.50              |
| A_68_P24205537 | chr6:4550857-4550901                              | NM_145398:-187      | Casd1      | PROMOTER               | 0.666                                           | 0.598                            | 1044.51             | 624.91              | 0.398                            | 851.82              | 339.45              |
| A_68_P28155482 | chr11:115674860-115674904                         | NM_080643:24        | Caskin2    | INSIDE                 | 0.193                                           | 0.515                            | 1341.42             | 691.00              | 0.099                            | 1189.23             | 118.05              |
| A_68_P22522754 | chr3:129604639-129604686                          | NM_009811:320       | Casp6      | INSIDE                 | 0.308                                           | 0.684                            | 1224.78             | 837.20              | 0.210                            | 872.90              | 183.60              |
| A_68_P32200577 | chr19:56471803-56471847                           | NM_007611:206       | Casp7      | INSIDE                 | 0.200                                           | 0.544                            | 2040.89             | 1110.40             | 0.109                            | 1849.95             | 200.84              |
| A_68_P22822455 | chr4:32702059-32702108                            | NM_001122978:-364   | Casp8ap2   | PROMOTER               | 0.438                                           | 0.588                            | 1196.61             | 703.15              | 0.257                            | 1015.33             | 261.36              |
| A_68_P22822463 | chr4:32702764-32702814                            | NM_001122978:341    | Casp8ap2   | INSIDE                 | 0.250                                           | 0.431                            | 1458.07             | 627.89              | 0.108                            | 1082.94             | 116.47              |
| A_68_P23366007 | chr4:141349370-141349414                          | NM_015733:-134      | Casp9      | DIVERGENT_PROMOTER     | 0.184                                           | 1.354                            | 4764.33             | 6450.46             | 0.249                            | 3352.77             | 836.26              |
| A_68_P23366008 | chr4:141349558-141349602                          | NM_015733:54        | Casp9      | INSIDE                 | 0.525                                           | 3.292                            | 6717.58             | 22113.85            | 1.728                            | 4665.93             | 8061.83             |
| A_68_P23396583 | chr4:148179764-148179808                          | NM_027195:1286      | Casz1      | INSIDE                 | 0.646                                           | 0.546                            | 2151.18             | 1175.23             | 0.353                            | 1743.54             | 615.11              |
| A_68_P23396586 | chr4:148180019-148180067                          | NM_027195:1542      | Casz1      | INSIDE                 | 0.254                                           | 0.482                            | 1461.78             | 704.77              | 0.122                            | 1024.98             | 125.37              |
| A_68_P23396591 | chr4:148180645-148180689                          | NM_027195:2166      | Casz1      | INSIDE                 | 0.247                                           | 0.605                            | 1078.19             | 652.15              | 0.150                            | 851.78              | 127.34              |
| A_68_P23397203 | chr4:148265241-148265285                          | NM_027195:86762     | Casz1      | INSIDE                 | 0.323                                           | 0.745                            | 3039.69             | 2264.27             | 0.241                            | 2187.80             | 526.88              |
| A_68_P23397714 | chr4:148326567-148326611                          | NM_001159344:148088 | Casz1      | INSIDE                 | 0.319                                           | 0.446                            | 4925.34             | 2196.24             | 0.142                            | 3600.04             | 511.90              |
| A_68_P27170204 | chr10:59165501-59165545                           | NM_144822:140       | Cbara1     | INSIDE                 | 0.122                                           | 0.649                            | 2515.02             | 1632.99             | 0.079                            | 1963.89             | 155.06              |
| A_68_P21760474 | chr2:154262689-154262733                          | NM_009823:491       | Cbfa2t2    | INSIDE                 | 0.462                                           | 0.638                            | 1453.33             | 927.53              | 0.295                            | 1239.88             | 365.91              |
| A_68_P28331589 | chr12:32183737-32183789                           | NM_134048:643       | Cbl1l      | INSIDE                 | 0.331                                           | 0.464                            | 1148.20             | 533.15              | 0.154                            | 969.88              | 149.27              |
| A_68_P28331590 | chr12:32183836-32183892                           | NM_134048:541       | Cbl1l      | INSIDE                 | 0.246                                           | 0.561                            | 1151.20             | 645.59              | 0.138                            | 906.59              | 125.16              |
| A_68_P28331599 | chr12:32184853-32184897                           | NM_134048:-469      | Cbl1l      | PROMOTER               | 0.383                                           | 0.648                            | 1114.88             | 722.24              | 0.248                            | 898.13              | 223.06              |
| A_68_P26035014 | chr8:89994814-89994859                            | NM_019626:1655      | Cbln1      | INSIDE                 | 0.169                                           | 0.540                            | 1620.93             | 875.25              | 0.091                            | 1331.72             | 121.85              |
| A_68_P26035015 | chr8:89994889-89994933                            | NM_019626:1581      | Cbln1      | INSIDE                 | 0.254                                           | 0.579                            | 1616.71             | 935.56              | 0.147                            | 1169.52             | 171.59              |
| A_68_P26035016 | chr8:89994962-89995006                            | NM_019626:1507      | Cbln1      | INSIDE                 | 0.163                                           | 0.547                            | 1863.52             | 1019.39             | 0.089                            | 1317.44             | 117.26              |
| A_68_P26035027 | chr8:89996039-89996083                            | NM_019626:431       | Cbln1      | INSIDE                 | 0.313                                           | 0.497                            | 2682.57             | 1334.19             | 0.156                            | 1960.44             | 305.02              |
| A_68_P31899538 | chr18:86881037-86881081                           | NM_172633:-1381     | Cbln2      | PROMOTER               | 0.067                                           | 1.702                            | 14900.30            | 25364.05            | 0.114                            | 9814.59             | 1123.72             |
| A_68_P31899539 | chr18:86881114-86881158                           | NM_172633:-1303     | Cbln2      | PROMOTER               | 0.075                                           | 2.705                            | 5819.18             | 15742.21            | 0.203                            | 3236.54             | 658.59              |
| A_68_P31899540 | chr18:86881200-86881249                           | NM_172633:-1215     | Cbln2      | PROMOTER               | 0.033                                           | 3.469                            | 1983.08             | 6878.59             | 0.114                            | 1062.30             | 120.80              |
| A_68_P31899554 | chr18:86882710-86882754                           | NM_172633:293       | Cbln2      | INSIDE                 | 0.337                                           | 0.554                            | 1159.27             | 642.23              | 0.186                            | 982.22              | 183.16              |
| A_68_P21862266 | chr2:171868455-171868499                          | NM_175631:490       | Cbln4      | INSIDE                 | 0.220                                           | 0.476                            | 1245.34             | 593.24              | 0.105                            | 1123.41             | 117.97              |
| A_68_P30976751 | chr16:93608089-93608133                           | NM_007620:29        | Cbr1       | INSIDE                 | 0.356                                           | 0.552                            | 1337.60             | 738.25              | 0.196                            | 1234.39             | 242.53              |
| A_68_P30977032 | chr16:93683403-93683447                           | NM_173047:-39       | Cbr3       | PROMOTER               | 0.558                                           | 0.567                            | 1827.85             | 1036.24             | 0.316                            | 1438.18             | 454.79              |
| A_68_P30977033 | chr16:93683476-93683520                           | NM_173047:35        | Cbr3       | INSIDE                 | 0.575                                           | 0.313                            | 1765.34             | 552.66              | 0.180                            | 1377.70             | 248.14              |
| A_68_P30977036 | chr16:93683818-93683862                           | NM_173047:377       | Cbr3       | INSIDE                 | 0.255                                           | 0.518                            | 2863.07             | 1482.08             | 0.132                            | 2135.60             | 281.40              |
| A_68_P31140913 | chr17:31773722-31773766                           | NM_178224:332       | Cbs        | INSIDE                 | 0.265                                           | 0.493                            | 1674.74             | 825.27              | 0.130                            | 1345.15             | 175.42              |
| A_68_P31140915 | chr17:31773909-31773953                           | NM_178224:146       | Cbs        | INSIDE                 | 0.312                                           | 0.708                            | 2004.67             | 1420.17             | 0.221                            | 1690.64             | 373.21              |
| A_68_P31140916 | chr17:31774060-31774104                           | NM_178224:-6        | Cbs        | PROMOTER               | 0.232                                           | 0.365                            | 1673.06             | 610.58              | 0.085                            | 1378.49             | 116.65              |

| ProbeName      | Target position of probe on CpG island microarray | TargetID           | GeneSymbol | CpG island Description | Ratio of relative methylation (TiO2-NP/Vehicle) | Sham group                       |                     |                     | TiO <sub>2</sub> -H group        |                     |                     |
|----------------|---------------------------------------------------|--------------------|------------|------------------------|-------------------------------------------------|----------------------------------|---------------------|---------------------|----------------------------------|---------------------|---------------------|
|                |                                                   |                    |            |                        |                                                 | Relative methylation (Cy-5/Cy-3) | Cy-3 signal (Input) | Cy-5 signal (MeDIP) | Relative methylation (Cy-5/Cy-3) | Cy-3 signal (Input) | Cy-5 signal (MeDIP) |
| A_68_P24444437 | chr6:51420446-51420490                            | NM_007624:-146     | Cbx3       | DIVERGENT_PROMOTER     | 0.193                                           | 0.670                            | 1005.84             | 674.35              | 0.129                            | 914.19              | 118.11              |
| A_68_P28175793 | chr11:118951344-118951390                         | NM_007625:-3815    | Cbx4       | PROMOTER               | 0.353                                           | 1.551                            | 4847.13             | 7516.25             | 0.547                            | 3290.46             | 1798.99             |
| A_68_P28175796 | chr11:118951645-118951689                         | NM_007625:-4115    | Cbx4       | PROMOTER               | 0.313                                           | 0.570                            | 1703.95             | 971.16              | 0.178                            | 1352.97             | 241.16              |
| A_68_P28175797 | chr11:118951776-118951826                         | NM_007625:-4249    | Cbx4       | PROMOTER               | 0.465                                           | 0.712                            | 1396.94             | 995.03              | 0.332                            | 1080.57             | 358.28              |
| A_68_P28175801 | chr11:118952251-118952295                         | NM_007625:-4721    | Cbx4       | PROMOTER               | 0.184                                           | 0.488                            | 2060.99             | 1006.73             | 0.090                            | 1576.34             | 141.99              |
| A_68_P28175804 | chr11:118952556-118952600                         | NM_007625:-5027    | Cbx4       | PROMOTER               | 0.437                                           | 0.467                            | 1441.59             | 672.56              | 0.204                            | 1179.66             | 240.53              |
| A_68_P30502657 | chr15:103013103-103013147                         | NM_001110216:32659 | Cbx5       | DOWNSTREAM             | 0.663                                           | 0.512                            | 1157.92             | 592.32              | 0.339                            | 1091.68             | 370.28              |
| A_68_P30369303 | chr15:79763884-79763928                           | NM_144811:-830     | Cbx7       | PROMOTER               | 0.381                                           | 0.614                            | 1036.84             | 637.03              | 0.234                            | 902.92              | 211.45              |
| A_68_P30369305 | chr15:79764056-79764100                           | NM_144811:-1002    | Cbx7       | PROMOTER               | 0.243                                           | 0.517                            | 1337.74             | 692.07              | 0.126                            | 1058.17             | 133.11              |
| A_68_P28175446 | chr11:118902080-118902124                         | NM_013926:125      | Cbx8       | INSIDE                 | 0.178                                           | 0.588                            | 3311.35             | 1947.04             | 0.105                            | 2201.83             | 230.95              |
| A_68_P28175448 | chr11:118902325-118902369                         | NM_013926:-119     | Cbx8       | PROMOTER               | 0.467                                           | 0.643                            | 2083.81             | 1339.54             | 0.300                            | 1467.55             | 440.81              |
| A_68_P28175453 | chr11:118902817-118902861                         | NM_013926:-611     | Cbx8       | PROMOTER               | 0.267                                           | 0.668                            | 5932.39             | 3962.21             | 0.178                            | 4121.47             | 734.38              |
| A_68_P28175454 | chr11:118902921-118902967                         | NM_013926:-717     | Cbx8       | PROMOTER               | 0.119                                           | 0.624                            | 2397.33             | 1496.36             | 0.075                            | 1616.81             | 120.46              |
| A_68_P26018414 | chr8:86671587-86671631                            | NM_145970:44       | Cc2d1a     | INSIDE                 | 0.424                                           | 0.656                            | 1816.16             | 1190.95             | 0.278                            | 1331.89             | 370.06              |
| A_68_P23196910 | chr4:108292768-108292812                          | NM_177045:230      | Cc2d1b     | INSIDE                 | 0.539                                           | 0.612                            | 4166.43             | 2548.41             | 0.330                            | 2976.81             | 981.07              |
| A_68_P23196911 | chr4:108292854-108292898                          | NM_177045:316      | Cc2d1b     | INSIDE                 | 0.172                                           | 0.657                            | 1710.43             | 1124.28             | 0.113                            | 1164.67             | 131.62              |
| A_68_P23196912 | chr4:108293003-108293049                          | NM_177045:466      | Cc2d1b     | INSIDE                 | 0.386                                           | 0.559                            | 1352.55             | 755.60              | 0.215                            | 918.88              | 197.95              |
| A_68_P27187842 | chr10:62254957-62255001                           | NM_026201:138      | Ccar1      | INSIDE                 | 0.201                                           | 0.465                            | 1658.33             | 771.11              | 0.093                            | 1248.31             | 116.57              |
| A_68_P31786168 | chr18:66451122-66451166                           | NM_178793:348      | Ccebe1     | INSIDE                 | 0.132                                           | 0.583                            | 2758.49             | 1607.95             | 0.077                            | 2137.94             | 164.38              |
| A_68_P21101913 | chr2:30061520-30061564                            | NM_172404:-323     | Cceb11     | PROMOTER               | 0.223                                           | 0.406                            | 3242.53             | 1316.38             | 0.091                            | 2507.03             | 227.35              |
| A_68_P21101914 | chr2:30061663-30061707                            | NM_172404:-465     | Cceb11     | PROMOTER               | 0.300                                           | 0.497                            | 2037.06             | 1013.36             | 0.149                            | 1516.18             | 226.33              |
| A_68_P22592103 | chr3:142364167-142364211                          | NM_173763:145      | Cceb12     | INSIDE                 | 0.233                                           | 0.573                            | 2890.94             | 1655.59             | 0.133                            | 2268.19             | 302.15              |
| A_68_P26080248 | chr8:97441798-97441842                            | NM_001033533:178   | Ccdc102a   | INSIDE                 | 0.202                                           | 0.696                            | 1400.12             | 974.39              | 0.141                            | 1161.98             | 163.33              |
| A_68_P27275483 | chr10:78215546-78215590                           | NM_027630:244      | Ccdc105    | INSIDE                 | 0.327                                           | 0.515                            | 1222.98             | 630.21              | 0.168                            | 988.39              | 166.34              |
| A_68_P27275484 | chr10:78215712-78215756                           | NM_027630:78       | Ccdc105    | INSIDE                 | 0.181                                           | 0.558                            | 2358.13             | 1314.68             | 0.101                            | 1792.99             | 181.33              |
| A_68_P24951853 | chr7:5011977-5012021                              | NM_146178:3671     | Ccdc106    | INSIDE                 | 0.463                                           | 0.432                            | 1382.32             | 596.92              | 0.200                            | 1177.84             | 235.28              |
| A_68_P22871974 | chr4:43506583-43506627                            | NM_001037913:368   | Ccdc107    | INSIDE                 | 0.334                                           | 0.565                            | 1528.06             | 862.84              | 0.188                            | 1207.56             | 227.47              |
| A_68_P22523142 | chr3:129672517-129672561                          | NM_025779:586      | Ccdc109b   | INSIDE                 | 0.392                                           | 0.505                            | 2604.71             | 1315.65             | 0.198                            | 1951.55             | 386.76              |
| A_68_P27563901 | chr11:5442216-5442260                             | NM_134033:-18      | Ccdc117    | PROMOTER               | 0.344                                           | 0.718                            | 1718.50             | 1233.47             | 0.247                            | 1349.64             | 333.42              |
| A_68_P26825042 | chr9:110559281-110559325                          | NM_028312:296      | Ccdc12     | INSIDE                 | 0.482                                           | 0.617                            | 2313.78             | 1428.18             | 0.297                            | 1753.97             | 521.53              |
| A_68_P29737459 | chr14:77436746-77436790                           | NM_175369:190      | Ccdc122    | INSIDE                 | 0.502                                           | 0.696                            | 1125.01             | 783.27              | 0.350                            | 1001.93             | 350.47              |
| A_68_P29269562 | chr13:101439843-101439887                         | NM_001168386:429   | Ccdc125    | INSIDE                 | 0.258                                           | 0.498                            | 1358.06             | 676.80              | 0.129                            | 1221.28             | 157.21              |
| A_68_P24432032 | chr6:49269455-49269499                            | NM_175098:125      | Ccdc126    | INSIDE                 | 0.313                                           | 0.599                            | 1074.03             | 643.78              | 0.188                            | 910.61              | 170.88              |
| A_68_P24432033 | chr6:49269637-49269686                            | NM_175098:310      | Ccdc126    | INSIDE                 | 0.537                                           | 0.626                            | 854.45              | 535.11              | 0.336                            | 757.41              | 254.51              |
| A_68_P26885914 | chr9:121748048-121748092                          | NM_028384:509      | Ccdc13     | INSIDE                 | 0.565                                           | 0.632                            | 920.03              | 581.07              | 0.357                            | 657.55              | 234.52              |
| A_68_P26885918 | chr9:121748458-121748502                          | NM_028384:99       | Ccdc13     | INSIDE                 | 0.609                                           | 0.709                            | 1349.44             | 956.93              | 0.432                            | 1078.83             | 465.64              |
| A_68_P26019094 | chr8:86794146-86794190                            | NM_026350:91       | Ccdc130    | INSIDE                 | 0.667                                           | 0.639                            | 2432.78             | 1555.21             | 0.426                            | 1849.34             | 788.59              |
| A_68_P30381572 | chr15:81958155-81958201                           | NM_172428:-173     | Ccdc134    | PROMOTER               | 0.161                                           | 0.544                            | 2619.49             | 1425.71             | 0.088                            | 1801.50             | 157.69              |
| A_68_P30381575 | chr15:81958547-81958591                           | NM_172428:217      | Ccdc134    | INSIDE                 | 0.184                                           | 0.688                            | 2056.79             | 1414.21             | 0.126                            | 1528.30             | 193.02              |
| A_68_P30381577 | chr15:81958707-81958759                           | NM_172428:381      | Ccdc134    | INSIDE                 | 0.040                                           | 1.497                            | 3033.92             | 4542.02             | 0.060                            | 2027.68             | 122.01              |
| A_68_P28184671 | chr11:120319473-120319517                         | NM_152807:52       | Ccdc137    | INSIDE                 | 0.360                                           | 0.574                            | 2047.05             | 1174.06             | 0.206                            | 1632.56             | 336.62              |
| A_68_P28184672 | chr11:120319589-120319633                         | NM_152807:168      | Ccdc137    | INSIDE                 | 0.155                                           | 0.666                            | 1592.81             | 1060.55             | 0.103                            | 1147.62             | 118.38              |
| A_68_P26430108 | chr9:37155823-37155867                            | NM_001081429:133   | Ccdc15     | INSIDE                 | 0.176                                           | 0.675                            | 1495.98             | 1009.74             | 0.119                            | 1046.17             | 124.28              |
| A_68_P23895411 | chr5:93104067-93104111                            | NM_177230:65       | Ccdc158    | INSIDE                 | 0.534                                           | 0.730                            | 1930.12             | 1408.97             | 0.390                            | 1535.13             | 598.00              |

| ProbeName      | Target position of probe on CpG island microarray | TargetID           | GeneSymbol | CpG island Description | Ratio of relative methylation (TiO2-NP/Vehicle) | Sham group                       |                     |                     | TiO <sub>2</sub> -H group        |                     |                     |
|----------------|---------------------------------------------------|--------------------|------------|------------------------|-------------------------------------------------|----------------------------------|---------------------|---------------------|----------------------------------|---------------------|---------------------|
|                |                                                   |                    |            |                        |                                                 | Relative methylation (Cy-5/Cy-3) | Cy-3 signal (Input) | Cy-5 signal (MeDIP) | Relative methylation (Cy-5/Cy-3) | Cy-3 signal (Input) | Cy-5 signal (MeDIP) |
| A_68_P23321454 | chr4:133742757-133742801                          | NM_144527:222      | Ccdc21     | INSIDE                 | 0.194                                           | 0.580                            | 1512.87             | 877.58              | 0.112                            | 1021.32             | 114.73              |
| A_68_P23321458 | chr4:133743204-133743248                          | NM_144527:-226     | Ccdc21     | PROMOTER               | 0.245                                           | 0.628                            | 980.49              | 615.47              | 0.154                            | 795.81              | 122.63              |
| A_68_P23245373 | chr4:119087968-119088012                          | NM_029286:136      | Ccdc30     | INSIDE                 | 0.375                                           | 0.511                            | 2076.30             | 1061.75             | 0.192                            | 1777.26             | 340.50              |
| A_68_P23245376 | chr4:119088209-119088253                          | NM_029286:-104     | Ccdc30     | PROMOTER               | 0.341                                           | 0.653                            | 1052.61             | 687.63              | 0.223                            | 849.73              | 189.12              |
| A_68_P21518697 | chr2:109857970-109858014                          | NM_026613:19       | Ccdc34     | INSIDE                 | 0.250                                           | 0.385                            | 1651.79             | 636.17              | 0.096                            | 1266.09             | 121.78              |
| A_68_P27360780 | chr10:94151776-94151822                           | NM_029852:264      | Ccdc41     | INSIDE                 | 0.225                                           | 0.510                            | 1519.35             | 774.16              | 0.114                            | 1119.43             | 128.11              |
| A_68_P28103527 | chr11:106650485-106650529                         | NM_001166685:-59   | Ccdc45     | DIVERGENT_PROMOTER     | 0.190                                           | 0.524                            | 1551.87             | 813.42              | 0.099                            | 1214.68             | 120.75              |
| A_68_P24617811 | chr6:87680675-87680719                            | NM_001159697:-166  | Ccdc48     | PROMOTER               | 0.351                                           | 0.727                            | 4984.09             | 3625.21             | 0.256                            | 3364.11             | 859.84              |
| A_68_P24617829 | chr6:87682986-87683030                            | NM_001159697:2146  | Ccdc48     | INSIDE                 | 0.363                                           | 0.632                            | 1753.37             | 1108.15             | 0.229                            | 1543.22             | 354.13              |
| A_68_P28187623 | chr11:120794145-120794189                         | NM_027745:20       | Ccdc57     | INSIDE                 | 0.485                                           | 0.666                            | 1253.90             | 834.77              | 0.323                            | 1006.35             | 324.87              |
| A_68_P28187624 | chr11:120794237-120794281                         | NM_027745:-72      | Ccdc57     | PROMOTER               | 0.531                                           | 0.630                            | 979.24              | 616.72              | 0.334                            | 694.21              | 232.19              |
| A_68_P28187625 | chr11:120794313-120794357                         | NM_027745:-148     | Ccdc57     | PROMOTER               | 0.526                                           | 0.484                            | 1751.38             | 848.39              | 0.255                            | 1263.67             | 321.70              |
| A_68_P30673619 | chr16:36072197-36072241                           | NM_001159422:-9142 | Ccdc58     | PROMOTER               | 0.478                                           | 0.554                            | 1163.45             | 644.47              | 0.265                            | 915.06              | 242.18              |
| A_68_P27418182 | chr10:105278621-105278665                         | NM_025602:108      | Ccdc59     | INSIDE                 | 0.348                                           | 0.601                            | 1307.64             | 785.41              | 0.209                            | 1008.25             | 210.65              |
| A_68_P27228313 | chr10:69652213-69652261                           | NM_001111121:92368 | Ccdc6      | INSIDE                 | 0.590                                           | 3.830                            | 1022.68             | 3916.45             | 2.259                            | 799.74              | 1807.01             |
| A_68_P24990312 | chr7:19477759-19477803                            | NM_001033314:17973 | Ccdc61     | INSIDE                 | 0.630                                           | 0.421                            | 1511.52             | 636.40              | 0.265                            | 1289.45             | 341.99              |
| A_68_P24990418 | chr7:19495547-19495597                            | NM_001033314:181   | Ccdc61     | INSIDE                 | 0.202                                           | 0.598                            | 1461.41             | 873.69              | 0.121                            | 1130.10             | 136.73              |
| A_68_P24011279 | chr5:116181126-116181170                          | NM_001080808:420   | Ccdc64     | INSIDE                 | 0.242                                           | 0.452                            | 2184.71             | 988.45              | 0.109                            | 1684.64             | 184.15              |
| A_68_P26814948 | chr9:108354920-108354964                          | NM_133744:-7906    | Ccdc71     | PROMOTER               | 0.258                                           | 0.682                            | 2070.73             | 1412.54             | 0.176                            | 1567.50             | 275.79              |
| A_68_P26814949 | chr9:108355021-108355065                          | NM_133744:-7806    | Ccdc71     | PROMOTER               | 0.275                                           | 0.418                            | 1408.81             | 588.95              | 0.115                            | 1134.04             | 130.56              |
| A_68_P26814988 | chr9:108363033-108363077                          | NM_133744:206      | Ccdc71     | INSIDE                 | 0.172                                           | 0.549                            | 1732.60             | 951.35              | 0.094                            | 1255.02             | 118.20              |
| A_68_P31373928 | chr17:79234991-79235035                           | NM_181649:157      | Ccdc75     | INSIDE                 | 0.490                                           | 0.608                            | 1355.91             | 823.81              | 0.297                            | 1059.03             | 314.99              |
| A_68_P26128839 | chr8:107033201-107033245                          | NM_180958:565      | Ccdc79     | INSIDE                 | 0.544                                           | 0.619                            | 1433.66             | 887.98              | 0.337                            | 1088.20             | 366.73              |
| A_68_P26467525 | chr9:44225880-44225924                            | NM_201372:188      | Ccdc84     | INSIDE                 | 0.433                                           | 0.632                            | 3188.92             | 2014.72             | 0.274                            | 2379.71             | 650.91              |
| A_68_P26467527 | chr9:44226161-44226205                            | NM_201372:-92      | Ccdc84     | PROMOTER               | 0.277                                           | 0.654                            | 1166.34             | 762.83              | 0.181                            | 1031.60             | 186.87              |
| A_68_P28272042 | chr12:109514039-109514083                         | NM_001159910:-433  | Ccdc85c    | PROMOTER               | 0.112                                           | 0.683                            | 2271.74             | 1550.90             | 0.077                            | 1539.47             | 118.17              |
| A_68_P31953831 | chr19:11023233-11023277                           | NM_023731:502      | Ccdc86     | INSIDE                 | 0.408                                           | 0.643                            | 889.16              | 571.31              | 0.262                            | 716.46              | 187.98              |
| A_68_P27674153 | chr11:29274024-29274068                           | NM_176841:272      | Ccdc88a    | INSIDE                 | 0.567                                           | 0.537                            | 954.11              | 512.21              | 0.304                            | 822.91              | 250.40              |
| A_68_P31936460 | chr19:6930124-6930168                             | NM_001081291:2555  | Ccdc88b    | INSIDE                 | 0.459                                           | 0.654                            | 2669.86             | 1745.79             | 0.300                            | 2085.51             | 626.56              |
| A_68_P28685558 | chr12:102267375-102267419                         | NM_026681:-203     | Ccdc88c    | PROMOTER               | 0.270                                           | 0.407                            | 1691.89             | 689.44              | 0.110                            | 1231.55             | 135.74              |
| A_68_P25325434 | chr7:99709780-99709824                            | NM_001162918:144   | Ccdc90b    | INSIDE                 | 0.647                                           | 0.703                            | 1190.19             | 836.67              | 0.454                            | 937.76              | 426.20              |
| A_68_P24934669 | chr6:147424894-147424938                          | NM_025911:524      | Ccdc91     | INSIDE                 | 0.323                                           | 0.543                            | 1210.07             | 657.52              | 0.175                            | 1003.08             | 175.85              |
| A_68_P31252978 | chr17:56098506-56098550                           | NM_028381:-81      | Ccdc94     | PROMOTER               | 0.565                                           | 0.506                            | 1125.72             | 569.95              | 0.286                            | 834.62              | 238.95              |
| A_68_P31252979 | chr17:56098596-56098641                           | NM_028381:9        | Ccdc94     | INSIDE                 | 0.300                                           | 0.628                            | 842.30              | 529.27              | 0.189                            | 638.62              | 120.51              |
| A_68_P23607907 | chr5:36827498-36827542                            | NM_025725:284      | Ccdc96     | INSIDE                 | 0.385                                           | 0.615                            | 1350.55             | 830.38              | 0.236                            | 1084.30             | 256.36              |
| A_68_P25011514 | chr7:26503814-26503858                            | NM_028771:236      | Ccdc97     | INSIDE                 | 0.185                                           | 0.624                            | 1508.25             | 941.49              | 0.116                            | 1041.96             | 120.40              |
| A_68_P25011515 | chr7:26503925-26503969                            | NM_028771:126      | Ccdc97     | INSIDE                 | 0.437                                           | 0.397                            | 2050.70             | 813.70              | 0.173                            | 1600.72             | 277.58              |
| A_68_P27702675 | chr11:34646901-34646945                           | NM_027411:221      | Ccdc99     | INSIDE                 | 0.216                                           | 0.342                            | 1771.09             | 606.24              | 0.074                            | 1558.20             | 114.97              |
| A_68_P27702677 | chr11:34647134-34647181                           | NM_027411:-14      | Ccdc99     | PROMOTER               | 0.227                                           | 0.567                            | 1373.61             | 779.00              | 0.129                            | 949.47              | 122.32              |
| A_68_P26883803 | chr9:121403379-121403423                          | NM_031161:1407     | Cck        | INSIDE                 | 0.513                                           | 0.743                            | 2674.70             | 1987.12             | 0.381                            | 1869.53             | 711.97              |
| A_68_P26883806 | chr9:121403762-121403806                          | NM_031161:1023     | Cck        | INSIDE                 | 0.203                                           | 0.591                            | 2642.63             | 1560.77             | 0.120                            | 1986.84             | 238.69              |
| A_68_P25392269 | chr7:112574333-112574377                          | NM_007627:21       | Cckbr      | INSIDE                 | 0.204                                           | 0.744                            | 3037.40             | 2261.06             | 0.152                            | 2333.85             | 354.73              |
| A_68_P25392273 | chr7:112574745-112574790                          | NM_007627:434      | Cckbr      | INSIDE                 | 0.133                                           | 1.597                            | 1130.99             | 1806.52             | 0.213                            | 807.15              | 172.02              |
| A_68_P22058853 | chr3:36470390-36470434                            | NM_009828:506      | Ccna2      | INSIDE                 | 0.149                                           | 0.518                            | 3345.40             | 1733.49             | 0.077                            | 2152.20             | 166.69              |

| ProbeName      | Target position of probe on CpG island microarray | TargetID          | GeneSymbol | CpG island Description | Ratio of relative methylation (TiO2-NP/Vehicle) | Sham group                       |                     |                     | TiO <sub>2</sub> -H group        |                     |                     |
|----------------|---------------------------------------------------|-------------------|------------|------------------------|-------------------------------------------------|----------------------------------|---------------------|---------------------|----------------------------------|---------------------|---------------------|
|                |                                                   |                   |            |                        |                                                 | Relative methylation (Cy-5/Cy-3) | Cy-3 signal (Input) | Cy-5 signal (MeDIP) | Relative methylation (Cy-5/Cy-3) | Cy-3 signal (Input) | Cy-5 signal (MeDIP) |
| A_68_P22058854 | chr3:36470470-36470514                            | NM_009828:426     | Ccna2      | INSIDE                 | 0.142                                           | 0.588                            | 5226.28             | 3071.76             | 0.083                            | 3578.10             | 297.82              |
| A_68_P25610226 | chr7:152128254-152128298                          | NM_007631:-2446   | Ccnd1      | PROMOTER               | 0.662                                           | 0.407                            | 1574.16             | 639.92              | 0.269                            | 1284.45             | 345.41              |
| A_68_P25610231 | chr7:152128709-152128753                          | NM_007631:-2900   | Ccnd1      | PROMOTER               | 0.364                                           | 0.447                            | 1161.38             | 519.42              | 0.163                            | 858.28              | 139.89              |
| A_68_P24831041 | chr6:127100503-127100547                          | NM_009829:542     | Ccnd2      | INSIDE                 | 0.155                                           | 0.605                            | 1758.37             | 1063.19             | 0.094                            | 1315.53             | 123.56              |
| A_68_P24831080 | chr6:127105235-127105279                          | NM_009829:-4190   | Ccnd2      | PROMOTER               | 0.640                                           | 0.712                            | 1507.40             | 1073.68             | 0.456                            | 1322.49             | 603.22              |
| A_68_P21578342 | chr2:120834147-120834191                          | NM_010761:25      | Ccndbp1    | INSIDE                 | 0.207                                           | 0.497                            | 1474.35             | 732.77              | 0.103                            | 1131.62             | 116.70              |
| A_68_P25065442 | chr7:38892952-38892996                            | NM_007633:-465    | Ccne1      | PROMOTER               | 0.350                                           | 0.497                            | 4907.98             | 2437.19             | 0.174                            | 3349.10             | 581.82              |
| A_68_P23898891 | chr5:93696983-93697027                            | NM_007635:406     | Ccng2      | INSIDE                 | 0.281                                           | 0.502                            | 1240.12             | 622.20              | 0.141                            | 890.36              | 125.31              |
| A_68_P32111334 | chr19:40906541-40906585                           | NM_172839:794     | Ccnj       | INSIDE                 | 0.638                                           | 0.367                            | 1696.24             | 621.81              | 0.234                            | 1386.38             | 324.13              |
| A_68_P27750956 | chr11:43342693-43342737                           | NM_001045530:429  | Ccnjl      | INSIDE                 | 0.486                                           | 0.645                            | 2025.15             | 1305.63             | 0.313                            | 1622.45             | 508.59              |
| A_68_P22202884 | chr3:65762093-65762137                            | NM_019937:33      | Ccnl1      | INSIDE                 | 0.642                                           | 0.497                            | 2814.84             | 1398.89             | 0.319                            | 2196.65             | 700.89              |
| A_68_P22202886 | chr3:65762239-65762283                            | NM_019937:-113    | Ccnl1      | PROMOTER               | 0.516                                           | 0.713                            | 1822.10             | 1298.53             | 0.368                            | 1502.71             | 552.31              |
| A_68_P22202887 | chr3:65762326-65762370                            | NM_019937:-201    | Ccnl1      | PROMOTER               | 0.519                                           | 0.591                            | 1278.90             | 756.02              | 0.307                            | 1053.73             | 323.14              |
| A_68_P23440735 | chr4:155186739-155186783                          | NM_207678:163     | Ccnl2      | INSIDE                 | 0.188                                           | 0.500                            | 4519.25             | 2258.53             | 0.094                            | 3204.71             | 300.89              |
| A_68_P30475237 | chr15:98398586-98398630                           | NM_009833:-541    | Ccnt1      | PROMOTER               | 0.270                                           | 0.497                            | 1171.00             | 581.59              | 0.134                            | 878.82              | 117.85              |
| A_68_P20596873 | chr1:129670505-129670549                          | NM_028399:-214    | Ccnt2      | PROMOTER               | 0.362                                           | 0.696                            | 1897.84             | 1321.27             | 0.252                            | 1332.43             | 335.56              |
| A_68_P20596874 | chr1:129670673-129670717                          | NM_028399:-46     | Ccnt2      | PROMOTER               | 0.636                                           | 0.622                            | 2718.22             | 1689.58             | 0.395                            | 2117.80             | 837.57              |
| A_68_P31485624 | chr18:9449444-9449488                             | NM_026484:682     | Ccny       | INSIDE                 | 0.364                                           | 0.626                            | 1079.22             | 675.59              | 0.228                            | 843.35              | 192.32              |
| A_68_P31485630 | chr18:9450058-9450102                             | NM_026484:68      | Ccny       | INSIDE                 | 0.263                                           | 0.645                            | 1115.46             | 719.09              | 0.170                            | 965.71              | 163.73              |
| A_68_P28072387 | chr11:101035328-101035372                         | NM_007721:1407    | Ccr10      | INSIDE                 | 0.355                                           | 0.389                            | 2889.98             | 1123.43             | 0.138                            | 2081.47             | 287.14              |
| A_68_P28072388 | chr11:101035404-101035448                         | NM_007721:1331    | Ccr10      | INSIDE                 | 0.637                                           | 0.568                            | 1405.57             | 798.95              | 0.362                            | 1007.15             | 364.74              |
| A_68_P22128529 | chr3:51028612-51028656                            | NM_009834:266     | Ccm4l      | INSIDE                 | 0.266                                           | 0.692                            | 4112.17             | 2845.24             | 0.184                            | 3149.48             | 578.75              |
| A_68_P22128530 | chr3:51028680-51028724                            | NM_009834:334     | Ccm4l      | INSIDE                 | 0.153                                           | 0.490                            | 2018.20             | 989.37              | 0.075                            | 1568.82             | 117.60              |
| A_68_P27479232 | chr10:116500293-116500343                         | NM_007636:552     | Cct2       | INSIDE                 | 0.292                                           | 0.702                            | 1693.56             | 1188.50             | 0.205                            | 1169.03             | 239.89              |
| A_68_P22312956 | chr3:88101171-88101215                            | NM_009836:136     | Cct3       | INSIDE                 | 0.306                                           | 0.528                            | 1948.15             | 1028.32             | 0.162                            | 1464.90             | 236.89              |
| A_68_P27643749 | chr11:22890683-22890727                           | NM_009837:112     | Cct4       | INSIDE                 | 0.465                                           | 0.693                            | 1394.15             | 966.78              | 0.322                            | 1140.92             | 367.52              |
| A_68_P24605098 | chr6:85401665-85401709                            | NM_007638:188     | Cct7       | INSIDE                 | 0.177                                           | 0.492                            | 1677.19             | 825.62              | 0.087                            | 1338.67             | 116.59              |
| A_68_P30940063 | chr16:87495606-87495650                           | NM_009840:486     | Cct8       | INSIDE                 | 0.286                                           | 0.625                            | 3419.51             | 2137.75             | 0.179                            | 2726.76             | 487.36              |
| A_68_P30940064 | chr16:87495686-87495730                           | NM_009840:406     | Cct8       | INSIDE                 | 0.131                                           | 0.663                            | 1643.15             | 1089.66             | 0.087                            | 1360.88             | 118.03              |
| A_68_P24159039 | chr5:144775595-144775639                          | NM_177682:106     | Ccz1       | INSIDE                 | 0.351                                           | 0.622                            | 2033.64             | 1265.35             | 0.219                            | 1557.24             | 340.40              |
| A_68_P26660362 | chr9:78463468-78463512                            | NM_153098:138     | Cd109      | INSIDE                 | 0.351                                           | 0.433                            | 1680.35             | 727.12              | 0.152                            | 1438.78             | 218.80              |
| A_68_P26660364 | chr9:78463666-78463710                            | NM_153098:336     | Cd109      | INSIDE                 | 0.551                                           | 0.484                            | 2473.96             | 1196.74             | 0.267                            | 2093.29             | 558.35              |
| A_68_P31625483 | chr18:36885784-36885836                           | NM_009841:498     | Cd14       | INSIDE                 | 0.253                                           | 0.719                            | 1472.57             | 1059.13             | 0.182                            | 1077.95             | 196.04              |
| A_68_P27089717 | chr10:41238672-41238716                           | NM_016898:-611    | Cd164      | PROMOTER               | 0.249                                           | 0.416                            | 1409.04             | 586.62              | 0.104                            | 1189.80             | 123.24              |
| A_68_P27089727 | chr10:41239601-41239645                           | NM_016898:317     | Cd164      | INSIDE                 | 0.572                                           | 0.479                            | 1117.35             | 535.70              | 0.274                            | 1158.53             | 317.56              |
| A_68_P27089728 | chr10:41239688-41239732                           | NM_016898:405     | Cd164      | INSIDE                 | 0.540                                           | 0.390                            | 1355.81             | 529.30              | 0.211                            | 1090.99             | 229.82              |
| A_68_P27089721 | chr10:41239063-41239107                           | NM_016898:-221    | Cd164      | PROMOTER               | 0.668                                           | 0.442                            | 1478.47             | 654.22              | 0.295                            | 1128.98             | 333.50              |
| A_68_P27101048 | chr10:43299118-43299162                           | NM_009846:166     | Cd24a      | INSIDE                 | 0.516                                           | 0.599                            | 2997.47             | 1794.56             | 0.309                            | 2305.45             | 711.81              |
| A_68_P31186622 | chr17:43013421-43013465                           | NM_009847:-69     | Cd2ap      | PROMOTER               | 0.650                                           | 0.721                            | 1637.03             | 1179.64             | 0.468                            | 1520.31             | 712.00              |
| A_68_P24992859 | chr7:19945635-19945679                            | NM_145822:-824    | Cd3eap     | DIVERGENT_PROMOTER     | 0.311                                           | 0.402                            | 3657.03             | 1470.39             | 0.125                            | 2771.27             | 346.17              |
| A_68_P20829088 | chr1:173610061-173610105                          | NM_007649:-2103   | Cd48       | PROMOTER               | 0.562                                           | 2.889                            | 2481.68             | 7170.39             | 1.625                            | 2263.70             | 3677.64             |
| A_68_P24820862 | chr6:125444303-125444347                          | NM_007657:449     | Cd9        | INSIDE                 | 0.433                                           | 0.582                            | 1893.00             | 1102.63             | 0.252                            | 1613.75             | 407.23              |
| A_68_P29639450 | chr14:60216642-60216686                           | NM_001168535:132  | Cdade1     | INSIDE                 | 0.581                                           | 0.529                            | 1593.61             | 843.08              | 0.307                            | 1313.86             | 403.51              |
| A_68_P29639453 | chr14:60216909-60216959                           | NM_001168535:-138 | Cdade1     | PROMOTER               | 0.207                                           | 0.705                            | 1290.49             | 909.87              | 0.146                            | 858.38              | 125.57              |



| ProbeName      | Target position of probe on CpG island microarray | TargetID           | GeneSymbol | CpG island Description | Ratio of relative methylation (TiO2-NP/Vehicle) | Sham group                       |                     |                     | TiO <sub>2</sub> -H group        |                     |                     |
|----------------|---------------------------------------------------|--------------------|------------|------------------------|-------------------------------------------------|----------------------------------|---------------------|---------------------|----------------------------------|---------------------|---------------------|
|                |                                                   |                    |            |                        |                                                 | Relative methylation (Cy-5/Cy-3) | Cy-3 signal (Input) | Cy-5 signal (MeDIP) | Relative methylation (Cy-5/Cy-3) | Cy-3 signal (Input) | Cy-5 signal (MeDIP) |
| A_68_P21576978 | chr2:120557105-120557149                          | NM_026891:127      | Cdan1      | INSIDE                 | 0.660                                           | 0.514                            | 2920.88             | 1501.20             | 0.339                            | 2432.31             | 825.35              |
| A_68_P22449310 | chr3:116126022-116126067                          | NM_001080818:906   | Cdc14a     | INSIDE                 | 0.556                                           | 0.599                            | 1344.64             | 805.42              | 0.333                            | 1127.01             | 375.04              |
| A_68_P22449313 | chr3:116126350-116126394                          | NM_001080818:578   | Cdc14a     | INSIDE                 | 0.657                                           | 0.574                            | 1449.04             | 832.43              | 0.377                            | 1155.72             | 436.23              |
| A_68_P23240385 | chr4:118109464-118109508                          | NM_023223:462      | Cdc20      | INSIDE                 | 0.187                                           | 0.679                            | 1416.43             | 961.24              | 0.127                            | 921.42              | 117.20              |
| A_68_P23240388 | chr4:118109735-118109779                          | NM_023223:192      | Cdc20      | INSIDE                 | 0.269                                           | 0.510                            | 5179.82             | 2642.88             | 0.137                            | 3749.47             | 514.66              |
| A_68_P31613997 | chr18:34810920-34810964                           | NM_178347:448      | Cdc23      | INSIDE                 | 0.587                                           | 0.539                            | 1317.81             | 710.65              | 0.316                            | 1280.28             | 405.10              |
| A_68_P31614001 | chr18:34811328-34811372                           | NM_178347:40       | Cdc23      | INSIDE                 | 0.540                                           | 0.692                            | 2518.82             | 1742.23             | 0.373                            | 1822.46             | 680.62              |
| A_68_P22964275 | chr4:62069685-62069729                            | NM_139291:49       | Cdc26      | DIVERGENT_PROMOTER     | 0.623                                           | 0.508                            | 1093.77             | 555.39              | 0.316                            | 846.94              | 268.04              |
| A_68_P26345696 | chr9:20954248-20954292                            | NM_016742:80       | Cdc37      | INSIDE                 | 0.458                                           | 0.666                            | 1284.61             | 855.41              | 0.305                            | 942.60              | 287.57              |
| A_68_P32050464 | chr19:29064739-29064788                           | NM_025950:-220     | Cdc3711    | PROMOTER               | 0.302                                           | 0.491                            | 1312.98             | 644.98              | 0.148                            | 1021.80             | 151.54              |
| A_68_P32050469 | chr19:29065228-29065272                           | NM_025950:267      | Cdc3711    | INSIDE                 | 0.164                                           | 0.678                            | 2356.73             | 1598.79             | 0.111                            | 1781.24             | 197.88              |
| A_68_P20872964 | chr1:181889645-181889689                          | NM_001033285:-1553 | Cdc42bpa   | PROMOTER               | 0.221                                           | 0.579                            | 1329.05             | 769.35              | 0.128                            | 1181.58             | 151.12              |
| A_68_P28743715 | chr12:112615120-112615164                         | NM_183016:787      | Cdc42bpb   | INSIDE                 | 0.186                                           | 0.463                            | 2455.96             | 1138.12             | 0.086                            | 1861.06             | 160.55              |
| A_68_P28743716 | chr12:112615206-112615250                         | NM_183016:701      | Cdc42bpb   | INSIDE                 | 0.258                                           | 0.476                            | 3007.78             | 1430.22             | 0.123                            | 2145.77             | 263.65              |
| A_68_P31933965 | chr19:6320530-6320574                             | NM_001033342:14096 | Cdc42bpg   | INSIDE                 | 0.549                                           | 3.625                            | 1485.09             | 5383.15             | 1.989                            | 1314.89             | 2615.11             |
| A_68_P30362683 | chr15:78673475-78673519                           | NM_027219:420      | Cdc42ep1   | INSIDE                 | 0.242                                           | 0.635                            | 881.58              | 559.83              | 0.154                            | 802.19              | 123.46              |
| A_68_P31376859 | chr17:79754745-79754789                           | NM_026514:-335     | Cdc42ep3   | PROMOTER               | 0.334                                           | 0.667                            | 1932.72             | 1289.86             | 0.223                            | 1495.43             | 333.82              |
| A_68_P28143856 | chr11:113613201-113613245                         | NM_001163346:-93   | Cdc42ep4   | PROMOTER               | 0.558                                           | 0.674                            | 1217.12             | 820.91              | 0.376                            | 970.52              | 364.96              |
| A_68_P24948002 | chr7:4103289-4103333                              | NM_021454:12991    | Cdc42ep5   | INSIDE                 | 0.587                                           | 0.550                            | 1204.32             | 662.79              | 0.323                            | 994.85              | 321.59              |
| A_68_P28059225 | chr11:98769164-98769211                           | NM_001025779:-15   | Cdc6       | PROMOTER               | 0.092                                           | 1.435                            | 3080.32             | 4421.42             | 0.132                            | 1984.56             | 261.01              |
| A_68_P28059226 | chr11:98769291-98769335                           | NM_011799:-152     | Cdc6       | PROMOTER               | 0.196                                           | 1.887                            | 10924.37            | 20613.09            | 0.371                            | 7249.68             | 2687.05             |
| A_68_P28059227 | chr11:98769369-98769413                           | NM_011799:-74      | Cdc6       | PROMOTER               | 0.173                                           | 2.564                            | 6792.48             | 17416.08            | 0.444                            | 4223.49             | 1874.92             |
| A_68_P28059228 | chr11:98769471-98769515                           | NM_011799:28       | Cdc6       | INSIDE                 | 0.344                                           | 1.407                            | 1819.73             | 2560.78             | 0.484                            | 1234.76             | 597.56              |
| A_68_P28752827 | chr12:114066991-114067046                         | NM_028023:582      | Cdea4      | INSIDE                 | 0.353                                           | 0.487                            | 1401.24             | 682.63              | 0.172                            | 1284.88             | 221.07              |
| A_68_P28752829 | chr12:114067223-114067267                         | NM_028023:356      | Cdea4      | INSIDE                 | 0.513                                           | 0.670                            | 3014.77             | 2019.46             | 0.344                            | 2247.10             | 772.13              |
| A_68_P28752832 | chr12:114067540-114067584                         | NM_028023:38       | Cdea4      | INSIDE                 | 0.597                                           | 0.529                            | 3303.95             | 1748.13             | 0.316                            | 2474.00             | 781.15              |
| A_68_P31932622 | chr19:6085142-6085186                             | NM_026410:68       | Cdea5      | INSIDE                 | 0.607                                           | 0.455                            | 2496.54             | 1136.69             | 0.276                            | 2019.11             | 557.75              |
| A_68_P21325834 | chr2:72314810-72314854                            | NM_025866:557      | Cdea7      | INSIDE                 | 0.230                                           | 0.559                            | 1315.79             | 734.89              | 0.128                            | 934.23              | 119.79              |
| A_68_P21325835 | chr2:72314881-72314927                            | NM_025866:629      | Cdea7      | INSIDE                 | 0.319                                           | 0.669                            | 1191.25             | 796.55              | 0.214                            | 945.63              | 201.98              |
| A_68_P28776179 | chr12:119081965-119082009                         | NM_146040:-347     | Cdea71     | PROMOTER               | 0.530                                           | 0.596                            | 922.78              | 549.92              | 0.316                            | 763.66              | 241.31              |
| A_68_P28776182 | chr12:119082285-119082329                         | NM_146040:-27      | Cdea71     | PROMOTER               | 0.663                                           | 0.391                            | 1820.37             | 710.99              | 0.259                            | 1573.66             | 407.71              |
| A_68_P23271159 | chr4:124613810-124613854                          | NM_026560:329      | Cdea8      | INSIDE                 | 0.405                                           | 0.625                            | 2290.39             | 1431.64             | 0.253                            | 1723.95             | 436.25              |
| A_68_P23271162 | chr4:124614141-124614185                          | NM_026560:-1       | Cdea8      | DIVERGENT_PROMOTER     | 0.383                                           | 0.554                            | 1874.20             | 1038.39             | 0.212                            | 1341.22             | 284.79              |
| A_68_P26140465 | chr8:109127899-109127943                          | NM_009864:653      | Cdh1       | INSIDE                 | 0.257                                           | 0.666                            | 1669.23             | 1111.30             | 0.171                            | 1176.17             | 201.07              |
| A_68_P26207422 | chr8:120807660-120807704                          | NM_019707:28       | Cdh13      | INSIDE                 | 0.403                                           | 0.463                            | 1396.49             | 647.17              | 0.187                            | 1115.55             | 208.39              |
| A_68_P26236513 | chr8:125394326-125394370                          | NM_007662:22075    | Cdh15      | DOWNSTREAM             | 0.265                                           | 1.798                            | 1979.57             | 3559.51             | 0.477                            | 1523.30             | 726.93              |
| A_68_P26236517 | chr8:125394810-125394862                          | NM_007662:22563    | Cdh15      | DOWNSTREAM             | 0.404                                           | 1.403                            | 1945.50             | 2728.65             | 0.566                            | 1315.85             | 745.01              |
| A_68_P31524846 | chr18:16966832-16966876                           | NM_007664:704      | Cdh2       | INSIDE                 | 0.661                                           | 0.602                            | 908.10              | 546.70              | 0.398                            | 793.88              | 315.98              |
| A_68_P20501014 | chr1:106890387-106890439                          | NM_011800:225017   | Cdh20      | INSIDE                 | 0.276                                           | 1.800                            | 766.92              | 1380.67             | 0.497                            | 673.52              | 334.64              |
| A_68_P21821717 | chr2:164938019-164938063                          | NM_174988:122197   | Cdh22      | INSIDE                 | 0.308                                           | 0.461                            | 1976.94             | 910.90              | 0.142                            | 1492.14             | 211.67              |
| A_68_P21822531 | chr2:165058849-165058897                          | NM_174988:1365     | Cdh22      | INSIDE                 | 0.233                                           | 0.655                            | 964.16              | 631.37              | 0.152                            | 775.00              | 118.13              |
| A_68_P21822534 | chr2:165059212-165059256                          | NM_174988:1003     | Cdh22      | INSIDE                 | 0.268                                           | 0.628                            | 812.47              | 510.25              | 0.168                            | 716.53              | 120.62              |
| A_68_P21822538 | chr2:165059682-165059726                          | NM_174988:533      | Cdh22      | INSIDE                 | 0.556                                           | 0.576                            | 2327.71             | 1341.58             | 0.320                            | 1922.96             | 615.69              |
| A_68_P27176087 | chr10:60148828-60148872                           | NM_023370:10388    | Cdh23      | INSIDE                 | 0.252                                           | 0.487                            | 1481.03             | 721.42              | 0.123                            | 1021.99             | 125.32              |

| ProbeName      | Target position of probe on CpG island microarray | TargetID          | GeneSymbol | CpG island Description | Ratio of relative methylation (TiO2-NP/Vehicle) | Sham group                       |                     |                     | TiO <sub>2</sub> -H group        |                     |                     |
|----------------|---------------------------------------------------|-------------------|------------|------------------------|-------------------------------------------------|----------------------------------|---------------------|---------------------|----------------------------------|---------------------|---------------------|
|                |                                                   |                   |            |                        |                                                 | Relative methylation (Cy-5/Cy-3) | Cy-3 signal (Input) | Cy-5 signal (MeDIP) | Relative methylation (Cy-5/Cy-3) | Cy-3 signal (Input) | Cy-5 signal (MeDIP) |
| A_68_P27176094 | chr10:60149519-60149563                           | NM_023370:9698    | Cdh23      | INSIDE                 | 0.458                                           | 0.684                            | 2090.96             | 1430.59             | 0.313                            | 1654.88             | 518.23              |
| A_68_P27176098 | chr10:60149935-60149979                           | NM_023370:9282    | Cdh23      | INSIDE                 | 0.330                                           | 0.642                            | 1312.10             | 842.19              | 0.212                            | 1070.71             | 226.74              |
| A_68_P27176102 | chr10:60150451-60150495                           | NM_023370:8766    | Cdh23      | INSIDE                 | 0.666                                           | 0.559                            | 970.33              | 542.53              | 0.373                            | 843.33              | 314.16              |
| A_68_P29613437 | chr14:55259966-55260010                           | NM_199470:213     | Cdh24      | INSIDE                 | 0.569                                           | 0.679                            | 3029.23             | 2055.85             | 0.386                            | 2450.58             | 945.95              |
| A_68_P26139991 | chr8:109031801-109031850                          | NM_007665:-2965   | Cdh3       | PROMOTER               | 0.237                                           | 0.584                            | 1016.71             | 593.83              | 0.138                            | 846.48              | 117.03              |
| A_68_P26140015 | chr8:109035666-109035710                          | NM_001037809:876  | Cdh3       | INSIDE                 | 0.305                                           | 0.590                            | 1353.51             | 798.17              | 0.180                            | 1129.42             | 203.15              |
| A_68_P30026215 | chr15:13103074-13103118                           | NM_007666:298     | Cdh6       | INSIDE                 | 0.650                                           | 0.710                            | 5232.29             | 3715.88             | 0.462                            | 3839.97             | 1773.12             |
| A_68_P30026217 | chr15:13103232-13103276                           | NM_007666:140     | Cdh6       | INSIDE                 | 0.391                                           | 0.672                            | 4209.50             | 2829.81             | 0.263                            | 2762.48             | 726.88              |
| A_68_P20522333 | chr1:111879695-111879739                          | NM_172853:-597    | Cdh7       | PROMOTER               | 0.549                                           | 0.625                            | 2362.99             | 1475.73             | 0.343                            | 1769.93             | 606.97              |
| A_68_P25503359 | chr7:134120190-134120234                          | NM_138754:311     | Cdipt      | INSIDE                 | 0.279                                           | 0.616                            | 881.62              | 542.65              | 0.172                            | 694.98              | 119.22              |
| A_68_P27223320 | chr10:68815779-68815823                           | NM_007659:-140    | Cdk1       | PROMOTER               | 0.415                                           | 0.495                            | 1876.26             | 927.88              | 0.205                            | 1570.55             | 321.96              |
| A_68_P26238593 | chr8:125749038-125749082                          | NM_194444:320     | Cdk10      | INSIDE                 | 0.556                                           | 0.520                            | 1983.84             | 1032.21             | 0.289                            | 1550.55             | 448.44              |
| A_68_P23439688 | chr4:154998849-154998893                          | NM_007661:-107    | Cdk11b     | PROMOTER               | 0.439                                           | 0.482                            | 1142.17             | 550.31              | 0.212                            | 905.93              | 191.67              |
| A_68_P23439689 | chr4:154998937-154998981                          | NM_007661:-19     | Cdk11b     | PROMOTER               | 0.272                                           | 0.528                            | 1003.84             | 529.90              | 0.144                            | 872.08              | 125.29              |
| A_68_P23455496 | chr5:5380045-5380094                              | NM_011074:182     | Cdk14      | INSIDE                 | 0.170                                           | 0.572                            | 1663.32             | 951.24              | 0.097                            | 1270.44             | 123.40              |
| A_68_P32289634 | chrX:20265458-20265502                            | NM_011049:-138    | Cdk16      | PROMOTER               | 0.152                                           | 1.369                            | 1922.20             | 2631.62             | 0.208                            | 800.76              | 166.60              |
| A_68_P20619646 | chr1:134035792-134035836                          | NM_008795:448     | Cdk18      | INSIDE                 | 0.302                                           | 0.491                            | 1523.18             | 748.63              | 0.149                            | 1239.82             | 184.16              |
| A_68_P27083518 | chr10:40068868-40068914                           | NM_001168304:-223 | Cdk19      | PROMOTER               | 0.234                                           | 0.416                            | 1580.29             | 658.15              | 0.097                            | 1201.49             | 116.90              |
| A_68_P27542784 | chr10:128141723-128141767                         | NM_016756:363     | Cdk2       | INSIDE                 | 0.429                                           | 0.608                            | 1592.16             | 968.65              | 0.261                            | 1257.00             | 327.89              |
| A_68_P27542787 | chr10:128142015-128142063                         | NM_016756:69      | Cdk2       | INSIDE                 | 0.230                                           | 0.446                            | 1582.07             | 705.57              | 0.102                            | 1206.47             | 123.58              |
| A_68_P31921019 | chr19:4097126-4097170                             | NM_026373:-202    | Cdk2ap2    | PROMOTER               | 0.579                                           | 0.598                            | 2421.43             | 1448.75             | 0.347                            | 1777.27             | 616.17              |
| A_68_P31921020 | chr19:4097226-4097270                             | NM_026373:-102    | Cdk2ap2    | PROMOTER               | 0.228                                           | 0.505                            | 3118.73             | 1573.89             | 0.115                            | 2145.91             | 246.50              |
| A_68_P27533815 | chr10:126500675-126500719                         | NM_009870:38      | Cdk4       | INSIDE                 | 0.584                                           | 0.617                            | 1119.52             | 690.68              | 0.360                            | 881.74              | 317.42              |
| A_68_P27533816 | chr10:126500794-126500838                         | NM_009870:158     | Cdk4       | INSIDE                 | 0.147                                           | 0.642                            | 1855.86             | 1191.82             | 0.095                            | 1239.12             | 117.31              |
| A_68_P23541721 | chr5:23929534-23929578                            | NM_007668:-208    | Cdk5       | DIVERGENT_PROMOTER     | 0.261                                           | 0.398                            | 1823.91             | 725.47              | 0.104                            | 1213.29             | 125.79              |
| A_68_P27954544 | chr11:80291421-80291465                           | NM_009871:895     | Cdk5r1     | INSIDE                 | 0.566                                           | 0.593                            | 1698.75             | 1008.11             | 0.336                            | 1220.56             | 409.99              |
| A_68_P20350882 | chr1:74902485-74902529                            | NM_009872:904     | Cdk5r2     | INSIDE                 | 0.449                                           | 0.526                            | 1585.72             | 834.75              | 0.236                            | 1345.40             | 317.89              |
| A_68_P20350884 | chr1:74902743-74902787                            | NM_009872:1162    | Cdk5r2     | INSIDE                 | 0.103                                           | 0.618                            | 2538.87             | 1568.75             | 0.064                            | 1872.97             | 119.36              |
| A_68_P23005993 | chr4:70071160-70071204                            | NM_145990:219     | Cdk5rap2   | INSIDE                 | 0.153                                           | 0.647                            | 5103.18             | 3300.01             | 0.099                            | 3635.49             | 359.90              |
| A_68_P23005994 | chr4:70071277-70071321                            | NM_145990:103     | Cdk5rap2   | INSIDE                 | 0.628                                           | 0.572                            | 1910.35             | 1093.22             | 0.360                            | 1466.55             | 527.45              |
| A_68_P23005998 | chr4:70071674-70071724                            | NM_145990:-297    | Cdk5rap2   | PROMOTER               | 0.237                                           | 0.622                            | 916.61              | 570.54              | 0.147                            | 803.27              | 118.31              |
| A_68_P28047526 | chr11:96777751-96777795                           | NM_030248:23      | Cdk5rap3   | INSIDE                 | 0.374                                           | 0.596                            | 1501.27             | 895.07              | 0.223                            | 1151.62             | 256.54              |
| A_68_P28047528 | chr11:96777981-96778025                           | NM_030248:-207    | Cdk5rap3   | PROMOTER               | 0.644                                           | 0.630                            | 1635.48             | 1030.65             | 0.406                            | 1163.80             | 471.95              |
| A_68_P24167402 | chr5:147042562-147042606                          | NM_153599:-666    | Cdk8       | DIVERGENT_PROMOTER     | 0.406                                           | 0.608                            | 1352.14             | 821.47              | 0.246                            | 1139.57             | 280.81              |
| A_68_P24167577 | chr5:147072524-147072578                          | NM_153599:29300   | Cdk8       | INSIDE                 | 0.628                                           | 3.728                            | 301.16              | 1122.79             | 2.340                            | 284.14              | 664.76              |
| A_68_P21117007 | chr2:32567836-32567880                            | NM_130860:446     | Cdk9       | INSIDE                 | 0.332                                           | 0.453                            | 2551.54             | 1156.85             | 0.151                            | 1980.24             | 298.43              |
| A_68_P31125919 | chr17:29230688-29230732                           | NM_007669:-6      | Cdkn1a     | PROMOTER               | 0.541                                           | 0.612                            | 2807.15             | 1719.38             | 0.331                            | 2049.09             | 678.77              |
| A_68_P31125922 | chr17:29231051-29231095                           | NM_007669:356     | Cdkn1a     | INSIDE                 | 0.341                                           | 0.568                            | 1745.25             | 992.08              | 0.194                            | 1261.12             | 244.16              |
| A_68_P31125923 | chr17:29231167-29231211                           | NM_007669:472     | Cdkn1a     | INSIDE                 | 0.256                                           | 0.468                            | 1219.23             | 570.02              | 0.120                            | 1002.53             | 119.97              |
| A_68_P31125924 | chr17:29231277-29231321                           | NM_007669:582     | Cdkn1a     | INSIDE                 | 0.192                                           | 0.368                            | 2451.01             | 903.09              | 0.071                            | 1773.09             | 125.40              |
| A_68_P31125930 | chr17:29232003-29232047                           | NM_007669:1308    | Cdkn1a     | INSIDE                 | 0.238                                           | 0.614                            | 2904.24             | 1782.82             | 0.146                            | 2167.87             | 316.25              |
| A_68_P24864239 | chr6:134871088-134871141                          | NM_009875:696     | Cdkn1b     | INSIDE                 | 0.183                                           | 0.513                            | 2205.53             | 1131.37             | 0.094                            | 1269.46             | 119.28              |
| A_68_P23094685 | chr4:88922650-88922694                            | NM_001040654:5424 | Cdkn2a     | INSIDE                 | 0.129                                           | 0.449                            | 2482.98             | 1113.76             | 0.058                            | 2022.74             | 117.38              |
| A_68_P23094686 | chr4:88922820-88922864                            | NM_001040654:5254 | Cdkn2a     | INSIDE                 | 0.321                                           | 0.573                            | 1402.32             | 803.61              | 0.184                            | 1077.56             | 197.99              |

| ProbeName      | Target position of probe on CpG island microarray | TargetID            | GeneSymbol | CpG island Description | Ratio of relative methylation (TiO2-NP/Vehicle) | Sham group                       |                     |                     | TiO <sub>2</sub> -H group        |                     |                     |
|----------------|---------------------------------------------------|---------------------|------------|------------------------|-------------------------------------------------|----------------------------------|---------------------|---------------------|----------------------------------|---------------------|---------------------|
|                |                                                   |                     |            |                        |                                                 | Relative methylation (Cy-5/Cy-3) | Cy-3 signal (Input) | Cy-5 signal (MeDIP) | Relative methylation (Cy-5/Cy-3) | Cy-3 signal (Input) | Cy-5 signal (MeDIP) |
| A_68_P23094814 | chr4:88941150-88941194                            | NM_009877:-649      | Cdkn2a     | PROMOTER               | 0.260                                           | 0.605                            | 1710.14             | 1034.46             | 0.157                            | 1371.20             | 215.88              |
| A_68_P25843135 | chr8:48798585-48798629                            | NM_172407:679       | Cdkn2aip   | INSIDE                 | 0.230                                           | 0.618                            | 1365.36             | 844.39              | 0.142                            | 989.25              | 140.46              |
| A_68_P25843138 | chr8:48798881-48798925                            | NM_172407:383       | Cdkn2aip   | INSIDE                 | 0.289                                           | 0.518                            | 1190.71             | 616.78              | 0.150                            | 980.32              | 146.98              |
| A_68_P25843141 | chr8:48799219-48799263                            | NM_172407:45        | Cdkn2aip   | INSIDE                 | 0.573                                           | 0.616                            | 3600.91             | 2218.30             | 0.353                            | 2750.15             | 970.19              |
| A_68_P27796702 | chr11:51781404-51781448                           | NM_029976:294       | Cdkn2aipnl | INSIDE                 | 0.640                                           | 0.453                            | 1411.50             | 638.77              | 0.290                            | 1139.71             | 330.17              |
| A_68_P23201931 | chr4:109330348-109330392                          | NM_007671:7607      | Cdkn2c     | DOWNSTREAM             | 0.410                                           | 0.428                            | 2457.97             | 1053.23             | 0.176                            | 2044.63             | 359.05              |
| A_68_P23202006 | chr4:109338923-109338967                          | NM_007671:-967      | Cdkn2c     | PROMOTER               | 0.443                                           | 0.593                            | 1474.25             | 874.55              | 0.263                            | 1226.01             | 322.23              |
| A_68_P23202007 | chr4:109339070-109339115                          | NM_007671:-1115     | Cdkn2c     | PROMOTER               | 0.590                                           | 0.689                            | 1117.88             | 770.49              | 0.407                            | 936.38              | 380.95              |
| A_68_P26346391 | chr9:21095271-21095315                            | NM_009878:361       | Cdkn2d     | INSIDE                 | 0.460                                           | 0.729                            | 2772.31             | 2022.37             | 0.336                            | 2033.06             | 682.14              |
| A_68_P31678446 | chr18:46887405-46887449                           | NM_033037:570       | Cdo1       | INSIDE                 | 0.600                                           | 0.570                            | 1542.13             | 879.69              | 0.342                            | 1208.86             | 413.91              |
| A_68_P31678447 | chr18:46887518-46887562                           | NM_033037:456       | Cdo1       | INSIDE                 | 0.261                                           | 0.746                            | 5411.06             | 4034.95             | 0.194                            | 3873.70             | 753.00              |
| A_68_P31678448 | chr18:46887631-46887675                           | NM_033037:344       | Cdo1       | INSIDE                 | 0.422                                           | 0.460                            | 2637.23             | 1212.62             | 0.194                            | 1900.31             | 368.93              |
| A_68_P25471450 | chr7:128125237-128125281                          | NM_007672:568       | Cdr2       | INSIDE                 | 0.597                                           | 0.664                            | 1492.75             | 990.68              | 0.396                            | 1161.96             | 460.64              |
| A_68_P28153161 | chr11:115243333-115243378                         | NM_001080929:126    | Cdr21      | INSIDE                 | 0.615                                           | 0.703                            | 1343.15             | 943.86              | 0.432                            | 1293.34             | 558.71              |
| A_68_P21639430 | chr2:132089195-132089239                          | NM_138651:224       | Cds2       | INSIDE                 | 0.666                                           | 0.568                            | 964.42              | 547.35              | 0.378                            | 782.88              | 295.74              |
| A_68_P21639431 | chr2:132089279-132089323                          | NM_138651:308       | Cds2       | INSIDE                 | 0.269                                           | 0.471                            | 2740.33             | 1290.68             | 0.127                            | 2096.93             | 265.86              |
| A_68_P21639432 | chr2:132089391-132089435                          | NM_138651:420       | Cds2       | INSIDE                 | 0.194                                           | 0.679                            | 2146.73             | 1458.04             | 0.132                            | 1708.67             | 225.09              |
| A_68_P26785468 | chr9:103266904-103266948                          | NM_001134427:383    | Cdv3       | INSIDE                 | 0.230                                           | 0.644                            | 2629.97             | 1694.11             | 0.148                            | 1895.91             | 280.58              |
| A_68_P24172962 | chr5:148115952-148116010                          | NM_007673:2845      | Cdx2       | INSIDE                 | 0.156                                           | 0.580                            | 1919.73             | 1113.43             | 0.091                            | 1311.99             | 118.90              |
| A_68_P24172965 | chr5:148116273-148116317                          | NM_007673:2531      | Cdx2       | INSIDE                 | 0.555                                           | 0.566                            | 1928.69             | 1091.83             | 0.314                            | 1504.76             | 472.42              |
| A_68_P24172980 | chr5:148117798-148117842                          | NM_007673:1005      | Cdx2       | INSIDE                 | 0.198                                           | 0.439                            | 1722.33             | 756.32              | 0.087                            | 1366.22             | 118.65              |
| A_68_P24995570 | chr7:20437597-20437641                            | NM_001033419:9030   | Ceacam16   | INSIDE                 | 0.138                                           | 0.716                            | 1584.42             | 1134.90             | 0.099                            | 1230.46             | 121.30              |
| A_68_P25047606 | chr7:35903706-35903750                            | NM_007678:-583      | Cebpa      | PROMOTER               | 0.110                                           | 0.681                            | 2602.76             | 1772.23             | 0.075                            | 1633.83             | 122.82              |
| A_68_P21836878 | chr2:167514004-167514048                          | NM_009883:-388      | Cebpb      | PROMOTER               | 0.416                                           | 0.532                            | 1435.24             | 763.87              | 0.221                            | 1226.46             | 271.50              |
| A_68_P30567432 | chr16:15887571-15887615                           | NM_007679:214       | Cebpd      | INSIDE                 | 0.612                                           | 0.562                            | 3420.96             | 1921.32             | 0.344                            | 2518.76             | 865.88              |
| A_68_P31374516 | chr17:79336106-79336150                           | NM_001024806:282    | Cebpz      | INSIDE                 | 0.520                                           | 0.672                            | 1013.10             | 681.20              | 0.350                            | 885.58              | 309.93              |
| A_68_P31374517 | chr17:79336211-79336255                           | NM_001024806:178    | Cebpz      | INSIDE                 | 0.228                                           | 0.527                            | 1260.97             | 664.02              | 0.120                            | 1009.35             | 121.04              |
| A_68_P24799552 | chr6:120615622-120615666                          | NM_001128151:-794   | Cecr2      | PROMOTER               | 0.403                                           | 0.603                            | 3552.63             | 2143.25             | 0.243                            | 2839.95             | 689.74              |
| A_68_P24799556 | chr6:120616027-120616071                          | NM_001128151:-390   | Cecr2      | PROMOTER               | 0.100                                           | 0.687                            | 3552.49             | 2441.58             | 0.069                            | 2449.23             | 167.96              |
| A_68_P24798989 | chr6:120481488-120481532                          | NM_144815:-193      | Cecr5      | PROMOTER               | 0.598                                           | 0.628                            | 1119.77             | 702.70              | 0.376                            | 763.89              | 286.89              |
| A_68_P24798990 | chr6:120481585-120481629                          | NM_144815:-289      | Cecr5      | PROMOTER               | 0.560                                           | 0.325                            | 1978.65             | 643.44              | 0.182                            | 1646.51             | 299.76              |
| A_68_P24798779 | chr6:120442774-120442818                          | NM_033567:1029      | Cecr6      | INSIDE                 | 0.285                                           | 0.473                            | 2029.78             | 960.77              | 0.135                            | 1580.40             | 213.41              |
| A_68_P24798783 | chr6:120443507-120443551                          | NM_033567:297       | Cecr6      | INSIDE                 | 0.481                                           | 0.454                            | 2166.85             | 982.79              | 0.218                            | 1678.62             | 366.17              |
| A_68_P31565720 | chr18:25645973-25646017                           | NM_001146292:266490 | Celf4      | INSIDE                 | 0.116                                           | 0.644                            | 2386.56             | 1537.11             | 0.075                            | 1600.31             | 119.46              |
| A_68_P31567781 | chr8:25913080-25913124                            | NM_001146292:-618   | Celf4      | PROMOTER               | 0.519                                           | 0.678                            | 1334.73             | 904.99              | 0.352                            | 1199.85             | 422.05              |
| A_68_P30404227 | chr15:85809018-85809063                           | NM_009886:55167     | Celsr1     | INSIDE                 | 0.591                                           | 2.968                            | 311.14              | 923.41              | 1.755                            | 375.22              | 658.46              |
| A_68_P26816838 | chr9:108728469-108728513                          | NM_080437:-160      | Celsr3     | PROMOTER               | 0.517                                           | 0.409                            | 3585.13             | 1465.05             | 0.211                            | 2717.36             | 574.18              |
| A_68_P26816846 | chr9:108729372-108729416                          | NM_080437:744       | Celsr3     | INSIDE                 | 0.199                                           | 0.521                            | 3449.92             | 1796.89             | 0.104                            | 2478.45             | 257.31              |
| A_68_P22550732 | chr3:134875583-134875627                          | NM_173762:78        | Cenpe      | INSIDE                 | 0.391                                           | 0.608                            | 1219.19             | 740.70              | 0.237                            | 914.46              | 216.97              |
| A_68_P22550733 | chr3:134875756-134875800                          | NM_173762:252       | Cenpe      | INSIDE                 | 0.649                                           | 0.648                            | 991.59              | 642.34              | 0.420                            | 773.26              | 324.99              |
| A_68_P29270035 | chr13:101545475-101545519                         | NM_021886:358       | Cenph      | INSIDE                 | 0.198                                           | 0.517                            | 3664.88             | 1893.96             | 0.103                            | 2523.96             | 258.79              |
| A_68_P29270037 | chr13:101545636-101545680                         | NM_021886:196       | Cenph      | INSIDE                 | 0.497                                           | 0.482                            | 1991.03             | 959.10              | 0.239                            | 1613.78             | 386.23              |
| A_68_P26199702 | chr8:119445672-119445716                          | NM_028131:55        | Cenpn      | INSIDE                 | 0.546                                           | 0.614                            | 949.24              | 582.54              | 0.335                            | 819.18              | 274.50              |
| A_68_P27854481 | chr11:62352177-62352221                           | NM_028448:565       | Cenpv      | INSIDE                 | 0.367                                           | 0.675                            | 1792.10             | 1209.72             | 0.248                            | 1317.70             | 326.44              |

| ProbeName      | Target position of probe on CpG island microarray | TargetID          | GeneSymbol | CpG island Description | Ratio of relative methylation (TiO2-NP/Vehicle) | Sham group                       |                     |                     | TiO <sub>2</sub> -H group        |                     |                     |
|----------------|---------------------------------------------------|-------------------|------------|------------------------|-------------------------------------------------|----------------------------------|---------------------|---------------------|----------------------------------|---------------------|---------------------|
|                |                                                   |                   |            |                        |                                                 | Relative methylation (Cy-5/Cy-3) | Cy-3 signal (Input) | Cy-5 signal (MeDIP) | Relative methylation (Cy-5/Cy-3) | Cy-3 signal (Input) | Cy-5 signal (MeDIP) |
| A_68_P21603779 | chr2:125450959-125451003                          | NM_001081091:-131 | Cep152     | PROMOTER               | 0.584                                           | 0.440                            | 1192.28             | 525.10              | 0.257                            | 954.54              | 245.33              |
| A_68_P26476239 | chr9:45636484-45636528                            | NM_001081373:215  | Cep164     | INSIDE                 | 0.419                                           | 0.600                            | 4238.47             | 2542.52             | 0.251                            | 2950.74             | 741.98              |
| A_68_P27392329 | chr10:99950462-99950506                           | NM_146009:-438    | Cep290     | DIVERGENT_PROMOTER     | 0.559                                           | 0.337                            | 1814.92             | 610.94              | 0.188                            | 1345.69             | 253.04              |
| A_68_P20740951 | chr1:157820596-157820640                          | NM_001039184:-233 | Cep350     | PROMOTER               | 0.608                                           | 0.675                            | 1368.22             | 923.57              | 0.410                            | 1014.32             | 416.26              |
| A_68_P32099201 | chr19:38129127-38129171                           | NM_028293:-366    | Cep55      | PROMOTER               | 0.275                                           | 1.940                            | 12468.12            | 24188.29            | 0.533                            | 7872.86             | 4194.58             |
| A_68_P32099207 | chr19:38129688-38129732                           | NM_001164362:179  | Cep55      | INSIDE                 | 0.486                                           | 0.558                            | 1634.87             | 912.57              | 0.271                            | 1289.73             | 349.94              |
| A_68_P26313776 | chr9:13631112-13631156                            | NR_037622:363     | Cep57      | INSIDE                 | 0.218                                           | 0.455                            | 1704.09             | 774.90              | 0.099                            | 1190.57             | 118.27              |
| A_68_P26313777 | chr9:13631232-13631276                            | NR_037622:243     | Cep57      | INSIDE                 | 0.407                                           | 0.486                            | 3391.82             | 1647.72             | 0.198                            | 2734.82             | 540.70              |
| A_68_P27630624 | chr11:20149666-20149710                           | NM_172260:-261    | Cep68      | PROMOTER               | 0.583                                           | 0.701                            | 1895.69             | 1328.52             | 0.409                            | 1310.85             | 535.75              |
| A_68_P31792968 | chr18:67800428-67800477                           | NM_001081073:538  | Cep76      | INSIDE                 | 0.172                                           | 0.670                            | 1353.59             | 906.32              | 0.115                            | 1046.08             | 120.56              |
| A_68_P31977523 | chr19:16058932-16058979                           | NM_198019:524     | Cep78      | INSIDE                 | 0.128                                           | 0.673                            | 1732.51             | 1166.79             | 0.086                            | 1360.79             | 117.39              |
| A_68_P30778447 | chr16:55933919-55933975                           | NM_028815:1015    | Cep97      | INSIDE                 | 0.222                                           | 0.440                            | 1614.04             | 710.87              | 0.098                            | 1224.26             | 119.86              |
| A_68_P30778452 | chr16:55934493-55934544                           | NM_028815:443     | Cep97      | INSIDE                 | 0.196                                           | 0.551                            | 1765.37             | 973.22              | 0.108                            | 1137.71             | 123.13              |
| A_68_P30778453 | chr16:55934660-55934704                           | NM_028815:279     | Cep97      | INSIDE                 | 0.323                                           | 0.616                            | 1514.17             | 932.49              | 0.199                            | 1096.48             | 218.02              |
| A_68_P30778320 | chr16:55905833-55905877                           | NM_028815:29107   | Cep97      | INSIDE                 | 0.670                                           | 2.862                            | 380.98              | 1090.21             | 1.918                            | 356.28              | 683.46              |
| A_68_P22402364 | chr3:106350168-106350212                          | NM_133869:489     | Cept1      | INSIDE                 | 0.350                                           | 0.711                            | 2349.11             | 1670.19             | 0.249                            | 1749.54             | 435.91              |
| A_68_P22402367 | chr3:106350620-106350664                          | NM_133869:37      | Cept1      | INSIDE                 | 0.195                                           | 0.590                            | 1253.08             | 739.59              | 0.115                            | 1042.28             | 120.12              |
| A_68_P30405649 | chrX:86015668-86015712                            | NM_145475:881     | Cerk       | INSIDE                 | 0.270                                           | 0.611                            | 952.62              | 582.38              | 0.165                            | 733.58              | 121.17              |
| A_68_P32459814 | chrX:70163539-70163583                            | NM_019405:123     | Cetn2      | INSIDE                 | 0.274                                           | 1.811                            | 1351.75             | 2447.48             | 0.496                            | 519.22              | 257.64              |
| A_68_P29177663 | chr13:81922129-81922187                           | NM_007684:-132    | Cetn3      | PROMOTER               | 0.266                                           | 0.526                            | 1070.28             | 563.33              | 0.140                            | 883.45              | 123.60              |
| A_68_P31929038 | chr19:5491024-5491068                             | NM_007687:592     | Cfl1       | INSIDE                 | 0.543                                           | 0.647                            | 1064.32             | 688.27              | 0.351                            | 871.14              | 306.02              |
| A_68_P28449508 | chr12:55963342-55963389                           | NM_007688:499     | Cfl2       | INSIDE                 | 0.372                                           | 0.613                            | 932.54              | 572.01              | 0.228                            | 691.92              | 157.95              |
| A_68_P28449511 | chr12:55963765-55963809                           | NM_007688:78      | Cfl2       | INSIDE                 | 0.654                                           | 0.440                            | 1716.52             | 755.81              | 0.288                            | 1482.68             | 426.90              |
| A_68_P30822062 | chr16:64851258-64851302                           | NM_178647:-630    | Cggbp1     | PROMOTER               | 0.404                                           | 0.519                            | 3183.58             | 1650.75             | 0.210                            | 2462.97             | 516.24              |
| A_68_P22340672 | chr3:94590209-94590253                            | NM_001037711:207  | Cgn        | INSIDE                 | 0.556                                           | 0.730                            | 1766.28             | 1288.82             | 0.406                            | 1252.38             | 508.07              |
| A_68_P22340673 | chr3:94590302-94590346                            | NM_001037711:113  | Cgn        | INSIDE                 | 0.566                                           | 0.543                            | 4165.07             | 2260.24             | 0.307                            | 3089.59             | 948.51              |
| A_68_P22340676 | chr3:94590702-94590746                            | NM_001037711:-287 | Cgn        | PROMOTER               | 0.283                                           | 0.421                            | 1390.08             | 584.89              | 0.119                            | 1001.79             | 119.45              |
| A_68_P21569217 | chr2:119176751-119176795                          | NM_026929:-205    | Chac1      | PROMOTER               | 0.183                                           | 0.519                            | 1593.16             | 826.99              | 0.095                            | 1215.22             | 115.31              |
| A_68_P21569219 | chr2:119176997-119177041                          | NM_026929:41      | Chac1      | INSIDE                 | 0.353                                           | 0.604                            | 2071.02             | 1251.04             | 0.213                            | 1652.42             | 352.12              |
| A_68_P31253494 | chr17:56179975-56180019                           | NM_013733:158     | Chaf1a     | INSIDE                 | 0.504                                           | 0.505                            | 1012.57             | 511.72              | 0.255                            | 732.23              | 186.66              |
| A_68_P30978142 | chr16:93884445-93884489                           | NM_028083:321     | Chaf1b     | INSIDE                 | 0.237                                           | 0.529                            | 2334.30             | 1234.14             | 0.126                            | 1707.44             | 214.36              |
| A_68_P24091083 | chr5:130363235-130363294                          | NM_024166:76      | Chchd2     | INSIDE                 | 0.218                                           | 0.527                            | 1457.36             | 767.87              | 0.115                            | 1093.40             | 125.35              |
| A_68_P24347496 | chr6:33009915-33009959                            | NM_025336:216     | Chchd3     | INSIDE                 | 0.190                                           | 0.685                            | 3361.95             | 2302.32             | 0.130                            | 2480.97             | 322.69              |
| A_68_P24347497 | chr6:33010009-33010053                            | NM_025336:122     | Chchd3     | INSIDE                 | 0.422                                           | 0.536                            | 1123.39             | 602.45              | 0.226                            | 879.35              | 198.89              |
| A_68_P24639203 | chr6:91422971-91423017                            | NM_133928:423     | Chchd4     | INSIDE                 | 0.603                                           | 0.611                            | 1014.68             | 619.91              | 0.368                            | 765.80              | 282.03              |
| A_68_P22695195 | chr4:3866261-3866305                              | NM_001190322:222  | Chchd7     | INSIDE                 | 0.236                                           | 0.518                            | 3915.50             | 2027.86             | 0.122                            | 2828.14             | 344.95              |
| A_68_P31066946 | chr17:15842783-15842827                           | NM_007690:874     | Chd1       | INSIDE                 | 0.307                                           | 0.495                            | 2613.42             | 1292.57             | 0.152                            | 1867.71             | 283.26              |
| A_68_P22355189 | chr3:97413826-97413870                            | NM_026539:265     | Chd11      | INSIDE                 | 0.249                                           | 0.549                            | 1079.94             | 592.37              | 0.137                            | 976.17              | 133.40              |
| A_68_P25229722 | chr7:80682604-80682648                            | NM_001081345:4006 | Chd2       | INSIDE                 | 0.197                                           | 0.581                            | 2332.22             | 1353.87             | 0.114                            | 1730.07             | 197.85              |
| A_68_P27894657 | chr11:69181886-69181930                           | NM_146019:1020    | Chd3       | INSIDE                 | 0.255                                           | 0.602                            | 1082.25             | 651.85              | 0.154                            | 781.56              | 120.11              |
| A_68_P27894658 | chr11:69182004-69182048                           | NM_146019:902     | Chd3       | INSIDE                 | 0.634                                           | 0.650                            | 2150.42             | 1398.55             | 0.413                            | 1538.82             | 634.86              |
| A_68_P24818639 | chr6:125046323-125046367                          | NM_145979:164     | Chd4       | INSIDE                 | 0.272                                           | 0.298                            | 2233.34             | 665.25              | 0.081                            | 1657.90             | 134.33              |
| A_68_P23418117 | chr4:151712690-151712736                          | NM_001081376:-47  | Chd5       | PROMOTER               | 0.315                                           | 0.338                            | 2320.97             | 783.66              | 0.106                            | 1837.66             | 195.40              |
| A_68_P21799027 | chr2:160935428-160935473                          | NM_173368:-658    | Chd6       | PROMOTER               | 0.564                                           | 0.682                            | 1001.83             | 682.95              | 0.385                            | 776.01              | 298.51              |

| ProbeName      | Target position of probe on CpG island microarray | TargetID          | GeneSymbol | CpG island Description | Ratio of relative methylation (TiO2-NP/Vehicle) | Sham group                       |                     |                     | TiO <sub>2</sub> -H group        |                     |                     |
|----------------|---------------------------------------------------|-------------------|------------|------------------------|-------------------------------------------------|----------------------------------|---------------------|---------------------|----------------------------------|---------------------|---------------------|
|                |                                                   |                   |            |                        |                                                 | Relative methylation (Cy-5/Cy-3) | Cy-3 signal (Input) | Cy-5 signal (MeDIP) | Relative methylation (Cy-5/Cy-3) | Cy-3 signal (Input) | Cy-5 signal (MeDIP) |
| A_68_P22715816 | chr4:8618846-8618890                              | NM_001081417:801  | Chd7       | INSIDE                 | 0.582                                           | 0.588                            | 1987.24             | 1168.28             | 0.342                            | 1535.90             | 525.41              |
| A_68_P22715818 | chr4:8619237-8619281                              | NM_001081417:1191 | Chd7       | INSIDE                 | 0.130                                           | 0.666                            | 1707.28             | 1136.37             | 0.086                            | 1404.23             | 121.23              |
| A_68_P26055734 | chr8:93431736-93431780                            | NM_177224:79025   | Chd9       | INSIDE                 | 0.365                                           | 0.516                            | 1586.60             | 818.66              | 0.188                            | 1265.60             | 238.22              |
| A_68_P26055745 | chr8:93433140-93433184                            | NM_177224:80429   | Chd9       | INSIDE                 | 0.358                                           | 0.393                            | 2705.33             | 1062.18             | 0.140                            | 2181.41             | 306.28              |
| A_68_P26426474 | chr9:36533941-36533985                            | NM_007691:281     | Chk1       | INSIDE                 | 0.498                                           | 0.617                            | 2866.35             | 1769.95             | 0.308                            | 2181.68             | 671.28              |
| A_68_P21642100 | chr2:132607157-132607201                          | NM_007694:165     | Chgb       | INSIDE                 | 0.192                                           | 0.591                            | 2294.98             | 1357.31             | 0.113                            | 1674.37             | 189.70              |
| A_68_P32572441 | chrX:100551713-100551757                          | NM_009767:-80     | Chic1      | PROMOTER               | 0.123                                           | 1.887                            | 3718.74             | 7015.74             | 0.232                            | 1422.98             | 329.87              |
| A_68_P23807021 | chr5:75440173-75440217                            | NM_028850:457     | Chic2      | INSIDE                 | 0.242                                           | 0.641                            | 857.81              | 549.48              | 0.155                            | 792.60              | 122.78              |
| A_68_P31919584 | chr19:3851556-3851600                             | NM_001025566:-194 | Chka       | PROMOTER               | 0.312                                           | 0.613                            | 1323.34             | 811.46              | 0.192                            | 939.48              | 179.98              |
| A_68_P31919590 | chr19:3852379-3852423                             | NM_001025566:628  | Chka       | INSIDE                 | 0.321                                           | 0.475                            | 1951.50             | 927.80              | 0.152                            | 1485.68             | 226.50              |
| A_68_P20849636 | chr1:177622240-177622284                          | NM_021350:-3778   | Chml       | PROMOTER               | 0.465                                           | 0.700                            | 3019.19             | 2114.39             | 0.325                            | 2048.46             | 666.65              |
| A_68_P20849637 | chr1:177622396-177622440                          | NM_021350:-3934   | Chml       | PROMOTER               | 0.409                                           | 0.736                            | 3272.00             | 2406.68             | 0.301                            | 2326.69             | 699.39              |
| A_68_P21761657 | chr2:154483014-154483064                          | NM_029362:277     | Chmp4b     | INSIDE                 | 0.333                                           | 0.640                            | 875.11              | 559.96              | 0.213                            | 680.46              | 145.10              |
| A_68_P21761658 | chr2:154483094-154483138                          | NM_029362:355     | Chmp4b     | INSIDE                 | 0.079                                           | 0.435                            | 4970.80             | 2162.56             | 0.034                            | 3535.80             | 121.94              |
| A_68_P21761659 | chr2:154483174-154483218                          | NM_029362:435     | Chmp4b     | INSIDE                 | 0.317                                           | 0.423                            | 1221.21             | 517.10              | 0.134                            | 874.38              | 117.31              |
| A_68_P21761660 | chr2:154483260-154483304                          | NM_029362:521     | Chmp4b     | INSIDE                 | 0.305                                           | 0.566                            | 1615.67             | 914.49              | 0.173                            | 1097.06             | 189.28              |
| A_68_P22859653 | chr4:40895771-40895815                            | NM_029814:207     | Chmp5      | INSIDE                 | 0.159                                           | 0.656                            | 2943.86             | 1930.79             | 0.104                            | 2197.19             | 228.71              |
| A_68_P26336205 | chr9:18096816-18096860                            | NM_025844:128     | Chordc1    | INSIDE                 | 0.306                                           | 0.710                            | 1483.02             | 1053.65             | 0.217                            | 1106.17             | 240.51              |
| A_68_P30328265 | chr15:72921187-72921231                           | NM_053068:367     | Chrac1     | INSIDE                 | 0.642                                           | 0.448                            | 1281.58             | 573.79              | 0.288                            | 1000.24             | 287.65              |
| A_68_P30589273 | chr16:20733395-20733439                           | NM_009893:217     | Chrd       | INSIDE                 | 0.535                                           | 0.496                            | 1500.39             | 744.75              | 0.265                            | 1252.52             | 332.43              |
| A_68_P30589275 | chr16:20733601-20733645                           | NM_009893:423     | Chrd       | INSIDE                 | 0.439                                           | 0.591                            | 1890.77             | 1118.12             | 0.260                            | 1433.01             | 372.01              |
| A_68_P30589277 | chr16:20733808-20733856                           | NM_009893:633     | Chrd       | INSIDE                 | 0.162                                           | 0.569                            | 1908.64             | 1086.20             | 0.092                            | 1314.14             | 121.00              |
| A_68_P21425362 | chr2:91761645-91761689                            | NM_007699:-679    | Chrm4      | PROMOTER               | 0.134                                           | 0.659                            | 2073.81             | 1367.59             | 0.088                            | 1417.75             | 124.99              |
| A_68_P21425363 | chr2:91761712-91761756                            | NM_007699:-611    | Chrm4      | PROMOTER               | 0.116                                           | 0.654                            | 2283.50             | 1493.54             | 0.076                            | 1559.52             | 118.08              |
| A_68_P21425364 | chr2:91761807-91761851                            | NM_007699:-517    | Chrm4      | PROMOTER               | 0.426                                           | 0.563                            | 1003.42             | 564.90              | 0.240                            | 792.85              | 190.09              |
| A_68_P21425372 | chr2:91762936-91762980                            | NM_007699:613     | Chrm4      | INSIDE                 | 0.454                                           | 0.711                            | 1921.16             | 1365.93             | 0.323                            | 1516.66             | 489.31              |
| A_68_P21425382 | chr2:91763987-91764031                            | NM_007699:1663    | Chrm4      | INSIDE                 | 0.206                                           | 0.561                            | 1302.41             | 730.67              | 0.116                            | 1165.03             | 134.91              |
| A_68_P27897126 | chr11:69609386-69609430                           | NM_009601:31      | Chrb1      | INSIDE                 | 0.512                                           | 0.661                            | 1292.68             | 854.96              | 0.338                            | 1008.82             | 341.48              |
| A_68_P21429513 | chr2:92440608-92440652                            | NM_023850:767     | Chst1      | INSIDE                 | 0.252                                           | 0.689                            | 1515.97             | 1044.00             | 0.173                            | 1107.85             | 192.14              |
| A_68_P24141722 | chr5:140981721-140981765                          | NM_021528:180     | Chst12     | INSIDE                 | 0.119                                           | 0.703                            | 2447.89             | 1721.20             | 0.083                            | 1826.94             | 152.43              |
| A_68_P24141811 | chr5:141000117-141000161                          | NM_021528:18576   | Chst12     | INSIDE                 | 0.628                                           | 3.118                            | 3628.19             | 11313.18            | 1.960                            | 2600.06             | 5095.03             |
| A_68_P25533789 | chr7:139508721-139508765                          | NM_029935:96      | Chst15     | INSIDE                 | 0.488                                           | 0.580                            | 1655.12             | 959.62              | 0.283                            | 1350.92             | 382.53              |
| A_68_P25533790 | chr7:139508854-139508902                          | NM_029935:-40     | Chst15     | PROMOTER               | 0.245                                           | 0.490                            | 1193.59             | 585.00              | 0.120                            | 1017.80             | 122.13              |
| A_68_P27172917 | chr10:59649185-59649231                           | NM_016803:32800   | Chst3      | INSIDE                 | 0.605                                           | 2.849                            | 1161.45             | 3308.62             | 1.725                            | 971.49              | 1675.68             |
| A_68_P27173114 | chr10:59681401-59681445                           | NM_016803:586     | Chst3      | INSIDE                 | 0.405                                           | 0.480                            | 1633.42             | 783.31              | 0.194                            | 1275.03             | 247.62              |
| A_68_P26170766 | chr8:114414003-114414047                          | NM_019950:20075   | Chst5      | INSIDE                 | 0.536                                           | 0.485                            | 2072.53             | 1004.22             | 0.260                            | 1651.10             | 429.15              |
| A_68_P26170767 | chr8:114414110-114414154                          | NM_019950:19967   | Chst5      | INSIDE                 | 0.181                                           | 0.495                            | 1585.65             | 784.79              | 0.090                            | 1403.18             | 125.96              |
| A_68_P26170772 | chr8:114414651-114414695                          | NM_019950:19427   | Chst5      | INSIDE                 | 0.454                                           | 1.456                            | 1248.02             | 1817.02             | 0.660                            | 1085.04             | 716.47              |
| A_68_P32287120 | chrX:19637562-19637606                            | NM_021715:889     | Chst7      | INSIDE                 | 0.238                                           | 1.576                            | 1428.99             | 2251.80             | 0.375                            | 622.90              | 233.31              |
| A_68_P32287127 | chrX:19638262-19638306                            | NM_021715:1589    | Chst7      | INSIDE                 | 0.171                                           | 1.581                            | 875.30              | 1383.85             | 0.271                            | 432.07              | 117.11              |
| A_68_P25044994 | chr7:35460266-35460310                            | NM_175140:137442  | Chst8      | INSIDE                 | 0.411                                           | 0.599                            | 1228.10             | 735.14              | 0.246                            | 994.25              | 244.50              |
| A_68_P25045001 | chr7:35460951-35460995                            | NM_175140:136758  | Chst8      | INSIDE                 | 0.186                                           | 0.663                            | 1687.40             | 1119.33             | 0.123                            | 1184.68             | 145.82              |
| A_68_P25045002 | chr7:35461038-35461082                            | NM_175140:136670  | Chst8      | INSIDE                 | 0.140                                           | 0.684                            | 1690.55             | 1156.88             | 0.096                            | 1216.16             | 116.90              |
| A_68_P25045003 | chr7:35461137-35461181                            | NM_175140:136572  | Chst8      | INSIDE                 | 0.566                                           | 0.593                            | 1404.10             | 832.32              | 0.336                            | 1336.94             | 448.61              |

| ProbeName      | Target position of probe on CpG island microarray | TargetID          | GeneSymbol | CpG island Description | Ratio of relative methylation (TiO2-NP/Vehicle) | Sham group                       |                     |                     | TiO <sub>2</sub> -H group        |                     |                     |
|----------------|---------------------------------------------------|-------------------|------------|------------------------|-------------------------------------------------|----------------------------------|---------------------|---------------------|----------------------------------|---------------------|---------------------|
|                |                                                   |                   |            |                        |                                                 | Relative methylation (Cy-5/Cy-3) | Cy-3 signal (Input) | Cy-5 signal (MeDIP) | Relative methylation (Cy-5/Cy-3) | Cy-3 signal (Input) | Cy-5 signal (MeDIP) |
| A_68_P25045779 | chr7:35597123-35597172                            | NM_175140:583     | Chst8      | INSIDE                 | 0.062                                           | 0.700                            | 3530.48             | 2471.14             | 0.043                            | 2796.11             | 121.54              |
| A_68_P25045781 | chr7:35597428-35597472                            | NM_175140:280     | Chst8      | INSIDE                 | 0.279                                           | 0.726                            | 2068.81             | 1501.84             | 0.203                            | 1430.67             | 290.07              |
| A_68_P31746196 | chr18:59334709-59334753                           | NM_001081328:-263 | Chsy3      | PROMOTER               | 0.639                                           | 0.574                            | 2107.12             | 1208.92             | 0.366                            | 1680.18             | 615.52              |
| A_68_P31746205 | chr18:59335935-59335979                           | NM_001081328:963  | Chsy3      | INSIDE                 | 0.146                                           | 0.590                            | 2367.87             | 1397.88             | 0.086                            | 1681.82             | 144.95              |
| A_68_P32130472 | chr19:44181487-44181534                           | NM_001162410:457  | Chuk       | INSIDE                 | 0.288                                           | 1.567                            | 5209.02             | 8160.95             | 0.451                            | 3712.27             | 1672.88             |
| A_68_P28555790 | chr12:77866473-77866523                           | NM_206534:-61     | Churc1     | PROMOTER               | 0.227                                           | 0.538                            | 1321.97             | 711.28              | 0.122                            | 1081.85             | 132.15              |
| A_68_P28555792 | chr12:77866643-77866687                           | NM_206534:105     | Churc1     | INSIDE                 | 0.221                                           | 0.540                            | 1305.10             | 705.30              | 0.119                            | 1024.00             | 122.33              |
| A_68_P21612302 | chr2:127073420-127073472                          | NM_025296:106     | Ciao1      | INSIDE                 | 0.130                                           | 0.530                            | 2767.80             | 1465.57             | 0.069                            | 1905.78             | 130.69              |
| A_68_P25265479 | chr7:87377398-87377442                            | NM_011870:82      | Cib1       | INSIDE                 | 0.539                                           | 0.608                            | 4253.81             | 2587.49             | 0.328                            | 3241.80             | 1062.18             |
| A_68_P25265480 | chr7:87377466-87377510                            | NM_011870:14      | Cib1       | INSIDE                 | 0.461                                           | 0.745                            | 3446.33             | 2567.13             | 0.344                            | 2908.06             | 999.31              |
| A_68_P25009415 | chr7:26066798-26066842                            | NM_001110131:-377 | Cic        | PROMOTER               | 0.247                                           | 0.707                            | 2165.51             | 1531.25             | 0.174                            | 1462.29             | 255.03              |
| A_68_P31791362 | chr18:67503417-67503461                           | NM_007702:221     | Cidea      | INSIDE                 | 0.147                                           | 0.750                            | 6607.30             | 4956.51             | 0.111                            | 4295.64             | 475.23              |
| A_68_P25948511 | chr8:72409941-72409985                            | NM_026818:1329    | Cilp2      | INSIDE                 | 0.480                                           | 0.526                            | 1118.11             | 587.97              | 0.253                            | 865.18              | 218.55              |
| A_68_P25948512 | chr8:72410079-72410123                            | NM_026818:1191    | Cilp2      | INSIDE                 | 0.654                                           | 0.443                            | 2700.09             | 1196.23             | 0.290                            | 1845.91             | 535.14              |
| A_68_P25948513 | chr8:72410234-72410278                            | NM_026818:1035    | Cilp2      | INSIDE                 | 0.270                                           | 0.530                            | 1079.67             | 572.66              | 0.143                            | 809.33              | 115.87              |
| A_68_P25948520 | chr8:72411249-72411293                            | NM_026818:21      | Cilp2      | INSIDE                 | 0.150                                           | 0.690                            | 2370.82             | 1636.94             | 0.104                            | 1680.64             | 174.26              |
| A_68_P25948527 | chr8:72412099-72412143                            | NM_026818:-829    | Cilp2      | PROMOTER               | 0.494                                           | 0.726                            | 1619.68             | 1176.51             | 0.359                            | 1040.00             | 372.95              |
| A_68_P25948535 | chr8:72413120-72413164                            | NM_026818:-1851   | Cilp2      | PROMOTER               | 0.597                                           | 0.479                            | 1235.17             | 591.11              | 0.286                            | 957.46              | 273.46              |
| A_68_P25948536 | chr8:72413250-72413294                            | NM_026818:-1981   | Cilp2      | PROMOTER               | 0.375                                           | 0.550                            | 2940.27             | 1616.09             | 0.206                            | 2203.60             | 454.36              |
| A_68_P27281378 | chr10:79622976-79623020                           | NM_007705:-7587   | Cirbp      | PROMOTER               | 0.257                                           | 0.342                            | 1867.22             | 638.63              | 0.088                            | 1413.73             | 124.08              |
| A_68_P27281431 | chr10:79630462-79630506                           | NM_007705:-101    | Cirbp      | PROMOTER               | 0.151                                           | 0.509                            | 2366.89             | 1205.70             | 0.077                            | 1611.98             | 123.75              |
| A_68_P26141981 | chr8:109417694-109417738                          | NM_011574:177     | Cirh1a     | INSIDE                 | 0.336                                           | 0.719                            | 1877.59             | 1350.27             | 0.241                            | 1458.53             | 352.21              |
| A_68_P32567796 | chrX:99445717-99445761                            | NM_007709:1370    | Cited1     | INSIDE                 | 0.171                                           | 1.639                            | 980.81              | 1607.14             | 0.281                            | 426.80              | 119.91              |
| A_68_P32567807 | chrX:99447270-99447325                            | NM_007709:-189    | Cited1     | PROMOTER               | 0.113                                           | 1.565                            | 1595.09             | 2496.11             | 0.177                            | 687.09              | 121.34              |
| A_68_P26971597 | chr10:17443088-17443132                           | NM_010828:77      | Cited2     | INSIDE                 | 0.092                                           | 0.727                            | 4990.73             | 3629.41             | 0.067                            | 3467.83             | 230.99              |
| A_68_P26971602 | chr10:17443634-17443678                           | NM_010828:623     | Cited2     | INSIDE                 | 0.432                                           | 0.712                            | 3830.13             | 2727.47             | 0.307                            | 2974.75             | 914.53              |
| A_68_P26971606 | chr10:17444088-17444133                           | NM_010828:1077    | Cited2     | INSIDE                 | 0.600                                           | 0.664                            | 1726.83             | 1146.50             | 0.398                            | 1241.37             | 494.69              |
| A_68_P21114932 | chr2:32218910-32218958                            | NM_028412:181     | Ciz1       | INSIDE                 | 0.158                                           | 2.241                            | 636.64              | 1426.73             | 0.354                            | 398.04              | 141.03              |
| A_68_P21580444 | chr2:121181215-121181259                          | NM_009897:-3140   | Ckmt1      | DIVERGENT_PROMOTER     | 0.434                                           | 0.461                            | 1306.01             | 601.82              | 0.200                            | 1063.72             | 212.59              |
| A_68_P22319259 | chr3:89221857-89221906                            | NM_016904:332     | Cks1b      | INSIDE                 | 0.165                                           | 1.891                            | 3058.36             | 5784.20             | 0.312                            | 2099.25             | 654.19              |
| A_68_P22319260 | chr3:89222015-89222059                            | NM_016904:177     | Cks1b      | INSIDE                 | 0.183                                           | 1.871                            | 3134.04             | 5864.79             | 0.343                            | 2010.64             | 689.92              |
| A_68_P29033454 | chr13:51740459-51740503                           | NM_025415:-120    | Cks2       | PROMOTER               | 0.248                                           | 0.666                            | 2797.00             | 1862.94             | 0.165                            | 1960.06             | 323.12              |
| A_68_P29033460 | chr13:51741130-51741185                           | NM_025415:557     | Cks2       | INSIDE                 | 0.162                                           | 0.568                            | 1872.70             | 1063.29             | 0.092                            | 1323.90             | 121.98              |
| A_68_P20551449 | chr1:120285275-120285326                          | NM_001081276:-334 | Clasp1     | PROMOTER               | 0.275                                           | 0.560                            | 1224.74             | 686.25              | 0.154                            | 880.76              | 135.94              |
| A_68_P20551457 | chr1:120286262-120286306                          | NM_001081276:650  | Clasp1     | INSIDE                 | 0.363                                           | 0.575                            | 2595.78             | 1492.91             | 0.209                            | 2048.58             | 427.43              |
| A_68_P20551458 | chr1:120286341-120286385                          | NM_001081276:728  | Clasp1     | INSIDE                 | 0.215                                           | 0.601                            | 1367.14             | 821.79              | 0.129                            | 1065.48             | 137.92              |
| A_68_P24994312 | chr7:20189858-20189902                            | NM_016680:-63     | Clasrp     | PROMOTER               | 0.274                                           | 0.537                            | 1872.87             | 1006.07             | 0.147                            | 1489.84             | 219.38              |
| A_68_P22413865 | chr3:108456942-108456986                          | NM_001177770:57   | Clcc1      | INSIDE                 | 0.651                                           | 0.330                            | 1817.88             | 600.02              | 0.215                            | 1674.97             | 360.17              |
| A_68_P31921845 | chr19:4215539-4215583                             | NM_019952:1169    | Clcf1      | INSIDE                 | 0.368                                           | 0.459                            | 4158.15             | 1906.85             | 0.169                            | 3338.13             | 563.15              |
| A_68_P30589167 | chr16:20716459-20716503                           | NM_009900:229     | Clcn2      | INSIDE                 | 0.453                                           | 0.662                            | 2648.65             | 1752.21             | 0.299                            | 2376.23             | 711.54              |
| A_68_P30589168 | chr16:20716549-20716593                           | NM_009900:139     | Clcn2      | INSIDE                 | 0.152                                           | 0.551                            | 1863.85             | 1027.07             | 0.084                            | 1407.81             | 118.24              |
| A_68_P29941246 | chr14:119254241-119254285                         | NM_001160099:91   | Cldn10     | INSIDE                 | 0.561                                           | 0.580                            | 1588.08             | 921.60              | 0.325                            | 1242.28             | 404.29              |
| A_68_P25782090 | chr8:36889097-36889141                            | NM_027998:495     | Cldn23     | INSIDE                 | 0.431                                           | 0.540                            | 1860.05             | 1004.54             | 0.233                            | 1281.82             | 298.48              |
| A_68_P25782095 | chr8:36889705-36889749                            | NM_027998:-113    | Cldn23     | PROMOTER               | 0.240                                           | 0.662                            | 5066.24             | 3353.75             | 0.159                            | 3789.35             | 601.43              |

| ProbeName      | Target position of probe on CpG island microarray | TargetID          | GeneSymbol | CpG island Description | Ratio of relative methylation (TiO2-NP/Vehicle) | Sham group                       |                     |                     | TiO <sub>2</sub> -H group        |                     |                     |
|----------------|---------------------------------------------------|-------------------|------------|------------------------|-------------------------------------------------|----------------------------------|---------------------|---------------------|----------------------------------|---------------------|---------------------|
|                |                                                   |                   |            |                        |                                                 | Relative methylation (Cy-5/Cy-3) | Cy-3 signal (Input) | Cy-5 signal (MeDIP) | Relative methylation (Cy-5/Cy-3) | Cy-3 signal (Input) | Cy-5 signal (MeDIP) |
| A_68_P30532560 | chr16:8424805-8424849                             | NM_029070:403     | Cldn26     | INSIDE                 | 0.626                                           | 0.568                            | 1407.49             | 799.30              | 0.356                            | 1205.20             | 428.55              |
| A_68_P30532562 | chr16:8424938-8424982                             | NM_029070:269     | Cldn26     | INSIDE                 | 0.277                                           | 0.705                            | 2714.55             | 1914.14             | 0.196                            | 2026.78             | 396.46              |
| A_68_P24114165 | chr5:135462201-135462245                          | NM_009902:139     | Cldn3      | INSIDE                 | 0.278                                           | 0.363                            | 1646.86             | 597.77              | 0.101                            | 1284.66             | 129.85              |
| A_68_P30793143 | chr16:58728472-58728525                           | NM_171826:342     | Cldnd1     | INSIDE                 | 0.291                                           | 0.516                            | 1065.71             | 549.69              | 0.150                            | 790.94              | 118.52              |
| A_68_P25086654 | chr7:51559898-51559942                            | NM_009131:2409    | Clec11a    | INSIDE                 | 0.282                                           | 0.664                            | 848.05              | 563.18              | 0.187                            | 640.56              | 119.90              |
| A_68_P25086655 | chr7:51560012-51560056                            | NM_009131:2295    | Clec11a    | INSIDE                 | 0.564                                           | 0.584                            | 1693.26             | 988.26              | 0.329                            | 1372.86             | 451.94              |
| A_68_P31193443 | chr17:44325522-44325566                           | NM_172621:24      | Clic5      | INSIDE                 | 0.615                                           | 0.487                            | 1461.95             | 711.75              | 0.299                            | 1172.02             | 350.96              |
| A_68_P24057000 | chr5:124133425-124133474                          | NM_019765:851     | Clip1      | INSIDE                 | 0.154                                           | 0.570                            | 1792.18             | 1020.80             | 0.088                            | 1374.02             | 120.69              |
| A_68_P22317612 | chr3:88972806-88972850                            | NM_001163432:4102 | Clk2       | INSIDE                 | 0.543                                           | 1.357                            | 5688.68             | 7717.31             | 0.736                            | 4168.93             | 3069.01             |
| A_68_P26543677 | chr9:57612772-57612816                            | NM_007713:873     | Clk3       | INSIDE                 | 0.256                                           | 0.710                            | 2611.59             | 1853.39             | 0.182                            | 2075.87             | 377.17              |
| A_68_P26543684 | chr9:57613558-57613602                            | NM_007713:87      | Clk3       | INSIDE                 | 0.225                                           | 0.523                            | 1385.99             | 724.53              | 0.118                            | 1029.36             | 121.22              |
| A_68_P26543685 | chr9:57613651-57613695                            | NM_007713:-5      | Clk3       | PROMOTER               | 0.366                                           | 0.424                            | 2415.65             | 1025.21             | 0.155                            | 1907.78             | 296.45              |
| A_68_P27792932 | chr11:51076708-51076752                           | NM_007714:58      | Clk4       | INSIDE                 | 0.254                                           | 0.692                            | 2234.37             | 1546.28             | 0.175                            | 1465.41             | 257.09              |
| A_68_P25351869 | chr7:104845090-104845134                          | NM_023671:-88     | Clns1a     | PROMOTER               | 0.186                                           | 0.648                            | 1149.10             | 745.08              | 0.120                            | 978.81              | 117.90              |
| A_68_P31259429 | chr17:57129711-57129755                           | NM_017393:46      | Clpp       | INSIDE                 | 0.065                                           | 1.638                            | 5541.89             | 9077.77             | 0.106                            | 3565.52             | 378.50              |
| A_68_P31259430 | chr17:57129793-57129837                           | NM_017393:128     | Clpp       | INSIDE                 | 0.042                                           | 1.585                            | 6366.32             | 10088.04            | 0.067                            | 3872.02             | 259.37              |
| A_68_P31259431 | chr17:57129908-57129952                           | NM_017393:244     | Clpp       | INSIDE                 | 0.215                                           | 0.600                            | 1560.12             | 935.58              | 0.129                            | 1124.24             | 144.91              |
| A_68_P31259432 | chr17:57130046-57130090                           | NM_017393:382     | Clpp       | INSIDE                 | 0.268                                           | 0.612                            | 979.87              | 599.61              | 0.164                            | 764.50              | 125.31              |
| A_68_P26586895 | chr9:65142202-65142246                            | NM_001044389:123  | Clpx       | INSIDE                 | 0.610                                           | 0.495                            | 1320.21             | 653.66              | 0.302                            | 993.50              | 300.26              |
| A_68_P26586898 | chr9:65142471-65142515                            | NM_001044389:391  | Clpx       | INSIDE                 | 0.221                                           | 0.483                            | 1308.51             | 632.29              | 0.107                            | 1136.13             | 121.45              |
| A_68_P23401325 | chr4:148960914-148960958                          | NM_023051:190     | Clistn1    | INSIDE                 | 0.215                                           | 0.624                            | 4047.49             | 2524.53             | 0.134                            | 3361.42             | 450.60              |
| A_68_P23401327 | chr4:148961132-148961176                          | NM_023051:408     | Clistn1    | INSIDE                 | 0.065                                           | 0.743                            | 3944.35             | 2928.84             | 0.049                            | 2517.93             | 122.15              |
| A_68_P23401328 | chr4:148961215-148961259                          | NM_023051:490     | Clistn1    | INSIDE                 | 0.114                                           | 1.709                            | 9352.64             | 15982.37            | 0.195                            | 6029.65             | 1178.52             |
| A_68_P23401329 | chr4:148961308-148961352                          | NM_023051:584     | Clistn1    | INSIDE                 | 0.236                                           | 1.777                            | 8284.43             | 14721.64            | 0.420                            | 5276.83             | 2216.45             |
| A_68_P22874797 | chr4:44025966-44026010                            | NM_001080384:474  | Clta       | INSIDE                 | 0.271                                           | 0.611                            | 872.51              | 533.24              | 0.165                            | 728.24              | 120.40              |
| A_68_P22874798 | chr4:44026078-44026122                            | NM_001080384:586  | Clta       | INSIDE                 | 0.142                                           | 0.594                            | 3563.10             | 2116.44             | 0.084                            | 2508.59             | 211.54              |
| A_68_P27990834 | chr11:86571018-86571062                           | NM_001003908:46   | Cltc       | PROMOTER               | 0.307                                           | 0.544                            | 3606.28             | 1963.38             | 0.167                            | 2688.21             | 449.14              |
| A_68_P23222740 | chr4:114659326-114659370                          | NM_025647:485     | Cmpk1      | INSIDE                 | 0.472                                           | 0.487                            | 1647.80             | 802.03              | 0.230                            | 1205.52             | 276.76              |
| A_68_P23222744 | chr4:114659711-114659755                          | NM_025647:101     | Cmpk1      | INSIDE                 | 0.554                                           | 0.469                            | 2116.44             | 992.63              | 0.260                            | 1720.59             | 446.81              |
| A_68_P28302020 | chr12:27154103-27154147                           | NM_020557:45      | Cmpk2      | INSIDE                 | 0.359                                           | 0.521                            | 1941.54             | 1011.62             | 0.187                            | 1587.41             | 297.21              |
| A_68_P26127989 | chr8:106864528-106864572                          | NM_024217:57      | Cmtm3      | INSIDE                 | 0.531                                           | 3.567                            | 2705.88             | 9651.50             | 1.893                            | 1636.22             | 3097.11             |
| A_68_P26846411 | chr9:114690663-114690707                          | NM_133978:263     | Cmtm7      | INSIDE                 | 0.260                                           | 0.610                            | 3026.72             | 1847.42             | 0.159                            | 2275.93             | 361.86              |
| A_68_P26846738 | chr9:114752895-114752940                          | NM_027294:353     | Cmtm8      | INSIDE                 | 0.224                                           | 0.402                            | 2429.36             | 977.79              | 0.090                            | 1935.55             | 174.75              |
| A_68_P20880981 | chr1:183282461-183282505                          | NM_001160211:-276 | Cnih3      | PROMOTER               | 0.191                                           | 0.578                            | 1375.16             | 795.22              | 0.111                            | 1102.05             | 121.91              |
| A_68_P27280209 | chr10:79451266-79451310                           | NM_007725:-56     | Cnn2       | DIVERGENT_PROMOTER     | 0.600                                           | 0.498                            | 1202.49             | 598.45              | 0.299                            | 900.74              | 269.17              |
| A_68_P27280212 | chr10:79451564-79451608                           | NM_007725:242     | Cnn2       | INSIDE                 | 0.232                                           | 0.650                            | 3682.96             | 2393.12             | 0.151                            | 2593.38             | 391.22              |
| A_68_P22476389 | chr3:121130415-121130465                          | NM_028044:982     | Cnn3       | INSIDE                 | 0.347                                           | 0.478                            | 2206.32             | 1053.53             | 0.166                            | 1572.16             | 260.25              |
| A_68_P32145753 | chr19:46835804-46835848                           | NM_001102471:-272 | Cnnm2      | PROMOTER               | 0.192                                           | 0.536                            | 4318.38             | 2316.11             | 0.103                            | 3203.51             | 330.69              |
| A_68_P32145754 | chr19:46835869-46835913                           | NM_001102471:-208 | Cnnm2      | PROMOTER               | 0.128                                           | 0.596                            | 2133.60             | 1271.49             | 0.076                            | 1611.46             | 123.22              |
| A_68_P32145760 | chr19:46836584-46836628                           | NM_001102471:508  | Cnnm2      | INSIDE                 | 0.543                                           | 0.449                            | 2306.30             | 1035.74             | 0.244                            | 1821.43             | 444.46              |
| A_68_P32145764 | chr19:46837127-46837172                           | NM_001102471:1051 | Cnnm2      | INSIDE                 | 0.353                                           | 0.643                            | 939.54              | 603.88              | 0.227                            | 684.27              | 155.44              |
| A_68_P20148456 | chr1:36528653-36528697                            | NM_033570:233     | Cnnm4      | INSIDE                 | 0.184                                           | 0.572                            | 1630.07             | 932.58              | 0.105                            | 1172.89             | 123.35              |
| A_68_P20148457 | chr1:36528751-36528795                            | NM_033570:331     | Cnnm4      | INSIDE                 | 0.422                                           | 0.482                            | 2547.50             | 1228.37             | 0.203                            | 1966.77             | 399.81              |
| A_68_P23609440 | chr5:37139337-37139381                            | NM_133724:560     | Cno        | INSIDE                 | 0.389                                           | 0.426                            | 1673.18             | 712.55              | 0.166                            | 1430.27             | 236.80              |

| ProbeName      | Target position of probe on CpG island microarray | TargetID          | GeneSymbol | CpG island Description | Ratio of relative methylation (TiO2-NP/Vehicle) | Sham group                       |                     |                     | TiO <sub>2</sub> -H group        |                     |                     |
|----------------|---------------------------------------------------|-------------------|------------|------------------------|-------------------------------------------------|----------------------------------|---------------------|---------------------|----------------------------------|---------------------|---------------------|
|                |                                                   |                   |            |                        |                                                 | Relative methylation (Cy-5/Cy-3) | Cy-3 signal (Input) | Cy-5 signal (MeDIP) | Relative methylation (Cy-5/Cy-3) | Cy-3 signal (Input) | Cy-5 signal (MeDIP) |
| A_68_P26085416 | chr8:98331248-98331292                            | NM_001205226:92   | Cnot1      | INSIDE                 | 0.392                                           | 0.403                            | 2325.01             | 938.12              | 0.158                            | 1832.93             | 289.72              |
| A_68_P26085422 | chr8:98331940-98331984                            | NM_001205226:-600 | Cnot1      | PROMOTER               | 0.278                                           | 0.722                            | 1947.02             | 1405.60             | 0.201                            | 1396.11             | 280.41              |
| A_68_P24359958 | chr6:35083871-35083915                            | NM_001164412:-155 | Cnot4      | PROMOTER               | 0.286                                           | 0.570                            | 1444.44             | 823.65              | 0.163                            | 1111.87             | 181.03              |
| A_68_P24359961 | chr6:35084163-35084220                            | NM_001164412:-454 | Cnot4      | PROMOTER               | 0.152                                           | 0.699                            | 1378.85             | 964.29              | 0.106                            | 1083.88             | 115.12              |
| A_68_P23904976 | chr5:96591506-96591557                            | NM_144910:-522    | Cnot6l     | PROMOTER               | 0.222                                           | 1.477                            | 2018.15             | 2981.57             | 0.329                            | 1455.09             | 478.23              |
| A_68_P27540747 | chr10:127759432-127759482                         | NM_019953:-58     | Cnpy2      | PROMOTER               | 0.244                                           | 0.628                            | 955.92              | 600.68              | 0.153                            | 772.39              | 118.43              |
| A_68_P22829261 | chr4:34010768-34010823                            | NM_007726:-811    | Cnr1       | PROMOTER               | 0.255                                           | 0.574                            | 1125.72             | 646.46              | 0.147                            | 878.96              | 128.87              |
| A_68_P27894312 | chr11:69137170-69137214                           | NM_172560:183     | Cntrob     | INSIDE                 | 0.613                                           | 0.477                            | 1808.54             | 863.43              | 0.293                            | 1303.35             | 381.55              |
| A_68_P28071818 | chr11:100943909-100943954                         | NM_027896:-7      | Coasy      | PROMOTER               | 0.525                                           | 0.618                            | 1182.11             | 730.56              | 0.324                            | 784.20              | 254.46              |
| A_68_P21070567 | chr2:25066910-25066954                            | NM_021393:77      | Cobra1     | INSIDE                 | 0.587                                           | 0.613                            | 2930.85             | 1797.52             | 0.360                            | 2259.95             | 813.56              |
| A_68_P28430601 | chr12:52695077-52695121                           | NM_001198835:771  | Coch       | INSIDE                 | 0.414                                           | 0.570                            | 1734.46             | 988.83              | 0.236                            | 1303.88             | 307.67              |
| A_68_P28143204 | chr11:113511459-113511505                         | NM_013581:640     | Cog1       | INSIDE                 | 0.306                                           | 0.631                            | 855.45              | 539.61              | 0.193                            | 733.34              | 141.68              |
| A_68_P28332516 | chr12:32339734-32339779                           | NM_001163126:23   | Cog5       | INSIDE                 | 0.324                                           | 0.516                            | 1819.70             | 938.79              | 0.167                            | 1454.03             | 243.41              |
| A_68_P26665706 | chr9:79566930-79566982                            | NM_007730:-471    | Col12a1    | PROMOTER               | 0.139                                           | 0.578                            | 1800.42             | 1040.62             | 0.080                            | 1449.70             | 116.37              |
| A_68_P26665710 | chr9:79567360-79567404                            | NM_007730:-897    | Col12a1    | PROMOTER               | 0.315                                           | 0.698                            | 2718.00             | 1897.60             | 0.220                            | 2040.62             | 448.42              |
| A_68_P26665705 | chr9:79566838-79566882                            | NM_007730:-375    | Col12a1    | PROMOTER               | 0.668                                           | 0.695                            | 3230.21             | 2245.78             | 0.464                            | 2319.51             | 1077.35             |
| A_68_P27183505 | chr10:61441491-61441535                           | NM_007731:344     | Col13a1    | INSIDE                 | 0.289                                           | 0.464                            | 1189.96             | 552.60              | 0.134                            | 898.88              | 120.49              |
| A_68_P27183507 | chr10:61441706-61441750                           | NM_007731:128     | Col13a1    | INSIDE                 | 0.253                                           | 0.649                            | 1229.23             | 797.35              | 0.164                            | 762.50              | 125.21              |
| A_68_P22893293 | chr4:47221194-47221238                            | NM_009928:333     | Col15a1    | INSIDE                 | 0.451                                           | 0.710                            | 7261.14             | 5151.80             | 0.320                            | 5222.86             | 1672.20             |
| A_68_P27266461 | chr10:76628282-76628326                           | NM_009929:971     | Col18a1    | INSIDE                 | 0.217                                           | 0.628                            | 2195.41             | 1377.63             | 0.136                            | 1733.46             | 235.82              |
| A_68_P27266466 | chr10:76628787-76628837                           | NM_009929:463     | Col18a1    | INSIDE                 | 0.069                                           | 2.104                            | 3474.49             | 7308.83             | 0.145                            | 2390.09             | 346.92              |
| A_68_P27793111 | chr11:51103960-51104004                           | NM_153393:561     | Col23a1    | INSIDE                 | 0.232                                           | 0.666                            | 2226.32             | 1483.60             | 0.154                            | 1682.83             | 259.68              |
| A_68_P22968878 | chr4:62875674-62875718                            | NM_025685:-749    | Col27a1    | PROMOTER               | 0.075                                           | 1.634                            | 2729.17             | 4459.20             | 0.122                            | 1704.67             | 207.86              |
| A_68_P22968884 | chr4:62876409-62876457                            | NM_025685:-13     | Col27a1    | PROMOTER               | 0.268                                           | 0.551                            | 1119.91             | 616.53              | 0.148                            | 808.31              | 119.35              |
| A_68_P30472461 | chr15:97832553-97832597                           | NM_001113515:2581 | Col2a1     | INSIDE                 | 0.127                                           | 0.664                            | 2322.67             | 1542.97             | 0.084                            | 1548.26             | 130.13              |
| A_68_P30472484 | chr15:97835084-97835128                           | NM_001113515:49   | Col2a1     | INSIDE                 | 0.489                                           | 0.643                            | 1403.13             | 901.75              | 0.315                            | 1122.06             | 352.90              |
| A_68_P29246781 | chr13:97313402-97313446                           | NM_001164222:735  | Col4a3bp   | INSIDE                 | 0.533                                           | 0.540                            | 2701.59             | 1460.20             | 0.288                            | 2053.29             | 591.26              |
| A_68_P21087493 | chr2:27741935-27741979                            | NM_015734:12      | Col5a1     | INSIDE                 | 0.639                                           | 0.633                            | 1692.94             | 1071.61             | 0.405                            | 1321.68             | 534.64              |
| A_68_P21087495 | chr2:27742216-27742260                            | NM_015734:294     | Col5a1     | INSIDE                 | 0.167                                           | 0.528                            | 2987.33             | 1576.89             | 0.088                            | 2176.71             | 191.99              |
| A_68_P27262972 | chr10:76059240-76059284                           | NM_146007:26887   | Col6a2     | INSIDE                 | 0.621                                           | 2.423                            | 1159.92             | 2810.02             | 1.504                            | 990.29              | 1489.82             |
| A_68_P23254629 | chr4:120712162-120712206                          | NM_007741:14      | Col9a2     | INSIDE                 | 0.348                                           | 0.656                            | 1641.29             | 1076.36             | 0.228                            | 1340.93             | 305.89              |
| A_68_P23254630 | chr4:120712227-120712271                          | NM_007741:78      | Col9a2     | INSIDE                 | 0.272                                           | 0.592                            | 1082.22             | 640.95              | 0.161                            | 890.79              | 143.52              |
| A_68_P21904962 | chr2:180333066-180333110                          | NM_009936:162     | Col9a3     | INSIDE                 | 0.448                                           | 0.686                            | 2689.73             | 1844.72             | 0.307                            | 2069.64             | 636.14              |
| A_68_P21904963 | chr2:180333140-180333184                          | NM_009936:236     | Col9a3     | INSIDE                 | 0.434                                           | 0.609                            | 2667.80             | 1625.38             | 0.264                            | 2106.33             | 556.86              |
| A_68_P31679713 | chr18:47118783-47118827                           | NM_178377:275     | Commd10    | INSIDE                 | 0.271                                           | 0.626                            | 1764.23             | 1104.33             | 0.170                            | 1414.72             | 240.03              |
| A_68_P29856056 | chr14:102039512-102039556                         | NM_001033132:154  | Commd6     | INSIDE                 | 0.444                                           | 0.524                            | 2094.58             | 1098.22             | 0.233                            | 1458.91             | 339.78              |
| A_68_P29856057 | chr14:102039624-102039668                         | NM_001033132:42   | Commd6     | INSIDE                 | 0.287                                           | 0.454                            | 4775.14             | 2167.54             | 0.130                            | 3500.99             | 456.54              |
| A_68_P25951436 | chr8:72898442-72898486                            | NM_016685:1018    | Comp       | INSIDE                 | 0.607                                           | 0.631                            | 1820.77             | 1149.15             | 0.383                            | 1374.59             | 526.43              |
| A_68_P25951442 | chr8:72899053-72899099                            | NM_016685:1630    | Comp       | INSIDE                 | 0.628                                           | 0.579                            | 2072.65             | 1200.28             | 0.364                            | 1575.08             | 572.82              |
| A_68_P25951443 | chr8:72899164-72899208                            | NM_016685:1740    | Comp       | INSIDE                 | 0.543                                           | 0.397                            | 1681.33             | 668.26              | 0.216                            | 1209.96             | 261.28              |
| A_68_P25951452 | chr8:72900302-72900346                            | NM_016685:2878    | Comp       | INSIDE                 | 0.464                                           | 0.556                            | 1257.80             | 699.23              | 0.258                            | 989.21              | 255.21              |
| A_68_P25951454 | chr8:72900470-72900514                            | NM_016685:3046    | Comp       | INSIDE                 | 0.238                                           | 0.641                            | 2556.74             | 1640.01             | 0.153                            | 1812.97             | 277.27              |
| A_68_P29455223 | chr14:22666866-22666910                           | NM_026965:1244    | Comtd1     | INSIDE                 | 0.257                                           | 0.664                            | 2081.90             | 1383.19             | 0.171                            | 1466.44             | 250.26              |
| A_68_P29455233 | chr14:22668221-22668265                           | NM_026965:-110    | Comtd1     | PROMOTER               | 0.580                                           | 0.619                            | 1182.20             | 732.35              | 0.359                            | 892.59              | 320.72              |



| ProbeName      | Target position of probe on CpG island microarray | TargetID          | GeneSymbol | CpG island Description | Ratio of relative methylation (TiO2-NP/Vehicle) | Sham group                       |                     |                     | TiO <sub>2</sub> -H group        |                     |                     |
|----------------|---------------------------------------------------|-------------------|------------|------------------------|-------------------------------------------------|----------------------------------|---------------------|---------------------|----------------------------------|---------------------|---------------------|
|                |                                                   |                   |            |                        |                                                 | Relative methylation (Cy-5/Cy-3) | Cy-3 signal (Input) | Cy-5 signal (MeDIP) | Relative methylation (Cy-5/Cy-3) | Cy-3 signal (Input) | Cy-5 signal (MeDIP) |
| A_68_P25435064 | chr7:121397732-121397776                          | NM_033370:440     | Copb1      | INSIDE                 | 0.310                                           | 0.674                            | 942.61              | 635.01              | 0.209                            | 784.38              | 164.07              |
| A_68_P25435069 | chr7:121398243-121398287                          | NM_033370:-70     | Copb1      | PROMOTER               | 0.322                                           | 0.582                            | 1570.16             | 913.29              | 0.187                            | 1374.61             | 257.32              |
| A_68_P21605247 | chr2:125684679-125684728                          | NM_009939:51      | Cops2      | INSIDE                 | 0.087                                           | 1.832                            | 1477.37             | 2707.09             | 0.159                            | 959.46              | 152.71              |
| A_68_P23930021 | chr5:100947315-100947359                          | NM_012001:9       | Cops4      | INSIDE                 | 0.309                                           | 0.492                            | 1167.19             | 573.85              | 0.152                            | 881.98              | 133.94              |
| A_68_P20412923 | chr1:88483836-88483880                            | NM_172974:184     | Cops7b     | INSIDE                 | 0.240                                           | 0.534                            | 3097.12             | 1654.84             | 0.128                            | 2250.29             | 288.46              |
| A_68_P20437266 | chr1:92500005-92500049                            | NM_133805:27      | Cops8      | INSIDE                 | 0.648                                           | 0.582                            | 1136.15             | 661.69              | 0.378                            | 937.25              | 353.96              |
| A_68_P20437269 | chr1:92500284-92500337                            | NM_133805:311     | Cops8      | INSIDE                 | 0.198                                           | 0.693                            | 1048.40             | 726.11              | 0.137                            | 890.24              | 121.83              |
| A_68_P28047198 | chr11:96723388-96723432                           | NM_019877:12221   | Copz2      | DOWNSTREAM             | 0.378                                           | 0.520                            | 2137.91             | 1110.95             | 0.196                            | 1668.77             | 327.66              |
| A_68_P27540982 | chr10:127805462-127805508                         | NM_001081040:1609 | Coq10a     | INSIDE                 | 0.197                                           | 0.641                            | 1315.01             | 843.25              | 0.126                            | 963.91              | 121.86              |
| A_68_P27540983 | chr10:127805581-127805626                         | NM_001081040:1490 | Coq10a     | INSIDE                 | 0.206                                           | 0.541                            | 3351.38             | 1813.28             | 0.111                            | 2483.56             | 276.82              |
| A_68_P20240146 | chr1:55109304-55109348                            | NM_001039710:-287 | Coq10b     | PROMOTER               | 0.572                                           | 0.604                            | 1427.39             | 862.22              | 0.346                            | 1131.81             | 391.22              |
| A_68_P24008813 | chr5:115729847-115729891                          | NM_026504:158     | Coq5       | INSIDE                 | 0.306                                           | 0.650                            | 876.70              | 569.85              | 0.199                            | 685.97              | 136.62              |
| A_68_P24008814 | chr5:115729967-115730011                          | NM_026504:278     | Coq5       | INSIDE                 | 0.126                                           | 0.506                            | 2392.61             | 1209.75             | 0.064                            | 1832.64             | 116.88              |
| A_68_P25458764 | chr7:125676519-125676570                          | NM_009940:283     | Coq7       | INSIDE                 | 0.182                                           | 0.621                            | 1310.99             | 813.62              | 0.113                            | 1035.79             | 116.70              |
| A_68_P25458767 | chr7:125676796-125676840                          | NM_009940:9       | Coq7       | INSIDE                 | 0.495                                           | 0.687                            | 1716.01             | 1179.57             | 0.340                            | 1340.19             | 455.98              |
| A_68_P25458768 | chr7:125676881-125676932                          | NM_009940:-79     | Coq7       | PROMOTER               | 0.235                                           | 0.623                            | 973.65              | 606.34              | 0.147                            | 802.68              | 117.65              |
| A_68_P26079750 | chr8:97362477-97362521                            | NM_026452:182     | Coq9       | INSIDE                 | 0.543                                           | 0.377                            | 3531.86             | 1332.20             | 0.205                            | 2767.06             | 566.52              |
| A_68_P23792212 | chr5:72895290-72895334                            | NM_016869:135     | Corin      | INSIDE                 | 0.520                                           | 0.496                            | 1492.72             | 739.71              | 0.258                            | 1165.66             | 300.32              |
| A_68_P22889568 | chr4:46614078-46614122                            | NM_001164804:701  | Coro2a     | INSIDE                 | 0.088                                           | 0.724                            | 2470.65             | 1788.66             | 0.064                            | 1938.06             | 123.89              |
| A_68_P22889569 | chr4:46614182-46614226                            | NM_001164804:597  | Coro2a     | INSIDE                 | 0.241                                           | 0.676                            | 1630.99             | 1103.03             | 0.163                            | 1072.11             | 174.96              |
| A_68_P22889573 | chr4:46614584-46614628                            | NM_001164804:195  | Coro2a     | INSIDE                 | 0.525                                           | 0.541                            | 1659.55             | 897.98              | 0.284                            | 1346.16             | 382.59              |
| A_68_P26571035 | chr9:62384198-62384249                            | NM_175484:628     | Coro2b     | INSIDE                 | 0.176                                           | 0.647                            | 1360.55             | 880.36              | 0.114                            | 1039.51             | 118.12              |
| A_68_P27937691 | chr11:77275964-77276008                           | NM_139128:-1428   | Coro6      | PROMOTER               | 0.202                                           | 0.539                            | 4893.39             | 2636.77             | 0.109                            | 3266.74             | 356.09              |
| A_68_P30511519 | chr16:4679291-4679335                             | NM_030205:408     | Coro7      | INSIDE                 | 0.585                                           | 0.743                            | 2750.91             | 2044.13             | 0.435                            | 2371.87             | 1031.09             |
| A_68_P30511523 | chr16:4679735-4679779                             | NM_030205:-36     | Coro7      | DIVERGENT_PROMOTER     | 0.543                                           | 0.679                            | 1880.36             | 1276.46             | 0.369                            | 1458.73             | 537.79              |
| A_68_P30511525 | chr16:4679878-4679922                             | NM_030205:-180    | Coro7      | DIVERGENT_PROMOTER     | 0.356                                           | 0.547                            | 1226.56             | 670.80              | 0.194                            | 1036.47             | 201.52              |
| A_68_P28581229 | chr12:82585711-82585766                           | NM_025461:359     | Cox16      | INSIDE                 | 0.221                                           | 0.487                            | 1436.61             | 699.30              | 0.107                            | 1130.79             | 121.39              |
| A_68_P28581231 | chr12:82586058-82586102                           | NM_025461:17      | Cox16      | INSIDE                 | 0.206                                           | 0.430                            | 1631.91             | 701.37              | 0.088                            | 1341.97             | 118.54              |
| A_68_P24135004 | chr5:139821148-139821192                          | NM_197980:-50     | Cox19      | DIVERGENT_PROMOTER     | 0.088                                           | 0.636                            | 4720.53             | 3002.72             | 0.056                            | 3184.38             | 178.65              |
| A_68_P26221733 | chr8:123191825-123191869                          | NM_010926:166     | Cox4nb     | INSIDE                 | 0.657                                           | 0.444                            | 1290.41             | 573.13              | 0.292                            | 1065.41             | 310.74              |
| A_68_P26542211 | chr9:57368765-57368824                            | NM_007747:-244    | Cox5a      | PROMOTER               | 0.250                                           | 0.550                            | 940.51              | 517.00              | 0.137                            | 876.65              | 120.48              |
| A_68_P20149809 | chr1:36748265-36748309                            | NM_009942:-45     | Cox5b      | DIVERGENT_PROMOTER     | 0.187                                           | 0.599                            | 1609.22             | 963.51              | 0.112                            | 1236.80             | 138.80              |
| A_68_P20149810 | chr1:36748331-36748375                            | NM_009942:21      | Cox5b      | INSIDE                 | 0.356                                           | 0.628                            | 2340.02             | 1468.56             | 0.223                            | 1593.40             | 356.01              |
| A_68_P24009173 | chr5:115798570-115798614                          | NM_007748:372     | Cox6a1     | INSIDE                 | 0.371                                           | 0.616                            | 2290.27             | 1410.48             | 0.228                            | 1743.29             | 397.93              |
| A_68_P24009177 | chr5:115799028-115799072                          | NM_007748:-86     | Cox6a1     | PROMOTER               | 0.349                                           | 0.603                            | 1919.81             | 1157.42             | 0.210                            | 1453.08             | 305.38              |
| A_68_P24009178 | chr5:115799183-115799231                          | NM_007748:-242    | Cox6a1     | PROMOTER               | 0.223                                           | 0.642                            | 1190.71             | 764.41              | 0.143                            | 831.42              | 118.85              |
| A_68_P30135998 | chr15:35867761-35867805                           | NM_053071:219     | Cox6c      | INSIDE                 | 0.529                                           | 0.432                            | 1432.50             | 618.45              | 0.229                            | 1182.85             | 270.29              |
| A_68_P26665914 | chr9:79607348-79607392                            | NM_009945:290     | Cox7a2     | INSIDE                 | 0.306                                           | 0.600                            | 2208.00             | 1325.14             | 0.183                            | 1604.11             | 294.20              |
| A_68_P26665915 | chr9:79607435-79607480                            | NM_009945:203     | Cox7a2     | INSIDE                 | 0.202                                           | 0.652                            | 1853.07             | 1208.60             | 0.132                            | 1468.04             | 193.66              |
| A_68_P29196857 | chr13:86186094-86186138                           | NM_007749:284     | Cox7c      | INSIDE                 | 0.650                                           | 0.505                            | 1146.09             | 579.31              | 0.328                            | 1081.14             | 355.01              |
| A_68_P25272111 | chr7:88599609-88599653                            | NM_007755:-68     | Cpeb1      | PROMOTER               | 0.276                                           | 0.444                            | 2878.93             | 1277.00             | 0.123                            | 2154.34             | 264.05              |
| A_68_P25272118 | chr7:88600431-88600478                            | NM_007755:-892    | Cpeb1      | PROMOTER               | 0.192                                           | 0.531                            | 2124.81             | 1128.16             | 0.102                            | 1537.68             | 156.71              |
| A_68_P32093242 | chr19:37093220-37093264                           | NM_198300:188541  | Cpeb3      | DOWNSTREAM             | 0.650                                           | 0.735                            | 2543.40             | 1870.48             | 0.478                            | 2135.53             | 1020.16             |
| A_68_P32094198 | chr19:37248988-37249032                           | NM_198300:32773   | Cpeb3      | INSIDE                 | 0.388                                           | 0.743                            | 3061.68             | 2274.48             | 0.288                            | 2444.14             | 704.83              |

| ProbeName      | Target position of probe on CpG island microarray | TargetID          | GeneSymbol | CpG island Description | Ratio of relative methylation (TiO2-NP/Vehicle) | Sham group                       |                     |                     | TiO <sub>2</sub> -H group        |                     |                     |
|----------------|---------------------------------------------------|-------------------|------------|------------------------|-------------------------------------------------|----------------------------------|---------------------|---------------------|----------------------------------|---------------------|---------------------|
|                |                                                   |                   |            |                        |                                                 | Relative methylation (Cy-5/Cy-3) | Cy-3 signal (Input) | Cy-5 signal (MeDIP) | Relative methylation (Cy-5/Cy-3) | Cy-3 signal (Input) | Cy-5 signal (MeDIP) |
| A_68_P32094200 | chr19:37249204-37249248                           | NM_198300:32557   | Cpeb3      | INSIDE                 | 0.651                                           | 0.667                            | 3503.09             | 2337.36             | 0.434                            | 2782.03             | 1207.72             |
| A_68_P32094201 | chr19:37249291-37249335                           | NM_198300:32471   | Cpeb3      | INSIDE                 | 0.146                                           | 0.533                            | 4915.16             | 2618.02             | 0.078                            | 4221.46             | 328.25              |
| A_68_P27685427 | chr11:31771207-31771257                           | NM_026252:-978    | Cpeb4      | PROMOTER               | 0.095                                           | 1.649                            | 1143.34             | 1885.26             | 0.157                            | 760.29              | 119.28              |
| A_68_P21769581 | chr2:155937720-155937764                          | NM_170588:-41     | Cpne1      | PROMOTER               | 0.375                                           | 0.652                            | 1093.47             | 713.36              | 0.245                            | 871.72              | 213.46              |
| A_68_P22765602 | chr4:19496630-19496674                            | NM_027769:599     | Cpne3      | INSIDE                 | 0.293                                           | 0.649                            | 793.67              | 514.74              | 0.190                            | 700.35              | 132.94              |
| A_68_P22765609 | chr4:19497322-19497369                            | NM_027769:-94     | Cpne3      | DIVERGENT_PROMOTER     | 0.337                                           | 0.512                            | 3128.24             | 1601.48             | 0.173                            | 2299.02             | 396.63              |
| A_68_P31126792 | chr17:29375212-29375256                           | NM_153166:-499    | Cpne5      | PROMOTER               | 0.282                                           | 0.570                            | 3122.91             | 1781.38             | 0.161                            | 2326.13             | 373.64              |
| A_68_P31126793 | chr17:29375333-29375377                           | NM_153166:-619    | Cpne5      | PROMOTER               | 0.213                                           | 0.657                            | 4373.03             | 2873.01             | 0.140                            | 3311.27             | 463.04              |
| A_68_P30431381 | chr15:90509463-90509507                           | NM_025815:335     | Cpne8      | INSIDE                 | 0.247                                           | 0.574                            | 2229.14             | 1279.68             | 0.142                            | 1778.65             | 251.86              |
| A_68_P30431388 | chr15:90510200-90510246                           | NM_025815:-403    | Cpne8      | PROMOTER               | 0.281                                           | 0.443                            | 1325.88             | 587.98              | 0.124                            | 1014.18             | 126.26              |
| A_68_P30431389 | chr15:90510273-90510317                           | NM_025815:-475    | Cpne8      | PROMOTER               | 0.297                                           | 0.635                            | 897.45              | 569.88              | 0.189                            | 639.64              | 120.75              |
| A_68_P30792739 | chr16:58670948-58670993                           | NM_007757:650     | Cpox       | INSIDE                 | 0.189                                           | 0.680                            | 1324.47             | 900.03              | 0.128                            | 1009.72             | 129.66              |
| A_68_P28688780 | chr12:103213637-103213681                         | NM_016856:-525    | Cpsf2      | PROMOTER               | 0.226                                           | 0.477                            | 1300.12             | 619.67              | 0.108                            | 1093.07             | 117.81              |
| A_68_P28688781 | chr12:103213776-103213820                         | NM_016856:-385    | Cpsf2      | PROMOTER               | 0.352                                           | 0.697                            | 2411.15             | 1679.69             | 0.245                            | 1947.31             | 477.31              |
| A_68_P28688787 | chr12:103214342-103214386                         | NM_016856:181     | Cpsf2      | INSIDE                 | 0.666                                           | 0.622                            | 2682.38             | 1667.29             | 0.414                            | 2038.61             | 843.77              |
| A_68_P28279804 | chr12:21292173-21292217                           | NM_018813:37      | Cpsf3      | INSIDE                 | 0.511                                           | 0.635                            | 852.53              | 541.29              | 0.325                            | 694.88              | 225.55              |
| A_68_P24164623 | chr5:145928226-145928276                          | NM_178576:158     | Cpsf4      | INSIDE                 | 0.210                                           | 0.495                            | 1597.11             | 791.11              | 0.104                            | 1135.02             | 118.17              |
| A_68_P31951138 | chr19:10599754-10599798                           | NM_001164272:43   | Cpsf7      | INSIDE                 | 0.472                                           | 0.479                            | 1594.89             | 764.44              | 0.226                            | 1409.44             | 319.07              |
| A_68_P23193625 | chr4:107595986-107596030                          | NM_009949:186     | Cpt2       | INSIDE                 | 0.541                                           | 0.570                            | 1575.74             | 897.86              | 0.308                            | 1261.84             | 388.93              |
| A_68_P23601183 | chr5:35868307-35868351                            | NM_153107:-53     | Cpz        | PROMOTER               | 0.267                                           | 0.577                            | 2645.43             | 1527.42             | 0.154                            | 1994.43             | 307.66              |
| A_68_P26527663 | chr9:54613548-54613592                            | NM_013496:956     | Crabp1     | INSIDE                 | 0.393                                           | 0.518                            | 1434.66             | 742.44              | 0.203                            | 1097.56             | 223.21              |
| A_68_P27364532 | chr10:94786282-94786326                           | NM_009950:427     | Cradd      | INSIDE                 | 0.435                                           | 0.404                            | 1815.26             | 733.87              | 0.176                            | 1427.80             | 251.19              |
| A_68_P31100996 | chr17:25150700-25150744                           | NM_020608:1453    | Cramp11    | INSIDE                 | 0.264                                           | 0.505                            | 1505.33             | 760.87              | 0.133                            | 1172.77             | 156.40              |
| A_68_P31100997 | chr17:25150808-25150852                           | NM_020608:1345    | Cramp11    | INSIDE                 | 0.422                                           | 0.664                            | 3615.04             | 2399.44             | 0.280                            | 2718.26             | 761.40              |
| A_68_P31101000 | chr17:25151186-25151230                           | NM_020608:967     | Cramp11    | INSIDE                 | 0.217                                           | 0.571                            | 8431.38             | 4816.82             | 0.124                            | 5935.64             | 736.09              |
| A_68_P21103093 | chr2:30270839-30270883                            | NM_007760:408     | Crat       | INSIDE                 | 0.241                                           | 0.471                            | 1612.70             | 759.28              | 0.114                            | 1062.47             | 120.66              |
| A_68_P31259843 | chr17:57201503-57201547                           | NM_177638:-175    | Crb3       | DIVERGENT_PROMOTER     | 0.607                                           | 0.687                            | 2382.63             | 1636.66             | 0.417                            | 1768.01             | 737.28              |
| A_68_P31259844 | chr17:57201624-57201668                           | NM_177638:-53     | Crb3       | DIVERGENT_PROMOTER     | 0.401                                           | 0.600                            | 1139.58             | 684.20              | 0.241                            | 965.34              | 232.70              |
| A_68_P31259845 | chr17:57201740-57201784                           | NM_177638:63      | Crb3       | INSIDE                 | 0.233                                           | 0.557                            | 1288.48             | 718.25              | 0.130                            | 950.80              | 123.39              |
| A_68_P20293011 | chr1:64579120-64579164                            | NM_001037726:-235 | Creb1      | PROMOTER               | 0.517                                           | 0.564                            | 3850.61             | 2170.53             | 0.291                            | 2688.19             | 783.60              |
| A_68_P20293015 | chr1:64579497-64579541                            | NM_001037726:141  | Creb1      | INSIDE                 | 0.395                                           | 1.637                            | 1498.43             | 2452.72             | 0.646                            | 1044.74             | 674.70              |
| A_68_P21425776 | chr2:91815643-91815687                            | NM_011957:48663   | Creb3l1    | DOWNSTREAM             | 0.323                                           | 0.554                            | 1548.19             | 858.35              | 0.179                            | 1192.03             | 213.29              |
| A_68_P21425958 | chr2:91848432-91848476                            | NM_011957:15873   | Creb3l1    | INSIDE                 | 0.544                                           | 0.461                            | 1531.75             | 705.60              | 0.251                            | 1151.80             | 288.78              |
| A_68_P24372701 | chr6:37391699-37391743                            | NM_178661:428     | Creb3l2    | INSIDE                 | 0.504                                           | 0.562                            | 1416.80             | 796.68              | 0.283                            | 1123.79             | 318.38              |
| A_68_P30508954 | chr16:4213021-4213065                             | NM_001025432:362  | Crebbp     | INSIDE                 | 0.526                                           | 0.674                            | 2557.64             | 1725.06             | 0.355                            | 2017.28             | 715.64              |
| A_68_P25313622 | chr7:97591232-97591276                            | NM_145151:-36     | Crebzf     | PROMOTER               | 0.214                                           | 0.476                            | 1463.37             | 697.12              | 0.102                            | 1187.97             | 121.08              |
| A_68_P25313629 | chr7:97592324-97592368                            | NM_145151:1056    | Crebzf     | INSIDE                 | 0.335                                           | 0.576                            | 3401.89             | 1959.86             | 0.193                            | 2509.54             | 484.51              |
| A_68_P25313631 | chr7:97592513-97592557                            | NM_145151:1244    | Crebzf     | INSIDE                 | 0.190                                           | 0.590                            | 1691.83             | 998.28              | 0.112                            | 1274.77             | 143.18              |
| A_68_P30421424 | chr15:88650529-88650573                           | NM_029720:475     | Credl2     | INSIDE                 | 0.303                                           | 0.531                            | 1051.01             | 558.34              | 0.161                            | 858.22              | 138.19              |
| A_68_P21976418 | chr3:19594468-19594512                            | NM_205769:906     | Crh        | INSIDE                 | 0.370                                           | 0.350                            | 1613.65             | 564.62              | 0.130                            | 1344.50             | 174.16              |
| A_68_P28089251 | chr11:103994664-103994708                         | NM_007762:491     | Crhr1      | INSIDE                 | 0.257                                           | 0.456                            | 2043.80             | 932.74              | 0.118                            | 1551.33             | 182.30              |
| A_68_P24467398 | chr6:55067497-55067541                            | NM_009953:15448   | Crhr2      | INSIDE                 | 0.290                                           | 0.491                            | 1247.82             | 612.33              | 0.142                            | 865.93              | 123.04              |
| A_68_P24467402 | chr6:55067829-55067873                            | NM_009953:15116   | Crhr2      | INSIDE                 | 0.422                                           | 0.608                            | 2457.72             | 1493.45             | 0.257                            | 2070.59             | 531.50              |
| A_68_P24467403 | chr6:55067907-55067951                            | NM_009953:15038   | Crhr2      | INSIDE                 | 0.259                                           | 0.413                            | 1531.70             | 633.35              | 0.107                            | 1247.41             | 133.69              |

| ProbeName      | Target position of probe on CpG island microarray | TargetID           | GeneSymbol | CpG island Description | Ratio of relative methylation (TiO2-NP/Vehicle) | Sham group                       |                     |                     | TiO <sub>2</sub> -H group        |                     |                     |
|----------------|---------------------------------------------------|--------------------|------------|------------------------|-------------------------------------------------|----------------------------------|---------------------|---------------------|----------------------------------|---------------------|---------------------|
|                |                                                   |                    |            |                        |                                                 | Relative methylation (Cy-5/Cy-3) | Cy-3 signal (Input) | Cy-5 signal (MeDIP) | Relative methylation (Cy-5/Cy-3) | Cy-3 signal (Input) | Cy-5 signal (MeDIP) |
| A_68_P31369877 | chr17:78600790-78600834                           | NM_015800:1225     | Crim1      | INSIDE                 | 0.468                                           | 0.707                            | 1646.14             | 1163.88             | 0.331                            | 1227.24             | 406.36              |
| A_68_P28754915 | chr12:114378792-114378837                         | NM_024223:368      | Crip2      | INSIDE                 | 0.242                                           | 0.632                            | 945.68              | 598.03              | 0.153                            | 758.98              | 116.00              |
| A_68_P31420723 | chr17:87424816-87424860                           | NM_019936:-62      | Cript      | DIVERGENT_PROMOTER     | 0.225                                           | 0.716                            | 1836.76             | 1314.24             | 0.161                            | 1325.06             | 213.69              |
| A_68_P31420724 | chr17:87424991-87425037                           | NM_019936:114      | Cript      | INSIDE                 | 0.094                                           | 1.411                            | 2658.36             | 3751.73             | 0.133                            | 1895.95             | 251.82              |
| A_68_P27927584 | chr11:75493253-75493297                           | NM_133656:463      | Crk        | INSIDE                 | 0.231                                           | 0.688                            | 2841.10             | 1953.86             | 0.159                            | 2229.42             | 354.73              |
| A_68_P30573854 | chr16:17452586-17452630                           | NM_007764:529      | Crkl       | INSIDE                 | 0.542                                           | 0.685                            | 1684.53             | 1154.00             | 0.372                            | 1284.92             | 477.48              |
| A_68_P30573855 | chr16:17452673-17452717                           | NM_007764:615      | Crkl       | INSIDE                 | 0.176                                           | 0.673                            | 1312.79             | 882.97              | 0.118                            | 978.99              | 115.74              |
| A_68_P25952213 | chr8:73017547-73017591                            | NM_018827:514      | Crlfl      | INSIDE                 | 0.414                                           | 0.663                            | 1178.42             | 780.87              | 0.274                            | 916.86              | 251.36              |
| A_68_P25952216 | chr8:73018033-73018077                            | NM_018827:1000     | Crlfl      | INSIDE                 | 0.122                                           | 0.669                            | 1916.75             | 1282.14             | 0.081                            | 1472.21             | 119.92              |
| A_68_P21715592 | chr2:145760196-145760240                          | NM_025820:218      | Crnk1l     | INSIDE                 | 0.327                                           | 0.435                            | 1660.27             | 722.48              | 0.142                            | 1238.30             | 176.21              |
| A_68_P23361908 | chr4:140616772-140616816                          | NM_001145958:-334  | Crocc      | PROMOTER               | 0.289                                           | 0.442                            | 4975.18             | 2200.64             | 0.128                            | 3735.03             | 476.92              |
| A_68_P23470689 | chr5:8997395-8997439                              | NM_023733:-270     | Crot       | PROMOTER               | 0.521                                           | 0.541                            | 1008.41             | 545.45              | 0.282                            | 794.17              | 223.71              |
| A_68_P32121139 | chr19:42505784-42505828                           | NM_145123:467      | Crtac1     | INSIDE                 | 0.141                                           | 1.354                            | 4979.47             | 6743.92             | 0.191                            | 3461.59             | 662.13              |
| A_68_P32121140 | chr19:42505908-42505952                           | NM_145123:343      | Crtac1     | INSIDE                 | 0.215                                           | 0.612                            | 2052.70             | 1256.73             | 0.131                            | 1546.30             | 203.26              |
| A_68_P32121150 | chr19:42506930-42506974                           | NM_145123:-679     | Crtac1     | PROMOTER               | 0.494                                           | 0.601                            | 1071.34             | 643.49              | 0.297                            | 792.14              | 235.11              |
| A_68_P26844288 | chr9:114277438-114277482                          | NM_019922:22370    | Crtap      | DOWNSTREAM             | 0.532                                           | 0.503                            | 1497.39             | 753.86              | 0.268                            | 1268.14             | 339.71              |
| A_68_P21428538 | chr2:92274073-92274117                            | NM_009963:132      | Cry2       | INSIDE                 | 0.277                                           | 0.458                            | 1293.82             | 591.94              | 0.127                            | 926.38              | 117.21              |
| A_68_P21428540 | chr2:92274280-92274324                            | NM_009963:-76      | Cry2       | PROMOTER               | 0.447                                           | 0.485                            | 2280.66             | 1106.33             | 0.217                            | 1641.36             | 355.74              |
| A_68_P20351100 | chr1:74939365-74939409                            | NM_021541:323      | Cryba2     | INSIDE                 | 0.505                                           | 0.611                            | 960.87              | 587.30              | 0.309                            | 797.41              | 246.27              |
| A_68_P23543724 | chr5:24256980-24257024                            | NM_153076:6659     | Crygn      | INSIDE                 | 0.260                                           | 0.620                            | 921.89              | 571.35              | 0.161                            | 754.76              | 121.85              |
| A_68_P29627745 | chr14:58017455-58017499                           | NM_030004:-156     | Cryll      | PROMOTER               | 0.467                                           | 0.497                            | 1504.53             | 747.01              | 0.232                            | 1267.21             | 293.90              |
| A_68_P22663511 | chr3:154259686-154259731                          | NM_009968:-267     | Cryz       | PROMOTER               | 0.155                                           | 0.472                            | 2252.36             | 1062.45             | 0.073                            | 1605.74             | 117.14              |
| A_68_P30964660 | chr16:91728640-91728684                           | NM_026994:385      | Cryz1l     | INSIDE                 | 0.270                                           | 0.726                            | 2596.26             | 1885.32             | 0.196                            | 1729.11             | 338.75              |
| A_68_P30964663 | chr16:91729071-91729122                           | NM_026994:-49      | Cryz1l     | DIVERGENT_PROMOTER     | 0.604                                           | 0.597                            | 1606.66             | 959.02              | 0.361                            | 1232.55             | 444.72              |
| A_68_P24850800 | chr6:131338648-131338692                          | NM_011733:-202     | Csda       | PROMOTER               | 0.608                                           | 0.474                            | 1407.49             | 667.06              | 0.288                            | 1216.73             | 350.56              |
| A_68_P22383903 | chr3:102824344-102824388                          | NM_001161854:-102  | Csde1      | PROMOTER               | 0.376                                           | 0.647                            | 808.74              | 523.50              | 0.243                            | 705.15              | 171.62              |
| A_68_P22383904 | chr3:102824419-102824463                          | NM_001161854:-28   | Csde1      | PROMOTER               | 0.582                                           | 0.712                            | 1739.02             | 1238.71             | 0.414                            | 1408.55             | 583.84              |
| A_68_P25944440 | chr8:71258901-71258945                            | NM_172753:119      | Csgalnaet1 | INSIDE                 | 0.295                                           | 0.632                            | 2416.83             | 1526.41             | 0.186                            | 1907.58             | 355.01              |
| A_68_P25693339 | chr8:17534712-17534756                            | NM_053171:651      | Csmd1      | INSIDE                 | 0.102                                           | 0.565                            | 4990.32             | 2818.22             | 0.057                            | 3377.19             | 194.11              |
| A_68_P25693340 | chr8:17534794-17534838                            | NM_053171:569      | Csmd1      | INSIDE                 | 0.227                                           | 0.643                            | 1476.56             | 950.06              | 0.146                            | 1076.95             | 157.17              |
| A_68_P25693341 | chr8:17534942-17534988                            | NM_053171:421      | Csmd1      | INSIDE                 | 0.109                                           | 0.534                            | 3144.37             | 1680.06             | 0.058                            | 2141.23             | 124.73              |
| A_68_P31758331 | chr18:61715432-61715480                           | NM_146087:221      | Csnk1a1    | INSIDE                 | 0.267                                           | 0.536                            | 1117.18             | 599.06              | 0.143                            | 843.72              | 120.88              |
| A_68_P30366491 | chr15:79271911-79271956                           | NM_013767:554      | Csnk1e     | INSIDE                 | 0.489                                           | 0.636                            | 1677.27             | 1067.49             | 0.311                            | 1333.40             | 414.71              |
| A_68_P26590186 | chr9:65757328-65757375                            | NM_173185:535      | Csnk1g1    | INSIDE                 | 0.201                                           | 0.555                            | 1332.98             | 739.79              | 0.112                            | 1041.20             | 116.32              |
| A_68_P27284377 | chr10:80085062-80085106                           | NM_134002:-440     | Csnk1g2    | PROMOTER               | 0.404                                           | 0.629                            | 1419.87             | 892.51              | 0.254                            | 1060.64             | 269.20              |
| A_68_P27284381 | chr10:80085791-80085835                           | NM_001159591:-6588 | Csnk1g2    | PROMOTER               | 0.407                                           | 0.460                            | 2111.74             | 970.58              | 0.187                            | 1557.44             | 291.41              |
| A_68_P27284382 | chr10:80085896-80085940                           | NM_001159591:-6482 | Csnk1g2    | PROMOTER               | 0.240                                           | 0.400                            | 2767.12             | 1106.66             | 0.096                            | 1963.51             | 188.81              |
| A_68_P27284472 | chr10:80097247-80097291                           | NM_001159591:4868  | Csnk1g2    | INSIDE                 | 0.625                                           | 2.677                            | 2810.08             | 7522.39             | 1.673                            | 1993.33             | 3334.83             |
| A_68_P27284501 | chr10:80101148-80101192                           | NM_001159591:8770  | Csnk1g2    | INSIDE                 | 0.652                                           | 2.188                            | 1736.53             | 3798.94             | 1.427                            | 1321.42             | 1885.63             |
| A_68_P31715729 | chr18:54021378-54021423                           | NM_152809:-366     | Csnk1g3    | PROMOTER               | 0.133                                           | 0.698                            | 1796.19             | 1253.59             | 0.093                            | 1298.58             | 120.61              |
| A_68_P31715738 | chr18:54022583-54022627                           | NM_152809:838      | Csnk1g3    | INSIDE                 | 0.081                                           | 1.393                            | 8923.58             | 12431.41            | 0.113                            | 5833.60             | 656.68              |
| A_68_P31157712 | chr17:35257797-35257841                           | NM_009975:574      | Csnk2b     | INSIDE                 | 0.253                                           | 0.606                            | 1049.24             | 635.32              | 0.153                            | 839.51              | 128.42              |
| A_68_P31157713 | chr17:35257880-35257924                           | NM_009975:490      | Csnk2b     | INSIDE                 | 0.150                                           | 0.559                            | 2161.91             | 1208.66             | 0.084                            | 1703.06             | 142.82              |
| A_68_P31157714 | chr17:35257967-35258011                           | NM_009975:404      | Csnk2b     | INSIDE                 | 0.472                                           | 0.713                            | 1646.62             | 1174.39             | 0.336                            | 1354.79             | 455.74              |

| ProbeName      | Target position of probe on CpG island microarray | TargetID            | GeneSymbol | CpG island Description | Ratio of relative methylation (TiO2-NP/Vehicle) | Sham group                       |                     |                     | TiO <sub>2</sub> -H group        |                     |                     |
|----------------|---------------------------------------------------|---------------------|------------|------------------------|-------------------------------------------------|----------------------------------|---------------------|---------------------|----------------------------------|---------------------|---------------------|
|                |                                                   |                     |            |                        |                                                 | Relative methylation (Cy-5/Cy-3) | Cy-3 signal (Input) | Cy-5 signal (MeDIP) | Relative methylation (Cy-5/Cy-3) | Cy-3 signal (Input) | Cy-5 signal (MeDIP) |
| A_68_P31157715 | chr17:35258104-35258148                           | NM_009975:266       | Csnk2b     | INSIDE                 | 0.525                                           | 0.671                            | 2018.35             | 1355.21             | 0.353                            | 1461.97             | 515.49              |
| A_68_P31157716 | chr17:35258201-35258245                           | NM_009975:170       | Csnk2b     | INSIDE                 | 0.248                                           | 0.679                            | 3573.03             | 2425.02             | 0.168                            | 2515.84             | 423.30              |
| A_68_P26822740 | chr9:110148381-110148425                          | NM_001166273:2116   | Cspg5      | INSIDE                 | 0.243                                           | 0.733                            | 5820.68             | 4268.36             | 0.178                            | 4139.87             | 736.45              |
| A_68_P26875482 | chr9:119892235-119892279                          | NM_153287:1520      | Csrnp1     | INSIDE                 | 0.288                                           | 0.343                            | 3301.34             | 1132.11             | 0.099                            | 2401.95             | 236.83              |
| A_68_P30486141 | chr15:100325298-100325342                         | NM_153407:350       | Csrnp2     | INSIDE                 | 0.246                                           | 0.656                            | 3590.26             | 2354.78             | 0.161                            | 2892.42             | 466.83              |
| A_68_P30486145 | chr15:100325764-100325808                         | NM_153407:-116      | Csrnp2     | PROMOTER               | 0.623                                           | 0.631                            | 1488.54             | 939.42              | 0.393                            | 1158.38             | 455.09              |
| A_68_P21706947 | chr2:144219117-144219161                          | NM_181417:24368     | Csrp2bp    | INSIDE                 | 0.536                                           | 2.854                            | 879.23              | 2509.04             | 1.530                            | 714.56              | 1093.14             |
| A_68_P21732682 | chr2:148700871-148700915                          | NM_009976:312       | Cst1       | INSIDE                 | 0.450                                           | 0.434                            | 1634.82             | 709.94              | 0.196                            | 1360.69             | 266.14              |
| A_68_P21732684 | chr2:148701174-148701218                          | NM_009976:8         | Cst3       | INSIDE                 | 0.102                                           | 0.467                            | 3411.58             | 1592.02             | 0.047                            | 2577.17             | 122.17              |
| A_68_P31928179 | chr19:5349318-5349363                             | NM_028623:234       | Cst6       | INSIDE                 | 0.275                                           | 0.450                            | 2286.28             | 1028.02             | 0.124                            | 1811.51             | 223.91              |
| A_68_P21863931 | chr2:172196546-172196590                          | NM_024199:66        | Cstf1      | INSIDE                 | 0.235                                           | 0.721                            | 2329.05             | 1678.69             | 0.169                            | 1783.98             | 302.07              |
| A_68_P21489860 | chr2:104430467-104430511                          | NM_001037326:-152   | Cstf3      | PROMOTER               | 0.146                                           | 0.705                            | 2994.71             | 2109.85             | 0.103                            | 2084.39             | 214.56              |
| A_68_P25539028 | chr7:140316412-140316456                          | NM_009980:-1268     | Ctbp2      | PROMOTER               | 0.474                                           | 0.420                            | 1352.64             | 568.73              | 0.199                            | 1173.11             | 233.91              |
| A_68_P22614659 | chr3:146113265-146113309                          | NM_028836:-170      | Ctbs       | PROMOTER               | 0.454                                           | 0.492                            | 1523.72             | 748.91              | 0.223                            | 1212.16             | 270.64              |
| A_68_P26135025 | chr8:108159869-108159913                          | NM_181322:-547      | Ctcf       | PROMOTER               | 0.275                                           | 0.481                            | 1876.65             | 902.22              | 0.132                            | 1343.38             | 177.67              |
| A_68_P26135030 | chr8:108160451-108160495                          | NM_181322:35        | Ctcf       | INSIDE                 | 0.442                                           | 0.615                            | 1113.39             | 684.51              | 0.271                            | 911.29              | 247.39              |
| A_68_P31864632 | chr18:80665927-80665971                           | NM_026295:458       | Ctdp1      | INSIDE                 | 0.457                                           | 0.543                            | 2390.19             | 1297.01             | 0.248                            | 1893.54             | 469.66              |
| A_68_P31838819 | chr18:75856123-75856171                           | NM_201354:1204      | Ctif       | INSIDE                 | 0.187                                           | 0.587                            | 1597.47             | 937.31              | 0.110                            | 1322.73             | 145.18              |
| A_68_P31838825 | chr18:75856820-75856864                           | NM_201354:508       | Ctif       | INSIDE                 | 0.351                                           | 0.478                            | 1876.78             | 897.37              | 0.168                            | 1354.08             | 227.25              |
| A_68_P31616437 | chr18:35278200-35278244                           | NM_009818:-343      | Cttna1     | PROMOTER               | 0.425                                           | 0.613                            | 1314.59             | 806.16              | 0.261                            | 1136.59             | 296.11              |
| A_68_P31616442 | chr18:35278972-35279016                           | NM_009818:429       | Cttna1     | INSIDE                 | 0.211                                           | 0.530                            | 2167.37             | 1148.16             | 0.112                            | 1700.53             | 189.95              |
| A_68_P27191665 | chr10:63046368-63046418                           | NM_001164376:126134 | Cttna3     | INSIDE                 | 0.637                                           | 2.627                            | 760.18              | 1996.91             | 1.674                            | 593.57              | 993.89              |
| A_68_P22941963 | chr4:56877865-56877909                            | NM_018761:197       | Cttna11    | INSIDE                 | 0.267                                           | 0.673                            | 3539.80             | 2381.13             | 0.180                            | 2605.56             | 468.37              |
| A_68_P22941964 | chr4:56877971-56878015                            | NM_018761:91        | Cttna11    | INSIDE                 | 0.136                                           | 0.566                            | 4259.49             | 2410.06             | 0.077                            | 3282.49             | 251.89              |
| A_68_P22941966 | chr4:56878242-56878286                            | NM_018761:-181      | Cttna11    | PROMOTER               | 0.094                                           | 0.737                            | 3378.25             | 2490.28             | 0.069                            | 2376.21             | 164.66              |
| A_68_P26880506 | chr9:120843223-120843267                          | NM_001165902:549    | Cttnb1     | INSIDE                 | 0.422                                           | 0.512                            | 1548.12             | 792.34              | 0.216                            | 1269.45             | 274.37              |
| A_68_P23400905 | chr4:148892711-148892755                          | NM_023465:383       | Cttnb1p1   | INSIDE                 | 0.188                                           | 0.664                            | 2722.42             | 1808.01             | 0.125                            | 2067.79             | 257.58              |
| A_68_P21778673 | chr2:157563323-157563367                          | NM_025680:208       | Cttnb11    | INSIDE                 | 0.304                                           | 0.482                            | 1643.11             | 792.00              | 0.147                            | 1302.72             | 190.98              |
| A_68_P21778674 | chr2:157563392-157563436                          | NM_025680:278       | Cttnb11    | INSIDE                 | 0.241                                           | 0.409                            | 1607.35             | 657.19              | 0.098                            | 1161.13             | 114.34              |
| A_68_P30106579 | chr15:30102117-30102161                           | NM_008729:-209      | Cttnb2     | PROMOTER               | 0.282                                           | 0.616                            | 1878.08             | 1157.70             | 0.174                            | 1487.11             | 258.73              |
| A_68_P30109622 | chr15:30576916-30576960                           | NM_008729:474591    | Cttnb2     | INSIDE                 | 0.580                                           | 0.676                            | 6571.73             | 4443.22             | 0.392                            | 5192.23             | 2037.84             |
| A_68_P30109623 | chr15:30576998-30577042                           | NM_008729:474673    | Cttnb2     | INSIDE                 | 0.362                                           | 0.407                            | 1353.05             | 550.99              | 0.148                            | 980.81              | 144.78              |
| A_68_P23252015 | chr4:120242852-120242896                          | NM_016748:7         | Ctpts      | INSIDE                 | 0.606                                           | 0.510                            | 1269.60             | 647.95              | 0.309                            | 1139.09             | 352.38              |
| A_68_P23252016 | chr4:120243027-120243071                          | NM_016748:-167      | Ctpts      | PROMOTER               | 0.170                                           | 0.552                            | 2445.91             | 1351.29             | 0.094                            | 1616.25             | 151.68              |
| A_68_P25416680 | chr7:118172636-118172680                          | NM_009431:194       | Ctr9       | INSIDE                 | 0.460                                           | 0.650                            | 2433.92             | 1581.60             | 0.299                            | 1903.35             | 569.24              |
| A_68_P25416834 | chr7:118199064-118199108                          | NM_009431:26622     | Ctr9       | INSIDE                 | 0.629                                           | 2.955                            | 630.19              | 1862.12             | 1.860                            | 559.19              | 1040.14             |
| A_68_P21820017 | chr2:164658603-164658647                          | NM_001038492:252    | Ctsa       | INSIDE                 | 0.584                                           | 0.619                            | 1168.57             | 723.19              | 0.361                            | 836.37              | 302.12              |
| A_68_P29659269 | chr14:63741273-63741317                           | NM_007798:-7        | Ctsb       | PROMOTER               | 0.356                                           | 0.737                            | 4175.57             | 3077.50             | 0.262                            | 3408.61             | 893.77              |
| A_68_P29659270 | chr14:63741403-63741447                           | NM_007798:123       | Ctsb       | INSIDE                 | 0.270                                           | 0.620                            | 2316.59             | 1435.18             | 0.167                            | 1751.69             | 293.15              |
| A_68_P29659271 | chr14:63741571-63741615                           | NM_007798:291       | Ctsb       | INSIDE                 | 0.246                                           | 0.642                            | 871.04              | 559.29              | 0.158                            | 729.97              | 115.21              |
| A_68_P29659272 | chr14:63741639-63741683                           | NM_007798:359       | Ctsb       | INSIDE                 | 0.302                                           | 0.570                            | 985.32              | 561.73              | 0.172                            | 849.82              | 146.38              |
| A_68_P25301855 | chr7:95426643-95426687                            | NM_009982:62        | Ctsc       | INSIDE                 | 0.139                                           | 0.586                            | 2010.20             | 1178.91             | 0.081                            | 1438.24             | 117.22              |
| A_68_P25594358 | chr7:149573933-149573977                          | NM_009983:-179      | Ctsd       | PROMOTER               | 0.329                                           | 0.444                            | 1208.99             | 536.50              | 0.146                            | 972.25              | 141.86              |
| A_68_P29098530 | chr13:64471460-64471504                           | NM_009984:132       | Ctsl       | INSIDE                 | 0.300                                           | 0.650                            | 1179.67             | 766.37              | 0.195                            | 936.16              | 182.74              |

| ProbeName      | Target position of probe on CpG island microarray | TargetID           | GeneSymbol | CpG island Description | Ratio of relative methylation (TiO2-NP/Vehicle) | Sham group                       |                     |                     | TiO <sub>2</sub> -H group        |                     |                     |
|----------------|---------------------------------------------------|--------------------|------------|------------------------|-------------------------------------------------|----------------------------------|---------------------|---------------------|----------------------------------|---------------------|---------------------|
|                |                                                   |                    |            |                        |                                                 | Relative methylation (Cy-5/Cy-3) | Cy-3 signal (Input) | Cy-5 signal (MeDIP) | Relative methylation (Cy-5/Cy-3) | Cy-3 signal (Input) | Cy-5 signal (MeDIP) |
| A_68_P29098531 | chr13:64471536-64471580                           | NM_009984:56       | Ctsl       | INSIDE                 | 0.261                                           | 0.546                            | 1591.37             | 869.53              | 0.142                            | 1296.56             | 184.68              |
| A_68_P21875386 | chr2:174264415-174264459                          | NM_022325:57       | Ctsz       | INSIDE                 | 0.377                                           | 0.679                            | 6326.25             | 4298.29             | 0.256                            | 4237.74             | 1085.97             |
| A_68_P22394781 | chr3:104855923-104855967                          | NM_001163332:-73   | Cttnbp2nl  | PROMOTER               | 0.207                                           | 0.640                            | 1291.37             | 826.03              | 0.133                            | 925.04              | 122.58              |
| A_68_P25083581 | chr7:50931799-50931843                            | NM_145582:4420     | Ctu1       | INSIDE                 | 0.669                                           | 2.401                            | 2120.58             | 5091.69             | 1.606                            | 1452.51             | 2332.23             |
| A_68_P25616894 | chr8:4258857-4258901                              | NM_183315:396      | Ctxn1      | INSIDE                 | 0.666                                           | 0.634                            | 1584.26             | 1005.21             | 0.422                            | 1240.33             | 523.97              |
| A_68_P27997845 | chr11:87913051-87913095                           | NM_198013:425      | Cuedc1     | INSIDE                 | 0.604                                           | 0.638                            | 1295.02             | 826.82              | 0.386                            | 1219.44             | 470.60              |
| A_68_P27998412 | chr11:88007125-88007169                           | NM_001172099:24080 | Cuedc1     | INSIDE                 | 0.291                                           | 1.632                            | 1600.20             | 2611.79             | 0.474                            | 1254.77             | 595.27              |
| A_68_P32143334 | chr19:46413011-46413055                           | NM_001164290:118   | Cuedc2     | INSIDE                 | 0.512                                           | 0.469                            | 1230.91             | 577.32              | 0.240                            | 1008.01             | 241.88              |
| A_68_P31458279 | chr18:3383133-3383177                             | NM_029402:-68      | Cul2       | PROMOTER               | 0.309                                           | 0.489                            | 1043.64             | 510.51              | 0.151                            | 794.34              | 119.90              |
| A_68_P32328375 | chrX:35918239-35918283                            | NM_001110142:11113 | Cul4b      | INSIDE                 | 0.070                                           | 2.613                            | 4453.97             | 11636.75            | 0.184                            | 1912.55             | 351.27              |
| A_68_P32328376 | chrX:35918353-35918397                            | NM_001110142:10999 | Cul4b      | INSIDE                 | 0.362                                           | 4.458                            | 5368.72             | 23933.97            | 1.613                            | 2521.92             | 4067.59             |
| A_68_P32328377 | chrX:35918417-35918470                            | NM_001110142:10930 | Cul4b      | INSIDE                 | 0.052                                           | 3.025                            | 1745.89             | 5281.59             | 0.156                            | 739.79              | 115.73              |
| A_68_P31207500 | chr17:46683388-46683432                           | NM_001081335:-73   | Cul9       | PROMOTER               | 0.051                                           | 2.117                            | 3755.77             | 7950.94             | 0.108                            | 2256.59             | 243.96              |
| A_68_P31113295 | chr17:27076389-27076433                           | NM_026307:3        | Cuta       | INSIDE                 | 0.635                                           | 0.361                            | 1600.29             | 578.07              | 0.229                            | 1269.62             | 291.24              |
| A_68_P32128432 | chr19:43827652-43827696                           | NM_001113562:162   | Cutc       | INSIDE                 | 0.154                                           | 0.546                            | 5862.75             | 3201.70             | 0.084                            | 4363.22             | 367.43              |
| A_68_P32128433 | chr19:43827788-43827832                           | NM_001113562:298   | Cutc       | INSIDE                 | 0.343                                           | 0.633                            | 2293.03             | 1451.94             | 0.217                            | 1730.26             | 375.31              |
| A_68_P24122101 | chr5:137043954-137043998                          | NM_009986:-675     | Cux1       | PROMOTER               | 0.339                                           | 0.571                            | 1610.95             | 919.22              | 0.194                            | 1380.86             | 267.45              |
| A_68_P24047549 | chr5:122398855-122398899                          | NM_007804:98958    | Cux2       | INSIDE                 | 0.494                                           | 0.424                            | 1593.28             | 674.77              | 0.209                            | 1301.92             | 272.49              |
| A_68_P26317494 | chr9:14305171-14305215                            | NM_023153:130      | Cwe15      | INSIDE                 | 0.174                                           | 0.589                            | 2438.09             | 1436.86             | 0.102                            | 2042.22             | 208.86              |
| A_68_P21360374 | chr2:77783936-77783980                            | NM_030560:452      | Cwe22      | INSIDE                 | 0.267                                           | 0.466                            | 2112.35             | 983.94              | 0.125                            | 1760.28             | 219.18              |
| A_68_P29292644 | chr13:105607137-105607182                         | NM_026072:-126     | Cwe27      | DIVERGENT_PROMOTER     | 0.547                                           | 0.609                            | 1368.52             | 833.90              | 0.333                            | 1139.10             | 379.52              |
| A_68_P30895371 | chr16:78301854-78301898                           | NM_001025192:-59   | Cxadr      | PROMOTER               | 0.432                                           | 0.542                            | 1773.20             | 961.47              | 0.234                            | 1472.04             | 344.71              |
| A_68_P30895372 | chr16:78302001-78302045                           | NM_001025192:87    | Cxadr      | INSIDE                 | 0.485                                           | 0.644                            | 1640.50             | 1056.16             | 0.312                            | 1285.44             | 401.09              |
| A_68_P30895376 | chr16:78302422-78302466                           | NM_001025192:509   | Cxadr      | INSIDE                 | 0.559                                           | 0.599                            | 1035.41             | 619.77              | 0.334                            | 734.45              | 245.67              |
| A_68_P24780081 | chr6:117118598-117118642                          | NM_021704:68       | Cxc1l2     | INSIDE                 | 0.256                                           | 0.527                            | 3385.70             | 1785.81             | 0.135                            | 2469.10             | 333.23              |
| A_68_P20601161 | chr1:130487885-130487929                          | NM_009911:970      | Cxcr4      | INSIDE                 | 0.500                                           | 0.419                            | 2586.95             | 1084.96             | 0.210                            | 1983.28             | 415.54              |
| A_68_P22546441 | chr3:133899193-133899237                          | NM_001004367:-3897 | Cxxc4      | PROMOTER               | 0.078                                           | 0.749                            | 4240.34             | 3178.10             | 0.058                            | 2918.18             | 169.53              |
| A_68_P31620296 | chr18:35989257-35989301                           | NM_133687:-193     | Cxxc5      | PROMOTER               | 0.502                                           | 0.421                            | 1309.01             | 550.85              | 0.211                            | 1045.22             | 221.00              |
| A_68_P31620298 | chr18:35989480-35989524                           | NM_133687:31       | Cxxc5      | INSIDE                 | 0.058                                           | 0.711                            | 6141.97             | 4366.36             | 0.041                            | 4314.31             | 177.72              |
| A_68_P31620305 | chr18:35990289-35990333                           | NM_133687:839      | Cxxc5      | INSIDE                 | 0.173                                           | 0.572                            | 4581.05             | 2620.95             | 0.099                            | 3103.76             | 307.44              |
| A_68_P22411201 | chr3:108003559-108003603                          | NM_001081320:172   | Cyb561d1   | INSIDE                 | 0.147                                           | 0.723                            | 2406.39             | 1739.12             | 0.106                            | 1685.36             | 179.31              |
| A_68_P27913314 | chr11:72608834-72608878                           | NM_001024926:485   | Cyb5d2     | INSIDE                 | 0.269                                           | 0.530                            | 1076.15             | 570.73              | 0.142                            | 841.16              | 119.81              |
| A_68_P27913316 | chr11:72608989-72609033                           | NM_001024926:331   | Cyb5d2     | INSIDE                 | 0.553                                           | 0.692                            | 1555.18             | 1076.84             | 0.383                            | 1307.64             | 500.27              |
| A_68_P26233347 | chr8:124956923-124956967                          | NM_007806:-104     | Cyba       | PROMOTER               | 0.515                                           | 0.547                            | 1100.64             | 602.03              | 0.282                            | 904.73              | 255.00              |
| A_68_P21317590 | chr2:70956135-70956179                            | NM_028593:46       | Cybrd1     | INSIDE                 | 0.472                                           | 0.418                            | 3059.45             | 1277.99             | 0.197                            | 2248.01             | 443.31              |
| A_68_P21317591 | chr2:70956240-70956284                            | NM_028593:152      | Cybrd1     | INSIDE                 | 0.174                                           | 0.585                            | 1607.24             | 939.63              | 0.102                            | 1194.98             | 121.41              |
| A_68_P21317592 | chr2:70956339-70956383                            | NM_028593:250      | Cybrd1     | INSIDE                 | 0.406                                           | 0.558                            | 1737.90             | 970.02              | 0.226                            | 1323.53             | 299.72              |
| A_68_P24438772 | chr6:50516320-50516364                            | NM_007808:131      | Cyes       | INSIDE                 | 0.338                                           | 0.389                            | 1792.99             | 697.19              | 0.131                            | 1553.85             | 204.01              |
| A_68_P30349757 | chr15:76490222-76490266                           | NM_019396:247      | Cyhr1      | INSIDE                 | 0.163                                           | 0.651                            | 2882.75             | 1876.43             | 0.106                            | 1975.22             | 208.99              |
| A_68_P26042567 | chr8:91220855-91220899                            | NM_001128170:-50   | Cyld       | PROMOTER               | 0.137                                           | 0.680                            | 3877.03             | 2636.67             | 0.093                            | 2731.99             | 254.67              |
| A_68_P26042572 | chr8:91221405-91221449                            | NM_001128169:484   | Cyld       | INSIDE                 | 0.266                                           | 0.527                            | 1386.38             | 730.10              | 0.140                            | 990.49              | 138.50              |
| A_68_P32097099 | chr19:37772682-37772726                           | NM_007811:407      | Cyp26a1    | INSIDE                 | 0.636                                           | 0.685                            | 1552.26             | 1062.66             | 0.436                            | 1380.23             | 601.39              |
| A_68_P32097101 | chr19:37772874-37772918                           | NM_007811:599      | Cyp26a1    | INSIDE                 | 0.393                                           | 0.426                            | 1213.97             | 517.08              | 0.167                            | 1052.81             | 176.09              |
| A_68_P32097109 | chr19:37773781-37773827                           | NM_007811:1507     | Cyp26a1    | INSIDE                 | 0.203                                           | 0.472                            | 2573.06             | 1214.84             | 0.096                            | 2008.95             | 192.74              |

| ProbeName      | Target position of probe on CpG island microarray | TargetID           | GeneSymbol    | CpG island Description | Ratio of relative methylation (TiO2-NP/Vehicle) | Sham group                       |                     |                     | TiO <sub>2</sub> -H group        |                     |                     |
|----------------|---------------------------------------------------|--------------------|---------------|------------------------|-------------------------------------------------|----------------------------------|---------------------|---------------------|----------------------------------|---------------------|---------------------|
|                |                                                   |                    |               |                        |                                                 | Relative methylation (Cy-5/Cy-3) | Cy-3 signal (Input) | Cy-5 signal (MeDIP) | Relative methylation (Cy-5/Cy-3) | Cy-3 signal (Input) | Cy-5 signal (MeDIP) |
| A_68_P24600267 | chr6:84534196-84534247                            | NM_175475:9583     | Cyp26b1       | INSIDE                 | 0.206                                           | 0.512                            | 1498.50             | 766.72              | 0.105                            | 1165.31             | 122.64              |
| A_68_P24600268 | chr6:84534331-84534375                            | NM_175475:9452     | Cyp26b1       | INSIDE                 | 0.254                                           | 0.403                            | 1425.21             | 574.31              | 0.102                            | 1140.45             | 116.76              |
| A_68_P24600270 | chr6:84534486-84534530                            | NM_175475:9296     | Cyp26b1       | INSIDE                 | 0.171                                           | 0.698                            | 1418.90             | 989.91              | 0.119                            | 1227.07             | 146.30              |
| A_68_P24600279 | chr6:84535601-84535645                            | NM_175475:8182     | Cyp26b1       | INSIDE                 | 0.498                                           | 0.661                            | 845.60              | 559.03              | 0.329                            | 781.39              | 257.13              |
| A_68_P24600305 | chr6:84538923-84538970                            | NM_175475:4858     | Cyp26b1       | INSIDE                 | 0.205                                           | 0.731                            | 2470.27             | 1804.54             | 0.149                            | 1827.62             | 273.18              |
| A_68_P24600308 | chr6:84539342-84539397                            | NM_175475:4435     | Cyp26b1       | INSIDE                 | 0.182                                           | 0.694                            | 1167.85             | 811.02              | 0.126                            | 958.11              | 120.98              |
| A_68_P24600309 | chr6:84539419-84539463                            | NM_175475:4364     | Cyp26b1       | INSIDE                 | 0.240                                           | 0.514                            | 1259.93             | 647.70              | 0.124                            | 976.92              | 120.77              |
| A_68_P27533698 | chr10:126486217-126486263                         | NM_010009:939      | Cyp27b1       | INSIDE                 | 0.326                                           | 0.365                            | 1690.55             | 617.35              | 0.119                            | 1110.02             | 132.01              |
| A_68_P27533699 | chr10:126486293-126486337                         | NM_010009:1013     | Cyp27b1       | INSIDE                 | 0.318                                           | 0.531                            | 2346.75             | 1245.55             | 0.169                            | 1762.54             | 297.73              |
| A_68_P25436575 | chr7:121706623-121706670                          | NM_177382:-160     | Cyp2r1        | PROMOTER               | 0.390                                           | 0.629                            | 1074.68             | 675.45              | 0.245                            | 783.63              | 191.86              |
| A_68_P28727506 | chr12:109591095-109591139                         | NM_010010:18526    | Cyp46a1       | INSIDE                 | 0.357                                           | 0.489                            | 1756.76             | 859.13              | 0.175                            | 1359.43             | 237.62              |
| A_68_P31145617 | chr17:32589667-32589711                           | NM_177307:21       | Cyp4f39       | INSIDE                 | 0.369                                           | 1.547                            | 1792.63             | 2772.84             | 0.571                            | 1301.42             | 743.55              |
| A_68_P31145618 | chr17:32589827-32589872                           | NM_177307:182      | Cyp4f39       | INSIDE                 | 0.131                                           | 1.497                            | 3862.24             | 5780.25             | 0.197                            | 2548.25             | 501.03              |
| A_68_P23448645 | chr5:4104155-4104199                              | NM_020010:521      | Cyp5l1        | INSIDE                 | 0.479                                           | 0.667                            | 1310.96             | 874.53              | 0.319                            | 1029.64             | 328.77              |
| A_68_P23448648 | chr5:4104578-4104622                              | NM_020010:97       | Cyp5l1        | INSIDE                 | 0.233                                           | 0.382                            | 1575.88             | 602.63              | 0.089                            | 1302.24             | 115.83              |
| A_68_P22609954 | chr3:145312413-145312457                          | NM_010516:515      | Cyr6l1        | INSIDE                 | 0.106                                           | 0.509                            | 3045.06             | 1549.09             | 0.054                            | 2202.75             | 119.22              |
| A_68_P22609958 | chr3:145312902-145312946                          | NM_010516:25       | Cyr6l1        | INSIDE                 | 0.201                                           | 0.534                            | 1382.71             | 737.81              | 0.107                            | 1107.28             | 118.96              |
| A_68_P22609959 | chr3:145313007-145313055                          | NM_010516:-81      | Cyr6l1        | PROMOTER               | 0.444                                           | 0.515                            | 1021.54             | 525.69              | 0.229                            | 776.44              | 177.50              |
| A_68_P22609986 | chr3:145316237-145316281                          | NM_010516:-3309    | Cyr6l1        | PROMOTER               | 0.232                                           | 2.130                            | 5851.95             | 12467.31            | 0.494                            | 3845.62             | 1900.72             |
| A_68_P24157330 | chr5:144383580-144383624                          | NM_011182:287      | Cyth3         | INSIDE                 | 0.518                                           | 0.607                            | 2619.29             | 1588.92             | 0.314                            | 2100.62             | 659.94              |
| A_68_P27272488 | chr10:77632611-77632655                           | NM_138601:-119     | D10Jhu81e     | PROMOTER               | 0.476                                           | 0.523                            | 1479.67             | 774.53              | 0.249                            | 1114.96             | 277.98              |
| A_68_P27297057 | chr10:82823167-82823211                           | NM_026579:223      | D10Wsu102e    | INSIDE                 | 0.359                                           | 0.481                            | 2993.75             | 1439.96             | 0.172                            | 2206.63             | 380.57              |
| A_68_P28143433 | chr11:113546017-113546061                         | NM_177777:313      | D11Wsu47e     | INSIDE                 | 0.319                                           | 0.698                            | 1910.64             | 1333.85             | 0.222                            | 1321.37             | 294.00              |
| A_68_P28143423 | chr11:113544774-113544818                         | NM_138598:669      | D11Wsu99e     | INSIDE                 | 0.199                                           | 0.623                            | 1170.45             | 729.50              | 0.124                            | 947.60              | 117.73              |
| A_68_P28143424 | chr11:113544952-113544996                         | NM_138598:491      | D11Wsu99e     | INSIDE                 | 0.389                                           | 0.525                            | 2517.62             | 1321.72             | 0.204                            | 2111.80             | 431.46              |
| A_68_P29480508 | chr14:26746521-26746565                           | NM_025311:194      | D14Ert449e    | INSIDE                 | 0.150                                           | 0.537                            | 5034.47             | 2705.84             | 0.080                            | 4056.60             | 326.20              |
| A_68_P29480509 | chr14:26746634-26746678                           | NM_025311:80       | D14Ert449e    | INSIDE                 | 0.219                                           | 0.513                            | 3717.51             | 1907.51             | 0.112                            | 2996.38             | 336.38              |
| A_68_P29480513 | chr14:26747056-26747103                           | NM_025311:-343     | D14Ert449e    | PROMOTER               | 0.398                                           | 0.358                            | 1735.25             | 621.67              | 0.143                            | 1456.35             | 207.60              |
| A_68_P30247880 | chr15:58247520-58247564                           | NM_145959:520      | D15Ert621e    | INSIDE                 | 0.212                                           | 0.584                            | 1212.14             | 707.47              | 0.124                            | 937.07              | 116.08              |
| A_68_P30896823 | chr16:78577179-78577223                           | NM_025967:-287     | D16Ert472e    | PROMOTER               | 0.645                                           | 0.681                            | 1168.17             | 795.47              | 0.439                            | 1059.91             | 465.78              |
| A_68_P31254442 | chr17:56323432-56323476                           | NM_080837:-111     | D17Wsu104e    | PROMOTER               | 0.344                                           | 0.454                            | 2548.60             | 1158.08             | 0.156                            | 2023.79             | 315.92              |
| A_68_P31118681 | chr17:27956946-27956990                           | NM_001033279:519   | D17Wsu92e     | INSIDE                 | 0.551                                           | 0.485                            | 2873.68             | 1393.55             | 0.267                            | 2432.03             | 649.68              |
| A_68_P32040826 | chr19:27504142-27504186                           | NM_177474:146      | D19Bwg1357e   | INSIDE                 | 0.288                                           | 0.614                            | 4153.16             | 2551.77             | 0.177                            | 3232.43             | 572.62              |
| A_68_P32121689 | chr19:42593058-42593107                           | NM_177464:-212     | D19Ert4386e   | PROMOTER               | 0.219                                           | 0.463                            | 1829.26             | 847.56              | 0.101                            | 1380.23             | 139.96              |
| A_68_P32121691 | chr19:42593347-42593391                           | NM_177464:74       | D19Ert4386e   | INSIDE                 | 0.292                                           | 0.582                            | 2611.01             | 1518.40             | 0.170                            | 1878.54             | 318.97              |
| A_68_P32224193 | chr19:60302406-60302450                           | NM_029648:172      | D19Ert473e    | INSIDE                 | 0.155                                           | 0.696                            | 1366.16             | 951.17              | 0.108                            | 1088.68             | 117.33              |
| A_68_P32145202 | chr19:46728964-46729014                           | NM_001177813:31098 | D19Wsu162e    | INSIDE                 | 0.605                                           | 3.450                            | 2587.61             | 8926.64             | 2.086                            | 1851.03             | 3860.42             |
| A_68_P20166296 | chr1:39592351-39592396                            | NM_028043:-273     | D1Bwg0212e    | PROMOTER               | 0.118                                           | 0.686                            | 1771.19             | 1215.27             | 0.081                            | 1484.78             | 120.16              |
| A_68_P26132332 | chr8:107748862-107748908                          | NM_145604:-203     | D230025D16Rik | PROMOTER               | 0.135                                           | 0.694                            | 1698.26             | 1178.06             | 0.094                            | 1288.11             | 120.64              |
| A_68_P21566329 | chr2:118640037-118640081                          | NM_026412:320      | D2Ert4750e    | INSIDE                 | 0.443                                           | 1.588                            | 15642.42            | 24845.41            | 0.703                            | 10913.54            | 7672.78             |
| A_68_P21489013 | chr2:104249944-104249988                          | NM_001033347:525   | D430041D05Rik | INSIDE                 | 0.186                                           | 0.631                            | 2467.55             | 1556.27             | 0.117                            | 1679.45             | 196.91              |
| A_68_P29134764 | chr13:72761714-72761758                           | NR_030701:4276     | D430050G20    | INSIDE                 | 0.492                                           | 0.716                            | 1701.25             | 1217.58             | 0.352                            | 1327.54             | 467.01              |
| A_68_P29134804 | chr13:72766185-72766229                           | NR_030701:-194     | D430050G20    | DIVERGENT_PROMOTER     | 0.534                                           | 0.472                            | 2227.09             | 1050.28             | 0.252                            | 1665.29             | 419.72              |
| A_68_P23362366 | chr4:140695171-140695215                          | NM_001025608:519   | D4Ert422e     | INSIDE                 | 0.229                                           | 0.487                            | 2705.91             | 1319.03             | 0.112                            | 2048.62             | 229.04              |

| ProbeName      | Target position of probe on CpG island microarray | TargetID           | GeneSymbol    | CpG island Description | Ratio of relative methylation (TiO2-NP/Vehicle) | Sham group                       |                     |                     | TiO <sub>2</sub> -H group        |                     |                     |
|----------------|---------------------------------------------------|--------------------|---------------|------------------------|-------------------------------------------------|----------------------------------|---------------------|---------------------|----------------------------------|---------------------|---------------------|
|                |                                                   |                    |               |                        |                                                 | Relative methylation (Cy-5/Cy-3) | Cy-3 signal (Input) | Cy-5 signal (MeDIP) | Relative methylation (Cy-5/Cy-3) | Cy-3 signal (Input) | Cy-5 signal (MeDIP) |
| A_68_P23362368 | chr4:140695411-140695455                          | NM_001025608:279   | D4Erd22e      | INSIDE                 | 0.143                                           | 0.680                            | 1498.73             | 1019.43             | 0.097                            | 1202.61             | 117.16              |
| A_68_P23362370 | chr4:140695629-140695673                          | NM_001025608:61    | D4Erd22e      | INSIDE                 | 0.359                                           | 0.621                            | 2261.43             | 1403.38             | 0.223                            | 1703.32             | 379.66              |
| A_68_P23241428 | chr4:118293645-118293692                          | NR_029469:-5340    | D4Erd617e     | PROMOTER               | 0.575                                           | 0.694                            | 1313.45             | 911.38              | 0.399                            | 963.78              | 384.26              |
| A_68_P27155060 | chr10:55948706-55948750                           | NM_001033385:-233  | D630037F22Rik | PROMOTER               | 0.601                                           | 0.666                            | 895.17              | 596.40              | 0.400                            | 671.00              | 268.64              |
| A_68_P24775469 | chr6:116158491-116158535                          | NM_026585:462      | D6Wsu116e     | INSIDE                 | 0.634                                           | 0.541                            | 1295.52             | 700.46              | 0.343                            | 1087.33             | 372.83              |
| A_68_P23262654 | chr4:123088662-123088706                          | NM_001167918:470   | D830031N03Rik | INSIDE                 | 0.233                                           | 0.439                            | 1564.50             | 686.89              | 0.102                            | 1135.67             | 116.27              |
| A_68_P23262655 | chr4:123088845-123088889                          | NM_001167918:288   | D830031N03Rik | INSIDE                 | 0.201                                           | 0.680                            | 2105.68             | 1432.35             | 0.137                            | 1569.54             | 214.32              |
| A_68_P23262660 | chr4:123089459-123089503                          | NM_001167918:-326  | D830031N03Rik | PROMOTER               | 0.248                                           | 0.563                            | 1842.75             | 1037.08             | 0.140                            | 1442.59             | 201.73              |
| A_68_P26018981 | chr8:86773349-86773396                            | NM_001007571:288   | D8Erd738e     | INSIDE                 | 0.302                                           | 0.479                            | 1548.80             | 742.58              | 0.145                            | 1177.15             | 170.63              |
| A_68_P25783726 | chr8:37158263-37158317                            | NM_172911:409      | D8Erd82e      | INSIDE                 | 0.248                                           | 0.643                            | 896.11              | 575.93              | 0.159                            | 750.27              | 119.60              |
| A_68_P25409556 | chr7:116847071-116847115                          | NM_020616:-158     | D930014E17Rik | PROMOTER               | 0.384                                           | 0.502                            | 2548.77             | 1279.57             | 0.193                            | 1928.95             | 371.99              |
| A_68_P22288630 | chr3:83844564-83844615                            | NM_172681:-506     | D930015E06Rik | PROMOTER               | 0.511                                           | 0.600                            | 1416.59             | 850.62              | 0.307                            | 1108.94             | 340.37              |
| A_68_P27504659 | chr10:121079155-121079199                         | NM_177335:420      | D930020B18Rik | INSIDE                 | 0.153                                           | 0.702                            | 2104.99             | 1478.60             | 0.108                            | 1535.01             | 165.34              |
| A_68_P27795128 | chr11:51463862-51463906                           | NR_027958:-571     | D930048N14Rik | PROMOTER               | 0.182                                           | 0.468                            | 1738.94             | 813.16              | 0.085                            | 1365.94             | 116.28              |
| A_68_P27795130 | chr11:51464039-51464083                           | NR_027958:-395     | D930048N14Rik | PROMOTER               | 0.063                                           | 0.712                            | 3868.01             | 2755.52             | 0.045                            | 2649.21             | 119.65              |
| A_68_P27795131 | chr11:51464219-51464263                           | NR_027958:-215     | D930048N14Rik | PROMOTER               | 0.463                                           | 0.509                            | 1038.22             | 528.74              | 0.236                            | 791.80              | 186.73              |
| A_68_P28528482 | chr12:72932824-72932868                           | NM_026102:782      | Daam1         | INSIDE                 | 0.286                                           | 0.443                            | 1250.67             | 554.25              | 0.127                            | 919.50              | 116.72              |
| A_68_P29987885 | chr15:6336369-6336413                             | NM_001037905:-357  | Dab2          | PROMOTER               | 0.191                                           | 0.683                            | 1021.79             | 698.10              | 0.131                            | 899.71              | 117.67              |
| A_68_P21134666 | chr2:35477528-35477572                            | NM_001114124:50    | Dab2ip        | INSIDE                 | 0.289                                           | 0.413                            | 1276.03             | 527.55              | 0.119                            | 1055.63             | 126.06              |
| A_68_P21134955 | chr2:35517597-35517641                            | NM_001114124:40118 | Dab2ip        | INSIDE                 | 0.126                                           | 0.466                            | 3157.98             | 1473.09             | 0.059                            | 2508.24             | 147.00              |
| A_68_P28525478 | chr12:72411253-72411297                           | NM_001190466:404   | Dact1         | INSIDE                 | 0.274                                           | 0.603                            | 1095.25             | 660.89              | 0.165                            | 781.86              | 129.22              |
| A_68_P31058439 | chr17:14340006-14340050                           | NM_172826:810      | Dact2         | INSIDE                 | 0.477                                           | 0.524                            | 1451.59             | 760.53              | 0.250                            | 1301.74             | 325.01              |
| A_68_P29611635 | chr14:54873344-54873388                           | NM_001113358:238   | Dad1          | INSIDE                 | 0.366                                           | 0.544                            | 2468.07             | 1343.80             | 0.199                            | 1980.63             | 394.71              |
| A_68_P26815510 | chr9:108472099-108472144                          | NM_026378:-101     | Dalrd3        | PROMOTER               | 0.340                                           | 0.353                            | 2690.95             | 951.19              | 0.120                            | 2178.95             | 261.88              |
| A_68_P30113000 | chr15:31153773-31153829                           | NM_146057:-339     | Dap           | PROMOTER               | 0.430                                           | 0.513                            | 1044.05             | 536.10              | 0.221                            | 821.01              | 181.12              |
| A_68_P30113001 | chr15:31153906-31153950                           | NM_146057:-211     | Dap           | PROMOTER               | 0.255                                           | 0.454                            | 1495.20             | 678.79              | 0.116                            | 1103.09             | 127.77              |
| A_68_P22316449 | chr3:88754686-88754730                            | NM_001164533:-504  | Dap3          | PROMOTER               | 0.332                                           | 0.575                            | 2457.68             | 1412.69             | 0.191                            | 2067.19             | 394.06              |
| A_68_P29086263 | chr13:60704015-60704059                           | NM_134062:465      | Dapk1         | INSIDE                 | 0.452                                           | 0.621                            | 1345.19             | 834.79              | 0.281                            | 1021.44             | 286.60              |
| A_68_P26591484 | chr9:66005801-66005855                            | NM_010019:-204     | Dapk2         | PROMOTER               | 0.118                                           | 1.566                            | 4337.79             | 6795.09             | 0.185                            | 2827.90             | 524.49              |
| A_68_P26591487 | chr9:66006201-66006245                            | NM_010019:190      | Dapk2         | INSIDE                 | 0.104                                           | 0.727                            | 2279.42             | 1657.08             | 0.076                            | 1592.45             | 120.73              |
| A_68_P27287961 | chr10:80645653-80645705                           | NM_001190474:-73   | Dapk3         | PROMOTER               | 0.215                                           | 0.593                            | 1201.87             | 712.63              | 0.127                            | 965.21              | 122.92              |
| A_68_P27288000 | chr10:80652951-80652995                           | NM_007828:6310     | Dapk3         | INSIDE                 | 0.327                                           | 1.782                            | 1669.49             | 2975.08             | 0.583                            | 1158.49             | 674.86              |
| A_68_P20600402 | chr1:130313507-130313551                          | NM_177445:465      | Dars          | INSIDE                 | 0.325                                           | 0.686                            | 1909.72             | 1310.50             | 0.223                            | 1426.18             | 317.99              |
| A_68_P20600403 | chr1:130313627-130313671                          | NM_177445:345      | Dars          | INSIDE                 | 0.520                                           | 0.421                            | 1579.20             | 664.11              | 0.219                            | 1326.39             | 289.93              |
| A_68_P20600404 | chr1:130313816-130313860                          | NM_177445:155      | Dars          | INSIDE                 | 0.441                                           | 0.641                            | 3398.23             | 2177.34             | 0.283                            | 2341.08             | 662.18              |
| A_68_P31150909 | chr17:34045790-34045846                           | NM_007829:-571     | Daxx          | PROMOTER               | 0.158                                           | 0.468                            | 2184.09             | 1023.15             | 0.074                            | 1585.86             | 117.42              |
| A_68_P31150915 | chr17:34046487-34046531                           | NM_001199733:-37   | Daxx          | PROMOTER               | 0.036                                           | 1.513                            | 3355.42             | 5076.31             | 0.054                            | 2218.99             | 120.83              |
| A_68_P30486705 | chr15:100445276-100445320                         | NM_011873:-794     | Dazap2        | PROMOTER               | 0.507                                           | 0.408                            | 1286.53             | 524.76              | 0.207                            | 1011.88             | 209.35              |
| A_68_P22998987 | chr4:68614912-68614956                            | NM_019967:497      | Dbc1          | INSIDE                 | 0.582                                           | 0.588                            | 4040.92             | 2377.58             | 0.343                            | 2851.93             | 976.91              |
| A_68_P22998988 | chr4:68615056-68615100                            | NM_019967:353      | Dbc1          | INSIDE                 | 0.626                                           | 0.560                            | 1044.33             | 584.64              | 0.351                            | 699.53              | 245.32              |
| A_68_P22998989 | chr4:68615175-68615219                            | NM_019967:235      | Dbc1          | INSIDE                 | 0.344                                           | 0.506                            | 1069.98             | 541.88              | 0.174                            | 790.43              | 137.54              |
| A_68_P23467995 | chr5:8422471-8422515                              | NM_001190717:224   | Dbf4          | INSIDE                 | 0.301                                           | 0.385                            | 1346.98             | 517.97              | 0.116                            | 1040.47             | 120.50              |
| A_68_P26240284 | chr8:126038626-126038670                          | NM_001170976:707   | Dbndd1        | INSIDE                 | 0.291                                           | 0.626                            | 2142.22             | 1340.42             | 0.182                            | 1685.82             | 306.92              |
| A_68_P26240285 | chr8:126038733-126038778                          | NM_001170976:600   | Dbndd1        | INSIDE                 | 0.311                                           | 0.647                            | 2796.26             | 1808.64             | 0.201                            | 2111.46             | 424.65              |

| ProbeName      | Target position of probe on CpG island microarray | TargetID           | GeneSymbol | CpG island Description | Ratio of relative methylation (TiO2-NP/Vehicle) | Sham group                       |                     |                     | TiO2-H group                     |                     |                     |
|----------------|---------------------------------------------------|--------------------|------------|------------------------|-------------------------------------------------|----------------------------------|---------------------|---------------------|----------------------------------|---------------------|---------------------|
|                |                                                   |                    |            |                        |                                                 | Relative methylation (Cy-5/Cy-3) | Cy-3 signal (Input) | Cy-5 signal (MeDIP) | Relative methylation (Cy-5/Cy-3) | Cy-3 signal (Input) | Cy-5 signal (MeDIP) |
| A_68_P26240286 | chr8:126038854-126038898                          | NM_001170976:479   | Dbdd1      | INSIDE                 | 0.468                                           | 0.633                            | 1393.98             | 881.80              | 0.296                            | 1074.10             | 317.89              |
| A_68_P21818148 | chr2:164311684-164311728                          | NM_026797:-248     | Dbdd2      | PROMOTER               | 0.353                                           | 0.450                            | 1293.28             | 582.22              | 0.159                            | 1044.82             | 166.10              |
| A_68_P21818155 | chr2:164312484-164312528                          | NM_001048229:-1104 | Dbdd2      | PROMOTER               | 0.365                                           | 0.680                            | 1143.31             | 777.68              | 0.249                            | 900.59              | 223.81              |
| A_68_P27564954 | chr11:5688709-5688754                             | NM_001146308:246   | Dbnl       | INSIDE                 | 0.247                                           | 0.504                            | 2049.45             | 1033.33             | 0.124                            | 1644.25             | 204.69              |
| A_68_P27564953 | chr11:56888605-56888649                           | NM_001146308:141   | Dbnl       | INSIDE                 | 0.670                                           | 0.695                            | 2021.36             | 1403.86             | 0.465                            | 1567.56             | 728.93              |
| A_68_P25094588 | chr7:52960776-52960821                            | NM_016974:182      | Dbp        | INSIDE                 | 0.296                                           | 0.354                            | 1557.36             | 551.37              | 0.105                            | 1140.67             | 119.71              |
| A_68_P25094601 | chr7:52962152-52962196                            | NM_016974:1558     | Dbp        | INSIDE                 | 0.508                                           | 0.503                            | 1957.27             | 984.22              | 0.255                            | 1589.42             | 405.91              |
| A_68_P25113816 | chr7:56890828-56890872                            | NM_001005232:1355  | Dbx1       | INSIDE                 | 0.567                                           | 0.631                            | 828.80              | 522.87              | 0.358                            | 700.60              | 250.47              |
| A_68_P25113824 | chr7:56891950-56892001                            | NM_001005232:230   | Dbx1       | INSIDE                 | 0.061                                           | 1.479                            | 4110.71             | 6079.61             | 0.090                            | 2549.02             | 229.67              |
| A_68_P30459325 | chr15:95485192-95485236                           | NM_207533:-12      | Dbx2       | PROMOTER               | 0.471                                           | 0.699                            | 1706.24             | 1192.21             | 0.329                            | 1140.96             | 375.23              |
| A_68_P22882386 | chr4:45355486-45355530                            | NM_153167:536      | Dcaf10     | INSIDE                 | 0.141                                           | 0.673                            | 1928.95             | 1298.60             | 0.095                            | 1355.43             | 128.66              |
| A_68_P22882387 | chr4:45355569-45355613                            | NM_153167:618      | Dcaf10     | INSIDE                 | 0.360                                           | 0.511                            | 1542.50             | 788.61              | 0.184                            | 1163.88             | 214.04              |
| A_68_P29618485 | chr14:56179012-56179056                           | NM_001199009:-725  | Dcaf11     | PROMOTER               | 0.166                                           | 0.603                            | 1791.88             | 1081.12             | 0.100                            | 1229.70             | 123.35              |
| A_68_P29618486 | chr14:56179164-56179210                           | NM_001199009:-573  | Dcaf11     | PROMOTER               | 0.175                                           | 0.715                            | 2883.56             | 2062.36             | 0.125                            | 2143.86             | 267.81              |
| A_68_P22861616 | chr4:41261724-41261768                            | NM_026893:188      | Dcaf12     | INSIDE                 | 0.481                                           | 0.699                            | 1489.47             | 1040.41             | 0.336                            | 1226.08             | 411.88              |
| A_68_P22861618 | chr4:41261982-41262026                            | NM_026893:-70      | Dcaf12     | PROMOTER               | 0.169                                           | 0.636                            | 1582.37             | 1006.29             | 0.108                            | 1066.36             | 114.66              |
| A_68_P32351253 | chrX:42143286-42143330                            | NM_001190718:30    | Dcaf121    | INSIDE                 | 0.112                                           | 1.381                            | 1695.79             | 2341.11             | 0.155                            | 744.88              | 115.23              |
| A_68_P21317255 | chr2:70893877-70893924                            | NM_001165982:100   | Dcaf17     | INSIDE                 | 0.150                                           | 0.661                            | 1606.01             | 1062.03             | 0.099                            | 1230.69             | 121.85              |
| A_68_P28593178 | chr12:84861329-84861374                           | NM_030246:-64      | Dcaf4      | PROMOTER               | 0.509                                           | 0.659                            | 1175.40             | 774.41              | 0.336                            | 951.78              | 319.41              |
| A_68_P28593179 | chr12:84861421-84861470                           | NM_001165256:-5553 | Dcaf4      | PROMOTER               | 0.291                                           | 0.541                            | 1017.28             | 550.51              | 0.157                            | 825.27              | 129.77              |
| A_68_P20794594 | chr1:167389733-167389777                          | NM_028759:840      | Dcaf6      | INSIDE                 | 0.245                                           | 0.493                            | 1247.80             | 615.17              | 0.121                            | 999.50              | 120.48              |
| A_68_P20794596 | chr1:167389914-167389958                          | NM_028759:658      | Dcaf6      | INSIDE                 | 0.162                                           | 0.535                            | 1923.31             | 1029.17             | 0.087                            | 1345.78             | 116.58              |
| A_68_P28099221 | chr11:105898542-105898586                         | NM_027946:379      | Dcaf7      | INSIDE                 | 0.184                                           | 0.534                            | 1674.37             | 894.36              | 0.098                            | 1210.96             | 119.27              |
| A_68_P20831243 | chr1:174078348-174078392                          | NM_153555:225      | Dcaf8      | INSIDE                 | 0.180                                           | 0.543                            | 1808.79             | 982.31              | 0.098                            | 1229.52             | 120.15              |
| A_68_P20831244 | chr1:174078454-174078498                          | NM_153555:331      | Dcaf8      | INSIDE                 | 0.457                                           | 0.637                            | 1517.09             | 966.18              | 0.291                            | 1265.46             | 368.01              |
| A_68_P30791338 | chr16:58408465-58408509                           | NM_028523:-161     | Dcbld2     | PROMOTER               | 0.206                                           | 0.524                            | 3810.82             | 1998.41             | 0.108                            | 2860.03             | 308.87              |
| A_68_P28890407 | chr13:25147770-25147817                           | NM_001195617:-79   | Dcdc2a     | PROMOTER               | 0.180                                           | 0.432                            | 1824.85             | 789.13              | 0.078                            | 1513.07             | 117.75              |
| A_68_P28890408 | chr13:25147877-25147921                           | NM_001195617:26    | Dcdc2a     | INSIDE                 | 0.228                                           | 0.634                            | 1612.26             | 1022.62             | 0.145                            | 1252.37             | 181.08              |
| A_68_P23873911 | chr5:89193834-89193878                            | NM_007832:-181     | Dck        | PROMOTER               | 0.195                                           | 0.548                            | 1875.09             | 1027.72             | 0.107                            | 1519.10             | 162.08              |
| A_68_P22305771 | chr3:86723508-86723553                            | NM_001195496:1276  | Dclk2      | INSIDE                 | 0.442                                           | 0.524                            | 1049.98             | 550.62              | 0.232                            | 924.09              | 214.13              |
| A_68_P22305779 | chr3:86724403-86724447                            | NM_001195496:382   | Dclk2      | INSIDE                 | 0.539                                           | 0.310                            | 2021.40             | 626.65              | 0.167                            | 1718.49             | 286.96              |
| A_68_P29506061 | chr14:31292780-31292824                           | NM_133761:52       | Dcp1a      | INSIDE                 | 0.255                                           | 0.561                            | 1187.63             | 666.14              | 0.143                            | 937.02              | 134.17              |
| A_68_P29506063 | chr14:31292967-31293011                           | NM_133761:238      | Dcp1a      | INSIDE                 | 0.374                                           | 0.704                            | 1577.12             | 1110.64             | 0.264                            | 1229.62             | 324.21              |
| A_68_P29506064 | chr14:31293149-31293193                           | NM_133761:420      | Dcp1a      | INSIDE                 | 0.411                                           | 0.548                            | 1594.27             | 873.20              | 0.225                            | 1172.68             | 263.71              |
| A_68_P24791601 | chr6:119125187-119125231                          | NM_001033379:-62   | Dcp1b      | PROMOTER               | 0.632                                           | 0.555                            | 1294.89             | 718.25              | 0.351                            | 1091.87             | 382.79              |
| A_68_P31666410 | chr18:44540001-44540048                           | NM_027490:-129     | Dcp2       | PROMOTER               | 0.230                                           | 0.612                            | 1102.95             | 674.76              | 0.141                            | 869.71              | 122.60              |
| A_68_P31666413 | chr18:44540296-44540340                           | NM_027490:165      | Dcp2       | INSIDE                 | 0.419                                           | 0.438                            | 2832.24             | 1241.26             | 0.184                            | 2037.69             | 374.49              |
| A_68_P31666414 | chr18:44540418-44540462                           | NM_027490:287      | Dcp2       | INSIDE                 | 0.403                                           | 0.471                            | 1722.26             | 811.15              | 0.190                            | 1330.43             | 252.26              |
| A_68_P22318793 | chr3:89154296-89154340                            | NM_029974:14843    | Dcst1      | INSIDE                 | 0.350                                           | 0.467                            | 1404.13             | 655.56              | 0.163                            | 1222.06             | 199.72              |
| A_68_P31751922 | chr18:60686064-60686108                           | NM_026302:212      | Dctn4      | INSIDE                 | 0.659                                           | 0.611                            | 1171.49             | 715.57              | 0.403                            | 921.77              | 371.06              |
| A_68_P25477510 | chr7:129276573-129276617                          | NM_021608:40       | Dctn5      | INSIDE                 | 0.362                                           | 0.494                            | 1506.41             | 744.10              | 0.179                            | 1229.40             | 219.58              |
| A_68_P25504836 | chr7:134404187-134404231                          | NM_023203:-27      | Dctpp1     | PROMOTER               | 0.213                                           | 0.634                            | 1960.28             | 1242.27             | 0.135                            | 1478.54             | 199.20              |
| A_68_P25667343 | chr8:13288388-13288432                            | NM_001024504:-284  | Dcun1d2    | PROMOTER               | 0.244                                           | 0.326                            | 1894.86             | 616.97              | 0.079                            | 1556.70             | 123.69              |
| A_68_P23797904 | chr5:73881900-73881944                            | NM_001190733:-342  | Dcun1d4    | PROMOTER               | 0.583                                           | 0.535                            | 1183.96             | 633.58              | 0.312                            | 948.80              | 296.23              |



| ProbeName      | Target position of probe on CpG island microarray | TargetID          | GeneSymbol | CpG island Description | Ratio of relative methylation (TiO2-NP/Vehicle) | Sham group                       |                     |                     | TiO <sub>2</sub> -H group        |                     |                     |
|----------------|---------------------------------------------------|-------------------|------------|------------------------|-------------------------------------------------|----------------------------------|---------------------|---------------------|----------------------------------|---------------------|---------------------|
|                |                                                   |                   |            |                        |                                                 | Relative methylation (Cy-5/Cy-3) | Cy-3 signal (Input) | Cy-5 signal (MeDIP) | Relative methylation (Cy-5/Cy-3) | Cy-3 signal (Input) | Cy-5 signal (MeDIP) |
| A_68_P23797907 | chr5:73882297-73882341                            | NM_001190733:54   | Dcun1d4    | INSIDE                 | 0.269                                           | 0.510                            | 1858.99             | 948.19              | 0.137                            | 1504.47             | 206.78              |
| A_68_P23797908 | chr5:73882402-73882446                            | NM_001190733:160  | Dcun1d4    | INSIDE                 | 0.107                                           | 0.495                            | 3141.07             | 1554.79             | 0.053                            | 2306.55             | 121.67              |
| A_68_P28186436 | chr11:120588411-120588455                         | NM_026428:163     | Dcxr       | INSIDE                 | 0.167                                           | 0.732                            | 3076.87             | 2253.17             | 0.122                            | 2260.95             | 276.71              |
| A_68_P31951638 | chr19:10679902-10679946                           | NM_015735:-190    | Ddb1       | DIVERGENT_PROMOTER     | 0.261                                           | 0.460                            | 2234.92             | 1027.13             | 0.120                            | 1698.49             | 204.09              |
| A_68_P21421465 | chr2:91076866-91076910                            | NM_028119:335     | Ddb2       | INSIDE                 | 0.260                                           | 0.573                            | 1487.24             | 852.56              | 0.149                            | 1141.67             | 170.00              |
| A_68_P21421467 | chr2:91077045-91077089                            | NM_028119:157     | Ddb2       | INSIDE                 | 0.415                                           | 0.481                            | 2729.92             | 1314.31             | 0.200                            | 1977.93             | 395.17              |
| A_68_P29571975 | chr14:46276736-46276780                           | NM_001039106:1060 | Ddhd1      | INSIDE                 | 0.395                                           | 0.513                            | 2910.02             | 1493.49             | 0.203                            | 2124.93             | 430.75              |
| A_68_P27535081 | chr10:126727643-126727687                         | NM_007837:-184    | Ddit3      | DIVERGENT_PROMOTER     | 0.217                                           | 0.702                            | 2155.36             | 1513.65             | 0.152                            | 1507.48             | 229.87              |
| A_68_P27171637 | chr10:59414321-59414365                           | NM_029083:176     | Ddit4      | INSIDE                 | 0.438                                           | 0.426                            | 1369.55             | 584.01              | 0.187                            | 1046.06             | 195.23              |
| A_68_P27171638 | chr10:59414463-59414507                           | NM_029083:34      | Ddit4      | INSIDE                 | 0.296                                           | 0.266                            | 2024.13             | 537.73              | 0.079                            | 1482.62             | 116.59              |
| A_68_P27171640 | chr10:59414686-59414730                           | NM_029083:-190    | Ddit4      | PROMOTER               | 0.643                                           | 0.621                            | 1703.05             | 1058.42             | 0.400                            | 1477.74             | 590.80              |
| A_68_P27171642 | chr10:59414981-59415025                           | NM_029083:-484    | Ddit4      | PROMOTER               | 0.152                                           | 0.481                            | 2143.31             | 1031.59             | 0.073                            | 1604.35             | 117.23              |
| A_68_P30476581 | chr15:98635925-98635969                           | NM_001013741:2410 | Ddn        | INSIDE                 | 0.370                                           | 0.477                            | 1136.62             | 541.64              | 0.176                            | 853.54              | 150.62              |
| A_68_P30476587 | chr15:98636550-98636594                           | NM_001013741:1784 | Ddn        | INSIDE                 | 0.156                                           | 0.636                            | 1771.26             | 1126.18             | 0.099                            | 1304.68             | 129.63              |
| A_68_P30476595 | chr15:98637338-98637382                           | NM_001013741:996  | Ddn        | INSIDE                 | 0.587                                           | 0.527                            | 1055.42             | 556.17              | 0.309                            | 607.30              | 187.81              |
| A_68_P31160531 | chr17:35837972-35838016                           | NM_001198833:-459 | Ddr1       | PROMOTER               | 0.512                                           | 0.598                            | 2415.69             | 1445.06             | 0.306                            | 1771.13             | 542.49              |
| A_68_P21631052 | chr2:130490403-130490447                          | NM_029832:-43     | Ddrgk1     | DIVERGENT_PROMOTER     | 0.563                                           | 0.664                            | 1731.04             | 1148.78             | 0.374                            | 1368.53             | 511.45              |
| A_68_P28248079 | chr12:13255873-13255917                           | NM_134040:86      | Ddx1       | INSIDE                 | 0.259                                           | 0.410                            | 1363.21             | 558.60              | 0.106                            | 1130.66             | 120.11              |
| A_68_P26519508 | chr9:53056259-53056305                            | NM_029936:-65     | Ddx10      | PROMOTER               | 0.193                                           | 0.701                            | 2583.81             | 1810.45             | 0.135                            | 2035.72             | 275.47              |
| A_68_P26519509 | chr9:53056349-53056393                            | NM_029936:-153    | Ddx10      | PROMOTER               | 0.653                                           | 0.537                            | 1522.99             | 817.41              | 0.351                            | 1233.91             | 432.66              |
| A_68_P20567558 | chr1:123464212-123464256                          | NM_025860:323     | Ddx18      | INSIDE                 | 0.643                                           | 0.666                            | 1561.56             | 1039.62             | 0.428                            | 1340.21             | 573.95              |
| A_68_P22398584 | chr3:105490057-105490101                          | NM_017397:411     | Ddx20      | INSIDE                 | 0.623                                           | 0.625                            | 955.34              | 596.94              | 0.389                            | 797.36              | 310.28              |
| A_68_P27186920 | chr10:62064870-62064914                           | NM_019553:154     | Ddx21      | INSIDE                 | 0.262                                           | 0.630                            | 1524.72             | 961.32              | 0.165                            | 1259.10             | 207.79              |
| A_68_P30475794 | chr15:98493006-98493053                           | NM_001080981:291  | Ddx23      | INSIDE                 | 0.209                                           | 0.639                            | 2285.80             | 1460.93             | 0.134                            | 1669.03             | 222.94              |
| A_68_P30475796 | chr15:98493283-98493327                           | NM_001080981:16   | Ddx23      | INSIDE                 | 0.579                                           | 0.691                            | 2075.61             | 1433.25             | 0.400                            | 1564.93             | 625.98              |
| A_68_P28697531 | chr12:104664203-104664252                         | NM_020494:-150    | Ddx24      | DIVERGENT_PROMOTER     | 0.225                                           | 0.454                            | 1592.75             | 723.07              | 0.102                            | 1138.88             | 116.34              |
| A_68_P32395899 | chrX:53708448-53708501                            | NM_172779:459     | Ddx26b     | INSIDE                 | 0.039                                           | 5.109                            | 2071.50             | 10583.14            | 0.199                            | 581.42              | 115.63              |
| A_68_P32395900 | chrX:53708549-53708594                            | NM_172779:556     | Ddx26b     | INSIDE                 | 0.037                                           | 3.030                            | 3147.19             | 9535.48             | 0.111                            | 1084.40             | 120.86              |
| A_68_P26016154 | chr8:86238907-86238952                            | NM_197982:-146    | Ddx39      | PROMOTER               | 0.278                                           | 0.612                            | 887.31              | 543.43              | 0.171                            | 680.21              | 115.98              |
| A_68_P26016155 | chr8:86239004-86239050                            | NM_197982:-49     | Ddx39      | PROMOTER               | 0.264                                           | 0.436                            | 1335.39             | 582.13              | 0.115                            | 1047.94             | 120.51              |
| A_68_P26016157 | chr8:86239183-86239227                            | NM_197982:129     | Ddx39      | INSIDE                 | 0.472                                           | 0.548                            | 2210.33             | 1210.20             | 0.259                            | 1900.00             | 491.19              |
| A_68_P26016158 | chr8:86239347-86239391                            | NM_197982:293     | Ddx39      | INSIDE                 | 0.279                                           | 0.607                            | 4677.60             | 2837.73             | 0.169                            | 3307.24             | 559.31              |
| A_68_P26016160 | chr8:86239497-86239541                            | NM_197982:443     | Ddx39      | INSIDE                 | 0.223                                           | 0.669                            | 3311.86             | 2216.78             | 0.149                            | 2072.39             | 309.11              |
| A_68_P31158507 | chr17:35378777-35378821                           | NM_019693:108     | Ddx39b     | INSIDE                 | 0.337                                           | 0.374                            | 2398.36             | 896.01              | 0.126                            | 1755.58             | 220.71              |
| A_68_P31158511 | chr17:35379261-35379306                           | NM_019693:593     | Ddx39b     | INSIDE                 | 0.190                                           | 0.665                            | 1603.70             | 1067.12             | 0.126                            | 1117.59             | 141.27              |
| A_68_P32265724 | chrX:12858330-12858374                            | NM_010028:205     | Ddx3x      | INSIDE                 | 0.540                                           | 0.508                            | 1080.21             | 548.94              | 0.274                            | 445.91              | 122.29              |
| A_68_P29335930 | chr13:113442131-113442175                         | NM_001145885:366  | Ddx4       | INSIDE                 | 0.645                                           | 2.608                            | 2026.92             | 5286.71             | 1.681                            | 1708.42             | 2872.61             |
| A_68_P28100235 | chr11:106078135-106078182                         | NM_028074:-81     | Ddx42      | DIVERGENT_PROMOTER     | 0.267                                           | 0.488                            | 1267.69             | 618.10              | 0.130                            | 900.17              | 117.27              |
| A_68_P28100238 | chr11:106078606-106078650                         | NM_028074:389     | Ddx42      | INSIDE                 | 0.441                                           | 0.655                            | 2883.28             | 1887.26             | 0.288                            | 2163.76             | 624.04              |
| A_68_P28100239 | chr11:106078730-106078775                         | NM_028074:513     | Ddx42      | INSIDE                 | 0.174                                           | 1.479                            | 1082.85             | 1601.05             | 0.258                            | 781.99              | 201.65              |
| A_68_P26659373 | chr9:78243366-78243412                            | NM_001191044:-195 | Ddx43      | PROMOTER               | 0.251                                           | 0.644                            | 883.18              | 569.18              | 0.162                            | 723.28              | 117.06              |
| A_68_P29056202 | chr13:55736711-55736755                           | NM_145975:345     | Ddx46      | INSIDE                 | 0.196                                           | 0.649                            | 4914.27             | 3191.70             | 0.127                            | 3720.38             | 473.03              |
| A_68_P29056203 | chr13:55736834-55736882                           | NM_145975:471     | Ddx46      | INSIDE                 | 0.188                                           | 0.572                            | 1555.52             | 889.72              | 0.107                            | 1118.25             | 120.08              |
| A_68_P25950970 | chr8:72826351-72826395                            | NM_001024922:-21  | Ddx49      | DIVERGENT_PROMOTER     | 0.155                                           | 0.543                            | 2324.12             | 1261.95             | 0.084                            | 1634.63             | 137.64              |

| ProbeName      | Target position of probe on CpG island microarray | TargetID          | GeneSymbol | CpG island Description | Ratio of relative methylation (TiO2-NP/Vehicle) | Sham group                       |                     |                     | TiO <sub>2</sub> -H group        |                     |                     |
|----------------|---------------------------------------------------|-------------------|------------|------------------------|-------------------------------------------------|----------------------------------|---------------------|---------------------|----------------------------------|---------------------|---------------------|
|                |                                                   |                   |            |                        |                                                 | Relative methylation (Cy-5/Cy-3) | Cy-3 signal (Input) | Cy-5 signal (MeDIP) | Relative methylation (Cy-5/Cy-3) | Cy-3 signal (Input) | Cy-5 signal (MeDIP) |
| A_68_P28103522 | chr11:106650003-106650048                         | NM_007840:-217    | Ddx5       | DIVERGENT_PROMOTER     | 0.350                                           | 0.460                            | 1898.40             | 874.02              | 0.161                            | 1414.98             | 228.26              |
| A_68_P27187161 | chr10:62114275-62114319                           | NM_053183:-350    | Ddx50      | PROMOTER               | 0.193                                           | 0.560                            | 1385.79             | 776.04              | 0.108                            | 1152.33             | 124.81              |
| A_68_P27187162 | chr10:62114413-62114457                           | NM_053183:-488    | Ddx50      | PROMOTER               | 0.379                                           | 0.538                            | 1677.62             | 902.00              | 0.204                            | 1276.68             | 260.05              |
| A_68_P23981089 | chr5:111082753-111082797                          | NM_027156:305     | Ddx51      | INSIDE                 | 0.395                                           | 1.415                            | 2235.79             | 3162.99             | 0.559                            | 1524.12             | 851.91              |
| A_68_P24039809 | chr5:121063031-121063075                          | NM_028041:-86     | Ddx54      | DIVERGENT_PROMOTER     | 0.428                                           | 0.505                            | 1103.35             | 556.80              | 0.216                            | 981.25              | 212.11              |
| A_68_P24039813 | chr5:121063452-121063497                          | NM_028041:336     | Ddx54      | INSIDE                 | 0.614                                           | 0.453                            | 1291.47             | 584.56              | 0.278                            | 994.37              | 276.44              |
| A_68_P26468507 | chr9:44412404-44412448                            | NM_001110826:-548 | Ddx6       | PROMOTER               | 0.366                                           | 0.641                            | 1000.24             | 897.94              | 0.235                            | 1104.97             | 259.50              |
| A_68_P25588174 | chr7:148513704-148513752                          | NM_016874:-104    | Deaf1      | DIVERGENT_PROMOTER     | 0.272                                           | 0.531                            | 1000.56             | 531.62              | 0.145                            | 805.47              | 116.56              |
| A_68_P25588255 | chr7:148524764-148524808                          | NR_027770:-104    | Deaf1      | DIVERGENT_PROMOTER     | 0.656                                           | 0.645                            | 1280.83             | 826.61              | 0.423                            | 1036.09             | 438.71              |
| A_68_P22752470 | chr4:15872272-15872316                            | NM_026172:360     | Deer1      | INSIDE                 | 0.361                                           | 0.715                            | 5079.40             | 3632.75             | 0.258                            | 4058.78             | 1046.83             |
| A_68_P20827300 | chr1:173259326-173259370                          | NM_001128609:73   | Dedd       | INSIDE                 | 0.518                                           | 0.364                            | 1930.26             | 703.37              | 0.189                            | 1665.09             | 314.02              |
| A_68_P25009058 | chr7:26004203-26004247                            | NM_207677:654     | Dedd2      | INSIDE                 | 0.520                                           | 0.672                            | 3997.66             | 2685.31             | 0.349                            | 2861.04             | 998.56              |
| A_68_P25009061 | chr7:26004576-26004627                            | NM_207677:277     | Dedd2      | INSIDE                 | 0.241                                           | 0.694                            | 1176.13             | 816.64              | 0.167                            | 846.85              | 141.51              |
| A_68_P25009064 | chr7:26004847-26004897                            | NM_207677:6       | Dedd2      | INSIDE                 | 0.188                                           | 0.446                            | 2132.53             | 951.36              | 0.084                            | 1541.43             | 129.58              |
| A_68_P31121207 | chr7:28360556-28360600                            | NM_027185:15856   | Def6       | INSIDE                 | 0.116                                           | 0.624                            | 2452.55             | 1530.13             | 0.072                            | 1955.89             | 141.70              |
| A_68_P26239891 | chr8:125967011-125967055                          | NM_054046:147     | Def8       | INSIDE                 | 0.205                                           | 0.738                            | 3573.26             | 2635.91             | 0.151                            | 2702.48             | 408.50              |
| A_68_P28729567 | chr12:109940312-109940358                         | NM_001171002:182  | Degs2      | INSIDE                 | 0.209                                           | 1.574                            | 1344.99             | 2117.06             | 0.329                            | 1051.35             | 345.38              |
| A_68_P28729569 | chr12:109940441-109940485                         | NM_001171002:54   | Degs2      | INSIDE                 | 0.432                                           | 0.678                            | 1110.84             | 753.56              | 0.293                            | 925.58              | 271.52              |
| A_68_P29011725 | chr13:47201899-47201943                           | NM_025900:-331    | Dek        | PROMOTER               | 0.279                                           | 0.384                            | 1550.14             | 595.33              | 0.107                            | 1081.93             | 115.95              |
| A_68_P21147278 | chr2:38142391-38142435                            | NM_146122:492     | Dennd1a    | INSIDE                 | 0.557                                           | 0.697                            | 4186.41             | 2917.72             | 0.388                            | 3094.62             | 1200.72             |
| A_68_P24383688 | chr6:39508034-39508079                            | NM_172477:-223    | Dennd2a    | PROMOTER               | 0.407                                           | 0.588                            | 1614.11             | 949.25              | 0.239                            | 1128.93             | 270.38              |
| A_68_P26584122 | chr9:64659329-64659373                            | NM_001162917:533  | Dennd4a    | INSIDE                 | 0.272                                           | 0.598                            | 4331.66             | 2591.77             | 0.163                            | 3237.48             | 527.72              |
| A_68_P26584123 | chr9:64659420-64659464                            | NM_001162917:625  | Dennd4a    | INSIDE                 | 0.246                                           | 0.637                            | 3599.08             | 2292.08             | 0.157                            | 2799.30             | 438.41              |
| A_68_P22324269 | chr3:90068935-90068979                            | NM_201407:-1499   | Dennd4b    | PROMOTER               | 0.521                                           | 0.551                            | 995.76              | 548.92              | 0.287                            | 937.25              | 269.07              |
| A_68_P24058178 | chr5:124356959-124357007                          | NM_026603:-301    | Denr       | PROMOTER               | 0.242                                           | 0.604                            | 1267.63             | 766.02              | 0.146                            | 1001.66             | 146.57              |
| A_68_P24058179 | chr5:124357031-124357075                          | NM_026603:-231    | Denr       | PROMOTER               | 0.591                                           | 0.439                            | 2534.45             | 1111.70             | 0.259                            | 2046.88             | 530.57              |
| A_68_P24058180 | chr5:124357134-124357178                          | NM_026603:-127    | Denr       | PROMOTER               | 0.550                                           | 0.502                            | 3004.11             | 1508.81             | 0.276                            | 2477.22             | 684.61              |
| A_68_P24058184 | chr5:124357527-124357571                          | NM_026603:265     | Denr       | INSIDE                 | 0.592                                           | 0.638                            | 1275.27             | 813.70              | 0.377                            | 1045.85             | 394.79              |
| A_68_P29310804 | chr13:109106277-109106321                         | NM_178683:-232    | Depdc1b    | PROMOTER               | 0.201                                           | 0.653                            | 1030.65             | 673.28              | 0.131                            | 890.20              | 116.69              |
| A_68_P23585887 | chr5:33206388-33206432                            | NM_177786:41      | Depdc5     | INSIDE                 | 0.373                                           | 0.579                            | 1412.99             | 817.53              | 0.216                            | 1269.23             | 273.76              |
| A_68_P30230393 | chr15:54944017-54944061                           | NM_145470:1       | Deptor     | INSIDE                 | 0.480                                           | 0.550                            | 2257.27             | 1242.03             | 0.264                            | 1758.95             | 464.63              |
| A_68_P24880219 | chr6:137703098-137703142                          | NM_172733:23      | Dera       | INSIDE                 | 0.515                                           | 0.390                            | 1596.78             | 622.99              | 0.201                            | 1310.11             | 263.15              |
| A_68_P24880220 | chr6:137703212-137703256                          | NM_172733:137     | Dera       | INSIDE                 | 0.304                                           | 0.674                            | 1331.36             | 896.68              | 0.205                            | 1083.34             | 222.02              |
| A_68_P30244835 | chr15:57723554-57723598                           | NM_024207:397     | Der1l      | INSIDE                 | 0.425                                           | 0.522                            | 2550.26             | 1331.81             | 0.222                            | 2025.95             | 449.64              |
| A_68_P30244838 | chr15:57723989-57724033                           | NM_024207:-37     | Der1l      | PROMOTER               | 0.232                                           | 0.450                            | 1669.72             | 750.80              | 0.104                            | 1165.30             | 121.68              |
| A_68_P27903933 | chr11:70832700-70832744                           | NM_033562:43      | Der12      | INSIDE                 | 0.244                                           | 0.381                            | 1754.26             | 668.50              | 0.093                            | 1381.42             | 128.49              |
| A_68_P27903934 | chr11:70832798-70832842                           | NM_033562:-55     | Der12      | DIVERGENT_PROMOTER     | 0.565                                           | 0.503                            | 2204.32             | 1108.27             | 0.284                            | 1714.27             | 486.74              |
| A_68_P27259217 | chr10:75355978-75356022                           | NM_024440:-142    | Der13      | PROMOTER               | 0.233                                           | 1.510                            | 6147.63             | 9284.02             | 0.353                            | 4088.95             | 1441.76             |
| A_68_P27259221 | chr10:75356293-75356337                           | NM_024440:172     | Der13      | INSIDE                 | 0.465                                           | 0.597                            | 1430.30             | 854.16              | 0.278                            | 1172.62             | 325.43              |
| A_68_P30348812 | chr15:76342113-76342157                           | NM_010046:114     | Dgat1      | INSIDE                 | 0.627                                           | 0.689                            | 2411.73             | 1660.52             | 0.432                            | 1886.27             | 814.94              |
| A_68_P30576344 | chr16:17891528-17891572                           | NM_001109750:271  | Dger2      | INSIDE                 | 0.347                                           | 0.526                            | 2446.86             | 1286.03             | 0.182                            | 1913.85             | 349.27              |
| A_68_P28003586 | chr11:88921355-88921399                           | NM_019505:686     | Dgke       | INSIDE                 | 0.205                                           | 0.488                            | 1550.72             | 756.41              | 0.100                            | 1202.65             | 120.29              |
| A_68_P28003593 | chr11:88922175-88922219                           | NM_019505:-134    | Dgke       | PROMOTER               | 0.091                                           | 0.724                            | 4385.09             | 3174.27             | 0.066                            | 3073.38             | 201.66              |
| A_68_P30599073 | chr16:22656907-22656951                           | NM_138650:376     | Dgkg       | INSIDE                 | 0.208                                           | 0.398                            | 1936.43             | 771.09              | 0.083                            | 1520.32             | 125.83              |

| ProbeName      | Target position of probe on CpG island microarray | TargetID           | GeneSymbol | CpG island Description | Ratio of relative methylation (TiO2-NP/Vehicle) | Sham group                       |                     |                     | TiO <sub>2</sub> -H group        |                     |                     |
|----------------|---------------------------------------------------|--------------------|------------|------------------------|-------------------------------------------------|----------------------------------|---------------------|---------------------|----------------------------------|---------------------|---------------------|
|                |                                                   |                    |            |                        |                                                 | Relative methylation (Cy-5/Cy-3) | Cy-3 signal (Input) | Cy-5 signal (MeDIP) | Relative methylation (Cy-5/Cy-3) | Cy-3 signal (Input) | Cy-5 signal (MeDIP) |
| A_68_P29747596 | chr14:79132794-79132838                           | NM_001081336:-7920 | Dgkh       | PROMOTER               | 0.444                                           | 0.562                            | 3136.63             | 1762.77             | 0.250                            | 2305.16             | 575.59              |
| A_68_P21425684 | chr2:91803378-91803422                            | NM_138306:320      | Dgkz       | INSIDE                 | 0.592                                           | 0.472                            | 1509.86             | 713.20              | 0.280                            | 1290.92             | 361.18              |
| A_68_P21425690 | chr2:91804013-91804057                            | NM_138306:-314     | Dgkz       | PROMOTER               | 0.402                                           | 1.354                            | 2042.05             | 2764.55             | 0.544                            | 1585.34             | 862.03              |
| A_68_P24593884 | chr6:83447860-83447916                            | NM_001162521:9075  | Dguok      | INSIDE                 | 0.149                                           | 1.778                            | 555.57              | 987.75              | 0.264                            | 445.81              | 117.71              |
| A_68_P24593936 | chr6:83456719-83456763                            | NM_001162521:223   | Dguok      | INSIDE                 | 0.551                                           | 0.637                            | 858.23              | 546.91              | 0.351                            | 760.83              | 267.37              |
| A_68_P25603239 | chr7:151016135-151016179                          | NM_007856:7085     | Dhcr7      | INSIDE                 | 0.399                                           | 0.597                            | 1125.54             | 672.50              | 0.238                            | 815.91              | 194.46              |
| A_68_P25093408 | chr7:52744206-52744250                            | NM_027903:-62      | Dhdh       | PROMOTER               | 0.592                                           | 0.591                            | 1981.28             | 1171.77             | 0.350                            | 1605.28             | 562.44              |
| A_68_P30477181 | chr15:98724879-98724923                           | NM_007857:4071     | Dhh        | INSIDE                 | 0.580                                           | 0.550                            | 1153.09             | 634.29              | 0.319                            | 1038.42             | 331.31              |
| A_68_P27941031 | chr11:77845557-77845601                           | NM_183286:-236     | Dhrs13     | PROMOTER               | 0.579                                           | 0.745                            | 3029.23             | 2257.21             | 0.432                            | 2349.80             | 1014.47             |
| A_68_P23379974 | chr4:144482718-144482768                          | NM_011303:-297     | Dhrs3      | PROMOTER               | 0.150                                           | 1.494                            | 2470.32             | 3689.51             | 0.224                            | 1584.09             | 355.10              |
| A_68_P33007791 | chr4_random:128451-128495                         | NM_001033326:18671 | Dhrsx      | INSIDE                 | 0.666                                           | 2.468                            | 7810.77             | 19279.26            | 1.644                            | 5480.38             | 9007.71             |
| A_68_P33008825 | chr4_random:109830-109874                         | NM_001033326:51    | Dhrsx      | INSIDE                 | 0.397                                           | 0.470                            | 1833.30             | 861.33              | 0.186                            | 1457.07             | 271.74              |
| A_68_P26821951 | chr9:110003563-110003607                          | NM_133347:14502    | Dhx30      | INSIDE                 | 0.501                                           | 0.497                            | 1054.41             | 524.01              | 0.249                            | 862.41              | 214.92              |
| A_68_P26822030 | chr9:110019511-110019555                          | NM_133347:-1446    | Dhx30      | PROMOTER               | 0.407                                           | 0.637                            | 1377.60             | 877.71              | 0.260                            | 1241.84             | 322.32              |
| A_68_P27903825 | chr11:70817620-70817664                           | NM_178367:292      | Dhx33      | INSIDE                 | 0.253                                           | 0.384                            | 2082.91             | 800.73              | 0.097                            | 1763.97             | 171.74              |
| A_68_P24066887 | chr5:125914212-125914256                          | NM_203319:184      | Dhx37      | INSIDE                 | 0.564                                           | 0.504                            | 2121.66             | 1068.58             | 0.284                            | 1769.97             | 503.12              |
| A_68_P26157751 | chr8:112089473-112089517                          | NM_178380:7        | Dhx38      | INSIDE                 | 0.384                                           | 0.599                            | 2610.74             | 1564.85             | 0.230                            | 1737.08             | 399.73              |
| A_68_P27991090 | chr11:86620800-86620848                           | NM_026191:338      | Dhx40      | INSIDE                 | 0.197                                           | 0.604                            | 1360.71             | 821.31              | 0.119                            | 990.68              | 118.08              |
| A_68_P27991096 | chr11:86621298-86621342                           | NM_026191:-158     | Dhx40      | PROMOTER               | 0.407                                           | 0.538                            | 1239.12             | 666.15              | 0.219                            | 916.71              | 200.56              |
| A_68_P20726997 | chr1:155334160-155334214                          | NM_007842:604      | Dhx9       | INSIDE                 | 0.196                                           | 0.534                            | 1455.22             | 776.93              | 0.105                            | 1158.21             | 121.50              |
| A_68_P24056167 | chr5:123974295-123974339                          | NM_023232:-143     | Diablo     | PROMOTER               | 0.571                                           | 0.484                            | 2310.52             | 1118.89             | 0.276                            | 1973.22             | 545.19              |
| A_68_P32651796 | chrX:126284437-126284481                          | NM_172493:181      | Diap2      | INSIDE                 | 0.046                                           | 2.019                            | 3296.73             | 6655.66             | 0.094                            | 1263.70             | 118.38              |
| A_68_P32651797 | chrX:126284617-126284662                          | NM_172493:362      | Diap2      | INSIDE                 | 0.114                                           | 1.830                            | 1684.44             | 3083.15             | 0.209                            | 677.82              | 141.66              |
| A_68_P32651800 | chrX:126284923-126284967                          | NM_172493:667      | Diap2      | INSIDE                 | 0.085                                           | 1.796                            | 2452.36             | 4405.13             | 0.154                            | 978.86              | 150.28              |
| A_68_P29787827 | chr14:87540778-87540822                           | NM_019670:121      | Diap3      | INSIDE                 | 0.228                                           | 0.321                            | 2073.67             | 665.05              | 0.073                            | 1605.15             | 117.38              |
| A_68_P29787828 | chr14:87540919-87540963                           | NM_019670:-19      | Diap3      | PROMOTER               | 0.260                                           | 0.445                            | 1272.45             | 566.38              | 0.116                            | 1054.15             | 122.07              |
| A_68_P28705225 | chr12:105989571-105989615                         | NM_148948:570      | Dicer1     | INSIDE                 | 0.549                                           | 0.404                            | 1714.93             | 693.62              | 0.222                            | 1382.82             | 307.15              |
| A_68_P21905657 | chr2:180436282-180436326                          | NM_175551:501      | Dido1      | INSIDE                 | 0.623                                           | 0.561                            | 2040.66             | 1144.36             | 0.349                            | 1441.47             | 503.53              |
| A_68_P21905698 | chr2:180444588-180444638                          | NM_175551:-7807    | Dido1      | PROMOTER               | 0.136                                           | 0.472                            | 2594.30             | 1225.42             | 0.064                            | 1819.21             | 117.19              |
| A_68_P21905703 | chr2:180445288-180445335                          | NM_177852:-607     | Dido1      | DIVERGENT_PROMOTER     | 0.160                                           | 0.625                            | 1566.59             | 979.57              | 0.100                            | 1159.82             | 116.26              |
| A_68_P28737547 | chr12:111517314-111517358                         | NM_172119:-103     | Dio3       | DIVERGENT_PROMOTER     | 0.115                                           | 0.660                            | 1901.27             | 1254.57             | 0.076                            | 1540.42             | 116.86              |
| A_68_P28737548 | chr12:111517382-111517429                         | NM_172119:-34      | Dio3       | DIVERGENT_PROMOTER     | 0.292                                           | 0.621                            | 840.39              | 522.19              | 0.182                            | 664.86              | 120.84              |
| A_68_P28737539 | chr12:111516074-111516118                         | NR_002866:182      | Dio3os     | INSIDE                 | 0.554                                           | 0.557                            | 1383.04             | 769.67              | 0.308                            | 1133.20             | 349.36              |
| A_68_P28737540 | chr12:111516152-111516199                         | NR_002866:103      | Dio3os     | INSIDE                 | 0.324                                           | 0.378                            | 1660.43             | 627.60              | 0.122                            | 1385.18             | 169.57              |
| A_68_P29038492 | chr13:52625955-52625999                           | NM_001024474:229   | Diras2     | INSIDE                 | 0.545                                           | 0.682                            | 4342.23             | 2960.54             | 0.372                            | 3238.56             | 1203.85             |
| A_68_P30672033 | chr16:35768842-35768886                           | NM_153550:578      | Dire2      | INSIDE                 | 0.457                                           | 0.605                            | 1297.65             | 785.52              | 0.277                            | 1184.21             | 327.64              |
| A_68_P30672035 | chr16:35769023-35769067                           | NM_153550:398      | Dire2      | INSIDE                 | 0.592                                           | 0.411                            | 1741.59             | 714.97              | 0.243                            | 1510.92             | 367.51              |
| A_68_P20413587 | chr1:88600174-88600218                            | NM_001172157:-182  | Dis3l2     | PROMOTER               | 0.157                                           | 0.542                            | 1819.73             | 986.39              | 0.085                            | 1376.97             | 117.52              |
| A_68_P20413588 | chr1:88600253-88600297                            | NM_001172157:-104  | Dis3l2     | PROMOTER               | 0.547                                           | 0.626                            | 3588.05             | 2247.88             | 0.343                            | 2757.39             | 945.60              |
| A_68_P26249220 | chr8:127578421-127578465                          | NM_174853:348      | Disc1      | INSIDE                 | 0.626                                           | 0.636                            | 1507.71             | 959.49              | 0.398                            | 1281.30             | 510.18              |
| A_68_P26505085 | chr9:50507371-50507415                            | NM_178118:28697    | Dixdc1     | INSIDE                 | 0.558                                           | 0.489                            | 1050.32             | 513.12              | 0.273                            | 769.66              | 209.88              |
| A_68_P26505265 | chr9:50536331-50536375                            | NM_178118:-263     | Dixdc1     | PROMOTER               | 0.462                                           | 0.709                            | 1369.82             | 971.01              | 0.327                            | 1114.03             | 364.82              |
| A_68_P32470552 | chrX:72341213-72341257                            | NM_001030307:42    | Dkc1       | INSIDE                 | 0.084                                           | 1.365                            | 2697.83             | 3683.43             | 0.114                            | 1045.20             | 119.18              |
| A_68_P25422972 | chr7:119301935-119301979                          | NM_015814:615      | Dkk3       | INSIDE                 | 0.204                                           | 2.165                            | 9130.25             | 19767.68            | 0.443                            | 5681.27             | 2514.80             |

| ProbeName      | Target position of probe on CpG island microarray | TargetID            | GeneSymbol | CpG island Description | Ratio of relative methylation (TiO2-NP/Vehicle) | Sham group                       |                     |                     | TiO <sub>2</sub> -H group        |                     |                     |
|----------------|---------------------------------------------------|---------------------|------------|------------------------|-------------------------------------------------|----------------------------------|---------------------|---------------------|----------------------------------|---------------------|---------------------|
|                |                                                   |                     |            |                        |                                                 | Relative methylation (Cy-5/Cy-3) | Cy-3 signal (Input) | Cy-5 signal (MeDIP) | Relative methylation (Cy-5/Cy-3) | Cy-3 signal (Input) | Cy-5 signal (MeDIP) |
| A_68_P29651206 | chr14:62266896-62266940                           | NR_028264:34292     | Dleu2      | INSIDE                 | 0.644                                           | 0.700                            | 1475.22             | 1033.22             | 0.451                            | 1259.92             | 568.46              |
| A_68_P29651209 | chr14:62267312-62267356                           | NR_028264:33876     | Dleu2      | INSIDE                 | 0.463                                           | 0.361                            | 2229.34             | 804.10              | 0.167                            | 1935.60             | 322.97              |
| A_68_P29651214 | chr14:62267812-62267856                           | NR_028264:33376     | Dleu2      | INSIDE                 | 0.128                                           | 1.640                            | 4837.12             | 7933.72             | 0.210                            | 3150.69             | 661.54              |
| A_68_P29651216 | chr14:62268043-62268087                           | NR_028264:33146     | Dleu2      | INSIDE                 | 0.259                                           | 0.665                            | 1283.83             | 854.01              | 0.172                            | 1162.00             | 200.09              |
| A_68_P29651217 | chr14:62268108-62268159                           | NR_028264:33077     | Dleu2      | INSIDE                 | 0.398                                           | 0.543                            | 1443.25             | 783.46              | 0.216                            | 1158.50             | 250.08              |
| A_68_P29651431 | chr14:62305946-62306001                           | NR_028264:-4763     | Dleu2      | PROMOTER               | 0.200                                           | 0.623                            | 1314.06             | 819.32              | 0.125                            | 978.36              | 122.26              |
| A_68_P29651453 | chr14:62308585-62308640                           | NR_028264:-7402     | Dleu2      | PROMOTER               | 0.626                                           | 0.658                            | 1112.26             | 731.90              | 0.412                            | 960.19              | 395.76              |
| A_68_P29654694 | chr14:62911407-62911451                           | NM_173419:388       | Dleu7      | INSIDE                 | 0.314                                           | 0.609                            | 1151.47             | 700.81              | 0.191                            | 1040.00             | 198.47              |
| A_68_P29654698 | chr14:62911858-62911904                           | NM_173419:-64       | Dleu7      | PROMOTER               | 0.158                                           | 0.599                            | 1463.37             | 877.18              | 0.095                            | 1288.13             | 122.38              |
| A_68_P30648664 | chr16:31663664-31663708                           | NM_007862:-438      | Dlg1       | PROMOTER               | 0.392                                           | 0.458                            | 3597.39             | 1647.10             | 0.180                            | 2613.64             | 469.67              |
| A_68_P30648665 | chr16:31663764-31663808                           | NM_007862:-338      | Dlg1       | PROMOTER               | 0.291                                           | 0.436                            | 1220.85             | 532.57              | 0.127                            | 933.67              | 118.67              |
| A_68_P27898577 | chr11:69834947-69834991                           | NM_001109752:2862   | Dlg4       | INSIDE                 | 0.648                                           | 0.513                            | 1313.67             | 674.23              | 0.333                            | 1020.02             | 339.38              |
| A_68_P31330088 | chr17:71012118-71012162                           | NM_001128181:101054 | Dlgap1     | INSIDE                 | 0.453                                           | 1.496                            | 2328.12             | 3482.04             | 0.678                            | 1758.63             | 1192.07             |
| A_68_P25672259 | chr8:14096757-14096801                            | NM_001145965:904    | Dlgap2     | INSIDE                 | 0.225                                           | 0.657                            | 984.04              | 646.62              | 0.148                            | 783.35              | 115.74              |
| A_68_P29582178 | chr14:48037787-48037833                           | NM_144553:272       | Dlgap5     | INSIDE                 | 0.626                                           | 0.587                            | 1015.43             | 596.15              | 0.368                            | 726.20              | 266.99              |
| A_68_P28732704 | chr12:110691154-110691198                         | NM_001190703:488    | Dlk1       | PROMOTER               | 0.196                                           | 0.561                            | 1425.61             | 799.09              | 0.110                            | 1181.70             | 129.80              |
| A_68_P28732705 | chr12:110691224-110691271                         | NM_001190703:-417   | Dlk1       | PROMOTER               | 0.174                                           | 0.564                            | 1693.86             | 954.75              | 0.098                            | 1255.25             | 123.15              |
| A_68_P28732710 | chr12:110691897-110691941                         | NM_001190703:254    | Dlk1       | INSIDE                 | 0.478                                           | 0.502                            | 2056.95             | 1033.52             | 0.240                            | 1542.30             | 370.33              |
| A_68_P31065256 | chr17:15512298-15512342                           | NM_007865:467       | Dll1       | INSIDE                 | 0.428                                           | 1.381                            | 2803.51             | 3870.71             | 0.591                            | 2321.68             | 1371.13             |
| A_68_P31065259 | chr17:15512604-15512648                           | NM_007865:161       | Dll1       | INSIDE                 | 0.487                                           | 0.468                            | 1288.39             | 603.05              | 0.228                            | 926.33              | 211.00              |
| A_68_P31065263 | chr17:15513198-15513242                           | NM_007865:-433      | Dll1       | PROMOTER               | 0.221                                           | 0.505                            | 1418.02             | 716.55              | 0.112                            | 1091.38             | 121.76              |
| A_68_P31065304 | chr17:15517920-15517964                           | NM_007865:-5155     | Dll1       | PROMOTER               | 0.233                                           | 0.429                            | 2393.26             | 1026.31             | 0.100                            | 1839.54             | 183.79              |
| A_68_P31065305 | chr17:15517994-15518045                           | NM_007865:-5232     | Dll1       | PROMOTER               | 0.519                                           | 0.519                            | 1623.07             | 842.03              | 0.269                            | 1325.33             | 356.95              |
| A_68_P21569027 | chr2:119148109-119148156                          | NM_019454:-3387     | Dll4       | PROMOTER               | 0.237                                           | 0.551                            | 1196.58             | 659.25              | 0.131                            | 921.33              | 120.35              |
| A_68_P21320095 | chr2:71379350-71379394                            | NR_002854:-3424     | Dlx1as     | PROMOTER               | 0.390                                           | 0.546                            | 2383.88             | 1302.44             | 0.213                            | 1831.75             | 390.00              |
| A_68_P21320122 | chr2:71382362-71382406                            | NM_010054:2427      | Dlx2       | INSIDE                 | 0.287                                           | 0.503                            | 1577.81             | 794.03              | 0.145                            | 1323.44             | 191.28              |
| A_68_P21320135 | chr2:71384020-71384064                            | NM_010054:769       | Dlx2       | INSIDE                 | 0.325                                           | 0.585                            | 2056.74             | 1203.82             | 0.190                            | 1438.81             | 273.76              |
| A_68_P21320136 | chr2:71384105-71384149                            | NM_010054:685       | Dlx2       | INSIDE                 | 0.249                                           | 0.479                            | 2446.96             | 1171.31             | 0.119                            | 1782.62             | 212.75              |
| A_68_P28036768 | chr11:94981457-94981501                           | NM_010055:48        | Dlx3       | INSIDE                 | 0.330                                           | 0.663                            | 6824.89             | 4524.71             | 0.219                            | 4438.31             | 970.14              |
| A_68_P28036771 | chr11:94981735-94981779                           | NM_010055:326       | Dlx3       | INSIDE                 | 0.160                                           | 0.694                            | 1430.45             | 992.60              | 0.111                            | 1064.15             | 118.07              |
| A_68_P28036957 | chr11:95006662-95006706                           | NM_007867:431       | Dlx4       | INSIDE                 | 0.281                                           | 0.651                            | 2321.49             | 1510.92             | 0.183                            | 1744.75             | 318.99              |
| A_68_P28036958 | chr11:95006743-95006787                           | NM_007867:351       | Dlx4       | INSIDE                 | 0.485                                           | 0.688                            | 4489.99             | 3088.20             | 0.334                            | 3238.82             | 1080.56             |
| A_68_P24218863 | chr6:6829517-6829561                              | NM_010056:2530      | Dlx5       | INSIDE                 | 0.342                                           | 0.489                            | 2406.66             | 1176.53             | 0.167                            | 1698.33             | 284.26              |
| A_68_P24218883 | chr6:6831846-6831891                              | NM_010056:200       | Dlx5       | INSIDE                 | 0.132                                           | 0.639                            | 1804.65             | 1152.74             | 0.084                            | 1392.22             | 117.51              |
| A_68_P24218884 | chr6:6831933-6831977                              | NM_010056:114       | Dlx5       | INSIDE                 | 0.166                                           | 0.630                            | 1786.61             | 1125.89             | 0.105                            | 1214.20             | 127.35              |
| A_68_P24218731 | chr6:6813573-6813617                              | NM_010057:261       | Dlx6       | INSIDE                 | 0.629                                           | 0.518                            | 3828.75             | 1984.03             | 0.326                            | 3140.88             | 1023.77             |
| A_68_P23236051 | chr4:117354667-117354711                          | NM_023178:142       | Dmap1      | INSIDE                 | 0.348                                           | 0.512                            | 2108.78             | 1079.77             | 0.178                            | 1662.61             | 296.03              |
| A_68_P23226777 | chr4:115609072-115609120                          | NM_001025567:3435   | Dmbx1      | INSIDE                 | 0.267                                           | 0.588                            | 1195.49             | 702.94              | 0.157                            | 928.86              | 145.93              |
| A_68_P23226797 | chr4:115611470-115611514                          | NM_001025567:1039   | Dmbx1      | INSIDE                 | 0.203                                           | 0.604                            | 2027.15             | 1225.38             | 0.123                            | 1562.01             | 191.89              |
| A_68_P23226799 | chr4:115611753-115611802                          | NM_001025567:754    | Dmbx1      | INSIDE                 | 0.279                                           | 0.640                            | 982.15              | 628.68              | 0.179                            | 665.18              | 118.81              |
| A_68_P23226802 | chr4:115612163-115612209                          | NM_001025567:345    | Dmbx1      | INSIDE                 | 0.237                                           | 0.694                            | 1164.16             | 808.42              | 0.164                            | 882.65              | 145.18              |
| A_68_P23226804 | chr4:115612306-115612352                          | NM_001025567:203    | Dmbx1      | INSIDE                 | 0.102                                           | 1.420                            | 1220.94             | 1733.19             | 0.145                            | 802.38              | 116.35              |
| A_68_P32030084 | chr19:25580234-25580278                           | NM_015826:61        | Dmrt1      | INSIDE                 | 0.423                                           | 0.495                            | 2646.19             | 1309.16             | 0.210                            | 2197.89             | 460.46              |
| A_68_P32030085 | chr19:25580326-25580370                           | NM_015826:153       | Dmrt1      | INSIDE                 | 0.494                                           | 0.668                            | 1249.14             | 833.98              | 0.330                            | 999.07              | 329.54              |

| ProbeName      | Target position of probe on CpG island microarray | TargetID          | GeneSymbol | CpG island Description | Ratio of relative methylation (TiO2-NP/Vehicle) | Sham group                       |                     |                     | TiO <sub>2</sub> -H group        |                     |                     |
|----------------|---------------------------------------------------|-------------------|------------|------------------------|-------------------------------------------------|----------------------------------|---------------------|---------------------|----------------------------------|---------------------|---------------------|
|                |                                                   |                   |            |                        |                                                 | Relative methylation (Cy-5/Cy-3) | Cy-3 signal (Input) | Cy-5 signal (MeDIP) | Relative methylation (Cy-5/Cy-3) | Cy-3 signal (Input) | Cy-5 signal (MeDIP) |
| A_68_P32030090 | chr19:25580813-25580857                           | NM_015826:639     | Dmrt1      | INSIDE                 | 0.393                                           | 0.736                            | 4472.71             | 3292.67             | 0.289                            | 3179.73             | 919.43              |
| A_68_P32030091 | chr19:25580881-25580925                           | NM_015826:707     | Dmrt1      | INSIDE                 | 0.377                                           | 0.693                            | 3461.68             | 2397.73             | 0.261                            | 2630.53             | 687.09              |
| A_68_P32031152 | chr19:25747038-25747084                           | NM_145831:160     | Dmrt2      | INSIDE                 | 0.310                                           | 0.686                            | 1388.95             | 952.80              | 0.213                            | 1035.27             | 220.16              |
| A_68_P32030685 | chr19:25680631-25680675                           | NM_177360:-4374   | Dmrt3      | PROMOTER               | 0.203                                           | 0.698                            | 1697.10             | 1184.90             | 0.141                            | 1261.40             | 178.39              |
| A_68_P32030687 | chr19:25680849-25680893                           | NM_177360:-4156   | Dmrt3      | PROMOTER               | 0.262                                           | 0.496                            | 1556.60             | 772.47              | 0.130                            | 1183.93             | 154.18              |
| A_68_P32030716 | chr19:25684536-25684580                           | NM_177360:-468    | Dmrt3      | PROMOTER               | 0.361                                           | 0.667                            | 1409.09             | 939.16              | 0.241                            | 1098.30             | 264.44              |
| A_68_P23203726 | chr4:109650077-109650121                          | NM_172296:-531    | Dmrta2     | PROMOTER               | 0.248                                           | 0.348                            | 1771.24             | 616.01              | 0.086                            | 1394.98             | 120.09              |
| A_68_P23203729 | chr4:109650347-109650391                          | NM_172296:-261    | Dmrta2     | PROMOTER               | 0.432                                           | 0.401                            | 3107.48             | 1247.05             | 0.174                            | 2233.97             | 387.65              |
| A_68_P23203752 | chr4:109652831-109652875                          | NM_172296:2223    | Dmrta2     | INSIDE                 | 0.227                                           | 0.473                            | 1258.70             | 594.89              | 0.107                            | 1156.24             | 123.89              |
| A_68_P23203773 | chr4:109655219-109655263                          | NM_172296:4611    | Dmrta2     | INSIDE                 | 0.526                                           | 0.569                            | 1057.83             | 601.95              | 0.299                            | 879.38              | 263.17              |
| A_68_P23471509 | chr5:9160963-9161011                              | NM_001110327:790  | Dmrtf1     | INSIDE                 | 0.311                                           | 0.645                            | 1452.99             | 937.24              | 0.201                            | 1079.13             | 216.46              |
| A_68_P24991257 | chr7:19661336-19661380                            | NM_010058:-190    | Dmwd       | PROMOTER               | 0.396                                           | 0.616                            | 1112.54             | 684.81              | 0.244                            | 889.48              | 217.03              |
| A_68_P27188615 | chr10:62411987-62412031                           | NM_177372:2232    | Dna2       | INSIDE                 | 0.618                                           | 2.596                            | 910.51              | 2363.28             | 1.605                            | 760.06              | 1220.14             |
| A_68_P28778248 | chr12:119437069-119437113                         | NM_010060:426     | Dnahc11    | INSIDE                 | 0.429                                           | 0.600                            | 1767.16             | 1059.95             | 0.257                            | 1351.87             | 347.71              |
| A_68_P27895681 | chr11:69359967-69360011                           | NM_001081330:2622 | Dnahc2     | INSIDE                 | 0.190                                           | 0.551                            | 1375.31             | 757.70              | 0.104                            | 1123.98             | 117.42              |
| A_68_P26025443 | chr8:88079254-88079298                            | NM_019794:-106    | Dnaja2     | PROMOTER               | 0.618                                           | 0.555                            | 1859.01             | 1031.32             | 0.343                            | 1720.93             | 590.43              |
| A_68_P26527191 | chr9:54546796-54546840                            | NM_021422:-547    | Dnaja4     | PROMOTER               | 0.342                                           | 1.445                            | 3453.02             | 4990.09             | 0.494                            | 2623.13             | 1294.83             |
| A_68_P26527199 | chr9:54547693-54547737                            | NM_021422:349     | Dnaja4     | INSIDE                 | 0.275                                           | 0.556                            | 1005.14             | 558.46              | 0.153                            | 768.88              | 117.48              |
| A_68_P26015687 | chr8:86132654-86132698                            | NM_018808:603     | Dnajb1     | INSIDE                 | 0.605                                           | 0.595                            | 1336.38             | 794.62              | 0.360                            | 1176.46             | 423.12              |
| A_68_P26015688 | chr8:86132717-86132768                            | NM_018808:669     | Dnajb1     | INSIDE                 | 0.198                                           | 0.503                            | 1573.85             | 792.17              | 0.099                            | 1170.32             | 116.43              |
| A_68_P30600193 | chr16:22857790-22857834                           | NM_001190804:-105 | Dnajb11    | DIVERGENT_PROMOTER     | 0.304                                           | 0.577                            | 2072.81             | 1195.30             | 0.176                            | 1427.93             | 250.66              |
| A_68_P30600196 | chr16:22858132-22858176                           | NM_001190804:237  | Dnajb11    | INSIDE                 | 0.442                                           | 0.462                            | 1650.30             | 763.25              | 0.204                            | 1246.41             | 254.85              |
| A_68_P20352840 | chr1:75233023-75233067                            | NM_001159885:-232 | Dnajb2     | PROMOTER               | 0.260                                           | 0.555                            | 1122.62             | 623.32              | 0.145                            | 806.66              | 116.66              |
| A_68_P20352842 | chr1:75233266-75233310                            | NM_001159885:12   | Dnajb2     | INSIDE                 | 0.113                                           | 0.677                            | 2053.90             | 1391.18             | 0.077                            | 1505.54             | 115.35              |
| A_68_P22649279 | chr3:151873278-151873322                          | NM_027287:-37     | Dnajb4     | DIVERGENT_PROMOTER     | 0.369                                           | 0.480                            | 1350.69             | 648.44              | 0.177                            | 1091.22             | 193.15              |
| A_68_P22869096 | chr4:42962948-42962992                            | NM_019874:-2995   | Dnajb5     | PROMOTER               | 0.195                                           | 0.729                            | 3574.50             | 2607.49             | 0.142                            | 2533.01             | 359.98              |
| A_68_P22869099 | chr4:42963311-42963355                            | NM_019874:-2633   | Dnajb5     | PROMOTER               | 0.540                                           | 0.712                            | 1323.06             | 941.75              | 0.384                            | 1081.19             | 415.56              |
| A_68_P28396957 | chr12:45310575-45310620                           | NM_013760:458     | Dnajb9     | INSIDE                 | 0.545                                           | 0.405                            | 1667.74             | 675.83              | 0.221                            | 1374.69             | 303.33              |
| A_68_P28396959 | chr12:45310845-45310889                           | NM_013760:189     | Dnajb9     | INSIDE                 | 0.351                                           | 0.633                            | 1982.31             | 1255.39             | 0.222                            | 1490.06             | 331.30              |
| A_68_P28396961 | chr12:45311078-45311122                           | NM_013760:-45     | Dnajb9     | PROMOTER               | 0.381                                           | 0.457                            | 2172.07             | 993.00              | 0.174                            | 1688.94             | 294.02              |
| A_68_P28396962 | chr12:45311155-45311199                           | NM_013760:-121    | Dnajb9     | PROMOTER               | 0.277                                           | 0.394                            | 1422.76             | 560.34              | 0.109                            | 1067.66             | 116.53              |
| A_68_P23415476 | chr4:151308731-151308775                          | NM_172704:924     | Dnajc11    | INSIDE                 | 0.285                                           | 0.476                            | 1138.93             | 542.64              | 0.136                            | 972.31              | 132.01              |
| A_68_P26790784 | chr9:104164628-104164672                          | NM_001163026:610  | Dnajc13    | INSIDE                 | 0.386                                           | 0.701                            | 1651.99             | 1157.73             | 0.270                            | 1188.76             | 321.22              |
| A_68_P26790786 | chr9:104164871-104164915                          | NM_001163026:368  | Dnajc13    | INSIDE                 | 0.483                                           | 0.425                            | 1834.27             | 778.78              | 0.205                            | 1387.67             | 284.86              |
| A_68_P26790789 | chr9:104165231-104165275                          | NM_001163026:8    | Dnajc13    | INSIDE                 | 0.294                                           | 0.439                            | 2216.01             | 973.37              | 0.129                            | 1782.78             | 230.03              |
| A_68_P27543290 | chr10:128242192-128242236                         | NM_028873:-517    | Dnajc14    | DIVERGENT_PROMOTER     | 0.234                                           | 0.612                            | 1036.99             | 634.30              | 0.143                            | 890.24              | 127.51              |
| A_68_P27543295 | chr10:128242767-128242811                         | NM_028873:57      | Dnajc14    | INSIDE                 | 0.199                                           | 0.511                            | 1583.52             | 809.79              | 0.102                            | 1222.92             | 124.16              |
| A_68_P23365986 | chr4:141346174-141346218                          | NM_172338:363     | Dnajc16    | INSIDE                 | 0.423                                           | 0.466                            | 1787.12             | 833.14              | 0.197                            | 1389.82             | 274.01              |
| A_68_P21568394 | chr2:119034600-119034644                          | NM_139139:-91     | Dnajc17    | PROMOTER               | 0.230                                           | 0.469                            | 1812.04             | 850.67              | 0.108                            | 1319.29             | 142.16              |
| A_68_P21568396 | chr2:119034800-119034844                          | NM_139139:-291    | Dnajc17    | PROMOTER               | 0.320                                           | 0.621                            | 1302.31             | 808.98              | 0.199                            | 1076.80             | 213.97              |
| A_68_P31619631 | chr18:35862603-35862647                           | NM_029669:174     | Dnajc18    | INSIDE                 | 0.459                                           | 0.616                            | 1100.69             | 677.79              | 0.283                            | 794.98              | 224.68              |
| A_68_P22046077 | chr3:33979970-33980014                            | NM_001026211:256  | Dnajc19    | INSIDE                 | 0.612                                           | 0.558                            | 1122.87             | 626.97              | 0.342                            | 729.58              | 249.15              |
| A_68_P23527832 | chr5:21290509-21290553                            | NM_009584:453     | Dnajc2     | INSIDE                 | 0.437                                           | 0.671                            | 1741.11             | 1167.70             | 0.293                            | 1419.28             | 415.80              |
| A_68_P23527834 | chr5:21290784-21290828                            | NM_009584:177     | Dnajc2     | INSIDE                 | 0.462                                           | 0.621                            | 2982.31             | 1851.15             | 0.287                            | 2410.18             | 690.52              |

| ProbeName      | Target position of probe on CpG island microarray | TargetID           | GeneSymbol | CpG island Description | Ratio of relative methylation (TiO2-NP/Vehicle) | Sham group                       |                     |                     | TiO <sub>2</sub> -H group        |                     |                     |
|----------------|---------------------------------------------------|--------------------|------------|------------------------|-------------------------------------------------|----------------------------------|---------------------|---------------------|----------------------------------|---------------------|---------------------|
|                |                                                   |                    |            |                        |                                                 | Relative methylation (Cy-5/Cy-3) | Cy-3 signal (Input) | Cy-5 signal (MeDIP) | Relative methylation (Cy-5/Cy-3) | Cy-3 signal (Input) | Cy-5 signal (MeDIP) |
| A_68_P30478214 | chr15:98926989-98927033                           | NM_176835:-2904    | Dnaje22    | DIVERGENT_PROMOTER     | 0.378                                           | 0.414                            | 1883.76             | 778.97              | 0.156                            | 1542.55             | 241.04              |
| A_68_P30478221 | chr15:98927716-98927760                           | NM_176835:-2176    | Dnaje22    | DIVERGENT_PROMOTER     | 0.553                                           | 0.383                            | 1523.30             | 583.61              | 0.212                            | 1164.54             | 246.89              |
| A_68_P30478222 | chr15:98927785-98927829                           | NM_176835:-2108    | Dnaje22    | DIVERGENT_PROMOTER     | 0.337                                           | 0.662                            | 1175.81             | 778.42              | 0.223                            | 900.94              | 200.98              |
| A_68_P30478224 | chr15:98928096-98928143                           | NM_176835:-1795    | Dnaje22    | DIVERGENT_PROMOTER     | 0.217                                           | 2.356                            | 920.59              | 2169.23             | 0.510                            | 625.86              | 319.42              |
| A_68_P28198624 | chr12:4082843-4082887                             | NM_153082:291      | Dnaje27    | INSIDE                 | 0.102                                           | 0.597                            | 6184.51             | 3691.19             | 0.061                            | 4158.08             | 253.91              |
| A_68_P31937160 | chr19:7062391-7062440                             | NM_020566:4347     | Dnaje4     | INSIDE                 | 0.283                                           | 0.419                            | 1358.98             | 569.90              | 0.119                            | 987.10              | 117.28              |
| A_68_P23155325 | chr4:101169532-101169576                          | NM_198412:302      | Dnaje6     | INSIDE                 | 0.367                                           | 0.589                            | 1393.48             | 820.60              | 0.216                            | 994.58              | 214.77              |
| A_68_P23155326 | chr4:101169630-101169674                          | NM_198412:400      | Dnaje6     | INSIDE                 | 0.553                                           | 0.660                            | 2483.52             | 1639.61             | 0.365                            | 2019.88             | 737.18              |
| A_68_P23155401 | chr4:101181535-101181581                          | NM_001164584:978   | Dnaje6     | INSIDE                 | 0.158                                           | 0.467                            | 2248.25             | 1049.28             | 0.074                            | 1648.03             | 121.68              |
| A_68_P23155610 | chr4:101223010-101223054                          | NM_001164583:-166  | Dnaje6     | PROMOTER               | 0.616                                           | 0.725                            | 2314.37             | 1677.70             | 0.447                            | 1849.94             | 826.56              |
| A_68_P28069090 | chr11:100480471-100480515                         | NM_019795:990      | Dnaje7     | INSIDE                 | 0.572                                           | 0.689                            | 4194.67             | 2891.82             | 0.394                            | 3144.37             | 1239.33             |
| A_68_P28069093 | chr11:100480802-100480846                         | NM_019795:658      | Dnaje7     | INSIDE                 | 0.411                                           | 0.700                            | 1858.85             | 1301.35             | 0.288                            | 1302.63             | 375.00              |
| A_68_P23312760 | chr4:132091448-132091492                          | NM_172400:-3       | Dnaje8     | DIVERGENT_PROMOTER     | 0.247                                           | 0.429                            | 1410.70             | 604.57              | 0.106                            | 1177.90             | 124.69              |
| A_68_P29446595 | chr14:21207859-21207903                           | NM_134081:252      | Dnaje9     | INSIDE                 | 0.323                                           | 0.410                            | 2167.14             | 887.53              | 0.132                            | 1525.68             | 201.53              |
| A_68_P21078047 | chr2:26207480-26207524                            | NM_001139503:128   | Dnlz       | INSIDE                 | 0.261                                           | 0.427                            | 1395.73             | 596.10              | 0.111                            | 1101.89             | 122.80              |
| A_68_P21114877 | chr2:32208336-32208380                            | NM_010065:466      | Dnm1       | INSIDE                 | 0.182                                           | 0.439                            | 2139.13             | 939.13              | 0.080                            | 1545.52             | 123.35              |
| A_68_P21114882 | chr2:32208948-32208992                            | NM_010065:-146     | Dnm1       | DIVERGENT_PROMOTER     | 0.196                                           | 0.609                            | 1283.73             | 781.66              | 0.119                            | 1015.31             | 121.15              |
| A_68_P26347068 | chr9:21229822-21229866                            | NM_001039520:456   | Dnm2       | INSIDE                 | 0.205                                           | 0.679                            | 3523.93             | 2394.24             | 0.139                            | 2488.52             | 346.23              |
| A_68_P20778062 | chr11:164407645-164407689                         | NM_001038619:495   | Dnm3       | INSIDE                 | 0.098                                           | 0.553                            | 4111.38             | 2271.78             | 0.054                            | 3052.44             | 166.13              |
| A_68_P32129171 | chr19:43954139-43954183                           | NM_028029:32722    | Dnmbp      | INSIDE                 | 0.471                                           | 0.428                            | 3182.83             | 1361.88             | 0.201                            | 2210.38             | 445.27              |
| A_68_P20353308 | chr1:75313628-75313672                            | NM_016878:-58      | Dnpep      | PROMOTER               | 0.193                                           | 0.586                            | 2248.50             | 1318.67             | 0.113                            | 1575.63             | 178.47              |
| A_68_P20353314 | chr1:75314278-75314322                            | NM_001110831:-88   | Dnpep      | PROMOTER               | 0.155                                           | 0.484                            | 2326.43             | 1126.36             | 0.075                            | 1794.33             | 134.37              |
| A_68_P22481535 | chr3:121977658-121977702                          | NM_153806:349      | Dnttip2    | INSIDE                 | 0.627                                           | 0.644                            | 2361.54             | 1521.84             | 0.404                            | 1831.98             | 740.02              |
| A_68_P25502555 | chr7:133991327-133991371                          | NM_010069:282      | Doc2a      | INSIDE                 | 0.542                                           | 0.526                            | 1156.49             | 608.46              | 0.285                            | 965.39              | 275.48              |
| A_68_P27928205 | chr11:75608766-75608811                           | NM_007873:771      | Doc2b      | INSIDE                 | 0.633                                           | 0.689                            | 1849.08             | 1273.82             | 0.436                            | 1455.04             | 634.03              |
| A_68_P27928209 | chr11:75609329-75609373                           | NM_007873:209      | Doc2b      | INSIDE                 | 0.324                                           | 0.409                            | 2502.99             | 1024.49             | 0.132                            | 1958.78             | 259.37              |
| A_68_P20383167 | chr1:80754578-80754622                            | NM_175291:528      | Dock10     | INSIDE                 | 0.275                                           | 0.671                            | 3548.93             | 2381.70             | 0.185                            | 2794.36             | 515.67              |
| A_68_P32315762 | chrX:33428641-33428685                            | NM_001009947:-164  | Dock11     | PROMOTER               | 0.294                                           | 1.708                            | 1636.37             | 2794.21             | 0.503                            | 769.78              | 386.90              |
| A_68_P26807068 | chr9:107095792-107095844                          | NM_153413:38422    | Dock3      | INSIDE                 | 0.467                                           | 5.465                            | 905.88              | 4950.49             | 2.550                            | 696.03              | 1774.54             |
| A_68_P29688234 | chr14:68551046-68551090                           | NM_177780:561      | Dock5      | INSIDE                 | 0.585                                           | 0.514                            | 1339.68             | 688.48              | 0.300                            | 1156.66             | 347.46              |
| A_68_P29688239 | chr14:68551910-68551954                           | NM_177780:-303     | Dock5      | PROMOTER               | 0.609                                           | 0.568                            | 924.51              | 525.56              | 0.346                            | 817.83              | 283.14              |
| A_68_P29957981 | chr14:122196637-122196681                         | NM_134074:298      | Dock9      | INSIDE                 | 0.216                                           | 0.504                            | 2447.64             | 1233.96             | 0.109                            | 1897.75             | 206.32              |
| A_68_P24590977 | chr6:82982750-82982794                            | NM_010070:693      | Dok1       | INSIDE                 | 0.424                                           | 0.543                            | 1563.64             | 848.90              | 0.230                            | 1267.91             | 292.10              |
| A_68_P23597968 | chr5:35399719-35399763                            | NM_172708:8        | Dok7       | INSIDE                 | 0.483                                           | 0.725                            | 1681.12             | 1218.03             | 0.350                            | 1334.37             | 466.66              |
| A_68_P21102297 | chr2:30141550-30141594                            | NM_177648:302      | Dolk       | INSIDE                 | 0.240                                           | 0.584                            | 1091.43             | 637.59              | 0.140                            | 871.46              | 122.24              |
| A_68_P21102299 | chr2:30141747-30141791                            | NM_177648:106      | Dolk       | INSIDE                 | 0.289                                           | 0.581                            | 2654.39             | 1542.59             | 0.168                            | 1932.29             | 324.04              |
| A_68_P21102914 | chr2:30247811-30247855                            | NM_020329:-103     | Dolpp1     | PROMOTER               | 0.613                                           | 0.489                            | 4399.74             | 2149.48             | 0.299                            | 3276.44             | 981.06              |
| A_68_P31156008 | chr17:34974068-34974113                           | NM_001163770:127   | Dom3z      | INSIDE                 | 0.611                                           | 0.503                            | 1152.02             | 579.63              | 0.307                            | 772.23              | 237.39              |
| A_68_P31156012 | chr17:34974444-34974488                           | NM_001163770:503   | Dom3z      | INSIDE                 | 0.487                                           | 0.622                            | 1713.07             | 1065.59             | 0.303                            | 1350.94             | 409.64              |
| A_68_P27281160 | chr10:79594459-79594503                           | NM_001195268:5652  | Dos        | INSIDE                 | 0.639                                           | 0.649                            | 1352.83             | 877.60              | 0.414                            | 1025.43             | 424.80              |
| A_68_P27281212 | chr10:79601441-79601485                           | NM_001195268:-1330 | Dos        | PROMOTER               | 0.066                                           | 1.344                            | 7195.75             | 9673.17             | 0.088                            | 4601.83             | 405.26              |
| A_68_P27281213 | chr10:79601565-79601609                           | NM_001195268:-1454 | Dos        | PROMOTER               | 0.212                                           | 0.720                            | 2801.43             | 2016.59             | 0.152                            | 1810.65             | 275.80              |
| A_68_P26467019 | chr9:44135043-44135087                            | NM_007875:137      | Dpagt1     | INSIDE                 | 0.480                                           | 0.539                            | 1362.77             | 734.99              | 0.259                            | 1126.21             | 291.65              |
| A_68_P26467020 | chr9:44135161-44135205                            | NM_007875:255      | Dpagt1     | INSIDE                 | 0.106                                           | 0.571                            | 2939.59             | 1679.83             | 0.061                            | 1893.04             | 114.95              |

| ProbeName      | Target position of probe on CpG island microarray | TargetID           | GeneSymbol | CpG island Description | Ratio of relative methylation (TiO2-NP/Vehicle) | Sham group                       |                     |                     | TiO <sub>2</sub> -H group        |                     |                     |
|----------------|---------------------------------------------------|--------------------|------------|------------------------|-------------------------------------------------|----------------------------------|---------------------|---------------------|----------------------------------|---------------------|---------------------|
|                |                                                   |                    |            |                        |                                                 | Relative methylation (Cy-5/Cy-3) | Cy-3 signal (Input) | Cy-5 signal (MeDIP) | Relative methylation (Cy-5/Cy-3) | Cy-3 signal (Input) | Cy-5 signal (MeDIP) |
| A_68_P26137126 | chr8:108502836-108502891                          | NM_027960:456      | Dpep3      | INSIDE                 | 0.538                                           | 5.455                            | 266.55              | 1454.01             | 2.936                            | 209.99              | 616.48              |
| A_68_P25026463 | chr7:30089112-30089158                            | NM_013874:111      | Dpf1       | INSIDE                 | 0.192                                           | 0.657                            | 1116.74             | 733.80              | 0.126                            | 926.69              | 116.75              |
| A_68_P25026465 | chr7:30089302-30089346                            | NM_013874:301      | Dpf1       | INSIDE                 | 0.592                                           | 0.682                            | 1670.30             | 1139.36             | 0.404                            | 1269.35             | 512.71              |
| A_68_P28593010 | chr12:84827335-84827379                           | NM_058212:1302     | Dpf3       | INSIDE                 | 0.222                                           | 2.186                            | 3502.32             | 7657.51             | 0.486                            | 2189.41             | 1063.70             |
| A_68_P28593011 | chr12:84827402-84827446                           | NM_058212:1234     | Dpf3       | INSIDE                 | 0.053                                           | 1.542                            | 8286.68             | 12778.79            | 0.081                            | 5432.00             | 442.38              |
| A_68_P29515525 | chr14:32898520-32898564                           | NM_001047433:309   | Dph3       | INSIDE                 | 0.494                                           | 0.402                            | 2249.71             | 905.32              | 0.199                            | 1744.50             | 347.04              |
| A_68_P29515526 | chr14:32898628-32898679                           | NM_001047433:198   | Dph3       | INSIDE                 | 0.434                                           | 0.537                            | 1318.22             | 708.39              | 0.233                            | 1040.87             | 242.91              |
| A_68_P22318234 | chr3:89070459-89070503                            | NM_026767:7        | Dpm3       | INSIDE                 | 0.441                                           | 0.535                            | 2096.22             | 1121.85             | 0.236                            | 1553.58             | 366.66              |
| A_68_P22318235 | chr3:89070608-89070657                            | NM_026767:159      | Dpm3       | INSIDE                 | 0.164                                           | 0.715                            | 1680.15             | 1200.62             | 0.117                            | 1150.04             | 134.93              |
| A_68_P20578314 | chr1:125942313-125942357                          | NM_199021:-198     | Dpp10      | PROMOTER               | 0.220                                           | 0.698                            | 2018.23             | 1408.33             | 0.153                            | 1557.90             | 238.78              |
| A_68_P20578315 | chr1:125942392-125942436                          | NM_199021:-278     | Dpp10      | PROMOTER               | 0.356                                           | 0.463                            | 2751.40             | 1273.57             | 0.165                            | 2109.16             | 347.79              |
| A_68_P31925905 | chr19:4928339-4928383                             | NM_133803:-73      | Dpp3       | PROMOTER               | 0.118                                           | 0.740                            | 2862.19             | 2119.12             | 0.087                            | 2088.62             | 182.69              |
| A_68_P26585431 | chr9:64880028-64880087                            | NM_028906:-207     | Dpp8       | PROMOTER               | 0.293                                           | 0.440                            | 1159.20             | 509.86              | 0.129                            | 948.77              | 122.08              |
| A_68_P26585436 | chr9:64880684-64880728                            | NM_028906:442      | Dpp8       | INSIDE                 | 0.467                                           | 0.699                            | 1563.21             | 1093.18             | 0.326                            | 1063.72             | 347.30              |
| A_68_P26585437 | chr9:64880753-64880797                            | NM_028906:510      | Dpp8       | INSIDE                 | 0.202                                           | 0.730                            | 2641.78             | 1929.15             | 0.148                            | 1885.44             | 278.25              |
| A_68_P25051005 | chr7:36539482-36539526                            | NM_178704:-31      | Dpy1913    | PROMOTER               | 0.556                                           | 0.541                            | 2558.75             | 1384.64             | 0.301                            | 2077.84             | 624.93              |
| A_68_P22729160 | chr4:11248943-11248991                            | NM_001081201:312   | Dpy1914    | INSIDE                 | 0.261                                           | 0.567                            | 916.14              | 519.86              | 0.148                            | 782.07              | 115.62              |
| A_68_P30156152 | chr15:39688848-39688892                           | NM_022722:146      | Dpys       | INSIDE                 | 0.557                                           | 0.581                            | 1804.16             | 1048.81             | 0.324                            | 1202.43             | 389.35              |
| A_68_P30156153 | chr15:39688931-39688978                           | NM_022722:62       | Dpys       | INSIDE                 | 0.146                                           | 0.705                            | 1631.29             | 1149.86             | 0.103                            | 1188.32             | 122.11              |
| A_68_P29681786 | chr14:67486350-67486394                           | NM_009955:1065     | Dpysl2     | INSIDE                 | 0.541                                           | 0.609                            | 4537.04             | 2763.69             | 0.330                            | 3389.91             | 1117.68             |
| A_68_P29681788 | chr14:67486601-67486645                           | NM_009955:815      | Dpysl2     | INSIDE                 | 0.088                                           | 1.990                            | 6312.82             | 12565.59            | 0.175                            | 4012.47             | 701.53              |
| A_68_P29681795 | chr14:67487454-67487502                           | NM_009955:-41      | Dpysl2     | DIVERGENT_PROMOTER     | 0.201                                           | 0.617                            | 1264.24             | 780.41              | 0.124                            | 974.26              | 120.62              |
| A_68_P25575621 | chr7:146271919-146271963                          | NM_011993:41       | Dpysl4     | INSIDE                 | 0.390                                           | 0.561                            | 2409.39             | 1351.91             | 0.219                            | 1732.06             | 378.82              |
| A_68_P23574103 | chr5:31013991-31014035                            | NM_023047:-255     | Dpysl5     | PROMOTER               | 0.414                                           | 0.710                            | 1574.89             | 1118.13             | 0.294                            | 1144.85             | 336.89              |
| A_68_P23970972 | chr5:108697917-108697961                          | NM_026106:23       | Dr1        | INSIDE                 | 0.151                                           | 0.408                            | 3760.10             | 1533.47             | 0.062                            | 2765.36             | 170.10              |
| A_68_P23970975 | chr5:108698202-108698246                          | NM_026106:309      | Dr1        | INSIDE                 | 0.626                                           | 0.692                            | 1479.65             | 1023.38             | 0.433                            | 1373.15             | 594.14              |
| A_68_P29047193 | chr13:54150633-54150677                           | NM_010076:373      | Drd1a      | INSIDE                 | 0.396                                           | 0.545                            | 2490.00             | 1356.97             | 0.216                            | 1903.02             | 411.08              |
| A_68_P29047195 | chr13:54150782-54150826                           | NM_010076:223      | Drd1a      | INSIDE                 | 0.284                                           | 0.507                            | 2712.96             | 1375.12             | 0.144                            | 2034.05             | 293.08              |
| A_68_P29047196 | chr13:54150905-54150949                           | NM_010076:101      | Drd1a      | INSIDE                 | 0.439                                           | 0.594                            | 3805.06             | 2258.45             | 0.261                            | 3019.15             | 786.63              |
| A_68_P25587939 | chr7:148477922-148477966                          | NM_007878:40       | Drd4       | INSIDE                 | 0.364                                           | 0.465                            | 1820.17             | 847.17              | 0.169                            | 1494.82             | 252.94              |
| A_68_P25587959 | chr7:148480560-148480604                          | NM_007878:2678     | Drd4       | INSIDE                 | 0.387                                           | 0.495                            | 1097.57             | 543.76              | 0.192                            | 917.90              | 175.85              |
| A_68_P27551032 | chr11:3166258-3166302                             | NM_007879:109      | Drg1       | INSIDE                 | 0.172                                           | 0.690                            | 3620.02             | 2497.50             | 0.118                            | 2488.61             | 294.72              |
| A_68_P26473573 | chr9:45239483-45239530                            | NM_001081270:1131  | Dscaml1    | INSIDE                 | 0.154                                           | 0.525                            | 1944.60             | 1019.95             | 0.081                            | 1516.86             | 122.16              |
| A_68_P30981933 | chr16:94747960-94748013                           | NM_007834:250      | Dscr3      | INSIDE                 | 0.389                                           | 0.617                            | 1236.96             | 762.84              | 0.240                            | 982.57              | 235.93              |
| A_68_P21774638 | chr2:156832712-156832756                          | NM_025853:77       | Dsn1       | INSIDE                 | 0.359                                           | 0.581                            | 1832.53             | 1065.41             | 0.209                            | 1547.20             | 322.82              |
| A_68_P20137270 | chr1:34234710-34234761                            | NM_133833:166066   | Dst        | INSIDE                 | 0.651                                           | 3.787                            | 212.75              | 805.64              | 2.467                            | 206.01              | 508.22              |
| A_68_P20938879 | chr1:193399292-193399336                          | NM_029766:99       | Dtl        | INSIDE                 | 0.564                                           | 0.410                            | 2542.52             | 1042.82             | 0.231                            | 1970.82             | 455.87              |
| A_68_P24118893 | chr5:136470543-136470598                          | NM_023742:-176     | Dtx2       | PROMOTER               | 0.274                                           | 0.615                            | 983.42              | 604.71              | 0.169                            | 910.04              | 153.37              |
| A_68_P24118896 | chr5:136470915-136470959                          | NM_023742:190      | Dtx2       | INSIDE                 | 0.617                                           | 0.645                            | 2522.89             | 1627.48             | 0.398                            | 2062.38             | 821.34              |
| A_68_P31961132 | chr19:12575516-12575560                           | NM_172442:948      | Dtx4       | INSIDE                 | 0.595                                           | 0.611                            | 1741.39             | 1064.59             | 0.364                            | 1392.13             | 506.25              |
| A_68_P20457519 | chr1:95698419-95698463                            | NM_001105667:71    | Dtymk      | INSIDE                 | 0.304                                           | 0.502                            | 1962.36             | 984.78              | 0.153                            | 1438.06             | 219.73              |
| A_68_P20457521 | chr1:95698612-95698656                            | NM_001105667:-123  | Dtymk      | DIVERGENT_PROMOTER     | 0.371                                           | 0.592                            | 1041.93             | 616.49              | 0.220                            | 836.20              | 183.79              |
| A_68_P21585577 | chr2:122124337-122124381                          | NM_025777:-277     | Duoxa2     | DIVERGENT_PROMOTER     | 0.292                                           | 0.597                            | 901.23              | 537.78              | 0.174                            | 691.95              | 120.45              |
| A_68_P29454308 | chr14:22505922-22505966                           | NM_001013826:27854 | Dupd1      | INSIDE                 | 0.588                                           | 0.575                            | 1335.15             | 767.19              | 0.338                            | 1088.89             | 367.69              |

| ProbeName      | Target position of probe on CpG island microarray | TargetID            | GeneSymbol    | CpG island Description | Ratio of relative methylation (TiO2-NP/Vehicle) | Sham group                       |                     |                     | TiO <sub>2</sub> -H group        |                     |                     |
|----------------|---------------------------------------------------|---------------------|---------------|------------------------|-------------------------------------------------|----------------------------------|---------------------|---------------------|----------------------------------|---------------------|---------------------|
|                |                                                   |                     |               |                        |                                                 | Relative methylation (Cy-5/Cy-3) | Cy-3 signal (Input) | Cy-5 signal (MeDIP) | Relative methylation (Cy-5/Cy-3) | Cy-3 signal (Input) | Cy-5 signal (MeDIP) |
| A_68_P28186829 | chr11:120657297-120657341                         | NM_026824:391       | Dus11         | INSIDE                 | 0.235                                           | 0.603                            | 1173.52             | 707.97              | 0.142                            | 821.66              | 116.66              |
| A_68_P28186830 | chr11:120657372-120657416                         | NM_026824:315       | Dus11         | INSIDE                 | 0.480                                           | 0.659                            | 2813.60             | 1854.72             | 0.316                            | 2222.26             | 702.91              |
| A_68_P28186831 | chr11:120657508-120657552                         | NM_026824:179       | Dus11         | INSIDE                 | 0.640                                           | 0.632                            | 861.08              | 544.18              | 0.404                            | 746.98              | 301.96              |
| A_68_P28186834 | chr11:120657869-120657913                         | NM_026824:-181      | Dus11         | PROMOTER               | 0.423                                           | 0.567                            | 2245.52             | 1272.24             | 0.240                            | 1847.20             | 442.92              |
| A_68_P31258228 | chr17:56904354-56904398                           | NM_144858:203       | Dus31         | INSIDE                 | 0.311                                           | 0.621                            | 1871.83             | 1163.03             | 0.193                            | 1359.56             | 262.92              |
| A_68_P28332514 | chr12:32339519-32339563                           | NM_028002:151       | Dus41         | INSIDE                 | 0.333                                           | 0.443                            | 1334.63             | 591.46              | 0.148                            | 1132.44             | 167.14              |
| A_68_P28332515 | chr12:32339615-32339664                           | NM_028002:52        | Dus41         | INSIDE                 | 0.272                                           | 0.567                            | 1352.00             | 766.46              | 0.154                            | 1092.96             | 168.75              |
| A_68_P31110712 | chr17:26645159-26645203                           | NM_013642:237       | Dusp1         | INSIDE                 | 0.305                                           | 0.685                            | 1711.07             | 1171.73             | 0.209                            | 1326.08             | 277.13              |
| A_68_P24607363 | chr6:85911171-85911215                            | NM_028099:469       | Dusp11        | INSIDE                 | 0.110                                           | 0.562                            | 2551.77             | 1433.52             | 0.062                            | 1891.29             | 116.92              |
| A_68_P24607366 | chr6:85911499-85911543                            | NM_028099:141       | Dusp11        | INSIDE                 | 0.670                                           | 0.621                            | 866.20              | 537.54              | 0.416                            | 726.14              | 302.05              |
| A_68_P27554562 | chr11:3795169-3795213                             | NM_173745:-52       | Dusp18        | DIVERGENT_PROMOTER     | 0.292                                           | 0.588                            | 1725.53             | 1014.44             | 0.172                            | 1300.49             | 223.61              |
| A_68_P21612763 | chr2:127161943-127161987                          | NM_010090:70        | Dusp2         | INSIDE                 | 0.527                                           | 0.415                            | 1381.84             | 573.89              | 0.219                            | 1181.19             | 258.47              |
| A_68_P20834313 | chr1:174563103-174563147                          | NM_026725:-19       | Dusp23        | PROMOTER               | 0.557                                           | 0.482                            | 1550.12             | 747.21              | 0.268                            | 1209.27             | 324.62              |
| A_68_P28076812 | chr11:101846260-101846304                         | NM_028207:-177      | Dusp3         | DIVERGENT_PROMOTER     | 0.660                                           | 0.493                            | 1421.69             | 701.35              | 0.325                            | 1094.23             | 356.06              |
| A_68_P25776075 | chr8:35869882-35869926                            | NM_176933:-759      | Dusp4         | PROMOTER               | 0.176                                           | 0.435                            | 2041.21             | 888.65              | 0.077                            | 1589.93             | 121.80              |
| A_68_P25776076 | chr8:35869953-35869997                            | NM_176933:-689      | Dusp4         | PROMOTER               | 0.654                                           | 0.571                            | 2564.91             | 1464.14             | 0.373                            | 1967.69             | 734.05              |
| A_68_P25776082 | chr8:35870564-35870608                            | NM_176933:-77       | Dusp4         | PROMOTER               | 0.222                                           | 0.683                            | 2338.94             | 1597.35             | 0.151                            | 1536.62             | 232.66              |
| A_68_P25776088 | chr8:35871210-35871254                            | NM_176933:569       | Dusp4         | INSIDE                 | 0.637                                           | 0.602                            | 2469.37             | 1486.92             | 0.384                            | 1867.02             | 716.31              |
| A_68_P25776089 | chr8:35871359-35871403                            | NM_176933:717       | Dusp4         | INSIDE                 | 0.125                                           | 0.701                            | 2310.37             | 1619.92             | 0.088                            | 1707.32             | 150.16              |
| A_68_P25776095 | chr8:35872064-35872108                            | NM_176933:1423      | Dusp4         | INSIDE                 | 0.238                                           | 0.666                            | 1972.23             | 1312.54             | 0.158                            | 1699.59             | 268.82              |
| A_68_P32183070 | chr19:53603197-53603241                           | NM_001085390:-589   | Dusp5         | PROMOTER               | 0.299                                           | 0.465                            | 1305.63             | 607.44              | 0.139                            | 969.44              | 135.02              |
| A_68_P32183081 | chr19:53604393-53604437                           | NM_001085390:607    | Dusp5         | INSIDE                 | 0.075                                           | 1.453                            | 1606.62             | 2334.21             | 0.110                            | 1087.04             | 119.17              |
| A_68_P32183082 | chr19:53604536-53604581                           | NM_001085390:751    | Dusp5         | INSIDE                 | 0.198                                           | 0.691                            | 1291.86             | 892.57              | 0.137                            | 906.88              | 124.01              |
| A_68_P27386030 | chr10:98725559-98725613                           | NM_026268:-278      | Dusp6         | PROMOTER               | 0.152                                           | 0.577                            | 1825.14             | 1052.84             | 0.087                            | 1325.87             | 115.94              |
| A_68_P27386037 | chr10:98726254-98726298                           | NM_026268:412       | Dusp6         | INSIDE                 | 0.523                                           | 0.555                            | 1184.29             | 657.03              | 0.290                            | 1010.52             | 292.97              |
| A_68_P25592946 | chr7:149281230-149281274                          | NM_008748:-63       | Dusp8         | PROMOTER               | 0.590                                           | 0.457                            | 2086.08             | 952.95              | 0.269                            | 1690.04             | 455.17              |
| A_68_P21601160 | chr2:125073182-125073226                          | NM_023595:-46       | Dut           | PROMOTER               | 0.329                                           | 0.733                            | 4470.05             | 3276.61             | 0.241                            | 3542.84             | 855.05              |
| A_68_P21601161 | chr2:125073250-125073294                          | NM_023595:22        | Dut           | INSIDE                 | 0.346                                           | 0.695                            | 2144.94             | 1490.24             | 0.240                            | 1617.56             | 388.64              |
| A_68_P21601162 | chr2:125073336-125073380                          | NM_023595:108       | Dut           | INSIDE                 | 0.116                                           | 0.746                            | 3746.94             | 2796.44             | 0.087                            | 2518.72             | 217.98              |
| A_68_P27898423 | chr11:69814128-69814172                           | NM_007888:23        | Dvl2          | INSIDE                 | 0.265                                           | 0.528                            | 2671.78             | 1409.79             | 0.140                            | 1863.09             | 260.61              |
| A_68_P24213705 | chr6:5955978-5956022                              | NM_001191023:280362 | Dync1i1       | INSIDE                 | 0.360                                           | 0.613                            | 1716.96             | 1051.72             | 0.220                            | 1371.21             | 302.34              |
| A_68_P21318133 | chr2:71050301-71050345                            | NM_001198877:320    | Dync1i2       | INSIDE                 | 0.667                                           | 0.585                            | 905.85              | 529.99              | 0.390                            | 735.70              | 287.24              |
| A_68_P24008924 | chr5:115750457-115750502                          | NM_019682:520       | Dynl11        | INSIDE                 | 0.376                                           | 0.625                            | 2770.59             | 1732.93             | 0.235                            | 2047.53             | 481.21              |
| A_68_P25020569 | chr7:28964516-28964561                            | NM_010092:26        | Dyrk1b        | INSIDE                 | 0.487                                           | 0.644                            | 954.38              | 614.76              | 0.314                            | 868.98              | 272.77              |
| A_68_P27487944 | chr10:118305191-118305235                         | NM_001014390:747    | Dyrk2         | INSIDE                 | 0.544                                           | 0.645                            | 1276.23             | 823.73              | 0.351                            | 1093.33             | 383.90              |
| A_68_P20613762 | chr1:133026314-133026358                          | NM_145508:8475      | Dyrk3         | INSIDE                 | 0.646                                           | 2.760                            | 1035.86             | 2858.97             | 1.782                            | 860.35              | 1532.86             |
| A_68_P20613814 | chr1:133034401-133034445                          | NM_145508:389       | Dyrk3         | INSIDE                 | 0.258                                           | 0.521                            | 1882.84             | 980.99              | 0.135                            | 1552.70             | 208.88              |
| A_68_P26630496 | chr9:72806623-72806667                            | NM_001163725:53     | Dyx1c1        | INSIDE                 | 0.157                                           | 0.536                            | 2529.38             | 1354.55             | 0.084                            | 1858.00             | 156.40              |
| A_68_P29941731 | chr14:119324409-119324453                         | NM_025943:-2041     | Dzip1         | PROMOTER               | 0.550                                           | 0.475                            | 1629.32             | 774.21              | 0.261                            | 1344.65             | 351.27              |
| A_68_P29941732 | chr14:119324506-119324550                         | NM_025943:-2139     | Dzip1         | PROMOTER               | 0.588                                           | 0.519                            | 1763.44             | 915.93              | 0.306                            | 1422.85             | 434.86              |
| A_68_P26765225 | chr9:99530050-99530094                            | NM_028258:59        | Dzip11        | INSIDE                 | 0.667                                           | 0.573                            | 1786.88             | 1024.12             | 0.382                            | 1503.61             | 574.42              |
| A_68_P26135514 | chr8:108231844-108231888                          | NM_198299:202       | E130303B06Rik | INSIDE                 | 0.272                                           | 0.540                            | 1060.09             | 572.21              | 0.147                            | 789.68              | 115.78              |
| A_68_P25051306 | chr7:36587684-36587728                            | NR_033567:96        | E130304I02Rik | INSIDE                 | 0.587                                           | 0.600                            | 1063.82             | 638.82              | 0.353                            | 839.10              | 295.97              |
| A_68_P27921507 | chr11:74433104-74433148                           | NM_001013784:20     | E130309D14Rik | INSIDE                 | 0.385                                           | 0.588                            | 2126.36             | 1249.32             | 0.226                            | 1752.37             | 396.42              |



| ProbeName      | Target position of probe on CpG island microarray | TargetID           | GeneSymbol    | CpG island Description | Ratio of relative methylation (TiO2-NP/Vehicle) | Sham group                       |                     |                     | TiO <sub>2</sub> -H group        |                     |                     |
|----------------|---------------------------------------------------|--------------------|---------------|------------------------|-------------------------------------------------|----------------------------------|---------------------|---------------------|----------------------------------|---------------------|---------------------|
|                |                                                   |                    |               |                        |                                                 | Relative methylation (Cy-5/Cy-3) | Cy-3 signal (Input) | Cy-5 signal (MeDIP) | Relative methylation (Cy-5/Cy-3) | Cy-3 signal (Input) | Cy-5 signal (MeDIP) |
| A_68_P22903293 | chr4:49072217-49072261                            | NM_178756:-95      | E130309F12Rik | PROMOTER               | 0.038                                           | 1.987                            | 5573.01             | 11074.82            | 0.075                            | 3841.46             | 287.20              |
| A_68_P22903297 | chr4:49072600-49072644                            | NM_178756:289      | E130309F12Rik | INSIDE                 | 0.186                                           | 0.542                            | 1581.49             | 857.66              | 0.101                            | 1224.29             | 123.30              |
| A_68_P22903299 | chr4:49072794-49072838                            | NM_178756:483      | E130309F12Rik | INSIDE                 | 0.221                                           | 0.469                            | 1377.16             | 646.06              | 0.104                            | 1128.47             | 116.80              |
| A_68_P21761231 | chr2:154395665-154395709                          | NM_007891:-98      | E2f1          | PROMOTER               | 0.502                                           | 0.342                            | 2061.10             | 704.35              | 0.172                            | 1604.47             | 275.25              |
| A_68_P28914774 | chr13:30075826-30075881                           | NM_010093:2079     | E2f3          | INSIDE                 | 0.191                                           | 0.573                            | 1418.79             | 813.17              | 0.109                            | 1115.78             | 121.98              |
| A_68_P28914783 | chr13:30077028-30077072                           | NM_010093:882      | E2f3          | INSIDE                 | 0.295                                           | 0.653                            | 1692.28             | 1105.35             | 0.193                            | 1342.03             | 258.74              |
| A_68_P28914786 | chr13:30077338-30077382                           | NM_010093:572      | E2f3          | INSIDE                 | 0.344                                           | 0.459                            | 3660.62             | 1681.12             | 0.158                            | 2711.94             | 428.15              |
| A_68_P28914787 | chr13:30077407-30077451                           | NM_010093:504      | E2f3          | INSIDE                 | 0.406                                           | 0.611                            | 2612.84             | 1596.12             | 0.248                            | 2058.37             | 509.93              |
| A_68_P28914791 | chr13:30077924-30077972                           | NM_010093:-16      | E2f3          | PROMOTER               | 0.137                                           | 0.436                            | 2865.18             | 1250.54             | 0.060                            | 1910.86             | 114.42              |
| A_68_P28914792 | chr13:30078001-30078045                           | NM_010093:-90      | E2f3          | PROMOTER               | 0.302                                           | 0.519                            | 1421.78             | 737.76              | 0.157                            | 991.18              | 155.34              |
| A_68_P21957442 | chr3:14578468-14578519                            | NM_007892:-177     | E2f5          | PROMOTER               | 0.266                                           | 0.464                            | 1625.94             | 754.46              | 0.123                            | 1380.23             | 170.26              |
| A_68_P28266976 | chr12:16818150-16818194                           | NM_033270:402      | E2f6          | INSIDE                 | 0.307                                           | 0.572                            | 2104.39             | 1204.19             | 0.176                            | 1746.15             | 306.56              |
| A_68_P27445215 | chr10:110182553-110182597                         | NM_178609:54       | E2f7          | INSIDE                 | 0.512                                           | 0.436                            | 1420.39             | 619.06              | 0.223                            | 1097.74             | 244.80              |
| A_68_P27445216 | chr10:110182710-110182754                         | NM_178609:212      | E2f7          | INSIDE                 | 0.421                                           | 0.462                            | 1902.18             | 877.87              | 0.194                            | 1517.45             | 294.85              |
| A_68_P26659601 | chr9:78290277-78290323                            | NM_173386:654      | E330016A19Rik | INSIDE                 | 0.249                                           | 0.541                            | 1557.65             | 842.83              | 0.135                            | 1237.15             | 166.67              |
| A_68_P26659608 | chr9:78291066-78291110                            | NM_173386:-134     | E330016A19Rik | DIVERGENT_PROMOTER     | 0.256                                           | 0.648                            | 1462.04             | 948.02              | 0.166                            | 1212.77             | 201.24              |
| A_68_P25505455 | chr7:134536637-134536681                          | NM_198011:477      | E430018J23Rik | INSIDE                 | 0.504                                           | 0.521                            | 993.18              | 517.43              | 0.263                            | 860.95              | 226.19              |
| A_68_P31097445 | chr17:24592379-24592423                           | NM_007893:-144     | E4f1          | PROMOTER               | 0.068                                           | 0.746                            | 3145.67             | 2346.73             | 0.051                            | 2272.53             | 115.10              |
| A_68_P29512329 | chr14:32308482-32308526                           | NM_028932:240      | E4f1          | INSIDE                 | 0.646                                           | 0.459                            | 1287.20             | 590.78              | 0.296                            | 1039.79             | 308.20              |
| A_68_P30677440 | chr16:36828175-36828219                           | NM_001113401:149   | E4f2          | INSIDE                 | 0.448                                           | 0.380                            | 1847.89             | 702.56              | 0.170                            | 1422.12             | 242.02              |
| A_68_P30677441 | chr16:36828287-36828331                           | NM_001113401:37    | E4f2          | INSIDE                 | 0.661                                           | 0.640                            | 806.69              | 516.26              | 0.423                            | 706.70              | 299.12              |
| A_68_P27756958 | chr11:44433864-44433908                           | NM_007897:2251     | Eb1f          | INSIDE                 | 0.097                                           | 0.602                            | 2795.45             | 1682.18             | 0.058                            | 2017.61             | 117.38              |
| A_68_P29683688 | chr14:67853251-67853295                           | NM_010095:1144     | Eb1f2         | INSIDE                 | 0.666                                           | 0.603                            | 1322.62             | 797.41              | 0.401                            | 1084.90             | 435.48              |
| A_68_P29683700 | chr14:67854699-67854743                           | NM_010095:2592     | Eb1f2         | INSIDE                 | 0.152                                           | 0.685                            | 3435.06             | 2351.80             | 0.104                            | 2541.11             | 264.34              |
| A_68_P25565211 | chr7:144506565-144506609                          | NM_001113414:-458  | Eb1f3         | PROMOTER               | 0.413                                           | 0.566                            | 1305.03             | 738.81              | 0.234                            | 1040.78             | 243.47              |
| A_68_P25565217 | chr7:144507254-144507298                          | NM_001113414:-1148 | Eb1f3         | PROMOTER               | 0.278                                           | 0.689                            | 1139.32             | 785.53              | 0.192                            | 912.45              | 174.99              |
| A_68_P25565281 | chr7:144514141-144514185                          | NM_001113414:-8034 | Eb1f3         | PROMOTER               | 0.484                                           | 0.643                            | 1717.13             | 1103.61             | 0.311                            | 1446.85             | 449.80              |
| A_68_P21628998 | chr2:130120631-130120675                          | NM_001110513:-1022 | Eb1f4         | PROMOTER               | 0.593                                           | 0.714                            | 2592.44             | 1850.61             | 0.423                            | 1876.95             | 794.32              |
| A_68_P21629316 | chr2:130187590-130187634                          | NM_001110513:65938 | Eb1f4         | INSIDE                 | 0.597                                           | 0.645                            | 2161.58             | 1394.12             | 0.385                            | 1725.52             | 664.14              |
| A_68_P21629321 | chr2:130188203-130188247                          | NM_001110513:66550 | Eb1f4         | INSIDE                 | 0.243                                           | 1.346                            | 2219.49             | 2987.63             | 0.327                            | 1802.35             | 589.92              |
| A_68_P23241426 | chr4:118293372-118293419                          | NM_026932:-8       | Ebna1bp2      | DIVERGENT_PROMOTER     | 0.195                                           | 0.638                            | 1235.31             | 788.08              | 0.124                            | 927.85              | 115.34              |
| A_68_P32242173 | chrX:7769712-7769759                              | NM_007898:903      | Ebp           | INSIDE                 | 0.322                                           | 1.416                            | 1649.64             | 2336.36             | 0.456                            | 820.88              | 374.58              |
| A_68_P32242175 | chrX:7769957-7770003                              | NM_007898:658      | Ebp           | INSIDE                 | 0.311                                           | 0.625                            | 1578.04             | 986.37              | 0.195                            | 626.18              | 121.86              |
| A_68_P29649840 | chr14:61979049-61979093                           | NM_026598:212      | Ebpl          | INSIDE                 | 0.379                                           | 0.627                            | 961.94              | 602.95              | 0.238                            | 806.22              | 191.53              |
| A_68_P23342688 | chr4:137469440-137469484                          | NM_199307:51311    | Ece1          | INSIDE                 | 0.463                                           | 0.548                            | 1427.71             | 781.82              | 0.253                            | 1358.60             | 344.25              |
| A_68_P23342966 | chr4:137514008-137514052                          | NM_199307:95879    | Ece1          | INSIDE                 | 0.630                                           | 3.308                            | 2803.57             | 9274.59             | 2.085                            | 2035.51             | 4243.58             |
| A_68_P30588475 | chr16:20611479-20611531                           | NM_025462:-169     | Ece2          | DIVERGENT_PROMOTER     | 0.078                                           | 0.723                            | 3023.77             | 2184.80             | 0.056                            | 2057.09             | 116.13              |
| A_68_P30588476 | chr16:20611624-20611668                           | NM_025462:-27      | Ece2          | DIVERGENT_PROMOTER     | 0.159                                           | 0.612                            | 1636.15             | 1001.51             | 0.098                            | 1193.98             | 116.53              |
| A_68_P27034329 | chr10:29033110-29033154                           | NM_025855:-173     | Echdc1        | PROMOTER               | 0.243                                           | 0.529                            | 4172.73             | 2208.30             | 0.128                            | 3208.55             | 412.26              |
| A_68_P25582340 | chr7:147302368-147302412                          | NM_053119:-68      | Echs1         | DIVERGENT_PROMOTER     | 0.258                                           | 0.566                            | 3901.65             | 2206.87             | 0.146                            | 3156.08             | 459.78              |
| A_68_P25582341 | chr7:147302455-147302502                          | NM_053119:-156     | Echs1         | DIVERGENT_PROMOTER     | 0.265                                           | 0.562                            | 1003.74             | 563.95              | 0.149                            | 816.93              | 121.63              |
| A_68_P31097235 | chr17:24563756-24563800                           | NM_010023:151      | Eci1          | INSIDE                 | 0.396                                           | 0.527                            | 3129.78             | 1648.81             | 0.209                            | 2436.59             | 508.04              |
| A_68_P28941742 | chr13:35086077-35086121                           | NM_001110331:-85   | Eci2          | PROMOTER               | 0.058                                           | 1.647                            | 2213.86             | 3646.81             | 0.095                            | 1375.37             | 131.01              |
| A_68_P26543334 | chr9:57556210-57556266                            | NM_153799:-137     | Ede3          | PROMOTER               | 0.219                                           | 0.668                            | 1038.76             | 694.08              | 0.146                            | 788.01              | 115.20              |

| ProbeName      | Target position of probe on CpG island microarray | TargetID          | GeneSymbol | CpG island Description | Ratio of relative methylation (TiO2-NP/Vehicle) | Sham group                       |                     |                     | TiO <sub>2</sub> -H group        |                     |                     |
|----------------|---------------------------------------------------|-------------------|------------|------------------------|-------------------------------------------------|----------------------------------|---------------------|---------------------|----------------------------------|---------------------|---------------------|
|                |                                                   |                   |            |                        |                                                 | Relative methylation (Cy-5/Cy-3) | Cy-3 signal (Input) | Cy-5 signal (MeDIP) | Relative methylation (Cy-5/Cy-3) | Cy-3 signal (Input) | Cy-5 signal (MeDIP) |
| A_68_P26543335 | chr9:57556330-57556374                            | NM_153799:-23     | Ecd3       | PROMOTER               | 0.639                                           | 0.622                            | 1894.48             | 1178.32             | 0.398                            | 1420.47             | 564.74              |
| A_68_P26136484 | chr8:108404850-108404894                          | NM_181594:22      | Ecd4       | INSIDE                 | 0.232                                           | 1.482                            | 3712.53             | 5500.23             | 0.344                            | 2542.61             | 874.56              |
| A_68_P24735991 | chr6:108779125-108779169                          | NM_138677:512     | Edem1      | INSIDE                 | 0.534                                           | 0.594                            | 884.04              | 524.77              | 0.317                            | 706.55              | 224.11              |
| A_68_P21767285 | chr2:155555051-155555095                          | NM_145537:139     | Edem2      | INSIDE                 | 0.221                                           | 0.422                            | 1513.77             | 638.13              | 0.093                            | 1302.04             | 121.37              |
| A_68_P29204944 | chr13:88961571-88961615                           | NM_001037987:516  | Edi3       | INSIDE                 | 0.201                                           | 0.629                            | 1172.78             | 738.12              | 0.126                            | 911.57              | 115.06              |
| A_68_P25310575 | chr7:97128573-97128627                            | NM_021876:886     | Eed        | INSIDE                 | 0.230                                           | 0.560                            | 1210.82             | 678.16              | 0.129                            | 895.85              | 115.59              |
| A_68_P25310576 | chr7:97128694-97128740                            | NM_021876:770     | Eed        | INSIDE                 | 0.182                                           | 0.593                            | 1592.32             | 944.22              | 0.108                            | 1107.26             | 119.66              |
| A_68_P26659810 | chr9:78328608-78328655                            | NM_010106:900     | Eef1a1     | INSIDE                 | 0.209                                           | 0.441                            | 1641.13             | 723.39              | 0.092                            | 1262.23             | 116.02              |
| A_68_P26659811 | chr9:78328698-78328742                            | NM_010106:811     | Eef1a1     | INSIDE                 | 0.134                                           | 0.497                            | 2332.21             | 1159.60             | 0.067                            | 1815.37             | 121.26              |
| A_68_P28962018 | chr13:38750527-38750572                           | NM_025380:348     | Eef1e1     | INSIDE                 | 0.473                                           | 0.529                            | 1293.25             | 684.71              | 0.250                            | 1003.15             | 251.03              |
| A_68_P28962021 | chr13:38750788-38750832                           | NM_025380:87      | Eef1e1     | INSIDE                 | 0.291                                           | 0.640                            | 1197.51             | 766.37              | 0.186                            | 937.50              | 174.80              |
| A_68_P25470622 | chr7:127986473-127986517                          | NM_007908:98      | Eef2k      | INSIDE                 | 0.342                                           | 0.620                            | 2300.15             | 1425.40             | 0.212                            | 1815.39             | 385.30              |
| A_68_P25470627 | chr7:127987068-127987112                          | NM_007908:694     | Eef2k      | INSIDE                 | 0.252                                           | 0.659                            | 1620.71             | 1068.33             | 0.166                            | 1275.93             | 211.57              |
| A_68_P20863709 | chr1:180336540-180336584                          | NM_026626:551     | Efcab2     | INSIDE                 | 0.170                                           | 0.458                            | 3807.40             | 1743.50             | 0.078                            | 2925.00             | 227.43              |
| A_68_P25588981 | chr7:148648103-148648147                          | NM_001025103:1132 | Efcab4a    | INSIDE                 | 0.401                                           | 0.489                            | 1279.57             | 625.46              | 0.196                            | 951.70              | 186.53              |
| A_68_P23146396 | chr4:99496193-99496248                            | NM_145549:30      | Efcab7     | INSIDE                 | 0.226                                           | 0.593                            | 1339.13             | 793.48              | 0.134                            | 923.42              | 123.66              |
| A_68_P20416756 | chr1:89160739-89160787                            | NM_028889:-176    | Efhdl1     | PROMOTER               | 0.305                                           | 0.479                            | 1156.38             | 553.94              | 0.146                            | 810.92              | 118.64              |
| A_68_P22318336 | chr3:89084785-89084834                            | NM_010107:-1242   | Efna1      | PROMOTER               | 0.160                                           | 0.626                            | 1735.52             | 1086.78             | 0.100                            | 1236.35             | 123.95              |
| A_68_P27281569 | chr10:79649352-79649396                           | NM_007909:7148    | Efna2      | INSIDE                 | 0.407                                           | 1.541                            | 1256.56             | 1936.53             | 0.627                            | 969.03              | 607.79              |
| A_68_P27281570 | chr10:79649434-79649479                           | NM_007909:7230    | Efna2      | INSIDE                 | 0.588                                           | 2.645                            | 5708.01             | 15096.17            | 1.556                            | 3752.70             | 5837.50             |
| A_68_P22318526 | chr3:89120527-89120571                            | NM_010108:6253    | Efna3      | INSIDE                 | 0.397                                           | 0.639                            | 1485.97             | 948.79              | 0.254                            | 1110.36             | 281.80              |
| A_68_P22318527 | chr3:89120595-89120646                            | NM_010108:6181    | Efna3      | INSIDE                 | 0.197                                           | 0.642                            | 1459.59             | 937.30              | 0.127                            | 990.46              | 125.31              |
| A_68_P22318558 | chr3:89124366-89124410                            | NM_010108:2413    | Efna3      | INSIDE                 | 0.333                                           | 1.492                            | 4248.51             | 6336.96             | 0.496                            | 3141.81             | 1559.10             |
| A_68_P22318559 | chr3:89124527-89124571                            | NM_010108:2253    | Efna3      | INSIDE                 | 0.209                                           | 0.569                            | 1246.80             | 709.24              | 0.119                            | 1012.21             | 120.11              |
| A_68_P22318571 | chr3:89125906-89125950                            | NM_010108:873     | Efna3      | INSIDE                 | 0.263                                           | 1.756                            | 11254.09            | 19767.21            | 0.461                            | 6990.29             | 3223.29             |
| A_68_P31286837 | chr17:63229431-63229475                           | NM_010109:1214    | Efna5      | INSIDE                 | 0.444                                           | 0.545                            | 1056.23             | 575.46              | 0.242                            | 786.12              | 190.15              |
| A_68_P31286845 | chr17:63230423-63230467                           | NM_010109:222     | Efna5      | INSIDE                 | 0.358                                           | 0.701                            | 2262.00             | 1584.83             | 0.251                            | 1591.00             | 399.54              |
| A_68_P31286851 | chr17:63231331-63231377                           | NM_010109:-688    | Efna5      | PROMOTER               | 0.173                                           | 0.682                            | 1466.36             | 1000.36             | 0.118                            | 1025.23             | 121.29              |
| A_68_P32553698 | chrX:96331493-96331537                            | NM_010110:46      | Efnb1      | INSIDE                 | 0.143                                           | 1.438                            | 1503.49             | 2161.96             | 0.206                            | 785.68              | 161.92              |
| A_68_P32553707 | chrX:96332536-96332580                            | NM_010110:1090    | Efnb1      | INSIDE                 | 0.055                                           | 2.793                            | 1851.05             | 5170.11             | 0.155                            | 777.30              | 120.18              |
| A_68_P25637619 | chr8:8660957-8661001                              | NM_010111:-205    | Efnb2      | PROMOTER               | 0.342                                           | 0.556                            | 1755.35             | 976.85              | 0.190                            | 1389.17             | 264.38              |
| A_68_P25637620 | chr8:8661042-8661086                              | NM_010111:-291    | Efnb2      | PROMOTER               | 0.384                                           | 0.429                            | 1357.65             | 581.82              | 0.165                            | 1001.31             | 164.86              |
| A_68_P29615091 | chr14:55545244-55545288                           | NM_010112:359     | Efs        | INSIDE                 | 0.227                                           | 0.697                            | 2996.73             | 2088.62             | 0.158                            | 2246.55             | 354.71              |
| A_68_P29615094 | chr14:55545462-55545506                           | NM_010112:141     | Efs        | INSIDE                 | 0.296                                           | 0.619                            | 1572.86             | 974.21              | 0.183                            | 1139.18             | 208.54              |
| A_68_P27612234 | chr11:16652279-16652323                           | NM_007912:95      | Egfr       | INSIDE                 | 0.351                                           | 0.580                            | 936.29              | 543.40              | 0.204                            | 700.44              | 142.85              |
| A_68_P26248660 | chr8:127472125-127472169                          | NM_053207:1008    | Egln1      | INSIDE                 | 0.405                                           | 0.419                            | 1430.66             | 598.91              | 0.170                            | 1160.96             | 197.05              |
| A_68_P25015864 | chr7:27951357-27951401                            | NM_053208:443     | Egln2      | INSIDE                 | 0.537                                           | 0.503                            | 3145.81             | 1582.63             | 0.270                            | 2313.69             | 625.17              |
| A_68_P25015867 | chr7:27951865-27951909                            | NM_053208:-65     | Egln2      | PROMOTER               | 0.373                                           | 0.528                            | 1116.01             | 589.21              | 0.197                            | 856.52              | 168.89              |
| A_68_P31615128 | chr18:35020826-35020870                           | NM_007913:-12     | Egr1       | PROMOTER               | 0.157                                           | 0.471                            | 2150.96             | 1012.61             | 0.074                            | 1559.68             | 115.61              |
| A_68_P27212431 | chr10:66999287-66999333                           | NM_010118:-1306   | Egr2       | PROMOTER               | 0.167                                           | 0.567                            | 1741.96             | 987.37              | 0.095                            | 1249.12             | 118.39              |
| A_68_P27212434 | chr10:66999516-66999563                           | NM_010118:-1077   | Egr2       | PROMOTER               | 0.198                                           | 2.177                            | 3937.19             | 8572.79             | 0.431                            | 2827.98             | 1219.76             |
| A_68_P29698995 | chr14:70474363-70474407                           | NM_018781:-2867   | Egr3       | PROMOTER               | 0.139                                           | 0.548                            | 1932.06             | 1058.90             | 0.076                            | 1522.60             | 115.60              |
| A_68_P29699000 | chr14:70475029-70475073                           | NM_018781:-2201   | Egr3       | PROMOTER               | 0.375                                           | 0.542                            | 1194.60             | 647.38              | 0.203                            | 954.61              | 193.80              |
| A_68_P29699002 | chr14:70475220-70475264                           | NM_018781:-2009   | Egr3       | PROMOTER               | 0.233                                           | 0.626                            | 1024.73             | 641.53              | 0.146                            | 798.27              | 116.46              |

| ProbeName      | Target position of probe on CpG island microarray | TargetID         | GeneSymbol | CpG island Description | Ratio of relative methylation (TiO2-NP/Vehicle) | Sham group                       |                     |                     | TiO <sub>2</sub> -H group        |                     |                     |
|----------------|---------------------------------------------------|------------------|------------|------------------------|-------------------------------------------------|----------------------------------|---------------------|---------------------|----------------------------------|---------------------|---------------------|
|                |                                                   |                  |            |                        |                                                 | Relative methylation (Cy-5/Cy-3) | Cy-3 signal (Input) | Cy-5 signal (MeDIP) | Relative methylation (Cy-5/Cy-3) | Cy-3 signal (Input) | Cy-5 signal (MeDIP) |
| A_68_P29699020 | chr14:70477756-70477800                           | NM_018781:527    | Egr3       | INSIDE                 | 0.368                                           | 0.632                            | 2005.00             | 1266.39             | 0.232                            | 1471.41             | 341.64              |
| A_68_P29699021 | chr14:70477881-70477925                           | NM_018781:651    | Egr3       | INSIDE                 | 0.200                                           | 0.651                            | 2839.06             | 1848.43             | 0.130                            | 2319.54             | 301.92              |
| A_68_P29699028 | chr14:70478715-70478759                           | NM_018781:1485   | Egr3       | INSIDE                 | 0.441                                           | 0.563                            | 1355.65             | 763.34              | 0.248                            | 993.42              | 246.71              |
| A_68_P29699029 | chr14:70478786-70478830                           | NM_018781:1557   | Egr3       | INSIDE                 | 0.307                                           | 0.538                            | 1017.69             | 547.72              | 0.165                            | 699.15              | 115.53              |
| A_68_P29699033 | chr14:70479382-70479426                           | NM_018781:2153   | Egr3       | INSIDE                 | 0.163                                           | 0.460                            | 2042.28             | 938.77              | 0.075                            | 1575.72             | 118.15              |
| A_68_P31930375 | chr19:5716486-5716534                             | NM_00114595:9807 | Ehbp111    | INSIDE                 | 0.169                                           | 0.504                            | 1845.37             | 929.82              | 0.085                            | 1357.42             | 115.87              |
| A_68_P31933631 | chr19:6276479-6276524                             | NM_010119:-394   | Ehd1       | PROMOTER               | 0.221                                           | 0.476                            | 1612.19             | 767.36              | 0.105                            | 1143.85             | 120.40              |
| A_68_P31933638 | chr19:6277193-6277237                             | NM_010119:319    | Ehd1       | INSIDE                 | 0.257                                           | 0.361                            | 4704.13             | 1698.35             | 0.093                            | 3546.43             | 328.91              |
| A_68_P21573664 | chr2:119979962-119980006                          | NM_133838:327    | Ehd4       | INSIDE                 | 0.204                                           | 0.507                            | 1361.52             | 690.49              | 0.104                            | 1120.93             | 116.07              |
| A_68_P21573667 | chr2:119980437-119980486                          | NM_133838:-150   | Ehd4       | PROMOTER               | 0.212                                           | 0.650                            | 1219.61             | 792.90              | 0.138                            | 907.55              | 125.04              |
| A_68_P21573668 | chr2:119980528-119980572                          | NM_133838:-239   | Ehd4       | PROMOTER               | 0.160                                           | 0.456                            | 2041.22             | 930.87              | 0.073                            | 1609.40             | 117.49              |
| A_68_P26426830 | chr9:36604533-36604577                            | NM_007915:99     | Ei24       | INSIDE                 | 0.245                                           | 0.560                            | 1102.62             | 617.41              | 0.137                            | 960.57              | 131.84              |
| A_68_P28067416 | chr11:100180895-100180948                         | NM_011508:-388   | Eif1       | PROMOTER               | 0.176                                           | 0.619                            | 1706.07             | 1056.87             | 0.109                            | 1144.17             | 125.07              |
| A_68_P28067421 | chr11:100181597-100181641                         | NM_011508:309    | Eif1       | INSIDE                 | 0.505                                           | 0.388                            | 2398.67             | 929.51              | 0.196                            | 1907.61             | 373.50              |
| A_68_P28067422 | chr11:100181743-100181787                         | NM_011508:455    | Eif1       | INSIDE                 | 0.261                                           | 0.526                            | 1833.83             | 964.85              | 0.137                            | 1286.42             | 176.57              |
| A_68_P31928290 | chr19:5367444-5367500                             | NM_027236:660    | Eif1ad     | INSIDE                 | 0.579                                           | 0.459                            | 1233.97             | 566.61              | 0.266                            | 1159.37             | 308.41              |
| A_68_P26878190 | chr9:120401831-120401875                          | NM_026892:129    | Eif1b      | INSIDE                 | 0.590                                           | 0.643                            | 2200.97             | 1414.61             | 0.379                            | 1671.60             | 634.25              |
| A_68_P26878194 | chr9:120402272-120402316                          | NM_026892:571    | Eif1b      | INSIDE                 | 0.340                                           | 0.643                            | 1232.01             | 792.49              | 0.219                            | 908.79              | 198.62              |
| A_68_P24158346 | chr5:144578888-144578932                          | NM_013557:250    | Eif2ak1    | INSIDE                 | 0.380                                           | 0.493                            | 3030.88             | 1494.45             | 0.187                            | 2286.94             | 428.01              |
| A_68_P28602892 | chr12:86560540-86560584                           | NM_145445:100    | Eif2b2     | INSIDE                 | 0.203                                           | 0.534                            | 1407.50             | 751.37              | 0.108                            | 1091.84             | 118.30              |
| A_68_P28602893 | chr12:86560681-86560733                           | NM_145445:244    | Eif2b2     | INSIDE                 | 0.163                                           | 0.438                            | 2476.38             | 1084.81             | 0.071                            | 1621.67             | 115.92              |
| A_68_P28602894 | chr12:86560864-86560908                           | NM_145445:424    | Eif2b2     | INSIDE                 | 0.178                                           | 0.661                            | 1526.31             | 1008.15             | 0.118                            | 1129.99             | 132.96              |
| A_68_P23232034 | chr4:116691797-116691854                          | NM_175135:-187   | Eif2b3     | PROMOTER               | 0.226                                           | 0.465                            | 1277.46             | 593.48              | 0.105                            | 1150.60             | 120.98              |
| A_68_P23576981 | chr5:31495306-31495353                            | NM_001127355:183 | Eif2b4     | INSIDE                 | 0.076                                           | 0.575                            | 3657.33             | 2104.26             | 0.044                            | 2694.09             | 118.19              |
| A_68_P30328924 | chr15:73014625-73014669                           | NM_153178:731    | Eif2c2     | INSIDE                 | 0.307                                           | 0.542                            | 1536.65             | 832.16              | 0.166                            | 1283.33             | 213.28              |
| A_68_P30328931 | chr15:73015939-73015989                           | NM_153178:-587   | Eif2c2     | PROMOTER               | 0.152                                           | 0.665                            | 1581.51             | 1051.35             | 0.101                            | 1152.23             | 116.70              |
| A_68_P28566344 | chr12:79963184-79963228                           | NM_026114:148    | Eif2s1     | INSIDE                 | 0.409                                           | 0.487                            | 1532.72             | 745.90              | 0.199                            | 1213.84             | 241.38              |
| A_68_P21762927 | chr2:154718076-154718120                          | NM_026030:544    | Eif2s2     | INSIDE                 | 0.422                                           | 0.494                            | 1295.85             | 640.47              | 0.209                            | 1049.91             | 219.18              |
| A_68_P21762928 | chr2:154718164-154718208                          | NM_026030:456    | Eif2s2     | INSIDE                 | 0.482                                           | 0.521                            | 3504.72             | 1826.80             | 0.251                            | 2641.39             | 663.62              |
| A_68_P21762930 | chr2:154718365-154718409                          | NM_026030:256    | Eif2s2     | INSIDE                 | 0.514                                           | 0.404                            | 1515.20             | 611.42              | 0.208                            | 1128.13             | 234.09              |
| A_68_P21762934 | chr2:154718701-154718745                          | NM_026030:-80    | Eif2s2     | PROMOTER               | 0.634                                           | 0.632                            | 983.75              | 622.14              | 0.401                            | 747.45              | 299.69              |
| A_68_P32227250 | chr19:60866724-60866768                           | NM_010123:-150   | Eif3a      | PROMOTER               | 0.154                                           | 0.701                            | 1395.48             | 977.90              | 0.108                            | 1126.20             | 121.40              |
| A_68_P24141307 | chr5:140894611-140894655                          | NM_133916:-626   | Eif3b      | PROMOTER               | 0.611                                           | 0.418                            | 1644.66             | 687.41              | 0.256                            | 1499.27             | 383.16              |
| A_68_P24141318 | chr5:140895750-140895794                          | NM_133916:514    | Eif3b      | INSIDE                 | 0.308                                           | 0.711                            | 1372.71             | 975.79              | 0.219                            | 1101.52             | 241.33              |
| A_68_P25501141 | chr7:133709739-133709783                          | NM_146200:120    | Eif3c      | INSIDE                 | 0.449                                           | 0.584                            | 3014.82             | 1759.84             | 0.262                            | 2498.26             | 654.79              |
| A_68_P25501142 | chr7:133709848-133709892                          | NM_146200:10     | Eif3c      | INSIDE                 | 0.231                                           | 0.669                            | 1853.08             | 1239.80             | 0.155                            | 1422.48             | 219.90              |
| A_68_P25501143 | chr7:133709945-133709993                          | NM_146200:-88    | Eif3c      | PROMOTER               | 0.408                                           | 0.609                            | 935.98              | 570.37              | 0.248                            | 786.54              | 195.38              |
| A_68_P30356903 | chr15:77800770-77800814                           | NM_018749:462    | Eif3d      | INSIDE                 | 0.214                                           | 0.401                            | 1814.73             | 726.86              | 0.086                            | 1402.05             | 120.45              |
| A_68_P30356904 | chr15:77800920-77800964                           | NM_018749:312    | Eif3d      | INSIDE                 | 0.169                                           | 0.429                            | 2066.94             | 886.70              | 0.073                            | 1592.48             | 115.63              |
| A_68_P30356906 | chr15:77801158-77801202                           | NM_018749:74     | Eif3d      | INSIDE                 | 0.118                                           | 0.574                            | 2446.97             | 1403.66             | 0.068                            | 1774.70             | 120.56              |
| A_68_P30356910 | chr15:77801656-77801700                           | NM_018749:-424   | Eif3d      | PROMOTER               | 0.262                                           | 0.709                            | 1621.73             | 1149.04             | 0.186                            | 1294.92             | 240.82              |
| A_68_P26344425 | chr9:20702979-20703023                            | NM_016876:34     | Eif3g      | INSIDE                 | 0.325                                           | 0.497                            | 2891.30             | 1437.01             | 0.162                            | 2273.68             | 367.67              |
| A_68_P30213285 | chr15:51696567-51696616                           | NM_080635:416    | Eif3h      | INSIDE                 | 0.105                                           | 1.622                            | 1322.73             | 2145.54             | 0.170                            | 941.63              | 160.24              |
| A_68_P21584024 | chr2:121854878-121854922                          | NM_144545:542    | Eif3j      | INSIDE                 | 0.228                                           | 0.531                            | 1199.32             | 636.98              | 0.121                            | 976.93              | 118.55              |

| ProbeName      | Target position of probe on CpG island microarray | TargetID         | GeneSymbol | CpG island Description | Ratio of relative methylation (TiO2-NP/Vehicle) | Sham group                       |                     |                     | TiO <sub>2</sub> -H group        |                     |                     |
|----------------|---------------------------------------------------|------------------|------------|------------------------|-------------------------------------------------|----------------------------------|---------------------|---------------------|----------------------------------|---------------------|---------------------|
|                |                                                   |                  |            |                        |                                                 | Relative methylation (Cy-5/Cy-3) | Cy-3 signal (Input) | Cy-5 signal (MeDIP) | Relative methylation (Cy-5/Cy-3) | Cy-3 signal (Input) | Cy-5 signal (MeDIP) |
| A_68_P27896442 | chr11:69485330-69485374                           | NM_001159375:573 | Eif4a1     | INSIDE                 | 0.255                                           | 0.633                            | 1529.93             | 969.07              | 0.161                            | 1242.39             | 200.41              |
| A_68_P20416436 | chr1:89110508-89110552                            | NM_001039169:17  | Eif4e2     | INSIDE                 | 0.306                                           | 0.609                            | 1179.37             | 718.03              | 0.187                            | 960.07              | 179.11              |
| A_68_P24687559 | chr6:99616974-99617018                            | NM_025829:-231   | Eif4e3     | PROMOTER               | 0.393                                           | 0.659                            | 1635.27             | 1077.16             | 0.259                            | 1160.44             | 300.29              |
| A_68_P25737431 | chr8:28371155-28371199                            | NM_007918:378    | Eif4ebp1   | INSIDE                 | 0.103                                           | 0.601                            | 2545.81             | 1529.03             | 0.062                            | 1846.76             | 114.75              |
| A_68_P27180612 | chr10:60915666-60915710                           | NM_010124:-271   | Eif4ebp2   | PROMOTER               | 0.300                                           | 2.127                            | 3037.71             | 6460.83             | 0.637                            | 2245.62             | 1431.38             |
| A_68_P25416985 | chr7:118225708-118225752                          | NM_001040131:814 | Eif4g2     | INSIDE                 | 0.351                                           | 0.601                            | 1018.69             | 611.78              | 0.211                            | 908.92              | 191.53              |
| A_68_P28744646 | chr12:112776044-112776088                         | NM_173363:-245   | Eif5       | PROMOTER               | 0.269                                           | 0.663                            | 2828.18             | 1875.34             | 0.178                            | 2241.52             | 399.96              |
| A_68_P27897957 | chr11:69734148-69734192                           | NM_001166590:-38 | Eif5a      | PROMOTER               | 0.556                                           | 0.655                            | 936.87              | 613.40              | 0.364                            | 849.72              | 309.06              |
| A_68_P27897961 | chr11:69734599-69734643                           | NM_001166596:-33 | Eif5a      | PROMOTER               | 0.406                                           | 0.463                            | 1940.76             | 898.54              | 0.188                            | 1546.60             | 290.79              |
| A_68_P20157022 | chr1:38055055-38055099                            | NM_198303:222    | Eif5b      | INSIDE                 | 0.628                                           | 0.707                            | 1327.07             | 938.31              | 0.444                            | 1144.07             | 508.22              |
| A_68_P21767847 | chr2:155651782-155651827                          | NM_010579:857    | Eif6       | INSIDE                 | 0.130                                           | 1.558                            | 884.45              | 1377.62             | 0.202                            | 573.61              | 115.78              |
| A_68_P21767850 | chr2:155652193-155652237                          | NM_010579:447    | Eif6       | INSIDE                 | 0.347                                           | 0.554                            | 4497.99             | 2492.59             | 0.192                            | 3414.99             | 656.39              |
| A_68_P21767852 | chr2:155652392-155652439                          | NM_010579:246    | Eif6       | INSIDE                 | 0.180                                           | 0.578                            | 2736.92             | 1581.08             | 0.104                            | 1938.08             | 201.22              |
| A_68_P23103758 | chr4:91041293-91041337                            | NM_010486:-2568  | Elav12     | PROMOTER               | 0.177                                           | 0.728                            | 2369.28             | 1724.79             | 0.129                            | 1762.39             | 227.00              |
| A_68_P23103759 | chr4:91041388-91041432                            | NM_010486:-2664  | Elav12     | PROMOTER               | 0.575                                           | 0.693                            | 2443.92             | 1693.04             | 0.398                            | 2132.77             | 848.93              |
| A_68_P23103963 | chr4:91067208-91067252                            | NM_207685:-555   | Elav12     | PROMOTER               | 0.080                                           | 0.639                            | 3163.57             | 2021.53             | 0.051                            | 2263.49             | 115.40              |
| A_68_P26350219 | chr9:21855638-21855682                            | NM_010487:807    | Elav13     | INSIDE                 | 0.297                                           | 0.704                            | 4462.12             | 3140.26             | 0.209                            | 3223.27             | 674.40              |
| A_68_P22128828 | chr3:51079948-51080002                            | NM_023502:49935  | Eif2       | INSIDE                 | 0.212                                           | 0.543                            | 1349.36             | 732.60              | 0.115                            | 1059.90             | 121.80              |
| A_68_P22128829 | chr3:51080053-51080101                            | NM_023502:49833  | Eif2       | INSIDE                 | 0.198                                           | 0.430                            | 1871.37             | 804.06              | 0.085                            | 1416.45             | 120.23              |
| A_68_P22128830 | chr3:51080151-51080198                            | NM_023502:49735  | Eif2       | INSIDE                 | 0.222                                           | 0.707                            | 1359.74             | 961.45              | 0.157                            | 893.64              | 140.22              |
| A_68_P22128837 | chr3:51081149-51081193                            | NM_023502:48739  | Eif2       | INSIDE                 | 0.142                                           | 0.545                            | 2634.44             | 1434.62             | 0.078                            | 2014.56             | 156.16              |
| A_68_P32364768 | chrX:45807315-45807359                            | NM_019680:8973   | Eif4       | INSIDE                 | 0.155                                           | 1.674                            | 3291.28             | 5510.12             | 0.260                            | 1215.78             | 315.94              |
| A_68_P24138249 | chr5:140383826-140383870                          | NM_175522:-48    | Eifn1      | PROMOTER               | 0.020                                           | 1.782                            | 5297.62             | 9442.53             | 0.036                            | 3315.72             | 118.02              |
| A_68_P24138250 | chr5:140383933-140383977                          | NM_175522:58     | Eifn1      | INSIDE                 | 0.042                                           | 1.584                            | 2700.46             | 4277.88             | 0.066                            | 1760.59             | 116.87              |
| A_68_P24138252 | chr5:140384071-140384115                          | NM_175522:196    | Eifn1      | INSIDE                 | 0.338                                           | 0.583                            | 1399.90             | 815.47              | 0.197                            | 1168.09             | 230.30              |
| A_68_P24138259 | chr5:140384979-140385023                          | NM_175522:1104   | Eifn1      | INSIDE                 | 0.529                                           | 0.635                            | 1341.42             | 851.77              | 0.336                            | 1017.60             | 341.66              |
| A_68_P24138260 | chr5:140385057-140385101                          | NM_175522:1182   | Eifn1      | INSIDE                 | 0.138                                           | 0.567                            | 1989.09             | 1128.13             | 0.078                            | 1511.23             | 117.91              |
| A_68_P24138293 | chr5:140389088-140389132                          | NM_175522:5214   | Eifn1      | INSIDE                 | 0.145                                           | 0.524                            | 2335.48             | 1223.21             | 0.076                            | 1655.78             | 126.15              |
| A_68_P30361561 | chr15:78503090-78503140                           | NM_183141:45429  | Eifn2      | INSIDE                 | 0.306                                           | 1.438                            | 1384.09             | 1990.61             | 0.441                            | 1048.42             | 461.94              |
| A_68_P30361874 | chr15:78543529-78543573                           | NM_183141:4993   | Eifn2      | INSIDE                 | 0.659                                           | 0.436                            | 2396.17             | 1045.86             | 0.287                            | 1940.54             | 557.78              |
| A_68_P27352991 | chr10:92773177-92773221                           | NM_013508:706    | Elk3       | INSIDE                 | 0.239                                           | 0.659                            | 956.91              | 630.54              | 0.157                            | 775.26              | 121.84              |
| A_68_P20618861 | chr1:133904468-133904512                          | NM_007923:309    | Elk4       | INSIDE                 | 0.602                                           | 0.632                            | 2302.05             | 1453.89             | 0.380                            | 1819.24             | 691.20              |
| A_68_P20618864 | chr1:133904839-133904887                          | NM_007923:681    | Elk4       | INSIDE                 | 0.257                                           | 0.515                            | 1770.28             | 911.89              | 0.132                            | 1351.53             | 179.07              |
| A_68_P25952515 | chr8:73062683-73062729                            | NM_007924:-867   | Eil1       | PROMOTER               | 0.274                                           | 1.486                            | 2985.15             | 4436.35             | 0.407                            | 1808.70             | 736.48              |
| A_68_P25952518 | chr8:73062911-73062958                            | NM_007924:-639   | Eil1       | PROMOTER               | 0.230                                           | 0.477                            | 1401.11             | 667.69              | 0.109                            | 1136.48             | 124.39              |
| A_68_P25952523 | chr8:73063414-73063459                            | NM_007924:-137   | Eil1       | PROMOTER               | 0.339                                           | 0.622                            | 1705.78             | 1060.79             | 0.211                            | 1280.19             | 269.65              |
| A_68_P25952525 | chr8:73063833-73063877                            | NM_007924:281    | Eil1       | INSIDE                 | 0.559                                           | 0.535                            | 1118.59             | 598.08              | 0.299                            | 918.35              | 274.41              |
| A_68_P29150850 | chr13:75845171-75845215                           | NM_138953:261    | Eil2       | INSIDE                 | 0.611                                           | 0.560                            | 2148.41             | 1202.57             | 0.342                            | 1824.14             | 623.46              |
| A_68_P29150854 | chr13:75845732-75845776                           | NM_138953:823    | Eil2       | INSIDE                 | 0.206                                           | 0.632                            | 2950.51             | 1864.78             | 0.130                            | 2282.07             | 297.40              |
| A_68_P29150855 | chr13:75845818-75845862                           | NM_138953:909    | Eil2       | INSIDE                 | 0.284                                           | 0.551                            | 3812.96             | 2100.90             | 0.157                            | 2775.00             | 434.36              |
| A_68_P28865537 | chr13:20182539-20182583                           | NM_080288:185    | Elmo1      | INSIDE                 | 0.160                                           | 0.428                            | 3567.37             | 1526.30             | 0.068                            | 2815.55             | 192.78              |
| A_68_P28865540 | chr13:20183015-20183059                           | NM_080288:661    | Elmo1      | INSIDE                 | 0.323                                           | 0.557                            | 1580.09             | 880.66              | 0.180                            | 1222.61             | 220.38              |
| A_68_P28865541 | chr13:20183122-20183166                           | NM_080288:769    | Elmo1      | INSIDE                 | 0.401                                           | 0.362                            | 2120.48             | 767.66              | 0.145                            | 1712.97             | 248.82              |
| A_68_P21823221 | chr2:165151623-165151667                          | NM_207705:-9251  | Elmo2      | PROMOTER               | 0.583                                           | 0.534                            | 1692.06             | 904.29              | 0.311                            | 1298.13             | 404.31              |

| ProbeName      | Target position of probe on CpG island microarray | TargetID           | GeneSymbol | CpG island Description | Ratio of relative methylation (TiO2-NP/Vehicle) | Sham group                       |                     |                     | TiO <sub>2</sub> -H group        |                     |                     |
|----------------|---------------------------------------------------|--------------------|------------|------------------------|-------------------------------------------------|----------------------------------|---------------------|---------------------|----------------------------------|---------------------|---------------------|
|                |                                                   |                    |            |                        |                                                 | Relative methylation (Cy-5/Cy-3) | Cy-3 signal (Input) | Cy-5 signal (MeDIP) | Relative methylation (Cy-5/Cy-3) | Cy-3 signal (Input) | Cy-5 signal (MeDIP) |
| A_68_P21823222 | chr2:165151741-165151785                          | NM_207705:9369     | Elmo2      | PROMOTER               | 0.561                                           | 0.563                            | 2297.23             | 1293.88             | 0.316                            | 1698.80             | 536.64              |
| A_68_P26685697 | chr9:83699258-83699303                            | NM_001145974:569   | Elov4      | INSIDE                 | 0.200                                           | 1.549                            | 758.58              | 1174.68             | 0.310                            | 595.79              | 184.95              |
| A_68_P26657025 | chr9:77765481-77765525                            | NM_134255:331      | Elov5      | INSIDE                 | 0.575                                           | 0.572                            | 998.33              | 571.27              | 0.329                            | 842.64              | 277.24              |
| A_68_P26657026 | chr9:77765571-77765615                            | NM_134255:421      | Elov5      | INSIDE                 | 0.232                                           | 0.545                            | 2279.31             | 1242.80             | 0.127                            | 1766.07             | 223.49              |
| A_68_P22520449 | chr3:129236571-129236615                          | NM_130450:1289     | Elov6      | INSIDE                 | 0.516                                           | 0.523                            | 1307.01             | 683.74              | 0.270                            | 1073.46             | 289.89              |
| A_68_P22520456 | chr3:129237236-129237280                          | NM_130450:1955     | Elov6      | INSIDE                 | 0.493                                           | 0.615                            | 1443.86             | 888.58              | 0.303                            | 1109.90             | 336.77              |
| A_68_P29310181 | chr13:109005203-109005247                         | NM_029001:627      | Elov7      | INSIDE                 | 0.194                                           | 0.542                            | 1712.22             | 928.73              | 0.105                            | 1137.36             | 119.41              |
| A_68_P29310182 | chr13:109005275-109005324                         | NM_029001:702      | Elov7      | INSIDE                 | 0.198                                           | 0.580                            | 1308.98             | 758.75              | 0.115                            | 1013.94             | 116.38              |
| A_68_P24123511 | chr5:137358417-137358461                          | NM_024474:539      | Emid2      | INSIDE                 | 0.249                                           | 1.441                            | 6966.42             | 10040.89            | 0.358                            | 4715.86             | 1690.59             |
| A_68_P31333824 | chr17:71660558-71660602                           | NM_145158:-275     | Emilin2    | PROMOTER               | 0.511                                           | 0.673                            | 2729.26             | 1836.49             | 0.344                            | 2302.06             | 791.75              |
| A_68_P28672817 | chr12:100138890-100138934                         | NM_001081191:782   | Eml5       | INSIDE                 | 0.156                                           | 0.608                            | 2431.43             | 1478.25             | 0.095                            | 1894.60             | 179.73              |
| A_68_P27677356 | chr11:29924368-29924417                           | NM_146016:1641     | Eml6       | INSIDE                 | 0.102                                           | 2.039                            | 835.83              | 1704.43             | 0.208                            | 598.55              | 124.56              |
| A_68_P27677359 | chr11:29924618-29924662                           | NM_146016:1393     | Eml6       | INSIDE                 | 0.499                                           | 0.668                            | 1041.80             | 695.63              | 0.333                            | 875.65              | 291.61              |
| A_68_P27677361 | chr11:29924802-29924846                           | NM_146016:1209     | Eml6       | INSIDE                 | 0.542                                           | 0.668                            | 1041.82             | 695.84              | 0.362                            | 987.53              | 357.17              |
| A_68_P27677368 | chr11:29925763-29925807                           | NM_146016:249      | Eml6       | INSIDE                 | 0.244                                           | 0.608                            | 987.77              | 600.81              | 0.148                            | 830.95              | 123.13              |
| A_68_P30541580 | chr16:10313819-10313863                           | NM_007929:221      | Emp2       | INSIDE                 | 0.083                                           | 1.402                            | 7452.33             | 10446.84            | 0.117                            | 5020.15             | 586.06              |
| A_68_P24603555 | chr6:85137374-85137418                            | NM_010131:-528     | Emx1       | PROMOTER               | 0.057                                           | 0.637                            | 4927.83             | 3140.04             | 0.036                            | 3613.56             | 131.38              |
| A_68_P24603562 | chr6:85138183-85138227                            | NM_010131:280      | Emx1       | INSIDE                 | 0.627                                           | 0.674                            | 1104.60             | 744.62              | 0.423                            | 943.13              | 398.48              |
| A_68_P32219573 | chr19:59534086-59534130                           | NM_010132:929      | Emx2       | INSIDE                 | 0.487                                           | 0.383                            | 1447.80             | 554.09              | 0.186                            | 1176.86             | 219.13              |
| A_68_P32219644 | chr19:59541958-59542009                           | NM_010132:8804     | Emx2       | DOWNSTREAM             | 0.401                                           | 0.501                            | 1502.12             | 752.11              | 0.201                            | 1161.64             | 233.43              |
| A_68_P32219658 | chr19:59543743-59543787                           | NM_010132:10585    | Emx2       | DOWNSTREAM             | 0.518                                           | 0.571                            | 989.70              | 564.72              | 0.295                            | 803.68              | 237.39              |
| A_68_P32219504 | chr19:59526023-59526072                           | NR_002863:7078     | Emx2os     | INSIDE                 | 0.289                                           | 0.588                            | 883.92              | 519.35              | 0.170                            | 746.75              | 126.83              |
| A_68_P32219507 | chr19:59526323-59526367                           | NR_002863:6781     | Emx2os     | INSIDE                 | 0.222                                           | 0.539                            | 1342.15             | 723.59              | 0.120                            | 1009.85             | 120.74              |
| A_68_P20562764 | chr1:122500570-122500618                          | NM_010133:1531     | En1        | INSIDE                 | 0.221                                           | 0.507                            | 1330.92             | 674.70              | 0.112                            | 1069.33             | 120.02              |
| A_68_P23561108 | chr5:28492702-28492746                            | NM_010134:489      | En2        | INSIDE                 | 0.590                                           | 0.582                            | 1171.21             | 681.86              | 0.344                            | 1050.16             | 360.88              |
| A_68_P22863377 | chr4:41586983-41587027                            | NM_027147:331      | Enho       | INSIDE                 | 0.318                                           | 0.518                            | 2096.37             | 1085.56             | 0.165                            | 1714.52             | 282.75              |
| A_68_P23404989 | chr4:149610705-149610749                          | NM_023119:-579     | Eno1       | PROMOTER               | 0.253                                           | 0.699                            | 4196.06             | 2931.02             | 0.177                            | 3037.00             | 536.56              |
| A_68_P23404992 | chr4:149611119-149611164                          | NM_023119:-164     | Eno1       | PROMOTER               | 0.380                                           | 0.563                            | 1922.55             | 1081.72             | 0.214                            | 1383.68             | 295.56              |
| A_68_P24816932 | chr6:124719430-124719474                          | NM_013509:75       | Eno2       | INSIDE                 | 0.621                                           | 0.617                            | 3958.17             | 2442.02             | 0.383                            | 2813.88             | 1078.75             |
| A_68_P27901910 | chr11:70469767-70469811                           | NM_001136062:-926  | Eno3       | DIVERGENT_PROMOTER     | 0.100                                           | 0.582                            | 3006.37             | 1749.57             | 0.058                            | 2087.66             | 121.08              |
| A_68_P29737944 | chr14:77557089-77557133                           | NM_172813:488      | Enox1      | INSIDE                 | 0.096                                           | 0.619                            | 2862.54             | 1772.12             | 0.060                            | 2050.29             | 122.15              |
| A_68_P27010235 | chr10:24431971-24432016                           | NM_008813:-85      | Enpp1      | PROMOTER               | 0.211                                           | 1.551                            | 4773.09             | 7404.26             | 0.328                            | 3283.83             | 1077.11             |
| A_68_P28175184 | chr11:118860828-118860872                         | NM_001030291:11349 | Enpp7      | DOWNSTREAM             | 0.218                                           | 0.673                            | 1798.49             | 1209.95             | 0.147                            | 1236.34             | 181.69              |
| A_68_P28175187 | chr11:118861087-118861131                         | NM_001030291:11607 | Enpp7      | DOWNSTREAM             | 0.557                                           | 0.558                            | 1312.41             | 732.47              | 0.311                            | 959.99              | 298.16              |
| A_68_P21071852 | chr2:25251736-25251780                            | NM_009849:365      | Entpd2     | INSIDE                 | 0.657                                           | 0.679                            | 1003.25             | 681.27              | 0.446                            | 736.79              | 328.75              |
| A_68_P21740704 | chr2:150574793-150574837                          | NM_172117:-2       | Entpd6     | PROMOTER               | 0.183                                           | 0.432                            | 1946.95             | 841.04              | 0.079                            | 1573.74             | 124.63              |
| A_68_P32128057 | chr19:43764144-43764188                           | NM_053103:-12      | Entpd7     | PROMOTER               | 0.220                                           | 0.437                            | 1708.33             | 746.86              | 0.096                            | 1331.71             | 128.00              |
| A_68_P30180493 | chr15:44259134-44259178                           | NM_175009:-500     | Eny2       | PROMOTER               | 0.453                                           | 0.422                            | 1473.45             | 621.13              | 0.191                            | 1181.77             | 225.44              |
| A_68_P30378498 | chr15:81415923-81415967                           | NM_177821:-699     | Ep300      | PROMOTER               | 0.446                                           | 0.582                            | 2195.96             | 1278.50             | 0.260                            | 1852.88             | 481.32              |
| A_68_P30378500 | chr15:81416070-81416114                           | NM_177821:-551     | Ep300      | PROMOTER               | 0.528                                           | 0.676                            | 1310.47             | 885.42              | 0.357                            | 1049.19             | 374.23              |
| A_68_P30378506 | chr15:81416769-81416813                           | NM_177821:147      | Ep300      | INSIDE                 | 0.237                                           | 0.499                            | 2553.78             | 1274.79             | 0.118                            | 1810.22             | 214.05              |
| A_68_P23981800 | chr5:111199966-11200010                           | NM_029337:-252     | Ep400      | PROMOTER               | 0.272                                           | 0.306                            | 1779.38             | 543.62              | 0.083                            | 1446.64             | 120.14              |
| A_68_P31418980 | chr17:87152677-87152727                           | NM_010137:-501     | Epas1      | PROMOTER               | 0.233                                           | 0.437                            | 1621.88             | 708.25              | 0.102                            | 1324.91             | 134.92              |
| A_68_P31418994 | chr17:87154526-87154570                           | NM_010137:1345     | Epas1      | INSIDE                 | 0.551                                           | 0.645                            | 1176.05             | 758.34              | 0.356                            | 976.78              | 347.35              |

| ProbeName      | Target position of probe on CpG island microarray | TargetID          | GeneSymbol | CpG island Description | Ratio of relative methylation (TiO2-NP/Vehicle) | Sham group                       |                     |                     | TiO <sub>2</sub> -H group        |                     |                     |
|----------------|---------------------------------------------------|-------------------|------------|------------------------|-------------------------------------------------|----------------------------------|---------------------|---------------------|----------------------------------|---------------------|---------------------|
|                |                                                   |                   |            |                        |                                                 | Relative methylation (Cy-5/Cy-3) | Cy-3 signal (Input) | Cy-5 signal (MeDIP) | Relative methylation (Cy-5/Cy-3) | Cy-3 signal (Input) | Cy-5 signal (MeDIP) |
| A_68_P31418995 | chr17:87154659-87154703                           | NM_010137:1477    | Epas1      | INSIDE                 | 0.462                                           | 0.551                            | 1253.17             | 690.84              | 0.255                            | 983.82              | 250.56              |
| A_68_P21771129 | chr2:156247015-156247059                          | NM_001003815:249  | Epb4.111   | INSIDE                 | 0.239                                           | 0.591                            | 3749.62             | 2215.37             | 0.141                            | 2627.74             | 370.51              |
| A_68_P21771130 | chr2:156247152-156247196                          | NM_001003815:387  | Epb4.111   | INSIDE                 | 0.143                                           | 1.853                            | 2136.61             | 3959.67             | 0.264                            | 1540.17             | 407.01              |
| A_68_P31610604 | chr18:34166101-34166145                           | NM_013512:738     | Epb4.114a  | INSIDE                 | 0.428                                           | 0.570                            | 2976.61             | 1696.24             | 0.244                            | 2147.76             | 523.49              |
| A_68_P31610611 | chr18:34166774-34166818                           | NM_013512:64      | Epb4.114a  | INSIDE                 | 0.152                                           | 0.690                            | 1760.82             | 1215.32             | 0.105                            | 1416.16             | 148.78              |
| A_68_P31610612 | chr18:34166849-34166893                           | NM_013512:-10     | Epb4.114a  | PROMOTER               | 0.568                                           | 0.602                            | 1215.32             | 731.69              | 0.342                            | 930.00              | 317.78              |
| A_68_P22943680 | chr4:57155729-57155773                            | NM_019427:278     | Epb4.114b  | INSIDE                 | 0.276                                           | 0.484                            | 1090.05             | 528.11              | 0.134                            | 905.94              | 121.35              |
| A_68_P20558185 | chr1:121545078-121545122                          | NM_145506:477     | Epb4.115   | INSIDE                 | 0.591                                           | 0.534                            | 1283.66             | 686.03              | 0.316                            | 1047.29             | 330.86              |
| A_68_P20558188 | chr1:121545438-121545482                          | NM_145506:117     | Epb4.115   | INSIDE                 | 0.225                                           | 0.421                            | 2282.47             | 960.48              | 0.095                            | 1827.99             | 173.00              |
| A_68_P29702477 | chr14:71018142-71018186                           | NM_013514:11797   | Epb4.9     | INSIDE                 | 0.353                                           | 0.619                            | 1580.18             | 978.14              | 0.219                            | 1214.78             | 265.80              |
| A_68_P29702478 | chr14:71018216-71018260                           | NM_013514:11723   | Epb4.9     | INSIDE                 | 0.217                                           | 0.546                            | 1416.88             | 774.30              | 0.118                            | 1084.92             | 128.50              |
| A_68_P31473763 | chr18:6516415-6516459                             | NM_007935:-351    | Epc1       | PROMOTER               | 0.119                                           | 0.396                            | 3517.30             | 1394.07             | 0.047                            | 2585.96             | 122.12              |
| A_68_P21202304 | chr2:49307386-49307430                            | NM_172663:403     | Epc2       | INSIDE                 | 0.396                                           | 0.453                            | 2466.98             | 1117.64             | 0.179                            | 1901.54             | 341.08              |
| A_68_P28863232 | chr13:19711147-19711191                           | NM_134065:531     | Epdrl      | INSIDE                 | 0.324                                           | 0.475                            | 1194.76             | 568.01              | 0.154                            | 934.33              | 143.87              |
| A_68_P23270838 | chr4:124558750-124558797                          | NM_177671:-255    | Epha10     | PROMOTER               | 0.236                                           | 0.601                            | 981.03              | 589.78              | 0.142                            | 821.39              | 116.53              |
| A_68_P23270847 | chr4:124559714-124559758                          | NM_177671:708     | Epha10     | INSIDE                 | 0.388                                           | 0.609                            | 2152.03             | 1311.03             | 0.237                            | 1656.04             | 391.91              |
| A_68_P23270909 | chr4:124571706-124571750                          | NM_177671:12700   | Epha10     | DOWNSTREAM             | 0.285                                           | 0.701                            | 1547.42             | 1084.80             | 0.200                            | 1080.50             | 215.98              |
| A_68_P23270915 | chr4:124572399-124572443                          | NM_177671:13392   | Epha10     | DOWNSTREAM             | 0.203                                           | 0.637                            | 3074.52             | 1957.06             | 0.129                            | 2382.37             | 307.28              |
| A_68_P23363149 | chr4:140847557-140847601                          | NM_010139:-9576   | Epha2      | PROMOTER               | 0.449                                           | 0.512                            | 2369.62             | 1212.75             | 0.230                            | 2188.99             | 503.54              |
| A_68_P23363150 | chr4:140847720-140847764                          | NM_010139:-9412   | Epha2      | PROMOTER               | 0.443                                           | 0.548                            | 1558.73             | 853.96              | 0.243                            | 1193.32             | 289.60              |
| A_68_P23363213 | chr4:140857120-140857165                          | NM_010139:-12     | Epha2      | PROMOTER               | 0.104                                           | 1.529                            | 967.41              | 1478.91             | 0.159                            | 724.37              | 115.36              |
| A_68_P20366321 | chr1:77511149-77511206                            | NM_007936:486     | Epha4      | INSIDE                 | 0.298                                           | 0.640                            | 861.99              | 552.09              | 0.191                            | 639.72              | 122.06              |
| A_68_P20366327 | chr1:77511720-77511764                            | NM_007936:-79     | Epha4      | PROMOTER               | 0.425                                           | 0.615                            | 5264.01             | 3234.77             | 0.261                            | 3695.72             | 966.32              |
| A_68_P30801798 | chr16:60605990-60606034                           | NM_007938:-655    | Epha6      | PROMOTER               | 0.511                                           | 0.467                            | 1476.39             | 689.57              | 0.239                            | 1364.89             | 325.79              |
| A_68_P22803175 | chr4:28740439-28740495                            | NM_001122889:172  | Epha7      | INSIDE                 | 0.151                                           | 0.657                            | 2030.47             | 1333.44             | 0.099                            | 1663.44             | 164.59              |
| A_68_P22803176 | chr4:28740507-28740557                            | NM_001122889:238  | Epha7      | INSIDE                 | 0.245                                           | 0.609                            | 1487.17             | 905.80              | 0.149                            | 1091.94             | 162.87              |
| A_68_P22803177 | chr4:28740631-28740686                            | NM_001122889:364  | Epha7      | INSIDE                 | 0.225                                           | 0.622                            | 1204.78             | 749.81              | 0.140                            | 860.74              | 120.32              |
| A_68_P22803188 | chr4:28741959-28742006                            | NM_001122889:1688 | Epha7      | INSIDE                 | 0.610                                           | 0.475                            | 1383.03             | 657.36              | 0.290                            | 1197.30             | 347.26              |
| A_68_P22803192 | chr4:28742495-28742539                            | NM_001122889:2222 | Epha7      | INSIDE                 | 0.280                                           | 0.395                            | 2846.75             | 1124.65             | 0.110                            | 2230.06             | 246.37              |
| A_68_P26779719 | chr9:102255984-102256028                          | NM_001168296:1017 | Ephb1      | INSIDE                 | 0.231                                           | 0.492                            | 1373.43             | 676.13              | 0.114                            | 1048.05             | 119.08              |
| A_68_P26779727 | chr9:102256967-102257011                          | NM_001168296:35   | Ephb1      | INSIDE                 | 0.177                                           | 0.607                            | 4893.64             | 2968.88             | 0.107                            | 3316.01             | 355.60              |
| A_68_P23336240 | chr4:136390937-136390981                          | NM_010142:892     | Ephb2      | INSIDE                 | 0.572                                           | 0.459                            | 1492.56             | 684.86              | 0.262                            | 1120.00             | 293.71              |
| A_68_P23336251 | chr4:136392310-136392354                          | NM_010142:-482    | Ephb2      | PROMOTER               | 0.532                                           | 0.641                            | 1804.03             | 1156.03             | 0.341                            | 1498.37             | 510.35              |
| A_68_P23335796 | chr4:136327079-136327123                          | NM_010142:64750   | Ephb2      | INSIDE                 | 0.669                                           | 2.233                            | 1845.17             | 4120.32             | 1.493                            | 1478.72             | 2207.49             |
| A_68_P24125310 | chr5:137791448-137791492                          | NM_001159571:134  | Ephb4      | INSIDE                 | 0.343                                           | 0.541                            | 3935.14             | 2126.96             | 0.186                            | 3267.51             | 606.59              |
| A_68_P24125311 | chr5:137791525-137791569                          | NM_001159571:210  | Ephb4      | INSIDE                 | 0.601                                           | 0.588                            | 4521.60             | 2657.53             | 0.353                            | 3480.29             | 1229.09             |
| A_68_P24125355 | chr5:137799146-137799190                          | NM_001159571:7832 | Ephb4      | INSIDE                 | 0.655                                           | 2.823                            | 615.22              | 1736.53             | 1.848                            | 566.27              | 1046.42             |
| A_68_P31144187 | chr17:32326072-32326116                           | NM_001033163:314  | Ephx3      | INSIDE                 | 0.455                                           | 0.659                            | 856.19              | 564.20              | 0.300                            | 710.80              | 212.91              |
| A_68_P26940377 | chr10:11063537-11063581                           | NM_010146:316     | Epm2a      | INSIDE                 | 0.574                                           | 0.541                            | 1361.70             | 736.85              | 0.311                            | 1256.73             | 390.51              |
| A_68_P24952006 | chr7:5032174-5032218                              | NM_010147:290     | Epn1       | INSIDE                 | 0.618                                           | 0.674                            | 1203.37             | 811.37              | 0.417                            | 1007.89             | 419.94              |
| A_68_P28033281 | chr11:94352708-94352752                           | NM_027984:8558    | Epn3       | INSIDE                 | 0.418                                           | 0.713                            | 1812.06             | 1292.17             | 0.298                            | 1494.42             | 445.05              |
| A_68_P20900748 | chr1:187186729-187186773                          | NM_029735:-223    | Eprs       | PROMOTER               | 0.226                                           | 0.542                            | 1199.24             | 649.65              | 0.122                            | 981.95              | 120.28              |
| A_68_P27996720 | chr11:87684836-87684880                           | NM_007946:4180    | Epx        | INSIDE                 | 0.602                                           | 2.771                            | 723.69              | 2005.40             | 1.669                            | 593.25              | 990.38              |
| A_68_P28056287 | chr11:98273671-98273715                           | NM_001003817:-105 | Erb2       | PROMOTER               | 0.314                                           | 0.709                            | 1513.44             | 1072.42             | 0.223                            | 1206.13             | 268.51              |

| ProbeName      | Target position of probe on CpG island microarray | TargetID           | GeneSymbol | CpG island Description | Ratio of relative methylation (TiO2-NP/Vehicle) | Sham group                       |                     |                     | TiO <sub>2</sub> -H group        |                     |                     |
|----------------|---------------------------------------------------|--------------------|------------|------------------------|-------------------------------------------------|----------------------------------|---------------------|---------------------|----------------------------------|---------------------|---------------------|
|                |                                                   |                    |            |                        |                                                 | Relative methylation (Cy-5/Cy-3) | Cy-3 signal (Input) | Cy-5 signal (MeDIP) | Relative methylation (Cy-5/Cy-3) | Cy-3 signal (Input) | Cy-5 signal (MeDIP) |
| A_68_P28056288 | chr11:98273791-98273835                           | NM_001003817:15    | Erbp2      | INSIDE                 | 0.152                                           | 0.634                            | 4465.48             | 2830.37             | 0.096                            | 3259.86             | 313.39              |
| A_68_P29287622 | chr13:104710157-104710201                         | NM_001005868:416   | Erbp2ip    | INSIDE                 | 0.447                                           | 0.588                            | 906.33              | 532.94              | 0.263                            | 751.27              | 197.52              |
| A_68_P20317723 | chr1:69154010-69154069                            | NM_010154:594      | Erbp4      | INSIDE                 | 0.338                                           | 1.371                            | 1345.01             | 1844.25             | 0.463                            | 1261.90             | 584.09              |
| A_68_P20317730 | chr1:69154592-69154636                            | NM_010154:19       | Erbp4      | INSIDE                 | 0.392                                           | 0.422                            | 1426.54             | 601.74              | 0.165                            | 1216.30             | 201.21              |
| A_68_P29488027 | chr14:28436033-28436077                           | NM_177814:427      | Erc2       | INSIDE                 | 0.319                                           | 1.875                            | 4506.26             | 8451.34             | 0.599                            | 2846.84             | 1705.57             |
| A_68_P24992779 | chr7:19930361-19930405                            | NM_001127324:-37   | Erc1       | PROMOTER               | 0.166                                           | 0.644                            | 1912.46             | 1231.67             | 0.107                            | 1333.04             | 142.09              |
| A_68_P24992782 | chr7:19930618-19930662                            | NM_001127324:221   | Erc1       | INSIDE                 | 0.132                                           | 0.641                            | 2054.47             | 1316.54             | 0.085                            | 1416.51             | 119.88              |
| A_68_P29518106 | chr14:33327086-33327130                           | NM_001081221:402   | Erc6       | INSIDE                 | 0.231                                           | 0.598                            | 2380.00             | 1422.77             | 0.138                            | 1768.56             | 244.24              |
| A_68_P29309821 | chr13:108948883-108948927                         | NM_028042:-27      | Erc8       | DIVERGENT_PROMOTER     | 0.206                                           | 0.464                            | 2242.55             | 1041.49             | 0.095                            | 1640.73             | 156.61              |
| A_68_P29309824 | chr13:108949176-108949220                         | NM_028042:267      | Erc8       | INSIDE                 | 0.542                                           | 0.546                            | 937.84              | 512.42              | 0.296                            | 779.43              | 230.99              |
| A_68_P31111041 | chr17:26698638-26698682                           | NM_026170:204      | Ergic1     | INSIDE                 | 0.239                                           | 0.443                            | 1959.41             | 868.94              | 0.106                            | 1422.68             | 150.48              |
| A_68_P21768928 | chr2:155834064-155834108                          | NM_025516:226      | Ergic3     | INSIDE                 | 0.516                                           | 0.475                            | 2318.92             | 1100.41             | 0.245                            | 1700.86             | 416.77              |
| A_68_P28576810 | chr12:81744684-81744728                           | NM_007951:142      | Erh        | INSIDE                 | 0.479                                           | 0.739                            | 3291.02             | 2433.20             | 0.354                            | 2654.68             | 939.45              |
| A_68_P25672217 | chr8:14090101-14090145                            | NM_001034862:205   | Erich1     | INSIDE                 | 0.358                                           | 0.615                            | 2309.18             | 1420.87             | 0.220                            | 1697.74             | 374.12              |
| A_68_P32130261 | chr19:44144105-44144149                           | NM_145502:50       | Erlin1     | INSIDE                 | 0.575                                           | 0.546                            | 1589.93             | 868.54              | 0.314                            | 1403.40             | 440.59              |
| A_68_P32053973 | chr19:29700840-29700884                           | NM_001081213:22048 | Ermp1      | INSIDE                 | 0.638                                           | 3.951                            | 5484.76             | 21669.41            | 2.521                            | 4005.10             | 10097.35            |
| A_68_P28101900 | chr11:106349136-106349180                         | NM_023913:-48      | Ern1       | PROMOTER               | 0.421                                           | 0.508                            | 2320.57             | 1179.85             | 0.214                            | 1863.93             | 398.54              |
| A_68_P30497082 | chr15:102126996-102127044                         | NM_001014976:297   | Esp1       | INSIDE                 | 0.172                                           | 0.619                            | 1374.00             | 850.32              | 0.106                            | 1125.71             | 119.88              |
| A_68_P23416686 | chr4:151500208-151500252                          | NM_019585:2804     | Espn       | INSIDE                 | 0.246                                           | 0.673                            | 2026.10             | 1363.71             | 0.166                            | 1552.55             | 257.45              |
| A_68_P23416730 | chr4:151506015-151506059                          | NM_019585:-3002    | Espn       | PROMOTER               | 0.446                                           | 0.720                            | 3184.73             | 2291.50             | 0.321                            | 2404.06             | 771.46              |
| A_68_P23416731 | chr4:151506130-151506174                          | NM_019585:-3118    | Espn       | PROMOTER               | 0.261                                           | 0.742                            | 3064.47             | 2273.83             | 0.193                            | 2069.66             | 400.14              |
| A_68_P22729550 | chr4:11314133-11314177                            | NM_194055:-224     | Esrp1      | PROMOTER               | 0.414                                           | 0.637                            | 3420.97             | 2180.31             | 0.264                            | 2777.70             | 733.15              |
| A_68_P22729554 | chr4:11314649-11314704                            | NM_194055:-746     | Esrp1      | PROMOTER               | 0.265                                           | 0.627                            | 1378.65             | 864.11              | 0.166                            | 1081.67             | 179.97              |
| A_68_P26137945 | chr8:108660566-108660610                          | NM_176838:286      | Esp2       | INSIDE                 | 0.284                                           | 0.703                            | 2587.98             | 1818.11             | 0.200                            | 1926.67             | 384.79              |
| A_68_P26137946 | chr8:108660718-108660762                          | NM_176838:134      | Esp2       | INSIDE                 | 0.410                                           | 0.672                            | 6302.10             | 4233.59             | 0.275                            | 4092.88             | 1126.41             |
| A_68_P31936680 | chr19:6996479-6996523                             | NM_007953:-202     | Esrra      | PROMOTER               | 0.576                                           | 0.541                            | 1686.14             | 911.97              | 0.312                            | 1451.94             | 452.29              |
| A_68_P28609997 | chr12:87763078-87763133                           | NM_011934:512      | Esrrb      | INSIDE                 | 0.232                                           | 0.539                            | 1254.47             | 675.77              | 0.125                            | 972.41              | 121.42              |
| A_68_P28610001 | chr12:87763573-87763617                           | NM_011934:1001     | Esrrb      | INSIDE                 | 0.127                                           | 0.636                            | 3568.00             | 2268.71             | 0.081                            | 2543.10             | 205.08              |
| A_68_P28610002 | chr12:87763647-87763691                           | NM_011934:1075     | Esrrb      | INSIDE                 | 0.363                                           | 0.588                            | 2445.88             | 1437.16             | 0.213                            | 1696.19             | 362.02              |
| A_68_P32684275 | chrX:133652900-133652944                          | NM_007957:1943     | Esx1       | INSIDE                 | 0.182                                           | 1.491                            | 2353.02             | 3509.45             | 0.272                            | 820.08              | 223.06              |
| A_68_P27541863 | chr10:127962197-127962241                         | NM_011843:697      | Esytl      | INSIDE                 | 0.095                                           | 0.484                            | 3415.01             | 1653.85             | 0.046                            | 2501.62             | 115.69              |
| A_68_P27541866 | chr10:127962475-127962519                         | NM_011843:419      | Esytl      | INSIDE                 | 0.123                                           | 1.410                            | 999.92              | 1409.50             | 0.174                            | 685.70              | 119.16              |
| A_68_P27541867 | chr10:127962642-127962686                         | NM_011843:251      | Esytl      | INSIDE                 | 0.559                                           | 0.577                            | 1870.60             | 1080.15             | 0.323                            | 1422.16             | 459.21              |
| A_68_P27618338 | chr11:17853460-17853504                           | NM_026576:396      | Etaa1      | INSIDE                 | 0.131                                           | 0.309                            | 3631.53             | 1123.96             | 0.041                            | 3010.45             | 122.49              |
| A_68_P31615538 | chr18:35091084-35091128                           | NM_144866:551      | Etf1       | INSIDE                 | 0.510                                           | 0.632                            | 2002.13             | 1264.58             | 0.322                            | 1498.30             | 482.38              |
| A_68_P31615540 | chr18:35091234-35091284                           | NM_144866:399      | Etf1       | INSIDE                 | 0.150                                           | 0.657                            | 1663.12             | 1092.97             | 0.098                            | 1185.57             | 116.58              |
| A_68_P31615543 | chr18:35091590-35091634                           | NM_144866:45       | Etf1       | INSIDE                 | 0.246                                           | 0.471                            | 1215.83             | 572.78              | 0.116                            | 1023.61             | 118.81              |
| A_68_P31615546 | chr18:35092064-35092109                           | NM_144866:-429     | Etf1       | PROMOTER               | 0.150                                           | 0.482                            | 2393.05             | 1153.68             | 0.072                            | 1700.61             | 122.64              |
| A_68_P26531721 | chr9:55359505-55359549                            | NM_145615:524      | Etf2       | INSIDE                 | 0.214                                           | 0.669                            | 924.00              | 618.42              | 0.144                            | 808.91              | 116.11              |
| A_68_P26531723 | chr9:55359728-55359772                            | NM_145615:300      | Etf2       | INSIDE                 | 0.548                                           | 0.568                            | 1555.05             | 882.77              | 0.311                            | 1334.06             | 414.85              |
| A_68_P25082380 | chr7:50699539-50699583                            | NM_026695:48       | Etfb       | INSIDE                 | 0.129                                           | 0.584                            | 2169.19             | 1267.53             | 0.075                            | 1600.96             | 120.22              |
| A_68_P25082496 | chr7:50720344-50720388                            | NM_026695:20854    | Etfb       | DOWNSTREAM             | 0.366                                           | 0.528                            | 3554.86             | 1878.03             | 0.193                            | 2621.67             | 506.75              |
| A_68_P30988901 | chr16:95923763-95923807                           | NM_011809:-229     | Ets2       | PROMOTER               | 0.455                                           | 0.704                            | 1608.77             | 1131.97             | 0.320                            | 1315.41             | 421.38              |
| A_68_P30988904 | chr16:95924063-95924107                           | NM_011809:71       | Ets2       | INSIDE                 | 0.337                                           | 0.740                            | 3358.88             | 2485.54             | 0.250                            | 2387.72             | 596.09              |

| ProbeName      | Target position of probe on CpG island microarray | TargetID         | GeneSymbol    | CpG island Description | Ratio of relative methylation (TiO2-NP/Vehicle) | Sham group                       |                     |                     | TiO <sub>2</sub> -H group        |                     |                     |
|----------------|---------------------------------------------------|------------------|---------------|------------------------|-------------------------------------------------|----------------------------------|---------------------|---------------------|----------------------------------|---------------------|---------------------|
|                |                                                   |                  |               |                        |                                                 | Relative methylation (Cy-5/Cy-3) | Cy-3 signal (Input) | Cy-5 signal (MeDIP) | Relative methylation (Cy-5/Cy-3) | Cy-3 signal (Input) | Cy-5 signal (MeDIP) |
| A_68_P22308548 | chr3:87329844-87329888                            | NM_001083318:367 | Etv3          | INSIDE                 | 0.504                                           | 0.497                            | 1438.35             | 715.39              | 0.251                            | 1087.17             | 272.68              |
| A_68_P28075719 | chr11:101646593-101646637                         | NM_008815:10     | Etv4          | INSIDE                 | 0.264                                           | 0.387                            | 1398.33             | 541.09              | 0.102                            | 1162.02             | 118.63              |
| A_68_P24859168 | chr6:133985011-133985055                          | NM_007961:-692   | Etv6          | PROMOTER               | 0.339                                           | 0.684                            | 2321.36             | 1588.07             | 0.232                            | 1712.62             | 397.63              |
| A_68_P23613114 | chr5:37728265-37728310                            | NM_021292:-167   | Evc           | DIVERGENT_PROMOTER     | 0.177                                           | 0.579                            | 1583.03             | 916.19              | 0.102                            | 1174.62             | 120.25              |
| A_68_P23969234 | chr5:108298178-108298222                          | NM_007964:5926   | Evi5          | INSIDE                 | 0.644                                           | 0.636                            | 1399.66             | 890.76              | 0.410                            | 1169.91             | 479.42              |
| A_68_P25616318 | chr8:4166571-4166615                              | NM_001039578:26  | Evi5l         | INSIDE                 | 0.569                                           | 0.727                            | 3763.31             | 2734.40             | 0.413                            | 3072.69             | 1269.57             |
| A_68_P25616319 | chr8:4166672-4166716                              | NM_001039578:128 | Evi5l         | INSIDE                 | 0.608                                           | 0.490                            | 2932.47             | 1437.51             | 0.298                            | 2388.07             | 711.77              |
| A_68_P28158191 | chr11:116099429-116099473                         | NM_025276:-45    | Evp1          | PROMOTER               | 0.390                                           | 0.689                            | 1292.37             | 890.62              | 0.269                            | 1148.19             | 308.81              |
| A_68_P24449832 | chr6:52260556-52260605                            | NM_007966:-2911  | Evx1          | PROMOTER               | 0.192                                           | 0.640                            | 1276.58             | 816.42              | 0.123                            | 967.19              | 118.81              |
| A_68_P24449834 | chr6:52260814-52260866                            | NM_007966:-2651  | Evx1          | PROMOTER               | 0.282                                           | 0.540                            | 1031.45             | 557.14              | 0.153                            | 762.12              | 116.28              |
| A_68_P24449858 | chr6:52263643-52263687                            | NM_007966:173    | Evx1          | INSIDE                 | 0.651                                           | 0.440                            | 1586.70             | 698.08              | 0.286                            | 1311.23             | 375.36              |
| A_68_P21338549 | chr2:74494232-74494276                            | NM_007967:3222   | Evx2          | INSIDE                 | 0.535                                           | 0.346                            | 2116.62             | 731.62              | 0.185                            | 1745.05             | 322.58              |
| A_68_P21570230 | chr2:119372732-119372776                          | NM_172857:609    | Exd1          | INSIDE                 | 0.635                                           | 0.549                            | 1903.16             | 1044.28             | 0.349                            | 1615.08             | 563.12              |
| A_68_P21570231 | chr2:119372809-119372853                          | NM_172857:533    | Exd1          | INSIDE                 | 0.525                                           | 0.591                            | 1897.79             | 1122.21             | 0.310                            | 1620.11             | 502.83              |
| A_68_P28575796 | chr12:81564448-81564492                           | NM_133798:389    | Exd2          | INSIDE                 | 0.313                                           | 0.562                            | 1070.64             | 601.76              | 0.176                            | 932.09              | 164.02              |
| A_68_P29144944 | chr13:74346071-74346115                           | NM_177333:56     | Exoc3         | INSIDE                 | 0.475                                           | 0.623                            | 3066.97             | 1910.91             | 0.296                            | 2497.47             | 739.39              |
| A_68_P26132766 | chr8:107813805-107813857                          | NM_177788:6168   | Exoc3l        | INSIDE                 | 0.188                                           | 0.666                            | 1471.32             | 979.44              | 0.125                            | 948.32              | 118.81              |
| A_68_P26132768 | chr8:107814026-107814070                          | NM_177788:5950   | Exoc3l        | INSIDE                 | 0.283                                           | 0.585                            | 3362.80             | 1968.90             | 0.166                            | 2244.27             | 371.46              |
| A_68_P24602877 | chr6:85019040-85019084                            | NM_177077:445    | Exoc6b        | INSIDE                 | 0.468                                           | 0.490                            | 1377.13             | 674.50              | 0.229                            | 1065.92             | 244.36              |
| A_68_P26248320 | chr8:127420438-127420486                          | NM_198103:1143   | Exoc8         | INSIDE                 | 0.290                                           | 1.552                            | 928.99              | 1442.11             | 0.450                            | 780.54              | 351.57              |
| A_68_P26248321 | chr8:127420511-127420555                          | NM_198103:1073   | Exoc8         | INSIDE                 | 0.358                                           | 1.456                            | 1115.06             | 1623.27             | 0.521                            | 904.14              | 471.20              |
| A_68_P32117991 | chr19:42007492-42007537                           | NM_001164561:290 | Exosc1        | INSIDE                 | 0.213                                           | 0.591                            | 3443.25             | 2036.05             | 0.126                            | 2579.87             | 324.38              |
| A_68_P32117993 | chr19:42007635-42007679                           | NM_001164561:148 | Exosc1        | INSIDE                 | 0.455                                           | 0.493                            | 1540.43             | 759.64              | 0.225                            | 1328.72             | 298.39              |
| A_68_P23395155 | chr4:147932643-147932687                          | NM_016699:129    | Exosc10       | INSIDE                 | 0.485                                           | 0.586                            | 886.56              | 519.22              | 0.284                            | 766.71              | 217.58              |
| A_68_P25011168 | chr7:26444266-26444310                            | NM_138586:117    | Exosc5        | INSIDE                 | 0.290                                           | 0.569                            | 3894.44             | 2214.29             | 0.165                            | 2797.00             | 460.86              |
| A_68_P26893205 | chr9:123022399-123022443                          | NM_001081188:72  | Exosc7        | INSIDE                 | 0.634                                           | 0.444                            | 1766.43             | 783.61              | 0.281                            | 1468.20             | 413.17              |
| A_68_P26893206 | chr9:123022552-123022596                          | NM_001081188:226 | Exosc7        | INSIDE                 | 0.460                                           | 0.574                            | 1057.47             | 606.69              | 0.264                            | 795.13              | 209.92              |
| A_68_P26893207 | chr9:123022692-123022739                          | NM_001081188:367 | Exosc7        | INSIDE                 | 0.114                                           | 2.117                            | 1044.95             | 2211.92             | 0.242                            | 763.78              | 184.76              |
| A_68_P22149452 | chr3:54538552-54538602                            | NM_001163570:710 | Exosc8        | INSIDE                 | 0.447                                           | 0.611                            | 1174.63             | 717.56              | 0.273                            | 917.47              | 250.67              |
| A_68_P22149457 | chr3:54539042-54539086                            | NM_001163570:222 | Exosc8        | INSIDE                 | 0.460                                           | 0.630                            | 1649.62             | 1039.92             | 0.290                            | 1283.20             | 372.50              |
| A_68_P22149458 | chr3:54539187-54539231                            | NM_001163570:78  | Exosc8        | INSIDE                 | 0.494                                           | 0.560                            | 2287.99             | 1281.08             | 0.276                            | 1736.72             | 479.98              |
| A_68_P22149459 | chr3:54539268-54539312                            | NM_001163570:4   | Exosc8        | DIVERGENT_PROMOTER     | 0.367                                           | 0.619                            | 1633.62             | 1012.02             | 0.227                            | 1454.55             | 330.87              |
| A_68_P30221114 | chr15:53176756-53176800                           | NM_010162:960    | Ext1          | INSIDE                 | 0.243                                           | 0.723                            | 3801.24             | 2749.66             | 0.176                            | 2835.52             | 499.15              |
| A_68_P30221120 | chr15:53177342-53177386                           | NM_010162:374    | Ext1          | INSIDE                 | 0.078                                           | 0.582                            | 3731.61             | 2170.97             | 0.045                            | 2615.44             | 118.71              |
| A_68_P29671494 | chr14:65696542-65696586                           | NM_018788:20379  | Extl3         | INSIDE                 | 0.568                                           | 2.377                            | 2904.76             | 6904.49             | 1.350                            | 2132.45             | 2879.37             |
| A_68_P29671617 | chr14:65716487-65716531                           | NM_018788:435    | Extl3         | INSIDE                 | 0.609                                           | 0.447                            | 1700.67             | 759.39              | 0.272                            | 1422.87             | 386.99              |
| A_68_P28072730 | chr11:101087587-101087631                         | NM_007970:156    | Ezh1          | INSIDE                 | 0.439                                           | 0.537                            | 2728.69             | 1465.05             | 0.235                            | 2056.54             | 484.28              |
| A_68_P24423931 | chr6:47544220-47544264                            | NM_001146689:787 | Ezh2          | INSIDE                 | 0.284                                           | 0.462                            | 1665.91             | 770.07              | 0.131                            | 1313.21             | 172.63              |
| A_68_P24423937 | chr6:47544969-47545013                            | NM_001146689:39  | Ezh2          | INSIDE                 | 0.638                                           | 0.644                            | 1090.33             | 701.77              | 0.410                            | 976.73              | 400.80              |
| A_68_P31022580 | chr17:6986963-6987007                             | NM_009510:145    | Ezr           | INSIDE                 | 0.490                                           | 0.450                            | 1493.85             | 671.80              | 0.220                            | 1262.16             | 277.97              |
| A_68_P20827965 | chr1:173367690-173367734                          | NM_172647:21     | F11r          | INSIDE                 | 0.230                                           | 0.607                            | 1412.46             | 858.03              | 0.139                            | 1210.79             | 168.87              |
| A_68_P20827968 | chr1:173368006-173368050                          | NM_172647:337    | F11r          | INSIDE                 | 0.464                                           | 0.415                            | 2052.28             | 852.34              | 0.193                            | 1636.65             | 315.13              |
| A_68_P29241614 | chr13:96388371-96388415                           | NM_010169:-4     | F2r           | PROMOTER               | 0.344                                           | 0.540                            | 2019.99             | 1091.38             | 0.186                            | 1478.25             | 275.00              |
| A_68_P27289145 | chr10:80826688-80826732                           | NM_028657:6396   | F630110N24Rik | INSIDE                 | 0.346                                           | 0.566                            | 913.40              | 517.16              | 0.196                            | 674.88              | 132.15              |



| ProbeName      | Target position of probe on CpG island microarray | TargetID          | GeneSymbol    | CpG island Description | Ratio of relative methylation (TiO2-NP/Vehicle) | Sham group                       |                     |                     | TiO <sub>2</sub> -H group        |                     |                     |
|----------------|---------------------------------------------------|-------------------|---------------|------------------------|-------------------------------------------------|----------------------------------|---------------------|---------------------|----------------------------------|---------------------|---------------------|
|                |                                                   |                   |               |                        |                                                 | Relative methylation (Cy-5/Cy-3) | Cy-3 signal (Input) | Cy-5 signal (MeDIP) | Relative methylation (Cy-5/Cy-3) | Cy-3 signal (Input) | Cy-5 signal (MeDIP) |
| A_68_P28340239 | chr12:33832233-33832277                           | NR_015602:197     | F730043M19Rik | INSIDE                 | 0.239                                           | 0.626                            | 1297.81             | 812.88              | 0.150                            | 996.94              | 149.17              |
| A_68_P32461568 | chrX:70473551-70473595                            | NM_007978:-72     | F8a           | PROMOTER               | 0.319                                           | 1.492                            | 1712.51             | 2555.71             | 0.476                            | 617.47              | 293.75              |
| A_68_P32461576 | chrX:70474445-70474489                            | NM_007978:822     | F8a           | INSIDE                 | 0.139                                           | 2.026                            | 1120.02             | 2269.46             | 0.282                            | 438.88              | 123.64              |
| A_68_P27865450 | chr11:64250200-64250244                           | NR_028445:-46     | F930015N05Rik | PROMOTER               | 0.349                                           | 0.551                            | 1324.97             | 729.95              | 0.192                            | 1103.99             | 212.10              |
| A_68_P26168090 | chr8:113917279-113917323                          | NM_178086:421     | Fa2h          | INSIDE                 | 0.420                                           | 0.691                            | 1285.10             | 888.34              | 0.290                            | 1056.43             | 306.48              |
| A_68_P23227292 | chr4:115689902-115689946                          | NM_010173:583     | Faah          | INSIDE                 | 0.477                                           | 0.496                            | 1430.53             | 709.23              | 0.236                            | 1154.19             | 272.86              |
| A_68_P23227295 | chr4:115690207-115690251                          | NM_010173:279     | Faah          | INSIDE                 | 0.525                                           | 0.549                            | 2199.10             | 1207.29             | 0.288                            | 2005.15             | 577.49              |
| A_68_P23301437 | chr4:129985225-129985269                          | NM_010174:-775    | Fabp3         | PROMOTER               | 0.312                                           | 0.537                            | 3055.68             | 1641.66             | 0.168                            | 2365.91             | 397.16              |
| A_68_P23301440 | chr4:129985621-129985680                          | NM_010174:-371    | Fabp3         | PROMOTER               | 0.022                                           | 2.767                            | 2315.19             | 6404.98             | 0.062                            | 1915.62             | 118.89              |
| A_68_P23301441 | chr4:129985717-129985761                          | NM_010174:-283    | Fabp3         | PROMOTER               | 0.143                                           | 2.006                            | 3897.41             | 7818.90             | 0.286                            | 2360.07             | 675.17              |
| A_68_P21940380 | chr3:10012548-10012592                            | NM_010634:-35     | Fabp5         | PROMOTER               | 0.197                                           | 0.731                            | 3055.98             | 2235.36             | 0.144                            | 2143.35             | 308.92              |
| A_68_P31948839 | chr19:10257741-10257785                           | NM_146094:385     | Fads1         | INSIDE                 | 0.169                                           | 0.606                            | 2386.06             | 1446.42             | 0.103                            | 1881.63             | 192.95              |
| A_68_P31948840 | chr19:10257815-10257859                           | NM_146094:459     | Fads1         | INSIDE                 | 0.197                                           | 0.627                            | 2789.64             | 1750.15             | 0.124                            | 2230.46             | 275.56              |
| A_68_P31948448 | chr19:10175771-10175815                           | NM_019699:201     | Fads2         | INSIDE                 | 0.665                                           | 0.622                            | 1068.35             | 664.43              | 0.414                            | 824.89              | 341.19              |
| A_68_P31948451 | chr19:10176193-10176237                           | NM_019699:-221    | Fads2         | PROMOTER               | 0.346                                           | 0.488                            | 1341.38             | 654.93              | 0.169                            | 1059.29             | 178.79              |
| A_68_P31948452 | chr19:10176316-10176360                           | NM_019699:-345    | Fads2         | PROMOTER               | 0.409                                           | 0.572                            | 1284.29             | 734.28              | 0.234                            | 1045.44             | 244.33              |
| A_68_P31948068 | chr19:10116519-10116563                           | NM_021890:503     | Fads3         | INSIDE                 | 0.178                                           | 0.600                            | 1581.44             | 948.93              | 0.107                            | 1133.36             | 120.95              |
| A_68_P28152627 | chr11:115158906-115158950                         | NM_178035:-68     | Fads6         | DIVERGENT_PROMOTER     | 0.529                                           | 0.592                            | 1506.01             | 892.06              | 0.313                            | 1283.10             | 402.22              |
| A_68_P23202061 | chr4:109349433-109349477                          | NM_007983:223     | Faf1          | INSIDE                 | 0.426                                           | 0.363                            | 1627.53             | 590.92              | 0.155                            | 1325.49             | 204.86              |
| A_68_P23202063 | chr4:109349653-109349697                          | NM_007983:443     | Faf1          | INSIDE                 | 0.294                                           | 0.447                            | 2022.94             | 904.09              | 0.131                            | 1611.81             | 211.86              |
| A_68_P29050431 | chr13:54723325-54723369                           | NM_178397:202     | Faf2          | INSIDE                 | 0.200                                           | 0.592                            | 1357.03             | 803.83              | 0.118                            | 992.95              | 117.46              |
| A_68_P25289617 | chr7:91754287-91754332                            | NM_010176:143     | Fah           | INSIDE                 | 0.038                                           | 1.364                            | 3888.45             | 5304.05             | 0.052                            | 2397.88             | 124.31              |
| A_68_P31099851 | chr17:24986997-24987041                           | NM_023480:229     | Fahd1         | INSIDE                 | 0.273                                           | 0.608                            | 945.82              | 575.36              | 0.166                            | 731.33              | 121.44              |
| A_68_P26761637 | chr9:98886525-98886573                            | NM_001122851:-243 | Faim          | PROMOTER               | 0.300                                           | 0.342                            | 1574.82             | 538.81              | 0.103                            | 1150.49             | 118.07              |
| A_68_P26761639 | chr9:98886751-98886795                            | NM_001122851:-19  | Faim          | PROMOTER               | 0.351                                           | 0.484                            | 3000.49             | 1451.66             | 0.170                            | 2317.14             | 393.58              |
| A_68_P26761641 | chr9:98887034-98887078                            | NM_001122851:265  | Faim          | INSIDE                 | 0.442                                           | 0.599                            | 2072.05             | 1241.28             | 0.265                            | 1863.64             | 493.75              |
| A_68_P20612315 | chr1:132774907-132774951                          | NM_026976:12575   | Faim3         | INSIDE                 | 0.550                                           | 0.439                            | 1576.37             | 691.78              | 0.241                            | 1307.67             | 315.70              |
| A_68_P20612316 | chr1:132774985-132775029                          | NM_026976:12653   | Faim3         | INSIDE                 | 0.509                                           | 0.366                            | 1452.22             | 531.65              | 0.186                            | 1143.31             | 213.05              |
| A_68_P30512413 | chr16:4879317-4879361                             | NM_145359:513     | Fam100a       | INSIDE                 | 0.648                                           | 0.533                            | 1151.90             | 614.17              | 0.346                            | 819.29              | 283.16              |
| A_68_P30512427 | chr16:4880947-4880994                             | NM_145359:-1119   | Fam100a       | DIVERGENT_PROMOTER     | 0.341                                           | 0.480                            | 1328.98             | 638.19              | 0.164                            | 886.08              | 144.97              |
| A_68_P21115862 | chr2:32390731-32390776                            | NM_153560:-125    | Fam102a       | PROMOTER               | 0.493                                           | 0.363                            | 1535.39             | 557.81              | 0.179                            | 1201.38             | 215.36              |
| A_68_P25273836 | chr7:88907300-88907346                            | NM_025997:-516    | Fam103a1      | PROMOTER               | 0.447                                           | 0.581                            | 1321.11             | 767.84              | 0.260                            | 919.68              | 239.14              |
| A_68_P25273840 | chr7:88907783-88907827                            | NM_025997:-34     | Fam103a1      | PROMOTER               | 0.436                                           | 0.587                            | 1312.42             | 770.10              | 0.256                            | 1072.47             | 274.12              |
| A_68_P25273842 | chr7:88907926-88907970                            | NM_025997:110     | Fam103a1      | INSIDE                 | 0.214                                           | 0.506                            | 1396.06             | 705.75              | 0.108                            | 1135.26             | 122.96              |
| A_68_P25273844 | chr7:88908139-88908183                            | NM_025997:322     | Fam103a1      | INSIDE                 | 0.511                                           | 0.550                            | 982.21              | 539.94              | 0.281                            | 705.12              | 198.12              |
| A_68_P30093915 | chr15:27610984-27611028                           | NM_198301:247     | Fam105a       | INSIDE                 | 0.651                                           | 0.684                            | 2057.35             | 1406.39             | 0.445                            | 1708.53             | 760.09              |
| A_68_P21746892 | chr2:151796494-151796538                          | NM_028666:3194    | Fam110a       | INSIDE                 | 0.260                                           | 1.403                            | 954.40              | 1339.09             | 0.364                            | 679.62              | 247.63              |
| A_68_P22702206 | chr4:5571678-5571722                              | NM_173426:375     | Fam110b       | INSIDE                 | 0.387                                           | 0.654                            | 1996.63             | 1304.95             | 0.253                            | 1615.37             | 408.64              |
| A_68_P21629724 | chr2:130250001-130250045                          | NM_178762:2       | Fam113a       | INSIDE                 | 0.215                                           | 0.452                            | 1530.22             | 692.37              | 0.097                            | 1217.98             | 118.45              |
| A_68_P21629726 | chr2:130250214-130250258                          | NM_001114541:141  | Fam113a       | INSIDE                 | 0.471                                           | 0.515                            | 1386.82             | 714.78              | 0.243                            | 1080.77             | 262.17              |
| A_68_P27826023 | chr11:57331958-57332002                           | NM_001168667:166  | Fam114a2      | INSIDE                 | 0.267                                           | 0.523                            | 3648.60             | 1906.86             | 0.140                            | 2548.04             | 355.69              |
| A_68_P30423843 | chr15:89027122-89027166                           | NM_027081:-239    | Fam116b       | PROMOTER               | 0.195                                           | 0.559                            | 1347.01             | 752.51              | 0.109                            | 1113.67             | 121.29              |
| A_68_P28038138 | chr11:95198892-95198936                           | NM_172543:583     | Fam117a       | INSIDE                 | 0.240                                           | 1.589                            | 7638.24             | 12136.56            | 0.381                            | 4870.98             | 1855.31             |
| A_68_P20266463 | chr11:59970586-59970630                           | NM_001037725:759  | Fam117b       | INSIDE                 | 0.531                                           | 0.741                            | 2514.61             | 1862.46             | 0.393                            | 2202.29             | 865.86              |

| ProbeName      | Target position of probe on CpG island microarray | TargetID            | GeneSymbol | CpG island Description | Ratio of relative methylation (TiO2-NP/Vehicle) | Sham group                       |                     |                     | TiO <sub>2</sub> -H group        |                     |                     |
|----------------|---------------------------------------------------|---------------------|------------|------------------------|-------------------------------------------------|----------------------------------|---------------------|---------------------|----------------------------------|---------------------|---------------------|
|                |                                                   |                     |            |                        |                                                 | Relative methylation (Cy-5/Cy-3) | Cy-3 signal (Input) | Cy-5 signal (MeDIP) | Relative methylation (Cy-5/Cy-3) | Cy-3 signal (Input) | Cy-5 signal (MeDIP) |
| A_68_P26421597 | chr9:35075221-35075265                            | NM_194257:110       | Fam118b    | INSIDE                 | 0.493                                           | 0.560                            | 1163.26             | 651.81              | 0.276                            | 933.09              | 257.77              |
| A_68_P32023816 | chr19:24551478-24551522                           | NM_026520:464       | Fam122a    | INSIDE                 | 0.264                                           | 0.556                            | 1049.22             | 583.33              | 0.147                            | 820.35              | 120.62              |
| A_68_P32386814 | chrX:50622922-50622968                            | NM_001166365:38     | Fam122b    | INSIDE                 | 0.387                                           | 3.956                            | 2049.73             | 8109.44             | 1.532                            | 750.92              | 1150.54             |
| A_68_P29644188 | chr14:60997183-60997227                           | NM_001164705:82     | Fam123a    | INSIDE                 | 0.656                                           | 0.550                            | 1771.93             | 975.27              | 0.361                            | 1433.61             | 517.39              |
| A_68_P29644190 | chr14:60997369-60997413                           | NM_001164705:268    | Fam123a    | INSIDE                 | 0.343                                           | 0.602                            | 1906.14             | 1146.59             | 0.206                            | 1505.08             | 310.69              |
| A_68_P25957388 | chr8:74066580-74066624                            | NM_028617:-226      | Fam125a    | DIVERGENT_PROMOTER     | 0.654                                           | 0.603                            | 1064.35             | 641.34              | 0.394                            | 853.31              | 336.09              |
| A_68_P25957393 | chr8:74067094-74067138                            | NM_028617:288       | Fam125a    | INSIDE                 | 0.383                                           | 0.717                            | 2146.50             | 1538.78             | 0.274                            | 1662.90             | 456.22              |
| A_68_P25957394 | chr8:74067191-74067235                            | NM_028617:384       | Fam125a    | INSIDE                 | 0.248                                           | 1.361                            | 4553.28             | 6199.19             | 0.337                            | 2935.43             | 989.97              |
| A_68_P23539565 | chr5:23536003-23536047                            | NM_053090:477       | Fam126a    | INSIDE                 | 0.542                                           | 0.540                            | 2375.65             | 1283.56             | 0.293                            | 1969.12             | 576.23              |
| A_68_P23539567 | chr5:23536236-23536280                            | NM_053090:243       | Fam126a    | INSIDE                 | 0.580                                           | 0.532                            | 1173.13             | 624.22              | 0.309                            | 1009.61             | 311.81              |
| A_68_P23539568 | chr5:23536418-23536462                            | NM_053090:61        | Fam126a    | INSIDE                 | 0.388                                           | 0.364                            | 2141.71             | 779.58              | 0.141                            | 1832.65             | 259.00              |
| A_68_P20259678 | chr1:58643163-58643207                            | NM_172513:-7        | Fam126b    | DIVERGENT_PROMOTER     | 0.152                                           | 0.600                            | 1947.22             | 1167.79             | 0.091                            | 1468.06             | 133.54              |
| A_68_P25957748 | chr8:74126235-74126279                            | NM_001166213:4712   | Fam129c    | INSIDE                 | 0.473                                           | 0.476                            | 1866.23             | 888.43              | 0.225                            | 1409.07             | 317.59              |
| A_68_P25957752 | chr8:74126620-74126664                            | NM_001166213:5098   | Fam129c    | INSIDE                 | 0.307                                           | 0.565                            | 1846.74             | 1043.92             | 0.174                            | 1386.55             | 240.96              |
| A_68_P30589002 | chr16:20693547-20693591                           | NM_133778:-1561     | Fam131a    | PROMOTER               | 0.442                                           | 1.654                            | 4680.12             | 7740.39             | 0.730                            | 3109.04             | 2270.27             |
| A_68_P30589004 | chr16:20693747-20693792                           | NM_133778:-1360     | Fam131a    | PROMOTER               | 0.290                                           | 0.623                            | 818.12              | 509.47              | 0.180                            | 636.34              | 114.76              |
| A_68_P30589022 | chr16:20695936-20695980                           | NM_133778:829       | Fam131a    | INSIDE                 | 0.583                                           | 0.481                            | 1123.15             | 539.78              | 0.280                            | 885.61              | 248.13              |
| A_68_P24397654 | chr6:42274034-42274078                            | NM_001113327:583    | Fam131b    | INSIDE                 | 0.236                                           | 0.478                            | 2129.41             | 1016.84             | 0.112                            | 1648.23             | 185.38              |
| A_68_P24397655 | chr6:42274146-42274190                            | NM_001113327:471    | Fam131b    | INSIDE                 | 0.108                                           | 0.546                            | 3761.64             | 2052.52             | 0.059                            | 2354.77             | 138.42              |
| A_68_P23363642 | chr4:140924465-140924509                          | NM_001085513:352    | Fam131c    | INSIDE                 | 0.519                                           | 0.558                            | 2287.61             | 1275.69             | 0.289                            | 1791.64             | 518.35              |
| A_68_P23363728 | chr4:140938466-140938511                          | NM_001085513:14354  | Fam131c    | INSIDE                 | 0.207                                           | 0.668                            | 2729.78             | 1822.27             | 0.138                            | 1996.94             | 275.52              |
| A_68_P23363729 | chr4:140938544-140938588                          | NM_001085513:14432  | Fam131c    | INSIDE                 | 0.210                                           | 0.349                            | 2605.47             | 909.22              | 0.073                            | 2026.32             | 148.37              |
| A_68_P20442008 | chr1:93262992-93263036                            | NM_173395:8         | Fam132b    | INSIDE                 | 0.524                                           | 0.623                            | 3507.65             | 2185.83             | 0.326                            | 2714.21             | 885.50              |
| A_68_P20352246 | chr1:75139198-75139242                            | NM_170755:-139      | Fam134a    | DIVERGENT_PROMOTER     | 0.284                                           | 0.487                            | 2793.58             | 1360.33             | 0.138                            | 2206.11             | 305.33              |
| A_68_P30083648 | chr15:25772800-25772844                           | NM_001034851:-196   | Fam134b    | PROMOTER               | 0.614                                           | 0.680                            | 2093.85             | 1424.58             | 0.418                            | 1793.37             | 748.82              |
| A_68_P28072082 | chr11:100981134-100981178                         | NM_026501:-18       | Fam134c    | PROMOTER               | 0.347                                           | 0.560                            | 1409.76             | 789.69              | 0.194                            | 1110.88             | 215.98              |
| A_68_P20091639 | chr1:24106505-24106549                            | NM_026604:654       | Fam135a    | INSIDE                 | 0.291                                           | 0.529                            | 1272.08             | 672.54              | 0.154                            | 1041.98             | 160.09              |
| A_68_P24609727 | chr6:86315530-86315574                            | NM_025591:-124      | Fam136a    | PROMOTER               | 0.339                                           | 0.705                            | 6052.97             | 4269.05             | 0.239                            | 4767.19             | 1140.80             |
| A_68_P24609728 | chr6:86315617-86315661                            | NM_025591:-38       | Fam136a    | PROMOTER               | 0.540                                           | 0.717                            | 3758.40             | 2694.67             | 0.387                            | 2969.11             | 1150.06             |
| A_68_P20012308 | chr1:6349244-6349288                              | NM_001195732:-145   | Fam150a    | PROMOTER               | 0.220                                           | 0.552                            | 1876.32             | 1035.36             | 0.122                            | 1483.36             | 180.38              |
| A_68_P23195773 | chr4:108056312-108056356                          | NM_001099303:-380   | Fam159a    | PROMOTER               | 0.248                                           | 0.608                            | 882.16              | 535.92              | 0.151                            | 768.56              | 116.00              |
| A_68_P29292940 | chr13:105653878-105653922                         | NM_029984:73        | Fam159b    | INSIDE                 | 0.201                                           | 0.551                            | 1329.81             | 732.42              | 0.111                            | 1074.31             | 119.08              |
| A_68_P29702362 | chr14:70999309-70999353                           | NM_194345:312       | Fam160b2   | INSIDE                 | 0.525                                           | 0.359                            | 1598.94             | 574.24              | 0.188                            | 1237.15             | 233.10              |
| A_68_P30673613 | chr16:36071461-36071505                           | NM_027342:119       | Fam162a    | INSIDE                 | 0.122                                           | 0.572                            | 3357.25             | 1921.90             | 0.070                            | 2572.09             | 179.47              |
| A_68_P25369176 | chr7:107855309-107855353                          | NM_178764:115       | Fam168a    | INSIDE                 | 0.485                                           | 0.525                            | 1320.02             | 693.27              | 0.255                            | 1090.90             | 278.11              |
| A_68_P29249242 | chr13:97842053-97842097                           | NM_001100458:477    | Fam169a    | INSIDE                 | 0.262                                           | 1.449                            | 7529.40             | 10913.83            | 0.380                            | 4994.78             | 1897.35             |
| A_68_P29249243 | chr13:97842140-97842199                           | NM_001100458:572    | Fam169a    | INSIDE                 | 0.044                                           | 1.885                            | 2079.58             | 3920.02             | 0.084                            | 1622.84             | 135.71              |
| A_68_P28079561 | chr11:102299305-102299349                         | NM_199200:9651      | Fam171a2   | INSIDE                 | 0.388                                           | 0.678                            | 1299.25             | 880.31              | 0.263                            | 929.75              | 244.30              |
| A_68_P28079628 | chr11:102308536-102308580                         | NM_199200:419       | Fam171a2   | INSIDE                 | 0.270                                           | 0.556                            | 4410.99             | 2451.56             | 0.150                            | 3202.38             | 479.82              |
| A_68_P29160014 | chr13:77847868-77847912                           | NM_001163419:-60    | Fam172a    | PROMOTER               | 0.135                                           | 0.727                            | 2969.61             | 2157.54             | 0.098                            | 2344.87             | 230.17              |
| A_68_P29161996 | chr13:78302959-78303003                           | NM_001163419:455030 | Fam172a    | INSIDE                 | 0.523                                           | 0.708                            | 1326.64             | 938.85              | 0.370                            | 1070.86             | 396.19              |
| A_68_P31106284 | chr17:25929403-25929447                           | NM_145410:-195      | Fam173a    | PROMOTER               | 0.654                                           | 0.688                            | 1331.38             | 916.06              | 0.450                            | 1013.23             | 456.00              |
| A_68_P24586428 | chr6:81991724-81991768                            | NM_145570:125       | Fam176a    | INSIDE                 | 0.637                                           | 0.633                            | 1449.43             | 917.63              | 0.403                            | 1219.75             | 491.76              |
| A_68_P24586430 | chr6:81991869-81991913                            | NM_145570:269       | Fam176a    | INSIDE                 | 0.430                                           | 0.583                            | 1250.34             | 729.02              | 0.251                            | 1000.94             | 251.16              |

| ProbeName      | Target position of probe on CpG island microarray | TargetID          | GeneSymbol | CpG island Description | Ratio of relative methylation (TiO2-NP/Vehicle) | Sham group                       |                     |                     | TiO <sub>2</sub> -H group        |                     |                     |
|----------------|---------------------------------------------------|-------------------|------------|------------------------|-------------------------------------------------|----------------------------------|---------------------|---------------------|----------------------------------|---------------------|---------------------|
|                |                                                   |                   |            |                        |                                                 | Relative methylation (Cy-5/Cy-3) | Cy-3 signal (Input) | Cy-5 signal (MeDIP) | Relative methylation (Cy-5/Cy-3) | Cy-3 signal (Input) | Cy-5 signal (MeDIP) |
| A_68_P24586431 | chr6:81991939-81991986                            | NM_145570:341     | Fam176a    | INSIDE                 | 0.121                                           | 0.510                            | 2562.49             | 1307.44             | 0.062                            | 1949.39             | 120.16              |
| A_68_P32135376 | chr19:45005642-45005686                           | NM_001081225:56   | Fam178a    | INSIDE                 | 0.151                                           | 0.690                            | 1515.64             | 1046.26             | 0.104                            | 1121.45             | 116.78              |
| A_68_P32135377 | chr19:45005799-45005843                           | NM_001081225:212  | Fam178a    | INSIDE                 | 0.609                                           | 0.559                            | 2677.66             | 1495.88             | 0.340                            | 2182.19             | 741.87              |
| A_68_P32135378 | chr19:45005914-45005958                           | NM_001081225:328  | Fam178a    | INSIDE                 | 0.162                                           | 1.620                            | 2180.75             | 3532.95             | 0.262                            | 1585.12             | 415.47              |
| A_68_P32135379 | chr19:45006013-45006057                           | NM_001081225:426  | Fam178a    | INSIDE                 | 0.583                                           | 0.712                            | 1613.59             | 1149.54             | 0.415                            | 1325.25             | 550.36              |
| A_68_P32135375 | chr19:45005538-45005582                           | NM_001081225:48   | Fam178a    | PROMOTER               | 0.667                                           | 0.425                            | 1610.73             | 685.16              | 0.284                            | 1193.66             | 338.90              |
| A_68_P28493246 | chr12:66067167-66067211                           | NM_177805:460     | Fam179b    | INSIDE                 | 0.528                                           | 0.648                            | 1451.03             | 940.29              | 0.342                            | 1111.93             | 380.15              |
| A_68_P28493248 | chr12:66067408-66067452                           | NM_177805:702     | Fam179b    | INSIDE                 | 0.119                                           | 0.562                            | 2658.49             | 1493.43             | 0.067                            | 1807.59             | 120.61              |
| A_68_P28493249 | chr12:66067546-66067594                           | NM_177805:842     | Fam179b    | INSIDE                 | 0.172                                           | 0.632                            | 1670.05             | 1055.36             | 0.109                            | 1100.07             | 119.66              |
| A_68_P25328172 | chr7:100228249-100228299                          | NM_021427:-114    | Fam181b    | PROMOTER               | 0.228                                           | 0.622                            | 1141.45             | 709.95              | 0.142                            | 869.60              | 123.51              |
| A_68_P25328181 | chr7:100229343-100229387                          | NM_021427:976     | Fam181b    | INSIDE                 | 0.061                                           | 0.716                            | 4535.13             | 3247.78             | 0.044                            | 3244.95             | 142.88              |
| A_68_P21010978 | chr2:12340776-12340820                            | NM_024185:289     | Fam188a    | INSIDE                 | 0.553                                           | 0.697                            | 1174.00             | 817.77              | 0.385                            | 958.38              | 369.45              |
| A_68_P25181446 | chr7:72301608-72301652                            | NM_183087:-216    | Fam189a1   | PROMOTER               | 0.580                                           | 0.633                            | 1533.31             | 971.24              | 0.368                            | 1321.13             | 485.66              |
| A_68_P25181447 | chr7:72301734-72301778                            | NM_183087:-342    | Fam189a1   | PROMOTER               | 0.080                                           | 0.622                            | 4566.13             | 2839.35             | 0.050                            | 3019.94             | 150.74              |
| A_68_P31106871 | chr17:26005229-26005273                           | NM_026633:433     | Fam195a    | INSIDE                 | 0.234                                           | 0.400                            | 2342.18             | 936.32              | 0.094                            | 1823.49             | 170.70              |
| A_68_P25549532 | chr7:142129376-142129420                          | NM_001143802:715  | Fam196a    | INSIDE                 | 0.215                                           | 0.438                            | 1618.87             | 708.29              | 0.094                            | 1238.96             | 116.41              |
| A_68_P32683850 | chrX:133583924-133583968                          | NM_146261:-186    | Fam199x    | PROMOTER               | 0.108                                           | 1.697                            | 1612.97             | 2736.65             | 0.183                            | 817.88              | 149.56              |
| A_68_P22392957 | chr3:104561384-104561428                          | NM_183224:19059   | Fam19a3    | DOWNSTREAM             | 0.281                                           | 0.477                            | 1131.90             | 540.11              | 0.134                            | 907.71              | 121.49              |
| A_68_P22392958 | chr3:104561530-104561574                          | NM_183224:18913   | Fam19a3    | DOWNSTREAM             | 0.177                                           | 0.617                            | 1349.72             | 833.05              | 0.109                            | 1104.18             | 120.34              |
| A_68_P30347858 | chr15:76199296-76199340                           | NM_021555:-9      | Fam203a    | PROMOTER               | 0.290                                           | 0.590                            | 980.36              | 578.65              | 0.171                            | 721.73              | 123.65              |
| A_68_P30347865 | chr15:76200037-76200087                           | NM_021555:735     | Fam203a    | INSIDE                 | 0.147                                           | 1.388                            | 1576.99             | 2189.31             | 0.203                            | 1228.77             | 250.05              |
| A_68_P28120310 | chr11:109583554-109583598                         | NM_153782:-6      | Fam20a     | PROMOTER               | 0.623                                           | 0.464                            | 1323.81             | 613.60              | 0.289                            | 1025.51             | 303.71              |
| A_68_P28120311 | chr11:109583661-109583705                         | NM_153782:-112    | Fam20a     | PROMOTER               | 0.453                                           | 0.419                            | 1787.46             | 748.26              | 0.190                            | 1397.89             | 265.27              |
| A_68_P28120302 | chr11:109582605-109582649                         | NM_153782:944     | Fam20a     | INSIDE                 | 0.668                                           | 0.580                            | 1847.27             | 1072.02             | 0.388                            | 1591.69             | 616.80              |
| A_68_P24131499 | chr5:139230499-139230543                          | NM_030565:-514    | Fam20c     | PROMOTER               | 0.567                                           | 0.679                            | 1326.13             | 900.41              | 0.385                            | 1196.45             | 460.94              |
| A_68_P24131511 | chr5:139231842-139231886                          | NM_030565:830     | Fam20c     | INSIDE                 | 0.250                                           | 0.417                            | 1683.12             | 702.67              | 0.104                            | 1268.17             | 132.25              |
| A_68_P25960243 | chr8:74743668-74743712                            | NM_026455:62      | Fam32a     | INSIDE                 | 0.447                                           | 0.668                            | 1673.26             | 1117.32             | 0.299                            | 1291.04             | 385.48              |
| A_68_P20863273 | chr1:180248534-180248578                          | NM_025511:-727    | Fam36a     | PROMOTER               | 0.209                                           | 0.411                            | 3704.05             | 1521.18             | 0.086                            | 2683.04             | 230.25              |
| A_68_P31769416 | chr18:63546211-63546255                           | NM_001039485:605  | Fam38b     | INSIDE                 | 0.653                                           | 0.626                            | 1508.79             | 945.19              | 0.409                            | 1172.54             | 479.91              |
| A_68_P24290978 | chr6:22305712-22305756                            | NM_138587:347     | Fam3c      | INSIDE                 | 0.344                                           | 0.380                            | 2552.66             | 970.80              | 0.131                            | 2087.58             | 273.19              |
| A_68_P22407674 | chr3:107434065-107434109                          | NM_153563:542     | Fam40a     | INSIDE                 | 0.111                                           | 1.436                            | 1752.13             | 2516.68             | 0.159                            | 1311.00             | 208.60              |
| A_68_P22407676 | chr3:107434272-107434316                          | NM_153563:334     | Fam40a     | INSIDE                 | 0.457                                           | 0.655                            | 836.35              | 548.10              | 0.299                            | 731.28              | 218.93              |
| A_68_P30642670 | chr16:30599886-30599930                           | NM_177632:100     | Fam43a     | INSIDE                 | 0.473                                           | 0.614                            | 2985.20             | 1833.32             | 0.291                            | 2009.95             | 584.06              |
| A_68_P30642673 | chr16:30600225-30600275                           | NM_177632:442     | Fam43a     | INSIDE                 | 0.471                                           | 0.502                            | 1239.68             | 621.77              | 0.236                            | 1011.07             | 239.09              |
| A_68_P32227328 | chr19:60887531-60887575                           | NM_001167829:80   | Fam45a     | INSIDE                 | 0.441                                           | 0.501                            | 1986.74             | 995.16              | 0.221                            | 1578.45             | 348.66              |
| A_68_P32227330 | chr19:60887752-60887797                           | NM_001167829:302  | Fam45a     | INSIDE                 | 0.573                                           | 0.602                            | 870.95              | 524.64              | 0.345                            | 770.61              | 266.04              |
| A_68_P26693192 | chr9:85220596-85220642                            | NM_001160378:113  | Fam46a     | INSIDE                 | 0.278                                           | 0.560                            | 1460.86             | 818.73              | 0.156                            | 1225.83             | 191.20              |
| A_68_P26693197 | chr9:85221191-85221249                            | NM_001160379:463  | Fam46a     | PROMOTER               | 0.272                                           | 0.409                            | 1273.95             | 521.15              | 0.111                            | 1062.68             | 118.15              |
| A_68_P23317810 | chr4:133035888-133035933                          | NM_175307:-137    | Fam46b     | PROMOTER               | 0.349                                           | 0.567                            | 1302.78             | 738.54              | 0.198                            | 1004.61             | 198.83              |
| A_68_P23317815 | chr4:133036401-133036445                          | NM_175307:375     | Fam46b     | INSIDE                 | 0.526                                           | 0.695                            | 1689.50             | 1174.35             | 0.366                            | 1246.47             | 455.87              |
| A_68_P22369560 | chr3:100293076-100293120                          | NM_001142952:17   | Fam46c     | INSIDE                 | 0.428                                           | 0.481                            | 4172.15             | 2006.74             | 0.206                            | 3200.67             | 659.17              |
| A_68_P22369562 | chr3:100293420-100293464                          | NM_001142952:-327 | Fam46c     | PROMOTER               | 0.292                                           | 0.710                            | 1428.78             | 1014.97             | 0.207                            | 1178.39             | 244.24              |
| A_68_P22149159 | chr3:54496467-54496512                            | NM_019995:-537    | Fam48a     | PROMOTER               | 0.247                                           | 0.598                            | 930.57              | 556.52              | 0.148                            | 797.22              | 117.81              |
| A_68_P22149161 | chr3:54496698-54496742                            | NM_019995:-306    | Fam48a     | PROMOTER               | 0.274                                           | 0.725                            | 1682.31             | 1220.29             | 0.199                            | 1260.47             | 250.22              |

| ProbeName      | Target position of probe on CpG island microarray | TargetID          | GeneSymbol | CpG island Description | Ratio of relative methylation (TiO2-NP/Vehicle) | Sham group                       |                     |                     | TiO <sub>2</sub> -H group        |                     |                     |
|----------------|---------------------------------------------------|-------------------|------------|------------------------|-------------------------------------------------|----------------------------------|---------------------|---------------------|----------------------------------|---------------------|---------------------|
|                |                                                   |                   |            |                        |                                                 | Relative methylation (Cy-5/Cy-3) | Cy-3 signal (Input) | Cy-5 signal (MeDIP) | Relative methylation (Cy-5/Cy-3) | Cy-3 signal (Input) | Cy-5 signal (MeDIP) |
| A_68_P28242247 | chr12:12269223-12269267                           | NM_001146119:300  | Fam49a     | INSIDE                 | 0.183                                           | 0.696                            | 1504.27             | 1046.98             | 0.128                            | 1023.11             | 130.56              |
| A_68_P30279146 | chr15:63891463-63891507                           | NM_144846:526     | Fam49b     | INSIDE                 | 0.200                                           | 0.702                            | 1470.92             | 1032.91             | 0.141                            | 1240.59             | 174.59              |
| A_68_P32467455 | chrX:71558602-71558649                            | NM_138607:254     | Fam50a     | INSIDE                 | 0.140                                           | 1.791                            | 1017.43             | 1822.19             | 0.251                            | 474.27              | 118.97              |
| A_68_P23590168 | chr5:33972239-33972283                            | NM_178390:24      | Fam53a     | INSIDE                 | 0.346                                           | 0.261                            | 2591.49             | 675.40              | 0.090                            | 1961.12             | 176.96              |
| A_68_P25537048 | chr7:140004752-140004796                          | NM_212473:105     | Fam53b     | INSIDE                 | 0.422                                           | 0.395                            | 1663.24             | 656.80              | 0.167                            | 1453.98             | 242.25              |
| A_68_P26986431 | chr10:20067872-20067916                           | NM_027930:270     | Fam54a     | INSIDE                 | 0.295                                           | 0.482                            | 1155.15             | 557.13              | 0.142                            | 860.19              | 122.49              |
| A_68_P23323333 | chr4:134090414-134090464                          | NM_029759:-1771   | Fam54b     | PROMOTER               | 0.218                                           | 0.419                            | 1983.79             | 832.15              | 0.092                            | 1316.62             | 120.50              |
| A_68_P31544264 | chr18:21458028-21458072                           | NM_001033445:590  | Fam59a     | INSIDE                 | 0.194                                           | 0.374                            | 2023.66             | 756.91              | 0.073                            | 1645.96             | 119.50              |
| A_68_P31544266 | chr18:21458217-21458261                           | NM_001033445:402  | Fam59a     | INSIDE                 | 0.206                                           | 0.338                            | 2077.35             | 702.95              | 0.070                            | 1666.76             | 116.30              |
| A_68_P31544272 | chr18:21459015-21459059                           | NM_001033445:-396 | Fam59a     | PROMOTER               | 0.303                                           | 0.644                            | 2589.20             | 1668.63             | 0.195                            | 2037.40             | 398.16              |
| A_68_P23570722 | chr5:30431999-30432043                            | NM_001167879:285  | Fam59b     | INSIDE                 | 0.376                                           | 0.492                            | 1931.89             | 950.09              | 0.185                            | 1357.36             | 250.70              |
| A_68_P24942889 | chr6:148893354-148893400                          | NM_019643:1578    | Fam60a     | INSIDE                 | 0.570                                           | 0.544                            | 1192.04             | 648.66              | 0.310                            | 907.54              | 281.66              |
| A_68_P22343254 | chr3:95087394-95087438                            | NM_133858:560     | Fam63a     | INSIDE                 | 0.554                                           | 0.511                            | 1412.47             | 721.45              | 0.283                            | 1056.22             | 298.82              |
| A_68_P26134825 | chr8:108129199-108129243                          | NM_001081241:92   | Fam65a     | INSIDE                 | 0.504                                           | 0.463                            | 4343.91             | 2010.93             | 0.233                            | 3434.23             | 801.16              |
| A_68_P28888196 | chr13:24730767-24730811                           | NM_001080381:272  | Fam65b     | INSIDE                 | 0.150                                           | 0.540                            | 1737.10             | 937.18              | 0.081                            | 1443.13             | 117.13              |
| A_68_P31890268 | chr18:84889452-84889496                           | NM_173770:-159    | Fam69c     | PROMOTER               | 0.365                                           | 0.519                            | 1894.09             | 983.56              | 0.190                            | 1558.48             | 295.66              |
| A_68_P25087743 | chr7:51752229-51752273                            | NM_028169:293     | Fam71e1    | INSIDE                 | 0.084                                           | 0.619                            | 4174.24             | 2584.28             | 0.052                            | 2598.44             | 135.66              |
| A_68_P20616256 | chr1:133424915-133424959                          | NM_175382:371     | Fam72a     | INSIDE                 | 0.394                                           | 0.598                            | 939.33              | 561.70              | 0.235                            | 773.66              | 182.08              |
| A_68_P21113205 | chr2:31938737-31938781                            | NM_175511:467     | Fam78a     | INSIDE                 | 0.327                                           | 0.594                            | 2244.07             | 1333.68             | 0.194                            | 1629.12             | 316.59              |
| A_68_P21113207 | chr2:31938899-31938943                            | NM_175511:305     | Fam78a     | INSIDE                 | 0.527                                           | 0.442                            | 3151.64             | 1393.05             | 0.233                            | 2489.87             | 579.90              |
| A_68_P21113214 | chr2:31939681-31939725                            | NM_175511:-477    | Fam78a     | PROMOTER               | 0.622                                           | 0.593                            | 1617.40             | 959.38              | 0.369                            | 1278.06             | 471.64              |
| A_68_P20802626 | chr1:168930754-168930798                          | NM_001160261:-771 | Fam78b     | DIVERGENT_PROMOTER     | 0.409                                           | 0.544                            | 4120.83             | 2241.58             | 0.223                            | 3702.58             | 824.57              |
| A_68_P20802627 | chr1:168930921-168930965                          | NM_001160261:-605 | Fam78b     | DIVERGENT_PROMOTER     | 0.256                                           | 0.491                            | 1108.28             | 544.22              | 0.126                            | 962.92              | 121.06              |
| A_68_P21784859 | chr2:158593842-158593886                          | NM_027975:30      | Fam83d     | INSIDE                 | 0.319                                           | 0.389                            | 2629.73             | 1022.84             | 0.124                            | 2015.92             | 250.46              |
| A_68_P21784861 | chr2:158594102-158594146                          | NM_027975:290     | Fam83d     | INSIDE                 | 0.224                                           | 0.294                            | 3051.25             | 896.00              | 0.066                            | 2377.29             | 156.69              |
| A_68_P30373739 | chr15:80502384-80502428                           | NM_145986:130     | Fam83f     | INSIDE                 | 0.434                                           | 0.643                            | 1311.34             | 843.82              | 0.279                            | 1111.32             | 310.20              |
| A_68_P27849840 | chr11:61498639-61498683                           | NM_178618:749     | Fam83g     | INSIDE                 | 0.279                                           | 1.794                            | 902.48              | 1619.19             | 0.500                            | 636.82              | 318.52              |
| A_68_P28252857 | chr12:14158564-14158621                           | NM_029007:252     | Fam84a     | INSIDE                 | 0.359                                           | 0.700                            | 1266.96             | 887.11              | 0.252                            | 789.74              | 198.64              |
| A_68_P30261327 | chr15:60655565-60655617                           | NM_001162926:1045 | Fam84b     | INSIDE                 | 0.283                                           | 0.608                            | 919.35              | 558.71              | 0.172                            | 699.74              | 120.36              |
| A_68_P30261328 | chr15:60655675-60655719                           | NM_001162926:939  | Fam84b     | INSIDE                 | 0.251                                           | 0.662                            | 860.65              | 569.47              | 0.166                            | 705.49              | 117.12              |
| A_68_P30261333 | chr15:60656265-60656309                           | NM_001162926:349  | Fam84b     | INSIDE                 | 0.393                                           | 0.655                            | 1042.70             | 683.29              | 0.258                            | 911.55              | 234.94              |
| A_68_P30261335 | chr15:60656490-60656535                           | NM_001162926:123  | Fam84b     | INSIDE                 | 0.334                                           | 0.514                            | 1333.29             | 684.70              | 0.171                            | 964.41              | 165.17              |
| A_68_P26129630 | chr8:107165289-107165337                          | NM_026753:316     | Fam96b     | INSIDE                 | 0.084                                           | 1.360                            | 1467.13             | 1995.89             | 0.114                            | 1021.51             | 116.42              |
| A_68_P26129635 | chr8:107165709-107165753                          | NM_026753:-102    | Fam96b     | PROMOTER               | 0.127                                           | 0.686                            | 1791.31             | 1228.27             | 0.087                            | 1378.49             | 119.71              |
| A_68_P26129637 | chr8:107165970-107166027                          | NM_026753:-370    | Fam96b     | PROMOTER               | 0.259                                           | 0.606                            | 935.90              | 567.32              | 0.157                            | 739.15              | 115.93              |
| A_68_P31357838 | chr17:75951190-75951234                           | NM_133747:74      | Fam98a     | INSIDE                 | 0.162                                           | 0.671                            | 1504.50             | 1009.87             | 0.109                            | 1106.13             | 120.44              |
| A_68_P25025637 | chr7:29940517-29940567                            | NM_001146023:687  | Fam98c     | INSIDE                 | 0.181                                           | 0.556                            | 1451.94             | 807.71              | 0.101                            | 1163.45             | 117.14              |
| A_68_P25025638 | chr7:29940590-29940634                            | NM_001146023:617  | Fam98c     | INSIDE                 | 0.517                                           | 0.684                            | 3093.74             | 2114.94             | 0.353                            | 2326.73             | 822.15              |
| A_68_P31121749 | chr17:28450313-28450357                           | NM_001163819:-140 | Fance      | PROMOTER               | 0.347                                           | 0.718                            | 1420.58             | 1019.99             | 0.249                            | 985.33              | 245.38              |
| A_68_P31121750 | chr17:28450482-28450526                           | NM_001163819:30   | Fance      | INSIDE                 | 0.327                                           | 0.719                            | 1777.05             | 1277.97             | 0.235                            | 1349.73             | 317.35              |
| A_68_P25125430 | chr7:59116936-59116980                            | NM_001115087:679  | Fancef     | INSIDE                 | 0.197                                           | 0.438                            | 2024.92             | 887.03              | 0.086                            | 1566.38             | 135.31              |
| A_68_P25125435 | chr7:59117580-59117624                            | NM_001115087:35   | Fancef     | INSIDE                 | 0.387                                           | 0.389                            | 1514.68             | 589.37              | 0.151                            | 1241.29             | 186.88              |
| A_68_P25260792 | chr7:86537034-86537078                            | NM_145946:-167    | Fanci      | DIVERGENT_PROMOTER     | 0.119                                           | 0.577                            | 3528.27             | 2035.24             | 0.069                            | 2574.59             | 177.44              |
| A_68_P25260795 | chr7:86537392-86537436                            | NM_145946:191     | Fanci      | INSIDE                 | 0.102                                           | 0.594                            | 2596.27             | 1541.64             | 0.060                            | 1943.83             | 117.34              |

| ProbeName      | Target position of probe on CpG island microarray | TargetID            | GeneSymbol | CpG island Description | Ratio of relative methylation (TiO2-NP/Vehicle) | Sham group                       |                     |                     | TiO <sub>2</sub> -H group        |                     |                     |
|----------------|---------------------------------------------------|---------------------|------------|------------------------|-------------------------------------------------|----------------------------------|---------------------|---------------------|----------------------------------|---------------------|---------------------|
|                |                                                   |                     |            |                        |                                                 | Relative methylation (Cy-5/Cy-3) | Cy-3 signal (Input) | Cy-5 signal (MeDIP) | Relative methylation (Cy-5/Cy-3) | Cy-3 signal (Input) | Cy-5 signal (MeDIP) |
| A_68_P27662609 | chr11:26287534-26287589                           | NM_025923:478       | Fanc1      | INSIDE                 | 0.248                                           | 0.539                            | 1119.39             | 603.35              | 0.134                            | 880.25              | 117.62              |
| A_68_P28493835 | chr12:66176402-66176461                           | NM_178912:-161      | Fancm      | DIVERGENT_PROMOTER     | 0.489                                           | 0.558                            | 1182.85             | 659.90              | 0.273                            | 861.92              | 235.30              |
| A_68_P28493836 | chr12:66176491-66176538                           | NM_178912:-78       | Fancm      | DIVERGENT_PROMOTER     | 0.278                                           | 0.443                            | 1198.26             | 530.99              | 0.123                            | 978.67              | 120.62              |
| A_68_P25430847 | chr7:120657214-120657258                          | NM_026143:-139      | Far1       | PROMOTER               | 0.165                                           | 1.424                            | 2227.29             | 3170.93             | 0.235                            | 1609.66             | 377.51              |
| A_68_P20456054 | chr1:95408480-95408524                            | NM_145519:-178      | Farp2      | PROMOTER               | 0.480                                           | 0.465                            | 1324.72             | 616.09              | 0.223                            | 1060.35             | 236.71              |
| A_68_P28947128 | chr13:36209814-36209858                           | NM_001039189:557    | Fars2      | INSIDE                 | 0.266                                           | 0.634                            | 945.14              | 599.59              | 0.169                            | 815.97              | 137.83              |
| A_68_P28187037 | chr1:120686073-120686117                          | NM_007988:-233      | Fasn       | PROMOTER               | 0.659                                           | 0.547                            | 2938.89             | 1607.96             | 0.361                            | 2277.31             | 820.98              |
| A_68_P23541889 | chr5:23950730-23950774                            | NM_023229:301       | Fastk      | INSIDE                 | 0.530                                           | 0.581                            | 1987.04             | 1153.56             | 0.308                            | 1611.98             | 495.89              |
| A_68_P29110676 | chr13:68721046-68721090                           | NM_027123:-56       | Fastkd3    | DIVERGENT_PROMOTER     | 0.625                                           | 0.626                            | 2254.47             | 1411.85             | 0.391                            | 1937.62             | 758.54              |
| A_68_P25827401 | chr8:46036029-46036073                            | NM_001081286:489    | Fat1       | INSIDE                 | 0.665                                           | 2.649                            | 1533.08             | 4060.58             | 1.763                            | 1253.18             | 2208.91             |
| A_68_P25828056 | chr8:46122297-46122344                            | NM_001081286:86759  | Fat1       | INSIDE                 | 0.268                                           | 1.687                            | 641.92              | 1082.79             | 0.453                            | 567.83              | 257.12              |
| A_68_P25828172 | chr8:46136729-46136773                            | NM_001081286:101189 | Fat1       | INSIDE                 | 0.638                                           | 2.472                            | 3628.42             | 8967.89             | 1.576                            | 2402.99             | 3787.61             |
| A_68_P25828173 | chr8:46136798-46136846                            | NM_001081286:101261 | Fat1       | INSIDE                 | 0.567                                           | 2.570                            | 2112.83             | 5429.90             | 1.457                            | 1471.99             | 2144.67             |
| A_68_P22071595 | chr3:38784639-38784683                            | NM_183221:-1201     | Fat4       | PROMOTER               | 0.311                                           | 0.651                            | 2694.91             | 1753.61             | 0.202                            | 1968.38             | 398.25              |
| A_68_P22071613 | chr3:38786725-38786769                            | NM_183221:885       | Fat4       | INSIDE                 | 0.458                                           | 0.447                            | 1492.68             | 666.98              | 0.205                            | 1218.04             | 249.52              |
| A_68_P22071616 | chr3:38786996-38787040                            | NM_183221:1157      | Fat4       | INSIDE                 | 0.568                                           | 0.666                            | 1415.98             | 943.31              | 0.378                            | 1074.47             | 406.55              |
| A_68_P22071617 | chr3:38787100-38787144                            | NM_183221:1261      | Fat4       | INSIDE                 | 0.529                                           | 0.639                            | 1698.34             | 1084.82             | 0.338                            | 1263.31             | 426.53              |
| A_68_P22071618 | chr3:38787168-38787212                            | NM_183221:1329      | Fat4       | INSIDE                 | 0.205                                           | 0.479                            | 1581.88             | 758.06              | 0.098                            | 1187.12             | 116.78              |
| A_68_P28157764 | chr11:116029125-116029181                         | NM_172571:340       | Fbfl       | INSIDE                 | 0.248                                           | 0.665                            | 897.83              | 597.17              | 0.165                            | 722.58              | 119.30              |
| A_68_P28157765 | chr11:116029229-116029273                         | NM_172571:242       | Fbfl       | INSIDE                 | 0.363                                           | 0.488                            | 2357.68             | 1150.60             | 0.177                            | 1831.93             | 324.14              |
| A_68_P28687868 | chr12:103057400-103057444                         | NM_011812:-157      | Fbn5       | PROMOTER               | 0.250                                           | 0.451                            | 1263.91             | 570.60              | 0.113                            | 1050.30             | 118.38              |
| A_68_P21603035 | chr2:125331152-125331196                          | NM_007993:1000      | Fbn1       | INSIDE                 | 0.385                                           | 0.407                            | 1662.11             | 676.94              | 0.157                            | 1295.90             | 203.23              |
| A_68_P21603036 | chr2:125331219-125331263                          | NM_007993:934       | Fbn1       | INSIDE                 | 0.476                                           | 0.657                            | 935.55              | 614.36              | 0.313                            | 779.93              | 243.78              |
| A_68_P31741004 | chr18:58369796-58369845                           | NM_010181:-240      | Fbn2       | PROMOTER               | 0.401                                           | 0.672                            | 1429.00             | 960.85              | 0.270                            | 1189.50             | 320.74              |
| A_68_P23979395 | chr5:110815816-110815860                          | NM_028596:308       | Fbrs11     | INSIDE                 | 0.273                                           | 0.553                            | 1392.97             | 770.15              | 0.151                            | 1216.14             | 183.39              |
| A_68_P23979843 | chr5:110877476-110877520                          | NM_001142642:24     | Fbrs11     | INSIDE                 | 0.575                                           | 0.491                            | 1786.34             | 877.14              | 0.283                            | 1389.15             | 392.50              |
| A_68_P23979845 | chr5:110877631-110877675                          | NM_001142642:-130   | Fbrs11     | PROMOTER               | 0.560                                           | 0.631                            | 2505.81             | 1581.38             | 0.354                            | 1994.69             | 705.30              |
| A_68_P23979846 | chr5:110877794-110877838                          | NM_001142642:-294   | Fbrs11     | PROMOTER               | 0.331                                           | 0.624                            | 3872.09             | 2414.63             | 0.206                            | 2935.11             | 605.59              |
| A_68_P24793341 | chr6:119429106-119429150                          | NM_133940:-557      | Fbx114     | PROMOTER               | 0.471                                           | 1.354                            | 3221.50             | 4360.39             | 0.638                            | 2446.36             | 1561.18             |
| A_68_P24793349 | chr6:119430121-119430165                          | NM_133940:457       | Fbx114     | INSIDE                 | 0.500                                           | 0.443                            | 1249.63             | 553.10              | 0.221                            | 952.77              | 211.01              |
| A_68_P24793359 | chr6:119431189-119431233                          | NM_133940:1525      | Fbx114     | INSIDE                 | 0.197                                           | 0.616                            | 3279.68             | 2018.70             | 0.121                            | 2399.85             | 291.28              |
| A_68_P32143269 | chr19:46402678-46402722                           | NM_133694:27        | Fbx115     | INSIDE                 | 0.592                                           | 0.569                            | 950.84              | 541.30              | 0.337                            | 834.76              | 281.20              |
| A_68_P32143271 | chr19:46402975-46403019                           | NM_133694:323       | Fbx115     | INSIDE                 | 0.433                                           | 0.654                            | 1719.17             | 1123.56             | 0.283                            | 1417.27             | 400.83              |
| A_68_P32143272 | chr19:46403086-46403130                           | NM_133694:435       | Fbx115     | INSIDE                 | 0.349                                           | 0.408                            | 2457.72             | 1003.19             | 0.143                            | 1919.29             | 273.60              |
| A_68_P31106383 | chr17:25945693-25945737                           | NM_001164225:-315   | Fbx116     | PROMOTER               | 0.174                                           | 0.569                            | 1926.85             | 1096.78             | 0.099                            | 1409.88             | 139.80              |
| A_68_P31106388 | chr17:25946298-25946342                           | NM_001164225:291    | Fbx116     | INSIDE                 | 0.475                                           | 0.688                            | 1554.55             | 1069.98             | 0.327                            | 1248.05             | 407.99              |
| A_68_P25507025 | chr7:134889380-134889424                          | NM_172748:-886      | Fbx119     | PROMOTER               | 0.418                                           | 0.589                            | 3043.86             | 1792.94             | 0.246                            | 1889.60             | 465.46              |
| A_68_P25507036 | chr7:134890617-134890661                          | NM_172748:350       | Fbx119     | INSIDE                 | 0.545                                           | 0.577                            | 3130.41             | 1805.33             | 0.314                            | 2168.27             | 681.06              |
| A_68_P28054684 | chr11:98010545-98010589                           | NM_028149:364       | Fbx120     | INSIDE                 | 0.120                                           | 0.546                            | 3521.42             | 1921.09             | 0.066                            | 2742.18             | 180.13              |
| A_68_P28054685 | chr11:98010627-98010671                           | NM_028149:282       | Fbx120     | INSIDE                 | 0.167                                           | 0.494                            | 2679.41             | 1323.04             | 0.082                            | 2056.77             | 169.66              |
| A_68_P28054692 | chr11:98011319-98011364                           | NM_028149:-411      | Fbx120     | PROMOTER               | 0.120                                           | 0.423                            | 3374.31             | 1427.53             | 0.051                            | 2373.73             | 120.90              |
| A_68_P29061785 | chr13:56623742-56623786                           | NM_178674:-104      | Fbx121     | PROMOTER               | 0.219                                           | 0.471                            | 5436.07             | 2558.92             | 0.103                            | 4378.98             | 451.91              |
| A_68_P26593512 | chr9:66359862-66359906                            | NM_175206:2516      | Fbx122     | INSIDE                 | 0.366                                           | 0.675                            | 991.70              | 669.31              | 0.247                            | 868.51              | 214.47              |
| A_68_P30089764 | chr15:26824671-26824715                           | NM_176959:627       | Fbx17      | INSIDE                 | 0.324                                           | 0.629                            | 2508.25             | 1578.89             | 0.204                            | 1946.34             | 397.18              |

| ProbeName      | Target position of probe on CpG island microarray | TargetID          | GeneSymbol | CpG island Description | Ratio of relative methylation (TiO2-NP/Vehicle) | Sham group                       |                     |                     | TiO <sub>2</sub> -H group        |                     |                     |
|----------------|---------------------------------------------------|-------------------|------------|------------------------|-------------------------------------------------|----------------------------------|---------------------|---------------------|----------------------------------|---------------------|---------------------|
|                |                                                   |                   |            |                        |                                                 | Relative methylation (Cy-5/Cy-3) | Cy-3 signal (Input) | Cy-5 signal (MeDIP) | Relative methylation (Cy-5/Cy-3) | Cy-3 signal (Input) | Cy-5 signal (MeDIP) |
| A_68_P26132610 | chr8:107792581-107792625                          | NM_015821:4055    | Fbxl8      | INSIDE                 | 0.340                                           | 0.605                            | 1463.87             | 886.37              | 0.206                            | 1127.49             | 232.42              |
| A_68_P26132614 | chr8:107793016-107793064                          | NM_015821:4493    | Fbxl8      | INSIDE                 | 0.160                                           | 0.555                            | 2094.84             | 1162.85             | 0.089                            | 1370.76             | 121.96              |
| A_68_P25023220 | chr7:29501806-29501850                            | NM_015796:20      | Fbxo17     | INSIDE                 | 0.557                                           | 0.656                            | 1623.49             | 1064.23             | 0.365                            | 1443.82             | 527.31              |
| A_68_P25023288 | chr7:29517538-29517582                            | NM_015796:15752   | Fbxo17     | INSIDE                 | 0.510                                           | 0.588                            | 912.14              | 536.30              | 0.300                            | 817.40              | 245.08              |
| A_68_P25023289 | chr7:29517672-29517716                            | NM_015796:15886   | Fbxo17     | INSIDE                 | 0.542                                           | 0.613                            | 1326.90             | 813.96              | 0.332                            | 1094.32             | 363.66              |
| A_68_P21007903 | chr2:11698976-11699020                            | NM_015792:156     | Fbxo18     | INSIDE                 | 0.613                                           | 0.626                            | 3801.92             | 2380.95             | 0.384                            | 2789.82             | 1071.73             |
| A_68_P21007905 | chr2:11699155-11699199                            | NM_015792:-22     | Fbxo18     | DIVERGENT_PROMOTER     | 0.228                                           | 0.687                            | 6451.61             | 4434.24             | 0.157                            | 4539.72             | 711.85              |
| A_68_P23392754 | chr4:147534489-147534533                          | NM_176848:-266    | Fbxo2      | DIVERGENT_PROMOTER     | 0.244                                           | 0.459                            | 1456.48             | 667.93              | 0.112                            | 1069.47             | 119.76              |
| A_68_P26529950 | chr9:55057294-55057339                            | NM_028049:575     | Fbxo22     | INSIDE                 | 0.240                                           | 0.582                            | 1123.23             | 654.00              | 0.140                            | 848.96              | 118.67              |
| A_68_P21486778 | chr2:103867915-103867959                          | NM_020593:-19     | Fbxo3      | PROMOTER               | 0.509                                           | 0.500                            | 1250.65             | 625.27              | 0.254                            | 1039.88             | 264.62              |
| A_68_P21486780 | chr2:103868083-103868131                          | NM_020593:151     | Fbxo3      | INSIDE                 | 0.101                                           | 2.395                            | 699.92              | 1676.08             | 0.243                            | 495.55              | 120.36              |
| A_68_P28470864 | chr12:60320947-60320991                           | NM_001033156:-498 | Fbxo33     | PROMOTER               | 0.597                                           | 0.493                            | 1475.94             | 727.36              | 0.294                            | 1217.60             | 358.41              |
| A_68_P20405972 | chr1:84836507-84836554                            | NM_025386:115     | Fbxo36     | INSIDE                 | 0.207                                           | 0.611                            | 1513.41             | 924.52              | 0.126                            | 1158.18             | 146.33              |
| A_68_P31764313 | chr18:62708319-62708363                           | NM_134136:57      | Fbxo38     | INSIDE                 | 0.328                                           | 0.651                            | 1387.03             | 902.87              | 0.214                            | 988.00              | 211.00              |
| A_68_P30651586 | chr16:32246480-32246526                           | NM_173439:609     | Fbxo45     | INSIDE                 | 0.221                                           | 0.664                            | 938.83              | 623.10              | 0.147                            | 791.97              | 116.26              |
| A_68_P24991622 | chr7:19717039-19717083                            | NM_175530:11853   | Fbxo46     | INSIDE                 | 0.236                                           | 0.705                            | 1814.17             | 1279.23             | 0.167                            | 1475.60             | 245.86              |
| A_68_P26905371 | chr10:4541584-4541628                             | NM_025995:531     | Fbxo5      | INSIDE                 | 0.195                                           | 0.422                            | 1778.22             | 750.04              | 0.082                            | 1423.04             | 117.12              |
| A_68_P32920574 | chr13:50513406-50513450                           | NM_175401:183     | Fbxw17     | INSIDE                 | 0.291                                           | 0.407                            | 1725.21             | 703.01              | 0.119                            | 1387.43             | 164.75              |
| A_68_P32139835 | chr19:45734791-45734835                           | NM_013907:-129    | Fbxw4      | PROMOTER               | 0.594                                           | 0.573                            | 1068.08             | 612.45              | 0.341                            | 896.83              | 305.64              |
| A_68_P26023481 | chr8:87584180-87584224                            | NM_026791:185     | Fbxw9      | INSIDE                 | 0.396                                           | 0.627                            | 1561.81             | 978.68              | 0.248                            | 1215.89             | 301.53              |
| A_68_P22348573 | chr3:96081761-96081812                            | NM_010186:16106   | Fcgr1      | DOWNSTREAM             | 0.258                                           | 0.428                            | 1339.42             | 573.08              | 0.110                            | 1067.05             | 117.67              |
| A_68_P20825994 | chr1:172994223-172994267                          | NM_010188:-4710   | Fcgr3      | PROMOTER               | 0.444                                           | 3.466                            | 22821.82            | 79103.15            | 1.540                            | 15614.41            | 24042.33            |
| A_68_P20825998 | chr1:172994760-172994804                          | NM_010188:-5248   | Fcgr3      | PROMOTER               | 0.196                                           | 0.557                            | 6963.61             | 3879.52             | 0.109                            | 5761.66             | 629.67              |
| A_68_P20826007 | chr1:172995883-172995927                          | NM_010188:-6370   | Fcgr3      | PROMOTER               | 0.475                                           | 0.324                            | 7844.01             | 2538.94             | 0.154                            | 6645.24             | 1021.34             |
| A_68_P20826008 | chr1:172995959-172996003                          | NM_010188:-6446   | Fcgr3      | PROMOTER               | 0.406                                           | 0.350                            | 18198.05            | 6361.85             | 0.142                            | 15322.08            | 2176.74             |
| A_68_P29259682 | chr13:99585022-99585066                           | NM_172591:360     | Fcho2      | INSIDE                 | 0.100                                           | 0.530                            | 3021.18             | 1600.17             | 0.053                            | 2475.84             | 131.59              |
| A_68_P31631189 | chr18:38129379-38129423                           | NM_175684:-15     | Fchsd1     | PROMOTER               | 0.181                                           | 0.669                            | 2092.14             | 1398.67             | 0.121                            | 1673.93             | 202.19              |
| A_68_P25371474 | chr7:108256833-108256877                          | NM_001146010:-434 | Fchsd2     | PROMOTER               | 0.443                                           | 0.409                            | 1624.10             | 664.34              | 0.181                            | 1226.50             | 222.45              |
| A_68_P25371480 | chr7:108257652-108257696                          | NM_001146010:386  | Fchsd2     | INSIDE                 | 0.018                                           | 1.469                            | 6853.58             | 10064.94            | 0.026                            | 4417.02             | 116.42              |
| A_68_P20825266 | chr1:172837419-172837463                          | NM_001029984:5632 | Fer1b      | INSIDE                 | 0.381                                           | 1.347                            | 2671.36             | 3598.72             | 0.514                            | 2081.09             | 1068.86             |
| A_68_P20825279 | chr1:172838779-172838823                          | NM_001029984:4272 | Fer1b      | INSIDE                 | 0.171                                           | 0.650                            | 1961.31             | 1274.92             | 0.111                            | 1504.44             | 167.14              |
| A_68_P29659636 | chr14:63796998-63797042                           | NM_010191:-390    | Fdfl1      | PROMOTER               | 0.284                                           | 0.459                            | 1214.26             | 557.87              | 0.130                            | 912.10              | 118.93              |
| A_68_P22317214 | chr3:88905621-88905667                            | NM_134469:223     | Fdps       | INSIDE                 | 0.113                                           | 0.705                            | 2236.03             | 1576.61             | 0.080                            | 1667.48             | 133.43              |
| A_68_P31775663 | chr18:64648900-64648944                           | NM_007998:-202    | Fech       | PROMOTER               | 0.348                                           | 0.574                            | 2138.47             | 1228.40             | 0.200                            | 1545.21             | 308.52              |
| A_68_P31254845 | chr17:56395400-56395444                           | NM_010192:-793    | Fem1a      | PROMOTER               | 0.527                                           | 0.490                            | 1685.22             | 825.45              | 0.258                            | 1313.88             | 338.91              |
| A_68_P26572463 | chr9:62658873-62658917                            | NM_010193:561     | Fem1b      | INSIDE                 | 0.604                                           | 0.724                            | 2162.60             | 1565.76             | 0.437                            | 1624.45             | 710.21              |
| A_68_P26572470 | chr9:62659765-62659809                            | NM_010193:-331    | Fem1b      | PROMOTER               | 0.208                                           | 0.734                            | 3215.67             | 2361.11             | 0.153                            | 2271.39             | 347.13              |
| A_68_P31677411 | chr18:46685323-46685367                           | NM_173423:281     | Fem1c      | INSIDE                 | 0.492                                           | 0.694                            | 3789.43             | 2629.76             | 0.341                            | 2702.09             | 922.10              |
| A_68_P31677416 | chr18:46685866-46685910                           | NM_173423:-263    | Fem1c      | PROMOTER               | 0.236                                           | 0.603                            | 997.57              | 601.92              | 0.142                            | 856.38              | 121.70              |
| A_68_P20351018 | chr1:74928813-74928857                            | NM_153111:3148    | Fev        | INSIDE                 | 0.283                                           | 0.642                            | 3070.75             | 1970.84             | 0.181                            | 2408.62             | 436.84              |
| A_68_P20351043 | chr1:74931488-74931534                            | NM_153111:472     | Fev        | INSIDE                 | 0.169                                           | 0.476                            | 2040.17             | 971.48              | 0.080                            | 1514.48             | 121.80              |
| A_68_P20351044 | chr1:74931604-74931648                            | NM_153111:356     | Fev        | INSIDE                 | 0.365                                           | 0.652                            | 3328.55             | 2168.66             | 0.238                            | 2335.52             | 555.21              |
| A_68_P20351048 | chr1:74931966-74932010                            | NM_153111:-6      | Fev        | PROMOTER               | 0.427                                           | 0.656                            | 1876.17             | 1230.17             | 0.280                            | 1690.43             | 473.23              |
| A_68_P20351050 | chr1:74932235-74932279                            | NM_153111:-274    | Fev        | PROMOTER               | 0.173                                           | 2.211                            | 6752.79             | 14933.72            | 0.383                            | 4043.83             | 1549.35             |

| ProbeName      | Target position of probe on CpG island microarray | TargetID          | GeneSymbol | CpG island Description | Ratio of relative methylation (TiO2-NP/Vehicle) | Sham group                       |                     |                     | TiO <sub>2</sub> -H group        |                     |                     |
|----------------|---------------------------------------------------|-------------------|------------|------------------------|-------------------------------------------------|----------------------------------|---------------------|---------------------|----------------------------------|---------------------|---------------------|
|                |                                                   |                   |            |                        |                                                 | Relative methylation (Cy-5/Cy-3) | Cy-3 signal (Input) | Cy-5 signal (MeDIP) | Relative methylation (Cy-5/Cy-3) | Cy-3 signal (Input) | Cy-5 signal (MeDIP) |
| A_68_P24295385 | chr6:23197965-23198012                            | NM_028462:276     | Fezf1      | INSIDE                 | 0.097                                           | 0.674                            | 2733.93             | 1843.83             | 0.066                            | 1863.56             | 122.39              |
| A_68_P24295386 | chr6:23198116-23198160                            | NM_028462:126     | Fezf1      | INSIDE                 | 0.093                                           | 0.733                            | 3157.65             | 2316.08             | 0.069                            | 2097.79             | 143.85              |
| A_68_P24295435 | chr6:23204086-23204130                            | NM_028462:-5844   | Fezf1      | PROMOTER               | 0.600                                           | 0.695                            | 1354.26             | 940.63              | 0.417                            | 1081.26             | 450.87              |
| A_68_P29410629 | chr14:13173646-13173690                           | NM_080433:4711    | Fezf2      | DOWNSTREAM             | 0.543                                           | 0.462                            | 1147.86             | 529.98              | 0.250                            | 1052.13             | 263.56              |
| A_68_P29410630 | chr14:13173724-13173771                           | NM_080433:4632    | Fezf2      | DOWNSTREAM             | 0.453                                           | 0.655                            | 1059.17             | 693.65              | 0.296                            | 846.28              | 250.92              |
| A_68_P27357056 | chr10:93498664-93498716                           | NM_053072:-55     | Fgd6       | DIVERGENT_PROMOTER     | 0.295                                           | 0.553                            | 975.06              | 538.97              | 0.163                            | 744.85              | 121.32              |
| A_68_P27357059 | chr10:93498957-93499001                           | NM_053072:233     | Fgd6       | INSIDE                 | 0.267                                           | 0.491                            | 1250.55             | 613.55              | 0.131                            | 900.05              | 117.91              |
| A_68_P27357060 | chr10:93499035-93499079                           | NM_053072:311     | Fgd6       | INSIDE                 | 0.525                                           | 0.653                            | 1340.98             | 875.59              | 0.343                            | 1185.84             | 406.51              |
| A_68_P27897164 | chr11:69614462-69614506                           | NM_010198:643     | Fgf11      | INSIDE                 | 0.340                                           | 0.317                            | 2021.17             | 640.82              | 0.108                            | 1463.23             | 157.89              |
| A_68_P27897167 | chr11:69614867-69614911                           | NM_010198:239     | Fgf11      | INSIDE                 | 0.129                                           | 0.646                            | 2032.92             | 1312.96             | 0.083                            | 1410.84             | 117.31              |
| A_68_P27897170 | chr11:69615173-69615217                           | NM_010198:-67     | Fgf11      | PROMOTER               | 0.387                                           | 0.494                            | 1422.97             | 703.22              | 0.191                            | 1141.34             | 218.27              |
| A_68_P30630405 | chr16:28445397-28445447                           | NM_183064:-109    | Fgf12      | PROMOTER               | 0.132                                           | 0.604                            | 1991.04             | 1201.71             | 0.080                            | 1536.08             | 122.51              |
| A_68_P30630410 | chr16:28445868-28445912                           | NM_183064:-577    | Fgf12      | PROMOTER               | 0.510                                           | 0.707                            | 2576.61             | 1821.60             | 0.360                            | 1966.69             | 708.89              |
| A_68_P25609911 | chr7:152081721-152081765                          | NM_008003:-694    | Fgf15      | PROMOTER               | 0.442                                           | 0.444                            | 1253.54             | 556.52              | 0.196                            | 989.14              | 193.93              |
| A_68_P29702644 | chr14:71041729-71041773                           | NM_008004:325     | Fgf17      | INSIDE                 | 0.403                                           | 0.627                            | 2188.74             | 1371.28             | 0.252                            | 1859.32             | 469.04              |
| A_68_P24830594 | chr6:127030212-127030256                          | NM_022657:7315    | Fgf23      | INSIDE                 | 0.562                                           | 0.643                            | 796.56              | 512.55              | 0.362                            | 643.98              | 232.88              |
| A_68_P24830597 | chr6:127030465-127030509                          | NM_022657:7567    | Fgf23      | INSIDE                 | 0.545                                           | 0.659                            | 3245.69             | 2139.62             | 0.359                            | 2522.13             | 906.67              |
| A_68_P25609547 | chr7:152025243-152025287                          | NM_008007:748     | Fgf3       | INSIDE                 | 0.539                                           | 0.604                            | 1651.95             | 997.23              | 0.325                            | 1374.01             | 446.97              |
| A_68_P25609683 | chr7:152047109-152047153                          | NM_010202:-160    | Fgf4       | PROMOTER               | 0.342                                           | 0.530                            | 2799.23             | 1484.20             | 0.181                            | 2301.08             | 416.77              |
| A_68_P25609691 | chr7:152047946-152047990                          | NM_010202:678     | Fgf4       | INSIDE                 | 0.412                                           | 0.492                            | 1642.75             | 808.69              | 0.203                            | 1186.41             | 240.81              |
| A_68_P23917030 | chr5:98682994-98683038                            | NM_010203:-186    | Fgf5       | PROMOTER               | 0.395                                           | 0.553                            | 1859.16             | 1027.23             | 0.218                            | 1360.03             | 296.52              |
| A_68_P23917031 | chr5:98683201-98683245                            | NM_010203:20      | Fgf5       | INSIDE                 | 0.175                                           | 0.699                            | 1750.58             | 1224.45             | 0.122                            | 1265.06             | 154.45              |
| A_68_P23917033 | chr5:98683430-98683474                            | NM_010203:250     | Fgf5       | INSIDE                 | 0.327                                           | 0.615                            | 1605.45             | 987.03              | 0.201                            | 1412.65             | 283.62              |
| A_68_P32140185 | chr19:45811804-45811848                           | NM_001166361:5548 | Fgf8       | INSIDE                 | 0.378                                           | 0.518                            | 1130.07             | 584.84              | 0.196                            | 886.64              | 173.41              |
| A_68_P32140226 | chr19:45817015-45817059                           | NM_001166361:338  | Fgf8       | INSIDE                 | 0.480                                           | 0.537                            | 1065.37             | 572.62              | 0.258                            | 836.27              | 215.78              |
| A_68_P29631501 | chr14:58694549-58694593                           | NM_013518:3048    | Fgf9       | INSIDE                 | 0.478                                           | 0.378                            | 1966.29             | 743.61              | 0.181                            | 1526.29             | 276.13              |
| A_68_P29631506 | chr14:58695032-58695076                           | NM_013518:3532    | Fgf9       | INSIDE                 | 0.150                                           | 0.698                            | 2848.64             | 1988.57             | 0.105                            | 2150.26             | 225.35              |
| A_68_P29631507 | chr14:58695104-58695149                           | NM_013518:3604    | Fgf9       | INSIDE                 | 0.221                                           | 0.553                            | 1110.80             | 614.03              | 0.122                            | 940.82              | 114.94              |
| A_68_P25520717 | chr7:137409140-137409185                          | NM_010207:1160    | Fgfr2      | INSIDE                 | 0.083                                           | 1.362                            | 2061.58             | 2807.24             | 0.113                            | 1466.40             | 165.91              |
| A_68_P23590777 | chr5:34064147-34064191                            | NM_001163215:-204 | Fgfr3      | PROMOTER               | 0.354                                           | 0.542                            | 989.97              | 536.39              | 0.192                            | 732.60              | 140.47              |
| A_68_P23590781 | chr5:34064587-34064631                            | NM_001163216:-346 | Fgfr3      | PROMOTER               | 0.405                                           | 0.530                            | 3266.43             | 1729.91             | 0.215                            | 2438.35             | 523.55              |
| A_68_P23590782 | chr5:34064726-34064770                            | NM_001163216:-206 | Fgfr3      | PROMOTER               | 0.531                                           | 0.689                            | 1161.14             | 800.35              | 0.366                            | 854.02              | 312.68              |
| A_68_P29053524 | chr13:55254501-55254545                           | NM_008011:344     | Fgfr4      | INSIDE                 | 0.406                                           | 1.439                            | 1816.38             | 2614.22             | 0.584                            | 1466.89             | 857.10              |
| A_68_P23973608 | chr5:109123109-109123155                          | NM_001164259:-115 | Fgfr11     | PROMOTER               | 0.314                                           | 0.691                            | 5348.29             | 3695.93             | 0.217                            | 4106.77             | 890.10              |
| A_68_P23973612 | chr5:109123736-109123780                          | NM_001164259:511  | Fgfr11     | INSIDE                 | 0.255                                           | 0.415                            | 1763.84             | 732.32              | 0.106                            | 1305.41             | 138.36              |
| A_68_P20849152 | chr1:177555795-177555846                          | NM_010209:-54     | Fh1        | DIVERGENT_PROMOTER     | 0.066                                           | 1.365                            | 2170.50             | 2961.80             | 0.090                            | 1673.46             | 150.99              |
| A_68_P22291215 | chr3:84284164-84284208                            | NM_001205355:-773 | Fhdc1      | PROMOTER               | 0.387                                           | 0.475                            | 3144.88             | 1494.82             | 0.184                            | 2494.26             | 458.70              |
| A_68_P22291219 | chr3:84284726-84284770                            | NM_001033301:-387 | Fhdc1      | PROMOTER               | 0.666                                           | 0.447                            | 2105.73             | 940.81              | 0.297                            | 1601.10             | 476.27              |
| A_68_P32397420 | chrX:53985031-53985075                            | NM_001077361:-81  | Fh11       | PROMOTER               | 0.595                                           | 2.929                            | 2221.21             | 6506.14             | 1.743                            | 1013.79             | 1767.47             |
| A_68_P23269774 | chr4:124377782-124377826                          | NM_010213:-138    | Fh3        | DIVERGENT_PROMOTER     | 0.305                                           | 0.537                            | 3301.51             | 1771.42             | 0.163                            | 2410.10             | 393.97              |
| A_68_P23269775 | chr4:124377958-124378002                          | NM_010213:38      | Fh3        | INSIDE                 | 0.490                                           | 0.538                            | 2623.76             | 1410.84             | 0.263                            | 2064.18             | 543.47              |
| A_68_P26133209 | chr8:107871674-107871718                          | NM_177699:174     | Fhod1      | INSIDE                 | 0.195                                           | 0.514                            | 1692.58             | 869.66              | 0.100                            | 1245.76             | 125.01              |
| A_68_P31561531 | chr18:24868543-24868587                           | NM_175276:619     | Fhod3      | INSIDE                 | 0.149                                           | 0.620                            | 1660.31             | 1029.07             | 0.092                            | 1352.22             | 125.06              |
| A_68_P21111659 | chr2:31701359-31701403                            | NM_178887:145     | Fibcd1     | INSIDE                 | 0.503                                           | 0.479                            | 1794.74             | 859.85              | 0.241                            | 1531.96             | 369.25              |

| ProbeName      | Target position of probe on CpG island microarray | TargetID           | GeneSymbol | CpG island Description | Ratio of relative methylation (TiO2-NP/Vehicle) | Sham group                       |                     |                     | TiO <sub>2</sub> -H group        |                     |                     |
|----------------|---------------------------------------------------|--------------------|------------|------------------------|-------------------------------------------------|----------------------------------|---------------------|---------------------|----------------------------------|---------------------|---------------------|
|                |                                                   |                    |            |                        |                                                 | Relative methylation (Cy-5/Cy-3) | Cy-3 signal (Input) | Cy-5 signal (MeDIP) | Relative methylation (Cy-5/Cy-3) | Cy-3 signal (Input) | Cy-5 signal (MeDIP) |
| A_68_P21111665 | chr2:31702261-31702305                            | NM_178887:-757     | Fibcd1     | PROMOTER               | 0.515                                           | 0.479                            | 2368.72             | 1135.18             | 0.247                            | 1803.38             | 445.06              |
| A_68_P23999715 | chr5:114185534-114185578                          | NM_001010825:-234  | Ficd       | PROMOTER               | 0.327                                           | 0.464                            | 2132.62             | 988.98              | 0.152                            | 1495.81             | 226.98              |
| A_68_P23999718 | chr5:114185852-114185896                          | NM_001010825:84    | Ficd       | INSIDE                 | 0.641                                           | 0.455                            | 3096.15             | 1410.16             | 0.292                            | 2435.03             | 711.35              |
| A_68_P24607722 | chr6:85978843-85978887                            | NM_012013:11680    | Figla      | DOWNSTREAM             | 0.374                                           | 0.504                            | 1389.48             | 699.90              | 0.188                            | 1073.81             | 202.30              |
| A_68_P24607723 | chr6:85978919-85978963                            | NM_012013:11756    | Figla      | DOWNSTREAM             | 0.164                                           | 0.503                            | 1886.70             | 948.48              | 0.082                            | 1424.37             | 117.35              |
| A_68_P24607724 | chr6:85978997-85979041                            | NM_012013:11834    | Figla      | DOWNSTREAM             | 0.294                                           | 0.395                            | 1372.49             | 541.51              | 0.116                            | 1018.25             | 118.25              |
| A_68_P23803966 | chr5:74931407-74931451                            | NM_001159573:-78   | Fip1l1     | DIVERGENT_PROMOTER     | 0.362                                           | 0.678                            | 2028.43             | 1376.00             | 0.245                            | 1754.68             | 430.30              |
| A_68_P21477082 | chr2:102290453-102290497                          | NM_010218:1475     | Fjx1       | INSIDE                 | 0.135                                           | 1.859                            | 930.80              | 1730.25             | 0.250                            | 714.43              | 178.68              |
| A_68_P21477083 | chr2:102290541-102290585                          | NM_010218:1387     | Fjx1       | INSIDE                 | 0.345                                           | 0.690                            | 1870.10             | 1290.36             | 0.238                            | 1501.93             | 357.29              |
| A_68_P21477084 | chr2:102290645-102290692                          | NM_010218:1281     | Fjx1       | INSIDE                 | 0.422                                           | 0.535                            | 1716.13             | 917.66              | 0.226                            | 1340.04             | 302.63              |
| A_68_P22963965 | chr4:62021291-62021335                            | NM_001045528:270   | Fkbp15     | INSIDE                 | 0.209                                           | 0.417                            | 1761.10             | 734.52              | 0.087                            | 1367.87             | 119.46              |
| A_68_P25952440 | chr8:73051499-73051543                            | NM_001111066:-121  | Fkbp8      | DIVERGENT_PROMOTER     | 0.335                                           | 0.630                            | 1257.36             | 792.22              | 0.211                            | 901.38              | 189.99              |
| A_68_P22924772 | chr4:53727484-53727528                            | NM_139309:453      | Fktn       | INSIDE                 | 0.560                                           | 0.679                            | 1666.83             | 1132.53             | 0.381                            | 1370.51             | 521.66              |
| A_68_P27839121 | chr11:59623157-59623201                           | NM_146018:97       | Fln        | INSIDE                 | 0.665                                           | 0.491                            | 2653.43             | 1302.98             | 0.327                            | 1880.19             | 614.39              |
| A_68_P26406144 | chr9:32348552-32348596                            | NM_008026:379      | Fli1       | INSIDE                 | 0.549                                           | 0.569                            | 917.17              | 522.06              | 0.312                            | 752.94              | 235.12              |
| A_68_P26406146 | chr9:32348818-32348862                            | NM_008026:113      | Fli1       | INSIDE                 | 0.197                                           | 0.696                            | 4697.42             | 3267.47             | 0.137                            | 3409.21             | 468.18              |
| A_68_P26406181 | chr9:32353158-32353202                            | NM_008026:-4227    | Fli1       | PROMOTER               | 0.185                                           | 0.460                            | 1778.13             | 818.45              | 0.085                            | 1447.37             | 123.32              |
| A_68_P32467037 | chrX:71491458-71491502                            | NM_010227:393      | Flna       | INSIDE                 | 0.126                                           | 1.843                            | 3760.51             | 6930.66             | 0.232                            | 1298.04             | 301.57              |
| A_68_P32467038 | chrX:71491563-71491607                            | NM_010227:289      | Flna       | INSIDE                 | 0.152                                           | 1.538                            | 2086.99             | 3209.16             | 0.234                            | 721.94              | 168.92              |
| A_68_P32467039 | chrX:71491630-71491682                            | NM_010227:217      | Flna       | INSIDE                 | 0.103                                           | 1.642                            | 2153.63             | 3535.33             | 0.168                            | 716.93              | 120.63              |
| A_68_P29386050 | chr14:8650925-8650970                             | NM_134080:477      | Flnb       | INSIDE                 | 0.274                                           | 0.496                            | 1103.67             | 547.52              | 0.136                            | 868.91              | 117.93              |
| A_68_P29386051 | chr14:8651064-8651108                             | NM_134080:616      | Flnb       | INSIDE                 | 0.136                                           | 0.522                            | 2409.82             | 1257.60             | 0.071                            | 1705.76             | 121.46              |
| A_68_P29386052 | chr14:8651174-8651222                             | NM_134080:728      | Flnb       | INSIDE                 | 0.150                                           | 0.545                            | 2078.34             | 1133.72             | 0.082                            | 1452.92             | 118.54              |
| A_68_P24326457 | chr6:29383678-29383722                            | NM_001081185:548   | Fln        | INSIDE                 | 0.559                                           | 0.668                            | 1801.03             | 1203.76             | 0.373                            | 1262.17             | 471.32              |
| A_68_P28656381 | chr12:96933833-96933877                           | NM_201518:3419     | Flnr2      | INSIDE                 | 0.470                                           | 0.524                            | 1366.33             | 715.37              | 0.246                            | 1140.47             | 280.64              |
| A_68_P24175497 | chr5:148537110-148537154                          | NM_010228:432      | Flt1       | INSIDE                 | 0.420                                           | 0.617                            | 2038.47             | 1257.73             | 0.259                            | 1729.64             | 447.73              |
| A_68_P24175503 | chr5:148537797-148537841                          | NM_010228:-254     | Flt1       | PROMOTER               | 0.222                                           | 0.456                            | 2386.15             | 1088.41             | 0.101                            | 1826.77             | 185.09              |
| A_68_P24173494 | chr5:148211545-148211589                          | NM_010229:499      | Flt3       | INSIDE                 | 0.580                                           | 0.536                            | 1212.71             | 649.66              | 0.311                            | 1069.32             | 332.11              |
| A_68_P24173495 | chr5:148211661-148211705                          | NM_010229:383      | Flt3       | INSIDE                 | 0.291                                           | 0.651                            | 1303.31             | 848.05              | 0.189                            | 1103.09             | 208.52              |
| A_68_P27783947 | chr11:49447973-49448018                           | NM_008029:24815    | Flt4       | INSIDE                 | 0.526                                           | 1.367                            | 3184.53             | 4353.73             | 0.719                            | 2326.58             | 1673.18             |
| A_68_P31093565 | chr17:23908024-23908068                           | NM_153791:512      | Flywch1    | INSIDE                 | 0.200                                           | 0.580                            | 1344.49             | 779.38              | 0.116                            | 1002.94             | 116.44              |
| A_68_P31093570 | chr17:23908581-23908625                           | NM_153791:-44      | Flywch1    | PROMOTER               | 0.278                                           | 0.546                            | 1754.60             | 957.21              | 0.152                            | 1401.58             | 212.82              |
| A_68_P20842586 | chr1:176432169-176432213                          | NM_019445:235      | Fmn2       | INSIDE                 | 0.229                                           | 0.618                            | 1096.30             | 677.62              | 0.141                            | 846.06              | 119.63              |
| A_68_P20842587 | chr1:176432270-176432314                          | NM_019445:337      | Fmn2       | INSIDE                 | 0.204                                           | 0.704                            | 4111.06             | 2893.75             | 0.144                            | 2781.22             | 399.20              |
| A_68_P20842589 | chr1:176432473-176432517                          | NM_019445:539      | Fmn2       | INSIDE                 | 0.123                                           | 0.446                            | 3203.00             | 1427.30             | 0.055                            | 2178.44             | 119.27              |
| A_68_P20842590 | chr1:176432550-176432594                          | NM_019445:617      | Fmn2       | INSIDE                 | 0.181                                           | 0.638                            | 1574.02             | 1004.34             | 0.115                            | 1155.67             | 133.46              |
| A_68_P28083893 | chr11:103060694-103060738                         | NM_001077698:28265 | Fmn11      | DOWNSTREAM             | 0.438                                           | 0.515                            | 2513.03             | 1294.04             | 0.225                            | 1828.85             | 412.35              |
| A_68_P21221945 | chr2:52717198-52717242                            | NM_172409:319      | Fmn12      | INSIDE                 | 0.340                                           | 0.583                            | 2460.09             | 1434.58             | 0.198                            | 1766.26             | 349.74              |
| A_68_P21221946 | chr2:52717355-52717399                            | NM_172409:475      | Fmn12      | INSIDE                 | 0.618                                           | 0.490                            | 2710.32             | 1329.41             | 0.303                            | 2104.41             | 638.12              |
| A_68_P30479788 | chr15:99200288-99200332                           | NM_011711:587      | Fmn13      | INSIDE                 | 0.503                                           | 0.512                            | 1140.24             | 583.70              | 0.258                            | 798.12              | 205.64              |
| A_68_P30479790 | chr15:99200609-99200653                           | NM_011711:267      | Fmn13      | INSIDE                 | 0.357                                           | 0.491                            | 4277.39             | 2100.99             | 0.175                            | 3175.08             | 557.23              |
| A_68_P20332283 | chr1:71699233-71699279                            | NM_010233:489      | Fn1        | INSIDE                 | 0.297                                           | 0.563                            | 930.89              | 524.18              | 0.167                            | 694.08              | 116.20              |
| A_68_P20332287 | chr1:71699659-71699703                            | NM_010233:65       | Fn1        | INSIDE                 | 0.322                                           | 0.637                            | 2362.01             | 1505.54             | 0.205                            | 1784.10             | 366.11              |
| A_68_P20332288 | chr1:71699744-71699788                            | NM_010233:-21      | Fn1        | PROMOTER               | 0.149                                           | 0.581                            | 1889.71             | 1097.16             | 0.086                            | 1357.67             | 117.40              |



| ProbeName      | Target position of probe on CpG island microarray | TargetID          | GeneSymbol | CpG island Description | Ratio of relative methylation (TiO2-NP/Vehicle) | Sham group                       |                     |                     | TiO <sub>2</sub> -H group        |                     |                     |
|----------------|---------------------------------------------------|-------------------|------------|------------------------|-------------------------------------------------|----------------------------------|---------------------|---------------------|----------------------------------|---------------------|---------------------|
|                |                                                   |                   |            |                        |                                                 | Relative methylation (Cy-5/Cy-3) | Cy-3 signal (Input) | Cy-5 signal (MeDIP) | Relative methylation (Cy-5/Cy-3) | Cy-3 signal (Input) | Cy-5 signal (MeDIP) |
| A_68_P20332289 | chr1:71699909-71699953                            | NM_010233:-185    | Fnl1       | PROMOTER               | 0.108                                           | 0.569                            | 2794.25             | 1591.26             | 0.061                            | 1927.05             | 118.48              |
| A_68_P21107212 | chr2:30996536-30996580                            | NM_001038700:970  | Fnbp1      | INSIDE                 | 0.167                                           | 0.663                            | 1847.81             | 1224.67             | 0.111                            | 1328.38             | 146.85              |
| A_68_P21107213 | chr2:30996649-30996693                            | NM_001038700:858  | Fnbp1      | INSIDE                 | 0.155                                           | 0.658                            | 1885.44             | 1241.40             | 0.102                            | 1219.02             | 124.70              |
| A_68_P21107214 | chr2:30996795-30996839                            | NM_001038700:712  | Fnbp1      | INSIDE                 | 0.240                                           | 0.658                            | 2276.84             | 1498.09             | 0.158                            | 1765.69             | 278.45              |
| A_68_P22483658 | chr3:122321383-122321434                          | NM_001114665:1177 | Fnbp11     | INSIDE                 | 0.193                                           | 0.592                            | 1512.14             | 894.47              | 0.114                            | 1050.53             | 120.14              |
| A_68_P29712961 | chr14:72932323-72932367                           | NM_207636:177466  | Fndc3a     | DOWNSTREAM             | 0.246                                           | 0.458                            | 1223.38             | 559.76              | 0.113                            | 1044.89             | 117.72              |
| A_68_P29713895 | chr14:73110156-73110200                           | NM_207636:-368    | Fndc3a     | PROMOTER               | 0.158                                           | 0.678                            | 1409.74             | 956.30              | 0.107                            | 1165.62             | 125.23              |
| A_68_P27810087 | chr11:54251592-54251636                           | NM_173753:-66     | Fnpl1      | PROMOTER               | 0.569                                           | 0.658                            | 2478.66             | 1632.10             | 0.375                            | 2100.32             | 787.14              |
| A_68_P28604312 | chr12:86814373-86814417                           | NM_010234:-456    | Fos        | PROMOTER               | 0.155                                           | 0.490                            | 1847.43             | 904.56              | 0.076                            | 1536.61             | 116.89              |
| A_68_P28604396 | chr12:86827240-86827284                           | NM_010234:12412   | Fos        | DOWNSTREAM             | 0.597                                           | 0.620                            | 1083.29             | 671.61              | 0.370                            | 897.62              | 332.01              |
| A_68_P28604402 | chr12:86827971-86828024                           | NM_010234:13147   | Fos        | DOWNSTREAM             | 0.158                                           | 0.618                            | 3691.79             | 2280.92             | 0.097                            | 2586.93             | 252.13              |
| A_68_P24992574 | chr7:19890287-19890331                            | NM_008036:5086    | Fosb       | INSIDE                 | 0.185                                           | 0.518                            | 2361.03             | 1223.60             | 0.096                            | 1677.33             | 160.66              |
| A_68_P24992575 | chr7:19890451-19890495                            | NM_008036:4922    | Fosb       | INSIDE                 | 0.194                                           | 0.507                            | 2537.61             | 1286.21             | 0.099                            | 1860.47             | 183.26              |
| A_68_P24992615 | chr7:19895551-19895595                            | NM_008036:-178    | Fosb       | PROMOTER               | 0.339                                           | 0.558                            | 1114.98             | 622.51              | 0.189                            | 933.85              | 176.96              |
| A_68_P24992660 | chr7:19905290-19905334                            | NM_008036:-9918   | Fosb       | PROMOTER               | 0.123                                           | 0.710                            | 2042.26             | 1450.16             | 0.087                            | 1557.15             | 135.59              |
| A_68_P31928718 | chr19:5447671-5447715                             | NM_010235:-5      | Fosl1      | PROMOTER               | 0.632                                           | 0.622                            | 1066.72             | 663.68              | 0.393                            | 950.71              | 373.71              |
| A_68_P31928719 | chr19:5447756-5447800                             | NM_010235:81      | Fosl1      | INSIDE                 | 0.584                                           | 0.663                            | 1175.44             | 778.85              | 0.387                            | 992.25              | 383.70              |
| A_68_P31928721 | chr19:5447928-5447972                             | NM_010235:253     | Fosl1      | INSIDE                 | 0.513                                           | 0.555                            | 2362.33             | 1312.03             | 0.285                            | 1703.15             | 485.09              |
| A_68_P23582142 | chr5:32435789-32435833                            | NM_008037:-3034   | Fosl2      | PROMOTER               | 0.156                                           | 0.658                            | 1698.17             | 1117.73             | 0.103                            | 1267.59             | 130.06              |
| A_68_P23582162 | chr5:32438904-32438948                            | NM_008037:82      | Fosl2      | INSIDE                 | 0.652                                           | 0.693                            | 1512.24             | 1047.93             | 0.451                            | 1175.62             | 530.76              |
| A_68_P28463161 | chr12:58640100-58640144                           | NM_008259:6986    | Foxa1      | DOWNSTREAM             | 0.279                                           | 0.579                            | 959.17              | 555.42              | 0.162                            | 804.71              | 130.17              |
| A_68_P28463221 | chr12:58647081-58647125                           | NM_008259:6       | Foxa1      | INSIDE                 | 0.606                                           | 0.499                            | 1992.93             | 993.54              | 0.302                            | 1599.98             | 483.68              |
| A_68_P21727904 | chr2:147870499-147870543                          | NM_010446:2185    | Foxa2      | INSIDE                 | 0.558                                           | 0.632                            | 2231.15             | 1409.17             | 0.353                            | 1644.72             | 580.08              |
| A_68_P21727905 | chr2:147870580-147870624                          | NM_010446:2103    | Foxa2      | INSIDE                 | 0.104                                           | 0.662                            | 8649.96             | 5730.24             | 0.069                            | 6086.19             | 419.37              |
| A_68_P21727910 | chr2:147871145-147871199                          | NM_010446:1533    | Foxa2      | INSIDE                 | 0.212                                           | 0.488                            | 1554.78             | 758.55              | 0.104                            | 1116.50             | 115.72              |
| A_68_P21727914 | chr2:147871631-147871680                          | NM_010446:1050    | Foxa2      | INSIDE                 | 0.296                                           | 0.644                            | 871.17              | 561.09              | 0.191                            | 628.51              | 119.74              |
| A_68_P21727918 | chr2:147872154-147872201                          | NM_010446:528     | Foxa2      | INSIDE                 | 0.502                                           | 0.593                            | 1016.49             | 602.73              | 0.298                            | 746.00              | 222.03              |
| A_68_P21727937 | chr2:147874425-147874470                          | NM_010446:-1742   | Foxa2      | PROMOTER               | 0.385                                           | 0.672                            | 1303.99             | 875.82              | 0.258                            | 1089.74             | 281.64              |
| A_68_P26612672 | chr9:69607372-69607416                            | NM_022378:1353    | Foxb1      | INSIDE                 | 0.360                                           | 0.654                            | 1741.68             | 1139.07             | 0.236                            | 1300.54             | 306.29              |
| A_68_P26612681 | chr9:69608333-69608380                            | NM_022378:391     | Foxb1      | INSIDE                 | 0.262                                           | 0.575                            | 1502.34             | 863.18              | 0.151                            | 1310.12             | 197.56              |
| A_68_P26612686 | chr9:69609029-69609073                            | NM_022378:-303    | Foxb1      | PROMOTER               | 0.565                                           | 0.672                            | 2272.22             | 1527.08             | 0.380                            | 1816.04             | 689.95              |
| A_68_P26612687 | chr9:69609097-69609152                            | NM_022378:-377    | Foxb1      | PROMOTER               | 0.254                                           | 0.584                            | 1028.12             | 600.77              | 0.149                            | 776.19              | 115.31              |
| A_68_P31982703 | chr19:16947053-16947097                           | NM_008023:1246    | Foxb2      | INSIDE                 | 0.235                                           | 0.394                            | 1598.16             | 629.53              | 0.093                            | 1266.31             | 117.41              |
| A_68_P31982708 | chr19:16947889-16947933                           | NM_008023:410     | Foxb2      | INSIDE                 | 0.358                                           | 0.689                            | 1490.93             | 1026.98             | 0.247                            | 1092.31             | 269.29              |
| A_68_P31982719 | chr19:16949088-16949132                           | NM_008023:-790    | Foxb2      | PROMOTER               | 0.193                                           | 0.442                            | 1831.95             | 810.28              | 0.085                            | 1445.01             | 123.30              |
| A_68_P28925094 | chr13:31898196-31898240                           | NM_008592:-296    | Foxc1      | PROMOTER               | 0.586                                           | 0.561                            | 1913.30             | 1073.09             | 0.329                            | 1442.34             | 474.33              |
| A_68_P28925105 | chr13:31899742-31899786                           | NM_008592:1250    | Foxc1      | INSIDE                 | 0.212                                           | 0.352                            | 2137.96             | 753.60              | 0.075                            | 1619.39             | 121.05              |
| A_68_P26224615 | chr8:123641830-123641874                          | NM_013519:1782    | Foxc2      | INSIDE                 | 0.652                                           | 0.439                            | 1379.86             | 606.37              | 0.286                            | 1020.43             | 292.22              |
| A_68_P29257118 | chr13:99124161-99124205                           | NM_008242:-17     | Foxd1      | PROMOTER               | 0.402                                           | 0.510                            | 1490.33             | 760.15              | 0.205                            | 1157.08             | 237.16              |
| A_68_P23222200 | chr4:114574734-114574778                          | NM_008593:6747    | Foxd2      | DOWNSTREAM             | 0.594                                           | 0.415                            | 1753.67             | 727.13              | 0.246                            | 1345.87             | 331.71              |
| A_68_P23222252 | chr4:114581006-114581050                          | NM_008593:475     | Foxd2      | INSIDE                 | 0.653                                           | 0.663                            | 984.16              | 652.19              | 0.433                            | 828.85              | 358.66              |
| A_68_P23145500 | chr4:99317555-99317599                            | NM_010425:-5413   | Foxd3      | PROMOTER               | 0.473                                           | 0.624                            | 2532.12             | 1581.00             | 0.295                            | 1875.23             | 553.52              |
| A_68_P23145525 | chr4:99320580-99320624                            | NM_010425:-2387   | Foxd3      | PROMOTER               | 0.567                                           | 0.458                            | 1131.51             | 518.60              | 0.260                            | 984.49              | 256.00              |
| A_68_P23145544 | chr4:99322690-99322737                            | NM_010425:-276    | Foxd3      | PROMOTER               | 0.299                                           | 0.633                            | 841.55              | 532.51              | 0.189                            | 638.07              | 120.81              |

| ProbeName      | Target position of probe on CpG island microarray | TargetID          | GeneSymbol | CpG island Description | Ratio of relative methylation (TiO2-NP/Vehicle) | Sham group                       |                     |                     | TiO <sub>2</sub> -H group        |                     |                     |
|----------------|---------------------------------------------------|-------------------|------------|------------------------|-------------------------------------------------|----------------------------------|---------------------|---------------------|----------------------------------|---------------------|---------------------|
|                |                                                   |                   |            |                        |                                                 | Relative methylation (Cy-5/Cy-3) | Cy-3 signal (Input) | Cy-5 signal (MeDIP) | Relative methylation (Cy-5/Cy-3) | Cy-3 signal (Input) | Cy-5 signal (MeDIP) |
| A_68_P23145554 | chr4:99323682-99323726                            | NM_010425:715     | Foxd3      | INSIDE                 | 0.189                                           | 0.694                            | 4633.99             | 3218.02             | 0.131                            | 3146.09             | 412.53              |
| A_68_P32026410 | chr19:24971751-24971795                           | NM_008022:4027    | Foxd4      | DOWNSTREAM             | 0.435                                           | 0.395                            | 1349.91             | 532.92              | 0.172                            | 1103.84             | 189.46              |
| A_68_P32026412 | chr19:24971921-24971965                           | NM_008022:3857    | Foxd4      | DOWNSTREAM             | 0.380                                           | 0.406                            | 1833.59             | 744.71              | 0.154                            | 1366.72             | 210.77              |
| A_68_P32026439 | chr19:24975135-24975179                           | NM_008022:643     | Foxd4      | INSIDE                 | 0.666                                           | 0.698                            | 2978.11             | 2077.88             | 0.465                            | 2138.93             | 993.63              |
| A_68_P22888257 | chr4:46356845-46356889                            | NM_183298:-199    | Foxe1      | PROMOTER               | 0.375                                           | 0.620                            | 1158.31             | 717.90              | 0.232                            | 1056.51             | 245.61              |
| A_68_P23222364 | chr4:114598169-114598213                          | NM_015758:428     | Foxe3      | INSIDE                 | 0.335                                           | 0.481                            | 2199.74             | 1058.09             | 0.161                            | 1748.13             | 281.77              |
| A_68_P23222365 | chr4:114598324-114598368                          | NM_015758:272     | Foxe3      | INSIDE                 | 0.271                                           | 0.530                            | 1483.79             | 787.09              | 0.143                            | 1185.89             | 170.17              |
| A_68_P23222366 | chr4:114598399-114598443                          | NM_015758:198     | Foxe3      | INSIDE                 | 0.326                                           | 0.370                            | 2556.91             | 946.80              | 0.121                            | 2042.06             | 246.38              |
| A_68_P23222368 | chr4:114598578-114598622                          | NM_015758:18      | Foxe3      | INSIDE                 | 0.276                                           | 0.630                            | 2720.76             | 1714.30             | 0.174                            | 2103.50             | 366.27              |
| A_68_P26224342 | chr8:123606667-123606711                          | NM_010426:-1685   | Foxfla     | PROMOTER               | 0.602                                           | 0.463                            | 1434.04             | 663.83              | 0.279                            | 1035.19             | 288.39              |
| A_68_P26224353 | chr8:123607977-123608021                          | NM_010426:-375    | Foxfla     | PROMOTER               | 0.397                                           | 0.504                            | 1890.38             | 952.54              | 0.200                            | 1686.45             | 337.20              |
| A_68_P28924020 | chr13:31712001-31712045                           | NM_010225:-5662   | Foxf2      | PROMOTER               | 0.352                                           | 0.535                            | 1077.89             | 576.66              | 0.188                            | 951.86              | 179.28              |
| A_68_P28924024 | chr13:31712368-31712412                           | NM_010225:-5294   | Foxf2      | PROMOTER               | 0.522                                           | 0.634                            | 1177.27             | 746.26              | 0.331                            | 925.39              | 306.28              |
| A_68_P28924076 | chr13:31718416-31718460                           | NM_010225:754     | Foxf2      | INSIDE                 | 0.268                                           | 0.525                            | 1141.36             | 599.10              | 0.141                            | 950.70              | 133.64              |
| A_68_P28924078 | chr13:31718670-31718714                           | NM_010225:1008    | Foxf2      | INSIDE                 | 0.152                                           | 0.455                            | 2481.07             | 1129.51             | 0.069                            | 1703.53             | 118.07              |
| A_68_P28924079 | chr13:31718773-31718817                           | NM_010225:1110    | Foxf2      | INSIDE                 | 0.607                                           | 0.700                            | 4496.20             | 3149.18             | 0.425                            | 3390.73             | 1440.90             |
| A_68_P28924080 | chr13:31718919-31718963                           | NM_010225:1256    | Foxf2      | INSIDE                 | 0.407                                           | 0.689                            | 3172.57             | 2185.00             | 0.281                            | 2213.14             | 621.08              |
| A_68_P28924098 | chr13:31721161-31721205                           | NM_010225:3498    | Foxf2      | INSIDE                 | 0.365                                           | 0.641                            | 1875.27             | 1201.92             | 0.234                            | 1376.93             | 321.71              |
| A_68_P28924099 | chr13:31721274-31721321                           | NM_010225:3613    | Foxf2      | INSIDE                 | 0.315                                           | 0.404                            | 1337.29             | 540.05              | 0.127                            | 908.42              | 115.62              |
| A_68_P28419951 | chr12:50484189-50484235                           | NM_008241:219     | Foxg1      | INSIDE                 | 0.143                                           | 0.663                            | 1701.63             | 1128.29             | 0.095                            | 1264.70             | 119.59              |
| A_68_P28419964 | chr12:50485980-50486024                           | NM_008241:2009    | Foxg1      | INSIDE                 | 0.472                                           | 0.553                            | 2152.69             | 1189.94             | 0.261                            | 1712.87             | 446.76              |
| A_68_P28419966 | chr12:50486205-50486249                           | NM_008241:2233    | Foxg1      | INSIDE                 | 0.311                                           | 0.427                            | 1752.30             | 747.96              | 0.133                            | 1278.08             | 169.42              |
| A_68_P28419968 | chr12:50486468-50486512                           | NM_008241:2497    | Foxg1      | INSIDE                 | 0.085                                           | 0.715                            | 3350.25             | 2393.93             | 0.061                            | 2453.86             | 149.14              |
| A_68_P28419969 | chr12:50486658-50486702                           | NM_008241:2687    | Foxg1      | INSIDE                 | 0.620                                           | 0.691                            | 2377.01             | 1642.31             | 0.428                            | 1716.69             | 735.02              |
| A_68_P24533906 | chr6:70906262-70906307                            | NM_001101464:-315 | Foxi3      | PROMOTER               | 0.159                                           | 0.633                            | 3695.05             | 2340.27             | 0.101                            | 2582.63             | 260.88              |
| A_68_P24533907 | chr6:70906387-70906431                            | NM_001101464:-191 | Foxi3      | PROMOTER               | 0.457                                           | 0.683                            | 5098.82             | 3483.92             | 0.313                            | 3316.49             | 1036.53             |
| A_68_P24533908 | chr6:70906504-70906548                            | NM_001101464:-73  | Foxi3      | PROMOTER               | 0.652                                           | 0.571                            | 1723.25             | 984.33              | 0.373                            | 1304.38             | 486.08              |
| A_68_P24533909 | chr6:70906592-70906636                            | NM_001101464:15   | Foxi3      | INSIDE                 | 0.244                                           | 0.417                            | 1622.51             | 676.55              | 0.102                            | 1155.70             | 117.56              |
| A_68_P24533914 | chr6:70907055-70907100                            | NM_001101464:478  | Foxi3      | INSIDE                 | 0.474                                           | 0.616                            | 1034.28             | 637.53              | 0.292                            | 821.83              | 240.22              |
| A_68_P28158771 | chr11:116195721-116195765                         | NM_008240:926     | Foxj1      | INSIDE                 | 0.308                                           | 0.423                            | 1299.01             | 549.84              | 0.130                            | 965.13              | 125.85              |
| A_68_P28158778 | chr11:116196536-116196580                         | NM_008240:110     | Foxj1      | INSIDE                 | 0.603                                           | 0.698                            | 1889.70             | 1318.66             | 0.421                            | 1406.04             | 591.32              |
| A_68_P28158782 | chr11:116197021-116197065                         | NM_008240:-374    | Foxj1      | PROMOTER               | 0.285                                           | 0.470                            | 1201.62             | 564.88              | 0.134                            | 868.88              | 116.34              |
| A_68_P26224676 | chr8:123649716-123649760                          | NM_008024:-1846   | Foxl1      | PROMOTER               | 0.178                                           | 0.486                            | 1908.77             | 927.75              | 0.086                            | 1476.05             | 127.61              |
| A_68_P26224698 | chr8:123652159-123652203                          | NM_008024:596     | Foxl1      | INSIDE                 | 0.153                                           | 0.610                            | 1808.61             | 1102.87             | 0.094                            | 1324.91             | 123.89              |
| A_68_P26224705 | chr8:123653054-123653101                          | NM_008024:1493    | Foxl1      | INSIDE                 | 0.498                                           | 0.652                            | 1045.68             | 681.81              | 0.325                            | 798.27              | 259.20              |
| A_68_P26761439 | chr9:98857310-98857354                            | NM_012020:1307    | Foxl2      | INSIDE                 | 0.646                                           | 0.380                            | 2619.83             | 996.83              | 0.246                            | 2193.86             | 538.88              |
| A_68_P26761442 | chr9:98857658-98857702                            | NM_012020:1655    | Foxl2      | INSIDE                 | 0.204                                           | 0.615                            | 1224.55             | 752.82              | 0.125                            | 962.15              | 120.56              |
| A_68_P26761419 | chr9:98855194-98855238                            | NR_003248:513     | Foxl2os    | INSIDE                 | 0.258                                           | 0.554                            | 995.23              | 551.29              | 0.143                            | 826.08              | 117.92              |
| A_68_P26761425 | chr9:98855848-98855892                            | NR_003248:-141    | Foxl2os    | DIVERGENT_PROMOTER     | 0.379                                           | 0.439                            | 1241.13             | 544.51              | 0.166                            | 1052.26             | 175.12              |
| A_68_P24838573 | chr6:128313280-128313324                          | NM_008021:291     | Foxm1      | INSIDE                 | 0.335                                           | 0.536                            | 2103.41             | 1127.86             | 0.179                            | 1542.37             | 276.72              |
| A_68_P31427927 | chr17:88841025-88841069                           | NM_180974:995     | Foxn2      | INSIDE                 | 0.265                                           | 0.520                            | 3096.73             | 1609.43             | 0.138                            | 2419.52             | 332.78              |
| A_68_P24002948 | chr5:114724032-114724076                          | NM_148935:-284    | Foxn4      | PROMOTER               | 0.627                                           | 0.538                            | 1086.21             | 584.61              | 0.338                            | 861.39              | 290.73              |
| A_68_P24002949 | chr5:114724178-114724222                          | NM_148935:-430    | Foxn4      | PROMOTER               | 0.305                                           | 0.583                            | 2697.56             | 1572.79             | 0.178                            | 1877.98             | 334.28              |
| A_68_P27094090 | chr10:41997470-41997514                           | NM_019740:-944    | Foxo3      | PROMOTER               | 0.259                                           | 0.371                            | 3378.20             | 1254.08             | 0.096                            | 2531.14             | 243.64              |

| ProbeName      | Target position of probe on CpG island microarray | TargetID            | GeneSymbol | CpG island Description | Ratio of relative methylation (TiO2-NP/Vehicle) | Sham group                       |                     |                     | TiO <sub>2</sub> -H group        |                     |                     |
|----------------|---------------------------------------------------|---------------------|------------|------------------------|-------------------------------------------------|----------------------------------|---------------------|---------------------|----------------------------------|---------------------|---------------------|
|                |                                                   |                     |            |                        |                                                 | Relative methylation (Cy-5/Cy-3) | Cy-3 signal (Input) | Cy-5 signal (MeDIP) | Relative methylation (Cy-5/Cy-3) | Cy-3 signal (Input) | Cy-5 signal (MeDIP) |
| A_68_P23250455 | chr4:119959495-119959539                          | NM_194060:350       | Foxo6      | INSIDE                 | 0.175                                           | 0.463                            | 1916.34             | 888.09              | 0.081                            | 1501.80             | 121.52              |
| A_68_P23250459 | chr4:119960018-119960062                          | NM_194060:-174      | Foxo6      | PROMOTER               | 0.522                                           | 0.507                            | 6242.18             | 3163.84             | 0.264                            | 4501.15             | 1190.08             |
| A_68_P31214659 | chr17:48009732-48009776                           | NM_001110824:51827  | Foxp4      | INSIDE                 | 0.284                                           | 1.607                            | 1108.44             | 1780.99             | 0.456                            | 915.59              | 417.32              |
| A_68_P28923675 | chr13:31650511-31650560                           | NM_008239:497       | Foxq1      | INSIDE                 | 0.664                                           | 0.607                            | 1112.82             | 675.23              | 0.403                            | 946.63              | 381.14              |
| A_68_P28923680 | chr13:31651196-31651240                           | NM_008239:1180      | Foxq1      | INSIDE                 | 0.190                                           | 0.435                            | 1817.96             | 791.00              | 0.083                            | 1430.00             | 118.14              |
| A_68_P28923679 | chr13:31651001-31651045                           | NM_008239:984       | Foxq1      | INSIDE                 | 0.670                                           | 0.669                            | 2172.00             | 1452.05             | 0.448                            | 1561.09             | 698.77              |
| A_68_P21116904 | chr2:32549583-32549627                            | NM_010236:91        | Fpgs       | INSIDE                 | 0.442                                           | 0.533                            | 2061.20             | 1098.37             | 0.236                            | 1755.02             | 413.65              |
| A_68_P22666539 | chr3:154756237-154756282                          | NM_029330:83        | Fpgt       | INSIDE                 | 0.253                                           | 0.578                            | 1023.23             | 591.59              | 0.146                            | 824.71              | 120.69              |
| A_68_P32117376 | chr19:41904363-41904407                           | NM_008043:-75       | Frat1      | PROMOTER               | 0.628                                           | 0.617                            | 1990.52             | 1228.56             | 0.387                            | 1661.84             | 643.79              |
| A_68_P32117486 | chr19:41921651-41921695                           | NM_177603:950       | Frat2      | INSIDE                 | 0.474                                           | 0.525                            | 2050.18             | 1075.58             | 0.249                            | 1582.09             | 393.70              |
| A_68_P26000510 | chr8:83135226-83135270                            | NM_001167898:311    | Frem3      | INSIDE                 | 0.473                                           | 0.687                            | 1682.60             | 1156.70             | 0.325                            | 1417.04             | 460.90              |
| A_68_P23018911 | chr4:73659893-73659937                            | NM_172869:408       | Frm3       | INSIDE                 | 0.412                                           | 0.571                            | 1375.71             | 786.02              | 0.235                            | 1140.99             | 268.36              |
| A_68_P20967779 | chr2:4322142-4322186                              | NM_001177843:143    | Frm4a      | INSIDE                 | 0.207                                           | 0.513                            | 1447.52             | 742.55              | 0.106                            | 1134.20             | 120.21              |
| A_68_P24674230 | chr6:97567022-97567066                            | NM_145148:607       | Frm4b      | INSIDE                 | 0.469                                           | 0.572                            | 1018.31             | 582.90              | 0.268                            | 869.90              | 233.50              |
| A_68_P24674231 | chr6:97567120-97567164                            | NM_145148:509       | Frm4b      | INSIDE                 | 0.448                                           | 0.560                            | 5348.50             | 2992.85             | 0.251                            | 3784.83             | 949.10              |
| A_68_P24674232 | chr6:97567208-97567252                            | NM_145148:421       | Frm4b      | INSIDE                 | 0.499                                           | 0.668                            | 1871.75             | 1250.40             | 0.333                            | 1258.95             | 419.73              |
| A_68_P32815027 | chrX:164560836-164560880                          | NM_001033330:454307 | Frm4d      | INSIDE                 | 0.347                                           | 1.463                            | 933.95              | 1366.66             | 0.508                            | 557.14              | 283.14              |
| A_68_P27479719 | chr10:116584876-116584920                         | NM_177798:632       | Frs2       | INSIDE                 | 0.626                                           | 0.734                            | 2670.68             | 1961.34             | 0.460                            | 1711.13             | 786.38              |
| A_68_P31213681 | chr17:47831661-47831705                           | NM_144939:-473      | Frs3       | DIVERGENT_PROMOTER     | 0.159                                           | 0.476                            | 6187.53             | 2944.19             | 0.076                            | 3978.62             | 301.12              |
| A_68_P31213682 | chr17:47831829-47831878                           | NM_144939:-302      | Frs3       | DIVERGENT_PROMOTER     | 0.156                                           | 0.518                            | 2006.03             | 1039.56             | 0.081                            | 1492.51             | 121.04              |
| A_68_P23795929 | chr5:73524595-73524639                            | NM_028194:123241    | Fryl       | INSIDE                 | 0.621                                           | 2.907                            | 717.25              | 2084.89             | 1.804                            | 617.36              | 1113.74             |
| A_68_P23796634 | chr5:73647594-73647638                            | NM_028194:241       | Fryl       | INSIDE                 | 0.612                                           | 0.645                            | 854.45              | 551.52              | 0.395                            | 702.24              | 277.44              |
| A_68_P23796637 | chr5:73647888-73647932                            | NM_028194:-53       | Fryl       | PROMOTER               | 0.399                                           | 0.474                            | 1998.35             | 946.81              | 0.189                            | 1621.76             | 306.32              |
| A_68_P23796638 | chr5:73648010-73648054                            | NM_028194:-175      | Fryl       | PROMOTER               | 0.492                                           | 0.432                            | 1338.67             | 578.04              | 0.212                            | 1027.83             | 218.19              |
| A_68_P21374843 | chr2:80287482-80287526                            | NM_011356:49        | Frzb       | INSIDE                 | 0.247                                           | 0.517                            | 1865.58             | 964.17              | 0.127                            | 1511.34             | 192.69              |
| A_68_P21374845 | chr2:80287756-80287800                            | NM_011356:-225      | Frzb       | PROMOTER               | 0.587                                           | 0.598                            | 1486.51             | 889.05              | 0.351                            | 1228.64             | 431.51              |
| A_68_P29346589 | chr13:115249074-115249124                         | NM_008046:-160      | Fst        | PROMOTER               | 0.071                                           | 1.475                            | 1858.64             | 2741.70             | 0.105                            | 1247.68             | 130.53              |
| A_68_P27278867 | chr10:79240093-79240137                           | NM_031380:96        | Fstl3      | INSIDE                 | 0.241                                           | 1.481                            | 8370.81             | 12393.22            | 0.357                            | 5246.39             | 1873.49             |
| A_68_P27278868 | chr10:79240243-79240287                           | NM_031380:246       | Fstl3      | INSIDE                 | 0.596                                           | 2.279                            | 5870.34             | 13380.16            | 1.358                            | 3783.22             | 5138.65             |
| A_68_P27800930 | chr11:52578204-52578248                           | NM_177059:19        | Fstl4      | INSIDE                 | 0.303                                           | 0.526                            | 1767.90             | 929.20              | 0.159                            | 1438.16             | 228.84              |
| A_68_P27800933 | chr11:52578613-52578657                           | NM_177059:427       | Fstl4      | INSIDE                 | 0.336                                           | 0.529                            | 2350.07             | 1242.50             | 0.178                            | 1799.39             | 319.63              |
| A_68_P27800935 | chr11:52578820-52578864                           | NM_177059:635       | Fstl4      | INSIDE                 | 0.264                                           | 0.604                            | 2257.04             | 1363.23             | 0.159                            | 1817.90             | 289.88              |
| A_68_P31947674 | chr19:10056973-10057017                           | NM_010239:-198      | Fth1       | PROMOTER               | 0.260                                           | 0.530                            | 1611.95             | 854.66              | 0.138                            | 1292.12             | 178.30              |
| A_68_P26058236 | chr8:93837616-93837660                            | NM_011936:215       | Fto        | INSIDE                 | 0.630                                           | 0.579                            | 1268.19             | 734.29              | 0.365                            | 940.46              | 343.04              |
| A_68_P26161392 | chr8:112741955-112741999                          | NM_146215:117       | Ftsjdl     | INSIDE                 | 0.323                                           | 0.714                            | 3057.34             | 2182.95             | 0.231                            | 2212.69             | 510.79              |
| A_68_P22649280 | chr3:151873415-151873459                          | NM_057172:15        | Fubp1      | INSIDE                 | 0.232                                           | 0.596                            | 2909.92             | 1734.84             | 0.138                            | 1925.74             | 266.55              |
| A_68_P21109954 | chr2:31428423-31428467                            | NM_001033389:200    | Fubp3      | INSIDE                 | 0.660                                           | 0.417                            | 1273.80             | 531.61              | 0.275                            | 1152.89             | 317.49              |
| A_68_P23331228 | chr4:135476820-135476864                          | NM_024243:202       | Fuca1      | INSIDE                 | 0.324                                           | 0.616                            | 1569.76             | 967.72              | 0.200                            | 1295.05             | 258.75              |
| A_68_P26165492 | chr8:113426392-113426436                          | NM_181666:-55       | Fuk        | PROMOTER               | 0.670                                           | 0.566                            | 1644.99             | 931.16              | 0.379                            | 1458.43             | 553.00              |
| A_68_P25508346 | chr7:135110839-135110887                          | NM_139149:-130      | Fus        | PROMOTER               | 0.307                                           | 0.360                            | 1514.75             | 544.96              | 0.111                            | 1206.26             | 133.34              |
| A_68_P29448410 | chr14:21514889-21514933                           | NM_028428:721       | Fut11      | INSIDE                 | 0.270                                           | 0.353                            | 1663.01             | 586.40              | 0.095                            | 1267.34             | 120.88              |
| A_68_P29448411 | chr14:21514995-21515039                           | NM_028428:827       | Fut11      | INSIDE                 | 0.162                                           | 0.621                            | 2215.40             | 1375.21             | 0.100                            | 1696.01             | 170.16              |
| A_68_P29448412 | chr14:21515116-21515167                           | NM_028428:952       | Fut11      | INSIDE                 | 0.306                                           | 0.604                            | 948.23              | 572.44              | 0.185                            | 646.75              | 119.45              |
| A_68_P26319145 | chr9:14556214-14556258                            | NM_010242:330       | Fut4       | INSIDE                 | 0.499                                           | 0.513                            | 1155.82             | 592.86              | 0.256                            | 969.65              | 248.00              |

| ProbeName      | Target position of probe on CpG island microarray | TargetID          | GeneSymbol    | CpG island Description | Ratio of relative methylation (TiO2-NP/Vehicle) | Sham group                       |                     |                     | TiO <sub>2</sub> -H group        |                     |                     |
|----------------|---------------------------------------------------|-------------------|---------------|------------------------|-------------------------------------------------|----------------------------------|---------------------|---------------------|----------------------------------|---------------------|---------------------|
|                |                                                   |                   |               |                        |                                                 | Relative methylation (Cy-5/Cy-3) | Cy-3 signal (Input) | Cy-5 signal (MeDIP) | Relative methylation (Cy-5/Cy-3) | Cy-3 signal (Input) | Cy-5 signal (MeDIP) |
| A_68_P28558324 | chr12:78338946-78338990                           | NM_016893:-1039   | Fut8          | PROMOTER               | 0.393                                           | 0.501                            | 2557.23             | 1281.73             | 0.197                            | 2032.50             | 400.01              |
| A_68_P22791943 | chr4:25726823-25726867                            | NM_010243:306     | Fut9          | INSIDE                 | 0.251                                           | 0.613                            | 3352.60             | 2053.88             | 0.154                            | 2601.33             | 399.92              |
| A_68_P22791944 | chr4:25726907-25726951                            | NM_010243:222     | Fut9          | INSIDE                 | 0.522                                           | 0.746                            | 3942.61             | 2941.31             | 0.389                            | 3012.64             | 1172.89             |
| A_68_P25089991 | chr7:52151549-52151593                            | NM_027376:122     | Fuz           | INSIDE                 | 0.321                                           | 0.553                            | 1968.66             | 1087.93             | 0.177                            | 1562.48             | 277.33              |
| A_68_P25089992 | chr7:52151653-52151697                            | NM_027376:226     | Fuz           | INSIDE                 | 0.291                                           | 0.609                            | 1832.41             | 1115.85             | 0.178                            | 1331.80             | 236.40              |
| A_68_P32022550 | chr19:24354685-24354736                           | NM_008044:366     | Fxn           | INSIDE                 | 0.191                                           | 0.385                            | 2407.72             | 926.92              | 0.074                            | 1747.14             | 128.46              |
| A_68_P25034759 | chr7:31837288-31837332                            | NM_052991:2562    | Fxyd1         | INSIDE                 | 0.205                                           | 0.516                            | 1508.92             | 778.84              | 0.106                            | 1191.40             | 126.36              |
| A_68_P26897303 | chr9:123761167-123761211                          | NM_001110253:-168 | Fyco1         | PROMOTER               | 0.418                                           | 0.378                            | 2746.02             | 1037.60             | 0.158                            | 2152.23             | 339.85              |
| A_68_P27077934 | chr10:39089328-39089372                           | NM_001122892:-254 | Fyn           | PROMOTER               | 0.485                                           | 1.459                            | 9707.23             | 14159.60            | 0.708                            | 6682.81             | 4732.36             |
| A_68_P27077942 | chr10:39090283-39090342                           | NM_001122892:708  | Fyn           | INSIDE                 | 0.180                                           | 3.150                            | 6416.29             | 20214.34            | 0.566                            | 3781.55             | 2139.74             |
| A_68_P30655031 | chr16:32877641-32877685                           | NM_001159349:-207 | Fytd1         | DIVERGENT_PROMOTER     | 0.247                                           | 0.679                            | 999.43              | 678.38              | 0.168                            | 908.31              | 152.40              |
| A_68_P23451685 | chr5:4757093-4757137                              | NM_021457:1102    | Fzd1          | INSIDE                 | 0.634                                           | 0.616                            | 1047.22             | 644.60              | 0.390                            | 825.75              | 322.38              |
| A_68_P24084080 | chr5:129107459-129107503                          | NM_175284:500     | Fzd10         | INSIDE                 | 0.460                                           | 0.627                            | 951.34              | 596.55              | 0.289                            | 832.58              | 240.41              |
| A_68_P24084082 | chr5:129107740-129107784                          | NM_175284:782     | Fzd10         | INSIDE                 | 0.316                                           | 0.452                            | 2566.07             | 1159.99             | 0.143                            | 1964.88             | 281.06              |
| A_68_P24084083 | chr5:129107881-129107932                          | NM_175284:926     | Fzd10         | INSIDE                 | 0.281                                           | 0.500                            | 1019.37             | 509.94              | 0.141                            | 844.22              | 118.86              |
| A_68_P28080440 | chr11:102467429-102467473                         | NM_020510:1706    | Fzd2          | INSIDE                 | 0.360                                           | 0.368                            | 2575.05             | 946.93              | 0.132                            | 1850.97             | 244.83              |
| A_68_P28080441 | chr11:102467523-102467567                         | NM_020510:1800    | Fzd2          | INSIDE                 | 0.214                                           | 0.443                            | 1719.82             | 762.55              | 0.095                            | 1281.40             | 121.74              |
| A_68_P29672520 | chr14:65881704-65881748                           | NM_021458:-426    | Fzd3          | DIVERGENT_PROMOTER     | 0.371                                           | 0.390                            | 1823.79             | 710.57              | 0.145                            | 1432.21             | 207.20              |
| A_68_P25307421 | chr7:96553016-96553060                            | NM_008055:163     | Fzd4          | INSIDE                 | 0.383                                           | 0.416                            | 2360.05             | 981.14              | 0.159                            | 1688.85             | 269.13              |
| A_68_P25307424 | chr7:96553350-96553394                            | NM_008055:497     | Fzd4          | INSIDE                 | 0.227                                           | 0.603                            | 1060.52             | 639.19              | 0.137                            | 849.41              | 116.30              |
| A_68_P20294241 | chr1:64781408-64781452                            | NM_001042659:2894 | Fzd5          | INSIDE                 | 0.272                                           | 0.599                            | 1039.29             | 622.94              | 0.163                            | 784.86              | 127.76              |
| A_68_P20294255 | chr1:64783028-64783072                            | NM_001042659:1274 | Fzd5          | INSIDE                 | 0.189                                           | 0.588                            | 2056.42             | 1210.10             | 0.111                            | 1543.33             | 172.02              |
| A_68_P20294266 | chr1:64784611-64784655                            | NM_001042659:-308 | Fzd5          | PROMOTER               | 0.295                                           | 0.531                            | 1159.38             | 615.42              | 0.156                            | 868.90              | 135.84              |
| A_68_P20264182 | chr1:59538765-59538809                            | NM_008057:-204    | Fzd7          | PROMOTER               | 0.330                                           | 0.652                            | 1126.55             | 735.04              | 0.215                            | 892.72              | 191.95              |
| A_68_P20264196 | chr1:59540370-59540414                            | NM_008057:1402    | Fzd7          | INSIDE                 | 0.291                                           | 0.647                            | 4951.91             | 3202.58             | 0.188                            | 3716.89             | 699.77              |
| A_68_P31484553 | chr18:9213708-9213752                             | NM_008058:877     | Fzd8          | INSIDE                 | 0.256                                           | 0.544                            | 2788.80             | 1517.27             | 0.139                            | 2149.47             | 299.46              |
| A_68_P31484554 | chr18:9213845-9213889                             | NM_008058:1013    | Fzd8          | INSIDE                 | 0.205                                           | 0.504                            | 1373.75             | 691.81              | 0.103                            | 1130.15             | 116.60              |
| A_68_P31484555 | chr18:9214035-9214079                             | NM_008058:1203    | Fzd8          | INSIDE                 | 0.302                                           | 0.639                            | 3884.69             | 2482.56             | 0.193                            | 2795.20             | 539.70              |
| A_68_P31484557 | chr18:9214262-9214306                             | NM_008058:1431    | Fzd8          | INSIDE                 | 0.375                                           | 0.660                            | 1436.17             | 947.72              | 0.248                            | 1152.02             | 285.42              |
| A_68_P31484558 | chr18:9214394-9214440                             | NM_008058:1563    | Fzd8          | INSIDE                 | 0.240                                           | 0.683                            | 1065.65             | 728.21              | 0.164                            | 751.82              | 123.30              |
| A_68_P24115511 | chr5:135726586-135726630                          | NM_010246:309     | Fzd9          | INSIDE                 | 0.484                                           | 0.470                            | 2130.42             | 1001.81             | 0.227                            | 1662.56             | 378.18              |
| A_68_P27289250 | chr10:80840838-80840882                           | NM_019757:255     | Fzr1          | INSIDE                 | 0.068                                           | 1.874                            | 2237.73             | 4194.37             | 0.127                            | 1493.69             | 189.10              |
| A_68_P28429306 | chr12:52449562-52449606                           | NM_001015099:368  | G2e3          | INSIDE                 | 0.548                                           | 0.644                            | 1112.50             | 716.32              | 0.353                            | 1006.48             | 355.44              |
| A_68_P23892218 | chr5:92512396-92512440                            | NM_001080797:-475 | G3bp2         | PROMOTER               | 0.167                                           | 0.609                            | 1476.13             | 898.72              | 0.102                            | 1127.90             | 114.73              |
| A_68_P23892220 | chr5:92512615-92512659                            | NM_001080794:-53  | G3bp2         | PROMOTER               | 0.348                                           | 0.718                            | 2229.52             | 1600.68             | 0.250                            | 1610.20             | 402.39              |
| A_68_P23892222 | chr5:92512823-92512867                            | NM_011816:-83     | G3bp2         | PROMOTER               | 0.576                                           | 0.494                            | 1504.75             | 742.84              | 0.285                            | 1221.40             | 347.50              |
| A_68_P27897193 | chr11:69617732-69617776                           | NR_027913:584     | G630025P09Rik | INSIDE                 | 0.246                                           | 0.603                            | 3433.80             | 2070.82             | 0.148                            | 2527.28             | 374.87              |
| A_68_P31157364 | chr17:35202217-35202261                           | NR_001462:857     | G6b           | INSIDE                 | 0.413                                           | 0.552                            | 2616.09             | 1444.87             | 0.228                            | 1893.95             | 432.00              |
| A_68_P32468048 | chrX:71674396-71674448                            | NM_008062:78      | G6pdx         | INSIDE                 | 0.087                                           | 2.031                            | 1862.12             | 3782.36             | 0.176                            | 685.10              | 120.82              |
| A_68_P28176851 | chr11:119129170-119129216                         | NM_001159324:-88  | Gaa           | PROMOTER               | 0.187                                           | 0.682                            | 1293.27             | 881.53              | 0.128                            | 962.50              | 122.97              |
| A_68_P26001978 | chr8:83403405-83403452                            | NM_021356:950     | Gab1          | INSIDE                 | 0.486                                           | 0.502                            | 1639.93             | 822.60              | 0.244                            | 1281.09             | 312.36              |
| A_68_P26001979 | chr8:83403513-83403557                            | NM_021356:844     | Gab1          | INSIDE                 | 0.538                                           | 0.401                            | 1993.30             | 800.17              | 0.216                            | 1390.58             | 300.27              |
| A_68_P27898357 | chr11:69805074-69805118                           | NM_019749:225     | Gabarap       | INSIDE                 | 0.121                                           | 0.715                            | 6255.46             | 4472.78             | 0.087                            | 4212.30             | 364.58              |
| A_68_P24844081 | chr6:129483283-129483327                          | NM_020590:95      | Gabarap11     | INSIDE                 | 0.414                                           | 0.481                            | 1103.95             | 530.78              | 0.199                            | 834.82              | 165.97              |

| ProbeName      | Target position of probe on CpG island microarray | TargetID        | GeneSymbol | CpG island Description | Ratio of relative methylation (TiO2-NP/Vehicle) | Sham group                       |                     |                     | TiO <sub>2</sub> -H group        |                     |                     |
|----------------|---------------------------------------------------|-----------------|------------|------------------------|-------------------------------------------------|----------------------------------|---------------------|---------------------|----------------------------------|---------------------|---------------------|
|                |                                                   |                 |            |                        |                                                 | Relative methylation (Cy-5/Cy-3) | Cy-3 signal (Input) | Cy-5 signal (MeDIP) | Relative methylation (Cy-5/Cy-3) | Cy-3 signal (Input) | Cy-5 signal (MeDIP) |
| A_68_P26171001 | chr8:114464407-114464460                          | NM_026693:-184  | Gabrapl2   | DIVERGENT_PROMOTER     | 0.219                                           | 0.643                            | 984.49              | 632.93              | 0.141                            | 828.49              | 116.56              |
| A_68_P31166955 | chr17:37183328-37183372                           | NM_019439:440   | Gabbr1     | INSIDE                 | 0.084                                           | 1.401                            | 6152.17             | 8619.26             | 0.117                            | 4556.94             | 535.18              |
| A_68_P31166994 | chr17:37188152-37188196                           | NM_019439:5264  | Gabbr1     | INSIDE                 | 0.197                                           | 0.705                            | 1408.17             | 993.25              | 0.139                            | 1047.40             | 145.25              |
| A_68_P30925866 | chr16:84835027-84835071                           | NM_008065:-320  | Gabpa      | PROMOTER               | 0.327                                           | 0.631                            | 3756.39             | 2371.05             | 0.206                            | 2791.11             | 575.64              |
| A_68_P30925869 | chr16:84835358-84835402                           | NM_008065:12    | Gabpa      | INSIDE                 | 0.413                                           | 0.551                            | 1057.97             | 583.26              | 0.228                            | 789.20              | 179.70              |
| A_68_P21609430 | chr2:126501185-126501229                          | NM_010249:16    | Gabpb1     | INSIDE                 | 0.241                                           | 0.665                            | 1458.02             | 969.02              | 0.160                            | 1358.39             | 217.26              |
| A_68_P21609431 | chr2:126501251-126501295                          | NM_207669:-49   | Gabpb1     | PROMOTER               | 0.634                                           | 0.630                            | 2080.23             | 1309.89             | 0.399                            | 1921.36             | 767.08              |
| A_68_P22342883 | chr3:95021867-95021911                            | NM_029885:-24   | Gabpb2     | PROMOTER               | 0.210                                           | 0.533                            | 2194.14             | 1168.55             | 0.112                            | 1552.65             | 173.45              |
| A_68_P22342884 | chr3:95022045-95022089                            | NM_029885:-202  | Gabpb2     | PROMOTER               | 0.339                                           | 0.656                            | 956.74              | 627.92              | 0.222                            | 804.86              | 179.06              |
| A_68_P23785052 | chr5:71487399-71487443                            | NM_008066:-332  | Gabra2     | PROMOTER               | 0.594                                           | 0.547                            | 1099.64             | 601.65              | 0.325                            | 861.42              | 279.79              |
| A_68_P25151146 | chr7:64764649-64764693                            | NM_176942:709   | Gabra5     | INSIDE                 | 0.415                                           | 0.485                            | 1209.79             | 586.31              | 0.201                            | 1112.35             | 223.50              |
| A_68_P23787825 | chr5:72092392-72092436                            | NM_008069:1160  | Gabrb1     | INSIDE                 | 0.272                                           | 0.496                            | 1200.92             | 595.31              | 0.135                            | 904.97              | 121.84              |
| A_68_P23787826 | chr5:72092511-72092555                            | NM_008069:1278  | Gabrb1     | INSIDE                 | 0.351                                           | 0.641                            | 1713.97             | 1097.91             | 0.225                            | 1363.63             | 307.01              |
| A_68_P25151575 | chr7:64847050-64847094                            | NM_008071:530   | Gabrb3     | INSIDE                 | 0.447                                           | 0.689                            | 3099.78             | 2136.00             | 0.308                            | 2431.03             | 748.86              |
| A_68_P23438376 | chr4:154771887-154771931                          | NM_008072:270   | Gabrd      | INSIDE                 | 0.162                                           | 0.539                            | 1732.08             | 933.40              | 0.087                            | 1431.60             | 124.88              |
| A_68_P25150558 | chr7:64642169-64642213                            | NM_008074:51    | Gabrg3     | INSIDE                 | 0.355                                           | 0.651                            | 1083.07             | 704.54              | 0.231                            | 988.34              | 228.09              |
| A_68_P21059044 | chr2:22478107-22478151                            | NM_008078:282   | Gad2       | INSIDE                 | 0.659                                           | 0.563                            | 2920.10             | 1644.43             | 0.371                            | 2196.90             | 814.91              |
| A_68_P21059051 | chr2:22478980-22479024                            | NM_008078:1156  | Gad2       | INSIDE                 | 0.623                                           | 0.728                            | 2507.45             | 1824.41             | 0.453                            | 1952.96             | 885.11              |
| A_68_P21059052 | chr2:22479080-22479124                            | NM_008078:1256  | Gad2       | INSIDE                 | 0.167                                           | 0.475                            | 1994.87             | 948.28              | 0.079                            | 1525.06             | 120.88              |
| A_68_P24519505 | chr6:66986497-66986541                            | NM_007836:883   | Gadd45a    | INSIDE                 | 0.345                                           | 0.431                            | 2343.74             | 1010.48             | 0.149                            | 1850.66             | 274.91              |
| A_68_P24519506 | chr6:66986584-66986628                            | NM_007836:795   | Gadd45a    | INSIDE                 | 0.492                                           | 0.572                            | 3227.80             | 1846.34             | 0.282                            | 2687.87             | 756.64              |
| A_68_P24519510 | chr6:66987027-66987071                            | NM_007836:353   | Gadd45a    | INSIDE                 | 0.284                                           | 0.657                            | 4073.48             | 2676.09             | 0.187                            | 3289.26             | 613.92              |
| A_68_P27286406 | chr10:80392969-80393019                           | NM_008655:159   | Gadd45b    | INSIDE                 | 0.244                                           | 0.460                            | 1472.03             | 677.22              | 0.112                            | 1063.21             | 119.17              |
| A_68_P27286409 | chr10:80393272-80393316                           | NM_008655:459   | Gadd45b    | INSIDE                 | 0.272                                           | 0.492                            | 3524.87             | 1733.92             | 0.134                            | 2502.37             | 335.36              |
| A_68_P29034749 | chr13:51942380-51942424                           | NM_011817:359   | Gadd45g    | INSIDE                 | 0.511                                           | 0.623                            | 1565.13             | 975.81              | 0.318                            | 1087.34             | 346.26              |
| A_68_P29034751 | chr13:51942528-51942572                           | NM_011817:507   | Gadd45g    | INSIDE                 | 0.486                                           | 1.416                            | 11702.50            | 16567.28            | 0.689                            | 8042.87             | 5539.15             |
| A_68_P29034755 | chr13:51943120-51943164                           | NM_011817:1099  | Gadd45g    | INSIDE                 | 0.478                                           | 0.402                            | 1902.56             | 765.41              | 0.192                            | 1503.63             | 288.92              |
| A_68_P23973155 | chr5:109058342-109058386                          | NM_153569:394   | Gak        | INSIDE                 | 0.273                                           | 0.621                            | 1598.27             | 991.75              | 0.169                            | 1173.02             | 198.75              |
| A_68_P23973156 | chr5:109058413-109058457                          | NM_153569:324   | Gak        | INSIDE                 | 0.519                                           | 0.606                            | 4363.22             | 2646.10             | 0.315                            | 3148.67             | 991.30              |
| A_68_P28669119 | chr12:99497006-99497050                           | NM_008079:519   | Galc       | INSIDE                 | 0.341                                           | 0.571                            | 927.29              | 529.74              | 0.195                            | 704.18              | 137.34              |
| A_68_P23331442 | chr4:135519710-135519754                          | NM_178389:-1347 | Gale       | PROMOTER               | 0.164                                           | 0.634                            | 4490.02             | 2844.55             | 0.104                            | 2903.65             | 301.49              |
| A_68_P28156837 | chr11:115873664-115873708                         | NM_016905:347   | Galk1      | INSIDE                 | 0.303                                           | 0.558                            | 1834.42             | 1024.51             | 0.169                            | 1392.43             | 235.32              |
| A_68_P31559063 | chr18:24365030-24365074                           | NM_00116040:558 | Galnt1     | INSIDE                 | 0.122                                           | 0.448                            | 2673.05             | 1196.27             | 0.055                            | 2135.21             | 116.59              |
| A_68_P27826626 | chr11:57458476-57458520                           | NM_134189:-445  | Galnt10    | PROMOTER               | 0.324                                           | 0.668                            | 1176.19             | 786.21              | 0.217                            | 976.16              | 211.69              |
| A_68_P27826627 | chr11:57458543-57458587                           | NM_134189:-379  | Galnt10    | PROMOTER               | 0.238                                           | 0.571                            | 1133.39             | 647.50              | 0.136                            | 886.24              | 120.53              |
| A_68_P27826629 | chr11:57458793-57458837                           | NM_134189:-129  | Galnt10    | PROMOTER               | 0.400                                           | 0.608                            | 3664.79             | 2229.96             | 0.244                            | 2544.15             | 619.66              |
| A_68_P22892660 | chr4:47105120-47105164                            | NM_172693:318   | Galnt12    | INSIDE                 | 0.470                                           | 0.618                            | 991.77              | 612.74              | 0.290                            | 756.44              | 219.62              |
| A_68_P21229090 | chr2:54288809-54288853                            | NM_173030:33    | Galnt13    | INSIDE                 | 0.537                                           | 0.475                            | 2104.72             | 998.70              | 0.255                            | 1616.68             | 412.23              |
| A_68_P21229089 | chr2:54288691-54288735                            | NM_173030:-85   | Galnt13    | PROMOTER               | 0.668                                           | 0.640                            | 1762.61             | 1128.40             | 0.428                            | 1599.03             | 684.31              |
| A_68_P31347822 | chr17:74058856-74058900                           | NM_027864:913   | Galnt14    | INSIDE                 | 0.406                                           | 0.542                            | 1480.35             | 802.89              | 0.220                            | 1057.71             | 232.90              |
| A_68_P31347823 | chr17:74058995-74059039                           | NM_027864:775   | Galnt14    | INSIDE                 | 0.358                                           | 0.577                            | 2749.71             | 1586.43             | 0.207                            | 2015.92             | 416.95              |
| A_68_P31347824 | chr17:74059066-74059113                           | NM_027864:702   | Galnt14    | INSIDE                 | 0.056                                           | 2.589                            | 4127.46             | 10686.06            | 0.144                            | 2551.03             | 367.54              |
| A_68_P31347825 | chr17:74059155-74059199                           | NM_027864:615   | Galnt14    | INSIDE                 | 0.420                                           | 1.634                            | 7514.33             | 12275.01            | 0.686                            | 4948.64             | 3394.20             |
| A_68_P26244129 | chr8:126756057-126756101                          | NM_139272:785   | Galnt2     | INSIDE                 | 0.362                                           | 0.568                            | 2036.88             | 1156.20             | 0.205                            | 1543.13             | 317.06              |

| ProbeName      | Target position of probe on CpG island microarray | TargetID           | GeneSymbol | CpG island Description | Ratio of relative methylation (TiO2-NP/Vehicle) | Sham group                       |                     |                     | TiO <sub>2</sub> -H group        |                     |                     |
|----------------|---------------------------------------------------|--------------------|------------|------------------------|-------------------------------------------------|----------------------------------|---------------------|---------------------|----------------------------------|---------------------|---------------------|
|                |                                                   |                    |            |                        |                                                 | Relative methylation (Cy-5/Cy-3) | Cy-3 signal (Input) | Cy-5 signal (MeDIP) | Relative methylation (Cy-5/Cy-3) | Cy-3 signal (Input) | Cy-5 signal (MeDIP) |
| A_68_P26244130 | chr8:126756129-126756173                          | NM_139272:857      | Galnt2     | INSIDE                 | 0.244                                           | 0.534                            | 1334.06             | 711.97              | 0.130                            | 917.18              | 119.50              |
| A_68_P30487410 | chr15:100559585-100559629                         | NM_001161768:-8698 | Galnt6     | PROMOTER               | 0.418                                           | 0.526                            | 1537.56             | 808.37              | 0.220                            | 1232.61             | 271.10              |
| A_68_P30487413 | chr15:100559897-100559941                         | NM_001161767:-1111 | Galnt6     | PROMOTER               | 0.494                                           | 0.518                            | 2203.93             | 1142.41             | 0.256                            | 1760.26             | 450.33              |
| A_68_P25892523 | chr8:60131751-60131795                            | NM_001167981:80    | Galnt7     | INSIDE                 | 0.472                                           | 0.557                            | 2676.26             | 1490.97             | 0.263                            | 2155.19             | 566.67              |
| A_68_P31876066 | chr18:82575283-82575327                           | NM_008082:865      | Galr1      | INSIDE                 | 0.479                                           | 0.483                            | 2065.44             | 997.01              | 0.231                            | 1600.25             | 370.27              |
| A_68_P31876071 | chr18:82575755-82575799                           | NM_008082:393      | Galr1      | INSIDE                 | 0.316                                           | 0.578                            | 2794.97             | 1614.79             | 0.182                            | 2046.50             | 373.42              |
| A_68_P31876072 | chr18:82575840-82575884                           | NM_008082:307      | Galr1      | INSIDE                 | 0.274                                           | 0.550                            | 2060.59             | 1133.84             | 0.151                            | 1520.48             | 229.52              |
| A_68_P28158431 | chr11:116142573-116142617                         | NM_010254:342      | Galr2      | INSIDE                 | 0.363                                           | 0.476                            | 1565.55             | 745.74              | 0.173                            | 1209.65             | 208.96              |
| A_68_P28158433 | chr11:116142782-116142826                         | NM_010254:552      | Galr2      | INSIDE                 | 0.522                                           | 0.699                            | 1461.04             | 1020.97             | 0.365                            | 1225.86             | 447.11              |
| A_68_P28158434 | chr11:116142875-116142919                         | NM_010254:644      | Galr2      | INSIDE                 | 0.628                                           | 0.435                            | 1715.76             | 745.91              | 0.273                            | 1323.62             | 361.38              |
| A_68_P28158435 | chr11:116142974-116143018                         | NM_010254:744      | Galr2      | INSIDE                 | 0.329                                           | 0.538                            | 3090.76             | 1662.50             | 0.177                            | 2339.73             | 414.36              |
| A_68_P28158436 | chr11:116143049-116143093                         | NM_010254:818      | Galr2      | INSIDE                 | 0.341                                           | 0.630                            | 1348.14             | 848.69              | 0.215                            | 926.83              | 199.12              |
| A_68_P28158445 | chr11:116144132-116144186                         | NM_010254:1906     | Galr2      | INSIDE                 | 0.018                                           | 2.351                            | 4288.22             | 10083.10            | 0.043                            | 2941.95             | 125.80              |
| A_68_P28158447 | chr11:116144333-116144377                         | NM_010254:2102     | Galr2      | INSIDE                 | 0.165                                           | 0.541                            | 1652.92             | 894.54              | 0.089                            | 1276.44             | 113.98              |
| A_68_P28158449 | chr11:116144557-116144601                         | NM_010254:2326     | Galr2      | INSIDE                 | 0.287                                           | 0.402                            | 1510.04             | 606.34              | 0.115                            | 1072.64             | 123.66              |
| A_68_P30364009 | chr15:78873840-78873884                           | NM_015738:1548     | Galr3      | INSIDE                 | 0.289                                           | 0.709                            | 2482.84             | 1759.91             | 0.205                            | 1813.34             | 372.01              |
| A_68_P22864172 | chr4:41702487-41702531                            | NM_016658:383      | Galt       | INSIDE                 | 0.511                                           | 0.631                            | 2104.90             | 1329.09             | 0.323                            | 1595.48             | 515.14              |
| A_68_P27282039 | chr10:79723618-79723662                           | NM_010255:73       | Gamt       | INSIDE                 | 0.624                                           | 0.614                            | 1077.94             | 662.22              | 0.383                            | 887.24              | 339.90              |
| A_68_P27282040 | chr10:79723724-79723768                           | NM_010255:-33      | Gamt       | DIVERGENT_PROMOTER     | 0.549                                           | 0.456                            | 3792.04             | 1728.04             | 0.250                            | 2988.07             | 747.36              |
| A_68_P27282041 | chr10:79723845-79723889                           | NM_010255:-153     | Gamt       | DIVERGENT_PROMOTER     | 0.608                                           | 0.660                            | 1685.06             | 1111.51             | 0.401                            | 1312.24             | 526.41              |
| A_68_P26200994 | chr8:119681587-119681631                          | NM_001081151:-426  | Gan        | PROMOTER               | 0.264                                           | 0.514                            | 1034.07             | 531.36              | 0.136                            | 861.90              | 117.07              |
| A_68_P21575069 | chr2:120229642-120229686                          | NM_172672:33       | Ganc       | INSIDE                 | 0.166                                           | 0.594                            | 2214.61             | 1315.25             | 0.098                            | 1757.52             | 172.83              |
| A_68_P24819099 | chr6:125114766-125114820                          | NM_008084:809      | Gapdh      | INSIDE                 | 0.144                                           | 0.713                            | 1595.12             | 1137.65             | 0.103                            | 1135.74             | 116.87              |
| A_68_P24819105 | chr6:125115461-125115505                          | NM_008084:119      | Gapdh      | INSIDE                 | 0.268                                           | 0.720                            | 6768.06             | 4873.16             | 0.193                            | 4535.51             | 873.94              |
| A_68_P25033089 | chr7:31514898-31514944                            | NM_008085:9455     | Gapdhs     | INSIDE                 | 0.238                                           | 0.571                            | 1186.52             | 677.36              | 0.136                            | 875.44              | 118.81              |
| A_68_P21129593 | chr2:34609363-34609407                            | NM_025709:1368     | Gapvd1     | INSIDE                 | 0.548                                           | 0.546                            | 3536.90             | 1930.95             | 0.299                            | 2825.39             | 844.86              |
| A_68_P22522345 | chr3:129533741-129533785                          | NM_026578:552      | Gar1       | INSIDE                 | 0.347                                           | 0.613                            | 2300.94             | 1410.15             | 0.212                            | 1679.40             | 356.72              |
| A_68_P22522346 | chr3:129533887-129533931                          | NM_026578:406      | Gar1       | INSIDE                 | 0.405                                           | 0.598                            | 2284.02             | 1365.84             | 0.242                            | 1847.04             | 446.89              |
| A_68_P24466829 | chr6:54988330-54988374                            | NM_180678:358      | Gars       | INSIDE                 | 0.435                                           | 0.550                            | 2430.92             | 1338.08             | 0.239                            | 1941.61             | 464.96              |
| A_68_P29083946 | chr13:60278080-60278124                           | NM_008086:794      | Gas1       | INSIDE                 | 0.647                                           | 2.797                            | 346.02              | 967.97              | 1.810                            | 347.89              | 629.57              |
| A_68_P27561149 | chr11:4961389-4961433                             | NM_001190406:3920  | Gas211     | INSIDE                 | 0.601                                           | 0.560                            | 2634.12             | 1474.41             | 0.337                            | 2254.87             | 758.77              |
| A_68_P27561155 | chr11:4962120-4962164                             | NM_001190406:3188  | Gas211     | INSIDE                 | 0.319                                           | 0.639                            | 1889.53             | 1208.16             | 0.204                            | 1423.13             | 290.20              |
| A_68_P27561172 | chr11:4963946-4963990                             | NM_001190406:1362  | Gas211     | INSIDE                 | 0.342                                           | 1.478                            | 1500.20             | 2217.22             | 0.505                            | 1179.52             | 596.05              |
| A_68_P20769690 | chr1:162964920-162964964                          | NR_002840:-354     | Gas5       | DIVERGENT_PROMOTER     | 0.288                                           | 0.565                            | 4380.48             | 2475.69             | 0.163                            | 3082.19             | 500.88              |
| A_68_P25668519 | chr8:13468177-13468227                            | NM_019521:26333    | Gas6       | INSIDE                 | 0.545                                           | 2.755                            | 986.63              | 2718.03             | 1.502                            | 664.35              | 997.76              |
| A_68_P25668520 | chr8:13468316-13468360                            | NM_019521:26197    | Gas6       | INSIDE                 | 0.609                                           | 2.535                            | 1674.75             | 4245.58             | 1.545                            | 1151.97             | 1779.25             |
| A_68_P25668725 | chr8:13494426-13494470                            | NM_019521:87       | Gas6       | INSIDE                 | 0.382                                           | 0.445                            | 3011.25             | 1340.42             | 0.170                            | 2228.70             | 379.31              |
| A_68_P24620284 | chr6:88140062-88140106                            | NM_008090:-8573    | Gata2      | PROMOTER               | 0.623                                           | 0.709                            | 1936.62             | 1372.21             | 0.441                            | 1468.86             | 648.11              |
| A_68_P24620285 | chr6:88140131-88140179                            | NM_008090:-8503    | Gata2      | PROMOTER               | 0.468                                           | 0.648                            | 2131.57             | 1381.31             | 0.303                            | 1653.83             | 501.27              |
| A_68_P24620291 | chr6:88140777-88140827                            | NM_008090:-7855    | Gata2      | PROMOTER               | 0.140                                           | 2.317                            | 2466.70             | 5716.21             | 0.325                            | 1622.65             | 527.89              |
| A_68_P24620313 | chr6:88143671-88143715                            | NM_008090:-4965    | Gata2      | PROMOTER               | 0.643                                           | 0.694                            | 1209.74             | 839.92              | 0.446                            | 872.92              | 389.45              |
| A_68_P24620314 | chr6:88143770-88143814                            | NM_008090:-4865    | Gata2      | PROMOTER               | 0.376                                           | 0.539                            | 2269.98             | 1224.54             | 0.203                            | 1815.15             | 368.02              |
| A_68_P24620341 | chr6:88146759-88146803                            | NM_008090:-1877    | Gata2      | PROMOTER               | 0.337                                           | 0.552                            | 923.90              | 510.19              | 0.186                            | 654.05              | 121.79              |
| A_68_P24620356 | chr6:88148509-88148553                            | NM_008090:-127     | Gata2      | PROMOTER               | 0.419                                           | 0.469                            | 1442.64             | 676.95              | 0.197                            | 1340.33             | 263.69              |

| ProbeName      | Target position of probe on CpG island microarray | TargetID          | GeneSymbol | CpG island Description | Ratio of relative methylation (TiO2-NP/Vehicle) | Sham group                       |                     |                     | TiO <sub>2</sub> -H group        |                     |                     |
|----------------|---------------------------------------------------|-------------------|------------|------------------------|-------------------------------------------------|----------------------------------|---------------------|---------------------|----------------------------------|---------------------|---------------------|
|                |                                                   |                   |            |                        |                                                 | Relative methylation (Cy-5/Cy-3) | Cy-3 signal (Input) | Cy-5 signal (MeDIP) | Relative methylation (Cy-5/Cy-3) | Cy-3 signal (Input) | Cy-5 signal (MeDIP) |
| A_68_P24620360 | chr6:88148968-88149012                            | NM_008090:333     | Gata2      | INSIDE                 | 0.404                                           | 0.683                            | 2322.07             | 1585.49             | 0.276                            | 1713.63             | 472.62              |
| A_68_P20997432 | chr2:9796607-9796655                              | NM_008091:3597    | Gata3      | INSIDE                 | 0.123                                           | 1.582                            | 3687.92             | 5833.72             | 0.195                            | 2669.74             | 519.95              |
| A_68_P29660083 | chr14:63864272-63864316                           | NM_008092:-197    | Gata4      | PROMOTER               | 0.275                                           | 0.528                            | 3707.11             | 1958.58             | 0.145                            | 2991.53             | 434.68              |
| A_68_P29660085 | chr14:63864436-63864480                           | NM_008092:-361    | Gata4      | PROMOTER               | 0.514                                           | 0.597                            | 1016.09             | 606.78              | 0.307                            | 842.41              | 258.44              |
| A_68_P29660137 | chr14:63870430-63870474                           | NM_008092:-6355   | Gata4      | PROMOTER               | 0.327                                           | 0.660                            | 2536.61             | 1675.09             | 0.216                            | 1862.65             | 402.08              |
| A_68_P29660138 | chr14:63870620-63870670                           | NM_008092:-6547   | Gata4      | PROMOTER               | 0.204                                           | 0.546                            | 1439.97             | 785.91              | 0.111                            | 1087.14             | 120.86              |
| A_68_P21903066 | chr2:180068973-180069017                          | NM_008093:390     | Gata5      | INSIDE                 | 0.165                                           | 0.604                            | 1416.62             | 855.66              | 0.099                            | 1186.31             | 117.92              |
| A_68_P21903068 | chr2:180069255-180069300                          | NM_008093:107     | Gata5      | INSIDE                 | 0.439                                           | 0.542                            | 1319.22             | 715.58              | 0.238                            | 976.06              | 232.35              |
| A_68_P31493012 | chr18:11048533-11048577                           | NM_010258:-3953   | Gata6      | PROMOTER               | 0.639                                           | 0.605                            | 1283.71             | 777.13              | 0.387                            | 1095.99             | 423.72              |
| A_68_P31493048 | chr18:11053045-11053099                           | NM_010258:565     | Gata6      | INSIDE                 | 0.134                                           | 0.629                            | 2098.04             | 1318.64             | 0.084                            | 1449.86             | 122.10              |
| A_68_P31493068 | chr18:11055096-11055140                           | NM_010258:2611    | Gata6      | INSIDE                 | 0.308                                           | 0.658                            | 1794.84             | 1180.78             | 0.203                            | 1390.45             | 281.95              |
| A_68_P23446277 | chr5:3647175-3647234                              | NM_026033:732     | Gatad1     | INSIDE                 | 0.263                                           | 0.480                            | 1156.23             | 555.11              | 0.126                            | 942.21              | 118.86              |
| A_68_P25949228 | chr8:72520400-72520444                            | NM_001113345:-144 | Gatad2a    | PROMOTER               | 0.408                                           | 0.489                            | 2940.06             | 1438.94             | 0.200                            | 2316.97             | 463.12              |
| A_68_P25949229 | chr8:72520506-72520550                            | NM_001113345:-250 | Gatad2a    | PROMOTER               | 0.323                                           | 0.338                            | 3200.59             | 1082.52             | 0.109                            | 2626.20             | 286.70              |
| A_68_P25949230 | chr8:72520586-72520630                            | NM_001113345:-330 | Gatad2a    | PROMOTER               | 0.663                                           | 0.589                            | 1082.30             | 637.93              | 0.391                            | 865.19              | 338.15              |
| A_68_P21587096 | chr2:122436805-122436849                          | NM_025961:187     | Gatm       | INSIDE                 | 0.578                                           | 0.637                            | 1149.79             | 732.57              | 0.368                            | 992.33              | 365.34              |
| A_68_P22872581 | chr4:43591992-43592036                            | NM_172692:-278    | Gba2       | PROMOTER               | 0.279                                           | 0.667                            | 1750.32             | 1166.84             | 0.186                            | 1386.88             | 258.22              |
| A_68_P30849202 | chr16:70314865-70314917                           | NM_028803:559     | Gbe1       | INSIDE                 | 0.162                                           | 0.642                            | 1707.73             | 1097.06             | 0.104                            | 1161.22             | 120.54              |
| A_68_P20432928 | chr1:91819533-91819577                            | NM_010262:8197    | Gbx2       | DOWNSTREAM             | 0.448                                           | 0.565                            | 3982.53             | 2251.11             | 0.253                            | 3110.31             | 787.09              |
| A_68_P20432979 | chr1:91825300-91825344                            | NM_010262:2429    | Gbx2       | INSIDE                 | 0.243                                           | 0.575                            | 1071.25             | 616.12              | 0.140                            | 893.18              | 124.67              |
| A_68_P20433001 | chr1:91827813-91827857                            | NM_010262:-83     | Gbx2       | PROMOTER               | 0.640                                           | 0.642                            | 1031.45             | 662.60              | 0.411                            | 724.71              | 297.74              |
| A_68_P30363918 | chr5:78861120-78861164                            | NM_013847:-161    | Gcat       | PROMOTER               | 0.541                                           | 0.470                            | 2274.42             | 1068.97             | 0.254                            | 1734.85             | 441.01              |
| A_68_P28185092 | chr11:120392138-120392182                         | NM_008101:120     | Gcgr       | INSIDE                 | 0.329                                           | 0.476                            | 2115.77             | 1007.90             | 0.157                            | 1706.84             | 267.17              |
| A_68_P27565570 | chr11:5802331-5802375                             | NM_010292:47250   | Gck        | INSIDE                 | 0.628                                           | 0.650                            | 837.86              | 544.37              | 0.408                            | 744.34              | 303.83              |
| A_68_P31985484 | chr19:17430865-17430909                           | NM_173442:271     | Gcnt1      | INSIDE                 | 0.444                                           | 0.580                            | 1236.59             | 717.45              | 0.258                            | 1024.58             | 263.86              |
| A_68_P29248565 | chr13:97695108-97695152                           | NM_001166065:487  | Gcnt4      | INSIDE                 | 0.264                                           | 0.497                            | 2107.56             | 1047.39             | 0.131                            | 1876.41             | 246.08              |
| A_68_P21812431 | chr2:163264311-163264355                          | NM_144891:130     | Gdap111    | INSIDE                 | 0.525                                           | 0.540                            | 1278.39             | 690.65              | 0.283                            | 1056.04             | 299.37              |
| A_68_P22367900 | chr3:99966673-99966717                            | NM_010269:254     | Gdap2      | INSIDE                 | 0.373                                           | 0.604                            | 1259.37             | 760.79              | 0.225                            | 960.25              | 216.33              |
| A_68_P27543728 | chr10:128328158-128328202                         | NM_010272:594     | Gdf11      | INSIDE                 | 0.614                                           | 0.713                            | 2342.09             | 1668.76             | 0.437                            | 1895.11             | 828.69              |
| A_68_P22722574 | chr4:9787244-9787288                              | NM_013526:15748   | Gdf6       | INSIDE                 | 0.417                                           | 0.641                            | 1027.55             | 658.62              | 0.267                            | 864.10              | 230.94              |
| A_68_P28221291 | chr12:8304878-8304922                             | NM_013527:3860    | Gdf7       | INSIDE                 | 0.421                                           | 0.586                            | 3303.52             | 1935.60             | 0.247                            | 2268.27             | 559.55              |
| A_68_P28221292 | chr12:8305005-8305049                             | NM_013527:3734    | Gdf7       | INSIDE                 | 0.240                                           | 0.471                            | 3100.53             | 1461.60             | 0.113                            | 2033.55             | 230.54              |
| A_68_P28221299 | chr12:8305679-8305723                             | NM_013527:3060    | Gdf7       | INSIDE                 | 0.551                                           | 0.562                            | 1176.39             | 661.38              | 0.310                            | 942.05              | 291.95              |
| A_68_P28221328 | chr12:8308980-8309024                             | NM_013527:-242    | Gdf7       | PROMOTER               | 0.178                                           | 0.566                            | 1528.93             | 864.66              | 0.101                            | 1200.00             | 120.75              |
| A_68_P28788493 | chr13:3537834-3537878                             | NM_008112:536     | Gdi2       | INSIDE                 | 0.384                                           | 0.541                            | 1387.53             | 751.02              | 0.208                            | 1088.91             | 226.22              |
| A_68_P29996485 | chr15:7761244-7761297                             | NM_010275:260     | Gdnf       | INSIDE                 | 0.237                                           | 0.607                            | 1081.00             | 655.95              | 0.144                            | 811.07              | 116.54              |
| A_68_P29996501 | chr15:7762967-7763011                             | NM_010275:1978    | Gdnf       | INSIDE                 | 0.489                                           | 0.364                            | 2461.17             | 895.06              | 0.178                            | 1707.36             | 303.57              |
| A_68_P29996526 | chr15:7765753-7765797                             | NM_010275:4764    | Gdnf       | INSIDE                 | 0.395                                           | 0.703                            | 1521.03             | 1069.87             | 0.278                            | 1204.55             | 334.90              |
| A_68_P25361477 | chr7:106530129-106530173                          | NM_201352:92      | Gdpd5      | INSIDE                 | 0.583                                           | 0.713                            | 4847.48             | 3456.02             | 0.415                            | 3705.98             | 1539.77             |
| A_68_P25361482 | chr7:106530807-106530853                          | NM_201352:772     | Gdpd5      | INSIDE                 | 0.403                                           | 1.577                            | 1363.77             | 2150.15             | 0.636                            | 979.45              | 622.45              |
| A_68_P24994093 | chr7:20158292-20158342                            | NM_027189:376     | Gemin7     | INSIDE                 | 0.217                                           | 0.433                            | 1744.46             | 755.51              | 0.094                            | 1311.11             | 123.25              |
| A_68_P24994095 | chr7:20158628-20158672                            | NM_027189:42      | Gemin7     | INSIDE                 | 0.377                                           | 0.684                            | 3085.38             | 2111.39             | 0.258                            | 2288.35             | 590.73              |
| A_68_P28082093 | chr11:102754576-102754620                         | NM_010277:3916    | Gflap      | INSIDE                 | 0.189                                           | 0.441                            | 1791.23             | 789.73              | 0.084                            | 1385.42             | 115.70              |
| A_68_P23968407 | chr5:108150057-108150101                          | NM_010278:3285    | Gfi1       | INSIDE                 | 0.248                                           | 0.524                            | 1114.27             | 583.38              | 0.130                            | 902.75              | 117.05              |

| ProbeName      | Target position of probe on CpG island microarray | TargetID          | GeneSymbol | CpG island Description | Ratio of relative methylation (TiO2-NP/Vehicle) | Sham group                       |                     |                     | TiO <sub>2</sub> -H group        |                     |                     |
|----------------|---------------------------------------------------|-------------------|------------|------------------------|-------------------------------------------------|----------------------------------|---------------------|---------------------|----------------------------------|---------------------|---------------------|
|                |                                                   |                   |            |                        |                                                 | Relative methylation (Cy-5/Cy-3) | Cy-3 signal (Input) | Cy-5 signal (MeDIP) | Relative methylation (Cy-5/Cy-3) | Cy-3 signal (Input) | Cy-5 signal (MeDIP) |
| A_68_P23968409 | chr5:108150354-108150398                          | NM_010278:2987    | Gfi1       | INSIDE                 | 0.368                                           | 0.440                            | 2694.53             | 1186.86             | 0.162                            | 2359.37             | 381.96              |
| A_68_P23968432 | chr5:108150307-108150381                          | NM_010278:305     | Gfi1       | INSIDE                 | 0.366                                           | 0.652                            | 2715.19             | 1770.48             | 0.239                            | 2039.13             | 486.52              |
| A_68_P23968440 | chr5:108154062-108154106                          | NM_010278:-721    | Gfi1       | PROMOTER               | 0.625                                           | 0.488                            | 1271.79             | 620.83              | 0.305                            | 1042.16             | 317.71              |
| A_68_P23968443 | chr5:108154493-108154537                          | NM_010278:-1151   | Gfi1       | PROMOTER               | 0.287                                           | 0.572                            | 2172.92             | 1242.44             | 0.164                            | 1848.78             | 303.22              |
| A_68_P23968445 | chr5:108154656-108154700                          | NM_010278:-1315   | Gfi1       | PROMOTER               | 0.219                                           | 0.620                            | 1078.97             | 668.62              | 0.136                            | 848.09              | 115.35              |
| A_68_P23968446 | chr5:108154743-108154789                          | NM_010278:-1403   | Gfi1       | PROMOTER               | 0.197                                           | 0.423                            | 1821.50             | 770.49              | 0.083                            | 1481.81             | 123.26              |
| A_68_P23968454 | chr5:108155866-108155910                          | NM_010278:-2525   | Gfi1       | PROMOTER               | 0.182                                           | 0.589                            | 2544.34             | 1497.52             | 0.107                            | 1957.54             | 210.20              |
| A_68_P23968410 | chr5:108150495-108150539                          | NM_010278:2847    | Gfi1       | INSIDE                 | 0.669                                           | 0.649                            | 1001.29             | 649.95              | 0.434                            | 891.94              | 387.34              |
| A_68_P29249639 | chr13:97908050-97908094                           | NM_177266:181     | Gfm2       | INSIDE                 | 0.416                                           | 0.475                            | 1662.26             | 789.34              | 0.197                            | 1181.89             | 233.24              |
| A_68_P28989502 | chr13:43398690-43398734                           | NM_001033399:829  | Gfod1      | INSIDE                 | 0.296                                           | 0.541                            | 2800.65             | 1514.17             | 0.160                            | 1873.14             | 299.96              |
| A_68_P28989503 | chr13:43398780-43398824                           | NM_001033399:739  | Gfod1      | INSIDE                 | 0.460                                           | 0.576                            | 954.66              | 549.71              | 0.265                            | 777.04              | 205.71              |
| A_68_P26135758 | chr8:108282379-108282423                          | NM_027469:107     | Gfod2      | INSIDE                 | 0.454                                           | 0.610                            | 1234.17             | 753.37              | 0.277                            | 938.18              | 259.84              |
| A_68_P27784885 | chr11:49607988-49608032                           | NM_013529:354     | Gfpt2      | INSIDE                 | 0.132                                           | 0.724                            | 2312.34             | 1674.19             | 0.095                            | 1774.82             | 169.11              |
| A_68_P27784886 | chr11:49608055-49608100                           | NM_013529:421     | Gfpt2      | INSIDE                 | 0.180                                           | 0.638                            | 2029.21             | 1294.67             | 0.115                            | 1681.83             | 192.78              |
| A_68_P27784888 | chr11:49608283-49608327                           | NM_013529:648     | Gfpt2      | INSIDE                 | 0.505                                           | 0.482                            | 1537.48             | 740.55              | 0.243                            | 1337.59             | 325.21              |
| A_68_P32213509 | chr19:58528941-58528985                           | NM_010279:-6      | Gfra1      | PROMOTER               | 0.318                                           | 0.585                            | 1261.52             | 738.16              | 0.186                            | 986.24              | 183.24              |
| A_68_P32213510 | chr19:58529067-58529111                           | NM_010279:-132    | Gfra1      | PROMOTER               | 0.263                                           | 0.492                            | 1248.19             | 614.02              | 0.129                            | 922.96              | 119.40              |
| A_68_P32213514 | chr19:58529502-58529546                           | NM_010279:-568    | Gfra1      | PROMOTER               | 0.156                                           | 0.544                            | 2506.69             | 1362.64             | 0.085                            | 1910.18             | 161.47              |
| A_68_P32213516 | chr19:58529694-58529738                           | NM_010279:-760    | Gfra1      | PROMOTER               | 0.552                                           | 0.699                            | 3599.35             | 2514.57             | 0.386                            | 2391.78             | 922.06              |
| A_68_P29703998 | chr14:71290922-71290966                           | NM_008115:1008    | Gfra2      | INSIDE                 | 0.342                                           | 0.467                            | 2053.29             | 958.58              | 0.160                            | 1567.16             | 250.28              |
| A_68_P31614303 | chr18:34879926-34879970                           | NM_010280:93      | Gfra3      | INSIDE                 | 0.422                                           | 0.459                            | 2095.67             | 961.61              | 0.193                            | 1705.92             | 329.96              |
| A_68_P24466585 | chr6:54942609-54942653                            | NM_026637:231     | Ggct       | INSIDE                 | 0.524                                           | 0.482                            | 1086.83             | 523.50              | 0.252                            | 916.67              | 231.24              |
| A_68_P24466586 | chr6:54942741-54942785                            | NM_026637:99      | Ggct       | INSIDE                 | 0.204                                           | 0.428                            | 1823.74             | 781.34              | 0.088                            | 1331.71             | 116.65              |
| A_68_P22767952 | chr4:19968906-19968950                            | NM_010281:-270    | Ggh        | PROMOTER               | 0.460                                           | 0.505                            | 1565.98             | 790.84              | 0.232                            | 1284.93             | 298.32              |
| A_68_P22767953 | chr4:19968999-19969043                            | NM_010281:-178    | Ggh        | PROMOTER               | 0.421                                           | 0.429                            | 1570.69             | 673.59              | 0.181                            | 1388.11             | 250.57              |
| A_68_P25025742 | chr7:29956544-29956588                            | NM_182696:1158    | Ggn        | INSIDE                 | 0.379                                           | 0.497                            | 1466.17             | 729.41              | 0.189                            | 1024.49             | 193.18              |
| A_68_P25025744 | chr7:29956908-29956952                            | NM_182696:1522    | Ggn        | INSIDE                 | 0.233                                           | 0.510                            | 1654.80             | 844.00              | 0.119                            | 1331.23             | 158.23              |
| A_68_P27980049 | chr11:84683380-84683424                           | NM_153144:838     | Ggnbp2     | INSIDE                 | 0.177                                           | 0.632                            | 1488.84             | 941.06              | 0.112                            | 1155.09             | 129.12              |
| A_68_P28836952 | chr13:14155652-14155696                           | NM_010282:-6      | Ggps1      | DIVERGENT_PROMOTER     | 0.140                                           | 0.658                            | 2971.62             | 1956.18             | 0.092                            | 2215.76             | 203.63              |
| A_68_P21133753 | chr2:35317703-35317754                            | NM_001145821:-783 | Ggta1      | PROMOTER               | 0.217                                           | 0.610                            | 1035.25             | 631.88              | 0.133                            | 870.24              | 115.39              |
| A_68_P29543501 | chr14:37948355-37948400                           | NM_001199122:-52  | Ghitm      | PROMOTER               | 0.531                                           | 0.660                            | 1103.99             | 728.97              | 0.351                            | 924.81              | 324.34              |
| A_68_P29543502 | chr14:37948492-37948546                           | NM_078478:-10     | Ghitm      | PROMOTER               | 0.282                                           | 0.619                            | 908.79              | 562.64              | 0.175                            | 668.07              | 116.73              |
| A_68_P22010765 | chr3:27270773-27270817                            | NM_177330:522     | Ghsr       | INSIDE                 | 0.255                                           | 0.630                            | 5161.96             | 3250.36             | 0.161                            | 3663.81             | 589.33              |
| A_68_P22010766 | chr3:27270872-27270916                            | NM_177330:622     | Ghsr       | INSIDE                 | 0.565                                           | 0.694                            | 2020.63             | 1402.78             | 0.392                            | 1427.12             | 560.14              |
| A_68_P22010767 | chr3:27270950-27270994                            | NM_177330:700     | Ghsr       | INSIDE                 | 0.304                                           | 0.673                            | 2032.00             | 1367.20             | 0.205                            | 1465.99             | 299.92              |
| A_68_P22010769 | chr3:27271192-27271236                            | NM_177330:942     | Ghsr       | INSIDE                 | 0.278                                           | 0.629                            | 1416.27             | 890.73              | 0.175                            | 1126.14             | 197.20              |
| A_68_P22010771 | chr3:27271350-27271394                            | NM_177330:1100    | Ghsr       | INSIDE                 | 0.102                                           | 0.673                            | 3318.83             | 2235.15             | 0.069                            | 2148.80             | 147.41              |
| A_68_P22010772 | chr3:27271476-27271522                            | NM_177330:1226    | Ghsr       | INSIDE                 | 0.255                                           | 0.502                            | 1159.36             | 581.81              | 0.128                            | 899.87              | 114.94              |
| A_68_P20417066 | chr1:89223605-89223651                            | NM_001110212:25   | Gigyf2     | INSIDE                 | 0.268                                           | 0.607                            | 1552.15             | 942.01              | 0.163                            | 1281.53             | 208.77              |
| A_68_P24429122 | chr6:48693166-48693210                            | NM_008376:4143    | Gimap1     | INSIDE                 | 0.295                                           | 1.877                            | 2991.48             | 5614.39             | 0.554                            | 2024.80             | 1121.84             |
| A_68_P26221252 | chr8:123113160-123113204                          | NM_178856:-207    | Gins2      | PROMOTER               | 0.184                                           | 0.648                            | 1738.23             | 2033.78             | 0.119                            | 2273.75             | 271.27              |
| A_68_P26084323 | chr8:98157470-98157514                            | NM_030198:34      | Gins3      | INSIDE                 | 0.490                                           | 0.644                            | 1796.46             | 1157.20             | 0.316                            | 1431.88             | 452.09              |
| A_68_P25715599 | chr8:24348136-24348180                            | NM_024240:-18     | Gins4      | PROMOTER               | 0.595                                           | 0.634                            | 1208.93             | 765.98              | 0.377                            | 871.37              | 328.63              |
| A_68_P22649021 | chr3:151828589-151828633                          | NM_016867:254     | Gipc2      | INSIDE                 | 0.643                                           | 0.612                            | 1020.89             | 625.26              | 0.394                            | 880.87              | 347.06              |



| ProbeName      | Target position of probe on CpG island microarray | TargetID           | GeneSymbol | CpG island Description | Ratio of relative methylation (TiO2-NP/Vehicle) | Sham group                       |                     |                     | TiO <sub>2</sub> -H group        |                     |                     |
|----------------|---------------------------------------------------|--------------------|------------|------------------------|-------------------------------------------------|----------------------------------|---------------------|---------------------|----------------------------------|---------------------|---------------------|
|                |                                                   |                    |            |                        |                                                 | Relative methylation (Cy-5/Cy-3) | Cy-3 signal (Input) | Cy-5 signal (MeDIP) | Relative methylation (Cy-5/Cy-3) | Cy-3 signal (Input) | Cy-5 signal (MeDIP) |
| A_68_P27937914 | chr11:77306484-77306528                           | NM_001004144:407   | Git1       | DIVERGENT_PROMOTER     | 0.163                                           | 0.318                            | 3524.28             | 1120.61             | 0.052                            | 2433.98             | 126.21              |
| A_68_P24005878 | chr5:115199611-115199670                          | NM_001077360:23860 | Git2       | INSIDE                 | 0.588                                           | 3.829                            | 817.22              | 3129.23             | 2.252                            | 735.92              | 1657.63             |
| A_68_P29625860 | chr14:57676319-57676363                           | NM_016975:442      | Gja3       | INSIDE                 | 0.339                                           | 0.516                            | 1227.11             | 632.98              | 0.175                            | 1065.22             | 186.06              |
| A_68_P23284717 | chr4:127003796-127003840                          | NM_008126:2551     | Gjb3       | INSIDE                 | 0.545                                           | 4.401                            | 2507.42             | 11034.19            | 2.398                            | 1882.09             | 4513.55             |
| A_68_P27835269 | chr11:58990423-58990467                           | NM_175452:5884     | Gje2       | INSIDE                 | 0.188                                           | 0.538                            | 1437.85             | 773.29              | 0.101                            | 1179.38             | 119.00              |
| A_68_P28059766 | chr11:98844320-98844364                           | NM_178596:-12      | Gjd3       | PROMOTER               | 0.240                                           | 0.634                            | 2659.07             | 1686.37             | 0.152                            | 1969.80             | 299.66              |
| A_68_P29072412 | chr13:58376159-58376204                           | NM_019832:-632     | Gkap1      | PROMOTER               | 0.276                                           | 1.706                            | 2038.90             | 3477.83             | 0.471                            | 1472.02             | 693.44              |
| A_68_P26844443 | chr9:114310274-114310318                          | NM_009752:60       | Glb1       | INSIDE                 | 0.085                                           | 0.667                            | 4000.44             | 2667.31             | 0.056                            | 3204.12             | 180.90              |
| A_68_P24226572 | chr6:8459387-8459431                              | NM_133236:-187     | Gleci1     | PROMOTER               | 0.329                                           | 0.407                            | 1976.94             | 804.00              | 0.134                            | 1662.49             | 222.59              |
| A_68_P32056973 | chr19:30249514-30249558                           | NM_138595:372      | Gldc       | INSIDE                 | 0.537                                           | 0.693                            | 1365.76             | 946.23              | 0.372                            | 1000.56             | 372.57              |
| A_68_P26167379 | chr8:113782539-113782583                          | NM_009149:542      | Glg1       | INSIDE                 | 0.141                                           | 0.394                            | 2867.48             | 1130.21             | 0.056                            | 2154.21             | 119.57              |
| A_68_P28842019 | chr13:15554706-15554754                           | NM_008130:-825     | Gli3       | PROMOTER               | 0.308                                           | 0.622                            | 874.17              | 544.10              | 0.191                            | 729.07              | 139.60              |
| A_68_P22874559 | chr4:43970296-43970340                            | NM_027450:-255     | Glipr2     | PROMOTER               | 0.496                                           | 0.559                            | 1771.03             | 989.51              | 0.277                            | 1386.07             | 383.78              |
| A_68_P22874562 | chr4:43970796-43970840                            | NM_027450:245      | Glipr2     | INSIDE                 | 0.203                                           | 0.687                            | 2370.98             | 1629.69             | 0.139                            | 1874.53             | 261.24              |
| A_68_P23190566 | chr4:107108029-107108073                          | NM_147221:727      | Glis1      | INSIDE                 | 0.377                                           | 1.478                            | 4788.96             | 7077.76             | 0.556                            | 3651.27             | 2031.75             |
| A_68_P32048646 | chr19:28752584-28752628                           | NM_175459:1961     | Glis3      | INSIDE                 | 0.345                                           | 0.616                            | 1558.16             | 960.44              | 0.212                            | 1266.66             | 269.05              |
| A_68_P28707019 | chr12:106271229-106271273                         | NM_028419:352      | Glx5       | INSIDE                 | 0.535                                           | 0.396                            | 1445.97             | 572.75              | 0.212                            | 1100.45             | 232.99              |
| A_68_P24078732 | chr5:128112557-128112601                          | NM_177005:-53      | Glt1d1     | PROMOTER               | 0.275                                           | 0.655                            | 2080.08             | 1363.22             | 0.180                            | 1648.89             | 296.76              |
| A_68_P24078733 | chr5:128112702-128112746                          | NM_177005:93       | Glt1d1     | INSIDE                 | 0.299                                           | 0.428                            | 1751.18             | 749.64              | 0.128                            | 1530.19             | 195.95              |
| A_68_P24078735 | chr5:128112945-128112989                          | NM_177005:335      | Glt1d1     | INSIDE                 | 0.154                                           | 0.586                            | 1799.84             | 1054.40             | 0.090                            | 1351.22             | 122.23              |
| A_68_P24078736 | chr5:128113050-128113094                          | NM_177005:441      | Glt1d1     | INSIDE                 | 0.168                                           | 0.527                            | 2456.25             | 1293.46             | 0.089                            | 1862.68             | 164.85              |
| A_68_P20720547 | chr1:154247487-154247531                          | NM_177756:512      | Glt25d2    | INSIDE                 | 0.532                                           | 0.630                            | 1331.51             | 838.96              | 0.335                            | 937.45              | 314.34              |
| A_68_P22299771 | chr3:85691284-85691328                            | NM_177130:134      | Glt28d2    | INSIDE                 | 0.542                                           | 0.544                            | 1148.12             | 624.12              | 0.295                            | 976.14              | 287.65              |
| A_68_P23441153 | chr4:155243478-155243522                          | NM_024472:49       | Gltpd1     | INSIDE                 | 0.496                                           | 0.652                            | 897.42              | 585.11              | 0.323                            | 694.65              | 224.60              |
| A_68_P29529255 | chr14:35124395-35124439                           | NM_008133:504      | Glud1      | INSIDE                 | 0.225                                           | 0.419                            | 1938.13             | 811.39              | 0.094                            | 1549.72             | 146.20              |
| A_68_P20729266 | chr1:155746790-155746834                          | NM_008131:-262     | Glul       | PROMOTER               | 0.659                                           | 0.418                            | 1419.85             | 593.41              | 0.276                            | 1090.54             | 300.51              |
| A_68_P30513459 | chr16:5049380-5049424                             | NM_001079814:601   | Glyr1      | INSIDE                 | 0.185                                           | 0.385                            | 2033.48             | 782.98              | 0.071                            | 1603.69             | 114.32              |
| A_68_P25947454 | chr8:71919340-71919384                            | NR_038043:81       | Gm10033    | INSIDE                 | 0.142                                           | 0.631                            | 1761.42             | 1111.03             | 0.090                            | 1309.54             | 117.36              |
| A_68_P24839024 | chr6:128388816-128388862                          | NR_028592:64       | Gm10069    | INSIDE                 | 0.128                                           | 0.586                            | 1903.76             | 1115.11             | 0.075                            | 1663.82             | 124.44              |
| A_68_P24839025 | chr6:128388883-128388942                          | NR_028592:138      | Gm10069    | INSIDE                 | 0.224                                           | 0.491                            | 1224.64             | 600.76              | 0.110                            | 1049.15             | 115.49              |
| A_68_P31469355 | chr18:5592249-5592293                             | NR_033552:165      | Gm10125    | INSIDE                 | 0.289                                           | 0.412                            | 1288.43             | 530.38              | 0.119                            | 982.72              | 116.95              |
| A_68_P30347360 | chr15:76124857-76124901                           | NM_001195537:15    | Gm10345    | INSIDE                 | 0.530                                           | 0.563                            | 1041.93             | 586.88              | 0.299                            | 872.91              | 260.61              |
| A_68_P30347361 | chr15:76124944-76124988                           | NM_001195537:103   | Gm10345    | INSIDE                 | 0.346                                           | 0.670                            | 2218.48             | 1486.76             | 0.232                            | 1701.76             | 394.89              |
| A_68_P28771929 | chr12:118392739-118392783                         | NR_033538:-3018    | Gm10421    | PROMOTER               | 0.518                                           | 0.513                            | 1032.45             | 529.89              | 0.266                            | 691.08              | 183.88              |
| A_68_P20941835 | chr1:193960556-193960600                          | NR_033536:-201     | Gm10516    | PROMOTER               | 0.599                                           | 0.631                            | 1911.71             | 1206.98             | 0.378                            | 1339.15             | 506.58              |
| A_68_P20941839 | chr1:193961046-193961090                          | NR_033536:289      | Gm10516    | INSIDE                 | 0.166                                           | 0.538                            | 4764.51             | 2565.43             | 0.090                            | 3621.27             | 324.58              |
| A_68_P25533778 | chr7:139507346-139507390                          | NR_028578:22       | Gm10584    | INSIDE                 | 0.275                                           | 0.483                            | 3417.22             | 1651.74             | 0.133                            | 2367.90             | 314.29              |
| A_68_P27267010 | chr10:76721714-76721758                           | NR_026944:232      | Gm10941    | INSIDE                 | 0.338                                           | 0.602                            | 1017.53             | 612.92              | 0.204                            | 810.65              | 165.13              |
| A_68_P31260063 | chr17:57245094-57245138                           | NR_033508:249      | Gm11110    | INSIDE                 | 0.159                                           | 0.691                            | 1609.13             | 1112.43             | 0.110                            | 1085.37             | 119.30              |
| A_68_P22346156 | chr3:95685923-95685967                            | NM_001033302:207   | Gm129      | INSIDE                 | 0.189                                           | 0.555                            | 2301.14             | 1276.79             | 0.105                            | 1761.90             | 184.70              |
| A_68_P22346159 | chr3:95686322-95686366                            | NM_001033302:-193  | Gm129      | PROMOTER               | 0.428                                           | 0.460                            | 1798.38             | 827.42              | 0.197                            | 1429.60             | 281.50              |
| A_68_P21565607 | chr2:118528199-118528243                          | NM_001081971:1479  | Gm1337     | INSIDE                 | 0.501                                           | 0.573                            | 2083.12             | 1193.66             | 0.287                            | 1618.38             | 464.29              |
| A_68_P21565608 | chr2:118528286-118528330                          | NM_001081971:1391  | Gm1337     | INSIDE                 | 0.282                                           | 0.716                            | 1588.94             | 1138.16             | 0.202                            | 1307.35             | 264.36              |
| A_68_P21565618 | chr2:118529436-118529480                          | NM_001081971:241   | Gm1337     | INSIDE                 | 0.442                                           | 0.518                            | 1582.95             | 819.92              | 0.229                            | 1202.22             | 275.24              |

| ProbeName      | Target position of probe on CpG island microarray | TargetID           | GeneSymbol | CpG island Description | Ratio of relative methylation (TiO2-NP/Vehicle) | Sham group                       |                     |                     | TiO <sub>2</sub> -H group        |                     |                     |
|----------------|---------------------------------------------------|--------------------|------------|------------------------|-------------------------------------------------|----------------------------------|---------------------|---------------------|----------------------------------|---------------------|---------------------|
|                |                                                   |                    |            |                        |                                                 | Relative methylation (Cy-5/Cy-3) | Cy-3 signal (Input) | Cy-5 signal (MeDIP) | Relative methylation (Cy-5/Cy-3) | Cy-3 signal (Input) | Cy-5 signal (MeDIP) |
| A_68_P21052789 | chr2:20890869-20890913                            | NR_033225:390      | Gm13375    | INSIDE                 | 0.352                                           | 0.551                            | 1205.68             | 664.22              | 0.194                            | 1039.22             | 201.53              |
| A_68_P21438061 | chr2:93796206-93796250                            | NM_001145034:1029  | Gm13889    | INSIDE                 | 0.545                                           | 0.646                            | 3243.11             | 2093.86             | 0.352                            | 2326.97             | 818.79              |
| A_68_P21438070 | chr2:93797249-93797293                            | NM_001145034:-13   | Gm13889    | PROMOTER               | 0.237                                           | 0.404                            | 1890.71             | 763.41              | 0.096                            | 1359.35             | 130.06              |
| A_68_P21569057 | chr2:119151750-119151794                          | NR_030683:161      | Gm14207    | INSIDE                 | 0.255                                           | 0.672                            | 2166.85             | 1456.50             | 0.172                            | 1612.44             | 276.87              |
| A_68_P21569058 | chr2:119151824-119151868                          | NR_030683:87       | Gm14207    | INSIDE                 | 0.387                                           | 0.398                            | 1735.41             | 690.56              | 0.154                            | 1256.20             | 193.45              |
| A_68_P21569059 | chr2:119151913-119151957                          | NR_030683:-1       | Gm14207    | PROMOTER               | 0.313                                           | 0.610                            | 2568.77             | 1565.77             | 0.191                            | 1984.18             | 378.63              |
| A_68_P25954808 | chr8:73421306-73421350                            | NM_001111116:-17   | Gm15427    | PROMOTER               | 0.191                                           | 0.562                            | 1680.38             | 945.20              | 0.107                            | 1153.92             | 123.99              |
| A_68_P28577473 | chr12:81859415-81859459                           | NM_001008423:2266  | Gm1568     | INSIDE                 | 0.603                                           | 3.825                            | 273.66              | 1046.71             | 2.308                            | 341.37              | 787.73              |
| A_68_P30588159 | chr16:20548466-20548510                           | NR_030670:141      | Gm15760    | INSIDE                 | 0.343                                           | 0.695                            | 1557.95             | 1083.45             | 0.238                            | 1066.30             | 254.19              |
| A_68_P24225086 | chr6:8209405-8209449                              | NR_033518:139      | Gm16039    | INSIDE                 | 0.113                                           | 0.622                            | 5268.18             | 3276.99             | 0.070                            | 3832.71             | 268.46              |
| A_68_P24225087 | chr6:8209485-8209529                              | NR_033518:219      | Gm16039    | INSIDE                 | 0.506                                           | 0.565                            | 2212.07             | 1250.54             | 0.286                            | 1747.95             | 500.35              |
| A_68_P27845445 | chr11:60727478-60727528                           | NM_025294:-208     | Gm16515    | PROMOTER               | 0.196                                           | 0.655                            | 1274.17             | 834.69              | 0.129                            | 946.32              | 121.66              |
| A_68_P27845563 | chr11:60744900-60744958                           | NR_027800:441      | Gm16516    | INSIDE                 | 0.218                                           | 0.557                            | 1399.94             | 779.86              | 0.121                            | 958.84              | 116.18              |
| A_68_P27845566 | chr11:60745169-60745219                           | NR_027800:175      | Gm16516    | INSIDE                 | 0.280                                           | 0.512                            | 1039.71             | 532.39              | 0.144                            | 807.31              | 115.86              |
| A_68_P27845568 | chr11:60745336-60745380                           | NR_027800:11       | Gm16516    | INSIDE                 | 0.202                                           | 0.424                            | 1765.82             | 749.44              | 0.086                            | 1337.97             | 114.76              |
| A_68_P27278157 | chr10:79132042-79132087                           | NM_148934:-90      | Gm16517    | PROMOTER               | 0.155                                           | 0.511                            | 1817.73             | 928.53              | 0.079                            | 1486.61             | 117.85              |
| A_68_P23591962 | chr5:34325727-34325771                            | NM_001033458:-374  | Gm1673     | PROMOTER               | 0.519                                           | 0.579                            | 1267.64             | 734.52              | 0.301                            | 1019.87             | 306.96              |
| A_68_P23591965 | chr5:34325967-34326011                            | NM_001033458:-134  | Gm1673     | PROMOTER               | 0.504                                           | 0.467                            | 1675.98             | 783.04              | 0.235                            | 1339.29             | 315.28              |
| A_68_P23591967 | chr5:34326256-34326300                            | NM_001033458:156   | Gm1673     | INSIDE                 | 0.323                                           | 0.440                            | 4056.81             | 1783.20             | 0.142                            | 3021.30             | 429.15              |
| A_68_P23591969 | chr5:34326576-34326620                            | NM_001033458:476   | Gm1673     | INSIDE                 | 0.154                                           | 0.456                            | 2418.12             | 1102.67             | 0.070                            | 1711.46             | 119.90              |
| A_68_P23591970 | chr5:34326722-34326766                            | NM_001033458:622   | Gm1673     | INSIDE                 | 0.206                                           | 0.640                            | 1317.32             | 843.64              | 0.132                            | 919.47              | 121.41              |
| A_68_P28744398 | chr12:112723379-112723423                         | NM_001033248:634   | Gm266      | INSIDE                 | 0.403                                           | 0.466                            | 1750.51             | 815.19              | 0.188                            | 1666.67             | 313.00              |
| A_68_P26035031 | chr8:89996648-89996692                            | NR_033430:-40      | Gm2694     | DIVERGENT_PROMOTER     | 0.602                                           | 0.465                            | 1283.10             | 596.31              | 0.280                            | 1145.03             | 320.35              |
| A_68_P26035034 | chr8:89997077-89997121                            | NR_033430:388      | Gm2694     | INSIDE                 | 0.165                                           | 0.630                            | 3175.04             | 2001.39             | 0.104                            | 2212.28             | 229.59              |
| A_68_P21046072 | chr2:19579131-19579175                            | NR_033642:372      | Gm3230     | INSIDE                 | 0.414                                           | 0.580                            | 1816.74             | 1053.00             | 0.240                            | 1498.43             | 359.31              |
| A_68_P31063011 | chr17:15115516-15115564                           | NM_001123367:236   | Gm3417     | INSIDE                 | 0.066                                           | 0.493                            | 5097.23             | 2514.76             | 0.033                            | 3680.04             | 120.47              |
| A_68_P31063013 | chr17:15115758-15115802                           | NM_001123367:4     | Gm3417     | DIVERGENT_PROMOTER     | 0.471                                           | 0.517                            | 1851.68             | 957.30              | 0.243                            | 1691.50             | 411.68              |
| A_68_P25766297 | chr8:33994011-33994055                            | NM_001177589:66466 | Gm3985     | DOWNSTREAM             | 0.268                                           | 0.596                            | 969.08              | 577.10              | 0.160                            | 761.22              | 121.61              |
| A_68_P25766298 | chr8:33994085-33994129                            | NM_001177589:66392 | Gm3985     | DOWNSTREAM             | 0.170                                           | 0.496                            | 1919.57             | 952.71              | 0.084                            | 1459.04             | 123.19              |
| A_68_P25766299 | chr8:33994276-33994320                            | NM_001177589:66200 | Gm3985     | DOWNSTREAM             | 0.438                                           | 0.680                            | 2856.05             | 1940.82             | 0.298                            | 2150.00             | 640.63              |
| A_68_P25504680 | chr7:134376542-134376586                          | NR_030674:80       | Gm4532     | INSIDE                 | 0.624                                           | 0.614                            | 1378.69             | 846.77              | 0.383                            | 1128.24             | 432.07              |
| A_68_P27327040 | chr10:88193638-88193682                           | NM_001037166:186   | Gm4925     | INSIDE                 | 0.210                                           | 0.682                            | 1158.20             | 790.22              | 0.144                            | 860.64              | 123.59              |
| A_68_P27327041 | chr10:88193707-88193751                           | NM_001037166:114   | Gm4925     | INSIDE                 | 0.202                                           | 0.712                            | 2460.09             | 1751.05             | 0.143                            | 1849.12             | 265.29              |
| A_68_P25362932 | chr7:106774074-106774118                          | NM_001195529:1517  | Gm4980     | INSIDE                 | 0.279                                           | 0.534                            | 2137.54             | 1141.77             | 0.149                            | 1580.08             | 235.53              |
| A_68_P25362934 | chr7:106774303-106774347                          | NM_001195529:1289  | Gm4980     | INSIDE                 | 0.316                                           | 0.565                            | 1208.77             | 682.81              | 0.178                            | 990.43              | 176.61              |
| A_68_P25362942 | chr7:106775190-106775234                          | NM_001195529:401   | Gm4980     | INSIDE                 | 0.533                                           | 0.469                            | 1476.70             | 691.87              | 0.250                            | 1077.85             | 269.29              |
| A_68_P25362945 | chr7:106775610-106775654                          | NM_001195529:-19   | Gm4980     | PROMOTER               | 0.221                                           | 0.596                            | 1216.15             | 725.10              | 0.132                            | 903.27              | 119.17              |
| A_68_P20875108 | chr1:182261016-182261060                          | NR_003623:-358     | Gm5069     | PROMOTER               | 0.504                                           | 0.427                            | 2698.69             | 1151.73             | 0.215                            | 2106.15             | 453.33              |
| A_68_P20875111 | chr1:182261385-182261429                          | NR_003623:-726     | Gm5069     | PROMOTER               | 0.504                                           | 0.628                            | 1635.64             | 1027.29             | 0.317                            | 1228.47             | 389.23              |
| A_68_P20875116 | chr1:182262065-182262109                          | NR_003623:-1406    | Gm5069     | PROMOTER               | 0.242                                           | 0.613                            | 1056.39             | 648.05              | 0.149                            | 815.81              | 121.22              |
| A_68_P20875120 | chr1:182262437-182262486                          | NR_003623:-1781    | Gm5069     | PROMOTER               | 0.227                                           | 0.471                            | 1415.53             | 667.34              | 0.107                            | 1133.67             | 121.35              |
| A_68_P23440271 | chr4:155109205-155109249                          | NM_001101506:314   | Gm5151     | INSIDE                 | 0.249                                           | 0.664                            | 1431.11             | 950.82              | 0.165                            | 978.84              | 161.92              |
| A_68_P24131920 | chr5:139296987-139297031                          | NM_001195128:975   | Gm5294     | INSIDE                 | 0.271                                           | 0.596                            | 1815.72             | 1083.07             | 0.162                            | 1460.19             | 235.83              |
| A_68_P24131922 | chr5:139297257-139297301                          | NM_001195128:1245  | Gm5294     | INSIDE                 | 0.151                                           | 0.538                            | 2285.55             | 1229.21             | 0.081                            | 1741.04             | 141.62              |

| ProbeName      | Target position of probe on CpG island microarray | TargetID          | GeneSymbol | CpG island Description | Ratio of relative methylation (TiO2-NP/Vehicle) | Sham group                       |                     |                     | TiO <sub>2</sub> -H group        |                     |                     |
|----------------|---------------------------------------------------|-------------------|------------|------------------------|-------------------------------------------------|----------------------------------|---------------------|---------------------|----------------------------------|---------------------|---------------------|
|                |                                                   |                   |            |                        |                                                 | Relative methylation (Cy-5/Cy-3) | Cy-3 signal (Input) | Cy-5 signal (MeDIP) | Relative methylation (Cy-5/Cy-3) | Cy-3 signal (Input) | Cy-5 signal (MeDIP) |
| A_68_P28043171 | chr11:96113156-96113200                           | NR_037977:205     | Gm53       | INSIDE                 | 0.272                                           | 0.525                            | 1062.94             | 557.89              | 0.143                            | 813.18              | 116.18              |
| A_68_P26912795 | chr10:5914411-5914463                             | NR_002891:-2938   | Gm5512     | PROMOTER               | 0.350                                           | 0.445                            | 1369.32             | 609.20              | 0.156                            | 961.81              | 149.71              |
| A_68_P25661163 | chr8:12385271-12385315                            | NR_027975:-478    | Gm5607     | PROMOTER               | 0.618                                           | 0.694                            | 1255.05             | 870.74              | 0.429                            | 981.76              | 420.97              |
| A_68_P25661487 | chr8:12430676-12430720                            | NR_027975:44928   | Gm5607     | INSIDE                 | 0.339                                           | 0.526                            | 1959.63             | 1030.26             | 0.178                            | 1552.09             | 276.81              |
| A_68_P25661492 | chr8:12431084-12431128                            | NR_027975:45336   | Gm5607     | INSIDE                 | 0.570                                           | 0.713                            | 3639.99             | 2594.08             | 0.406                            | 2677.83             | 1087.00             |
| A_68_P29338084 | chr13:113784193-113784237                         | NM_001037914:139  | Gm6320     | INSIDE                 | 0.321                                           | 0.575                            | 1394.98             | 801.53              | 0.185                            | 1268.59             | 234.19              |
| A_68_P29338085 | chr13:113784265-113784309                         | NM_001037914:211  | Gm6320     | INSIDE                 | 0.281                                           | 0.575                            | 1191.92             | 685.22              | 0.161                            | 977.43              | 157.79              |
| A_68_P21345229 | chr2:75497988-75498032                            | NR_033513:664     | Gm6793     | INSIDE                 | 0.510                                           | 0.486                            | 2613.81             | 1269.29             | 0.248                            | 2037.51             | 504.86              |
| A_68_P21345230 | chr2:75498077-75498131                            | NR_033513:758     | Gm6793     | INSIDE                 | 0.234                                           | 0.519                            | 1346.23             | 698.49              | 0.121                            | 1003.81             | 121.69              |
| A_68_P26508624 | chr9:51087195-51087239                            | NM_001195681:-557 | Gm684      | PROMOTER               | 0.663                                           | 0.738                            | 2252.09             | 1662.84             | 0.489                            | 1680.64             | 822.31              |
| A_68_P31162851 | chr17:36304426-36304470                           | NM_001081032:1034 | Gm8909     | INSIDE                 | 0.271                                           | 0.567                            | 2648.62             | 1501.56             | 0.154                            | 1891.47             | 291.08              |
| A_68_P24326760 | chr6:29424133-29424177                            | NM_001145360:2718 | Gm9047     | DOWNSTREAM             | 0.575                                           | 0.439                            | 1592.23             | 699.21              | 0.252                            | 1285.44             | 324.39              |
| A_68_P31929497 | chr19:5567328-5567372                             | NM_001033448:-723 | Gm962      | DIVERGENT_PROMOTER     | 0.210                                           | 0.396                            | 1771.28             | 701.58              | 0.083                            | 1400.99             | 116.79              |
| A_68_P31929504 | chr19:5568132-5568176                             | NM_001033448:81   | Gm962      | INSIDE                 | 0.629                                           | 0.497                            | 1629.72             | 810.65              | 0.313                            | 1261.36             | 394.82              |
| A_68_P26886025 | chr9:121766341-121766385                          | NM_001112668:287  | Gm9790     | INSIDE                 | 0.336                                           | 0.568                            | 3536.66             | 2007.95             | 0.191                            | 2439.06             | 465.53              |
| A_68_P21073093 | chr2:25433409-25433453                            | NM_001005424:2189 | Gm996      | INSIDE                 | 0.284                                           | 0.705                            | 1422.20             | 1002.37             | 0.201                            | 1083.70             | 217.30              |
| A_68_P21073096 | chr2:25433798-25433842                            | NM_001005424:1799 | Gm996      | INSIDE                 | 0.635                                           | 0.678                            | 1034.05             | 701.41              | 0.431                            | 814.96              | 351.21              |
| A_68_P21073102 | chr2:25434469-25434514                            | NM_001005424:1128 | Gm996      | INSIDE                 | 0.336                                           | 1.548                            | 1725.74             | 2672.20             | 0.520                            | 1236.81             | 642.79              |
| A_68_P21073106 | chr2:25434968-25435012                            | NM_001005424:629  | Gm996      | INSIDE                 | 0.377                                           | 0.563                            | 1539.04             | 865.75              | 0.212                            | 1109.75             | 235.27              |
| A_68_P21073109 | chr2:25435334-25435378                            | NM_001005424:263  | Gm996      | INSIDE                 | 0.416                                           | 0.678                            | 2103.14             | 1425.89             | 0.282                            | 1549.36             | 437.37              |
| A_68_P25150561 | chr7:64642517-64642562                            | NR_033504:-102    | Gm9962     | DIVERGENT_PROMOTER     | 0.490                                           | 0.449                            | 1807.40             | 810.77              | 0.220                            | 1425.00             | 313.44              |
| A_68_P25150562 | chr7:64642665-64642709                            | NR_033504:45      | Gm9962     | INSIDE                 | 0.100                                           | 0.526                            | 3078.98             | 1620.38             | 0.053                            | 2241.26             | 118.13              |
| A_68_P24611769 | chr6:86683533-86683577                            | NM_011818:-182    | Gmcl1      | PROMOTER               | 0.272                                           | 0.645                            | 819.39              | 528.22              | 0.175                            | 687.12              | 120.47              |
| A_68_P21909705 | chr2:181022801-181022845                          | NM_198169:-151    | Gmeb2      | PROMOTER               | 0.106                                           | 0.667                            | 2462.12             | 1641.71             | 0.070                            | 1723.44             | 121.47              |
| A_68_P21909706 | chr2:181022876-181022920                          | NM_198169:-227    | Gmeb2      | PROMOTER               | 0.432                                           | 0.624                            | 1107.72             | 691.60              | 0.270                            | 859.57              | 231.79              |
| A_68_P29578549 | chr14:47442107-47442163                           | NM_022023:-217    | Gmfb       | DIVERGENT_PROMOTER     | 0.201                                           | 0.504                            | 1458.55             | 734.90              | 0.101                            | 1152.78             | 116.58              |
| A_68_P25021899 | chr7:29221970-29222015                            | NM_022024:-473    | Gmfg       | DIVERGENT_PROMOTER     | 0.499                                           | 0.618                            | 1029.93             | 636.38              | 0.308                            | 901.62              | 277.76              |
| A_68_P28888885 | chr13:24853671-24853715                           | NM_020567:114     | Gmnn       | INSIDE                 | 0.414                                           | 0.546                            | 1466.72             | 800.57              | 0.226                            | 1159.39             | 261.93              |
| A_68_P28888886 | chr13:24853737-24853781                           | NM_020567:48      | Gmnn       | INSIDE                 | 0.623                                           | 0.652                            | 3986.32             | 2598.08             | 0.406                            | 3025.99             | 1229.46             |
| A_68_P29002205 | chr13:45602874-45602918                           | NM_025508:59      | Gmpr       | INSIDE                 | 0.605                                           | 0.546                            | 1397.33             | 763.28              | 0.330                            | 1112.58             | 367.64              |
| A_68_P22194396 | chr3:63780003-63780047                            | NM_001033300:-40  | Gmps       | PROMOTER               | 0.408                                           | 0.683                            | 1296.60             | 885.44              | 0.279                            | 1021.69             | 284.75              |
| A_68_P27290416 | chr10:81008062-81008106                           | NM_010301:-293    | Gna11      | PROMOTER               | 0.315                                           | 0.629                            | 1392.76             | 876.66              | 0.199                            | 1151.07             | 228.51              |
| A_68_P28118144 | chr11:109223851-109223895                         | NM_010303:-235    | Gna13      | PROMOTER               | 0.316                                           | 0.700                            | 2039.32             | 1427.59             | 0.221                            | 1392.58             | 307.64              |
| A_68_P28118149 | chr11:109224381-109224425                         | NM_010303:295     | Gna13      | INSIDE                 | 0.611                                           | 0.521                            | 1186.78             | 618.62              | 0.318                            | 840.02              | 267.48              |
| A_68_P28118150 | chr11:109224474-109224518                         | NM_010303:389     | Gna13      | INSIDE                 | 0.490                                           | 0.588                            | 2640.98             | 1552.30             | 0.288                            | 2010.43             | 579.54              |
| A_68_P31980262 | chr19:16511319-16511363                           | NM_008137:1184    | Gna14      | INSIDE                 | 0.075                                           | 0.685                            | 3023.98             | 2070.76             | 0.051                            | 2280.64             | 117.31              |
| A_68_P23510640 | chr5:17865451-17865500                            | NM_010305:756     | Gnail      | INSIDE                 | 0.258                                           | 0.524                            | 1027.11             | 538.29              | 0.135                            | 882.05              | 119.26              |
| A_68_P26073621 | chr8:96335410-96335454                            | NM_001113384:695  | Gnao1      | INSIDE                 | 0.181                                           | 0.552                            | 2769.36             | 1529.05             | 0.100                            | 2015.45             | 200.99              |
| A_68_P31978254 | chr19:16207846-16207890                           | NM_008139:548     | Gnaq       | INSIDE                 | 0.612                                           | 0.495                            | 1558.38             | 771.01              | 0.303                            | 1272.35             | 385.25              |
| A_68_P31978257 | chr19:16208260-16208304                           | NM_008139:962     | Gnaq       | INSIDE                 | 0.537                                           | 0.350                            | 1795.94             | 629.12              | 0.188                            | 1381.92             | 260.20              |
| A_68_P21874764 | chr2:174156135-174156179                          | NM_001077510:567  | Gnas       | INSIDE                 | 0.217                                           | 0.691                            | 2930.84             | 2026.36             | 0.150                            | 2257.92             | 339.15              |
| A_68_P21874766 | chr2:174156274-174156318                          | NM_001077510:707  | Gnas       | INSIDE                 | 0.325                                           | 0.643                            | 1812.77             | 1166.24             | 0.209                            | 1502.48             | 313.93              |
| A_68_P26810381 | chr9:107578748-107578792                          | NM_008140:3153    | Gnat1      | INSIDE                 | 0.373                                           | 0.650                            | 3492.37             | 2268.41             | 0.242                            | 2393.76             | 580.43              |
| A_68_P26810382 | chr9:107578840-107578884                          | NM_008140:3061    | Gnat1      | INSIDE                 | 0.370                                           | 0.562                            | 2572.85             | 1446.90             | 0.208                            | 1862.26             | 387.15              |

| ProbeName      | Target position of probe on CpG island microarray | TargetID          | GeneSymbol | CpG island Description | Ratio of relative methylation (TiO2-NP/Vehicle) | Sham group                       |                     |                     | TiO <sub>2</sub> -H group        |                     |                     |
|----------------|---------------------------------------------------|-------------------|------------|------------------------|-------------------------------------------------|----------------------------------|---------------------|---------------------|----------------------------------|---------------------|---------------------|
|                |                                                   |                   |            |                        |                                                 | Relative methylation (Cy-5/Cy-3) | Cy-3 signal (Input) | Cy-5 signal (MeDIP) | Relative methylation (Cy-5/Cy-3) | Cy-3 signal (Input) | Cy-5 signal (MeDIP) |
| A_68_P23438946 | chr4:154866208-154866252                          | NM_001160016:761  | Gnb1       | INSIDE                 | 0.273                                           | 0.489                            | 2009.40             | 983.07              | 0.134                            | 1514.53             | 202.52              |
| A_68_P30580078 | chr16:18498994-18499038                           | NM_023120:53      | Gnb11      | INSIDE                 | 0.186                                           | 0.349                            | 2572.54             | 898.62              | 0.065                            | 2048.72             | 133.31              |
| A_68_P24126241 | chr5:137971926-137971970                          | NM_010312:2509    | Gnb2       | INSIDE                 | 0.403                                           | 0.702                            | 1875.13             | 1316.69             | 0.283                            | 1528.56             | 432.65              |
| A_68_P24126242 | chr5:137972085-137972129                          | NM_010312:2351    | Gnb2       | INSIDE                 | 0.518                                           | 0.587                            | 1855.41             | 1088.88             | 0.304                            | 1489.16             | 453.02              |
| A_68_P24126250 | chr5:137972865-137972909                          | NM_010312:1571    | Gnb2       | INSIDE                 | 0.232                                           | 0.470                            | 1789.81             | 841.55              | 0.109                            | 1339.94             | 146.17              |
| A_68_P24126253 | chr5:137973169-137973213                          | NM_010312:1267    | Gnb2       | INSIDE                 | 0.229                                           | 0.518                            | 3088.52             | 1599.67             | 0.118                            | 2325.88             | 275.27              |
| A_68_P27779978 | chr11:48613766-48613813                           | NM_008143:-72     | Gnb211     | PROMOTER               | 0.276                                           | 0.433                            | 1548.56             | 670.53              | 0.120                            | 1016.21             | 121.67              |
| A_68_P22875166 | chr4:44085073-44085117                            | NM_001190414:451  | Gne        | INSIDE                 | 0.296                                           | 0.428                            | 2122.03             | 909.19              | 0.127                            | 1602.89             | 203.35              |
| A_68_P31105766 | chr17:25854648-25854692                           | NM_022422:554     | Gng13      | INSIDE                 | 0.211                                           | 0.607                            | 1896.77             | 1151.03             | 0.128                            | 1384.17             | 177.16              |
| A_68_P27286895 | chr10:80477880-80477928                           | NM_010319:-234    | Gng7       | PROMOTER               | 0.191                                           | 0.491                            | 1568.92             | 770.85              | 0.094                            | 1250.67             | 117.50              |
| A_68_P31162040 | chr17:36117126-36117170                           | NM_008136:249     | Gnl1       | INSIDE                 | 0.422                                           | 0.509                            | 1276.95             | 650.32              | 0.215                            | 977.43              | 210.30              |
| A_68_P31162043 | chr17:36117444-36117488                           | NM_008136:567     | Gnl1       | INSIDE                 | 0.213                                           | 0.639                            | 2631.89             | 1682.19             | 0.136                            | 1877.78             | 255.71              |
| A_68_P32743828 | chrX:147451859-147451906                          | NM_198110:-17     | Gnl31      | PROMOTER               | 0.210                                           | 1.520                            | 1249.25             | 1899.02             | 0.320                            | 439.86              | 140.58              |
| A_68_P23778715 | chr5:69983278-69983322                            | NM_001038015:224  | Gnpda2     | INSIDE                 | 0.170                                           | 0.698                            | 2200.94             | 1535.44             | 0.118                            | 1745.74             | 206.77              |
| A_68_P21114434 | chr2:32143877-32143921                            | NM_001080968:126  | Golga2     | INSIDE                 | 0.316                                           | 0.640                            | 976.66              | 624.91              | 0.202                            | 710.52              | 143.72              |
| A_68_P21114435 | chr2:32143977-32144021                            | NM_001080968:226  | Golga2     | INSIDE                 | 0.105                                           | 0.725                            | 2305.50             | 1670.42             | 0.076                            | 1647.98             | 125.77              |
| A_68_P23978152 | chr5:110605959-110606003                          | NM_008146:261     | Golga3     | INSIDE                 | 0.276                                           | 0.742                            | 3679.06             | 2728.70             | 0.205                            | 2822.51             | 577.60              |
| A_68_P26867067 | chr9:118468644-118468695                          | NM_018748:53234   | Golga4     | INSIDE                 | 0.658                                           | 2.225                            | 881.75              | 1962.18             | 1.465                            | 798.09              | 1169.49             |
| A_68_P25715748 | chr8:24367539-24367583                            | NM_001042484:-8   | Golga7     | PROMOTER               | 0.413                                           | 0.613                            | 2389.75             | 1464.08             | 0.253                            | 1668.08             | 421.69              |
| A_68_P32119983 | chr19:42330356-42330400                           | NM_027694:150     | Golga7b    | INSIDE                 | 0.288                                           | 0.578                            | 1822.77             | 1053.90             | 0.167                            | 1356.45             | 226.09              |
| A_68_P22248622 | chr3:75760179-75760223                            | NM_175193:553     | Golim4     | INSIDE                 | 0.305                                           | 0.480                            | 1318.91             | 632.79              | 0.146                            | 1007.44             | 147.25              |
| A_68_P30021004 | chr15:12251953-12252003                           | NM_025673:728     | Golph3     | INSIDE                 | 0.288                                           | 0.608                            | 1180.07             | 717.61              | 0.175                            | 896.26              | 157.00              |
| A_68_P26875190 | chr9:119846515-119846559                          | NM_028976:140     | Gorasp1    | INSIDE                 | 0.336                                           | 0.582                            | 3904.44             | 2271.27             | 0.196                            | 2671.26             | 522.69              |
| A_68_P28086531 | chr11:103558931-103558975                         | NM_019650:72      | Gosr2      | INSIDE                 | 0.602                                           | 0.456                            | 1316.56             | 600.68              | 0.275                            | 1112.71             | 305.66              |
| A_68_P32127031 | chr19:43599236-43599283                           | NM_010324:-164    | Got1       | PROMOTER               | 0.220                                           | 0.351                            | 2021.86             | 709.33              | 0.077                            | 1499.30             | 115.49              |
| A_68_P25737190 | chr8:28317205-28317249                            | NM_029674:-4207   | Got111     | PROMOTER               | 0.558                                           | 0.709                            | 1356.61             | 961.52              | 0.396                            | 1032.68             | 408.54              |
| A_68_P26085825 | chr8:98411955-98411999                            | NM_010325:289     | Got2       | INSIDE                 | 0.334                                           | 0.623                            | 1481.30             | 923.05              | 0.208                            | 1115.16             | 232.23              |
| A_68_P26085828 | chr8:98412281-98412325                            | NM_010325:-37     | Got2       | PROMOTER               | 0.359                                           | 0.707                            | 2729.09             | 1929.90             | 0.254                            | 2056.67             | 521.77              |
| A_68_P30641174 | chr16:30309847-30309891                           | NM_008148:997     | Gp5        | INSIDE                 | 0.287                                           | 0.678                            | 1551.89             | 1052.21             | 0.194                            | 1119.97             | 217.67              |
| A_68_P30347594 | chr15:76161371-76161427                           | NM_010331:-325    | Gpaa1      | PROMOTER               | 0.097                                           | 1.732                            | 3798.95             | 6579.07             | 0.168                            | 2617.21             | 439.45              |
| A_68_P25048708 | chr7:36103274-36103318                            | NM_026181:163     | Gpatch1    | INSIDE                 | 0.551                                           | 0.600                            | 2849.90             | 1709.53             | 0.331                            | 2327.19             | 769.70              |
| A_68_P28080240 | chr11:102417615-102417659                         | NM_001159492:-164 | Gpatch8    | PROMOTER               | 0.188                                           | 0.733                            | 2111.17             | 1546.99             | 0.138                            | 1590.26             | 219.47              |
| A_68_P29329254 | chr13:112280052-112280096                         | NM_001122963:175  | Gpbb1      | INSIDE                 | 0.294                                           | 1.470                            | 5825.93             | 8562.02             | 0.432                            | 3881.47             | 1675.84             |
| A_68_P20451396 | chr1:94727977-94728021                            | NM_016696:-264    | Gpc1       | PROMOTER               | 0.664                                           | 0.381                            | 2725.04             | 1037.67             | 0.253                            | 2281.88             | 577.30              |
| A_68_P20451402 | chr1:94728781-94728825                            | NM_016696:540     | Gpc1       | INSIDE                 | 0.384                                           | 0.399                            | 3973.72             | 1585.15             | 0.153                            | 3108.58             | 475.88              |
| A_68_P20451403 | chr1:94728878-94728922                            | NM_016696:638     | Gpc1       | INSIDE                 | 0.249                                           | 0.530                            | 1071.57             | 568.12              | 0.132                            | 880.34              | 116.38              |
| A_68_P32383359 | chrX:49965740-49965784                            | NM_016697:1389    | Gpc3       | INSIDE                 | 0.167                                           | 1.414                            | 1187.23             | 1678.79             | 0.237                            | 505.04              | 119.52              |
| A_68_P32380508 | chrX:49517357-49517405                            | NM_008150:720     | Gpc4       | INSIDE                 | 0.194                                           | 1.566                            | 934.20              | 1463.14             | 0.304                            | 381.37              | 116.13              |
| A_68_P32380514 | chrX:49518048-49518092                            | NM_008150:30      | Gpc4       | INSIDE                 | 0.031                                           | 3.509                            | 2434.58             | 8541.97             | 0.109                            | 1060.70             | 115.78              |
| A_68_P32380515 | chrX:49518249-49518293                            | NM_008150:-170    | Gpc4       | PROMOTER               | 0.045                                           | 2.950                            | 2257.23             | 6658.92             | 0.134                            | 890.06              | 118.95              |
| A_68_P29928901 | chr14:117325143-117325187                         | NM_001079844:628  | Gpc6       | INSIDE                 | 0.124                                           | 0.488                            | 3170.00             | 1545.95             | 0.061                            | 2569.44             | 155.61              |
| A_68_P26847148 | chr9:114842896-114842940                          | NM_175380:187     | Gpd11      | INSIDE                 | 0.442                                           | 0.646                            | 1884.94             | 1217.44             | 0.285                            | 1483.66             | 423.46              |
| A_68_P21240630 | chr2:57090894-57090938                            | NM_010274:124     | Gpd2       | INSIDE                 | 0.226                                           | 0.409                            | 1920.58             | 784.94              | 0.092                            | 1393.48             | 128.66              |
| A_68_P28563524 | chr12:79327386-79327430                           | NM_145965:-233    | Gphn       | PROMOTER               | 0.295                                           | 0.680                            | 1080.98             | 735.04              | 0.201                            | 887.89              | 178.22              |

| ProbeName      | Target position of probe on CpG island microarray | TargetID           | GeneSymbol | CpG island Description | Ratio of relative methylation (TiO2-NP/Vehicle) | Sham group                       |                     |                     | TiO <sub>2</sub> -H group        |                     |                     |
|----------------|---------------------------------------------------|--------------------|------------|------------------------|-------------------------------------------------|----------------------------------|---------------------|---------------------|----------------------------------|---------------------|---------------------|
|                |                                                   |                    |            |                        |                                                 | Relative methylation (Cy-5/Cy-3) | Cy-3 signal (Input) | Cy-5 signal (MeDIP) | Relative methylation (Cy-5/Cy-3) | Cy-3 signal (Input) | Cy-5 signal (MeDIP) |
| A_68_P28563528 | chr12:79327956-79328000                           | NM_145965:337      | Gphn       | INSIDE                 | 0.250                                           | 0.623                            | 931.00              | 579.71              | 0.156                            | 749.76              | 116.75              |
| A_68_P32239706 | chrX:7274518-7274562                              | NM_173747:281      | Gpkow      | INSIDE                 | 0.058                                           | 3.468                            | 1824.03             | 6326.36             | 0.200                            | 618.74              | 124.05              |
| A_68_P32239707 | chrX:7274604-7274648                              | NM_173747:367      | Gpkow      | INSIDE                 | 0.189                                           | 2.356                            | 1363.34             | 3212.02             | 0.446                            | 587.75              | 262.05              |
| A_68_P23318324 | chr4:133140609-133140653                          | NM_133884:343      | Gpn2       | INSIDE                 | 0.353                                           | 0.556                            | 1487.26             | 826.96              | 0.196                            | 1219.44             | 239.12              |
| A_68_P23318326 | chr4:133140776-133140820                          | NM_133884:511      | Gpn2       | INSIDE                 | 0.404                                           | 0.640                            | 1169.25             | 748.32              | 0.259                            | 985.30              | 254.87              |
| A_68_P32401469 | chrX:54756662-54756706                            | NM_001033360:250   | Gpr101     | INSIDE                 | 0.279                                           | 1.503                            | 1133.46             | 1703.26             | 0.419                            | 530.24              | 222.05              |
| A_68_P21107277 | chr2:31008194-31008238                            | NM_178760:381      | Gpr107     | INSIDE                 | 0.491                                           | 0.521                            | 1101.55             | 573.61              | 0.256                            | 929.38              | 237.79              |
| A_68_P31260713 | chr17:57386929-57386973                           | NM_030084:114      | Gpr108     | INSIDE                 | 0.431                                           | 0.560                            | 1295.83             | 725.49              | 0.241                            | 933.64              | 225.09              |
| A_68_P31260715 | chr17:57387144-57387195                           | NM_030084:-105     | Gpr108     | DIVERGENT_PROMOTER     | 0.215                                           | 0.558                            | 1245.72             | 695.29              | 0.120                            | 974.77              | 117.10              |
| A_68_P24168905 | chr5:147396571-147396615                          | NM_008151:-612     | Gpr12      | PROMOTER               | 0.177                                           | 0.445                            | 1817.97             | 809.44              | 0.079                            | 1519.45             | 119.57              |
| A_68_P25580591 | chr7:147020155-147020199                          | NM_177469:104      | Gpr123     | INSIDE                 | 0.366                                           | 0.556                            | 951.68              | 528.86              | 0.204                            | 821.51              | 167.20              |
| A_68_P25736445 | chr8:28195931-28195975                            | NM_054044:-360     | Gpr124     | PROMOTER               | 0.630                                           | 0.559                            | 1132.18             | 633.02              | 0.352                            | 1019.07             | 359.21              |
| A_68_P25736704 | chr8:28232129-28232173                            | NM_054044:35838    | Gpr124     | INSIDE                 | 0.368                                           | 1.449                            | 1249.75             | 1810.38             | 0.533                            | 1079.04             | 575.38              |
| A_68_P23681255 | chr5:50449451-50449501                            | NM_133911:759      | Gpr125     | INSIDE                 | 0.358                                           | 0.666                            | 1890.34             | 1259.88             | 0.238                            | 1368.67             | 326.31              |
| A_68_P26957818 | chr10:14264701-14264745                           | NM_001002268:120   | Gpr126     | INSIDE                 | 0.398                                           | 0.467                            | 1511.94             | 705.41              | 0.186                            | 1275.00             | 236.56              |
| A_68_P28529999 | chr12:73171616-73171660                           | NM_181752:340      | Gpr135     | INSIDE                 | 0.198                                           | 0.679                            | 5572.04             | 3785.44             | 0.134                            | 3970.28             | 533.12              |
| A_68_P28530000 | chr12:73171697-73171741                           | NM_181752:260      | Gpr135     | INSIDE                 | 0.441                                           | 0.671                            | 2296.17             | 1540.35             | 0.296                            | 1759.27             | 519.91              |
| A_68_P28530004 | chr12:73172194-73172239                           | NM_181752:-238     | Gpr135     | PROMOTER               | 0.534                                           | 0.608                            | 1217.10             | 740.47              | 0.325                            | 1036.36             | 336.95              |
| A_68_P31936885 | chr19:7026235-7026279                             | NM_001177361:-9316 | Gpr137     | PROMOTER               | 0.121                                           | 0.695                            | 1914.49             | 1330.29             | 0.084                            | 1427.45             | 119.85              |
| A_68_P28833516 | chr13:13485759-13485803                           | NM_031999:111      | Gpr137b    | INSIDE                 | 0.555                                           | 0.623                            | 1968.81             | 1226.19             | 0.346                            | 1665.85             | 575.57              |
| A_68_P28833511 | chr13:12742044-12742088                           | NR_003568:596      | Gpr137b-ps | INSIDE                 | 0.079                                           | 0.555                            | 4116.48             | 2283.77             | 0.044                            | 3162.14             | 138.51              |
| A_68_P28833514 | chr13:12742271-12742315                           | NR_003568:370      | Gpr137b-ps | INSIDE                 | 0.274                                           | 0.479                            | 1584.31             | 759.23              | 0.131                            | 1308.74             | 171.55              |
| A_68_P28833519 | chr13:12742906-12742950                           | NR_003568:-266     | Gpr137b-ps | PROMOTER               | 0.398                                           | 0.363                            | 4391.82             | 1592.50             | 0.144                            | 3385.93             | 488.41              |
| A_68_P29569518 | chr14:45840204-45840248                           | NM_027518:835      | Gpr137c    | INSIDE                 | 0.329                                           | 0.680                            | 1405.75             | 955.29              | 0.224                            | 1019.18             | 227.96              |
| A_68_P25462321 | chr7:126328077-126328121                          | NM_001024138:-210  | Gpr139     | PROMOTER               | 0.634                                           | 0.569                            | 1096.54             | 623.49              | 0.360                            | 757.26              | 272.78              |
| A_68_P32750743 | chrX:149216712-149216756                          | NM_010951:271      | Gpr143     | INSIDE                 | 0.139                                           | 1.605                            | 1725.72             | 2770.55             | 0.223                            | 657.78              | 146.37              |
| A_68_P22187974 | chr3:62407714-62407758                            | NM_177346:1326     | Gpr149     | INSIDE                 | 0.159                                           | 0.555                            | 1639.45             | 910.62              | 0.088                            | 1377.95             | 121.42              |
| A_68_P22187976 | chr3:62407890-62407934                            | NM_177346:1150     | Gpr149     | INSIDE                 | 0.298                                           | 0.714                            | 1701.46             | 1214.37             | 0.213                            | 1269.21             | 269.94              |
| A_68_P21331222 | chr2:73224458-73224502                            | NM_001190297:-25   | Gpr155     | PROMOTER               | 0.444                                           | 0.566                            | 4010.01             | 2269.44             | 0.251                            | 3134.06             | 787.82              |
| A_68_P21331225 | chr2:73224765-73224809                            | NM_001190297:-331  | Gpr155     | PROMOTER               | 0.325                                           | 0.588                            | 2712.39             | 1594.02             | 0.191                            | 2026.63             | 386.67              |
| A_68_P21331226 | chr2:73224914-73224958                            | NM_001190297:-481  | Gpr155     | PROMOTER               | 0.276                                           | 0.517                            | 1051.40             | 543.58              | 0.143                            | 819.19              | 116.82              |
| A_68_P30683214 | chr16:37916363-37916407                           | NM_153394:-197     | Gpr156     | PROMOTER               | 0.543                                           | 0.654                            | 962.33              | 629.66              | 0.355                            | 758.05              | 269.48              |
| A_68_P23404232 | chr4:149461503-149461547                          | NM_177366:-87      | Gpr157     | PROMOTER               | 0.244                                           | 1.620                            | 10929.57            | 17710.04            | 0.396                            | 7593.87             | 3007.82             |
| A_68_P23404323 | chr4:149475519-149475563                          | NM_177366:13929    | Gpr157     | INSIDE                 | 0.349                                           | 1.558                            | 2216.23             | 3452.56             | 0.543                            | 1619.05             | 879.43              |
| A_68_P23404324 | chr4:149475624-149475668                          | NM_177366:14035    | Gpr157     | INSIDE                 | 0.405                                           | 1.773                            | 2904.68             | 5150.79             | 0.719                            | 2051.82             | 1474.86             |
| A_68_P21054862 | chr2:21289571-21289618                            | NM_001004761:401   | Gpr158     | INSIDE                 | 0.428                                           | 0.553                            | 984.62              | 544.69              | 0.237                            | 837.31              | 198.19              |
| A_68_P22030513 | chr3:30755322-30755366                            | NM_001134385:473   | Gpr160     | INSIDE                 | 0.443                                           | 0.555                            | 2154.68             | 1195.23             | 0.246                            | 1568.11             | 385.21              |
| A_68_P24817420 | chr6:124811153-124811197                          | NM_013533:2761     | Gpr162     | INSIDE                 | 0.650                                           | 2.824                            | 1192.47             | 3368.01             | 1.834                            | 939.70              | 1723.85             |
| A_68_P24817442 | chr6:124813681-124813725                          | NM_013533:233      | Gpr162     | INSIDE                 | 0.369                                           | 0.432                            | 2790.75             | 1206.46             | 0.159                            | 2126.92             | 339.15              |
| A_68_P30349000 | chr15:76369261-76369305                           | NM_029643:-90      | Gpr172b    | DIVERGENT_PROMOTER     | 0.211                                           | 0.610                            | 1310.06             | 798.80              | 0.128                            | 921.05              | 118.29              |
| A_68_P29936841 | chr14:118536110-118536156                         | NM_021434:-216     | Gpr180     | DIVERGENT_PROMOTER     | 0.284                                           | 0.645                            | 846.89              | 546.24              | 0.183                            | 635.90              | 116.38              |
| A_68_P24864114 | chr6:134847635-134847686                          | NM_001167697:-9783 | Gpr19      | PROMOTER               | 0.303                                           | 0.666                            | 1646.81             | 1096.63             | 0.202                            | 1249.68             | 252.28              |
| A_68_P24864116 | chr6:134847884-134847928                          | NM_001167695:-73   | Gpr19      | PROMOTER               | 0.486                                           | 0.427                            | 1300.51             | 555.03              | 0.207                            | 1069.51             | 221.73              |
| A_68_P20644872 | chr1:138156299-138156343                          | NM_001101516:1130  | Gpr25      | INSIDE                 | 0.478                                           | 0.513                            | 1269.17             | 650.55              | 0.245                            | 954.00              | 233.70              |

| ProbeName      | Target position of probe on CpG island microarray | TargetID           | GeneSymbol | CpG island Description | Ratio of relative methylation (TiO2-NP/Vehicle) | Sham group                       |                     |                     | TiO <sub>2</sub> -H group        |                     |                     |
|----------------|---------------------------------------------------|--------------------|------------|------------------------|-------------------------------------------------|----------------------------------|---------------------|---------------------|----------------------------------|---------------------|---------------------|
|                |                                                   |                    |            |                        |                                                 | Relative methylation (Cy-5/Cy-3) | Cy-3 signal (Input) | Cy-5 signal (MeDIP) | Relative methylation (Cy-5/Cy-3) | Cy-3 signal (Input) | Cy-5 signal (MeDIP) |
| A_68_P20644875 | chr1:138156699-138156743                          | NM_001101516:730   | Gpr25      | INSIDE                 | 0.236                                           | 0.409                            | 2461.74             | 1005.72             | 0.096                            | 1911.15             | 184.04              |
| A_68_P25531562 | chr7:139158754-139158798                          | NM_173410:634      | Gpr26      | INSIDE                 | 0.222                                           | 0.404                            | 1661.87             | 671.82              | 0.090                            | 1302.92             | 117.10              |
| A_68_P31953771 | chr19:11015569-11015613                           | NM_009962:3941     | Gpr44      | INSIDE                 | 0.346                                           | 0.585                            | 1188.64             | 695.44              | 0.203                            | 938.38              | 190.04              |
| A_68_P20186163 | chr1:43010333-43010377                            | NM_053107:638      | Gpr45      | INSIDE                 | 0.088                                           | 1.770                            | 10255.33            | 18152.41            | 0.156                            | 6082.87             | 951.65              |
| A_68_P32454737 | chrX:68917956-68918000                            | NM_010340:1037     | Gpr50      | INSIDE                 | 0.150                                           | 1.914                            | 3135.75             | 6003.36             | 0.288                            | 1138.91             | 328.04              |
| A_68_P26803573 | chr9:106367885-106367929                          | NM_001159652:365   | Gpr62      | INSIDE                 | 0.284                                           | 0.609                            | 1636.61             | 996.12              | 0.173                            | 1176.95             | 203.18              |
| A_68_P32779374 | chrX:156828817-156828861                          | NM_001079847:217   | Gpr64      | INSIDE                 | 0.114                                           | 1.648                            | 1878.78             | 3095.79             | 0.189                            | 749.51              | 141.29              |
| A_68_P28684630 | chr12:102137196-102137240                         | NM_001177674:516   | Gpr68      | INSIDE                 | 0.236                                           | 0.446                            | 1366.00             | 609.35              | 0.105                            | 1112.33             | 117.31              |
| A_68_P28684631 | chr12:102137378-102137422                         | NM_001177674:334   | Gpr68      | INSIDE                 | 0.598                                           | 0.509                            | 1290.68             | 656.58              | 0.304                            | 975.80              | 296.96              |
| A_68_P28684632 | chr12:102137444-102137488                         | NM_001177674:268   | Gpr68      | INSIDE                 | 0.566                                           | 0.504                            | 2787.51             | 1405.18             | 0.285                            | 1916.13             | 546.92              |
| A_68_P28684633 | chr12:102137516-102137560                         | NM_001177674:196   | Gpr68      | INSIDE                 | 0.152                                           | 0.514                            | 2130.13             | 1094.36             | 0.078                            | 1553.16             | 121.28              |
| A_68_P22448211 | chr3:115955166-115955210                          | NM_022427:1214     | Gpr88      | INSIDE                 | 0.389                                           | 0.610                            | 909.64              | 554.72              | 0.237                            | 837.06              | 198.43              |
| A_68_P22448216 | chr3:115955553-115955597                          | NM_022427:828      | Gpr88      | INSIDE                 | 0.265                                           | 0.697                            | 1122.37             | 782.55              | 0.184                            | 889.23              | 164.02              |
| A_68_P22351744 | chr3:96708735-96708782                            | NM_026229:463      | Gpr89      | INSIDE                 | 0.235                                           | 0.518                            | 1322.86             | 685.78              | 0.122                            | 1099.69             | 133.83              |
| A_68_P24864941 | chr6:135015515-135015567                          | NM_181444:-139     | Gpre5a     | PROMOTER               | 0.167                                           | 0.528                            | 1948.37             | 1028.07             | 0.088                            | 1360.19             | 119.65              |
| A_68_P28150124 | chr11:114712661-114712705                         | NM_001110337:-163  | Gpre5c     | PROMOTER               | 0.281                                           | 0.342                            | 1622.76             | 555.06              | 0.096                            | 1266.11             | 121.86              |
| A_68_P27897908 | chr11:69727660-69727704                           | NM_019726:-11      | Gps2       | PROMOTER               | 0.655                                           | 0.503                            | 2695.71             | 1356.48             | 0.330                            | 1950.72             | 642.99              |
| A_68_P27897910 | chr11:69727956-69728000                           | NM_019726:285      | Gps2       | INSIDE                 | 0.583                                           | 0.475                            | 2358.46             | 1120.53             | 0.277                            | 2000.33             | 553.62              |
| A_68_P21077788 | chr2:26171431-26171475                            | NM_001199147:-3837 | Gpsm1      | PROMOTER               | 0.186                                           | 0.695                            | 2432.36             | 1691.13             | 0.130                            | 1639.41             | 212.31              |
| A_68_P30350021 | chr15:76528223-76528267                           | NM_182805:1051     | Gpt        | INSIDE                 | 0.536                                           | 0.499                            | 2407.88             | 1201.20             | 0.267                            | 1944.87             | 520.05              |
| A_68_P26025053 | chr8:88016777-88016821                            | NM_173866:283      | Gpt2       | INSIDE                 | 0.434                                           | 0.679                            | 1680.35             | 1140.21             | 0.294                            | 1320.66             | 388.62              |
| A_68_P26025056 | chr8:88017117-88017161                            | NM_173866:623      | Gpt2       | INSIDE                 | 0.088                                           | 0.679                            | 3052.04             | 2071.98             | 0.060                            | 2121.83             | 126.60              |
| A_68_P26814363 | chr9:108241800-108241844                          | NM_008160:412      | Gpx1       | INSIDE                 | 0.263                                           | 0.526                            | 1512.56             | 794.87              | 0.138                            | 1164.10             | 160.62              |
| A_68_P27812596 | chr11:54716387-54716431                           | NM_008161:-19      | Gpx3       | PROMOTER               | 0.406                                           | 0.537                            | 985.97              | 529.92              | 0.218                            | 768.72              | 167.64              |
| A_68_P27280641 | chr10:79516441-79516485                           | NM_001037741:-319  | Gpx4       | PROMOTER               | 0.478                                           | 0.502                            | 2844.34             | 1428.39             | 0.240                            | 1949.29             | 468.24              |
| A_68_P27280642 | chr10:79516583-79516627                           | NM_001037741:-177  | Gpx4       | PROMOTER               | 0.165                                           | 0.306                            | 3440.50             | 1053.80             | 0.051                            | 2600.79             | 131.41              |
| A_68_P23195896 | chr4:108079185-108079229                          | NM_024198:112      | Gpx7       | INSIDE                 | 0.161                                           | 0.629                            | 1653.33             | 1039.44             | 0.101                            | 1128.72             | 113.93              |
| A_68_P25035344 | chr7:31935750-31935794                            | NM_027898:297      | Gramd1a    | INSIDE                 | 0.290                                           | 0.720                            | 2585.09             | 1861.85             | 0.209                            | 1791.82             | 374.37              |
| A_68_P30404764 | chr15:85888808-85888852                           | NM_001205353:-326  | Gramd4     | PROMOTER               | 0.184                                           | 0.509                            | 1718.53             | 875.47              | 0.094                            | 1288.34             | 121.02              |
| A_68_P30490430 | chr15:101055110-101055154                         | NM_019518:495      | Grasp      | INSIDE                 | 0.255                                           | 0.420                            | 1458.01             | 612.63              | 0.107                            | 1122.94             | 120.32              |
| A_68_P21283785 | chr2:64860691-64860735                            | NM_016719:111      | Grb14      | INSIDE                 | 0.267                                           | 0.583                            | 1408.09             | 820.40              | 0.156                            | 1085.28             | 168.77              |
| A_68_P21283787 | chr2:64861006-64861050                            | NM_016719:-205     | Grb14      | PROMOTER               | 0.339                                           | 0.576                            | 1649.62             | 950.03              | 0.195                            | 1437.21             | 280.90              |
| A_68_P28154940 | chr11:115569306-115569350                         | NM_008163:583      | Grb2       | INSIDE                 | 0.250                                           | 0.475                            | 1192.48             | 565.84              | 0.119                            | 986.11              | 116.90              |
| A_68_P28056595 | chr11:98319477-98319521                           | NM_010346:11351    | Grb7       | DOWNSTREAM             | 0.284                                           | 0.545                            | 2796.07             | 1523.32             | 0.155                            | 2077.31             | 321.17              |
| A_68_P24816729 | chr6:124690602-124690649                          | NM_013535:472      | Grec10     | INSIDE                 | 0.150                                           | 0.716                            | 1744.89             | 1249.61             | 0.107                            | 1212.94             | 130.21              |
| A_68_P24816733 | chr6:124690988-124691032                          | NM_013535:87       | Grec10     | INSIDE                 | 0.297                                           | 0.555                            | 943.86              | 524.02              | 0.165                            | 731.22              | 120.76              |
| A_68_P28266912 | chr12:16807246-16807296                           | NM_015764:422      | Greb1      | INSIDE                 | 0.213                                           | 0.662                            | 1020.75             | 676.17              | 0.141                            | 843.42              | 119.20              |
| A_68_P21536545 | chr2:113597825-113597869                          | NM_011824:959      | Grem1      | INSIDE                 | 0.208                                           | 0.495                            | 1505.72             | 745.64              | 0.103                            | 1194.34             | 123.19              |
| A_68_P21536546 | chr2:113597904-113597948                          | NM_011824:879      | Grem1      | INSIDE                 | 0.634                                           | 0.527                            | 1857.10             | 978.87              | 0.334                            | 1209.25             | 404.16              |
| A_68_P23329301 | chr4:135126386-135126430                          | NM_001013756:3127  | Grlh3      | INSIDE                 | 0.454                                           | 0.536                            | 1452.22             | 779.08              | 0.243                            | 1232.79             | 300.01              |
| A_68_P23329327 | chr4:135129537-135129581                          | NM_001013756:-23   | Grlh3      | PROMOTER               | 0.639                                           | 0.499                            | 1064.11             | 531.15              | 0.319                            | 890.80              | 283.90              |
| A_68_P32337350 | chrX:38754572-38754616                            | NM_016886:114      | Gria3      | INSIDE                 | 0.212                                           | 10.544                           | 7878.95             | 83076.23            | 2.233                            | 3793.06             | 8470.29             |
| A_68_P32337351 | chrX:38754697-38754743                            | NM_016886:240      | Gria3      | INSIDE                 | 0.148                                           | 1.590                            | 1415.23             | 2249.72             | 0.236                            | 503.64              | 118.83              |
| A_68_P29531949 | chr14:35632705-35632749                           | NM_008166:-595     | Grid1      | PROMOTER               | 0.283                                           | 0.450                            | 1149.77             | 517.11              | 0.127                            | 930.75              | 118.36              |

| ProbeName      | Target position of probe on CpG island microarray | TargetID            | GeneSymbol | CpG island Description | Ratio of relative methylation (TiO2-NP/Vehicle) | Sham group                       |                     |                     | TiO <sub>2</sub> -H group        |                     |                     |
|----------------|---------------------------------------------------|---------------------|------------|------------------------|-------------------------------------------------|----------------------------------|---------------------|---------------------|----------------------------------|---------------------|---------------------|
|                |                                                   |                     |            |                        |                                                 | Relative methylation (Cy-5/Cy-3) | Cy-3 signal (Input) | Cy-5 signal (MeDIP) | Relative methylation (Cy-5/Cy-3) | Cy-3 signal (Input) | Cy-5 signal (MeDIP) |
| A_68_P29531954 | chr14:35633533-35633577                           | NM_008166:233       | Grid1      | INSIDE                 | 0.458                                           | 0.386                            | 1652.93             | 637.33              | 0.177                            | 1325.29             | 234.11              |
| A_68_P29531957 | chr14:35633864-35633908                           | NM_008166:565       | Grid1      | INSIDE                 | 0.054                                           | 1.338                            | 4410.16             | 5899.98             | 0.073                            | 2791.40             | 203.22              |
| A_68_P24501230 | chr6:63206331-63206375                            | NM_008167:-498      | Grid2      | PROMOTER               | 0.620                                           | 0.455                            | 1381.44             | 628.56              | 0.282                            | 1105.87             | 311.82              |
| A_68_P24501234 | chr6:63206775-63206826                            | NM_008167:-50       | Grid2      | PROMOTER               | 0.229                                           | 0.614                            | 1104.05             | 677.98              | 0.141                            | 870.04              | 122.35              |
| A_68_P24501236 | chr6:63206960-63207004                            | NM_008167:132       | Grid2      | INSIDE                 | 0.155                                           | 0.458                            | 2045.42             | 937.19              | 0.071                            | 1639.64             | 116.76              |
| A_68_P24156212 | chr5:144125779-144125823                          | NM_133355:214       | Grid2ip    | INSIDE                 | 0.168                                           | 0.457                            | 2012.18             | 919.98              | 0.077                            | 1609.33             | 123.26              |
| A_68_P24156213 | chr5:144125893-144125937                          | NM_133355:328       | Grid2ip    | INSIDE                 | 0.280                                           | 0.387                            | 1715.24             | 664.49              | 0.108                            | 1251.75             | 135.75              |
| A_68_P24156215 | chr5:144126161-144126205                          | NM_133355:596       | Grid2ip    | INSIDE                 | 0.091                                           | 0.658                            | 2795.15             | 1838.53             | 0.060                            | 1986.64             | 118.49              |
| A_68_P24156244 | chr5:144131752-144131796                          | NM_133355:6188      | Grid2ip    | INSIDE                 | 0.635                                           | 0.524                            | 1618.60             | 848.49              | 0.333                            | 1291.53             | 429.81              |
| A_68_P27127190 | chr10:49503177-49503221                           | NM_001111268:5362   | Grik2      | INSIDE                 | 0.229                                           | 0.713                            | 1333.07             | 950.48              | 0.163                            | 1153.25             | 188.08              |
| A_68_P23274589 | chr4:125167651-125167695                          | NM_001081097:-402   | Grik3      | PROMOTER               | 0.660                                           | 0.456                            | 1142.11             | 521.06              | 0.301                            | 986.64              | 297.01              |
| A_68_P23274592 | chr4:125168108-125168152                          | NM_001081097:56     | Grik3      | INSIDE                 | 0.320                                           | 0.504                            | 1342.14             | 676.59              | 0.161                            | 1178.43             | 190.25              |
| A_68_P23274595 | chr4:125168487-125168531                          | NM_001081097:434    | Grik3      | INSIDE                 | 0.651                                           | 0.648                            | 1355.65             | 879.12              | 0.422                            | 1100.74             | 464.36              |
| A_68_P26458363 | chr9:42705778-42705822                            | NM_175481:46654     | Grik4      | INSIDE                 | 0.302                                           | 0.618                            | 5699.87             | 3523.12             | 0.186                            | 3862.16             | 719.99              |
| A_68_P26458693 | chr9:42751946-42751990                            | NM_175481:486       | Grik4      | INSIDE                 | 0.511                                           | 1.462                            | 9798.38             | 14322.62            | 0.747                            | 6431.69             | 4805.55             |
| A_68_P26458695 | chr9:42752086-42752130                            | NM_175481:346       | Grik4      | INSIDE                 | 0.624                                           | 3.936                            | 10800.17            | 42505.35            | 2.454                            | 6227.14             | 15282.22            |
| A_68_P21071264 | chr2:25160798-25160842                            | NM_001177656:13863  | Grin1      | INSIDE                 | 0.160                                           | 0.513                            | 3294.87             | 1691.13             | 0.082                            | 2379.11             | 195.48              |
| A_68_P21071306 | chr2:25166855-25166901                            | NM_001177656:7805   | Grin1      | INSIDE                 | 0.328                                           | 0.573                            | 1554.63             | 890.80              | 0.188                            | 1255.65             | 236.24              |
| A_68_P21071362 | chr2:25174225-25174270                            | NM_001177656:436    | Grin1      | INSIDE                 | 0.092                                           | 0.738                            | 2525.73             | 1864.24             | 0.068                            | 1722.66             | 116.66              |
| A_68_P30540360 | chr16:9994787-9994831                             | NM_008170:-2182     | Grin2a     | PROMOTER               | 0.136                                           | 0.567                            | 1991.22             | 1129.72             | 0.077                            | 1490.93             | 115.17              |
| A_68_P24868563 | chr6:135683062-135683116                          | NM_008171:440441    | Grin2b     | INSIDE                 | 0.666                                           | 3.710                            | 1775.75             | 6588.79             | 2.471                            | 1180.46             | 2916.88             |
| A_68_P24868564 | chr6:135683145-135683189                          | NM_008171:440363    | Grin2b     | INSIDE                 | 0.507                                           | 4.190                            | 1333.07             | 5585.51             | 2.125                            | 917.72              | 1950.39             |
| A_68_P28152305 | chr11:115111838-115111882                         | NM_010350:16697     | Grin2c     | INSIDE                 | 0.283                                           | 0.446                            | 2260.91             | 1009.37             | 0.126                            | 1592.06             | 201.15              |
| A_68_P28152427 | chr11:115128177-115128221                         | NM_010350:359       | Grin2c     | INSIDE                 | 0.382                                           | 0.620                            | 2404.14             | 1491.55             | 0.237                            | 1860.09             | 440.44              |
| A_68_P25095384 | chr7:53087940-53087984                            | NM_008172:34089     | Grin2d     | INSIDE                 | 0.277                                           | 0.679                            | 1134.09             | 769.55              | 0.188                            | 911.54              | 171.57              |
| A_68_P25095548 | chr7:53121361-53121405                            | NM_008172:669       | Grin2d     | INSIDE                 | 0.594                                           | 0.662                            | 1402.91             | 929.37              | 0.394                            | 1222.04             | 480.94              |
| A_68_P22907353 | chr4:49858612-49858656                            | NM_001033351:-681   | Grin3a     | PROMOTER               | 0.114                                           | 0.735                            | 3348.02             | 2460.06             | 0.084                            | 2248.59             | 188.77              |
| A_68_P22907354 | chr4:49858702-49858746                            | NM_001033351:-771   | Grin3a     | PROMOTER               | 0.603                                           | 0.582                            | 1701.90             | 990.30              | 0.351                            | 1147.95             | 402.82              |
| A_68_P26622300 | chr9:71333407-71333451                            | NM_001164793:-663   | Grin1a     | PROMOTER               | 0.470                                           | 0.558                            | 1220.55             | 681.52              | 0.262                            | 1050.40             | 275.48              |
| A_68_P26622303 | chr9:71333818-71333862                            | NM_178602:-50       | Grin1a     | PROMOTER               | 0.434                                           | 0.403                            | 2113.33             | 851.67              | 0.175                            | 1713.63             | 299.51              |
| A_68_P23595699 | chr5:35003466-35003510                            | NM_001080743:461    | Grk4       | INSIDE                 | 0.645                                           | 0.613                            | 1008.96             | 618.42              | 0.395                            | 790.34              | 312.33              |
| A_68_P29055020 | chr13:55545946-55545990                           | NM_011938:-726      | Grk6       | PROMOTER               | 0.155                                           | 1.478                            | 810.86              | 1198.23             | 0.229                            | 513.73              | 117.72              |
| A_68_P29055022 | chr13:55546184-55546228                           | NM_011938:-488      | Grk6       | PROMOTER               | 0.103                                           | 0.639                            | 2723.94             | 1741.07             | 0.066                            | 1913.17             | 125.93              |
| A_68_P29055023 | chr13:55546318-55546369                           | NM_011938:-351      | Grk6       | PROMOTER               | 0.209                                           | 0.531                            | 1579.54             | 838.79              | 0.111                            | 1085.71             | 120.68              |
| A_68_P29055029 | chr13:55547182-55547226                           | NM_011938:510       | Grk6       | INSIDE                 | 0.183                                           | 0.473                            | 1651.20             | 780.85              | 0.087                            | 1384.51             | 119.97              |
| A_68_P24982506 | chr7:17200789-17200833                            | NM_172739:-468      | Grif1      | PROMOTER               | 0.320                                           | 0.468                            | 3258.55             | 1524.24             | 0.150                            | 2453.71             | 366.86              |
| A_68_P26936713 | chr10:10408926-10408970                           | NM_001114333:393181 | Grm1       | INSIDE                 | 0.280                                           | 0.386                            | 1984.50             | 765.94              | 0.108                            | 1707.58             | 184.84              |
| A_68_P26804413 | chr9:106558146-106558190                          | NM_001160353:272    | Grm2       | INSIDE                 | 0.564                                           | 0.574                            | 2025.33             | 1162.75             | 0.324                            | 1662.37             | 538.64              |
| A_68_P31116575 | chr17:27610002-27610046                           | NM_001013385:30225  | Grm4       | INSIDE                 | 0.623                                           | 4.118                            | 2069.05             | 8520.77             | 2.567                            | 1431.83             | 3675.22             |
| A_68_P31116576 | chr17:27610068-27610113                           | NM_001013385:30159  | Grm4       | INSIDE                 | 0.670                                           | 3.990                            | 4281.32             | 17081.76            | 2.671                            | 2957.50             | 7900.55             |
| A_68_P24743884 | chr6:110595643-110595687                          | NM_177328:73        | Grm7       | INSIDE                 | 0.247                                           | 0.626                            | 3444.15             | 2155.10             | 0.155                            | 2719.05             | 420.72              |
| A_68_P24318684 | chr6:28083743-28083787                            | NM_008174:605       | Grm8       | INSIDE                 | 0.609                                           | 0.544                            | 1165.14             | 633.31              | 0.331                            | 960.59              | 317.93              |
| A_68_P24318697 | chr6:28085365-28085421                            | NM_008174:-1023     | Grm8       | PROMOTER               | 0.370                                           | 0.524                            | 1001.98             | 525.21              | 0.194                            | 878.10              | 170.48              |
| A_68_P23607762 | chr5:36807361-36807405                            | NM_024478:-451      | Grpel1     | PROMOTER               | 0.172                                           | 0.684                            | 1366.16             | 935.00              | 0.118                            | 985.94              | 115.89              |

| ProbeName      | Target position of probe on CpG island microarray | TargetID          | GeneSymbol    | CpG island Description | Ratio of relative methylation (TiO2-NP/Vehicle) | Sham group                       |                     |                     | TiO <sub>2</sub> -H group        |                     |                     |
|----------------|---------------------------------------------------|-------------------|---------------|------------------------|-------------------------------------------------|----------------------------------|---------------------|---------------------|----------------------------------|---------------------|---------------------|
|                |                                                   |                   |               |                        |                                                 | Relative methylation (Cy-5/Cy-3) | Cy-3 signal (Input) | Cy-5 signal (MeDIP) | Relative methylation (Cy-5/Cy-3) | Cy-3 signal (Input) | Cy-5 signal (MeDIP) |
| A_68_P23607763 | chr5:36807446-36807491                            | NM_024478:-365    | Grpel1        | PROMOTER               | 0.357                                           | 0.541                            | 3092.77             | 1672.04             | 0.193                            | 2365.57             | 457.16              |
| A_68_P25095367 | chr7:53085924-53085970                            | NM_153419:213     | Grwd1         | INSIDE                 | 0.188                                           | 0.503                            | 2503.33             | 1260.16             | 0.095                            | 1743.64             | 165.37              |
| A_68_P25095368 | chr7:53086086-53086130                            | NM_153419:51      | Grwd1         | INSIDE                 | 0.265                                           | 0.603                            | 866.65              | 522.86              | 0.160                            | 750.00              | 119.92              |
| A_68_P28703487 | chr12:105711415-105711459                         | NM_010351:10      | Gsc           | INSIDE                 | 0.322                                           | 0.584                            | 988.58              | 576.92              | 0.188                            | 823.69              | 154.66              |
| A_68_P30344599 | chr15:75692883-75692927                           | NM_026960:136     | Gsdmd         | INSIDE                 | 0.545                                           | 0.654                            | 1225.36             | 800.98              | 0.356                            | 892.64              | 317.78              |
| A_68_P26220482 | chr8:123011851-123011906                          | NM_198671:-887    | Gse1          | PROMOTER               | 0.233                                           | 0.659                            | 1206.07             | 794.68              | 0.154                            | 959.89              | 147.68              |
| A_68_P26220486 | chr8:123012400-123012445                          | NM_198671:-343    | Gse1          | PROMOTER               | 0.370                                           | 0.631                            | 1511.00             | 953.06              | 0.233                            | 993.55              | 231.90              |
| A_68_P27915399 | chr11:72951333-72951377                           | NM_010353:442     | Gsg2          | INSIDE                 | 0.668                                           | 0.643                            | 1027.53             | 660.99              | 0.430                            | 834.13              | 358.28              |
| A_68_P30684006 | chr16:38089070-38089114                           | NM_019827:6       | Gsk3b         | INSIDE                 | 0.422                                           | 0.648                            | 2453.27             | 1589.87             | 0.274                            | 1758.48             | 480.99              |
| A_68_P21132485 | chr2:35111777-35111821                            | NM_001206367:-80  | Gsn           | PROMOTER               | 0.391                                           | 0.613                            | 2026.14             | 1242.11             | 0.240                            | 1463.14             | 350.71              |
| A_68_P21132488 | chr2:35112210-35112254                            | NM_001206367:354  | Gsn           | INSIDE                 | 0.540                                           | 0.606                            | 1346.80             | 816.75              | 0.328                            | 1093.01             | 358.22              |
| A_68_P30547081 | chr16:11253703-11253747                           | NM_001130008:694  | Gspt1         | INSIDE                 | 0.304                                           | 0.491                            | 2163.25             | 1062.04             | 0.149                            | 1863.27             | 278.48              |
| A_68_P30547086 | chr16:11254244-11254288                           | NM_001130008:152  | Gspt1         | INSIDE                 | 0.280                                           | 0.440                            | 2981.65             | 1312.19             | 0.123                            | 2199.17             | 271.37              |
| A_68_P30547087 | chr16:11254371-11254415                           | NM_001130008:26   | Gspt1         | INSIDE                 | 0.577                                           | 0.614                            | 3031.98             | 1860.73             | 0.354                            | 2326.81             | 824.29              |
| A_68_P21766452 | chr2:155418422-155418466                          | NM_008180:-2      | Gss           | PROMOTER               | 0.447                                           | 0.552                            | 1662.28             | 917.93              | 0.247                            | 1326.07             | 327.25              |
| A_68_P32152397 | chr19:47939957-47940001                           | NM_030051:-56     | Gsto2         | PROMOTER               | 0.331                                           | 0.475                            | 1378.65             | 655.14              | 0.157                            | 998.53              | 156.94              |
| A_68_P27258887 | chr10:75299960-75300008                           | NM_010361:-2358   | Gstt2         | PROMOTER               | 0.491                                           | 0.664                            | 1469.45             | 975.94              | 0.326                            | 1161.91             | 379.01              |
| A_68_P28614428 | chr12:88487974-88488018                           | NM_010363:-671    | Gstz1         | PROMOTER               | 0.325                                           | 0.678                            | 2336.86             | 1583.57             | 0.220                            | 1908.15             | 420.14              |
| A_68_P28614430 | chr12:88488238-88488282                           | NM_010363:-407    | Gstz1         | PROMOTER               | 0.526                                           | 0.678                            | 1114.53             | 755.34              | 0.356                            | 977.63              | 348.19              |
| A_68_P28614433 | chr12:88488594-88488639                           | NM_010363:-51     | Gstz1         | PROMOTER               | 0.146                                           | 0.613                            | 1975.54             | 1211.73             | 0.089                            | 1383.70             | 123.75              |
| A_68_P24172322 | chr5:148001001-148001045                          | NM_008178:751     | Gsx1          | INSIDE                 | 0.417                                           | 0.428                            | 1713.77             | 732.81              | 0.178                            | 1429.29             | 255.11              |
| A_68_P23807224 | chr5:75471627-75471671                            | NM_133256:23      | Gsx2          | INSIDE                 | 0.292                                           | 0.511                            | 2343.80             | 1198.27             | 0.149                            | 1839.49             | 274.26              |
| A_68_P23807225 | chr5:75471780-75471824                            | NM_133256:177     | Gsx2          | INSIDE                 | 0.081                                           | 0.449                            | 4540.07             | 2039.43             | 0.037                            | 3157.80             | 115.28              |
| A_68_P23807226 | chr5:75471874-75471918                            | NM_133256:271     | Gsx2          | INSIDE                 | 0.263                                           | 0.572                            | 2189.19             | 1251.64             | 0.150                            | 1679.14             | 252.11              |
| A_68_P23807227 | chr5:75471945-75471989                            | NM_133256:341     | Gsx2          | INSIDE                 | 0.649                                           | 0.448                            | 1377.26             | 616.42              | 0.291                            | 1001.14             | 290.99              |
| A_68_P23807228 | chr5:75472072-75472116                            | NM_133256:469     | Gsx2          | INSIDE                 | 0.668                                           | 0.707                            | 2024.06             | 1430.51             | 0.472                            | 1638.57             | 773.77              |
| A_68_P24757355 | chr6:113027040-113027084                          | NR_027010:176     | Gt(ROSA)26Sor | INSIDE                 | 0.607                                           | 0.391                            | 1817.88             | 711.35              | 0.238                            | 1389.91             | 330.26              |
| A_68_P28635712 | chr12:92826632-92826677                           | NM_031391:1435    | Gtf2a1        | INSIDE                 | 0.663                                           | 0.683                            | 1034.83             | 706.39              | 0.453                            | 948.48              | 429.29              |
| A_68_P22592456 | chr3:142428233-142428277                          | NM_145546:44      | Gtf2b         | INSIDE                 | 0.450                                           | 0.642                            | 847.40              | 544.06              | 0.289                            | 819.62              | 236.77              |
| A_68_P31259555 | chr17:57150392-57150436                           | NM_133801:297     | Gtf2f1        | INSIDE                 | 0.114                                           | 0.510                            | 2824.94             | 1442.11             | 0.058                            | 2016.32             | 117.47              |
| A_68_P25101371 | chr7:54051634-54051678                            | NM_008186:193     | Gtf2h1        | INSIDE                 | 0.663                                           | 0.589                            | 1266.18             | 745.54              | 0.391                            | 959.92              | 374.94              |
| A_68_P29268695 | chr13:101262403-101262447                         | NM_022011:140     | Gtf2h2        | INSIDE                 | 0.610                                           | 0.714                            | 3258.92             | 2328.09             | 0.435                            | 2502.66             | 1089.91             |
| A_68_P24112565 | chr5:134789851-134789895                          | NM_001080746:744  | Gtf2i         | INSIDE                 | 0.402                                           | 0.714                            | 2256.93             | 1612.52             | 0.287                            | 1769.13             | 508.52              |
| A_68_P24112568 | chr5:134790208-134790252                          | NM_001080746:386  | Gtf2i         | INSIDE                 | 0.617                                           | 0.617                            | 2532.59             | 1563.75             | 0.381                            | 2013.74             | 767.02              |
| A_68_P24111875 | chr5:134660308-134660352                          | NM_053266:423     | Gtf2ird2      | INSIDE                 | 0.618                                           | 0.494                            | 2700.07             | 1333.23             | 0.305                            | 2069.94             | 631.95              |
| A_68_P24111876 | chr5:134660418-134660462                          | NM_053266:533     | Gtf2ird2      | INSIDE                 | 0.299                                           | 0.639                            | 1141.25             | 728.79              | 0.191                            | 838.54              | 160.37              |
| A_68_P25496221 | chr7:132850823-132850867                          | NM_207239:358     | Gtf3e1        | INSIDE                 | 0.239                                           | 0.572                            | 4038.57             | 2311.41             | 0.137                            | 2902.89             | 397.17              |
| A_68_P23576909 | chr5:31481980-31482025                            | NM_027901:515     | Gtf3e2        | INSIDE                 | 0.327                                           | 0.613                            | 948.93              | 581.83              | 0.201                            | 714.94              | 143.48              |
| A_68_P21093572 | chr2:28695445-28695489                            | NM_001166033:414  | Gtf3e4        | INSIDE                 | 0.490                                           | 0.542                            | 1010.39             | 547.18              | 0.265                            | 800.93              | 212.35              |
| A_68_P21092001 | chr2:28438373-28438417                            | NM_148928:405     | Gtf3e5        | INSIDE                 | 0.121                                           | 0.596                            | 2181.26             | 1299.59             | 0.072                            | 1686.92             | 121.48              |
| A_68_P27083090 | chr10:39977304-39977348                           | NM_026113:145     | Gtf3e6        | INSIDE                 | 0.660                                           | 0.706                            | 1785.25             | 1261.18             | 0.466                            | 1542.72             | 718.81              |
| A_68_P30367930 | chr15:79521605-79521649                           | NM_013818:301     | Gtppb1        | INSIDE                 | 0.639                                           | 0.354                            | 2153.79             | 762.88              | 0.226                            | 1851.95             | 418.93              |
| A_68_P31205408 | chr17:46297849-46297904                           | NM_001145979:-104 | Gtppb2        | DIVERGENT_PROMOTER     | 0.243                                           | 0.545                            | 1351.33             | 735.85              | 0.132                            | 916.38              | 121.11              |
| A_68_P25957090 | chr8:74012768-74012812                            | NM_032544:789     | Gtppb3        | INSIDE                 | 0.227                                           | 0.615                            | 1880.96             | 1156.69             | 0.140                            | 1471.00             | 205.56              |



| ProbeName      | Target position of probe on CpG island microarray | TargetID          | GeneSymbol | CpG island Description | Ratio of relative methylation (TiO2-NP/Vehicle) | Sham group                       |                     |                     | TiO <sub>2</sub> -H group        |                     |                     |
|----------------|---------------------------------------------------|-------------------|------------|------------------------|-------------------------------------------------|----------------------------------|---------------------|---------------------|----------------------------------|---------------------|---------------------|
|                |                                                   |                   |            |                        |                                                 | Relative methylation (Cy-5/Cy-3) | Cy-3 signal (Input) | Cy-5 signal (MeDIP) | Relative methylation (Cy-5/Cy-3) | Cy-3 signal (Input) | Cy-5 signal (MeDIP) |
| A_68_P25957092 | chr8:74012930-74012974                            | NM_032544:951     | Gtbbp3     | INSIDE                 | 0.322                                           | 0.566                            | 904.37              | 511.45              | 0.182                            | 668.64              | 121.76              |
| A_68_P21901246 | chr2:179805450-179805494                          | NM_001083328:175  | Gtbbp5     | INSIDE                 | 0.606                                           | 0.631                            | 1197.29             | 756.00              | 0.382                            | 882.63              | 337.49              |
| A_68_P23977818 | chr5:110536465-110536509                          | NM_145147:730     | Gtbbp6     | INSIDE                 | 0.233                                           | 1.433                            | 6337.49             | 9079.31             | 0.334                            | 4296.42             | 1435.34             |
| A_68_P23977819 | chr5:110536642-110536688                          | NM_145147:552     | Gtbbp6     | INSIDE                 | 0.191                                           | 1.714                            | 11771.56            | 20172.69            | 0.327                            | 7593.94             | 2486.50             |
| A_68_P23977821 | chr5:110536870-110536914                          | NM_145147:324     | Gtbbp6     | INSIDE                 | 0.260                                           | 0.481                            | 1316.34             | 632.71              | 0.125                            | 935.37              | 116.70              |
| A_68_P23778450 | chr5:69947976-69948020                            | NM_172711:-182    | Gulf1      | PROMOTER               | 0.189                                           | 0.647                            | 2022.79             | 1308.46             | 0.122                            | 1565.78             | 191.15              |
| A_68_P20193920 | chr1:44608775-44608819                            | NM_028450:281     | Gulp1      | INSIDE                 | 0.596                                           | 0.647                            | 1750.20             | 1133.25             | 0.386                            | 1417.05             | 547.02              |
| A_68_P20193921 | chr1:44608865-44608909                            | NM_028450:371     | Gulp1      | INSIDE                 | 0.443                                           | 0.456                            | 2276.31             | 1037.24             | 0.202                            | 1793.04             | 362.10              |
| A_68_P30446023 | chr15:93105424-93105468                           | NM_001033275:69   | Gxylt1     | INSIDE                 | 0.512                                           | 0.475                            | 1298.36             | 616.26              | 0.243                            | 1064.07             | 258.39              |
| A_68_P30446028 | chr15:93106155-93106199                           | NM_001033275:-661 | Gxylt1     | PROMOTER               | 0.308                                           | 0.455                            | 1295.48             | 589.24              | 0.140                            | 915.10              | 128.11              |
| A_68_P32507213 | chrX:83022104-83022148                            | NM_008194:32      | Gyk        | INSIDE                 | 0.136                                           | 3.630                            | 4744.25             | 17219.68            | 0.495                            | 1881.94             | 930.63              |
| A_68_P21428049 | chr2:92210891-92210935                            | NM_001166633:281  | Gylt1b     | INSIDE                 | 0.411                                           | 0.603                            | 2316.06             | 1395.78             | 0.247                            | 1656.29             | 409.93              |
| A_68_P31603480 | chr18:32719536-32719580                           | NM_001048207:130  | Gype       | INSIDE                 | 0.314                                           | 0.565                            | 2544.38             | 1437.98             | 0.178                            | 2085.18             | 370.43              |
| A_68_P31603481 | chr18:32719632-32719687                           | NM_001048207:29   | Gype       | INSIDE                 | 0.144                                           | 0.652                            | 1678.83             | 1095.19             | 0.094                            | 1275.87             | 119.70              |
| A_68_P25093127 | chr7:52690084-52690132                            | NM_030678:-100    | Gys1       | DIVERGENT_PROMOTER     | 0.139                                           | 0.698                            | 1559.87             | 1088.21             | 0.097                            | 1260.83             | 122.64              |
| A_68_P24904452 | chr6:142363210-142363254                          | NM_145572:58397   | Gys2       | DOWNSTREAM             | 0.503                                           | 0.413                            | 1462.01             | 604.36              | 0.208                            | 1226.68             | 255.18              |
| A_68_P21731577 | chr2:148506945-148506989                          | NM_028986:111     | Gzf1       | INSIDE                 | 0.642                                           | 0.737                            | 2375.53             | 1750.12             | 0.473                            | 1693.37             | 800.84              |
| A_68_P24619080 | chr6:87930668-87930712                            | NM_198622:786     | H1fx       | INSIDE                 | 0.488                                           | 0.604                            | 2033.85             | 1228.42             | 0.295                            | 1860.91             | 548.16              |
| A_68_P24619081 | chr6:87930736-87930780                            | NM_198622:718     | H1fx       | INSIDE                 | 0.250                                           | 0.348                            | 1708.96             | 594.22              | 0.087                            | 1402.74             | 121.79              |
| A_68_P31152954 | chr17:34401924-34401968                           | NM_207105:1775    | H2-Ab1     | INSIDE                 | 0.284                                           | 0.659                            | 7394.39             | 4874.37             | 0.187                            | 5405.93             | 1010.72             |
| A_68_P24874512 | chr6:136757288-136757338                          | NM_177688:544     | H2afj      | INSIDE                 | 0.129                                           | 1.345                            | 3864.97             | 5199.27             | 0.173                            | 2528.08             | 438.36              |
| A_68_P26467074 | chr9:44143508-44143552                            | NM_010436:733     | H2afz      | INSIDE                 | 0.568                                           | 0.539                            | 1039.19             | 560.28              | 0.306                            | 869.37              | 266.17              |
| A_68_P22565463 | chr3:137527117-137527161                          | NM_016750:-424    | H2afz      | PROMOTER               | 0.534                                           | 0.415                            | 2737.64             | 1135.15             | 0.221                            | 2273.51             | 503.52              |
| A_68_P22565473 | chr3:137528589-137528633                          | NM_016750:1048    | H2afz      | INSIDE                 | 0.384                                           | 0.459                            | 1411.87             | 647.69              | 0.176                            | 1140.22             | 200.77              |
| A_68_P31159075 | chr17:35516634-35516678                           | NM_001143689:95   | H2-Gs10    | INSIDE                 | 0.277                                           | 0.546                            | 1820.45             | 993.97              | 0.151                            | 1377.83             | 208.43              |
| A_68_P31151371 | chr17:34115239-34115283                           | NR_004446:476     | H2-K2      | INSIDE                 | 0.407                                           | 0.456                            | 1605.18             | 731.55              | 0.185                            | 1385.24             | 256.72              |
| A_68_P31151376 | chr17:34115729-34115774                           | NR_004446:-15     | H2-K2      | DIVERGENT_PROMOTER     | 0.586                                           | 0.479                            | 1184.32             | 567.85              | 0.281                            | 896.88              | 252.05              |
| A_68_P31151132 | chr17:34077320-34077372                           | NM_010385:-58     | H2-Ke2     | DIVERGENT_PROMOTER     | 0.271                                           | 0.578                            | 903.23              | 522.05              | 0.157                            | 775.07              | 121.60              |
| A_68_P31166661 | chr17:37125639-37125683                           | NM_001115075:789  | H2-M5      | INSIDE                 | 0.301                                           | 0.729                            | 2275.44             | 1658.37             | 0.220                            | 1770.73             | 388.90              |
| A_68_P31158870 | chr17:35457706-35457750                           | NM_010390:226     | H2-Q1      | INSIDE                 | 0.603                                           | 0.547                            | 1166.12             | 638.01              | 0.330                            | 983.84              | 324.67              |
| A_68_P31159261 | chr17:35606907-35606951                           | NM_010391:-105    | H2-Q10     | PROMOTER               | 0.302                                           | 0.564                            | 1180.89             | 666.38              | 0.170                            | 1060.75             | 180.49              |
| A_68_P20877853 | chr11:182724319-182724363                         | NM_008210:19394   | H3f3a      | DOWNSTREAM             | 0.645                                           | 0.523                            | 1074.31             | 561.60              | 0.337                            | 838.95              | 282.98              |
| A_68_P25186204 | chr7:73224455-73224499                            | NM_024439:-58     | H47        | PROMOTER               | 0.308                                           | 0.449                            | 1540.45             | 691.17              | 0.138                            | 1180.55             | 163.11              |
| A_68_P22531297 | chr3:130974718-130974765                          | NM_008212:214     | Hadh       | INSIDE                 | 0.151                                           | 0.468                            | 2361.74             | 1105.35             | 0.071                            | 1734.32             | 122.67              |
| A_68_P23571063 | chr5:30481709-30481753                            | NM_145558:-131    | Hadhb      | DIVERGENT_PROMOTER     | 0.206                                           | 0.550                            | 1400.06             | 770.27              | 0.114                            | 1102.29             | 125.21              |
| A_68_P23571064 | chr5:30481871-30481915                            | NM_145558:31      | Hadhb      | INSIDE                 | 0.177                                           | 0.509                            | 3436.32             | 1749.92             | 0.090                            | 2549.02             | 229.29              |
| A_68_P23571065 | chr5:30481976-30482020                            | NM_145558:137     | Hadhb      | INSIDE                 | 0.158                                           | 0.608                            | 1512.98             | 919.33              | 0.096                            | 1222.17             | 117.62              |
| A_68_P23571066 | chr5:30482087-30482136                            | NM_145558:250     | Hadhb      | INSIDE                 | 0.271                                           | 0.517                            | 1092.18             | 565.12              | 0.140                            | 831.66              | 116.82              |
| A_68_P23571067 | chr5:30482177-30482221                            | NM_145558:337     | Hadhb      | INSIDE                 | 0.395                                           | 0.651                            | 971.59              | 632.21              | 0.257                            | 751.39              | 193.05              |
| A_68_P31099857 | chr17:24987665-24987709                           | NM_001159626:75   | Hagh       | INSIDE                 | 0.410                                           | 0.628                            | 1229.78             | 771.74              | 0.257                            | 1042.21             | 268.16              |
| A_68_P27827732 | chr11:57641072-57641118                           | NM_008213:4555    | Hand1      | DOWNSTREAM             | 0.050                                           | 1.535                            | 4642.97             | 7127.85             | 0.077                            | 2995.31             | 230.27              |
| A_68_P27827763 | chr11:57644849-57644893                           | NM_008213:779     | Hand1      | INSIDE                 | 0.316                                           | 0.473                            | 1204.13             | 569.65              | 0.150                            | 795.06              | 118.89              |
| A_68_P27827764 | chr11:57644954-57644998                           | NM_008213:673     | Hand1      | INSIDE                 | 0.239                                           | 0.588                            | 1092.67             | 642.27              | 0.140                            | 841.67              | 118.22              |
| A_68_P25890515 | chr8:59799750-59799801                            | NM_010402:-4      | Hand2      | PROMOTER               | 0.238                                           | 0.673                            | 1746.30             | 1175.90             | 0.160                            | 1357.53             | 217.41              |

| ProbeName      | Target position of probe on CpG island microarray | TargetID           | GeneSymbol | CpG island Description | Ratio of relative methylation (TiO2-NP/Vehicle) | Sham group                       |                     |                     | TiO <sub>2</sub> -H group        |                     |                     |
|----------------|---------------------------------------------------|--------------------|------------|------------------------|-------------------------------------------------|----------------------------------|---------------------|---------------------|----------------------------------|---------------------|---------------------|
|                |                                                   |                    |            |                        |                                                 | Relative methylation (Cy-5/Cy-3) | Cy-3 signal (Input) | Cy-5 signal (MeDIP) | Relative methylation (Cy-5/Cy-3) | Cy-3 signal (Input) | Cy-5 signal (MeDIP) |
| A_68_P28067607 | chr11:100216626-100216670                         | NM_010404:807      | Hap1       | INSIDE                 | 0.662                                           | 0.663                            | 931.14              | 617.47              | 0.439                            | 778.26              | 341.72              |
| A_68_P28067610 | chr11:100216965-100217009                         | NM_010404:469      | Hap1       | INSIDE                 | 0.197                                           | 0.415                            | 1901.36             | 788.50              | 0.082                            | 1501.29             | 122.56              |
| A_68_P28067614 | chr11:100217488-100217532                         | NM_010404:-55      | Hap1       | PROMOTER               | 0.448                                           | 0.575                            | 1133.08             | 651.98              | 0.258                            | 869.63              | 224.19              |
| A_68_P28067617 | chr11:100217870-100217915                         | NM_010404:-437     | Hap1       | PROMOTER               | 0.266                                           | 0.581                            | 1057.03             | 614.11              | 0.155                            | 816.69              | 126.42              |
| A_68_P22311349 | chr3:87826614-87826658                            | NM_022031:4797     | Hapln2     | INSIDE                 | 0.571                                           | 0.590                            | 1205.66             | 710.99              | 0.337                            | 1032.84             | 347.79              |
| A_68_P22311351 | chr3:87826838-87826882                            | NM_022031:4573     | Hapln2     | INSIDE                 | 0.143                                           | 0.622                            | 5199.28             | 3233.76             | 0.089                            | 3528.41             | 314.89              |
| A_68_P22311355 | chr3:87827371-87827415                            | NM_022031:4041     | Hapln2     | INSIDE                 | 0.459                                           | 0.567                            | 2341.18             | 1326.68             | 0.260                            | 1900.76             | 493.92              |
| A_68_P22311356 | chr3:87827542-87827586                            | NM_022031:3869     | Hapln2     | INSIDE                 | 0.396                                           | 0.664                            | 2761.76             | 1833.73             | 0.263                            | 1981.97             | 520.78              |
| A_68_P22311357 | chr3:87827642-87827686                            | NM_022031:3769     | Hapln2     | INSIDE                 | 0.507                                           | 0.621                            | 1291.59             | 802.02              | 0.315                            | 1091.23             | 343.72              |
| A_68_P25949749 | chr8:72610964-72611013                            | NM_177900:3561     | Hapln4     | INSIDE                 | 0.131                                           | 0.627                            | 1941.82             | 1218.02             | 0.082                            | 1464.96             | 120.13              |
| A_68_P21319207 | chr2:71227345-71227389                            | NM_026115:50       | Hat1       | INSIDE                 | 0.303                                           | 0.421                            | 1296.44             | 545.81              | 0.128                            | 1004.31             | 128.31              |
| A_68_P31849647 | chr18:78006501-78006545                           | NM_146089:-3       | Haus1      | DIVERGENT_PROMOTER     | 0.620                                           | 0.536                            | 1708.20             | 915.30              | 0.332                            | 1483.02             | 493.02              |
| A_68_P21576348 | chr2:120454904-120454948                          | NM_025475:19755    | Haus2      | DOWNSTREAM             | 0.244                                           | 0.697                            | 3304.90             | 2303.35             | 0.170                            | 2438.74             | 414.22              |
| A_68_P23592734 | chr5:34511815-34511865                            | NM_146159:233      | Haus3      | INSIDE                 | 0.267                                           | 0.517                            | 1113.92             | 576.21              | 0.138                            | 872.87              | 120.52              |
| A_68_P23592735 | chr5:34511958-34512002                            | NM_146159:93       | Haus3      | INSIDE                 | 0.360                                           | 0.510                            | 2132.18             | 1087.18             | 0.184                            | 1650.10             | 303.13              |
| A_68_P31624334 | chr18:36675661-36675705                           | NM_010415:-223     | Hbegf      | PROMOTER               | 0.590                                           | 0.491                            | 2047.62             | 1006.16             | 0.290                            | 1646.99             | 477.39              |
| A_68_P22405342 | chr3:107082078-107082122                          | NM_026774:325      | Hbxip      | INSIDE                 | 0.625                                           | 0.467                            | 1942.45             | 907.77              | 0.292                            | 1409.57             | 411.88              |
| A_68_P22405343 | chr3:107082203-107082254                          | NM_026774:453      | Hbxip      | INSIDE                 | 0.195                                           | 0.715                            | 1392.62             | 996.07              | 0.139                            | 971.40              | 135.42              |
| A_68_P22405344 | chr3:107082299-107082343                          | NM_026774:545      | Hbxip      | INSIDE                 | 0.606                                           | 0.598                            | 1435.14             | 858.53              | 0.363                            | 1185.10             | 429.74              |
| A_68_P32465786 | chrX:71211813-71211857                            | NM_008224:-180     | Hcfc1      | PROMOTER               | 0.092                                           | 2.410                            | 2382.95             | 5743.18             | 0.221                            | 857.36              | 189.12              |
| A_68_P32465787 | chrX:71211906-71211951                            | NM_008224:-274     | Hcfc1      | PROMOTER               | 0.066                                           | 2.773                            | 1632.69             | 4527.60             | 0.183                            | 670.10              | 122.34              |
| A_68_P27278459 | chr10:79180444-79180488                           | NM_008226:1088     | Hcn2       | INSIDE                 | 0.656                                           | 0.655                            | 1170.31             | 766.08              | 0.429                            | 940.59              | 403.81              |
| A_68_P22317567 | chr3:88963692-88963736                            | NM_008227:365      | Hcn3       | INSIDE                 | 0.508                                           | 0.589                            | 1460.91             | 861.08              | 0.299                            | 1216.82             | 364.27              |
| A_68_P26550024 | chr9:58670000-58670044                            | NM_001081192:-1296 | Hcn4       | PROMOTER               | 0.105                                           | 0.624                            | 2513.84             | 1568.23             | 0.066                            | 1872.85             | 123.09              |
| A_68_P23300617 | chr4:129816677-129816721                          | NM_198959:-292     | Hcrt1      | PROMOTER               | 0.606                                           | 0.656                            | 1169.89             | 767.48              | 0.397                            | 941.02              | 373.98              |
| A_68_P23297198 | chr4:129219482-129219532                          | NM_008228:384      | Hdac1      | INSIDE                 | 0.080                                           | 1.379                            | 1454.66             | 2006.33             | 0.110                            | 1059.73             | 116.49              |
| A_68_P24637118 | chr6:91106557-91106606                            | NM_144919:-227     | Hdac1      | PROMOTER               | 0.586                                           | 0.551                            | 945.08              | 520.85              | 0.323                            | 768.25              | 248.10              |
| A_68_P24637122 | chr6:91107049-91107096                            | NM_144919:264      | Hdac1      | INSIDE                 | 0.034                                           | 1.864                            | 2902.03             | 5408.58             | 0.064                            | 1920.46             | 122.60              |
| A_68_P27067366 | chr10:36694758-36694802                           | NM_008229:431      | Hdac2      | INSIDE                 | 0.225                                           | 0.338                            | 1989.68             | 672.65              | 0.076                            | 1573.38             | 119.47              |
| A_68_P31631084 | chr18:38114429-38114473                           | NM_010411:192      | Hdac3      | INSIDE                 | 0.045                                           | 2.035                            | 2056.96             | 4186.80             | 0.091                            | 1314.65             | 119.16              |
| A_68_P31631086 | chr18:38114645-38114689                           | NM_010411:-24      | Hdac3      | DIVERGENT_PROMOTER     | 0.640                                           | 0.468                            | 2185.66             | 1021.91             | 0.299                            | 1667.69             | 499.29              |
| A_68_P32241075 | chrX:7525044-7525088                              | NM_001130416:-51   | Hdac6      | PROMOTER               | 0.112                                           | 2.703                            | 4241.32             | 11465.94            | 0.303                            | 1528.29             | 462.44              |
| A_68_P32241078 | chrX:7525375-7525419                              | NM_001130416:-381  | Hdac6      | PROMOTER               | 0.113                                           | 1.621                            | 1528.19             | 2476.52             | 0.183                            | 636.95              | 116.45              |
| A_68_P27043768 | chr10:31033252-31033296                           | NM_027168:64       | Hddc2      | INSIDE                 | 0.439                                           | 0.610                            | 1176.36             | 717.39              | 0.267                            | 887.91              | 237.48              |
| A_68_P31253725 | chr17:56218817-56218862                           | NM_008233:-240     | Hdgifp2    | DIVERGENT_PROMOTER     | 0.230                                           | 2.071                            | 10447.06            | 21635.33            | 0.476                            | 6921.80             | 3296.94             |
| A_68_P25274807 | chr7:89078453-89078497                            | NM_013886:871      | Hdgifp3    | INSIDE                 | 0.241                                           | 0.657                            | 1393.32             | 915.63              | 0.159                            | 1078.97             | 171.14              |
| A_68_P22964786 | chr4:62163240-62163284                            | NM_024257:-28      | Hdh3       | PROMOTER               | 0.209                                           | 0.526                            | 4534.31             | 2384.03             | 0.110                            | 3319.07             | 364.93              |
| A_68_P20455838 | chr1:95375093-95375137                            | NM_133808:271      | Hdlbp      | INSIDE                 | 0.603                                           | 0.536                            | 1707.94             | 915.49              | 0.323                            | 1274.21             | 411.62              |
| A_68_P28831963 | chr13:12488087-12488132                           | NM_144835:468      | Heat1      | INSIDE                 | 0.448                                           | 0.645                            | 1517.25             | 978.13              | 0.289                            | 1224.65             | 353.51              |
| A_68_P24133859 | chr5:139625867-139625911                          | NM_001081265:-288  | Heat2      | PROMOTER               | 0.493                                           | 3.006                            | 10901.91            | 32770.22            | 1.481                            | 6902.72             | 10221.18            |
| A_68_P28432638 | chr12:53072168-53072212                           | NM_177171:118      | Heat5a     | INSIDE                 | 0.648                                           | 0.462                            | 1801.20             | 832.51              | 0.300                            | 1625.66             | 487.10              |
| A_68_P31373925 | chr17:79234724-79234768                           | NM_001081179:-25   | Heat5b     | DIVERGENT_PROMOTER     | 0.162                                           | 0.613                            | 1688.00             | 1035.56             | 0.100                            | 1290.76             | 128.53              |
| A_68_P27973306 | chr11:83567372-83567416                           | NM_145432:256      | Heat6      | INSIDE                 | 0.494                                           | 0.358                            | 1511.56             | 541.48              | 0.177                            | 1255.91             | 222.24              |
| A_68_P27973307 | chr11:83567440-83567484                           | NM_145432:324      | Heat6      | INSIDE                 | 0.529                                           | 0.647                            | 1670.46             | 1080.41             | 0.342                            | 1291.74             | 441.55              |

| ProbeName      | Target position of probe on CpG island microarray | TargetID           | GeneSymbol | CpG island Description | Ratio of relative methylation (TiO2-NP/Vehicle) | Sham group                       |                     |                     | TiO <sub>2</sub> -H group        |                     |                     |
|----------------|---------------------------------------------------|--------------------|------------|------------------------|-------------------------------------------------|----------------------------------|---------------------|---------------------|----------------------------------|---------------------|---------------------|
|                |                                                   |                    |            |                        |                                                 | Relative methylation (Cy-5/Cy-3) | Cy-3 signal (Input) | Cy-5 signal (MeDIP) | Relative methylation (Cy-5/Cy-3) | Cy-3 signal (Input) | Cy-5 signal (MeDIP) |
| A_68_P32090696 | chr19:36628500-36628544                           | NM_001163471:-606  | Hectd2     | PROMOTER               | 0.187                                           | 0.620                            | 3761.43             | 2332.90             | 0.116                            | 2595.28             | 301.48              |
| A_68_P32090697 | chr19:36628656-36628700                           | NM_001163471:-450  | Hectd2     | PROMOTER               | 0.159                                           | 0.673                            | 1365.57             | 918.67              | 0.107                            | 1113.34             | 118.88              |
| A_68_P32090698 | chr19:36628741-36628785                           | NM_001163471:-366  | Hectd2     | PROMOTER               | 0.489                                           | 0.595                            | 2248.85             | 1337.14             | 0.291                            | 1664.63             | 483.79              |
| A_68_P32090702 | chr19:36629470-36629514                           | NM_001163471:364   | Hectd2     | INSIDE                 | 0.404                                           | 0.272                            | 2373.47             | 646.01              | 0.110                            | 1953.97             | 214.88              |
| A_68_P23231911 | chr4:116668335-116668379                          | NM_175244:404      | Hectd3     | INSIDE                 | 0.267                                           | 0.459                            | 1858.83             | 853.81              | 0.123                            | 1602.86             | 196.92              |
| A_68_P23231912 | chr4:116668443-116668487                          | NM_175244:512      | Hectd3     | INSIDE                 | 0.174                                           | 0.669                            | 2504.04             | 1675.53             | 0.116                            | 1937.40             | 225.04              |
| A_68_P27495202 | chr10:119526727-119526771                         | NM_080446:23273    | Helb       | INSIDE                 | 0.619                                           | 2.400                            | 1052.84             | 2526.84             | 1.486                            | 871.14              | 1294.48             |
| A_68_P27495358 | chr10:119549908-119549958                         | NM_080446:89       | Helb       | INSIDE                 | 0.267                                           | 0.615                            | 969.27              | 596.28              | 0.164                            | 731.87              | 120.14              |
| A_68_P23931498 | chr5:101227159-101227203                          | NM_001081107:439   | Helq       | INSIDE                 | 0.209                                           | 0.449                            | 1418.54             | 637.57              | 0.094                            | 1225.39             | 115.33              |
| A_68_P25835333 | chr8:47377718-47377762                            | NM_173789:2285     | Helt       | INSIDE                 | 0.546                                           | 0.709                            | 1376.17             | 975.11              | 0.387                            | 1184.63             | 458.14              |
| A_68_P25835354 | chr8:47380103-47380147                            | NM_173789:-99      | Helt       | PROMOTER               | 0.145                                           | 0.659                            | 1657.80             | 1092.20             | 0.095                            | 1306.90             | 124.55              |
| A_68_P28107584 | chr11:107408339-107408383                         | NM_198298:-913     | Helz       | PROMOTER               | 0.448                                           | 0.609                            | 1674.35             | 1019.42             | 0.273                            | 1294.31             | 353.21              |
| A_68_P26807872 | chr9:107240552-107240596                          | NM_133984:107      | Hemk1      | INSIDE                 | 0.242                                           | 0.372                            | 1849.45             | 687.29              | 0.090                            | 1339.56             | 120.37              |
| A_68_P24483216 | chr6:58781482-58781526                            | NM_028705:-2189    | Herc3      | PROMOTER               | 0.581                                           | 0.701                            | 1869.26             | 1311.24             | 0.408                            | 1596.32             | 650.82              |
| A_68_P23416912 | chr4:151533736-151533780                          | NM_008236:783      | Hes2       | INSIDE                 | 0.328                                           | 0.644                            | 2289.50             | 1473.88             | 0.211                            | 1490.45             | 314.73              |
| A_68_P23416916 | chr4:151534184-151534228                          | NM_008236:1231     | Hes2       | INSIDE                 | 0.177                                           | 0.454                            | 2238.35             | 1016.34             | 0.080                            | 1494.86             | 120.07              |
| A_68_P23416918 | chr4:151534429-151534473                          | NM_008236:1475     | Hes2       | INSIDE                 | 0.418                                           | 0.526                            | 1120.01             | 589.36              | 0.220                            | 990.52              | 218.07              |
| A_68_P23417743 | chr4:151660802-151660846                          | NM_008237:4947     | Hes3       | INSIDE                 | 0.234                                           | 0.655                            | 1545.32             | 1011.76             | 0.153                            | 1151.32             | 176.17              |
| A_68_P23417747 | chr4:151661148-151661192                          | NM_008237:4601     | Hes3       | INSIDE                 | 0.608                                           | 0.535                            | 2896.06             | 1550.47             | 0.325                            | 2289.36             | 745.00              |
| A_68_P23417749 | chr4:151661314-151661358                          | NM_008237:4435     | Hes3       | INSIDE                 | 0.221                                           | 0.659                            | 1411.08             | 929.33              | 0.145                            | 1140.56             | 165.80              |
| A_68_P23417771 | chr4:151664685-151664729                          | NM_008237:1065     | Hes3       | INSIDE                 | 0.195                                           | 0.556                            | 1313.42             | 729.88              | 0.108                            | 1141.18             | 123.41              |
| A_68_P20442334 | chr1:93310020-93310067                            | NM_019479:-244     | Hes6       | PROMOTER               | 0.428                                           | 0.626                            | 971.17              | 607.78              | 0.268                            | 735.86              | 196.96              |
| A_68_P28083427 | chr11:102977675-102977719                         | NM_138753:58       | Hexim1     | INSIDE                 | 0.175                                           | 0.511                            | 1849.53             | 945.58              | 0.090                            | 1352.84             | 121.25              |
| A_68_P28083435 | chr11:102978558-102978602                         | NM_138753:942      | Hexim1     | INSIDE                 | 0.381                                           | 0.654                            | 1619.45             | 1059.54             | 0.249                            | 1327.14             | 331.08              |
| A_68_P28083436 | chr11:102978646-102978690                         | NM_138753:1030     | Hexim1     | INSIDE                 | 0.171                                           | 0.598                            | 1671.62             | 1000.41             | 0.102                            | 1348.68             | 137.80              |
| A_68_P28083441 | chr11:102979217-102979261                         | NM_138753:1600     | Hexim1     | INSIDE                 | 0.431                                           | 0.680                            | 1269.78             | 863.31              | 0.293                            | 1059.33             | 310.43              |
| A_68_P28083512 | chr11:102993647-102993691                         | NM_001130516:-984  | Hexim2     | PROMOTER               | 0.623                                           | 0.519                            | 1413.27             | 733.25              | 0.323                            | 1164.68             | 376.68              |
| A_68_P28083514 | chr11:102993838-102993882                         | NM_001130516:-792  | Hexim2     | PROMOTER               | 0.256                                           | 1.534                            | 1317.26             | 2021.04             | 0.394                            | 917.91              | 361.20              |
| A_68_P28083515 | chr11:102993907-102993951                         | NM_001130516:-724  | Hexim2     | PROMOTER               | 0.078                                           | 1.695                            | 2730.81             | 4628.89             | 0.132                            | 1621.76             | 214.70              |
| A_68_P21933403 | chr3:8664956-8665000                              | NM_010423:2060     | Hey1       | INSIDE                 | 0.098                                           | 0.613                            | 2701.20             | 1656.23             | 0.060                            | 1964.09             | 118.45              |
| A_68_P21933404 | chr3:8665074-8665126                              | NM_010423:1938     | Hey1       | INSIDE                 | 0.199                                           | 0.690                            | 1111.30             | 766.70              | 0.138                            | 884.71              | 121.66              |
| A_68_P23964040 | chr5:107354969-107355013                          | NM_177873:-81      | Hfm1       | PROMOTER               | 0.498                                           | 0.639                            | 2141.64             | 1367.76             | 0.318                            | 1834.41             | 583.29              |
| A_68_P20945388 | chr1:194597149-194597193                          | NM_144881:243      | Hhat       | INSIDE                 | 0.219                                           | 0.555                            | 1192.89             | 661.67              | 0.122                            | 1010.54             | 122.83              |
| A_68_P32095557 | chr19:37509810-37509854                           | NM_008245:502      | Hhex       | INSIDE                 | 0.498                                           | 0.365                            | 2104.86             | 768.63              | 0.182                            | 1796.54             | 326.42              |
| A_68_P32095558 | chr19:37509889-37509933                           | NM_008245:580      | Hhex       | INSIDE                 | 0.471                                           | 0.509                            | 1751.67             | 892.45              | 0.240                            | 1582.63             | 379.54              |
| A_68_P25997733 | chr8:82581462-82581506                            | NM_020259:423      | Hhip       | INSIDE                 | 0.333                                           | 0.541                            | 1886.99             | 1021.05             | 0.180                            | 1655.06             | 298.20              |
| A_68_P28727214 | chr12:109544952-109544996                         | NM_001044380:495   | Hhip1      | INSIDE                 | 0.550                                           | 0.429                            | 1893.69             | 812.73              | 0.236                            | 1451.64             | 342.78              |
| A_68_P28727298 | chr12:109557168-109557212                         | NM_001044380:12711 | Hhip1      | INSIDE                 | 0.664                                           | 4.705                            | 1516.50             | 7134.36             | 3.125                            | 1142.63             | 3570.46             |
| A_68_P27924564 | chr11:74979683-74979728                           | NM_001098203:1949  | Hic1       | INSIDE                 | 0.410                                           | 0.384                            | 1585.65             | 608.64              | 0.157                            | 1227.08             | 193.10              |
| A_68_P27924565 | chr11:74979765-74979809                           | NM_001098203:1868  | Hic1       | INSIDE                 | 0.448                                           | 0.469                            | 1230.09             | 577.15              | 0.210                            | 904.45              | 189.90              |
| A_68_P27924588 | chr11:74982421-74982465                           | NM_001098203:-788  | Hic1       | PROMOTER               | 0.294                                           | 0.429                            | 2116.45             | 908.35              | 0.126                            | 1711.04             | 216.24              |
| A_68_P27924562 | chr11:74979450-74979494                           | NM_001098203:2182  | Hic1       | INSIDE                 | 0.670                                           | 0.487                            | 1104.94             | 537.62              | 0.326                            | 842.19              | 274.44              |
| A_68_P30572652 | chr16:17233443-17233487                           | NM_178922:-215     | Hic2       | PROMOTER               | 0.098                                           | 0.571                            | 2791.23             | 1595.13             | 0.056                            | 2187.85             | 122.38              |
| A_68_P28540453 | chr12:75008595-75008639                           | NM_010431:-237     | Hif1a      | PROMOTER               | 0.455                                           | 0.537                            | 1693.26             | 909.27              | 0.244                            | 1303.66             | 318.38              |

| ProbeName      | Target position of probe on CpG island microarray | TargetID           | GeneSymbol | CpG island Description | Ratio of relative methylation (TiO2-NP/Vehicle) | Sham group                       |                     |                     | TiO <sub>2</sub> -H group        |                     |                     |
|----------------|---------------------------------------------------|--------------------|------------|------------------------|-------------------------------------------------|----------------------------------|---------------------|---------------------|----------------------------------|---------------------|---------------------|
|                |                                                   |                    |            |                        |                                                 | Relative methylation (Cy-5/Cy-3) | Cy-3 signal (Input) | Cy-5 signal (MeDIP) | Relative methylation (Cy-5/Cy-3) | Cy-3 signal (Input) | Cy-5 signal (MeDIP) |
| A_68_P26466888 | chr9:44113383-44113427                            | NM_172162:350      | Hinfp      | INSIDE                 | 0.573                                           | 0.728                            | 1790.13             | 1302.75             | 0.417                            | 1557.83             | 649.66              |
| A_68_P26466893 | chr9:44113911-44113955                            | NM_172162:-178     | Hinfp      | PROMOTER               | 0.665                                           | 0.436                            | 1731.62             | 755.54              | 0.290                            | 1237.93             | 359.38              |
| A_68_P24116584 | chr5:135965213-135965257                          | NM_146001:55758    | Hip1       | INSIDE                 | 0.586                                           | 0.687                            | 1038.07             | 713.20              | 0.403                            | 893.22              | 359.88              |
| A_68_P24116811 | chr5:136020789-136020833                          | NM_146001:182      | Hip1       | INSIDE                 | 0.336                                           | 0.648                            | 1656.74             | 1073.41             | 0.218                            | 1180.12             | 256.84              |
| A_68_P24116812 | chr5:136020886-136020930                          | NM_146001:84       | Hip1       | INSIDE                 | 0.193                                           | 0.516                            | 1705.07             | 879.76              | 0.100                            | 1283.89             | 127.92              |
| A_68_P24116813 | chr5:136021029-136021073                          | NM_146001:-58      | Hip1       | PROMOTER               | 0.204                                           | 0.560                            | 1404.69             | 786.06              | 0.114                            | 1097.20             | 125.40              |
| A_68_P22388053 | chr3:103594655-103594699                          | NM_010432:522      | Hipk1      | INSIDE                 | 0.489                                           | 0.652                            | 2358.97             | 1538.21             | 0.319                            | 1716.38             | 546.89              |
| A_68_P22388054 | chr3:103594799-103594843                          | NM_010432:378      | Hipk1      | INSIDE                 | 0.488                                           | 0.404                            | 2251.66             | 909.39              | 0.197                            | 1777.28             | 350.43              |
| A_68_P22388055 | chr3:103594904-103594948                          | NM_010432:272      | Hipk1      | INSIDE                 | 0.606                                           | 0.677                            | 1287.47             | 872.07              | 0.411                            | 995.39              | 408.69              |
| A_68_P24380022 | chr6:38825884-38825928                            | NM_010433:283      | Hipk2      | INSIDE                 | 0.251                                           | 0.613                            | 909.00              | 556.86              | 0.154                            | 797.67              | 122.74              |
| A_68_P21489522 | chr2:104333335-104333384                          | NM_001145824:1287  | Hipk3      | INSIDE                 | 0.247                                           | 0.551                            | 1078.04             | 593.61              | 0.136                            | 855.10              | 116.07              |
| A_68_P21489523 | chr2:104333403-104333447                          | NM_001145824:1222  | Hipk3      | INSIDE                 | 0.296                                           | 0.446                            | 1339.26             | 596.69              | 0.132                            | 1022.60             | 134.85              |
| A_68_P25502648 | chr7:134005213-134005270                          | NM_172746:-244     | Hirip3     | DIVERGENT_PROMOTER     | 0.181                                           | 0.659                            | 1454.84             | 959.35              | 0.120                            | 1046.73             | 125.14              |
| A_68_P25502653 | chr7:134005799-134005843                          | NM_172746:335      | Hirip3     | INSIDE                 | 0.325                                           | 0.426                            | 1549.80             | 659.52              | 0.138                            | 1328.85             | 183.58              |
| A_68_P28883386 | chr13:23855470-23855521                           | NM_030609:-41      | Hist1h1a   | DIVERGENT_PROMOTER     | 0.155                                           | 0.727                            | 4442.08             | 3230.36             | 0.113                            | 3046.22             | 342.78              |
| A_68_P28883199 | chr13:23831258-23831302                           | NM_015786:605      | Hist1h1c   | INSIDE                 | 0.194                                           | 0.450                            | 1895.51             | 852.57              | 0.087                            | 1428.11             | 124.46              |
| A_68_P28882218 | chr13:23654270-23654316                           | NM_178205:-58      | Hist1h3e   | PROMOTER               | 0.142                                           | 0.579                            | 3050.22             | 1765.67             | 0.082                            | 2142.61             | 175.81              |
| A_68_P28882027 | chr13:23627101-23627153                           | NM_145073:-160     | Hist1h3g   | PROMOTER               | 0.153                                           | 0.617                            | 1652.11             | 1018.62             | 0.094                            | 1282.28             | 120.61              |
| A_68_P28883366 | chr13:23853149-23853193                           | NM_178192:-144     | Hist1h4a   | PROMOTER               | 0.274                                           | 0.509                            | 1158.81             | 589.30              | 0.140                            | 857.37              | 119.61              |
| A_68_P28882355 | chr13:23673495-23673539                           | NM_175654:46       | Hist1h4d   | INSIDE                 | 0.444                                           | 0.577                            | 1228.26             | 708.59              | 0.256                            | 898.56              | 230.00              |
| A_68_P22348542 | chr3:96073837-96073891                            | NM_175666:242      | Hist2h2bb  | INSIDE                 | 0.239                                           | 0.591                            | 1160.04             | 685.08              | 0.141                            | 867.97              | 122.58              |
| A_68_P22348231 | chr3:96025351-96025395                            | NM_178214:329      | Hist2h2be  | INSIDE                 | 0.491                                           | 0.348                            | 2059.56             | 717.03              | 0.171                            | 1615.94             | 276.38              |
| A_68_P22348232 | chr3:96025442-96025486                            | NM_178214:421      | Hist2h2be  | INSIDE                 | 0.525                                           | 0.634                            | 1337.54             | 848.64              | 0.333                            | 1018.16             | 339.35              |
| A_68_P27833729 | chr11:58768398-58768446                           | NM_178218:236      | Hist3h2a   | INSIDE                 | 0.389                                           | 0.527                            | 1602.94             | 844.67              | 0.205                            | 1168.73             | 239.53              |
| A_68_P26954160 | chr10:13686535-13686580                           | NM_010437:373      | Hivep2     | INSIDE                 | 0.250                                           | 0.364                            | 1693.23             | 616.19              | 0.091                            | 1290.86             | 117.38              |
| A_68_P26954163 | chr10:13686795-13686839                           | NM_010437:632      | Hivep2     | INSIDE                 | 0.364                                           | 0.539                            | 1026.28             | 553.65              | 0.197                            | 946.65              | 186.06              |
| A_68_P23247367 | chr4:119487484-119487528                          | NM_010657:224      | Hivep3     | INSIDE                 | 0.497                                           | 0.581                            | 1776.78             | 1032.20             | 0.289                            | 1394.74             | 403.02              |
| A_68_P27185478 | chr10:61802859-61802903                           | NM_001146100:289   | Hk1        | INSIDE                 | 0.316                                           | 0.517                            | 1844.88             | 953.18              | 0.163                            | 1390.06             | 227.01              |
| A_68_P27185482 | chr10:61803237-61803281                           | NM_001146100:-89   | Hk1        | DIVERGENT_PROMOTER     | 0.571                                           | 0.702                            | 1982.39             | 1390.70             | 0.400                            | 1654.77             | 662.31              |
| A_68_P24589794 | chr6:82723294-82723338                            | NM_013820:1132     | Hk2        | INSIDE                 | 0.329                                           | 0.638                            | 1871.92             | 1194.40             | 0.210                            | 1528.37             | 321.29              |
| A_68_P24589797 | chr6:82723544-82723588                            | NM_013820:882      | Hk2        | INSIDE                 | 0.634                                           | 0.700                            | 1367.97             | 957.22              | 0.443                            | 1086.57             | 481.83              |
| A_68_P24589798 | chr6:82723620-82723664                            | NM_013820:806      | Hk2        | INSIDE                 | 0.259                                           | 0.608                            | 1041.30             | 633.02              | 0.157                            | 861.69              | 135.63              |
| A_68_P24589801 | chr6:82723921-82723966                            | NM_013820:505      | Hk2        | INSIDE                 | 0.167                                           | 0.689                            | 1467.27             | 1011.14             | 0.115                            | 1037.19             | 119.63              |
| A_68_P24589809 | chr6:82724860-82724912                            | NM_013820:-438     | Hk2        | PROMOTER               | 0.147                                           | 0.594                            | 1934.19             | 1149.04             | 0.087                            | 1311.08             | 114.30              |
| A_68_P20897165 | chr1:186556818-186556862                          | NM_008250:-468     | Hlx        | PROMOTER               | 0.510                                           | 0.627                            | 1028.58             | 644.62              | 0.320                            | 926.83              | 296.27              |
| A_68_P27289056 | chr10:80813448-80813492                           | NM_001163166:-268  | Hmg20b     | DIVERGENT_PROMOTER     | 0.138                                           | 0.557                            | 2214.07             | 1232.20             | 0.077                            | 1578.63             | 120.94              |
| A_68_P31117100 | chr17:27692460-27692504                           | NM_001025427:-1036 | Hmga1      | PROMOTER               | 0.595                                           | 0.692                            | 1553.21             | 1074.37             | 0.412                            | 1403.69             | 577.94              |
| A_68_P27497203 | chr10:119851890-119851938                         | NM_010441:62077    | Hmga2      | INSIDE                 | 0.619                                           | 3.041                            | 1188.53             | 3614.42             | 1.883                            | 922.28              | 1736.95             |
| A_68_P27497666 | chr10:119912069-119912113                         | NM_010441:1901     | Hmga2      | INSIDE                 | 0.238                                           | 0.459                            | 2402.95             | 1102.85             | 0.109                            | 1805.91             | 197.24              |
| A_68_P27497669 | chr10:119912366-119912410                         | NM_010441:1603     | Hmga2      | INSIDE                 | 0.391                                           | 0.640                            | 1046.27             | 669.85              | 0.251                            | 783.71              | 196.34              |
| A_68_P32454250 | chrX:68809345-68809389                            | NM_008253:199      | Hmgb3      | INSIDE                 | 0.213                                           | 1.632                            | 1137.69             | 1856.64             | 0.348                            | 554.51              | 193.12              |
| A_68_P23331344 | chr4:135502377-135502421                          | NM_008254:31       | Hmgcl      | INSIDE                 | 0.204                                           | 0.594                            | 1240.26             | 736.22              | 0.121                            | 952.96              | 115.63              |
| A_68_P29247521 | chr13:97440411-97440457                           | NM_008255:457      | Hmgcr      | INSIDE                 | 0.219                                           | 0.510                            | 1283.20             | 654.55              | 0.112                            | 1052.96             | 117.56              |
| A_68_P30991210 | chr16:96349056-96349100                           | NM_008251:254      | Hmgn1      | INSIDE                 | 0.151                                           | 0.564                            | 2242.06             | 1264.82             | 0.085                            | 1657.50             | 141.29              |

| ProbeName      | Target position of probe on CpG island microarray | TargetID           | GeneSymbol | CpG island Description | Ratio of relative methylation (TiO2-NP/Vehicle) | Sham group                       |                     |                     | TiO <sub>2</sub> -H group        |                     |                     |
|----------------|---------------------------------------------------|--------------------|------------|------------------------|-------------------------------------------------|----------------------------------|---------------------|---------------------|----------------------------------|---------------------|---------------------|
|                |                                                   |                    |            |                        |                                                 | Relative methylation (Cy-5/Cy-3) | Cy-3 signal (Input) | Cy-5 signal (MeDIP) | Relative methylation (Cy-5/Cy-3) | Cy-3 signal (Input) | Cy-5 signal (MeDIP) |
| A_68_P23320286 | chr4:133523495-133523539                          | NM_016957:390      | Hmgn2      | INSIDE                 | 0.300                                           | 0.453                            | 3163.61             | 1431.56             | 0.136                            | 2470.57             | 334.83              |
| A_68_P26682080 | chr9:83039935-83039979                            | NM_026122:258      | Hmgn3      | INSIDE                 | 0.654                                           | 0.656                            | 1783.67             | 1170.60             | 0.429                            | 1385.19             | 594.39              |
| A_68_P26682081 | chr9:83040074-83040118                            | NM_026122:118      | Hmgn3      | INSIDE                 | 0.497                                           | 0.640                            | 1373.14             | 879.38              | 0.318                            | 1083.76             | 344.67              |
| A_68_P25971956 | chr8:77617525-77617569                            | NM_010442:30       | Hmox1      | INSIDE                 | 0.354                                           | 0.623                            | 977.54              | 608.67              | 0.220                            | 790.71              | 174.17              |
| A_68_P30511777 | chr16:4726653-4726697                             | NM_001136066:314   | Hmox2      | INSIDE                 | 0.524                                           | 0.514                            | 2757.78             | 1417.92             | 0.269                            | 2341.07             | 630.63              |
| A_68_P23600187 | chr5:35731282-35731326                            | NM_010445:-461     | Hmx1       | PROMOTER               | 0.524                                           | 0.522                            | 1697.52             | 886.83              | 0.274                            | 1428.06             | 390.66              |
| A_68_P23600193 | chr5:35732106-35732150                            | NM_010445:363      | Hmx1       | INSIDE                 | 0.281                                           | 0.444                            | 3075.14             | 1366.56             | 0.125                            | 2298.91             | 286.79              |
| A_68_P25528903 | chr7:138686351-138686395                          | NM_008257:-104     | Hmx3       | PROMOTER               | 0.426                                           | 0.430                            | 1802.03             | 775.35              | 0.183                            | 1528.16             | 280.03              |
| A_68_P25528905 | chr7:138686558-138686602                          | NM_008257:104      | Hmx3       | INSIDE                 | 0.216                                           | 0.356                            | 2359.46             | 839.52              | 0.077                            | 1880.21             | 144.42              |
| A_68_P25528910 | chr7:138687411-138687455                          | NM_008257:956      | Hmx3       | INSIDE                 | 0.579                                           | 0.611                            | 2432.25             | 1486.29             | 0.354                            | 1796.73             | 635.58              |
| A_68_P28153961 | chr11:115375325-115375369                         | NM_008258:338      | Hn1        | INSIDE                 | 0.240                                           | 0.667                            | 868.25              | 579.30              | 0.160                            | 744.49              | 119.08              |
| A_68_P28153966 | chr11:115375918-115375967                         | NM_008258:-258     | Hn1        | PROMOTER               | 0.284                                           | 0.639                            | 827.18              | 528.47              | 0.181                            | 663.28              | 120.28              |
| A_68_P31100623 | chr17:25097367-25097411                           | NM_198937:180      | Hn11       | INSIDE                 | 0.523                                           | 0.461                            | 1873.12             | 863.53              | 0.241                            | 1688.36             | 406.87              |
| A_68_P31100627 | chr17:25097854-25097898                           | NM_198937:-308     | Hn11       | PROMOTER               | 0.573                                           | 0.514                            | 1415.31             | 728.17              | 0.295                            | 1145.61             | 337.48              |
| A_68_P27973894 | chr11:83664886-83664930                           | NM_009330:538      | Hnflb      | INSIDE                 | 0.517                                           | 0.656                            | 2460.11             | 1613.38             | 0.339                            | 1948.79             | 660.51              |
| A_68_P29071677 | chr13:58230562-58230606                           | NM_029872:-667     | Hnrmpa0    | PROMOTER               | 0.302                                           | 0.622                            | 3034.47             | 1887.17             | 0.188                            | 2518.81             | 472.73              |
| A_68_P29071679 | chr13:58230820-58230864                           | NM_029872:-925     | Hnrmpa0    | PROMOTER               | 0.570                                           | 0.490                            | 1513.66             | 741.79              | 0.279                            | 1149.29             | 321.01              |
| A_68_P24444427 | chr6:51419364-51419408                            | NM_016806:507      | Hnrmpa2b1  | INSIDE                 | 0.260                                           | 0.495                            | 7818.60             | 3872.52             | 0.129                            | 5293.75             | 682.31              |
| A_68_P21345222 | chr2:75497220-75497264                            | NM_053263:-73      | Hnrmpa3    | PROMOTER               | 0.619                                           | 0.489                            | 1143.12             | 558.50              | 0.302                            | 996.67              | 301.31              |
| A_68_P29604764 | chr14:52723955-52723999                           | NM_001170981:-273  | Hnrnpc     | DIVERGENT_PROMOTER     | 0.187                                           | 0.538                            | 1609.29             | 865.54              | 0.100                            | 1215.71             | 122.11              |
| A_68_P23927128 | chr5:100406693-100406737                          | NM_001077265:1243  | Hnrmpd     | INSIDE                 | 0.342                                           | 0.657                            | 1887.39             | 1240.47             | 0.225                            | 1455.95             | 326.96              |
| A_68_P23927130 | chr5:100406931-100406976                          | NM_001077265:1004  | Hnrmpd     | INSIDE                 | 0.492                                           | 0.521                            | 1374.29             | 715.84              | 0.256                            | 1040.83             | 266.89              |
| A_68_P23927139 | chr5:100407949-100407993                          | NM_001077265:-13   | Hnrmpd     | PROMOTER               | 0.429                                           | 0.391                            | 2458.35             | 960.66              | 0.168                            | 1988.35             | 333.70              |
| A_68_P24783934 | chr6:117857089-117857136                          | NM_001166428:-709  | Hnrmpf     | PROMOTER               | 0.210                                           | 0.593                            | 1355.27             | 803.51              | 0.124                            | 947.50              | 117.90              |
| A_68_P24783942 | chr6:117857933-117857977                          | NM_001166427:-9357 | Hnrmpf     | PROMOTER               | 0.243                                           | 0.508                            | 1155.66             | 587.04              | 0.124                            | 943.02              | 116.55              |
| A_68_P24783944 | chr6:117858262-117858321                          | NM_001166427:-9020 | Hnrmpf     | PROMOTER               | 0.196                                           | 0.619                            | 1224.66             | 758.66              | 0.122                            | 970.06              | 117.89              |
| A_68_P24784005 | chr6:117866930-117866974                          | NM_001166427:-359  | Hnrmpf     | PROMOTER               | 0.367                                           | 0.586                            | 1905.99             | 1117.24             | 0.215                            | 1450.07             | 312.04              |
| A_68_P27788210 | chr11:50191797-50191841                           | NM_021510:598      | Hnrmp1     | INSIDE                 | 0.447                                           | 0.742                            | 2420.16             | 1794.73             | 0.332                            | 1721.94             | 571.11              |
| A_68_P32672782 | chrX:131135885-131135929                          | NM_019868:82       | Hnrmp2     | INSIDE                 | 0.075                                           | 2.992                            | 5115.46             | 15306.29            | 0.225                            | 2082.20             | 468.59              |
| A_68_P27189024 | chr10:62485962-62486006                           | NM_001079824:613   | Hnrmp3     | INSIDE                 | 0.541                                           | 0.692                            | 2870.62             | 1986.57             | 0.375                            | 2192.99             | 821.34              |
| A_68_P29073062 | chr13:58503740-58503784                           | NM_025279:115      | Hnrmpk     | INSIDE                 | 0.626                                           | 0.613                            | 898.64              | 550.43              | 0.384                            | 755.18              | 289.67              |
| A_68_P31150129 | chr17:33822024-33822068                           | NM_001109913:357   | Hnrmpm     | INSIDE                 | 0.162                                           | 0.528                            | 1867.53             | 986.84              | 0.086                            | 1526.06             | 130.80              |
| A_68_P31150130 | chr17:33822156-33822206                           | NM_001109913:223   | Hnrmpm     | INSIDE                 | 0.111                                           | 0.476                            | 3140.60             | 1495.74             | 0.053                            | 2380.94             | 125.45              |
| A_68_P23333247 | chr4:135867486-135867530                          | NM_028871:618      | Hnrmpr     | INSIDE                 | 0.171                                           | 0.698                            | 3342.59             | 2331.65             | 0.119                            | 2477.62             | 295.06              |
| A_68_P25011771 | chr7:26540127-26540178                            | NM_144922:-413     | Hnrmpull   | PROMOTER               | 0.246                                           | 0.490                            | 1203.20             | 590.03              | 0.121                            | 1059.53             | 127.76              |
| A_68_P31381041 | chr17:80460590-80460634                           | NM_144802:1062     | Hnrpll     | INSIDE                 | 0.367                                           | 0.428                            | 2048.07             | 876.46              | 0.157                            | 1597.30             | 250.70              |
| A_68_P31381050 | chr17:80461904-80461948                           | NM_144802:-252     | Hnrpll     | PROMOTER               | 0.583                                           | 0.604                            | 1043.17             | 630.03              | 0.352                            | 867.92              | 305.53              |
| A_68_P25950855 | chr8:72807002-72807046                            | NM_001146153:127   | Homer3     | INSIDE                 | 0.436                                           | 0.610                            | 3020.53             | 1843.68             | 0.266                            | 2430.86             | 647.54              |
| A_68_P29614704 | chr14:55483280-55483329                           | NM_001177705:-309  | Homez      | PROMOTER               | 0.250                                           | 0.504                            | 1164.74             | 586.74              | 0.126                            | 937.73              | 118.15              |
| A_68_P26023020 | chr8:87509915-87509959                            | NM_001167991:-4557 | Hook2      | DIVERGENT_PROMOTER     | 0.288                                           | 0.510                            | 1072.57             | 546.88              | 0.147                            | 953.13              | 140.17              |
| A_68_P26023052 | chr8:87514587-87514631                            | NM_001167991:115   | Hook2      | INSIDE                 | 0.424                                           | 0.642                            | 1430.89             | 917.99              | 0.272                            | 1070.13             | 290.93              |
| A_68_P25730814 | chr8:27229164-27229208                            | NM_207659:510      | Hook3      | INSIDE                 | 0.561                                           | 0.465                            | 1832.79             | 852.16              | 0.261                            | 1488.23             | 388.33              |
| A_68_P23819789 | chr5:77524030-77524074                            | NM_001159900:240   | Hopx       | INSIDE                 | 0.338                                           | 0.698                            | 1624.76             | 1134.48             | 0.236                            | 1430.51             | 337.68              |
| A_68_P24449304 | chr6:52184811-52184855                            | NM_008263:106      | Hoxa10     | INSIDE                 | 0.247                                           | 0.543                            | 1273.12             | 691.07              | 0.134                            | 892.55              | 119.90              |

| ProbeName      | Target position of probe on CpG island microarray | TargetID         | GeneSymbol | CpG island Description | Ratio of relative methylation (TiO2-NP/Vehicle) | Sham group                       |                     |                     | TiO <sub>2</sub> -H group        |                     |                     |
|----------------|---------------------------------------------------|------------------|------------|------------------------|-------------------------------------------------|----------------------------------|---------------------|---------------------|----------------------------------|---------------------|---------------------|
|                |                                                   |                  |            |                        |                                                 | Relative methylation (Cy-5/Cy-3) | Cy-3 signal (Input) | Cy-5 signal (MeDIP) | Relative methylation (Cy-5/Cy-3) | Cy-3 signal (Input) | Cy-5 signal (MeDIP) |
| A_68_P24449350 | chr6:52190240-52190299                            | NM_008263:-5331  | Hoxa10     | PROMOTER               | 0.236                                           | 0.485                            | 1311.09             | 636.18              | 0.114                            | 1053.10             | 120.41              |
| A_68_P24449398 | chr6:52195787-52195837                            | NM_010450:-46    | Hoxa11     | PROMOTER               | 0.205                                           | 0.417                            | 1997.63             | 832.36              | 0.086                            | 1403.88             | 120.15              |
| A_68_P24449402 | chr6:52196249-52196297                            | NM_010450:-506   | Hoxa11     | PROMOTER               | 0.114                                           | 0.715                            | 2020.02             | 1443.81             | 0.081                            | 1473.78             | 119.83              |
| A_68_P24449404 | chr6:52196424-52196469                            | NM_010450:-680   | Hoxa11     | PROMOTER               | 0.362                                           | 0.568                            | 1406.16             | 799.17              | 0.206                            | 962.44              | 197.83              |
| A_68_P24449395 | chr6:52195431-52195475                            | NR_015348:211    | Hoxa11as   | INSIDE                 | 0.472                                           | 0.477                            | 1110.75             | 529.39              | 0.225                            | 889.37              | 200.15              |
| A_68_P24449462 | chr6:52203025-52203069                            | NR_015348:7805   | Hoxa11as   | DOWNSTREAM             | 0.184                                           | 0.480                            | 2973.37             | 1425.96             | 0.088                            | 2472.11             | 218.04              |
| A_68_P24448784 | chr6:52122568-52122612                            | NM_010452:40476  | Hoxa3      | INSIDE                 | 0.236                                           | 0.633                            | 1727.18             | 1093.31             | 0.149                            | 1299.10             | 193.89              |
| A_68_P24448822 | chr6:52127106-52127159                            | NM_010452:35934  | Hoxa3      | INSIDE                 | 0.158                                           | 0.636                            | 1596.56             | 1015.95             | 0.100                            | 1238.86             | 124.26              |
| A_68_P24448934 | chr6:52142084-52142128                            | NM_008265:-404   | Hoxa4      | DIVERGENT_PROMOTER     | 0.588                                           | 0.393                            | 1418.62             | 557.15              | 0.231                            | 1199.19             | 277.16              |
| A_68_P24449036 | chr6:52153762-52153806                            | NM_010453:802    | Hoxa5      | INSIDE                 | 0.329                                           | 0.520                            | 1406.56             | 730.98              | 0.171                            | 1068.76             | 182.49              |
| A_68_P24449040 | chr6:52154168-52154212                            | NM_010453:396    | Hoxa5      | INSIDE                 | 0.620                                           | 0.622                            | 3048.81             | 1897.39             | 0.386                            | 2375.59             | 915.95              |
| A_68_P24449041 | chr6:52154245-52154298                            | NM_010453:315    | Hoxa5      | INSIDE                 | 0.270                                           | 0.479                            | 1220.24             | 584.92              | 0.129                            | 921.20              | 119.11              |
| A_68_P24449064 | chr6:52156622-52156666                            | NM_010454:1979   | Hoxa6      | INSIDE                 | 0.435                                           | 0.491                            | 1095.46             | 538.22              | 0.214                            | 920.02              | 196.71              |
| A_68_P24449227 | chr6:52175677-52175721                            | NM_010456:1671   | Hoxa9      | INSIDE                 | 0.286                                           | 0.577                            | 1083.34             | 625.13              | 0.165                            | 906.20              | 149.66              |
| A_68_P24449231 | chr6:52176139-52176188                            | NM_010456:1206   | Hoxa9      | INSIDE                 | 0.262                                           | 0.458                            | 1245.49             | 570.57              | 0.120                            | 974.02              | 116.97              |
| A_68_P28044102 | chr11:96227285-96227329                           | NM_008266:235    | Hoxb1      | INSIDE                 | 0.150                                           | 0.716                            | 3630.03             | 2599.93             | 0.108                            | 2369.35             | 255.08              |
| A_68_P28044105 | chr11:96227597-96227641                           | NM_008266:547    | Hoxb1      | INSIDE                 | 0.195                                           | 0.495                            | 1785.36             | 884.48              | 0.097                            | 1300.11             | 125.76              |
| A_68_P28042988 | chr11:96064572-96064616                           | NM_008267:8920   | Hoxb13     | DOWNSTREAM             | 0.148                                           | 0.673                            | 2519.76             | 1696.56             | 0.100                            | 1915.09             | 190.66              |
| A_68_P28042990 | chr11:96064768-96064813                           | NM_008267:9116   | Hoxb13     | DOWNSTREAM             | 0.234                                           | 0.726                            | 4266.44             | 3097.35             | 0.170                            | 3090.64             | 523.99              |
| A_68_P28043946 | chr11:96205491-96205535                           | NM_010458:430    | Hoxb3      | INSIDE                 | 0.110                                           | 0.493                            | 2866.05             | 1411.73             | 0.054                            | 2193.26             | 118.74              |
| A_68_P28043947 | chr11:96205604-96205648                           | NM_010458:544    | Hoxb3      | INSIDE                 | 0.422                                           | 0.531                            | 2464.90             | 1309.04             | 0.224                            | 1879.09             | 420.76              |
| A_68_P28043948 | chr11:96205685-96205729                           | NM_010458:624    | Hoxb3      | INSIDE                 | 0.354                                           | 0.495                            | 1421.11             | 703.43              | 0.175                            | 1108.68             | 194.20              |
| A_68_P28043737 | chr11:96180501-96180545                           | NM_010459:942    | Hoxb4      | INSIDE                 | 0.054                                           | 0.742                            | 4134.06             | 3067.29             | 0.040                            | 2834.86             | 114.11              |
| A_68_P28043606 | chr11:96165053-96165098                           | NM_008268:250    | Hoxb5      | INSIDE                 | 0.135                                           | 0.595                            | 2809.13             | 1671.01             | 0.080                            | 1699.38             | 136.07              |
| A_68_P28043569 | chr11:96160876-96160920                           | NM_008269:414    | Hoxb6      | INSIDE                 | 0.662                                           | 0.559                            | 1057.54             | 590.81              | 0.370                            | 903.37              | 334.06              |
| A_68_P28043444 | chr11:96145749-96145793                           | NM_010461:2552   | Hoxb8      | INSIDE                 | 0.446                                           | 0.539                            | 3451.12             | 1861.77             | 0.241                            | 2677.95             | 644.60              |
| A_68_P30501058 | chr15:102797076-102797125                         | NM_010462:-126   | Hoxc10     | PROMOTER               | 0.388                                           | 0.430                            | 1419.27             | 610.74              | 0.167                            | 969.49              | 161.89              |
| A_68_P30501066 | chr15:102798113-102798164                         | NM_010462:912    | Hoxc10     | INSIDE                 | 0.134                                           | 1.464                            | 822.14              | 1203.90             | 0.196                            | 593.66              | 116.37              |
| A_68_P30500964 | chr15:102785193-102785237                         | NM_001024842:258 | Hoxc11     | INSIDE                 | 0.129                                           | 0.585                            | 2165.22             | 1266.42             | 0.076                            | 1605.07             | 121.34              |
| A_68_P30500796 | chr15:102765447-102765491                         | NM_010463:-1815  | Hoxc12     | PROMOTER               | 0.530                                           | 0.579                            | 1629.59             | 944.23              | 0.307                            | 1508.98             | 463.54              |
| A_68_P30500861 | chr15:102773323-102773367                         | NM_010463:6061   | Hoxc12     | DOWNSTREAM             | 0.653                                           | 0.703                            | 1594.27             | 1121.45             | 0.460                            | 1243.25             | 571.40              |
| A_68_P30500862 | chr15:102773465-102773509                         | NM_010463:6203   | Hoxc12     | DOWNSTREAM             | 0.102                                           | 0.686                            | 2710.75             | 1859.78             | 0.070                            | 1726.95             | 120.68              |
| A_68_P30501631 | chr15:102865426-102865470                         | NM_013553:623    | Hoxc4      | INSIDE                 | 0.463                                           | 0.569                            | 2610.99             | 1486.39             | 0.264                            | 1955.37             | 515.30              |
| A_68_P30501636 | chr15:102866066-102866110                         | NM_013553:1263   | Hoxc4      | INSIDE                 | 0.611                                           | 0.709                            | 2052.98             | 1455.93             | 0.433                            | 1530.93             | 663.51              |
| A_68_P21339408 | chr2:74600811-74600855                            | NM_010467:-204   | Hoxd1      | PROMOTER               | 0.528                                           | 0.558                            | 2033.10             | 1134.00             | 0.295                            | 1600.30             | 471.32              |
| A_68_P21339410 | chr2:74601035-74601079                            | NM_010467:20     | Hoxd1      | INSIDE                 | 0.540                                           | 0.604                            | 1186.35             | 716.54              | 0.326                            | 957.69              | 312.34              |
| A_68_P21339411 | chr2:74601129-74601173                            | NM_010467:114    | Hoxd1      | INSIDE                 | 0.234                                           | 0.471                            | 3599.67             | 1695.18             | 0.110                            | 2829.54             | 311.74              |
| A_68_P21339415 | chr2:74601471-74601515                            | NM_010467:456    | Hoxd1      | INSIDE                 | 0.669                                           | 0.708                            | 2539.99             | 1797.15             | 0.474                            | 2083.43             | 986.57              |
| A_68_P21338806 | chr2:74526046-74526090                            | NM_013554:-3936  | Hoxd10     | PROMOTER               | 0.239                                           | 0.685                            | 2057.06             | 1409.00             | 0.164                            | 1567.47             | 257.10              |
| A_68_P21338737 | chr2:74517808-74517856                            | NM_008273:-2617  | Hoxd11     | PROMOTER               | 0.379                                           | 0.653                            | 1564.43             | 1021.20             | 0.247                            | 1084.94             | 268.44              |
| A_68_P21338756 | chr2:74520344-74520390                            | NM_008273:-83    | Hoxd11     | PROMOTER               | 0.242                                           | 0.554                            | 1053.33             | 583.16              | 0.134                            | 864.65              | 115.70              |
| A_68_P21338645 | chr2:74506594-74506638                            | NM_008275:250    | Hoxd13     | INSIDE                 | 0.628                                           | 0.617                            | 3313.08             | 2045.71             | 0.388                            | 2518.88             | 976.32              |
| A_68_P21339173 | chr2:74570711-74570762                            | NM_010468:20687  | Hoxd3      | INSIDE                 | 0.216                                           | 0.642                            | 1038.19             | 666.11              | 0.139                            | 849.83              | 117.73              |
| A_68_P21339175 | chr2:74570928-74570982                            | NM_010468:20905  | Hoxd3      | INSIDE                 | 0.175                                           | 0.672                            | 1839.81             | 1237.11             | 0.118                            | 1054.44             | 124.16              |

| ProbeName      | Target position of probe on CpG island microarray | TargetID            | GeneSymbol | CpG island Description | Ratio of relative methylation (TiO2-NP/Vehicle) | Sham group                       |                     |                     | TiO <sub>2</sub> -H group        |                     |                     |
|----------------|---------------------------------------------------|---------------------|------------|------------------------|-------------------------------------------------|----------------------------------|---------------------|---------------------|----------------------------------|---------------------|---------------------|
|                |                                                   |                     |            |                        |                                                 | Relative methylation (Cy-5/Cy-3) | Cy-3 signal (Input) | Cy-5 signal (MeDIP) | Relative methylation (Cy-5/Cy-3) | Cy-3 signal (Input) | Cy-5 signal (MeDIP) |
| A_68_P21339241 | chr2:74578701-74578745                            | NM_010468:28673     | Hoxd3      | INSIDE                 | 0.437                                           | 0.593                            | 1239.05             | 734.25              | 0.259                            | 898.72              | 232.99              |
| A_68_P21339293 | chr2:74585053-74585097                            | NM_010468:35025     | Hoxd3      | INSIDE                 | 0.245                                           | 0.569                            | 4052.26             | 2305.23             | 0.139                            | 2746.45             | 382.56              |
| A_68_P21339294 | chr2:74585119-74585163                            | NM_010468:35091     | Hoxd3      | INSIDE                 | 0.344                                           | 0.683                            | 1523.36             | 1039.69             | 0.235                            | 1194.89             | 280.82              |
| A_68_P21339318 | chr2:74587859-74587910                            | NM_010468:37835     | Hoxd3      | DOWNSTREAM             | 0.271                                           | 0.535                            | 990.54              | 530.01              | 0.145                            | 835.08              | 121.03              |
| A_68_P21339320 | chr2:74588185-74588229                            | NM_010468:38157     | Hoxd3      | DOWNSTREAM             | 0.333                                           | 0.619                            | 903.43              | 559.59              | 0.207                            | 627.49              | 129.62              |
| A_68_P21339129 | chr2:74565400-74565445                            | NM_010469:5388      | Hoxd4      | INSIDE                 | 0.460                                           | 0.542                            | 1058.17             | 574.00              | 0.250                            | 952.19              | 237.60              |
| A_68_P21338894 | chr2:74536266-74536310                            | NM_013555:469       | Hoxd9      | INSIDE                 | 0.177                                           | 0.544                            | 1477.23             | 803.63              | 0.096                            | 1236.00             | 119.12              |
| A_68_P28271876 | chr12:17697378-17697423                           | NM_016677:219       | Hpcal1     | PROMOTER               | 0.041                                           | 1.988                            | 2184.05             | 4341.67             | 0.082                            | 1451.54             | 118.99              |
| A_68_P28271880 | chr12:17697825-17697869                           | NM_016677:227       | Hpcal1     | INSIDE                 | 0.470                                           | 0.636                            | 900.56              | 572.63              | 0.299                            | 796.02              | 238.04              |
| A_68_P28271882 | chr12:17698051-17698099                           | NM_016677:455       | Hpcal1     | INSIDE                 | 0.031                                           | 1.447                            | 3887.70             | 5626.17             | 0.045                            | 2651.60             | 120.63              |
| A_68_P23231145 | chr4:116497325-116497369                          | NM_146256:-3233     | Hpd1       | PROMOTER               | 0.242                                           | 0.438                            | 1410.27             | 617.73              | 0.106                            | 1110.21             | 117.57              |
| A_68_P32123366 | chr19:42854178-42854227                           | NM_019424:264       | Hps1       | INSIDE                 | 0.303                                           | 0.504                            | 1169.93             | 590.13              | 0.153                            | 865.39              | 132.45              |
| A_68_P32141593 | chr19:46078116-46078160                           | NM_176785:171       | Hps6       | INSIDE                 | 0.220                                           | 0.376                            | 1648.90             | 619.58              | 0.082                            | 1429.07             | 117.87              |
| A_68_P32141596 | chr19:46078435-46078479                           | NM_176785:489       | Hps6       | INSIDE                 | 0.054                                           | 0.718                            | 5887.53             | 4228.23             | 0.039                            | 4128.41             | 161.27              |
| A_68_P30634660 | chr16:29210031-29210075                           | NM_013751:272       | Hras1s     | INSIDE                 | 0.327                                           | 2.119                            | 4365.10             | 9249.79             | 0.692                            | 3160.65             | 2188.69             |
| A_68_P31940698 | chr19:7686824-7686868                             | NM_025731:-212      | Hras1s5    | DIVERGENT_PROMOTER     | 0.335                                           | 0.574                            | 1405.93             | 806.98              | 0.192                            | 1006.23             | 193.20              |
| A_68_P31940699 | chr19:7686892-7686936                             | NM_025731:-144      | Hras1s5    | DIVERGENT_PROMOTER     | 0.403                                           | 0.677                            | 2664.39             | 1803.92             | 0.273                            | 1908.10             | 520.63              |
| A_68_P29048047 | chr13:54287555-54287599                           | NM_008286:79        | Hrh2       | INSIDE                 | 0.519                                           | 0.549                            | 1330.37             | 730.23              | 0.285                            | 1098.78             | 313.18              |
| A_68_P21901451 | chr2:179838159-179838203                          | NM_133849:747       | Hrh3       | INSIDE                 | 0.238                                           | 0.507                            | 1884.94             | 955.40              | 0.121                            | 1411.15             | 170.36              |
| A_68_P24025031 | chr5:118619337-118619381                          | NM_007545:-414      | Hrk        | PROMOTER               | 0.317                                           | 0.580                            | 2371.16             | 1376.46             | 0.184                            | 1975.67             | 363.65              |
| A_68_P24025032 | chr5:118619420-118619464                          | NM_007545:-330      | Hrk        | PROMOTER               | 0.317                                           | 0.498                            | 2773.27             | 1380.12             | 0.158                            | 2013.37             | 317.57              |
| A_68_P24025033 | chr5:118619514-118619558                          | NM_007545:-236      | Hrk        | PROMOTER               | 0.425                                           | 0.690                            | 2723.58             | 1877.93             | 0.293                            | 1906.88             | 558.84              |
| A_68_P22603827 | chr3:144232599-144232643                          | NM_011828:560       | Hs2st1     | INSIDE                 | 0.574                                           | 0.592                            | 1626.19             | 963.49              | 0.340                            | 1213.11             | 412.60              |
| A_68_P23627555 | chr5:40036051-40036095                            | NM_010474:-202      | Hs3st1     | PROMOTER               | 0.375                                           | 0.628                            | 1564.74             | 982.98              | 0.236                            | 1171.99             | 276.35              |
| A_68_P25473609 | chr7:128536673-128536717                          | NM_001081327:885    | Hs3st2     | INSIDE                 | 0.533                                           | 0.527                            | 1665.04             | 877.49              | 0.281                            | 1382.91             | 388.38              |
| A_68_P25474217 | chr7:128643986-128644031                          | NM_001081327:108199 | Hs3st2     | INSIDE                 | 0.665                                           | 2.244                            | 1612.51             | 3618.03             | 1.493                            | 1081.08             | 1613.60             |
| A_68_P27865436 | chr11:64248735-64248779                           | NM_178870:-77       | Hs3st3a1   | PROMOTER               | 0.611                                           | 0.517                            | 1450.49             | 750.17              | 0.316                            | 1056.21             | 333.60              |
| A_68_P27865440 | chr11:64249134-64249178                           | NM_178870:323       | Hs3st3a1   | INSIDE                 | 0.644                                           | 0.627                            | 2304.24             | 1444.40             | 0.404                            | 1736.33             | 700.61              |
| A_68_P27862273 | chr11:63732747-63732791                           | NM_018805:3018      | Hs3st3b1   | INSIDE                 | 0.444                                           | 0.489                            | 1102.67             | 539.65              | 0.217                            | 913.95              | 198.59              |
| A_68_P27862287 | chr11:63734368-63734412                           | NM_018805:1396      | Hs3st3b1   | INSIDE                 | 0.250                                           | 0.540                            | 1175.52             | 634.46              | 0.135                            | 884.21              | 119.39              |
| A_68_P27862299 | chr11:63735880-63735924                           | NM_018805:-116      | Hs3st3b1   | PROMOTER               | 0.393                                           | 0.443                            | 2224.84             | 984.97              | 0.174                            | 1748.73             | 304.15              |
| A_68_P31099379 | chr17:24889503-24889547                           | NM_001012402:-423   | Hs3st6     | PROMOTER               | 0.607                                           | 0.650                            | 1028.18             | 668.07              | 0.394                            | 828.92              | 326.80              |
| A_68_P31099383 | chr17:24890123-24890167                           | NM_001012402:197    | Hs3st6     | INSIDE                 | 0.563                                           | 0.630                            | 1409.88             | 887.85              | 0.354                            | 1160.29             | 411.09              |
| A_68_P20146390 | chr1:36161035-36161084                            | NM_015818:35815     | Hs6st1     | INSIDE                 | 0.569                                           | 2.857                            | 777.68              | 2221.56             | 1.627                            | 582.83              | 948.01              |
| A_68_P32378022 | chrX:49033742-49033786                            | NM_015819:-110      | Hs6st2     | PROMOTER               | 0.123                                           | 2.217                            | 3471.88             | 7696.60             | 0.274                            | 1469.37             | 401.91              |
| A_68_P29942855 | chr14:119537625-119537669                         | NM_015820:160       | Hs6st3     | INSIDE                 | 0.226                                           | 0.665                            | 2929.87             | 1949.12             | 0.151                            | 2206.34             | 332.32              |
| A_68_P26213861 | chr8:121868279-121868323                          | NM_024219:-137      | Hsbp1      | PROMOTER               | 0.518                                           | 0.441                            | 1227.41             | 541.85              | 0.229                            | 953.94              | 218.26              |
| A_68_P26213863 | chr8:121868494-121868539                          | NM_024219:79        | Hsbp1      | INSIDE                 | 0.556                                           | 0.491                            | 1489.62             | 730.74              | 0.273                            | 1214.04             | 330.94              |
| A_68_P31863131 | chr18:80433374-80433418                           | NM_001136181:10445  | Hsbp111    | INSIDE                 | 0.453                                           | 0.493                            | 1290.37             | 635.51              | 0.223                            | 987.13              | 220.39              |
| A_68_P26134292 | chr8:108042458-108042502                          | NM_008289:-165      | Hsd11b2    | PROMOTER               | 0.326                                           | 0.425                            | 1518.41             | 646.07              | 0.139                            | 1128.21             | 156.61              |
| A_68_P26134295 | chr8:108042675-108042719                          | NM_008289:51        | Hsd11b2    | INSIDE                 | 0.406                                           | 0.730                            | 2677.10             | 1954.81             | 0.296                            | 1979.05             | 586.14              |
| A_68_P28071796 | chr11:100941137-100941181                         | NM_010475:1434      | Hsd17b1    | INSIDE                 | 0.532                                           | 0.657                            | 1392.13             | 915.02              | 0.350                            | 1086.16             | 379.97              |
| A_68_P28071797 | chr11:100941221-100941265                         | NM_010475:1518      | Hsd17b1    | INSIDE                 | 0.376                                           | 0.473                            | 1995.61             | 943.59              | 0.178                            | 1426.12             | 253.51              |
| A_68_P21439331 | chr2:93998296-93998341                            | NM_019657:-252      | Hsd17b12   | PROMOTER               | 0.361                                           | 0.543                            | 1429.19             | 775.83              | 0.196                            | 1119.20             | 219.20              |

| ProbeName      | Target position of probe on CpG island microarray | TargetID          | GeneSymbol | CpG island Description | Ratio of relative methylation (TiO2-NP/Vehicle) | Sham group                       |                     |                     | TiO <sub>2</sub> -H group        |                     |                     |
|----------------|---------------------------------------------------|-------------------|------------|------------------------|-------------------------------------------------|----------------------------------|---------------------|---------------------|----------------------------------|---------------------|---------------------|
|                |                                                   |                   |            |                        |                                                 | Relative methylation (Cy-5/Cy-3) | Cy-3 signal (Input) | Cy-5 signal (MeDIP) | Relative methylation (Cy-5/Cy-3) | Cy-3 signal (Input) | Cy-5 signal (MeDIP) |
| A_68_P22957172 | chr4:59594608-59594652                            | NM_024255:196     | Hsd12      | INSIDE                 | 0.225                                           | 0.569                            | 1682.05             | 957.35              | 0.128                            | 1278.50             | 164.03              |
| A_68_P30348596 | chr15:76307956-76308000                           | NM_008296:104     | Hsf1       | INSIDE                 | 0.455                                           | 0.471                            | 2542.92             | 1197.92             | 0.214                            | 2038.31             | 437.16              |
| A_68_P27315607 | chr10:86167637-86167681                           | NM_011631:531     | Hsp90b1    | INSIDE                 | 0.357                                           | 0.549                            | 932.23              | 511.68              | 0.196                            | 762.34              | 149.49              |
| A_68_P27315611 | chr10:86167975-86168019                           | NM_011631:193     | Hsp90b1    | INSIDE                 | 0.363                                           | 0.537                            | 1931.18             | 1037.46             | 0.195                            | 1607.35             | 313.11              |
| A_68_P32215807 | chr19:58935699-58935743                           | NM_175199:-246    | Hspa12a    | PROMOTER               | 0.312                                           | 0.612                            | 1871.08             | 1144.36             | 0.191                            | 1301.11             | 248.26              |
| A_68_P30880659 | chr16:75766853-75766897                           | NM_030201:189     | Hspa13     | INSIDE                 | 0.339                                           | 0.641                            | 1975.32             | 1266.08             | 0.217                            | 1430.94             | 311.12              |
| A_68_P20962883 | chr2:3429988-3430032                              | NM_015765:76      | Hspa14     | INSIDE                 | 0.217                                           | 0.456                            | 1304.03             | 594.09              | 0.099                            | 1207.04             | 119.60              |
| A_68_P28553824 | chr12:77505751-77505795                           | NM_008301:416     | Hspa2      | INSIDE                 | 0.286                                           | 0.465                            | 1427.90             | 663.73              | 0.133                            | 1109.00             | 147.26              |
| A_68_P28553835 | chr12:77507209-77507257                           | NM_008301:1876    | Hspa2      | INSIDE                 | 0.291                                           | 0.577                            | 2070.19             | 1195.39             | 0.168                            | 1492.84             | 250.92              |
| A_68_P27804084 | chr11:53114187-53114231                           | NM_008300:-227    | Hspa4      | PROMOTER               | 0.489                                           | 0.540                            | 1122.90             | 606.22              | 0.264                            | 1038.25             | 274.20              |
| A_68_P21129648 | chr2:34627186-34627230                            | NM_001163434:-401 | Hspa5      | PROMOTER               | 0.177                                           | 0.707                            | 1444.82             | 1022.11             | 0.125                            | 1126.15             | 140.86              |
| A_68_P21129649 | chr2:34627324-34627368                            | NM_001163434:-263 | Hspa5      | PROMOTER               | 0.330                                           | 0.648                            | 834.51              | 540.35              | 0.214                            | 726.60              | 155.31              |
| A_68_P21129653 | chr2:34627681-34627725                            | NM_001163434:93   | Hspa5      | INSIDE                 | 0.293                                           | 0.620                            | 2180.82             | 1351.86             | 0.182                            | 1776.45             | 322.79              |
| A_68_P21129656 | chr2:34628056-34628100                            | NM_001163434:469  | Hspa5      | INSIDE                 | 0.299                                           | 0.482                            | 1166.19             | 562.07              | 0.144                            | 957.86              | 138.21              |
| A_68_P21129657 | chr2:34628148-34628192                            | NM_001163434:561  | Hspa5      | INSIDE                 | 0.140                                           | 0.581                            | 2196.73             | 1276.73             | 0.082                            | 1521.06             | 124.03              |
| A_68_P26445378 | chr9:40608813-40608857                            | NM_031165:-521    | Hspa8      | PROMOTER               | 0.425                                           | 0.415                            | 4533.39             | 1882.56             | 0.177                            | 3146.44             | 555.59              |
| A_68_P26445379 | chr9:40608906-40608950                            | NM_031165:-427    | Hspa8      | PROMOTER               | 0.542                                           | 0.499                            | 1949.01             | 972.53              | 0.271                            | 1501.36             | 406.35              |
| A_68_P26445381 | chr9:40609139-40609183                            | NM_031165:-195    | Hspa8      | PROMOTER               | 0.400                                           | 0.691                            | 1034.99             | 714.85              | 0.276                            | 879.47              | 242.73              |
| A_68_P31615691 | chr18:35113624-35113674                           | NM_010481:357     | Hspa9      | INSIDE                 | 0.153                                           | 0.436                            | 2560.61             | 1117.66             | 0.067                            | 1810.03             | 120.69              |
| A_68_P24118365 | chr5:136364296-136364340                          | NM_013560:530     | Hspb1      | INSIDE                 | 0.224                                           | 0.692                            | 2438.28             | 1688.50             | 0.155                            | 1753.64             | 272.50              |
| A_68_P23364007 | chr4:140981800-140981844                          | NM_013868:5129    | Hspb7      | DOWNSTREAM             | 0.180                                           | 0.706                            | 2165.62             | 1527.90             | 0.127                            | 1598.95             | 202.64              |
| A_68_P20240337 | chr1:55144375-55144419                            | NM_010477:380     | Hspd1      | INSIDE                 | 0.519                                           | 0.594                            | 2443.80             | 1450.86             | 0.308                            | 2004.29             | 617.99              |
| A_68_P20240341 | chr1:55144942-55144986                            | NM_008303:-27     | Hspe1      | DIVERGENT_PROMOTER     | 0.619                                           | 0.470                            | 1872.90             | 879.42              | 0.291                            | 1633.71             | 475.15              |
| A_68_P20240344 | chr1:55145241-55145285                            | NM_008303:271     | Hspe1      | INSIDE                 | 0.650                                           | 0.475                            | 1246.14             | 592.43              | 0.309                            | 1020.33             | 315.22              |
| A_68_P23339949 | chr4:137024813-137024857                          | NM_008305:117     | Hspg2      | INSIDE                 | 0.377                                           | 0.550                            | 1992.29             | 1095.14             | 0.207                            | 1580.28             | 327.18              |
| A_68_P24186279 | chr5:150438537-150438581                          | NM_013559:332     | Hsph1      | INSIDE                 | 0.610                                           | 0.641                            | 2614.15             | 1675.15             | 0.391                            | 1852.45             | 724.07              |
| A_68_P24186280 | chr5:150438607-150438651                          | NM_013559:262     | Hsph1      | INSIDE                 | 0.438                                           | 0.698                            | 2606.55             | 1819.58             | 0.306                            | 2104.52             | 643.74              |
| A_68_P24186282 | chr5:150438837-150438890                          | NM_013559:27      | Hsph1      | INSIDE                 | 0.168                                           | 0.493                            | 2255.05             | 1112.39             | 0.083                            | 1597.19             | 132.49              |
| A_68_P25114497 | chr7:57014275-57014319                            | NM_001146049:-179 | Htatip2    | PROMOTER               | 0.147                                           | 0.632                            | 1827.68             | 1155.55             | 0.093                            | 1317.74             | 122.80              |
| A_68_P32399258 | chrX:54306421-54306465                            | NM_028242:-304    | Htatsf1    | PROMOTER               | 0.305                                           | 1.509                            | 1586.32             | 2393.78             | 0.460                            | 638.68              | 293.87              |
| A_68_P29296002 | chr13:106234796-106234840                         | NM_008308:1046    | Htr1a      | INSIDE                 | 0.218                                           | 0.643                            | 948.61              | 609.97              | 0.140                            | 855.18              | 119.97              |
| A_68_P26674970 | chr9:81525437-81525481                            | NM_010482:701     | Htr1b      | INSIDE                 | 0.131                                           | 1.657                            | 1442.29             | 2389.37             | 0.216                            | 1120.28             | 242.37              |
| A_68_P26674977 | chr9:81526156-81526200                            | NM_010482:-19     | Htr1b      | PROMOTER               | 0.333                                           | 0.609                            | 1347.49             | 821.18              | 0.203                            | 987.29              | 200.17              |
| A_68_P23333862 | chr4:135980297-135980341                          | NM_008309:880     | Htr1d      | INSIDE                 | 0.215                                           | 0.525                            | 2722.47             | 1430.04             | 0.113                            | 2013.17             | 227.22              |
| A_68_P32727713 | chrX:143397691-143397735                          | NM_008312:657     | Htr2c      | INSIDE                 | 0.139                                           | 2.080                            | 4322.19             | 8992.22             | 0.289                            | 1750.79             | 505.29              |
| A_68_P32727714 | chrX:143397800-143397847                          | NM_008312:768     | Htr2c      | INSIDE                 | 0.091                                           | 2.948                            | 1053.02             | 3104.47             | 0.268                            | 438.49              | 117.56              |
| A_68_P20567331 | chr1:123424359-123424403                          | NM_010483:662     | Htr5b      | INSIDE                 | 0.526                                           | 0.452                            | 1275.69             | 576.62              | 0.238                            | 1193.13             | 283.71              |
| A_68_P23349538 | chr4:138631686-138631730                          | NM_021358:-1004   | Htr6       | PROMOTER               | 0.459                                           | 0.532                            | 1016.76             | 540.52              | 0.244                            | 826.12              | 201.40              |
| A_68_P32087893 | chr19:36131475-36131520                           | NM_008315:353     | Htr7       | INSIDE                 | 0.223                                           | 0.528                            | 1413.08             | 746.73              | 0.118                            | 997.15              | 117.36              |
| A_68_P24591138 | chr6:83004321-83004365                            | NM_019752:223     | Htra2      | INSIDE                 | 0.205                                           | 0.536                            | 1358.99             | 728.89              | 0.110                            | 1125.58             | 123.95              |
| A_68_P24591139 | chr6:83004504-83004548                            | NM_019752:39      | Htra2      | INSIDE                 | 0.305                                           | 0.427                            | 1777.44             | 759.46              | 0.130                            | 1307.76             | 170.57              |
| A_68_P25724987 | chr8:26149339-26149383                            | NM_001081187:74   | Htra4      | INSIDE                 | 0.231                                           | 0.672                            | 1954.50             | 1313.09             | 0.155                            | 1484.86             | 230.09              |
| A_68_P23596023 | chr5:35104298-35104342                            | NM_010414:-68     | Htt        | PROMOTER               | 0.265                                           | 0.687                            | 1410.34             | 968.64              | 0.182                            | 1169.35             | 212.81              |
| A_68_P27581115 | chr11:8910943-8910987                             | NM_008316:176     | Hus1       | INSIDE                 | 0.174                                           | 0.398                            | 2247.94             | 893.58              | 0.069                            | 1759.14             | 121.96              |



| ProbeName      | Target position of probe on CpG island microarray | TargetID          | GeneSymbol | CpG island Description | Ratio of relative methylation (TiO2-NP/Vehicle) | Sham group                       |                     |                     | TiO <sub>2</sub> -H group        |                     |                     |
|----------------|---------------------------------------------------|-------------------|------------|------------------------|-------------------------------------------------|----------------------------------|---------------------|---------------------|----------------------------------|---------------------|---------------------|
|                |                                                   |                   |            |                        |                                                 | Relative methylation (Cy-5/Cy-3) | Cy-3 signal (Input) | Cy-5 signal (MeDIP) | Relative methylation (Cy-5/Cy-3) | Cy-3 signal (Input) | Cy-5 signal (MeDIP) |
| A_68_P27581116 | chr11:8911066-8911110                             | NM_008316:52      | Hus1       | INSIDE                 | 0.273                                           | 0.739                            | 2270.54             | 1677.16             | 0.201                            | 1638.68             | 330.14              |
| A_68_P32746462 | chrX:148237878-148237922                          | NM_021523:76      | Huwe1      | INSIDE                 | 0.205                                           | 1.411                            | 1026.71             | 1449.13             | 0.289                            | 400.33              | 115.65              |
| A_68_P32746463 | chrX:148237989-148238033                          | NM_021523:186     | Huwe1      | INSIDE                 | 0.239                                           | 1.935                            | 1360.84             | 2633.43             | 0.463                            | 563.26              | 260.79              |
| A_68_P32746464 | chrX:148238102-148238146                          | NM_021523:300     | Huwe1      | INSIDE                 | 0.036                                           | 2.197                            | 4454.26             | 9785.52             | 0.079                            | 1640.12             | 129.40              |
| A_68_P32746467 | chrX:148238346-148238395                          | NM_021523:546     | Huwe1      | INSIDE                 | 0.095                                           | 2.035                            | 1820.13             | 3704.42             | 0.194                            | 592.67              | 115.02              |
| A_68_P32746468 | chrX:148238435-148238479                          | NM_021523:632     | Huwe1      | INSIDE                 | 0.109                                           | 2.829                            | 3242.16             | 9171.33             | 0.309                            | 1114.26             | 343.91              |
| A_68_P26809621 | chr9:107471601-107471645                          | NM_010489:129     | Hyal2      | INSIDE                 | 0.238                                           | 0.650                            | 1680.29             | 1091.95             | 0.155                            | 1121.80             | 173.51              |
| A_68_P26809702 | chr9:107483108-107483152                          | NM_178020:-496    | Hyal3      | PROMOTER               | 0.294                                           | 0.647                            | 961.49              | 622.42              | 0.190                            | 705.09              | 134.26              |
| A_68_P26467268 | chr9:44187370-44187414                            | NM_021395:-180    | Hyou1      | PROMOTER               | 0.378                                           | 0.624                            | 891.20              | 555.89              | 0.236                            | 721.21              | 170.23              |
| A_68_P26467270 | chr9:44187680-44187724                            | NM_021395:130     | Hyou1      | INSIDE                 | 0.089                                           | 0.715                            | 2770.75             | 1981.99             | 0.064                            | 2056.23             | 131.22              |
| A_68_P29026628 | chr13:49777406-49777450                           | NM_172015:-70     | Iars       | PROMOTER               | 0.496                                           | 0.548                            | 1193.14             | 653.29              | 0.272                            | 896.64              | 243.65              |
| A_68_P29026629 | chr13:49777484-49777528                           | NM_172015:8       | Iars       | INSIDE                 | 0.547                                           | 0.646                            | 1137.31             | 735.03              | 0.354                            | 945.69              | 334.59              |
| A_68_P26695696 | chr9:85642551-85642595                            | NM_001081282:369  | Ibtk       | INSIDE                 | 0.239                                           | 0.442                            | 1600.14             | 707.26              | 0.106                            | 1319.07             | 139.30              |
| A_68_P26345149 | chr9:20836417-20836466                            | NM_008319:-40     | Icam5      | PROMOTER               | 0.348                                           | 0.531                            | 1368.90             | 726.47              | 0.184                            | 1163.21             | 214.58              |
| A_68_P26658578 | chr9:78023836-78023880                            | NM_019987:62814   | Ick        | DOWNSTREAM             | 0.607                                           | 0.721                            | 1741.92             | 1256.45             | 0.438                            | 1372.60             | 601.28              |
| A_68_P27271936 | chr10:77532518-77532562                           | NM_015790:428     | Icosl      | INSIDE                 | 0.496                                           | 0.466                            | 1122.48             | 522.87              | 0.231                            | 925.33              | 213.67              |
| A_68_P28153290 | chr11:115265346-115265390                         | NM_026729:289     | Ict1       | INSIDE                 | 0.281                                           | 0.584                            | 2127.27             | 1242.61             | 0.164                            | 1491.93             | 245.07              |
| A_68_P28153291 | chr11:115265419-115265463                         | NM_026729:361     | Ict1       | INSIDE                 | 0.097                                           | 0.611                            | 3100.80             | 1893.09             | 0.059                            | 2044.59             | 121.42              |
| A_68_P28293528 | chr12:25783564-25783608                           | NM_010496:-2629   | Id2        | PROMOTER               | 0.177                                           | 0.597                            | 1489.70             | 889.03              | 0.105                            | 1139.54             | 120.04              |
| A_68_P23332244 | chr4:135691181-135691230                          | NM_008321:-8531   | Id3        | PROMOTER               | 0.171                                           | 1.592                            | 548.78              | 873.47              | 0.272                            | 421.95              | 114.84              |
| A_68_P23332336 | chr4:135703661-135703706                          | NM_008321:3947    | Id3        | DOWNSTREAM             | 0.441                                           | 0.505                            | 1280.31             | 646.71              | 0.223                            | 1010.68             | 225.39              |
| A_68_P29018477 | chr13:48357119-48357169                           | NM_031166:349     | Id4        | INSIDE                 | 0.099                                           | 0.601                            | 2733.85             | 1642.16             | 0.059                            | 1996.37             | 118.19              |
| A_68_P20296826 | chr1:65225580-65225625                            | NM_010497:114     | Idh1       | INSIDE                 | 0.147                                           | 0.530                            | 2027.47             | 1073.80             | 0.078                            | 1536.58             | 119.71              |
| A_68_P26526551 | chr9:54434255-54434299                            | NM_029573:-41     | Idh3a      | PROMOTER               | 0.366                                           | 0.643                            | 3186.60             | 2048.03             | 0.235                            | 2635.93             | 620.29              |
| A_68_P26526554 | chr9:54434551-54434595                            | NM_029573:255     | Idh3a      | INSIDE                 | 0.478                                           | 0.328                            | 1901.35             | 623.56              | 0.157                            | 1481.35             | 232.28              |
| A_68_P21628930 | chr2:130109870-130109914                          | NM_130884:295     | Idh3b      | INSIDE                 | 0.172                                           | 0.606                            | 6715.17             | 4072.51             | 0.104                            | 4499.49             | 469.42              |
| A_68_P26020946 | chr8:87180770-87180814                            | NM_010499:5959    | Ier2       | DOWNSTREAM             | 0.511                                           | 0.431                            | 2241.58             | 965.52              | 0.220                            | 1678.43             | 369.65              |
| A_68_P26020977 | chr8:87186135-87186179                            | NM_010499:595     | Ier2       | INSIDE                 | 0.301                                           | 0.488                            | 1879.99             | 917.11              | 0.147                            | 1500.50             | 220.21              |
| A_68_P26020978 | chr8:87186231-87186275                            | NM_010499:499     | Ier2       | INSIDE                 | 0.399                                           | 0.277                            | 1961.30             | 542.96              | 0.110                            | 1579.44             | 174.25              |
| A_68_P26020979 | chr8:87186333-87186377                            | NM_010499:397     | Ier2       | INSIDE                 | 0.203                                           | 0.426                            | 1628.62             | 694.60              | 0.086                            | 1404.48             | 121.32              |
| A_68_P20735832 | chr1:156945633-156945677                          | NM_010500:1112    | Ier5       | INSIDE                 | 0.497                                           | 0.656                            | 1503.64             | 986.31              | 0.326                            | 1275.79             | 415.95              |
| A_68_P24818962 | chr6:125095826-125095870                          | NM_001039669:580  | Iffo1      | INSIDE                 | 0.439                                           | 0.591                            | 2255.04             | 1333.38             | 0.260                            | 1958.61             | 508.31              |
| A_68_P23352769 | chr4:139130258-139130302                          | NM_001205173:-354 | Iffo2      | PROMOTER               | 0.163                                           | 0.602                            | 1547.58             | 931.48              | 0.098                            | 1193.31             | 117.01              |
| A_68_P23352770 | chr4:139130352-139130396                          | NM_001205173:-260 | Iffo2      | PROMOTER               | 0.123                                           | 0.618                            | 4871.11             | 3009.05             | 0.076                            | 3422.52             | 259.95              |
| A_68_P23352775 | chr4:139130999-139131044                          | NM_001205173:387  | Iffo2      | INSIDE                 | 0.320                                           | 0.390                            | 1390.57             | 542.36              | 0.125                            | 1300.49             | 162.46              |
| A_68_P23352779 | chr4:139131562-139131606                          | NM_001205173:950  | Iffo2      | INSIDE                 | 0.426                                           | 0.661                            | 998.98              | 660.53              | 0.282                            | 773.34              | 217.78              |
| A_68_P30962573 | chr16:91372961-91373005                           | NM_001110498:-45  | Ifnar2     | PROMOTER               | 0.369                                           | 1.806                            | 1740.37             | 3143.44             | 0.667                            | 1253.02             | 835.76              |
| A_68_P30963516 | chr16:91547641-91547685                           | NM_008338:324     | Ifngr2     | INSIDE                 | 0.520                                           | 0.638                            | 1030.78             | 658.13              | 0.332                            | 884.86              | 293.86              |
| A_68_P28377236 | chr12:40949170-40949214                           | NM_013562:584     | Ifrd1      | INSIDE                 | 0.437                                           | 0.528                            | 1354.55             | 715.20              | 0.231                            | 1160.77             | 267.99              |
| A_68_P28377242 | chr12:40949783-40949827                           | NM_013562:-28     | Ifrd1      | PROMOTER               | 0.592                                           | 0.410                            | 2672.45             | 1096.43             | 0.243                            | 1962.72             | 476.90              |
| A_68_P28377243 | chr12:40949898-40949942                           | NM_013562:-144    | Ifrd1      | PROMOTER               | 0.393                                           | 0.573                            | 1938.73             | 1110.44             | 0.225                            | 1465.35             | 330.17              |
| A_68_P26809753 | chr9:107489861-107489907                          | NM_025903:-164    | Ifrd2      | PROMOTER               | 0.325                                           | 0.636                            | 3494.17             | 2221.47             | 0.207                            | 2465.15             | 509.70              |
| A_68_P26809754 | chr9:107489944-107489988                          | NM_025903:-82     | Ifrd2      | PROMOTER               | 0.301                                           | 0.503                            | 1227.58             | 618.03              | 0.152                            | 1004.00             | 152.27              |
| A_68_P24773305 | chr6:115803441-115803485                          | NM_001167763:-83  | Ifl122     | DIVERGENT_PROMOTER     | 0.210                                           | 0.521                            | 4045.60             | 2107.25             | 0.110                            | 2545.14             | 279.03              |

| ProbeName      | Target position of probe on CpG island microarray | TargetID           | GeneSymbol | CpG island Description | Ratio of relative methylation (TiO2-NP/Vehicle) | Sham group                       |                     |                     | TiO <sub>2</sub> -H group        |                     |                     |
|----------------|---------------------------------------------------|--------------------|------------|------------------------|-------------------------------------------------|----------------------------------|---------------------|---------------------|----------------------------------|---------------------|---------------------|
|                |                                                   |                    |            |                        |                                                 | Relative methylation (Cy-5/Cy-3) | Cy-3 signal (Input) | Cy-5 signal (MeDIP) | Relative methylation (Cy-5/Cy-3) | Cy-3 signal (Input) | Cy-5 signal (MeDIP) |
| A_68_P27943941 | chr11:78349868-78349912                           | NM_018854:-47      | Ifi20      | DIVERGENT_PROMOTER     | 0.224                                           | 0.677                            | 994.15              | 672.98              | 0.152                            | 774.97              | 117.66              |
| A_68_P30358260 | chr15:78004836-78004880                           | NM_025931:-320     | Ifi27      | PROMOTER               | 0.584                                           | 0.484                            | 2458.65             | 1188.88             | 0.282                            | 1884.91             | 532.31              |
| A_68_P30746980 | chr16:49699315-49699359                           | NM_028680:-70      | Ifi57      | PROMOTER               | 0.481                                           | 0.699                            | 3152.72             | 2204.33             | 0.336                            | 2447.18             | 822.39              |
| A_68_P23118613 | chr4:94281110-94281154                            | NM_026319:-78      | Ifi74      | PROMOTER               | 0.657                                           | 0.505                            | 2146.78             | 1083.81             | 0.332                            | 1823.82             | 605.34              |
| A_68_P26586063 | chr9:64989672-64989716                            | NM_008988:699      | Igdcc3     | INSIDE                 | 0.204                                           | 0.657                            | 1706.16             | 1121.37             | 0.134                            | 1289.38             | 173.05              |
| A_68_P26586064 | chr9:64989806-64989850                            | NM_008988:833      | Igdcc3     | INSIDE                 | 0.468                                           | 0.560                            | 1358.97             | 761.54              | 0.262                            | 1042.01             | 273.08              |
| A_68_P26585801 | chr9:64949612-64949656                            | NM_020043:333      | Igdcc4     | INSIDE                 | 0.658                                           | 0.627                            | 1439.01             | 901.83              | 0.412                            | 1230.41             | 507.04              |
| A_68_P25196754 | chr7:75097245-75097289                            | NM_010513:124      | Igf1r      | INSIDE                 | 0.396                                           | 0.473                            | 3320.88             | 1569.80             | 0.187                            | 2477.45             | 464.14              |
| A_68_P25196760 | chr7:75097984-75098028                            | NM_010513:864      | Igf1r      | INSIDE                 | 0.269                                           | 0.593                            | 1006.02             | 596.44              | 0.160                            | 755.73              | 120.65              |
| A_68_P25596355 | chr7:149844923-149844967                          | NM_010514:-235     | Igf2       | DIVERGENT_PROMOTER     | 0.462                                           | 0.591                            | 1490.03             | 880.28              | 0.273                            | 1202.79             | 328.42              |
| A_68_P25596366 | chr7:149846243-149846296                          | NM_001122736:671   | Igf2       | INSIDE                 | 0.265                                           | 0.565                            | 1149.75             | 649.23              | 0.150                            | 816.65              | 122.26              |
| A_68_P25596368 | chr7:149846445-149846489                          | NM_001122736:474   | Igf2       | INSIDE                 | 0.577                                           | 0.370                            | 1630.36             | 603.75              | 0.214                            | 1179.04             | 252.07              |
| A_68_P25596369 | chr7:149846534-149846578                          | NM_001122736:384   | Igf2       | INSIDE                 | 0.517                                           | 0.596                            | 1727.31             | 1029.74             | 0.308                            | 1472.01             | 453.38              |
| A_68_P25596372 | chr7:149846899-149846943                          | NM_001122736:20    | Igf2       | INSIDE                 | 0.516                                           | 0.713                            | 1993.94             | 1421.96             | 0.368                            | 1828.72             | 673.07              |
| A_68_P28041910 | chr11:95866408-95866452                           | NM_009951:828      | Igf2bp1    | INSIDE                 | 0.446                                           | 0.728                            | 1676.59             | 1220.03             | 0.325                            | 1247.96             | 405.26              |
| A_68_P28041913 | chr11:95866656-95866701                           | NM_009951:580      | Igf2bp1    | INSIDE                 | 0.384                                           | 0.502                            | 1598.54             | 802.29              | 0.193                            | 1273.94             | 245.79              |
| A_68_P28041914 | chr11:95866847-95866891                           | NM_009951:390      | Igf2bp1    | INSIDE                 | 0.619                                           | 0.704                            | 1657.30             | 1166.79             | 0.436                            | 1324.37             | 577.04              |
| A_68_P28041918 | chr11:95867212-95867256                           | NM_009951:24       | Igf2bp1    | INSIDE                 | 0.492                                           | 0.525                            | 1538.94             | 807.91              | 0.258                            | 1191.60             | 307.57              |
| A_68_P28041927 | chr11:95868155-95868199                           | NM_009951:-918     | Igf2bp1    | PROMOTER               | 0.562                                           | 0.548                            | 986.48              | 540.10              | 0.308                            | 926.11              | 284.97              |
| A_68_P28041932 | chr11:95868837-95868881                           | NM_009951:-1600    | Igf2bp1    | PROMOTER               | 0.215                                           | 0.678                            | 3053.63             | 2071.81             | 0.146                            | 2236.41             | 326.97              |
| A_68_P30596435 | chr16:22163008-22163052                           | NM_183029:342      | Igf2bp2    | INSIDE                 | 0.385                                           | 0.488                            | 2271.92             | 1109.15             | 0.188                            | 1725.01             | 324.49              |
| A_68_P24431596 | chr6:49163809-49163853                            | NM_023670:1123     | Igf2bp3    | INSIDE                 | 0.552                                           | 0.528                            | 1902.95             | 1004.54             | 0.291                            | 1562.22             | 455.06              |
| A_68_P24431635 | chr6:49168267-49168311                            | NM_023670:-3335    | Igf2bp3    | PROMOTER               | 0.634                                           | 0.694                            | 1529.37             | 1061.34             | 0.440                            | 1187.27             | 522.47              |
| A_68_P31053798 | chr17:12962714-12962758                           | NM_010515:-164     | Igf2r      | PROMOTER               | 0.257                                           | 0.470                            | 1654.62             | 777.03              | 0.121                            | 1331.45             | 160.65              |
| A_68_P20339086 | chr1:72872062-72872107                            | NM_008342:1008     | Igf2bp2    | INSIDE                 | 0.390                                           | 0.451                            | 1799.04             | 811.95              | 0.176                            | 1379.23             | 242.69              |
| A_68_P27572319 | chr11:7114101-7114145                             | NM_008343:-196     | Igf2bp3    | PROMOTER               | 0.595                                           | 0.390                            | 1367.48             | 533.25              | 0.232                            | 1066.04             | 247.33              |
| A_68_P25082509 | chr7:50721683-50721727                            | NM_001164518:23689 | Iglon5     | DOWNSTREAM             | 0.201                                           | 1.425                            | 2700.72             | 3849.50             | 0.286                            | 1906.16             | 544.92              |
| A_68_P23356006 | chr4:139665293-139665352                          | NM_198610:137404   | Igsf21     | INSIDE                 | 0.173                                           | 0.509                            | 1799.44             | 915.72              | 0.088                            | 1372.39             | 120.92              |
| A_68_P23356913 | chr4:139800280-139800324                          | NM_198610:2424     | Igsf21     | INSIDE                 | 0.134                                           | 0.551                            | 2225.57             | 1226.01             | 0.074                            | 1662.21             | 122.44              |
| A_68_P22375208 | chr3:101255145-101255189                          | NM_207205:74119    | Igsf3      | INSIDE                 | 0.660                                           | 2.628                            | 1387.42             | 3646.05             | 1.733                            | 1171.12             | 2029.91             |
| A_68_P20832289 | chr1:174242640-174242684                          | NM_080419:125      | Igsf8      | INSIDE                 | 0.373                                           | 0.710                            | 3360.31             | 2386.34             | 0.265                            | 2568.71             | 680.25              |
| A_68_P20833276 | chr1:174412036-174412080                          | NM_001145800:-285  | Igsf9      | PROMOTER               | 0.396                                           | 0.574                            | 1317.37             | 756.65              | 0.228                            | 1156.57             | 263.21              |
| A_68_P26375207 | chr9:27107032-27107084                            | NM_001033323:246   | Igsf9b     | INSIDE                 | 0.114                                           | 0.563                            | 2596.28             | 1460.71             | 0.064                            | 1879.35             | 120.86              |
| A_68_P26375211 | chr9:27107465-27107509                            | NM_001033323:674   | Igsf9b     | INSIDE                 | 0.597                                           | 0.520                            | 2186.28             | 1137.52             | 0.310                            | 1657.82             | 514.59              |
| A_68_P26375217 | chr9:27108097-27108141                            | NM_001033323:1306  | Igsf9b     | INSIDE                 | 0.076                                           | 0.581                            | 3690.51             | 2144.89             | 0.044                            | 2698.86             | 118.66              |
| A_68_P20351506 | chr1:74997489-74997533                            | NM_010544:715      | Ihh        | INSIDE                 | 0.354                                           | 0.591                            | 2779.98             | 1643.39             | 0.210                            | 2146.31             | 449.65              |
| A_68_P20351509 | chr1:74997858-74997902                            | NM_010544:345      | Ihh        | INSIDE                 | 0.216                                           | 0.535                            | 4688.95             | 2509.03             | 0.115                            | 3681.84             | 425.12              |
| A_68_P20351515 | chr1:74998648-74998692                            | NM_010544:-445     | Ihh        | PROMOTER               | 0.190                                           | 0.582                            | 1885.80             | 1097.69             | 0.111                            | 1479.57             | 163.90              |
| A_68_P31625592 | chr18:36904491-36904538                           | NM_011879:205      | Ik         | INSIDE                 | 0.136                                           | 0.678                            | 1751.88             | 1188.45             | 0.092                            | 1303.10             | 120.10              |
| A_68_P27340037 | chr10:90564728-90564779                           | NM_027078:18970    | Ikbip      | INSIDE                 | 0.663                                           | 2.282                            | 1345.04             | 3069.80             | 1.513                            | 1012.31             | 1531.59             |
| A_68_P25528244 | chr7:138553556-138553600                          | NM_175115:414      | Ikzf5      | INSIDE                 | 0.639                                           | 0.435                            | 1298.19             | 564.92              | 0.278                            | 1130.82             | 314.23              |
| A_68_P27805842 | chr11:53449954-53449998                           | NM_008355:-1772    | Il13       | PROMOTER               | 0.147                                           | 0.532                            | 2695.44             | 1433.25             | 0.078                            | 1983.97             | 155.09              |
| A_68_P31759174 | chr18:61852045-61852089                           | NM_019508:4478     | Il17b      | INSIDE                 | 0.427                                           | 0.524                            | 1291.49             | 676.38              | 0.224                            | 892.38              | 199.63              |
| A_68_P24798577 | chr6:120413598-120413642                          | NM_008359:406      | Il17ra     | INSIDE                 | 0.512                                           | 0.712                            | 1682.85             | 1198.87             | 0.365                            | 1554.18             | 566.60              |

| ProbeName      | Target position of probe on CpG island microarray | TargetID          | GeneSymbol | CpG island Description | Ratio of relative methylation (TiO2-NP/Vehicle) | Sham group                       |                     |                     | TiO <sub>2</sub> -H group        |                     |                     |
|----------------|---------------------------------------------------|-------------------|------------|------------------------|-------------------------------------------------|----------------------------------|---------------------|---------------------|----------------------------------|---------------------|---------------------|
|                |                                                   |                   |            |                        |                                                 | Relative methylation (Cy-5/Cy-3) | Cy-3 signal (Input) | Cy-5 signal (MeDIP) | Relative methylation (Cy-5/Cy-3) | Cy-3 signal (Input) | Cy-5 signal (MeDIP) |
| A_68_P24798580 | chr6:120413892-120413937                          | NM_008359:700     | Il17ra     | INSIDE                 | 0.207                                           | 0.566                            | 1714.17             | 969.72              | 0.117                            | 1354.93             | 158.53              |
| A_68_P29503210 | chr14:30821909-30821953                           | NM_019583:152     | Il17rb     | INSIDE                 | 0.514                                           | 0.416                            | 2050.39             | 853.93              | 0.214                            | 1709.47             | 366.18              |
| A_68_P24759769 | chr6:113432843-113432887                          | NM_134159:11416   | Il17rc     | INSIDE                 | 0.286                                           | 0.272                            | 2040.65             | 555.79              | 0.078                            | 1604.13             | 124.97              |
| A_68_P29484662 | chr14:27852087-27852131                           | NM_134437:-78     | Il17rd     | PROMOTER               | 0.296                                           | 0.552                            | 2127.06             | 1175.11             | 0.164                            | 1552.07             | 254.16              |
| A_68_P29484663 | chr14:27852219-27852263                           | NM_134437:54      | Il17rd     | INSIDE                 | 0.557                                           | 0.516                            | 1253.38             | 646.71              | 0.287                            | 1027.00             | 295.15              |
| A_68_P29484665 | chr14:27852530-27852574                           | NM_134437:366     | Il17rd     | INSIDE                 | 0.285                                           | 0.660                            | 1194.43             | 787.81              | 0.188                            | 981.10              | 184.21              |
| A_68_P29484669 | chr14:27852875-27852920                           | NM_134437:711     | Il17rd     | INSIDE                 | 0.238                                           | 0.594                            | 1284.13             | 763.21              | 0.142                            | 940.23              | 133.05              |
| A_68_P30621545 | chr16:26581869-26581913                           | NM_134103:100     | Il1rap     | INSIDE                 | 0.276                                           | 0.543                            | 1535.69             | 834.13              | 0.150                            | 1253.52             | 188.11              |
| A_68_P20170820 | chr1:40382866-40382910                            | NM_133193:1417    | Il1rl2     | INSIDE                 | 0.613                                           | 0.599                            | 1729.41             | 1035.11             | 0.367                            | 1317.23             | 483.15              |
| A_68_P26017803 | chr8:86566236-86566280                            | NM_016671:216     | Il27ra     | INSIDE                 | 0.543                                           | 0.727                            | 3520.60             | 2560.29             | 0.395                            | 2614.92             | 1033.06             |
| A_68_P25089586 | chr7:52095494-52095538                            | NM_010215:3859    | Il4i1      | INSIDE                 | 0.341                                           | 0.638                            | 2333.35             | 1487.96             | 0.218                            | 1821.13             | 396.55              |
| A_68_P21929617 | chr3:7612894-7612938                              | NM_008371:511     | Il7        | INSIDE                 | 0.485                                           | 0.523                            | 1153.86             | 603.00              | 0.254                            | 1067.39             | 270.70              |
| A_68_P30676660 | chr16:36694130-36694174                           | NM_134109:29      | Illdr1     | INSIDE                 | 0.363                                           | 0.478                            | 1591.35             | 760.33              | 0.173                            | 1257.76             | 217.96              |
| A_68_P22325452 | chr3:90280402-90280446                            | NM_026374:302     | Ilf2       | INSIDE                 | 0.145                                           | 0.691                            | 1734.83             | 1198.46             | 0.100                            | 1432.82             | 143.04              |
| A_68_P26346746 | chr9:21172514-21172558                            | NM_001042708:90   | Ilf3       | INSIDE                 | 0.313                                           | 0.616                            | 1991.46             | 1226.19             | 0.193                            | 1459.73             | 281.48              |
| A_68_P28382007 | chr12:41750810-41750854                           | NM_053122:156     | Immp21     | INSIDE                 | 0.454                                           | 0.572                            | 2021.80             | 1155.65             | 0.260                            | 1681.86             | 436.50              |
| A_68_P24538442 | chr6:71781548-71781592                            | NM_029673:246     | Immt       | INSIDE                 | 0.643                                           | 0.674                            | 1186.21             | 799.41              | 0.433                            | 1013.46             | 439.12              |
| A_68_P24538443 | chr6:71781629-71781673                            | NM_029673:326     | Immt       | INSIDE                 | 0.217                                           | 0.595                            | 1774.79             | 1056.80             | 0.129                            | 1573.85             | 203.49              |
| A_68_P24538445 | chr6:71781870-71781919                            | NM_029673:570     | Immt       | INSIDE                 | 0.180                                           | 0.503                            | 1708.21             | 858.99              | 0.090                            | 1305.46             | 118.05              |
| A_68_P20138851 | chr1:34496844-34496888                            | NM_178601:193     | Imp4       | INSIDE                 | 0.123                                           | 0.647                            | 1745.92             | 1129.72             | 0.079                            | 1505.66             | 119.43              |
| A_68_P31791018 | chr18:67449050-67449094                           | NM_053261:196     | Impa2      | INSIDE                 | 0.180                                           | 0.744                            | 4171.49             | 3104.40             | 0.134                            | 3098.51             | 414.33              |
| A_68_P31791020 | chr18:67449254-67449298                           | NM_053261:400     | Impa2      | INSIDE                 | 0.027                                           | 1.454                            | 5572.36             | 8102.62             | 0.040                            | 3547.63             | 141.36              |
| A_68_P22698894 | chr4:4719763-4719807                              | NM_177730:669     | Impad1     | INSIDE                 | 0.524                                           | 0.687                            | 1867.04             | 1283.49             | 0.360                            | 1425.36             | 513.73              |
| A_68_P24325220 | chr6:29161862-29161906                            | NM_011829:387     | Impdh1     | INSIDE                 | 0.215                                           | 0.573                            | 1491.16             | 854.85              | 0.123                            | 969.70              | 119.71              |
| A_68_P24325222 | chr6:29162054-29162098                            | NM_011829:195     | Impdh1     | INSIDE                 | 0.524                                           | 0.560                            | 2574.26             | 1441.17             | 0.293                            | 1716.21             | 503.33              |
| A_68_P26815429 | chr9:108462952-108462996                          | NM_011830:143     | Impdh2     | INSIDE                 | 0.634                                           | 0.703                            | 3132.35             | 2201.00             | 0.446                            | 2559.36             | 1140.39             |
| A_68_P23138265 | chr4:98062281-98062325                            | NM_001005784:-214 | Inad1      | PROMOTER               | 0.173                                           | 0.541                            | 1634.56             | 885.02              | 0.094                            | 1289.39             | 120.79              |
| A_68_P31947333 | chr19:9973849-9973893                             | NM_016692:153     | Incenp     | INSIDE                 | 0.456                                           | 0.477                            | 1230.50             | 586.85              | 0.218                            | 1017.30             | 221.28              |
| A_68_P28751073 | chr12:113827105-113827149                         | NM_198411:132     | Inf2       | INSIDE                 | 0.554                                           | 0.528                            | 1145.20             | 604.34              | 0.292                            | 902.36              | 263.67              |
| A_68_P25656209 | chr8:11555685-11555729                            | NM_011919:-359    | Ing1       | DIVERGENT_PROMOTER     | 0.208                                           | 1.456                            | 5723.71             | 8334.47             | 0.302                            | 3509.69             | 1061.17             |
| A_68_P25656212 | chr8:11555954-11555998                            | NM_011919:-89     | Ing1       | DIVERGENT_PROMOTER     | 0.374                                           | 0.539                            | 1788.90             | 964.77              | 0.202                            | 1283.50             | 259.05              |
| A_68_P25656213 | chr8:11556085-11556129                            | NM_011919:41      | Ing1       | INSIDE                 | 0.172                                           | 0.477                            | 1844.84             | 879.72              | 0.082                            | 1463.77             | 120.37              |
| A_68_P25656225 | chr8:11557852-11557899                            | NM_011919:1810    | Ing1       | INSIDE                 | 0.563                                           | 0.540                            | 1067.19             | 576.73              | 0.304                            | 871.63              | 265.32              |
| A_68_P20556963 | chr1:121316999-121317043                          | NM_008381:1805    | Inhbb      | INSIDE                 | 0.253                                           | 0.588                            | 1608.71             | 945.72              | 0.148                            | 1229.97             | 182.62              |
| A_68_P20556978 | chr1:121319090-121319134                          | NM_008381:-287    | Inhbb      | PROMOTER               | 0.609                                           | 0.628                            | 862.01              | 541.47              | 0.383                            | 748.04              | 286.33              |
| A_68_P21569912 | chr2:119303420-119303464                          | NM_026574:-77     | Ino80      | PROMOTER               | 0.294                                           | 0.436                            | 3829.81             | 1671.27             | 0.128                            | 2908.06             | 373.43              |
| A_68_P20285211 | chr1:63160025-63160069                            | NM_001081436:795  | Ino80d     | INSIDE                 | 0.354                                           | 0.658                            | 1881.88             | 1237.76             | 0.233                            | 1522.45             | 354.36              |
| A_68_P20285212 | chr1:63160117-63160161                            | NM_001081436:703  | Ino80d     | INSIDE                 | 0.501                                           | 0.624                            | 979.00              | 610.57              | 0.312                            | 833.36              | 260.19              |
| A_68_P20229133 | chr1:52874369-52874413                            | NM_008384:142     | Inpp1      | INSIDE                 | 0.330                                           | 0.522                            | 1016.33             | 530.28              | 0.172                            | 755.61              | 130.05              |
| A_68_P20229134 | chr1:52874442-52874486                            | NM_008384:68      | Inpp1      | INSIDE                 | 0.653                                           | 0.730                            | 2012.80             | 1468.90             | 0.476                            | 1592.47             | 758.51              |
| A_68_P25577540 | chr7:146574599-146574643                          | NM_001127363:-387 | Inpp5a     | PROMOTER               | 0.131                                           | 0.719                            | 1925.47             | 1384.90             | 0.094                            | 1298.73             | 122.41              |
| A_68_P25577541 | chr7:146574687-146574731                          | NM_001127363:-299 | Inpp5a     | PROMOTER               | 0.065                                           | 0.647                            | 5097.15             | 3297.48             | 0.042                            | 3693.72             | 155.70              |
| A_68_P23270089 | chr4:124428703-124428747                          | NM_008385:9603    | Inpp5b     | INSIDE                 | 0.232                                           | 0.511                            | 2225.93             | 1136.63             | 0.118                            | 1843.02             | 218.23              |
| A_68_P23270091 | chr4:124428867-124428911                          | NM_008385:9767    | Inpp5b     | INSIDE                 | 0.362                                           | 0.653                            | 4855.24             | 3170.40             | 0.236                            | 3669.14             | 867.58              |

| ProbeName      | Target position of probe on CpG island microarray | TargetID           | GeneSymbol | CpG island Description | Ratio of relative methylation (TiO2-NP/Vehicle) | Sham group                       |                     |                     | TiO <sub>2</sub> -H group        |                     |                     |
|----------------|---------------------------------------------------|--------------------|------------|------------------------|-------------------------------------------------|----------------------------------|---------------------|---------------------|----------------------------------|---------------------|---------------------|
|                |                                                   |                    |            |                        |                                                 | Relative methylation (Cy-5/Cy-3) | Cy-3 signal (Input) | Cy-5 signal (MeDIP) | Relative methylation (Cy-5/Cy-3) | Cy-3 signal (Input) | Cy-5 signal (MeDIP) |
| A_68_P25511565 | chr7:135754795-135754839                          | NM_178641:-62      | Inpp5f     | PROMOTER               | 0.458                                           | 1.619                            | 4253.80             | 6888.80             | 0.741                            | 2914.50             | 2160.59             |
| A_68_P27927255 | chr11:75444500-75444544                           | NM_008916:1        | Inpp5k     | INSIDE                 | 0.384                                           | 0.649                            | 799.68              | 519.12              | 0.249                            | 623.68              | 155.52              |
| A_68_P27927256 | chr11:75444673-75444717                           | NM_008916:173      | Inpp5k     | INSIDE                 | 0.215                                           | 0.604                            | 2194.17             | 1324.53             | 0.130                            | 1601.96             | 207.50              |
| A_68_P25375733 | chr7:108986683-108986727                          | NM_001122739:-366  | Inpp1l     | PROMOTER               | 0.314                                           | 0.672                            | 1783.11             | 1198.28             | 0.211                            | 1355.05             | 285.97              |
| A_68_P23560507 | chr5:28398167-28398211                            | NM_153526:237      | Insig1     | INSIDE                 | 0.227                                           | 0.447                            | 2884.31             | 1288.71             | 0.102                            | 2063.02             | 209.57              |
| A_68_P20566309 | chr1:123224172-123224218                          | NM_133748:145      | Insig2     | INSIDE                 | 0.557                                           | 0.487                            | 1336.67             | 651.27              | 0.272                            | 1040.86             | 282.63              |
| A_68_P21717106 | chr2:146048812-146048856                          | NM_016889:1102     | Insm1      | INSIDE                 | 0.449                                           | 0.614                            | 980.36              | 601.66              | 0.275                            | 894.71              | 246.48              |
| A_68_P28452661 | chr12:56701135-56701179                           | NM_020287:1253     | Insm2      | INSIDE                 | 0.484                                           | 0.448                            | 1892.63             | 848.42              | 0.217                            | 1554.72             | 336.97              |
| A_68_P25613343 | chr8:3279377-3279421                              | NM_010568:219      | Insr       | INSIDE                 | 0.550                                           | 0.481                            | 1718.27             | 825.72              | 0.264                            | 1383.28             | 365.34              |
| A_68_P22310076 | chr3:87600886-87600930                            | NM_011832:36       | Insr       | INSIDE                 | 0.371                                           | 0.623                            | 1828.87             | 1138.98             | 0.231                            | 1451.56             | 335.52              |
| A_68_P25944668 | chr8:71317470-71317515                            | NM_027590:-360     | Ints10     | PROMOTER               | 0.539                                           | 0.605                            | 1118.93             | 677.13              | 0.326                            | 919.07              | 299.85              |
| A_68_P27987929 | chr11:86070620-86070664                           | NM_027421:428      | Ints2      | INSIDE                 | 0.352                                           | 0.715                            | 2228.60             | 1593.16             | 0.252                            | 1750.76             | 440.53              |
| A_68_P27987932 | chr11:86070867-86070911                           | NM_027421:182      | Ints2      | INSIDE                 | 0.603                                           | 0.513                            | 1126.92             | 578.10              | 0.310                            | 851.72              | 263.63              |
| A_68_P22325243 | chr3:90237709-90237753                            | NM_145540:-172     | Ints3      | PROMOTER               | 0.315                                           | 0.558                            | 932.57              | 520.14              | 0.176                            | 714.91              | 125.68              |
| A_68_P29657354 | chr14:63379882-63379926                           | NM_008715:45       | Ints6      | INSIDE                 | 0.271                                           | 0.529                            | 1051.19             | 555.92              | 0.143                            | 831.51              | 119.01              |
| A_68_P20938882 | chr1:193399613-193399657                          | NM_178632:22       | Ints7      | INSIDE                 | 0.481                                           | 0.496                            | 1494.60             | 741.54              | 0.239                            | 1079.60             | 257.53              |
| A_68_P20938885 | chr1:193399879-193399925                          | NM_178632:290      | Ints7      | INSIDE                 | 0.593                                           | 0.450                            | 1340.38             | 603.72              | 0.267                            | 1058.05             | 282.71              |
| A_68_P22728834 | chr4:11181339-11181383                            | NM_178112:46       | Ints8      | INSIDE                 | 0.250                                           | 0.522                            | 1918.88             | 1001.82             | 0.130                            | 1572.92             | 205.05              |
| A_68_P26812406 | chr9:107905251-107905295                          | NM_013785:294      | Ipf6k1     | INSIDE                 | 0.292                                           | 0.362                            | 1542.06             | 558.32              | 0.106                            | 1152.15             | 121.73              |
| A_68_P27234954 | chr10:70811019-70811063                           | NM_027184:500      | Ipmk       | INSIDE                 | 0.301                                           | 0.628                            | 4411.32             | 2769.91             | 0.189                            | 3306.52             | 624.87              |
| A_68_P27234955 | chr10:70811089-70811133                           | NM_027184:570      | Ipmk       | INSIDE                 | 0.417                                           | 0.432                            | 2655.26             | 1145.79             | 0.180                            | 1984.07             | 356.94              |
| A_68_P27235134 | chr10:70844276-70844325                           | NM_027184:33760    | Ipmk       | INSIDE                 | 0.538                                           | 4.305                            | 163.15              | 702.31              | 2.317                            | 208.29              | 482.53              |
| A_68_P23237284 | chr4:117587755-117587799                          | NM_146152:-172     | Ipo13      | PROMOTER               | 0.262                                           | 0.488                            | 2105.90             | 1028.05             | 0.128                            | 1536.08             | 196.84              |
| A_68_P29618998 | chr14:56254267-56254311                           | NM_024267:227      | Ipo4       | INSIDE                 | 0.203                                           | 0.579                            | 1225.27             | 709.22              | 0.117                            | 1024.29             | 120.17              |
| A_68_P29619000 | chr14:56254517-56254561                           | NM_024267:-23      | Ipo4       | PROMOTER               | 0.282                                           | 0.292                            | 2453.01             | 716.88              | 0.083                            | 1878.48             | 155.04              |
| A_68_P29952573 | chr14:121310169-121310213                         | NM_023579:-225     | Ipo5       | PROMOTER               | 0.567                                           | 0.540                            | 973.95              | 525.93              | 0.306                            | 813.28              | 249.18              |
| A_68_P25411259 | chr7:117161867-117161911                          | NM_181517:-50      | Ipo7       | PROMOTER               | 0.515                                           | 0.552                            | 949.56              | 524.16              | 0.284                            | 874.94              | 248.56              |
| A_68_P24942331 | chr6:148779822-148779866                          | NM_001081113:145   | Ipo8       | INSIDE                 | 0.411                                           | 0.555                            | 1755.36             | 974.80              | 0.228                            | 1369.02             | 312.29              |
| A_68_P23297601 | chr4:129296491-129296543                          | NM_198026:-179     | Iqcc       | PROMOTER               | 0.273                                           | 0.658                            | 823.66              | 542.29              | 0.180                            | 657.74              | 118.15              |
| A_68_P24142813 | chr5:141177968-141178012                          | NM_028833:342      | Iqcc       | INSIDE                 | 0.292                                           | 0.567                            | 1355.69             | 769.13              | 0.166                            | 1178.25             | 195.26              |
| A_68_P24142814 | chr5:141178050-141178094                          | NM_028833:260      | Iqcc       | INSIDE                 | 0.272                                           | 0.508                            | 2849.60             | 1446.95             | 0.138                            | 2303.75             | 318.65              |
| A_68_P22311640 | chr3:87886128-87886172                            | NM_001033484:178   | Iqgap3     | INSIDE                 | 0.327                                           | 0.640                            | 1080.27             | 691.66              | 0.209                            | 843.99              | 176.78              |
| A_68_P24634427 | chr6:90686065-90686109                            | NM_001134384:74031 | Iqsec1     | INSIDE                 | 0.358                                           | 0.691                            | 2105.16             | 1454.81             | 0.247                            | 1692.06             | 418.36              |
| A_68_P24634428 | chr6:90686241-90686285                            | NM_001134384:73855 | Iqsec1     | INSIDE                 | 0.579                                           | 0.678                            | 2612.91             | 1772.44             | 0.393                            | 2089.01             | 820.01              |
| A_68_P24804130 | chr6:121363049-121363093                          | NM_001033354:60626 | Iqsec3     | INSIDE                 | 0.283                                           | 0.662                            | 1510.78             | 1000.13             | 0.187                            | 1176.93             | 220.64              |
| A_68_P24804136 | chr6:121363612-121363660                          | NM_001033354:60606 | Iqsec3     | INSIDE                 | 0.394                                           | 1.459                            | 861.78              | 1257.28             | 0.575                            | 728.64              | 419.21              |
| A_68_P26528146 | chr9:54711666-54711710                            | NM_022655:127      | Ireb2      | INSIDE                 | 0.236                                           | 0.537                            | 2123.00             | 1139.14             | 0.127                            | 1638.59             | 207.48              |
| A_68_P27806467 | chr11:53584134-53584178                           | NM_001159396:182   | Irf1       | INSIDE                 | 0.594                                           | 0.577                            | 2049.85             | 1182.05             | 0.343                            | 1649.48             | 565.15              |
| A_68_P25837684 | chr8:47825681-47825725                            | NM_008391:604      | Irf2       | INSIDE                 | 0.416                                           | 0.697                            | 1597.32             | 1112.68             | 0.290                            | 1181.44             | 342.31              |
| A_68_P24990858 | chr7:19589997-19590041                            | NM_178757:605      | Irf2bp1    | INSIDE                 | 0.512                                           | 0.649                            | 4180.13             | 2712.88             | 0.332                            | 3243.74             | 1076.99             |
| A_68_P26258430 | chr8:129118076-129118120                          | NM_001164598:-762  | Irf2bp2    | PROMOTER               | 0.400                                           | 0.721                            | 1718.04             | 1238.29             | 0.289                            | 1460.35             | 421.48              |
| A_68_P25090530 | chr7:52253328-52253372                            | NM_016849:321      | Irf3       | INSIDE                 | 0.334                                           | 0.476                            | 1097.47             | 522.34              | 0.159                            | 967.49              | 153.74              |
| A_68_P28918889 | chr13:30842632-30842676                           | NM_013674:1528     | Irf4       | INSIDE                 | 0.241                                           | 0.560                            | 2493.13             | 1395.72             | 0.135                            | 1806.47             | 243.41              |
| A_68_P20947552 | chr1:194979319-194979363                          | NM_016851:35       | Irf6       | INSIDE                 | 0.517                                           | 0.616                            | 967.79              | 596.45              | 0.319                            | 873.62              | 278.55              |

| ProbeName      | Target position of probe on CpG island microarray | TargetID          | GeneSymbol | CpG island Description | Ratio of relative methylation (TiO2-NP/Vehicle) | Sham group                       |                     |                     | TiO <sub>2</sub> -H group        |                     |                     |
|----------------|---------------------------------------------------|-------------------|------------|------------------------|-------------------------------------------------|----------------------------------|---------------------|---------------------|----------------------------------|---------------------|---------------------|
|                |                                                   |                   |            |                        |                                                 | Relative methylation (Cy-5/Cy-3) | Cy-3 signal (Input) | Cy-5 signal (MeDIP) | Relative methylation (Cy-5/Cy-3) | Cy-3 signal (Input) | Cy-5 signal (MeDIP) |
| A_68_P26222126 | chr8:123259917-123259961                          | NM_008320:-337    | Irf8       | PROMOTER               | 0.653                                           | 0.582                            | 1630.42             | 949.18              | 0.380                            | 1302.79             | 495.12              |
| A_68_P26222129 | chr8:123260367-123260411                          | NM_008320:113     | Irf8       | INSIDE                 | 0.342                                           | 0.452                            | 1790.75             | 808.66              | 0.154                            | 1437.85             | 222.07              |
| A_68_P25005382 | chr7:25316864-25316908                            | NM_153134:1220    | Irgq       | INSIDE                 | 0.657                                           | 0.592                            | 1466.50             | 868.70              | 0.389                            | 1098.25             | 427.25              |
| A_68_P25005383 | chr7:25316968-25317015                            | NM_153134:1325    | Irgq       | INSIDE                 | 0.103                                           | 0.685                            | 2313.36             | 1585.67             | 0.070                            | 1710.32             | 120.50              |
| A_68_P20391651 | chr1:82280179-82280223                            | NM_010570:7814    | Irs1       | INSIDE                 | 0.658                                           | 0.653                            | 5226.48             | 3411.42             | 0.430                            | 3985.50             | 1712.03             |
| A_68_P20391709 | chr1:82286790-82286834                            | NM_010570:1202    | Irs1       | INSIDE                 | 0.213                                           | 0.607                            | 1052.84             | 638.66              | 0.129                            | 882.24              | 114.25              |
| A_68_P20391713 | chr1:82287149-82287194                            | NM_010570:843     | Irs1       | INSIDE                 | 0.260                                           | 0.563                            | 1174.25             | 661.49              | 0.146                            | 876.78              | 128.25              |
| A_68_P20391714 | chr1:82287221-82287265                            | NM_010570:772     | Irs1       | INSIDE                 | 0.305                                           | 0.492                            | 1356.43             | 668.02              | 0.150                            | 930.38              | 139.95              |
| A_68_P20391723 | chr1:82288408-82288452                            | NM_010570:-416    | Irs1       | PROMOTER               | 0.563                                           | 0.412                            | 1571.80             | 647.33              | 0.232                            | 1306.74             | 303.13              |
| A_68_P24126843 | chr5:138086478-138086522                          | NM_010571:442     | Irs3       | INSIDE                 | 0.541                                           | 0.522                            | 1114.03             | 581.40              | 0.282                            | 1075.10             | 303.33              |
| A_68_P29130721 | chr13:72100670-72100714                           | NM_010573:479     | Irx1       | INSIDE                 | 0.611                                           | 0.650                            | 1830.69             | 1189.90             | 0.397                            | 1628.53             | 647.06              |
| A_68_P29134809 | chr13:72766875-72766919                           | NM_010574:471     | Irx2       | INSIDE                 | 0.147                                           | 0.486                            | 2334.06             | 1134.35             | 0.071                            | 1873.96             | 133.64              |
| A_68_P29134820 | chr13:72768352-72768396                           | NM_010574:1949    | Irx2       | INSIDE                 | 0.238                                           | 0.681                            | 1921.84             | 1308.10             | 0.162                            | 1670.26             | 270.98              |
| A_68_P29134823 | chr13:72768727-72768771                           | NM_010574:2323    | Irx2       | INSIDE                 | 0.251                                           | 0.607                            | 1084.09             | 658.22              | 0.152                            | 791.69              | 120.70              |
| A_68_P26061534 | chr8:94325346-94325390                            | NM_008393:-95     | Irx3       | PROMOTER               | 0.142                                           | 0.667                            | 3841.50             | 2562.64             | 0.095                            | 2815.88             | 266.28              |
| A_68_P29138699 | chr13:73405898-73405942                           | NM_018885:7976    | Irx4       | INSIDE                 | 0.268                                           | 0.514                            | 1100.44             | 565.73              | 0.138                            | 856.73              | 118.21              |
| A_68_P26065130 | chr8:94880881-94880925                            | NM_018826:-792    | Irx5       | DIVERGENT_PROMOTER     | 0.169                                           | 0.542                            | 4847.98             | 2627.21             | 0.092                            | 3183.37             | 292.31              |
| A_68_P26065131 | chr8:94880961-94881005                            | NM_018826:-712    | Irx5       | DIVERGENT_PROMOTER     | 0.180                                           | 0.569                            | 2009.01             | 1142.78             | 0.103                            | 1364.64             | 139.90              |
| A_68_P26065134 | chr8:94881423-94881467                            | NM_018826:-250    | Irx5       | DIVERGENT_PROMOTER     | 0.224                                           | 0.710                            | 2622.75             | 1860.87             | 0.159                            | 1783.03             | 282.91              |
| A_68_P28600140 | chr12:86114302-86114346                           | NM_028863:105     | IscA2      | INSIDE                 | 0.102                                           | 1.409                            | 3398.71             | 4789.39             | 0.144                            | 2317.64             | 333.26              |
| A_68_P29356812 | chr13:117100315-117100359                         | NM_021459:-440    | Isl1       | PROMOTER               | 0.669                                           | 0.613                            | 1919.63             | 563.65              | 0.410                            | 921.77              | 377.86              |
| A_68_P26531858 | chr9:55388757-55388801                            | NM_027397:-177    | Isl2       | PROMOTER               | 0.238                                           | 0.401                            | 1516.64             | 608.33              | 0.096                            | 1249.83             | 119.39              |
| A_68_P26531866 | chr9:55389590-55389634                            | NM_027397:657     | Isl2       | INSIDE                 | 0.605                                           | 0.456                            | 1252.05             | 571.38              | 0.276                            | 1095.48             | 302.45              |
| A_68_P26531904 | chr9:55394018-55394062                            | NM_027397:5085    | Isl2       | DOWNSTREAM             | 0.427                                           | 0.331                            | 1731.85             | 572.49              | 0.141                            | 1133.06             | 159.91              |
| A_68_P26531906 | chr9:55394278-55394322                            | NM_027397:5345    | Isl2       | DOWNSTREAM             | 0.318                                           | 0.540                            | 1898.94             | 1024.76             | 0.172                            | 1440.71             | 247.57              |
| A_68_P26546333 | chr9:58046118-58046162                            | NM_001161535:3382 | Islr2      | INSIDE                 | 0.176                                           | 0.407                            | 3297.07             | 1343.18             | 0.072                            | 2350.88             | 169.01              |
| A_68_P26546335 | chr9:58046426-58046470                            | NM_001161535:3074 | Islr2      | INSIDE                 | 0.321                                           | 0.410                            | 1624.17             | 665.74              | 0.132                            | 1391.94             | 183.04              |
| A_68_P26546339 | chr9:58046840-58046884                            | NM_001161535:2660 | Islr2      | INSIDE                 | 0.337                                           | 0.666                            | 2409.98             | 1605.34             | 0.224                            | 1693.87             | 379.84              |
| A_68_P26546341 | chr9:58046993-58047037                            | NM_001161535:2508 | Islr2      | INSIDE                 | 0.257                                           | 0.594                            | 930.73              | 552.98              | 0.153                            | 796.38              | 121.54              |
| A_68_P26546344 | chr9:58047294-58047338                            | NM_001161535:2206 | Islr2      | INSIDE                 | 0.244                                           | 0.661                            | 1999.15             | 1322.25             | 0.162                            | 1417.19             | 228.96              |
| A_68_P26546363 | chr9:58049670-58049721                            | NM_001161540:-89  | Islr2      | PROMOTER               | 0.289                                           | 1.612                            | 3806.23             | 6134.04             | 0.466                            | 2481.86             | 1156.46             |
| A_68_P26546364 | chr9:58049788-58049832                            | NM_001161540:-204 | Islr2      | PROMOTER               | 0.385                                           | 1.676                            | 3041.84             | 5098.28             | 0.646                            | 2084.52             | 1346.23             |
| A_68_P21680283 | chr2:139502974-139503018                          | NM_001126490:-917 | Ism1       | PROMOTER               | 0.286                                           | 0.499                            | 2705.45             | 1349.99             | 0.142                            | 2069.31             | 294.85              |
| A_68_P21680286 | chr2:139503286-139503330                          | NM_001126490:-605 | Ism1       | PROMOTER               | 0.390                                           | 0.557                            | 2940.12             | 1637.95             | 0.217                            | 2220.95             | 482.08              |
| A_68_P28357924 | chr12:37108183-37108227                           | NM_178629:99      | Ispd       | INSIDE                 | 0.343                                           | 0.387                            | 2597.33             | 1005.23             | 0.133                            | 2013.78             | 267.18              |
| A_68_P25952871 | chr8:73119135-73119179                            | NM_023627:777     | Isyna1     | INSIDE                 | 0.363                                           | 1.400                            | 1995.11             | 2794.07             | 0.509                            | 1512.14             | 769.49              |
| A_68_P25952872 | chr8:73119238-73119282                            | NM_023627:881     | Isyna1     | INSIDE                 | 0.324                                           | 1.460                            | 800.52              | 1168.77             | 0.473                            | 778.01              | 367.89              |
| A_68_P26026699 | chr8:88364441-88364485                            | NM_028007:386     | Itfg1      | INSIDE                 | 0.162                                           | 0.527                            | 1729.81             | 911.22              | 0.085                            | 1423.62             | 121.35              |
| A_68_P28079666 | chr11:102317339-102317383                         | NM_010575:13837   | Itga2b     | INSIDE                 | 0.375                                           | 0.568                            | 2920.77             | 1658.07             | 0.213                            | 2054.87             | 437.17              |
| A_68_P28079749 | chr11:102328621-102328668                         | NM_010575:2553    | Itga2b     | INSIDE                 | 0.136                                           | 0.669                            | 2204.81             | 1475.73             | 0.091                            | 1409.57             | 127.98              |
| A_68_P28079750 | chr11:102328735-102328779                         | NM_010575:2441    | Itga2b     | INSIDE                 | 0.349                                           | 0.617                            | 1324.91             | 817.38              | 0.215                            | 995.03              | 214.03              |
| A_68_P28036509 | chr11:94937682-94937726                           | NM_013565:324     | Itga3      | INSIDE                 | 0.245                                           | 0.446                            | 1241.16             | 553.63              | 0.109                            | 1125.20             | 122.77              |
| A_68_P28036515 | chr11:94938400-94938444                           | NM_013565:-394    | Itga3      | PROMOTER               | 0.206                                           | 0.532                            | 1481.29             | 788.74              | 0.110                            | 1079.50             | 118.57              |
| A_68_P30503777 | chr15:103196605-103196649                         | NM_010577:553     | Itga5      | INSIDE                 | 0.457                                           | 0.686                            | 1752.04             | 1201.09             | 0.314                            | 1377.01             | 431.76              |

| ProbeName      | Target position of probe on CpG island microarray | TargetID           | GeneSymbol | CpG island Description | Ratio of relative methylation (TiO2-NP/Vehicle) | Sham group                       |                     |                     | TiO <sub>2</sub> -H group        |                     |                     |
|----------------|---------------------------------------------------|--------------------|------------|------------------------|-------------------------------------------------|----------------------------------|---------------------|---------------------|----------------------------------|---------------------|---------------------|
|                |                                                   |                    |            |                        |                                                 | Relative methylation (Cy-5/Cy-3) | Cy-3 signal (Input) | Cy-5 signal (MeDIP) | Relative methylation (Cy-5/Cy-3) | Cy-3 signal (Input) | Cy-5 signal (MeDIP) |
| A_68_P27543981 | chr10:128370721-128370765                         | NM_008398:-126     | Itga7      | PROMOTER               | 0.597                                           | 0.515                            | 1877.83             | 966.34              | 0.307                            | 1326.14             | 407.68              |
| A_68_P27543983 | chr10:128370926-128370976                         | NM_008398:82       | Itga7      | INSIDE                 | 0.191                                           | 0.597                            | 1527.24             | 911.40              | 0.114                            | 1089.23             | 123.86              |
| A_68_P27543984 | chr10:128371011-128371056                         | NM_008398:165      | Itga7      | INSIDE                 | 0.268                                           | 0.318                            | 1707.29             | 542.40              | 0.085                            | 1374.66             | 116.90              |
| A_68_P27543986 | chr10:128371189-128371233                         | NM_008398:342      | Itga7      | INSIDE                 | 0.307                                           | 0.442                            | 2370.25             | 1048.13             | 0.136                            | 1812.84             | 246.01              |
| A_68_P21010259 | chr2:12223211-12223256                            | NM_001001309:314   | Itga8      | INSIDE                 | 0.528                                           | 0.686                            | 1837.42             | 1260.25             | 0.362                            | 1435.62             | 519.59              |
| A_68_P21010261 | chr2:12223501-12223545                            | NM_001001309:25    | Itga8      | INSIDE                 | 0.228                                           | 0.609                            | 1016.91             | 618.98              | 0.139                            | 853.94              | 118.60              |
| A_68_P28279800 | chr12:21291772-21291816                           | NM_008403:304      | Itgb1bp1   | INSIDE                 | 0.434                                           | 0.300                            | 1716.13             | 514.83              | 0.130                            | 1348.71             | 175.47              |
| A_68_P28279803 | chr12:125634804-125634848                         | NM_008403:38       | Itgb1bp1   | INSIDE                 | 0.360                                           | 0.582                            | 1324.20             | 770.93              | 0.210                            | 996.58              | 208.90              |
| A_68_P28156586 | chr11:115836453-115836497                         | NM_001005608:436   | Itgb4      | INSIDE                 | 0.587                                           | 0.690                            | 1192.84             | 822.66              | 0.405                            | 1019.21             | 412.34              |
| A_68_P29717289 | chr14:73784847-73784891                           | NM_008410:210      | Itm2b      | INSIDE                 | 0.500                                           | 0.645                            | 1090.62             | 703.48              | 0.323                            | 962.78              | 310.73              |
| A_68_P20409050 | chr1:87791484-87791528                            | NM_022417:422      | Itm2c      | INSIDE                 | 0.299                                           | 0.703                            | 1596.53             | 1122.15             | 0.210                            | 1179.45             | 247.88              |
| A_68_P21571250 | chr2:119568776-119568820                          | NM_146125:726      | Itpka      | INSIDE                 | 0.500                                           | 0.466                            | 1121.11             | 522.59              | 0.233                            | 939.45              | 218.97              |
| A_68_P25016220 | chr7:28013751-28013795                            | NM_181593:-156     | Itpkc      | DIVERGENT_PROMOTER     | 0.317                                           | 0.561                            | 2029.10             | 1138.64             | 0.178                            | 1501.37             | 266.96              |
| A_68_P32152775 | chr19:47993384-47993428                           | NM_001001738:383   | Itprip     | INSIDE                 | 0.421                                           | 0.671                            | 1366.53             | 916.97              | 0.282                            | 1158.75             | 327.20              |
| A_68_P25458544 | chr7:125634804-125634848                          | NM_001033380:663   | Itrip12    | INSIDE                 | 0.647                                           | 0.423                            | 1217.89             | 514.67              | 0.273                            | 962.69              | 263.22              |
| A_68_P30964671 | chr16:91730311-91730355                           | NM_001110276:717   | Its1       | INSIDE                 | 0.321                                           | 0.667                            | 3983.80             | 2655.88             | 0.214                            | 2907.28             | 621.89              |
| A_68_P30964672 | chr16:91730394-91730438                           | NM_001110276:801   | Its1       | INSIDE                 | 0.287                                           | 0.630                            | 1288.50             | 812.30              | 0.181                            | 1078.75             | 195.21              |
| A_68_P20714215 | chr1:153191431-153191475                          | NM_001039511:-175  | Ivns1abp   | PROMOTER               | 0.311                                           | 0.459                            | 2192.95             | 1006.86             | 0.143                            | 1657.53             | 236.40              |
| A_68_P20714216 | chr1:153191544-153191588                          | NM_001039511:-61   | Ivns1abp   | PROMOTER               | 0.658                                           | 0.439                            | 1428.02             | 627.33              | 0.289                            | 1103.53             | 318.97              |
| A_68_P31601053 | chr18:32227655-32227699                           | NM_173441:289      | Iws1       | INSIDE                 | 0.459                                           | 0.618                            | 1034.83             | 640.04              | 0.284                            | 873.82              | 248.01              |
| A_68_P21666831 | chr2:136940212-136940256                          | NM_013822:2022     | Jag1       | INSIDE                 | 0.500                                           | 0.531                            | 1250.72             | 663.64              | 0.265                            | 875.80              | 232.27              |
| A_68_P24759516 | chr6:113392769-113392813                          | NM_026365:228      | Jag1       | INSIDE                 | 0.262                                           | 0.447                            | 1223.78             | 546.49              | 0.117                            | 1001.61             | 117.06              |
| A_68_P32051826 | chr19:29325786-29325831                           | NM_001048177:-509  | Jak2       | PROMOTER               | 0.498                                           | 0.408                            | 2178.12             | 887.94              | 0.203                            | 1962.57             | 398.06              |
| A_68_P23611439 | chr5:37482314-37482358                            | NM_178394:40241    | Jakmip1    | INSIDE                 | 0.433                                           | 0.619                            | 2076.52             | 1285.31             | 0.268                            | 1717.12             | 460.57              |
| A_68_P25574931 | chr7:146132875-146132921                          | NM_028708:466      | Jakmip3    | INSIDE                 | 0.314                                           | 0.348                            | 1561.07             | 543.97              | 0.109                            | 1085.34             | 118.67              |
| A_68_P30925477 | chr16:84774396-84774440                           | NM_023844:51       | Jam2       | INSIDE                 | 0.532                                           | 0.733                            | 2998.51             | 2199.19             | 0.391                            | 2229.88             | 870.81              |
| A_68_P26374353 | chr9:26962841-26962885                            | NM_023277:144      | Jam3       | INSIDE                 | 0.480                                           | 0.597                            | 940.40              | 561.62              | 0.287                            | 786.31              | 225.60              |
| A_68_P28997649 | chr13:44825063-44825107                           | NM_001205044:-1058 | Jarid2     | PROMOTER               | 0.558                                           | 0.532                            | 2829.26             | 1504.07             | 0.297                            | 2181.41             | 647.35              |
| A_68_P28997656 | chr13:44825977-44826021                           | NM_001205044:-144  | Jarid2     | PROMOTER               | 0.268                                           | 0.506                            | 1762.95             | 892.14              | 0.136                            | 1405.33             | 190.89              |
| A_68_P28997683 | chr13:44829152-44829196                           | NM_001205043:2535  | Jarid2     | INSIDE                 | 0.289                                           | 0.517                            | 2630.47             | 1360.22             | 0.150                            | 1836.55             | 274.76              |
| A_68_P24381996 | chr6:39156448-39156492                            | NM_001033430:302   | Jhdm1d     | INSIDE                 | 0.172                                           | 0.497                            | 4031.18             | 2004.31             | 0.085                            | 2675.98             | 228.51              |
| A_68_P28530099 | chr12:73186645-73186689                           | NM_001205067:-159  | Jkamp      | DIVERGENT_PROMOTER     | 0.125                                           | 0.505                            | 2580.37             | 1301.83             | 0.063                            | 2039.39             | 128.45              |
| A_68_P27836981 | chr11:59263741-59263785                           | NM_001205068:216   | Jmjd4      | INSIDE                 | 0.314                                           | 0.623                            | 2470.69             | 1539.18             | 0.196                            | 1856.16             | 362.91              |
| A_68_P28161570 | chr11:116704403-116704447                         | NM_033398:339      | Jmjd6      | INSIDE                 | 0.498                                           | 0.734                            | 2270.11             | 1665.81             | 0.366                            | 1630.54             | 596.14              |
| A_68_P21572764 | chr2:119853205-119853250                          | NM_001114637:9     | Jmjd7      | INSIDE                 | 0.631                                           | 0.580                            | 1744.85             | 1011.54             | 0.366                            | 1471.50             | 538.00              |
| A_68_P21572765 | chr2:119853360-119853404                          | NM_001114637:164   | Jmjd7      | INSIDE                 | 0.559                                           | 0.471                            | 1169.44             | 550.26              | 0.263                            | 993.44              | 261.09              |
| A_68_P20058158 | chr1:17087056-17087100                            | NM_020604:892      | Jph1       | INSIDE                 | 0.608                                           | 0.604                            | 1157.64             | 699.31              | 0.367                            | 976.90              | 358.60              |
| A_68_P21811852 | chr2:163165006-163165050                          | NM_021566:58681    | Jph2       | INSIDE                 | 0.579                                           | 2.985                            | 3279.26             | 9788.78             | 1.727                            | 2219.38             | 3833.21             |
| A_68_P21812066 | chr2:163201241-163201292                          | NM_021566:22443    | Jph2       | INSIDE                 | 0.485                                           | 1.413                            | 1545.63             | 2183.51             | 0.685                            | 1222.47             | 837.03              |
| A_68_P26228499 | chr8:124254393-124254437                          | NM_020605:-44      | Jph3       | PROMOTER               | 0.628                                           | 3.411                            | 9864.62             | 33653.00            | 2.144                            | 8324.80             | 17848.18            |
| A_68_P26228503 | chr8:124254738-124254782                          | NM_020605:302      | Jph3       | INSIDE                 | 0.493                                           | 0.662                            | 4592.01             | 3037.78             | 0.326                            | 3475.80             | 1132.46             |
| A_68_P26228504 | chr8:124254834-124254878                          | NM_020605:398      | Jph3       | INSIDE                 | 0.221                                           | 0.624                            | 5034.56             | 3142.71             | 0.138                            | 3573.54             | 492.61              |
| A_68_P26228651 | chr8:124276830-124276874                          | NM_020605:22394    | Jph3       | INSIDE                 | 0.632                                           | 4.407                            | 713.02              | 3142.37             | 2.786                            | 541.11              | 1507.67             |
| A_68_P26228658 | chr8:124277668-124277712                          | NM_020605:23232    | Jph3       | INSIDE                 | 0.607                                           | 3.557                            | 2747.82             | 9774.66             | 2.159                            | 1848.26             | 3989.51             |

| ProbeName      | Target position of probe on CpG island microarray | TargetID          | GeneSymbol | CpG island Description | Ratio of relative methylation (TiO2-NP/Vehicle) | Sham group                       |                     |                     | TiO <sub>2</sub> -H group        |                     |                     |
|----------------|---------------------------------------------------|-------------------|------------|------------------------|-------------------------------------------------|----------------------------------|---------------------|---------------------|----------------------------------|---------------------|---------------------|
|                |                                                   |                   |            |                        |                                                 | Relative methylation (Cy-5/Cy-3) | Cy-3 signal (Input) | Cy-5 signal (MeDIP) | Relative methylation (Cy-5/Cy-3) | Cy-3 signal (Input) | Cy-5 signal (MeDIP) |
| A_68_P29616405 | chr14:55733423-55733480                           | NM_177049:2321    | Jph4       | INSIDE                 | 0.427                                           | 7.920                            | 2258.91             | 17890.37            | 3.382                            | 1539.32             | 5205.58             |
| A_68_P29616406 | chr14:55733544-55733588                           | NM_177049:2206    | Jph4       | INSIDE                 | 0.441                                           | 3.348                            | 6057.86             | 20283.42            | 1.476                            | 3752.85             | 5537.91             |
| A_68_P29616408 | chr14:55733743-55733787                           | NM_177049:2008    | Jph4       | INSIDE                 | 0.300                                           | 0.666                            | 2341.23             | 1558.41             | 0.200                            | 1669.13             | 333.22              |
| A_68_P22324048 | chr3:90035364-90035413                            | NM_206924:-130    | Jtb        | PROMOTER               | 0.361                                           | 0.661                            | 985.75              | 651.65              | 0.239                            | 748.87              | 178.96              |
| A_68_P22324049 | chr3:90035487-90035531                            | NM_206924:-10     | Jtb        | PROMOTER               | 0.192                                           | 0.558                            | 1541.99             | 860.32              | 0.107                            | 1114.74             | 119.16              |
| A_68_P29613101 | chr14:55196302-55196346                           | NM_010590:174     | Jub        | INSIDE                 | 0.596                                           | 0.558                            | 3510.28             | 1958.95             | 0.333                            | 2838.90             | 944.66              |
| A_68_P29613102 | chr14:55196396-55196440                           | NM_010590:80      | Jub        | INSIDE                 | 0.387                                           | 0.605                            | 1082.21             | 654.80              | 0.234                            | 895.45              | 209.49              |
| A_68_P29613103 | chr14:55196489-55196533                           | NM_010590:-12     | Jub        | PROMOTER               | 0.267                                           | 0.694                            | 1422.73             | 986.66              | 0.185                            | 1056.41             | 195.74              |
| A_68_P23120702 | chr4:94717432-94717476                            | NM_010591:1459    | Jun        | INSIDE                 | 0.585                                           | 0.436                            | 1934.02             | 843.61              | 0.255                            | 1533.51             | 391.60              |
| A_68_P23120703 | chr4:94717558-94717602                            | NM_010591:1333    | Jun        | INSIDE                 | 0.286                                           | 0.666                            | 949.37              | 632.09              | 0.191                            | 754.96              | 143.85              |
| A_68_P23120704 | chr4:94717633-94717677                            | NM_010591:1259    | Jun        | INSIDE                 | 0.643                                           | 0.606                            | 1291.57             | 782.50              | 0.389                            | 973.89              | 379.20              |
| A_68_P23120706 | chr4:94717919-94717966                            | NM_010591:971     | Jun        | INSIDE                 | 0.151                                           | 0.574                            | 2266.77             | 1300.54             | 0.087                            | 1636.71             | 142.02              |
| A_68_P23120716 | chr4:94719068-94719112                            | NM_010591:-177    | Jun        | PROMOTER               | 0.402                                           | 0.423                            | 1296.90             | 548.96              | 0.170                            | 1043.85             | 177.68              |
| A_68_P26022960 | chr8:87502192-87502236                            | NM_008416:433     | Junb       | INSIDE                 | 0.236                                           | 0.503                            | 1916.97             | 964.93              | 0.119                            | 1434.02             | 170.04              |
| A_68_P26022961 | chr8:87502281-87502328                            | NM_008416:343     | Junb       | INSIDE                 | 0.209                                           | 0.546                            | 1447.23             | 789.73              | 0.114                            | 1027.33             | 117.18              |
| A_68_P26022975 | chr8:87504092-87504136                            | NM_008416:-1467   | Junb       | PROMOTER               | 0.498                                           | 0.681                            | 1146.44             | 780.67              | 0.339                            | 1015.43             | 344.21              |
| A_68_P25953468 | chr8:73223214-73223258                            | NM_010592:1599    | Jund       | INSIDE                 | 0.627                                           | 0.512                            | 1154.87             | 591.68              | 0.321                            | 776.61              | 249.48              |
| A_68_P28067851 | chr11:100258744-100258788                         | NM_010593:338     | Jup        | INSIDE                 | 0.570                                           | 0.483                            | 1464.57             | 706.93              | 0.275                            | 1199.55             | 330.09              |
| A_68_P28067855 | chr11:100259055-100259099                         | NM_010593:28      | Jup        | INSIDE                 | 0.298                                           | 0.567                            | 1550.90             | 879.40              | 0.169                            | 1126.51             | 190.56              |
| A_68_P32028425 | chr19:25311521-25311565                           | NM_181404:-149    | Kank1      | PROMOTER               | 0.607                                           | 0.703                            | 1355.53             | 953.17              | 0.426                            | 1111.31             | 473.97              |
| A_68_P32028428 | chr19:25311817-25311861                           | NM_181404:147     | Kank1      | INSIDE                 | 0.232                                           | 0.545                            | 1629.53             | 887.99              | 0.126                            | 1274.83             | 161.15              |
| A_68_P32028430 | chr19:25311947-25311991                           | NM_181404:277     | Kank1      | INSIDE                 | 0.257                                           | 0.619                            | 864.99              | 535.12              | 0.159                            | 721.55              | 114.79              |
| A_68_P32029540 | chr19:25484871-25484921                           | NM_181404:173205  | Kank1      | INSIDE                 | 0.454                                           | 3.394                            | 1099.41             | 3731.11             | 1.542                            | 863.42              | 1331.51             |
| A_68_P26348961 | chr9:21602785-21602833                            | NM_145611:182     | Kank2      | INSIDE                 | 0.035                                           | 1.396                            | 6997.57             | 9770.96             | 0.049                            | 4304.21             | 209.97              |
| A_68_P31150611 | chr17:33955093-33955137                           | NM_030697:7647    | Kank3      | INSIDE                 | 0.264                                           | 0.566                            | 1159.37             | 656.27              | 0.149                            | 953.33              | 142.35              |
| A_68_P31929693 | chr19:5610054-5610098                             | NR_037603:-369    | Kat5       | PROMOTER               | 0.416                                           | 0.475                            | 1492.43             | 709.00              | 0.198                            | 1082.98             | 214.21              |
| A_68_P26920442 | chr10:7446059-7446115                             | NM_011835:289     | Katna1     | INSIDE                 | 0.174                                           | 0.630                            | 1481.08             | 932.78              | 0.109                            | 1104.77             | 120.80              |
| A_68_P24182265 | chr5:149740293-149740337                          | NM_153572:-91     | Katnal1    | PROMOTER               | 0.361                                           | 0.641                            | 1163.83             | 745.85              | 0.231                            | 980.94              | 226.82              |
| A_68_P24182269 | chr5:149740788-149740832                          | NM_153572:-587    | Katnal1    | PROMOTER               | 0.239                                           | 0.629                            | 985.18              | 620.05              | 0.151                            | 799.08              | 120.28              |
| A_68_P26081252 | chr8:97605501-97605545                            | NM_028805:422     | Katnb1     | INSIDE                 | 0.615                                           | 2.298                            | 1639.11             | 3766.25             | 1.412                            | 1072.01             | 1513.75             |
| A_68_P32136346 | chr19:45154510-45154554                           | NM_178929:3904    | Kazald1    | DOWNSTREAM             | 0.305                                           | 0.521                            | 983.17              | 512.38              | 0.159                            | 772.46              | 122.97              |
| A_68_P32136351 | chr19:45155030-45155086                           | NM_178929:4430    | Kazald1    | DOWNSTREAM             | 0.049                                           | 1.432                            | 2706.42             | 3875.13             | 0.070                            | 1917.99             | 135.00              |
| A_68_P25678155 | chr8:15010976-15011020                            | NM_029116:-26     | Kbtbd11    | PROMOTER               | 0.275                                           | 0.533                            | 1164.45             | 621.09              | 0.146                            | 820.89              | 120.24              |
| A_68_P25678160 | chr8:15011568-15011612                            | NM_029116:566     | Kbtbd11    | INSIDE                 | 0.066                                           | 0.715                            | 3719.89             | 2659.04             | 0.047                            | 2653.43             | 124.50              |
| A_68_P25678163 | chr8:15011860-15011904                            | NM_029116:858     | Kbtbd11    | INSIDE                 | 0.391                                           | 0.478                            | 1570.57             | 749.98              | 0.186                            | 1240.73             | 231.39              |
| A_68_P26885525 | chr9:121687219-121687263                          | NM_028202:516     | Kbtbd5     | INSIDE                 | 0.269                                           | 0.493                            | 1103.61             | 543.89              | 0.133                            | 940.62              | 124.74              |
| A_68_P24660675 | chr6:95067758-95067802                            | NM_001008785:-119 | Kbtbd8     | PROMOTER               | 0.631                                           | 0.493                            | 1453.92             | 716.41              | 0.311                            | 1223.34             | 380.35              |
| A_68_P24660676 | chr6:95067884-95067930                            | NM_001008785:7    | Kbtbd8     | INSIDE                 | 0.423                                           | 0.501                            | 1384.91             | 693.50              | 0.212                            | 1067.31             | 226.27              |
| A_68_P24828002 | chr6:126593244-126593288                          | NM_010595:2553    | Kcna1      | INSIDE                 | 0.060                                           | 0.726                            | 3643.30             | 2644.31             | 0.043                            | 2703.77             | 116.95              |
| A_68_P24828015 | chr6:126594566-126594610                          | NM_010595:1231    | Kcna1      | INSIDE                 | 0.262                                           | 0.549                            | 1578.22             | 866.29              | 0.144                            | 1290.65             | 185.56              |
| A_68_P24828016 | chr6:126594679-126594723                          | NM_010595:1119    | Kcna1      | INSIDE                 | 0.244                                           | 0.503                            | 1603.48             | 807.19              | 0.123                            | 1380.67             | 169.72              |
| A_68_P24828020 | chr6:126595162-126595206                          | NM_010595:635     | Kcna1      | INSIDE                 | 0.437                                           | 0.607                            | 1548.56             | 939.63              | 0.265                            | 1216.48             | 322.52              |
| A_68_P22404200 | chr3:106904965-106905010                          | NM_008417:503     | Kcna2      | INSIDE                 | 0.470                                           | 0.491                            | 1476.98             | 725.75              | 0.231                            | 1028.24             | 237.46              |
| A_68_P22403737 | chr3:106839605-106839649                          | NM_008418:547     | Kcna3      | INSIDE                 | 0.184                                           | 0.548                            | 3062.15             | 1679.45             | 0.101                            | 2124.46             | 214.84              |

| ProbeName      | Target position of probe on CpG island microarray | TargetID            | GeneSymbol | CpG island Description | Ratio of relative methylation (TiO2-NP/Vehicle) | Sham group                       |                     |                     | TiO <sub>2</sub> -H group        |                     |                     |
|----------------|---------------------------------------------------|---------------------|------------|------------------------|-------------------------------------------------|----------------------------------|---------------------|---------------------|----------------------------------|---------------------|---------------------|
|                |                                                   |                     |            |                        |                                                 | Relative methylation (Cy-5/Cy-3) | Cy-3 signal (Input) | Cy-5 signal (MeDIP) | Relative methylation (Cy-5/Cy-3) | Cy-3 signal (Input) | Cy-5 signal (MeDIP) |
| A_68_P22403738 | chr3:106839716-106839760                          | NM_008418:659       | Kcna3      | INSIDE                 | 0.250                                           | 0.358                            | 1902.64             | 680.64              | 0.089                            | 1325.33             | 118.41              |
| A_68_P27894382 | chr11:69145803-69145849                           | NM_010599:6067      | Kcnab3     | INSIDE                 | 0.211                                           | 0.615                            | 1137.58             | 699.65              | 0.130                            | 919.99              | 119.25              |
| A_68_P25098817 | chr7:53652411-53652455                            | NM_001112739:566    | Kcnc1      | INSIDE                 | 0.550                                           | 0.504                            | 2277.86             | 1147.36             | 0.277                            | 1965.29             | 544.59              |
| A_68_P25098818 | chr7:53652536-53652580                            | NM_001112739:692    | Kcnc1      | INSIDE                 | 0.407                                           | 0.400                            | 1311.52             | 524.24              | 0.163                            | 975.14              | 158.73              |
| A_68_P25098820 | chr7:53652793-53652837                            | NM_001112739:948    | Kcnc1      | INSIDE                 | 0.493                                           | 0.725                            | 2334.88             | 1692.51             | 0.357                            | 1771.71             | 633.10              |
| A_68_P27453320 | chr10:111709075-111709123                         | NM_001025581:920    | Kcnc2      | INSIDE                 | 0.592                                           | 0.552                            | 990.86              | 547.40              | 0.327                            | 709.97              | 232.23              |
| A_68_P25088287 | chr7:51847145-51847189                            | NM_008422:911       | Kcnc3      | INSIDE                 | 0.423                                           | 0.462                            | 2111.75             | 976.07              | 0.195                            | 1448.34             | 282.91              |
| A_68_P24284102 | chr6:21164876-21164920                            | NM_019697:-1210     | Kcnd2      | PROMOTER               | 0.554                                           | 0.595                            | 1729.34             | 1028.65             | 0.329                            | 1273.09             | 419.27              |
| A_68_P24284108 | chr6:21165672-21165716                            | NM_019697:-414      | Kcnd2      | PROMOTER               | 0.246                                           | 0.424                            | 1480.99             | 627.38              | 0.104                            | 1327.55             | 138.59              |
| A_68_P28269095 | chr12:17182821-17182865                           | NM_201531:852       | Kcnf1      | INSIDE                 | 0.450                                           | 0.449                            | 1330.17             | 597.50              | 0.202                            | 1061.87             | 214.59              |
| A_68_P28269097 | chr12:17183053-17183097                           | NM_201531:620       | Kcnf1      | INSIDE                 | 0.536                                           | 0.706                            | 1723.04             | 1217.03             | 0.378                            | 1194.79             | 452.14              |
| A_68_P28269098 | chr12:17183229-17183273                           | NM_201531:444       | Kcnf1      | INSIDE                 | 0.188                                           | 0.579                            | 2611.73             | 1511.42             | 0.109                            | 1961.17             | 213.40              |
| A_68_P28269099 | chr12:17183377-17183426                           | NM_201531:293       | Kcnf1      | INSIDE                 | 0.263                                           | 0.449                            | 1423.46             | 639.55              | 0.118                            | 1023.25             | 121.10              |
| A_68_P21840415 | chr2:168094408-168094454                          | NM_001081134:401    | Kcng1      | INSIDE                 | 0.590                                           | 4.346                            | 2995.93             | 13019.33            | 2.564                            | 1963.66             | 5034.52             |
| A_68_P31863850 | chr18:80559762-80559806                           | NM_001190373:1209   | Kcng2      | INSIDE                 | 0.349                                           | 0.545                            | 2077.46             | 1131.85             | 0.190                            | 1568.32             | 297.86              |
| A_68_P31400025 | chr17:84030569-84030613                           | NM_153512:645       | Kcng3      | INSIDE                 | 0.353                                           | 1.389                            | 2456.92             | 3413.51             | 0.491                            | 1758.85             | 863.10              |
| A_68_P26215168 | chr8:122157059-122157103                          | NM_025734:2500      | Kcng4      | INSIDE                 | 0.651                                           | 2.357                            | 818.18              | 1928.32             | 1.534                            | 766.81              | 1176.59             |
| A_68_P23541182 | chr5:23857019-23857063                            | NM_013569:382       | Kenh2      | INSIDE                 | 0.408                                           | 0.563                            | 1148.64             | 647.18              | 0.230                            | 931.66              | 214.28              |
| A_68_P30478813 | chr15:99054103-99054147                           | NM_010601:-1282     | Kenh3      | PROMOTER               | 0.286                                           | 0.493                            | 1168.71             | 575.72              | 0.141                            | 913.16              | 128.58              |
| A_68_P28069993 | chr11:100620866-100620910                         | NM_001081194:204    | Kenh4      | INSIDE                 | 0.263                                           | 0.627                            | 1564.29             | 980.36              | 0.165                            | 1237.72             | 203.74              |
| A_68_P28547080 | chr12:76277679-76277723                           | NM_172805:619       | Kenh5      | INSIDE                 | 0.280                                           | 0.403                            | 1318.92             | 531.28              | 0.113                            | 1070.99             | 120.62              |
| A_68_P28099138 | chr11:105881660-105881704                         | NM_001037712:12166  | Kenh6      | INSIDE                 | 0.269                                           | 0.698                            | 3544.63             | 2474.23             | 0.188                            | 2626.04             | 493.34              |
| A_68_P27696175 | chr11:33580643-33580689                           | NM_001190885:162919 | Kcnip1     | INSIDE                 | 0.495                                           | 0.672                            | 1483.55             | 996.39              | 0.333                            | 1260.53             | 419.36              |
| A_68_P21613745 | chr2:127307805-127307849                          | NM_001111331:409    | Kcnip3     | INSIDE                 | 0.650                                           | 0.441                            | 2650.19             | 1168.26             | 0.287                            | 2148.46             | 615.97              |
| A_68_P20832488 | chr1:174271323-174271367                          | NM_001039484:4      | Kcnj10     | INSIDE                 | 0.335                                           | 0.681                            | 2205.64             | 1501.20             | 0.228                            | 1514.61             | 345.65              |
| A_68_P21233127 | chr2:55289729-55289773                            | NM_008426:184       | Kcnj3      | INSIDE                 | 0.364                                           | 0.622                            | 1796.23             | 1116.79             | 0.226                            | 1390.13             | 314.43              |
| A_68_P21233128 | chr2:55289837-55289883                            | NM_008426:294       | Kcnj3      | INSIDE                 | 0.358                                           | 0.376                            | 1784.59             | 671.01              | 0.135                            | 1342.96             | 180.69              |
| A_68_P30366727 | chr15:79316080-79316124                           | NM_008427:19569     | Kcnj4      | INSIDE                 | 0.653                                           | 2.056                            | 3781.89             | 7776.96             | 1.343                            | 2686.58             | 3607.71             |
| A_68_P30366869 | chr15:79335593-79335637                           | NM_008427:57        | Kcnj4      | INSIDE                 | 0.231                                           | 0.476                            | 1403.09             | 668.18              | 0.110                            | 1117.27             | 122.75              |
| A_68_P30366871 | chr15:79335939-79335983                           | NM_008427:-289      | Kcnj4      | PROMOTER               | 0.314                                           | 0.643                            | 1312.02             | 843.23              | 0.202                            | 1044.58             | 210.62              |
| A_68_P24905346 | chr6:142519942-142519986                          | NM_008428:-88       | Kcnj8      | PROMOTER               | 0.453                                           | 0.725                            | 1854.73             | 1345.34             | 0.328                            | 1478.94             | 485.44              |
| A_68_P20832394 | chr1:174256462-174256506                          | NM_008429:2910      | Kcnj9      | INSIDE                 | 0.471                                           | 0.702                            | 1531.96             | 1075.27             | 0.330                            | 1106.62             | 365.65              |
| A_68_P20832395 | chr1:174256553-174256597                          | NM_008429:2820      | Kcnj9      | INSIDE                 | 0.417                                           | 0.587                            | 2183.54             | 1282.71             | 0.245                            | 1782.70             | 436.35              |
| A_68_P28670942 | chr12:99812802-99812846                           | NM_029911:3326      | Kcnk10     | INSIDE                 | 0.234                                           | 0.699                            | 4832.58             | 3376.41             | 0.163                            | 3451.33             | 563.71              |
| A_68_P31425154 | chr17:88197235-88197279                           | NM_199251:78        | Kcnk12     | INSIDE                 | 0.551                                           | 0.642                            | 1855.73             | 1190.91             | 0.354                            | 1480.17             | 523.58              |
| A_68_P31425157 | chr17:88197480-88197524                           | NM_199251:-168      | Kcnk12     | PROMOTER               | 0.403                                           | 0.466                            | 4375.97             | 2037.15             | 0.188                            | 3471.60             | 651.98              |
| A_68_P31425158 | chr17:88197562-88197606                           | NM_199251:-250      | Kcnk12     | PROMOTER               | 0.374                                           | 0.571                            | 1224.58             | 699.32              | 0.214                            | 882.97              | 188.56              |
| A_68_P28679266 | chr12:101203176-101203220                         | NM_001164426:490    | Kcnk13     | INSIDE                 | 0.224                                           | 0.548                            | 1392.85             | 763.65              | 0.123                            | 1007.56             | 123.49              |
| A_68_P28679268 | chr12:101203451-101203495                         | NM_001164426:764    | Kcnk13     | INSIDE                 | 0.442                                           | 0.736                            | 2083.21             | 1532.32             | 0.325                            | 1587.95             | 516.39              |
| A_68_P21814760 | chr2:163679507-163679551                          | NM_001030292:43     | Kcnk15     | INSIDE                 | 0.581                                           | 0.683                            | 1483.07             | 1013.04             | 0.397                            | 1168.80             | 463.49              |
| A_68_P23573357 | chr5:30891361-30891405                            | NM_010608:840       | Kcnk3      | INSIDE                 | 0.502                                           | 0.581                            | 1413.66             | 821.28              | 0.292                            | 1082.69             | 315.65              |
| A_68_P23573586 | chr5:30924517-30924565                            | NM_010608:33998     | Kcnk3      | INSIDE                 | 0.421                                           | 0.568                            | 1124.37             | 638.72              | 0.239                            | 915.88              | 219.27              |
| A_68_P31936766 | chr19:7008439-7008483                             | NM_008431:545       | Kcnk4      | INSIDE                 | 0.349                                           | 0.559                            | 2029.56             | 1134.32             | 0.195                            | 1337.02             | 261.08              |
| A_68_P31936768 | chr19:7008741-7008785                             | NM_008431:243       | Kcnk4      | INSIDE                 | 0.347                                           | 0.494                            | 1948.28             | 962.37              | 0.172                            | 1503.30             | 257.84              |



| ProbeName      | Target position of probe on CpG island microarray | TargetID           | GeneSymbol | CpG island Description | Ratio of relative methylation (TiO2-NP/Vehicle) | Sham group                       |                     |                     | TiO <sub>2</sub> -H group        |                     |                     |
|----------------|---------------------------------------------------|--------------------|------------|------------------------|-------------------------------------------------|----------------------------------|---------------------|---------------------|----------------------------------|---------------------|---------------------|
|                |                                                   |                    |            |                        |                                                 | Relative methylation (Cy-5/Cy-3) | Cy-3 signal (Input) | Cy-5 signal (MeDIP) | Relative methylation (Cy-5/Cy-3) | Cy-3 signal (Input) | Cy-5 signal (MeDIP) |
| A_68_P29445595 | chr14:21000753-21000797                           | NM_021542:230      | Kenk5      | INSIDE                 | 0.388                                           | 0.502                            | 1115.45             | 560.30              | 0.195                            | 1023.65             | 199.39              |
| A_68_P30325017 | chr15:72376544-72376592                           | NM_001033876:141   | Kenk9      | INSIDE                 | 0.299                                           | 0.552                            | 1254.57             | 692.97              | 0.165                            | 989.60              | 163.53              |
| A_68_P29469008 | chr14:24823022-24823066                           | NM_010610:383      | Kenma1     | INSIDE                 | 0.301                                           | 0.601                            | 2823.74             | 1698.02             | 0.181                            | 1847.96             | 333.96              |
| A_68_P31672396 | chr18:45718914-45718958                           | NM_080465:-871     | Kcnn2      | PROMOTER               | 0.284                                           | 0.728                            | 2275.19             | 1655.82             | 0.207                            | 1551.17             | 320.94              |
| A_68_P31672403 | chr18:45719784-45719828                           | NM_080465:-1       | Kcnn2      | PROMOTER               | 0.122                                           | 0.682                            | 3612.23             | 2463.14             | 0.083                            | 2621.15             | 217.18              |
| A_68_P25598743 | chr7:150293354-150293398                          | NM_008434:218      | Kcnq1      | INSIDE                 | 0.596                                           | 0.717                            | 1531.70             | 1098.05             | 0.427                            | 1262.71             | 539.38              |
| A_68_P25599905 | chr7:150482316-150482360                          | NR_001461:114      | Kcnq1ot1   | INSIDE                 | 0.517                                           | 1.366                            | 7091.04             | 9685.35             | 0.707                            | 4961.85             | 3505.79             |
| A_68_P30290896 | chr15:66117380-66117424                           | NM_152923:384      | Kcnq3      | INSIDE                 | 0.333                                           | 0.417                            | 2616.11             | 1091.34             | 0.139                            | 1995.45             | 277.20              |
| A_68_P30290897 | chr15:66117445-66117492                           | NM_152923:318      | Kcnq3      | INSIDE                 | 0.162                                           | 0.628                            | 1729.08             | 1085.51             | 0.102                            | 1184.62             | 120.64              |
| A_68_P23252660 | chr4:120370742-120370786                          | NM_001081142:49017 | Kcnq4      | INSIDE                 | 0.656                                           | 3.128                            | 4023.88             | 12586.34            | 2.052                            | 2870.52             | 5890.80             |
| A_68_P23252895 | chr4:120403760-120403804                          | NM_001081142:15999 | Kcnq4      | INSIDE                 | 0.441                                           | 0.574                            | 2018.15             | 1158.73             | 0.253                            | 1578.47             | 399.81              |
| A_68_P23252897 | chr4:120404005-120404049                          | NM_001081142:15755 | Kcnq4      | INSIDE                 | 0.197                                           | 0.550                            | 1613.43             | 886.66              | 0.108                            | 1095.09             | 118.31              |
| A_68_P23253009 | chr4:120419330-120419374                          | NM_001081142:429   | Kcnq4      | INSIDE                 | 0.424                                           | 0.701                            | 1634.38             | 1145.29             | 0.297                            | 1213.62             | 360.38              |
| A_68_P21816596 | chr2:163993800-163993844                          | NM_008435:3027     | Kcns1      | INSIDE                 | 0.496                                           | 0.552                            | 1509.46             | 833.12              | 0.274                            | 1233.01             | 337.56              |
| A_68_P30130467 | chr15:34767012-34767056                           | NM_181317:-101     | Kcns2      | PROMOTER               | 0.595                                           | 0.588                            | 992.19              | 583.30              | 0.350                            | 860.67              | 301.10              |
| A_68_P30130468 | chr15:34767120-34767164                           | NM_181317:7        | Kcns2      | INSIDE                 | 0.183                                           | 0.442                            | 1909.65             | 844.39              | 0.081                            | 1400.70             | 113.65              |
| A_68_P24326992 | chr6:29457810-29457854                            | NM_001029985:120   | Kcp        | INSIDE                 | 0.438                                           | 0.734                            | 2819.38             | 2068.58             | 0.321                            | 2183.45             | 700.91              |
| A_68_P31515592 | chr18:15223215-15223266                           | NM_001142731:-1149 | Kctd1      | PROMOTER               | 0.105                                           | 0.588                            | 2969.77             | 1746.58             | 0.061                            | 1962.40             | 120.61              |
| A_68_P31515593 | chr18:15223323-15223369                           | NM_001142731:-1255 | Kctd1      | PROMOTER               | 0.115                                           | 0.542                            | 2658.26             | 1440.09             | 0.062                            | 1974.93             | 123.08              |
| A_68_P31516117 | chr18:15308896-15308940                           | NM_134112:1037     | Kctd1      | INSIDE                 | 0.453                                           | 0.679                            | 1313.21             | 891.68              | 0.307                            | 1025.35             | 315.20              |
| A_68_P31516119 | chr18:15309151-15309195                           | NM_134112:783      | Kctd1      | INSIDE                 | 0.253                                           | 0.525                            | 1732.70             | 909.46              | 0.133                            | 1339.55             | 178.14              |
| A_68_P31516120 | chr18:15309236-15309280                           | NM_134112:697      | Kctd1      | INSIDE                 | 0.204                                           | 0.585                            | 2412.99             | 1412.22             | 0.120                            | 1891.21             | 226.24              |
| A_68_P31516121 | chr18:15309314-15309358                           | NM_134112:619      | Kctd1      | INSIDE                 | 0.444                                           | 0.498                            | 1951.11             | 971.09              | 0.221                            | 1433.41             | 316.92              |
| A_68_P24003591 | chr5:114830465-114830509                          | NM_001159941:28    | Kctd10     | INSIDE                 | 0.594                                           | 0.449                            | 1952.45             | 876.19              | 0.267                            | 1600.68             | 426.94              |
| A_68_P29863081 | chr14:103380685-103380729                         | NM_177715:1148     | Kctd12     | INSIDE                 | 0.082                                           | 0.624                            | 3074.56             | 1918.04             | 0.051                            | 2306.57             | 117.81              |
| A_68_P25503046 | chr7:134072788-134072832                          | NM_172747:418      | Kctd13     | INSIDE                 | 0.608                                           | 0.679                            | 1493.07             | 1014.50             | 0.413                            | 1249.56             | 516.54              |
| A_68_P25044855 | chr7:35438249-35438293                            | NM_146188:-410     | Kctd15     | PROMOTER               | 0.526                                           | 0.476                            | 1339.92             | 638.08              | 0.250                            | 1162.42             | 291.04              |
| A_68_P25044856 | chr7:35438432-35438491                            | NM_146188:-601     | Kctd15     | PROMOTER               | 0.121                                           | 0.663                            | 1966.91             | 1303.13             | 0.080                            | 1459.30             | 116.61              |
| A_68_P25044857 | chr7:35438615-35438659                            | NM_146188:-776     | Kctd15     | PROMOTER               | 0.228                                           | 0.466                            | 3075.38             | 1431.70             | 0.106                            | 2089.06             | 221.55              |
| A_68_P20256314 | chr1:58026706-58026750                            | NR_027630:-360     | Kctd18     | PROMOTER               | 0.262                                           | 0.497                            | 1256.59             | 623.96              | 0.130                            | 934.48              | 121.78              |
| A_68_P25349935 | chr7:104480504-104480548                          | NM_001039039:-306  | Kctd21     | DIVERGENT_PROMOTER     | 0.289                                           | 0.299                            | 1729.33             | 516.53              | 0.086                            | 1377.68             | 118.82              |
| A_68_P31095211 | chr17:24210441-24210485                           | NM_027008:-10      | Kctd5      | PROMOTER               | 0.551                                           | 0.582                            | 2467.49             | 1437.18             | 0.321                            | 1824.41             | 585.38              |
| A_68_P26520288 | chr9:53192430-53192474                            | NM_212445:325      | Kdele2     | INSIDE                 | 0.638                                           | 0.632                            | 1068.40             | 675.49              | 0.404                            | 857.41              | 346.03              |
| A_68_P24156414 | chr5:144165340-144165384                          | NM_025841:-136     | Kdele2     | PROMOTER               | 0.262                                           | 0.411                            | 1449.80             | 595.41              | 0.108                            | 1136.90             | 122.23              |
| A_68_P30366911 | chr15:79342352-79342396                           | NM_134090:-4463    | Kdele3     | DIVERGENT_PROMOTER     | 0.264                                           | 0.657                            | 3541.10             | 2327.67             | 0.173                            | 2854.17             | 494.60              |
| A_68_P30366913 | chr15:79342515-79342567                           | NM_134090:-4297    | Kdele3     | DIVERGENT_PROMOTER     | 0.259                                           | 0.605                            | 1135.05             | 686.84              | 0.157                            | 791.57              | 124.14              |
| A_68_P23334804 | chr4:136157993-136158037                          | NM_133872:624      | Kdm1a      | INSIDE                 | 0.081                                           | 0.574                            | 4248.67             | 2438.37             | 0.047                            | 3328.66             | 155.49              |
| A_68_P24053342 | chr5:123439126-123439170                          | NM_001003953:-47   | Kdm2b      | PROMOTER               | 0.350                                           | 0.595                            | 2810.70             | 1672.41             | 0.208                            | 1999.93             | 416.43              |
| A_68_P24537469 | chr6:71583121-71583165                            | NM_001038695:-243  | Kdm3a      | PROMOTER               | 0.077                                           | 1.350                            | 4220.43             | 5698.05             | 0.104                            | 2899.62             | 300.82              |
| A_68_P24537471 | chr6:71583335-71583379                            | NM_001038695:-457  | Kdm3a      | PROMOTER               | 0.243                                           | 0.635                            | 2180.31             | 1384.48             | 0.154                            | 1665.30             | 257.21              |
| A_68_P23019857 | chr4:73898113-73898157                            | NM_144787:352      | Kdm4c      | INSIDE                 | 0.187                                           | 0.580                            | 1672.21             | 970.40              | 0.109                            | 1586.42             | 172.49              |
| A_68_P26317489 | chr9:14304655-14304699                            | NM_173433:250      | Kdm4d      | INSIDE                 | 0.177                                           | 0.575                            | 2013.19             | 1156.58             | 0.101                            | 1392.24             | 141.29              |
| A_68_P24798110 | chr6:120313882-120313931                          | NM_145997:-210     | Kdm5a      | DIVERGENT_PROMOTER     | 0.256                                           | 0.411                            | 1599.14             | 656.93              | 0.105                            | 1153.34             | 121.36              |
| A_68_P20634005 | chr1:136453383-136453427                          | NM_152895:-3350    | Kdm5b      | DIVERGENT_PROMOTER     | 0.483                                           | 0.595                            | 1761.01             | 1048.22             | 0.287                            | 1387.93             | 398.75              |

| ProbeName      | Target position of probe on CpG island microarray | TargetID           | GeneSymbol | CpG island Description | Ratio of relative methylation (TiO2-NP/Vehicle) | Sham group                       |                     |                     | TiO <sub>2</sub> -H group        |                     |                     |
|----------------|---------------------------------------------------|--------------------|------------|------------------------|-------------------------------------------------|----------------------------------|---------------------|---------------------|----------------------------------|---------------------|---------------------|
|                |                                                   |                    |            |                        |                                                 | Relative methylation (Cy-5/Cy-3) | Cy-3 signal (Input) | Cy-5 signal (MeDIP) | Relative methylation (Cy-5/Cy-3) | Cy-3 signal (Input) | Cy-5 signal (MeDIP) |
| A_68_P32281779 | chrX:17739627-17739671                            | NM_009483:-144     | Kdm6a      | PROMOTER               | 0.659                                           | 0.414                            | 2101.22             | 869.94              | 0.273                            | 751.51              | 205.12              |
| A_68_P27894946 | chr11:69224331-69224375                           | NM_001017426:2825  | Kdm6b      | INSIDE                 | 0.294                                           | 1.983                            | 6938.02             | 13758.22            | 0.582                            | 4494.01             | 2616.74             |
| A_68_P27894955 | chr11:69225357-69225401                           | NM_001017426:1799  | Kdm6b      | INSIDE                 | 0.209                                           | 0.460                            | 1724.87             | 792.89              | 0.096                            | 1266.95             | 121.57              |
| A_68_P20510205 | chr1:108656151-108656195                          | NM_027534:147      | Kdsr       | INSIDE                 | 0.532                                           | 0.685                            | 1556.75             | 1066.07             | 0.364                            | 1233.63             | 449.37              |
| A_68_P20510206 | chr1:108656242-108656286                          | NM_027534:55       | Kdsr       | INSIDE                 | 0.537                                           | 0.574                            | 2879.18             | 1652.62             | 0.308                            | 2172.45             | 670.18              |
| A_68_P23298314 | chr4:129418594-129418638                          | NM_011317:910      | Khdrbs1    | INSIDE                 | 0.519                                           | 0.525                            | 1377.45             | 723.44              | 0.273                            | 1242.32             | 338.57              |
| A_68_P23298316 | chr4:129418783-129418827                          | NM_011317:722      | Khdrbs1    | INSIDE                 | 0.247                                           | 0.445                            | 1345.62             | 599.40              | 0.110                            | 1156.77             | 127.12              |
| A_68_P23298318 | chr4:129419063-129419107                          | NM_011317:442      | Khdrbs1    | INSIDE                 | 0.195                                           | 0.411                            | 1817.20             | 746.82              | 0.080                            | 1428.52             | 114.25              |
| A_68_P23298327 | chr4:129420133-129420178                          | NM_011317:-629     | Khdrbs1    | PROMOTER               | 0.077                                           | 1.406                            | 1879.44             | 2643.30             | 0.109                            | 1298.73             | 141.46              |
| A_68_P31259697 | chr17:57171063-571711108                          | NM_010613:-155     | Khsrp      | PROMOTER               | 0.529                                           | 0.585                            | 1395.41             | 816.58              | 0.310                            | 1094.26             | 338.73              |
| A_68_P31259698 | chr17:57171184-57171228                           | NM_010613:-276     | Khsrp      | PROMOTER               | 0.093                                           | 0.563                            | 3531.04             | 1987.89             | 0.052                            | 2623.12             | 136.68              |
| A_68_P28292712 | chr12:25659767-25659811                           | NM_001081378:-8    | Kidins220  | PROMOTER               | 0.353                                           | 0.596                            | 1392.40             | 829.48              | 0.211                            | 1030.84             | 217.06              |
| A_68_P32095250 | chr19:37450569-37450613                           | NM_010615:-302     | Kif11      | PROMOTER               | 0.662                                           | 0.600                            | 936.98              | 561.73              | 0.397                            | 721.13              | 286.01              |
| A_68_P32095251 | chr19:37450692-37450736                           | NM_010615:-178     | Kif11      | PROMOTER               | 0.184                                           | 0.513                            | 3322.40             | 1705.44             | 0.095                            | 2397.48             | 226.61              |
| A_68_P29010701 | chr13:47026038-47026093                           | NM_010617:-978     | Kif13a     | PROMOTER               | 0.405                                           | 0.484                            | 1767.47             | 854.99              | 0.196                            | 1333.63             | 261.42              |
| A_68_P29668829 | chr14:65271192-65271238                           | NM_001081177:-153  | Kif13b     | PROMOTER               | 0.160                                           | 0.493                            | 1794.03             | 885.17              | 0.079                            | 1495.33             | 118.26              |
| A_68_P29668831 | chr14:65271409-65271453                           | NM_001081177:63    | Kif13b     | INSIDE                 | 0.311                                           | 0.676                            | 1231.23             | 832.23              | 0.210                            | 936.30              | 196.54              |
| A_68_P29668832 | chr14:65271520-65271564                           | NM_001081177:175   | Kif13b     | INSIDE                 | 0.363                                           | 0.514                            | 2830.97             | 1454.50             | 0.186                            | 2398.24             | 447.04              |
| A_68_P20646087 | chr1:138362972-138363016                          | NM_001081258:-1540 | Kif14      | PROMOTER               | 0.586                                           | 0.509                            | 1568.30             | 797.99              | 0.298                            | 1246.87             | 371.71              |
| A_68_P28082319 | chr11:102786133-102786177                         | NM_197959:284      | Kif18b     | INSIDE                 | 0.100                                           | 0.605                            | 4265.79             | 2579.55             | 0.061                            | 2768.17             | 168.18              |
| A_68_P28149601 | chr11:114626740-114626784                         | NM_001102615:60    | Kif19a     | INSIDE                 | 0.222                                           | 0.615                            | 3182.32             | 1958.20             | 0.137                            | 2326.78             | 318.00              |
| A_68_P20453277 | chr1:94998219-94998263                            | NM_001110315:202   | Kif1a      | INSIDE                 | 0.170                                           | 0.622                            | 1535.58             | 955.02              | 0.106                            | 1147.99             | 121.25              |
| A_68_P20453278 | chr1:94998327-94998371                            | NM_001110315:94    | Kif1a      | INSIDE                 | 0.293                                           | 0.550                            | 2648.99             | 1458.18             | 0.161                            | 1809.39             | 291.67              |
| A_68_P20453279 | chr1:94998401-94998445                            | NM_001110315:20    | Kif1a      | INSIDE                 | 0.571                                           | 0.610                            | 1585.84             | 967.91              | 0.348                            | 1191.72             | 414.97              |
| A_68_P23399813 | chr4:148681750-148681794                          | NM_207682:35       | Kif1b      | INSIDE                 | 0.396                                           | 0.601                            | 2997.35             | 1800.31             | 0.238                            | 2346.60             | 557.57              |
| A_68_P23399815 | chr4:148682002-148682046                          | NM_207682:-217     | Kif1b      | PROMOTER               | 0.272                                           | 0.665                            | 4528.99             | 3012.98             | 0.181                            | 3547.92             | 641.81              |
| A_68_P31613845 | chr18:34784223-34784267                           | NM_001166407:-33   | Kif20a     | PROMOTER               | 0.516                                           | 0.651                            | 951.15              | 619.24              | 0.336                            | 714.48              | 239.96              |
| A_68_P32082884 | chr19:34996996-34997040                           | NM_183046:171      | Kif20b     | INSIDE                 | 0.575                                           | 0.534                            | 1524.39             | 813.30              | 0.307                            | 1149.54             | 352.94              |
| A_68_P30433465 | chr15:90879520-90879574                           | NM_001109040:833   | Kif21a     | INSIDE                 | 0.301                                           | 0.443                            | 1163.02             | 514.88              | 0.133                            | 904.58              | 120.45              |
| A_68_P30433474 | chr15:90880547-90880591                           | NM_001109040:-189  | Kif21a     | PROMOTER               | 0.662                                           | 0.603                            | 1332.70             | 803.69              | 0.399                            | 1122.47             | 448.16              |
| A_68_P20644037 | chr1:138028308-138028352                          | NM_001039472:353   | Kif21b     | INSIDE                 | 0.340                                           | 0.522                            | 1919.86             | 1001.71             | 0.177                            | 1596.07             | 282.84              |
| A_68_P20644038 | chr1:138028419-138028463                          | NM_001039472:463   | Kif21b     | INSIDE                 | 0.543                                           | 0.566                            | 1200.58             | 679.11              | 0.307                            | 1107.51             | 340.33              |
| A_68_P25503740 | chr7:134185787-134185831                          | NM_145588:126      | Kif22      | INSIDE                 | 0.305                                           | 0.638                            | 1173.06             | 748.72              | 0.195                            | 861.63              | 167.91              |
| A_68_P26567939 | chr9:61794038-61794082                            | NM_024245:546      | Kif23      | INSIDE                 | 0.572                                           | 0.692                            | 1333.40             | 922.34              | 0.395                            | 1143.33             | 452.02              |
| A_68_P26567942 | chr9:61794410-61794454                            | NM_024245:174      | Kif23      | INSIDE                 | 0.645                                           | 0.691                            | 1252.07             | 865.46              | 0.446                            | 1080.95             | 482.19              |
| A_68_P28748127 | chr12:113382080-113382124                         | NM_001097621:-2316 | Kif26a     | PROMOTER               | 0.450                                           | 0.280                            | 1974.31             | 553.61              | 0.126                            | 1580.17             | 199.56              |
| A_68_P28748134 | chr12:113382997-113383048                         | NM_001097621:-1396 | Kif26a     | PROMOTER               | 0.424                                           | 4.501                            | 10309.02            | 46396.48            | 1.909                            | 6069.03             | 11587.23            |
| A_68_P28748138 | chr12:113383612-113383656                         | NM_001097621:-784  | Kif26a     | PROMOTER               | 0.271                                           | 0.570                            | 1017.07             | 579.61              | 0.154                            | 743.14              | 114.67              |
| A_68_P28748139 | chr12:113383755-113383799                         | NM_001097621:-642  | Kif26a     | PROMOTER               | 0.274                                           | 0.645                            | 1160.96             | 749.22              | 0.177                            | 791.19              | 140.04              |
| A_68_P20864285 | chr1:180457620-180457665                          | NM_001161665:-1613 | Kif26b     | PROMOTER               | 0.211                                           | 0.685                            | 1043.38             | 714.81              | 0.145                            | 828.04              | 119.70              |
| A_68_P20864287 | chr1:180457911-180457955                          | NM_001161665:-1323 | Kif26b     | PROMOTER               | 0.164                                           | 0.495                            | 2357.97             | 1166.98             | 0.081                            | 1885.46             | 153.30              |
| A_68_P20864288 | chr1:180458040-180458084                          | NM_001161665:-1193 | Kif26b     | PROMOTER               | 0.197                                           | 0.677                            | 1096.79             | 742.44              | 0.133                            | 880.68              | 117.44              |
| A_68_P20864291 | chr1:180458344-180458388                          | NM_001161665:-889  | Kif26b     | PROMOTER               | 0.305                                           | 0.559                            | 3546.14             | 1982.41             | 0.171                            | 2609.64             | 445.47              |
| A_68_P20864292 | chr1:180458491-180458535                          | NM_001161665:-743  | Kif26b     | PROMOTER               | 0.182                                           | 0.614                            | 1523.68             | 935.46              | 0.112                            | 1084.76             | 121.40              |

| ProbeName      | Target position of probe on CpG island microarray | TargetID           | GeneSymbol | CpG island Description | Ratio of relative methylation (TiO2-NP/Vehicle) | Sham group                       |                     |                     | TiO <sub>2</sub> -H group        |                     |                     |
|----------------|---------------------------------------------------|--------------------|------------|------------------------|-------------------------------------------------|----------------------------------|---------------------|---------------------|----------------------------------|---------------------|---------------------|
|                |                                                   |                    |            |                        |                                                 | Relative methylation (Cy-5/Cy-3) | Cy-3 signal (Input) | Cy-5 signal (MeDIP) | Relative methylation (Cy-5/Cy-3) | Cy-3 signal (Input) | Cy-5 signal (MeDIP) |
| A_68_P20864294 | chr1:180458639-180458683                          | NM_001161665:-595  | Kif26b     | PROMOTER               | 0.133                                           | 0.590                            | 1901.92             | 1121.91             | 0.079                            | 1535.15             | 120.81              |
| A_68_P20864304 | chr1:180459747-180459791                          | NM_001161665:513   | Kif26b     | INSIDE                 | 0.308                                           | 0.641                            | 2569.97             | 1646.84             | 0.197                            | 1831.57             | 361.10              |
| A_68_P29072860 | chr13:58460543-58460587                           | NM_175214:-4341    | Kif27      | PROMOTER               | 0.351                                           | 0.430                            | 4159.44             | 1787.57             | 0.151                            | 3206.66             | 484.26              |
| A_68_P27805436 | chr11:53381255-53381299                           | NM_008443:396      | Kif3a      | INSIDE                 | 0.576                                           | 0.531                            | 1519.41             | 806.94              | 0.306                            | 1138.73             | 348.14              |
| A_68_P32560534 | chrX:97821357-97821401                            | NM_008446:-25      | Kif4       | DIVERGENT_PROMOTER     | 0.259                                           | 1.624                            | 1122.58             | 1823.48             | 0.422                            | 487.74              | 205.59              |
| A_68_P32560535 | chrX:97821487-97821531                            | NM_008446:105      | Kif4       | INSIDE                 | 0.118                                           | 2.407                            | 3312.54             | 7972.91             | 0.283                            | 1261.11             | 356.94              |
| A_68_P27534777 | chr10:126676555-126676599                         | NM_001039000:23843 | Kif5a      | INSIDE                 | 0.381                                           | 1.451                            | 909.64              | 1320.23             | 0.554                            | 735.03              | 406.86              |
| A_68_P27534886 | chr10:126699975-126700019                         | NM_001039000:423   | Kif5a      | INSIDE                 | 0.264                                           | 0.532                            | 1181.40             | 628.45              | 0.140                            | 850.79              | 119.49              |
| A_68_P27534887 | chr10:126700073-126700117                         | NM_001039000:325   | Kif5a      | INSIDE                 | 0.322                                           | 0.635                            | 3511.08             | 2229.25             | 0.205                            | 2525.28             | 516.91              |
| A_68_P21203200 | chr2:49474749-49474793                            | NM_008449:-63      | Kif5c      | PROMOTER               | 0.626                                           | 0.582                            | 1030.88             | 599.73              | 0.364                            | 858.34              | 312.44              |
| A_68_P31113145 | chr17:27054067-27054111                           | NM_053173:53       | Kif5b      | INSIDE                 | 0.638                                           | 0.565                            | 1547.45             | 873.86              | 0.360                            | 1163.83             | 419.41              |
| A_68_P27279732 | chr10:79383697-79383741                           | NM_053244:4003     | Kiss1r     | INSIDE                 | 0.504                                           | 0.690                            | 2161.99             | 1492.60             | 0.348                            | 1683.69             | 586.03              |
| A_68_P27279736 | chr10:79384102-79384146                           | NM_053244:4409     | Kiss1r     | INSIDE                 | 0.106                                           | 0.654                            | 2489.30             | 1627.83             | 0.069                            | 1728.67             | 119.93              |
| A_68_P27279737 | chr10:79384185-79384238                           | NM_053244:4496     | Kiss1r     | INSIDE                 | 0.177                                           | 1.533                            | 1071.29             | 1642.47             | 0.272                            | 799.13              | 217.16              |
| A_68_P27279739 | chr10:79384461-79384505                           | NM_053244:4767     | Kiss1r     | INSIDE                 | 0.629                                           | 0.411                            | 1414.74             | 581.63              | 0.259                            | 1146.57             | 296.50              |
| A_68_P27390318 | chr10:99478125-99478169                           | NM_013598:-311     | Kifl       | PROMOTER               | 0.623                                           | 0.632                            | 1060.59             | 670.45              | 0.394                            | 856.22              | 336.99              |
| A_68_P27390319 | chr10:99478265-99478309                           | NM_013598:-171     | Kifl       | PROMOTER               | 0.419                                           | 0.515                            | 1992.06             | 1025.00             | 0.215                            | 1728.00             | 372.28              |
| A_68_P24193751 | chr5:151755711-151755755                          | NM_013823:551      | Klf1       | INSIDE                 | 0.544                                           | 0.537                            | 1002.19             | 538.11              | 0.292                            | 947.84              | 276.69              |
| A_68_P31927054 | chr19:5117908-5117952                             | NM_008451:478      | Klf2       | INSIDE                 | 0.584                                           | 0.569                            | 1030.60             | 585.96              | 0.332                            | 772.93              | 256.46              |
| A_68_P24993121 | chr7:19989091-19989135                            | NM_146182:-3907    | Klf2       | DIVERGENT_PROMOTER     | 0.594                                           | 0.435                            | 1409.77             | 612.81              | 0.258                            | 1126.58             | 291.00              |
| A_68_P28290821 | chr12:25335787-25335837                           | NM_178357:-423     | Klf11      | PROMOTER               | 0.389                                           | 0.533                            | 1034.45             | 551.52              | 0.207                            | 785.97              | 162.93              |
| A_68_P28290830 | chr12:25336784-25336828                           | NM_178357:571      | Klf11      | INSIDE                 | 0.235                                           | 1.611                            | 1105.43             | 1781.36             | 0.379                            | 863.67              | 326.94              |
| A_68_P25174079 | chr7:71036675-71036719                            | NM_021366:47105    | Klf13      | INSIDE                 | 0.627                                           | 2.450                            | 789.09              | 1933.59             | 1.537                            | 659.13              | 1013.13             |
| A_68_P25174410 | chr7:71084241-71084285                            | NM_021366:-461     | Klf13      | PROMOTER               | 0.198                                           | 0.491                            | 1760.19             | 863.53              | 0.097                            | 1213.78             | 117.72              |
| A_68_P24334773 | chr6:30907971-30908017                            | NM_001135093:996   | Klf14      | INSIDE                 | 0.291                                           | 0.529                            | 1220.51             | 645.44              | 0.154                            | 916.79              | 140.84              |
| A_68_P24632567 | chr6:90413191-90413235                            | NM_023184:593      | Klf15      | INSIDE                 | 0.240                                           | 0.525                            | 2516.21             | 1320.70             | 0.126                            | 1879.15             | 237.05              |
| A_68_P27284095 | chr10:80039472-80039516                           | NM_078477:547      | Klf16      | INSIDE                 | 0.247                                           | 0.599                            | 1082.35             | 648.75              | 0.148                            | 850.10              | 125.90              |
| A_68_P27284101 | chr10:80040251-80040295                           | NM_078477:-231     | Klf16      | PROMOTER               | 0.620                                           | 0.532                            | 2891.93             | 1539.90             | 0.330                            | 2218.23             | 732.89              |
| A_68_P27284104 | chr10:80040680-80040724                           | NM_078477:-661     | Klf16      | PROMOTER               | 0.553                                           | 0.607                            | 2026.42             | 1230.08             | 0.336                            | 1567.43             | 526.54              |
| A_68_P25960687 | chr8:74843237-74843281                            | NM_008452:298      | Klf2       | INSIDE                 | 0.125                                           | 1.386                            | 4459.19             | 6180.08             | 0.173                            | 2925.50             | 507.23              |
| A_68_P23752952 | chr5:65195598-65195642                            | NM_008453:859      | Klf3       | INSIDE                 | 0.273                                           | 0.420                            | 1300.66             | 546.35              | 0.115                            | 1043.43             | 119.55              |
| A_68_P22934416 | chr4:55543231-55543275                            | NM_010637:2095     | Klf4       | INSIDE                 | 0.568                                           | 0.675                            | 1338.12             | 903.88              | 0.383                            | 1075.42             | 412.35              |
| A_68_P22934418 | chr4:55543459-55543503                            | NM_010637:1867     | Klf4       | INSIDE                 | 0.489                                           | 0.538                            | 1611.10             | 867.00              | 0.263                            | 1261.18             | 332.22              |
| A_68_P22934424 | chr4:55544128-55544172                            | NM_010637:1197     | Klf4       | INSIDE                 | 0.264                                           | 0.534                            | 1468.63             | 784.65              | 0.141                            | 1321.60             | 186.61              |
| A_68_P22934427 | chr4:55544464-55544508                            | NM_010637:861      | Klf4       | INSIDE                 | 0.394                                           | 0.566                            | 1638.41             | 926.60              | 0.223                            | 1245.95             | 277.60              |
| A_68_P29842694 | chr14:99697586-99697630                           | NM_009769:-301     | Klf5       | PROMOTER               | 0.558                                           | 0.555                            | 2008.47             | 1115.62             | 0.310                            | 1623.46             | 502.74              |
| A_68_P29842699 | chr14:99698157-99698201                           | NM_009769:269      | Klf5       | INSIDE                 | 0.599                                           | 0.627                            | 1269.40             | 795.40              | 0.375                            | 1196.09             | 448.72              |
| A_68_P29842704 | chr14:99698682-99698726                           | NM_009769:795      | Klf5       | INSIDE                 | 0.273                                           | 0.515                            | 1114.89             | 574.59              | 0.140                            | 859.70              | 120.74              |
| A_68_P20290945 | chr1:64168690-64168734                            | NM_033563:-749     | Klf7       | PROMOTER               | 0.180                                           | 0.586                            | 1484.49             | 870.28              | 0.105                            | 1106.58             | 116.54              |
| A_68_P32752564 | chrX:149672338-149672390                          | NM_173780:-223     | Klf8       | PROMOTER               | 0.130                                           | 2.195                            | 1003.62             | 2203.31             | 0.286                            | 416.60              | 119.04              |
| A_68_P32752567 | chrX:149672709-149672753                          | NM_173780:143      | Klf8       | INSIDE                 | 0.204                                           | 1.586                            | 2576.06             | 4085.29             | 0.323                            | 1015.29             | 328.05              |
| A_68_P32016038 | chr19:23209873-23209917                           | NM_010638:-5821    | Klf9       | PROMOTER               | 0.222                                           | 0.618                            | 1116.76             | 690.02              | 0.137                            | 856.02              | 117.19              |
| A_68_P32016080 | chr19:23215457-23215501                           | NM_010638:-237     | Klf9       | PROMOTER               | 0.637                                           | 0.486                            | 1225.61             | 595.08              | 0.309                            | 1048.53             | 324.25              |
| A_68_P28513757 | chr12:70398282-70398327                           | NM_027117:637      | Klfhc2     | INSIDE                 | 0.073                                           | 3.260                            | 3464.37             | 11292.49            | 0.239                            | 2091.29             | 499.84              |

| ProbeName      | Target position of probe on CpG island microarray | TargetID          | GeneSymbol | CpG island Description | Ratio of relative methylation (TiO2-NP/Vehicle) | Sham group                       |                     |                     | TiO <sub>2</sub> -H group        |                     |                     |
|----------------|---------------------------------------------------|-------------------|------------|------------------------|-------------------------------------------------|----------------------------------|---------------------|---------------------|----------------------------------|---------------------|---------------------|
|                |                                                   |                   |            |                        |                                                 | Relative methylation (Cy-5/Cy-3) | Cy-3 signal (Input) | Cy-5 signal (MeDIP) | Relative methylation (Cy-5/Cy-3) | Cy-3 signal (Input) | Cy-5 signal (MeDIP) |
| A_68_P24932467 | chr6:147040098-147040142                          | NM_001081237:524  | Klhdc5     | INSIDE                 | 0.284                                           | 0.423                            | 1233.08             | 521.35              | 0.120                            | 989.84              | 118.70              |
| A_68_P28068271 | chr11:100333552-100333596                         | NM_172565:522     | Klhl11     | INSIDE                 | 0.240                                           | 0.560                            | 1198.84             | 671.53              | 0.134                            | 917.33              | 123.31              |
| A_68_P31545963 | chr18:21811255-21811299                           | NM_001081403:407  | Klhl14     | PROMOTER               | 0.294                                           | 0.461                            | 1899.45             | 876.38              | 0.136                            | 1439.61             | 195.37              |
| A_68_P31545964 | chr18:21811364-21811410                           | NM_001081403:-517 | Klhl14     | PROMOTER               | 0.179                                           | 0.623                            | 1563.99             | 974.57              | 0.112                            | 1184.81             | 132.50              |
| A_68_P31545966 | chr18:21811604-21811648                           | NM_001081403:-757 | Klhl14     | PROMOTER               | 0.051                                           | 1.495                            | 4721.84             | 7059.15             | 0.076                            | 3244.50             | 247.11              |
| A_68_P31545967 | chr18:21811707-21811752                           | NM_001081403:-860 | Klhl14     | PROMOTER               | 0.104                                           | 1.613                            | 3155.93             | 5091.46             | 0.168                            | 2050.86             | 344.17              |
| A_68_P30575506 | chr16:17759553-17759597                           | NM_145479:-139    | Klhl22     | PROMOTER               | 0.480                                           | 0.679                            | 1589.70             | 1079.12             | 0.326                            | 1274.65             | 415.05              |
| A_68_P30575507 | chr16:17759672-17759716                           | NM_145479:-19     | Klhl22     | PROMOTER               | 0.531                                           | 0.600                            | 3488.89             | 2093.91             | 0.319                            | 2907.37             | 926.01              |
| A_68_P30575512 | chr16:17760349-17760393                           | NM_145479:657     | Klhl22     | INSIDE                 | 0.462                                           | 0.607                            | 1018.38             | 618.37              | 0.280                            | 861.84              | 241.62              |
| A_68_P21311215 | chr2:69660694-69660738                            | NM_177784:290     | Klhl23     | INSIDE                 | 0.565                                           | 0.647                            | 2109.52             | 1363.94             | 0.365                            | 1700.98             | 621.06              |
| A_68_P28206058 | chr12:5380617-5380662                             | NM_001164493:1849 | Klhl29     | INSIDE                 | 0.568                                           | 0.545                            | 1529.67             | 834.43              | 0.310                            | 1206.06             | 373.61              |
| A_68_P28206067 | chr12:5381571-5381617                             | NM_001164493:894  | Klhl29     | INSIDE                 | 0.224                                           | 0.386                            | 1891.09             | 730.58              | 0.086                            | 1389.97             | 120.09              |
| A_68_P28206069 | chr12:5381867-5381911                             | NM_001164493:600  | Klhl29     | INSIDE                 | 0.646                                           | 0.571                            | 1469.22             | 839.34              | 0.369                            | 1153.24             | 425.71              |
| A_68_P28206071 | chr12:5382006-5382050                             | NM_001164493:460  | Klhl29     | INSIDE                 | 0.405                                           | 0.524                            | 3088.99             | 1617.12             | 0.212                            | 2432.86             | 515.70              |
| A_68_P26655646 | chr9:77502889-77502936                            | NM_172925:18374   | Klhl31     | INSIDE                 | 0.159                                           | 0.706                            | 1266.67             | 893.82              | 0.112                            | 1058.36             | 118.95              |
| A_68_P26216543 | chr8:122394587-122394646                          | NM_146219:8412    | Klhl36     | INSIDE                 | 0.092                                           | 2.460                            | 687.92              | 1692.01             | 0.226                            | 562.75              | 127.29              |
| A_68_P23091882 | chr4:88368088-88368132                            | NM_172871:302     | Klhl9      | INSIDE                 | 0.549                                           | 0.575                            | 1844.70             | 1060.45             | 0.316                            | 1498.88             | 472.96              |
| A_68_P25084097 | chr7:51052779-51052823                            | NM_008940:-146    | Klk8       | PROMOTER               | 0.223                                           | 0.654                            | 1079.39             | 705.65              | 0.146                            | 821.74              | 119.64              |
| A_68_P23226466 | chr4:115563188-115563232                          | NM_001039124:6206 | Knec1      | DOWNSTREAM             | 0.409                                           | 0.556                            | 1854.46             | 1030.70             | 0.227                            | 1582.06             | 359.35              |
| A_68_P23226467 | chr4:115563355-115563399                          | NM_001039124:6372 | Knec1      | DOWNSTREAM             | 0.208                                           | 0.282                            | 2582.53             | 729.15              | 0.059                            | 2030.85             | 119.09              |
| A_68_P24057384 | chr5:124199713-124199761                          | NM_001042421:2    | Kntc1      | INSIDE                 | 0.235                                           | 0.650                            | 1032.62             | 671.61              | 0.153                            | 791.13              | 120.72              |
| A_68_P28104645 | chr11:106861028-106861074                         | NM_010655:-211    | Kpna2      | PROMOTER               | 0.329                                           | 0.625                            | 924.17              | 577.41              | 0.205                            | 751.86              | 154.49              |
| A_68_P29650241 | chr14:62058563-62058607                           | NM_008466:200     | Kpna3      | INSIDE                 | 0.403                                           | 0.405                            | 1537.06             | 622.81              | 0.163                            | 1438.25             | 235.02              |
| A_68_P28049249 | chr11:97049576-97049622                           | NM_008379:-392    | Kpnb1      | PROMOTER               | 0.350                                           | 0.517                            | 3594.87             | 1860.24             | 0.181                            | 2788.10             | 505.66              |
| A_68_P24979758 | chr7:16705347-16705391                            | NM_133727:144     | Kptn       | INSIDE                 | 0.279                                           | 0.601                            | 1547.69             | 929.93              | 0.168                            | 1213.70             | 203.83              |
| A_68_P24921910 | chr6:145197794-145197838                          | NM_021284:935     | Kras       | INSIDE                 | 0.356                                           | 0.734                            | 1962.50             | 1439.52             | 0.261                            | 1309.32             | 341.84              |
| A_68_P24921912 | chr6:145197978-145198027                          | NM_021284:749     | Kras       | INSIDE                 | 0.145                                           | 0.721                            | 2164.39             | 1561.55             | 0.105                            | 1620.53             | 169.47              |
| A_68_P31093374 | chr17:23879287-23879335                           | NM_028416:3486    | Kremen2    | INSIDE                 | 0.307                                           | 1.442                            | 1137.02             | 1639.25             | 0.442                            | 749.28              | 331.12              |
| A_68_P26346365 | chr9:21092135-21092179                            | NM_145416:257     | Kri1       | INSIDE                 | 0.473                                           | 0.659                            | 1141.12             | 752.12              | 0.312                            | 934.66              | 291.63              |
| A_68_P26346370 | chr9:21092650-21092694                            | NM_145416:-259    | Kri1       | PROMOTER               | 0.269                                           | 0.549                            | 2546.79             | 1398.83             | 0.148                            | 1997.49             | 294.68              |
| A_68_P27452133 | chr10:111409980-111410024                         | NM_178610:252     | Krr1       | INSIDE                 | 0.443                                           | 0.542                            | 1265.23             | 685.94              | 0.240                            | 884.31              | 212.47              |
| A_68_P27452135 | chr10:111410230-111410274                         | NM_178610:502     | Krr1       | INSIDE                 | 0.165                                           | 1.345                            | 2836.31             | 3815.35             | 0.222                            | 1978.99             | 439.64              |
| A_68_P28066376 | chr11:100006643-100006687                         | NM_008471:569     | Krt19      | INSIDE                 | 0.428                                           | 0.638                            | 1553.77             | 991.90              | 0.273                            | 1163.22             | 317.88              |
| A_68_P28066377 | chr11:100006745-100006792                         | NM_008471:465     | Krt19      | INSIDE                 | 0.297                                           | 0.402                            | 1333.60             | 536.05              | 0.120                            | 1037.15             | 124.01              |
| A_68_P30491859 | chr15:101269185-101269229                         | NM_001003668:29   | Krr83      | INSIDE                 | 0.239                                           | 0.535                            | 2013.72             | 1078.12             | 0.128                            | 1424.27             | 182.29              |
| A_68_P27947413 | chr11:78959127-78959171                           | NM_013571:708     | Ksr1       | INSIDE                 | 0.292                                           | 0.652                            | 3720.80             | 2427.69             | 0.190                            | 2729.19             | 519.38              |
| A_68_P27947415 | chr11:78959320-78959364                           | NM_013571:514     | Ksr1       | INSIDE                 | 0.099                                           | 0.690                            | 2768.75             | 1909.62             | 0.068                            | 1801.10             | 122.82              |
| A_68_P27947420 | chr11:78960035-78960079                           | NM_013571:-200    | Ksr1       | PROMOTER               | 0.177                                           | 0.373                            | 2319.40             | 865.07              | 0.066                            | 1805.20             | 119.02              |
| A_68_P28516077 | chr12:70825553-70825597                           | NM_145443:287     | L2hgdh     | INSIDE                 | 0.570                                           | 0.620                            | 1226.48             | 760.61              | 0.354                            | 1048.37             | 370.75              |
| A_68_P21809532 | chr2:162769099-162769143                          | NM_001081338:-80  | L3mbtl1    | PROMOTER               | 0.359                                           | 0.395                            | 2115.44             | 834.65              | 0.142                            | 1587.72             | 225.04              |
| A_68_P25310385 | chr7:97089281-97089328                            | NM_026304:391     | 17Rn6      | INSIDE                 | 0.171                                           | 0.728                            | 3396.19             | 2474.01             | 0.124                            | 2516.93             | 312.98              |
| A_68_P20042289 | chr1:13650498-13650542                            | NM_145381:70      | Lactb2     | INSIDE                 | 0.364                                           | 0.613                            | 1278.27             | 783.69              | 0.223                            | 1015.13             | 226.65              |
| A_68_P21902322 | chr2:179959737-179959781                          | NM_001081171:806  | Lama5      | INSIDE                 | 0.417                                           | 0.592                            | 1520.26             | 899.44              | 0.246                            | 1245.47             | 306.94              |
| A_68_P21902323 | chr2:179959846-179959890                          | NM_001081171:696  | Lama5      | INSIDE                 | 0.336                                           | 0.279                            | 2052.96             | 573.01              | 0.094                            | 1737.11             | 162.97              |

| ProbeName      | Target position of probe on CpG island microarray | TargetID           | GeneSymbol | CpG island Description | Ratio of relative methylation (TiO2-NP/Vehicle) | Sham group                       |                     |                     | TiO <sub>2</sub> -H group        |                     |                     |
|----------------|---------------------------------------------------|--------------------|------------|------------------------|-------------------------------------------------|----------------------------------|---------------------|---------------------|----------------------------------|---------------------|---------------------|
|                |                                                   |                    |            |                        |                                                 | Relative methylation (Cy-5/Cy-3) | Cy-3 signal (Input) | Cy-5 signal (MeDIP) | Relative methylation (Cy-5/Cy-3) | Cy-3 signal (Input) | Cy-5 signal (MeDIP) |
| A_68_P21902326 | chr2:179960119-179960164                          | NM_001081171:423   | Lama5      | INSIDE                 | 0.448                                           | 0.542                            | 1267.02             | 686.26              | 0.243                            | 999.45              | 242.55              |
| A_68_P20725330 | chr1:155033404-155033448                          | NM_008485:151      | Lamc2      | INSIDE                 | 0.545                                           | 0.571                            | 1269.63             | 725.03              | 0.311                            | 1053.56             | 327.89              |
| A_68_P20306026 | chr1:67085213-67085257                            | NM_001190984:174   | Lanc1l     | INSIDE                 | 0.570                                           | 0.592                            | 3031.06             | 1795.81             | 0.338                            | 2374.70             | 801.63              |
| A_68_P28225275 | chr12:8928468-8928512                             | NM_008640:378      | Laptn4a    | INSIDE                 | 0.150                                           | 0.633                            | 2476.22             | 1568.69             | 0.095                            | 1910.40             | 182.00              |
| A_68_P28225282 | chr12:8929275-8929319                             | NM_008640:1184     | Laptn4a    | INSIDE                 | 0.207                                           | 0.455                            | 2872.67             | 1306.34             | 0.094                            | 2023.07             | 190.15              |
| A_68_P25965604 | chr8:75876534-75876578                            | NM_010687:-101     | Large      | PROMOTER               | 0.617                                           | 0.495                            | 1383.28             | 684.59              | 0.306                            | 1184.68             | 361.93              |
| A_68_P25965607 | chr8:75876888-75876932                            | NM_010687:-455     | Large      | PROMOTER               | 0.580                                           | 0.640                            | 3075.41             | 1967.19             | 0.371                            | 2662.94             | 987.24              |
| A_68_P25965612 | chr8:75877517-75877561                            | NM_010687:-1083    | Large      | PROMOTER               | 0.326                                           | 0.325                            | 2752.12             | 893.29              | 0.106                            | 1869.82             | 197.79              |
| A_68_P27828607 | chr11:57822062-57822109                           | NM_028451:-480     | Larp1      | PROMOTER               | 0.172                                           | 0.630                            | 1418.58             | 893.35              | 0.108                            | 1154.91             | 124.84              |
| A_68_P22082254 | chr3:40753323-40753367                            | NM_001040399:-1208 | Larp1b     | PROMOTER               | 0.223                                           | 0.727                            | 2704.73             | 1966.74             | 0.162                            | 2073.35             | 336.45              |
| A_68_P22082267 | chr3:40754901-40754949                            | NM_001040399:372   | Larp1b     | INSIDE                 | 0.297                                           | 0.561                            | 1498.78             | 841.48              | 0.167                            | 1141.79             | 190.57              |
| A_68_P30483165 | chr15:99803409-99803453                           | NM_001024526:220   | Larp4      | INSIDE                 | 0.385                                           | 0.684                            | 2794.77             | 1912.37             | 0.263                            | 2103.85             | 553.97              |
| A_68_P28814398 | chr13:9092754-9092798                             | NM_172585:-374     | Larp4b     | PROMOTER               | 0.579                                           | 0.462                            | 2798.39             | 1293.94             | 0.268                            | 2228.87             | 596.23              |
| A_68_P26560493 | chr9:60561252-60561296                            | NM_026235:347      | Larp6      | INSIDE                 | 0.229                                           | 0.463                            | 1618.21             | 749.42              | 0.106                            | 1254.34             | 133.27              |
| A_68_P28052727 | chr11:97661201-97661245                           | NM_010688:237      | Lasp1      | INSIDE                 | 0.247                                           | 0.663                            | 921.86              | 611.42              | 0.164                            | 725.01              | 118.93              |
| A_68_P30482198 | chr15:99602344-99602388                           | NM_028015:580      | Lass5      | INSIDE                 | 0.147                                           | 0.660                            | 1573.99             | 1039.52             | 0.097                            | 1216.34             | 118.16              |
| A_68_P30482203 | chr15:99603119-99603163                           | NM_028015:-194     | Lass5      | PROMOTER               | 0.396                                           | 0.596                            | 2632.96             | 1568.15             | 0.236                            | 2144.25             | 506.20              |
| A_68_P21305449 | chr2:68699678-68699722                            | NM_172856:87       | Lass6      | INSIDE                 | 0.089                                           | 0.714                            | 2771.14             | 1978.10             | 0.063                            | 1875.64             | 118.97              |
| A_68_P31343005 | chr17:73267359-73267403                           | NM_029999:-264     | Lbh        | PROMOTER               | 0.244                                           | 0.389                            | 1741.25             | 676.88              | 0.095                            | 1292.48             | 122.46              |
| A_68_P32137135 | chr19:45298271-45298326                           | NM_010691:11428    | Lbx1       | DOWNSTREAM             | 0.265                                           | 0.492                            | 1426.47             | 701.76              | 0.130                            | 962.12              | 125.49              |
| A_68_P32137138 | chr19:45298661-45298705                           | NM_010691:11044    | Lbx1       | DOWNSTREAM             | 0.268                                           | 0.588                            | 1886.38             | 1108.70             | 0.158                            | 1325.49             | 209.14              |
| A_68_P24591351 | chr6:83036388-83036432                            | NM_010692:52       | Lbx2       | INSIDE                 | 0.104                                           | 0.672                            | 2691.68             | 1809.04             | 0.070                            | 1704.80             | 119.69              |
| A_68_P26683680 | chr9:83341498-83341543                            | NM_029434:-6786    | Lca5       | PROMOTER               | 0.560                                           | 0.624                            | 910.87              | 568.13              | 0.349                            | 741.85              | 258.92              |
| A_68_P30991545 | chr16:96413628-96413672                           | NM_001001492:214   | Lca5l      | INSIDE                 | 0.260                                           | 0.598                            | 1019.46             | 609.31              | 0.155                            | 960.75              | 149.18              |
| A_68_P30991547 | chr16:96413886-96413930                           | NM_001001492:-44   | Lca5l      | DIVERGENT_PROMOTER     | 0.196                                           | 0.543                            | 2338.07             | 1269.88             | 0.106                            | 1744.40             | 185.29              |
| A_68_P31344183 | chr17:73457385-73457429                           | NM_001081071:82    | Lclat1     | INSIDE                 | 0.523                                           | 0.321                            | 1799.39             | 577.36              | 0.168                            | 1490.87             | 250.21              |
| A_68_P31344185 | chr17:73457680-73457725                           | NM_001081071:378   | Lclat1     | INSIDE                 | 0.096                                           | 0.605                            | 2613.75             | 1580.26             | 0.058                            | 2063.89             | 119.58              |
| A_68_P25484147 | chr7:130521434-130521478                          | NM_025304:-39      | Lcmt1      | DIVERGENT_PROMOTER     | 0.271                                           | 0.411                            | 1585.90             | 652.59              | 0.111                            | 1099.91             | 122.53              |
| A_68_P25484148 | chr7:130521551-130521596                          | NM_025304:78       | Lcmt1      | INSIDE                 | 0.239                                           | 0.470                            | 1227.30             | 577.17              | 0.112                            | 1032.20             | 115.86              |
| A_68_P23658787 | chr5:46247794-46247838                            | NM_172153:-25      | Lcor1      | PROMOTER               | 0.148                                           | 0.525                            | 4074.36             | 2140.18             | 0.078                            | 2739.42             | 213.26              |
| A_68_P25101649 | chr7:54101500-54101544                            | NM_001136069:-929  | Ldha       | PROMOTER               | 0.164                                           | 0.529                            | 1557.57             | 823.47              | 0.087                            | 1395.24             | 120.98              |
| A_68_P21475553 | chr2:102026602-102026646                          | NM_178886:-90      | Ldlrad3    | PROMOTER               | 0.212                                           | 0.633                            | 1564.80             | 990.89              | 0.134                            | 1390.68             | 186.51              |
| A_68_P22530170 | chr3:130814530-130814579                          | NM_010703:1166     | Lef1       | INSIDE                 | 0.169                                           | 0.713                            | 1306.94             | 931.43              | 0.121                            | 1001.02             | 120.63              |
| A_68_P22201239 | chr3:65462965-65463009                            | NM_001166659:-7163 | Lekr1      | PROMOTER               | 0.246                                           | 0.638                            | 1854.25             | 1182.19             | 0.157                            | 1453.43             | 228.11              |
| A_68_P27500772 | chr10:120415468-120415512                         | NM_001081193:896   | Lemd3      | INSIDE                 | 0.620                                           | 0.574                            | 977.29              | 561.25              | 0.356                            | 794.67              | 282.79              |
| A_68_P26644014 | chr9:75289095-75289140                            | NM_001039522:-213  | Leo1       | PROMOTER               | 0.425                                           | 0.669                            | 1036.55             | 693.78              | 0.284                            | 843.34              | 239.68              |
| A_68_P23156636 | chr4:101390083-101390127                          | NM_010704:93       | Lepr       | INSIDE                 | 0.457                                           | 0.542                            | 1020.14             | 552.64              | 0.247                            | 822.63              | 203.49              |
| A_68_P24817384 | chr6:124806960-124807011                          | NM_013534:720      | Leprel2    | INSIDE                 | 0.163                                           | 0.560                            | 1692.23             | 947.48              | 0.091                            | 1288.16             | 117.63              |
| A_68_P24817385 | chr6:124807053-124807099                          | NM_013534:629      | Leprel2    | INSIDE                 | 0.305                                           | 0.543                            | 992.44              | 539.18              | 0.165                            | 751.11              | 124.31              |
| A_68_P25727978 | chr8:26707398-26707452                            | NM_173012:535      | Letm2      | INSIDE                 | 0.156                                           | 0.694                            | 1541.18             | 1069.57             | 0.108                            | 1101.85             | 119.26              |
| A_68_P25727980 | chr8:26707531-26707578                            | NM_173012:405      | Letm2      | INSIDE                 | 0.185                                           | 0.690                            | 1228.19             | 846.90              | 0.128                            | 992.94              | 127.01              |
| A_68_P25727984 | chr8:26707935-26707980                            | NM_173012:2        | Letm2      | INSIDE                 | 0.384                                           | 0.742                            | 5217.74             | 3873.84             | 0.285                            | 3736.09             | 1064.50             |
| A_68_P24142214 | chr5:141082926-141082970                          | NM_008494:-346     | Lfng       | PROMOTER               | 0.240                                           | 0.299                            | 2280.33             | 682.81              | 0.072                            | 1610.79             | 115.87              |
| A_68_P30363244 | chr15:78758585-78758629                           | NM_008495:1452     | Lgals1     | INSIDE                 | 0.250                                           | 0.499                            | 1257.39             | 627.81              | 0.125                            | 961.17              | 120.08              |

| ProbeName      | Target position of probe on CpG island microarray | TargetID            | GeneSymbol | CpG island Description | Ratio of relative methylation (TiO2-NP/Vehicle) | Sham group                       |                     |                     | TiO <sub>2</sub> -H group        |                     |                     |
|----------------|---------------------------------------------------|---------------------|------------|------------------------|-------------------------------------------------|----------------------------------|---------------------|---------------------|----------------------------------|---------------------|---------------------|
|                |                                                   |                     |            |                        |                                                 | Relative methylation (Cy-5/Cy-3) | Cy-3 signal (Input) | Cy-5 signal (MeDIP) | Relative methylation (Cy-5/Cy-3) | Cy-3 signal (Input) | Cy-5 signal (MeDIP) |
| A_68_P29581906 | chr14:47993698-47993742                           | NM_001145953:186    | Lgals3     | INSIDE                 | 0.625                                           | 0.638                            | 1990.11             | 1270.59             | 0.399                            | 1817.17             | 725.14              |
| A_68_P28832392 | chr13:12553513-12553557                           | NM_001199043:471    | Lgals8     | INSIDE                 | 0.577                                           | 0.611                            | 1021.01             | 623.80              | 0.352                            | 870.26              | 306.72              |
| A_68_P28832394 | chr13:12553847-12553891                           | NM_001199043:137    | Lgals8     | INSIDE                 | 0.285                                           | 0.707                            | 1827.52             | 1291.24             | 0.201                            | 1343.56             | 270.44              |
| A_68_P21517947 | chr2:109757830-109757874                          | NM_172671:49        | Lgr4       | INSIDE                 | 0.667                                           | 0.625                            | 1149.45             | 718.29              | 0.417                            | 966.96              | 402.85              |
| A_68_P27470613 | chr10:115024518-115024562                         | NM_010195:296       | Lgr5       | INSIDE                 | 0.389                                           | 0.548                            | 1972.97             | 1081.22             | 0.213                            | 1512.60             | 322.24              |
| A_68_P20636647 | chr1:136884516-136884560                          | NM_001033409:117315 | Lgr6       | INSIDE                 | 0.249                                           | 0.558                            | 1194.18             | 665.95              | 0.139                            | 948.90              | 131.66              |
| A_68_P22139474 | chr3:52845318-52845362                            | NM_175386:-128      | Lhfp       | PROMOTER               | 0.485                                           | 0.698                            | 2128.02             | 1485.84             | 0.339                            | 1611.47             | 545.91              |
| A_68_P29233347 | chr13:94944386-94944430                           | NM_172589:116658    | Lhfp12     | INSIDE                 | 0.348                                           | 0.730                            | 2550.73             | 1860.93             | 0.254                            | 1880.91             | 477.32              |
| A_68_P24758095 | chr6:113143886-113143930                          | NM_177763:1470      | Lhfp14     | INSIDE                 | 0.424                                           | 0.550                            | 930.66              | 511.41              | 0.233                            | 748.36              | 174.18              |
| A_68_P31123144 | chr17:28712407-28712451                           | NM_026571:-235      | Lhfp15     | PROMOTER               | 0.306                                           | 0.555                            | 1443.17             | 800.38              | 0.170                            | 1195.70             | 202.74              |
| A_68_P25535615 | chr7:139802512-139802556                          | NM_029609:209       | Lhpp       | INSIDE                 | 0.250                                           | 0.677                            | 1632.46             | 1104.72             | 0.169                            | 1279.92             | 216.22              |
| A_68_P27977992 | chr11:84338560-84338604                           | NM_008498:454       | Lhx1       | INSIDE                 | 0.575                                           | 0.719                            | 1637.36             | 1176.99             | 0.413                            | 1242.14             | 513.35              |
| A_68_P21147620 | chr2:38204034-38204078                            | NM_010710:-2771     | Lhx2       | PROMOTER               | 0.214                                           | 0.698                            | 1219.42             | 850.76              | 0.149                            | 904.37              | 134.90              |
| A_68_P21147671 | chr2:38210043-38210094                            | NM_010710:3241      | Lhx2       | INSIDE                 | 0.548                                           | 0.563                            | 946.02              | 532.52              | 0.308                            | 580.27              | 178.99              |
| A_68_P21147673 | chr2:38210263-38210310                            | NM_010710:3459      | Lhx2       | INSIDE                 | 0.325                                           | 0.537                            | 2109.82             | 1133.30             | 0.174                            | 1665.38             | 290.44              |
| A_68_P21147687 | chr2:38212141-38212185                            | NM_010710:5335      | Lhx2       | INSIDE                 | 0.155                                           | 0.638                            | 2348.15             | 1498.43             | 0.099                            | 1624.60             | 161.05              |
| A_68_P21147691 | chr2:38212503-38212547                            | NM_010710:5697      | Lhx2       | INSIDE                 | 0.592                                           | 0.527                            | 1144.24             | 602.93              | 0.312                            | 948.15              | 295.77              |
| A_68_P21077003 | chr2:26057606-26057650                            | NM_001039653:4448   | Lhx3       | INSIDE                 | 0.466                                           | 0.441                            | 2104.38             | 927.16              | 0.205                            | 1689.06             | 346.69              |
| A_68_P21077040 | chr2:26061806-26061850                            | NM_001039653:248    | Lhx3       | INSIDE                 | 0.587                                           | 0.674                            | 1325.00             | 892.57              | 0.395                            | 1011.50             | 400.02              |
| A_68_P20739566 | chr1:157584400-157584444                          | NM_010712:4735      | Lhx4       | INSIDE                 | 0.459                                           | 0.420                            | 2129.12             | 894.97              | 0.193                            | 1586.13             | 306.27              |
| A_68_P20739601 | chr1:157588425-157588469                          | NM_010712:711       | Lhx4       | INSIDE                 | 0.202                                           | 0.494                            | 1652.57             | 816.53              | 0.100                            | 1243.00             | 123.79              |
| A_68_P20739602 | chr1:157588540-157588584                          | NM_010712:595       | Lhx4       | INSIDE                 | 0.211                                           | 0.559                            | 1290.80             | 721.36              | 0.118                            | 1000.12             | 118.05              |
| A_68_P20739604 | chr1:157588731-157588781                          | NM_010712:401       | Lhx4       | INSIDE                 | 0.264                                           | 0.577                            | 1144.34             | 660.76              | 0.152                            | 772.62              | 117.78              |
| A_68_P20739614 | chr1:157590081-157590125                          | NM_010712:-945      | Lhx4       | PROMOTER               | 0.472                                           | 0.703                            | 5881.13             | 4136.58             | 0.332                            | 4653.92             | 1546.13             |
| A_68_P24038671 | chr5:120881905-120881949                          | NM_008499:32        | Lhx5       | INSIDE                 | 0.184                                           | 0.728                            | 1770.78             | 1289.00             | 0.134                            | 1363.93             | 182.33              |
| A_68_P24038672 | chr5:120882014-120882058                          | NM_008499:142       | Lhx5       | INSIDE                 | 0.486                                           | 0.436                            | 1538.10             | 670.10              | 0.212                            | 1325.14             | 280.69              |
| A_68_P24038673 | chr5:120882123-120882167                          | NM_008499:250       | Lhx5       | INSIDE                 | 0.166                                           | 0.539                            | 1776.36             | 957.52              | 0.089                            | 1337.60             | 119.65              |
| A_68_P24038700 | chr5:120885515-120885559                          | NM_008499:3642      | Lhx5       | INSIDE                 | 0.541                                           | 0.456                            | 4240.57             | 1934.99             | 0.247                            | 3343.32             | 825.08              |
| A_68_P24038701 | chr5:120885606-120885650                          | NM_008499:3734      | Lhx5       | INSIDE                 | 0.471                                           | 0.399                            | 2019.20             | 806.60              | 0.188                            | 1501.33             | 282.27              |
| A_68_P24038702 | chr5:120885755-120885799                          | NM_008499:3882      | Lhx5       | INSIDE                 | 0.236                                           | 0.574                            | 2246.26             | 1288.75             | 0.135                            | 1720.35             | 232.70              |
| A_68_P24038703 | chr5:120885821-120885873                          | NM_008499:3952      | Lhx5       | INSIDE                 | 0.233                                           | 0.532                            | 1193.21             | 635.22              | 0.124                            | 972.07              | 120.79              |
| A_68_P24038737 | chr5:120890387-120890431                          | NM_008499:8514      | Lhx5       | INSIDE                 | 0.181                                           | 0.572                            | 1899.66             | 1086.15             | 0.104                            | 1449.40             | 150.04              |
| A_68_P21137726 | chr2:35946774-35946818                            | NM_001083126:12784  | Lhx6       | INSIDE                 | 0.202                                           | 0.448                            | 2055.55             | 920.94              | 0.091                            | 1429.55             | 129.42              |
| A_68_P21137750 | chr2:35949963-35950016                            | NM_001083126:9591   | Lhx6       | INSIDE                 | 0.168                                           | 0.657                            | 1695.06             | 1113.25             | 0.110                            | 1196.99             | 132.17              |
| A_68_P21137822 | chr2:35958973-35959017                            | NM_001083126:586    | Lhx6       | INSIDE                 | 0.202                                           | 0.429                            | 2004.19             | 860.63              | 0.087                            | 1632.53             | 141.74              |
| A_68_P21137823 | chr2:35959065-35959110                            | NM_001083126:493    | Lhx6       | INSIDE                 | 0.272                                           | 0.451                            | 1462.87             | 659.90              | 0.123                            | 981.61              | 120.30              |
| A_68_P21137825 | chr2:35959267-35959311                            | NM_001083126:292    | Lhx6       | INSIDE                 | 0.183                                           | 0.726                            | 2268.44             | 1646.77             | 0.133                            | 1756.97             | 233.27              |
| A_68_P21137835 | chr2:35960385-35960443                            | NM_001083126:-834   | Lhx6       | PROMOTER               | 0.168                                           | 0.634                            | 1477.68             | 937.11              | 0.106                            | 1118.38             | 119.09              |
| A_68_P21137836 | chr2:35960496-35960540                            | NM_001083126:-938   | Lhx6       | PROMOTER               | 0.401                                           | 1.336                            | 8929.66             | 11925.85            | 0.536                            | 6249.44             | 3346.87             |
| A_68_P22661991 | chr3:153992609-153992654                          | NM_010713:893       | Lhx8       | INSIDE                 | 0.250                                           | 0.520                            | 1089.44             | 566.10              | 0.130                            | 925.76              | 120.41              |
| A_68_P28099907 | chr11:106022041-106022085                         | NM_172397:-606      | Limd2      | PROMOTER               | 0.260                                           | 0.509                            | 1120.65             | 570.89              | 0.133                            | 885.89              | 117.42              |
| A_68_P24112795 | chr5:135164074-135164118                          | NM_010717:364       | Limk1      | INSIDE                 | 0.408                                           | 0.682                            | 5503.00             | 3753.40             | 0.279                            | 3918.82             | 1091.53             |
| A_68_P24112796 | chr5:135164221-135164265                          | NM_010717:218       | Limk1      | INSIDE                 | 0.245                                           | 0.638                            | 1035.06             | 660.74              | 0.157                            | 745.45              | 116.75              |
| A_68_P27163119 | chr10:57785941-57785985                           | NM_026148:-251      | Lims1      | PROMOTER               | 0.396                                           | 0.680                            | 1897.17             | 1290.62             | 0.269                            | 1413.46             | 380.81              |

| ProbeName      | Target position of probe on CpG island microarray | TargetID           | GeneSymbol | CpG island Description | Ratio of relative methylation (TiO2-NP/Vehicle) | Sham group                       |                     |                     | TiO <sub>2</sub> -H group        |                     |                     |
|----------------|---------------------------------------------------|--------------------|------------|------------------------|-------------------------------------------------|----------------------------------|---------------------|---------------------|----------------------------------|---------------------|---------------------|
|                |                                                   |                    |            |                        |                                                 | Relative methylation (Cy-5/Cy-3) | Cy-3 signal (Input) | Cy-5 signal (MeDIP) | Relative methylation (Cy-5/Cy-3) | Cy-3 signal (Input) | Cy-5 signal (MeDIP) |
| A_68_P25092713 | chr7:52625245-52625289                            | NM_011698:668      | Lin7b      | INSIDE                 | 0.328                                           | 0.646                            | 1494.01             | 964.68              | 0.212                            | 1244.88             | 264.01              |
| A_68_P25092716 | chr7:52625642-52625686                            | NM_011698:270      | Lin7b      | INSIDE                 | 0.140                                           | 0.512                            | 2044.28             | 1047.66             | 0.072                            | 1622.61             | 116.58              |
| A_68_P22843571 | chr4:36897285-36897329                            | NM_001165999:1471  | Lingo2     | INSIDE                 | 0.282                                           | 0.649                            | 1776.84             | 1152.69             | 0.183                            | 1408.41             | 258.00              |
| A_68_P25010078 | chr7:26165068-26165112                            | NM_001039507:10035 | Lipe       | INSIDE                 | 0.439                                           | 0.459                            | 1245.19             | 571.35              | 0.201                            | 898.86              | 181.09              |
| A_68_P28155559 | chr11:115685801-115685845                         | NM_145438:451      | Llgl2      | INSIDE                 | 0.613                                           | 0.546                            | 2563.04             | 1399.14             | 0.334                            | 1948.82             | 651.73              |
| A_68_P28155560 | chr11:115685911-115685955                         | NM_145438:561      | Llgl2      | INSIDE                 | 0.178                                           | 0.519                            | 2565.41             | 1330.25             | 0.092                            | 1869.48             | 172.17              |
| A_68_P28155820 | chr11:115719994-115720038                         | NM_145438:34645    | Llgl2      | DOWNSTREAM             | 0.386                                           | 0.695                            | 1326.79             | 922.46              | 0.268                            | 1040.21             | 279.24              |
| A_68_P27495998 | chr10:119664180-119664224                         | NM_025431:87       | Llph       | INSIDE                 | 0.424                                           | 0.414                            | 1261.65             | 522.47              | 0.176                            | 993.23              | 174.57              |
| A_68_P31784506 | chr18:66162058-66162102                           | NM_027400:209      | Lman1      | INSIDE                 | 0.354                                           | 0.575                            | 1069.30             | 614.96              | 0.204                            | 917.62              | 186.92              |
| A_68_P31784508 | chr18:66162318-66162362                           | NM_027400:-51      | Lman1      | PROMOTER               | 0.293                                           | 0.509                            | 1077.33             | 548.48              | 0.149                            | 878.66              | 130.92              |
| A_68_P29054563 | chr13:55463630-55463674                           | NM_025828:492      | Lman2      | INSIDE                 | 0.534                                           | 0.582                            | 2594.81             | 1511.19             | 0.311                            | 1910.63             | 594.39              |
| A_68_P20148353 | chr1:36501896-36501940                            | NM_001013374:166   | Lman2l     | INSIDE                 | 0.181                                           | 0.726                            | 2408.16             | 1749.22             | 0.132                            | 1650.16             | 217.32              |
| A_68_P30477339 | chr15:98748465-98748509                           | NM_029098:43       | Lmbr1l     | INSIDE                 | 0.257                                           | 0.535                            | 1280.29             | 684.76              | 0.138                            | 1047.75             | 144.24              |
| A_68_P30004453 | chr15:9070451-9070495                             | NM_177178:147      | Lmbrd2     | INSIDE                 | 0.245                                           | 0.418                            | 1601.35             | 669.70              | 0.102                            | 1191.30             | 121.89              |
| A_68_P31104860 | chr17:25716044-25716088                           | NM_029624:-52      | Lmf1       | DIVERGENT_PROMOTER     | 0.182                                           | 0.493                            | 1763.91             | 870.04              | 0.090                            | 1406.46             | 126.53              |
| A_68_P31104861 | chr17:25716207-25716251                           | NM_029624:110      | Lmf1       | INSIDE                 | 0.177                                           | 0.492                            | 2633.19             | 1294.44             | 0.087                            | 1919.27             | 167.02              |
| A_68_P31104862 | chr17:25716282-25716326                           | NM_029624:186      | Lmf1       | INSIDE                 | 0.577                                           | 0.708                            | 1309.45             | 926.46              | 0.409                            | 987.70              | 403.56              |
| A_68_P30424715 | chr15:89185807-89185851                           | NM_178919:262      | Lmf2       | INSIDE                 | 0.555                                           | 0.665                            | 1547.05             | 1028.76             | 0.369                            | 1238.97             | 457.63              |
| A_68_P30424716 | chr15:89185877-89185921                           | NM_178919:192      | Lmf2       | INSIDE                 | 0.273                                           | 0.364                            | 1616.69             | 588.23              | 0.099                            | 1185.44             | 117.79              |
| A_68_P30656039 | chr16:33062880-33062924                           | NM_172823:296      | Lmln       | INSIDE                 | 0.605                                           | 0.441                            | 2475.71             | 1090.93             | 0.266                            | 1927.64             | 513.59              |
| A_68_P31731707 | chr18:56868451-56868495                           | NM_010721:1006     | Lmnb1      | INSIDE                 | 0.522                                           | 0.653                            | 1130.13             | 737.47              | 0.340                            | 888.28              | 302.36              |
| A_68_P27286341 | chr10:80380635-80380679                           | NM_010722:334      | Lmnb2      | INSIDE                 | 0.472                                           | 0.487                            | 1673.95             | 814.70              | 0.230                            | 1361.95             | 312.94              |
| A_68_P27286342 | chr10:80380790-80380834                           | NM_010722:178      | Lmnb2      | INSIDE                 | 0.621                                           | 0.559                            | 1287.32             | 720.17              | 0.347                            | 1064.87             | 369.65              |
| A_68_P21486502 | chr2:103810841-103810885                          | NM_001142335:419   | Lmo2       | INSIDE                 | 0.582                                           | 0.502                            | 2107.53             | 1058.46             | 0.292                            | 1592.02             | 465.02              |
| A_68_P22601419 | chr3:143865258-143865302                          | NM_001161770:16    | Lmo4       | INSIDE                 | 0.156                                           | 0.603                            | 2736.89             | 1650.83             | 0.094                            | 1758.72             | 165.69              |
| A_68_P29856566 | chr14:102128766-102128810                         | NM_201529:-356     | Lmo7       | PROMOTER               | 0.506                                           | 0.395                            | 1807.39             | 714.19              | 0.200                            | 1485.16             | 296.82              |
| A_68_P29856567 | chr14:102128847-102128891                         | NM_201529:-276     | Lmo7       | PROMOTER               | 0.248                                           | 0.566                            | 1138.18             | 644.40              | 0.140                            | 966.86              | 135.63              |
| A_68_P29856570 | chr14:102129092-102129136                         | NM_201529:-30      | Lmo7       | PROMOTER               | 0.656                                           | 0.543                            | 1325.98             | 719.70              | 0.356                            | 1049.77             | 373.79              |
| A_68_P20806518 | chr1:169618425-169618469                          | NM_033652:-1242    | Lmx1a      | PROMOTER               | 0.353                                           | 0.668                            | 873.48              | 583.44              | 0.236                            | 656.47              | 154.73              |
| A_68_P20806524 | chr1:169619169-169619217                          | NM_033652:-496     | Lmx1a      | PROMOTER               | 0.481                                           | 0.492                            | 1224.37             | 602.89              | 0.237                            | 1036.42             | 245.71              |
| A_68_P21122318 | chr2:33436169-33436213                            | NM_010725:59841    | Lmx1b      | INSIDE                 | 0.181                                           | 0.541                            | 1521.56             | 822.65              | 0.098                            | 1185.10             | 115.98              |
| A_68_P21122320 | chr2:33436378-33436430                            | NM_010725:59627    | Lmx1b      | INSIDE                 | 0.157                                           | 0.511                            | 2344.33             | 1197.65             | 0.080                            | 1504.80             | 120.45              |
| A_68_P21122321 | chr2:33436455-33436499                            | NM_010725:59555    | Lmx1b      | INSIDE                 | 0.240                                           | 0.472                            | 1498.85             | 707.39              | 0.113                            | 1062.56             | 120.34              |
| A_68_P21122681 | chr2:33487222-33487266                            | NM_010725:8787     | Lmx1b      | INSIDE                 | 0.341                                           | 0.593                            | 1550.97             | 919.68              | 0.202                            | 1177.14             | 238.06              |
| A_68_P21122747 | chr2:33495004-33495053                            | NM_010725:1003     | Lmx1b      | INSIDE                 | 0.202                                           | 0.543                            | 1509.64             | 820.36              | 0.110                            | 1078.16             | 118.27              |
| A_68_P21122748 | chr2:33495093-33495137                            | NM_010725:917      | Lmx1b      | INSIDE                 | 0.386                                           | 0.530                            | 1146.85             | 607.31              | 0.204                            | 857.04              | 175.20              |
| A_68_P21122757 | chr2:33496008-33496052                            | NM_010725:1        | Lmx1b      | INSIDE                 | 0.178                                           | 0.495                            | 1718.67             | 851.39              | 0.088                            | 1333.11             | 117.87              |
| A_68_P21122772 | chr2:33498002-33498046                            | NM_010725:-1993    | Lmx1b      | PROMOTER               | 0.316                                           | 0.547                            | 2287.78             | 1251.52             | 0.173                            | 1801.96             | 311.68              |
| A_68_P21338177 | chr2:74416496-74416545                            | NM_001110209:485   | Lnp        | INSIDE                 | 0.182                                           | 0.694                            | 1429.85             | 991.99              | 0.126                            | 1201.84             | 151.70              |
| A_68_P31074422 | chr17:17761131-17761175                           | NM_172827:301      | Lnp        | INSIDE                 | 0.217                                           | 0.675                            | 3437.73             | 2320.19             | 0.147                            | 2441.17             | 357.67              |
| A_68_P31074423 | chr17:17761336-17761380                           | NM_172827:95       | Lnp        | INSIDE                 | 0.358                                           | 0.465                            | 2106.22             | 978.49              | 0.166                            | 1721.33             | 286.52              |
| A_68_P31074431 | chr17:17762209-17762253                           | NM_172827:-777     | Lnp        | PROMOTER               | 0.318                                           | 0.525                            | 2919.16             | 1531.48             | 0.167                            | 2095.34             | 349.74              |
| A_68_P31074433 | chr17:17762462-17762506                           | NM_172827:-1031    | Lnp        | PROMOTER               | 0.096                                           | 1.541                            | 4977.27             | 7669.21             | 0.149                            | 3293.10             | 489.09              |
| A_68_P24171751 | chr5:147888207-147888251                          | NM_080795:-80      | Lnx2       | DIVERGENT_PROMOTER     | 0.367                                           | 0.432                            | 1415.22             | 610.72              | 0.159                            | 1052.78             | 166.95              |

| ProbeName      | Target position of probe on CpG island microarray | TargetID           | GeneSymbol   | CpG island Description | Ratio of relative methylation (TiO2-NP/Vehicle) | Sham group                       |                     |                     | TiO <sub>2</sub> -H group        |                     |                     |
|----------------|---------------------------------------------------|--------------------|--------------|------------------------|-------------------------------------------------|----------------------------------|---------------------|---------------------|----------------------------------|---------------------|---------------------|
|                |                                                   |                    |              |                        |                                                 | Relative methylation (Cy-5/Cy-3) | Cy-3 signal (Input) | Cy-5 signal (MeDIP) | Relative methylation (Cy-5/Cy-3) | Cy-3 signal (Input) | Cy-5 signal (MeDIP) |
| A_68_P21037807 | chr2:17949322-17949366                            | NR_028378:469      | LOC100034739 | INSIDE                 | 0.199                                           | 0.653                            | 1963.96             | 1282.65             | 0.130                            | 1479.02             | 192.21              |
| A_68_P20353555 | chr1:75366170-75366222                            | NR_037976:5394     | LOC100503248 | INSIDE                 | 0.361                                           | 1.945                            | 2112.18             | 4107.44             | 0.702                            | 1463.37             | 1026.86             |
| A_68_P27533640 | chr10:126478229-126478273                         | NM_001205036:200   | LOC100504608 | INSIDE                 | 0.282                                           | 0.361                            | 2077.96             | 751.15              | 0.102                            | 1620.47             | 165.27              |
| A_68_P31257378 | chr17:56765895-56765939                           | NM_028782:410      | Lonp1        | INSIDE                 | 0.226                                           | 0.533                            | 1370.49             | 730.40              | 0.121                            | 1002.40             | 120.89              |
| A_68_P32318077 | chrX:33870275-33870326                            | NM_028894:1897     | Lonrf3       | INSIDE                 | 0.168                                           | 1.844                            | 973.19              | 1794.96             | 0.309                            | 378.95              | 117.19              |
| A_68_P31708194 | chr18:52689223-52689267                           | NM_010728:118      | Lox          | INSIDE                 | 0.256                                           | 0.639                            | 1116.91             | 714.20              | 0.164                            | 922.54              | 151.29              |
| A_68_P29696147 | chr14:70008844-70008888                           | NM_033325:416      | Lox12        | PROMOTER               | 0.387                                           | 1.695                            | 4811.56             | 8155.31             | 0.656                            | 3027.77             | 1985.36             |
| A_68_P29696148 | chr14:70008926-70008970                           | NM_033325:334      | Lox12        | PROMOTER               | 0.053                                           | 1.760                            | 4525.86             | 7966.21             | 0.092                            | 2920.66             | 269.90              |
| A_68_P29696150 | chr14:70009101-70009145                           | NM_033325:160      | Lox12        | PROMOTER               | 0.197                                           | 0.598                            | 4983.34             | 2978.11             | 0.118                            | 3416.03             | 401.66              |
| A_68_P29696151 | chr14:70009216-70009260                           | NM_033325:44       | Lox12        | PROMOTER               | 0.185                                           | 0.694                            | 2406.26             | 1671.06             | 0.128                            | 1801.19             | 231.32              |
| A_68_P32122223 | chr19:42674559-42674603                           | NM_001164311:12716 | Lox14        | INSIDE                 | 0.390                                           | 1.433                            | 1197.83             | 1716.78             | 0.559                            | 945.09              | 528.24              |
| A_68_P22951805 | chr4:58566279-58566323                            | NM_172989:135      | Lpar1        | PROMOTER               | 0.325                                           | 0.581                            | 1485.20             | 862.66              | 0.189                            | 1231.58             | 232.16              |
| A_68_P26068286 | chr8:95379269-95379313                            | NM_173014:42       | Lpcat2       | INSIDE                 | 0.298                                           | 0.635                            | 3188.41             | 2024.16             | 0.189                            | 2268.79             | 429.12              |
| A_68_P24816264 | chr6:124612578-124612622                          | NM_145130:521      | Lpcat3       | PROMOTER               | 0.283                                           | 0.591                            | 1112.55             | 657.42              | 0.167                            | 968.93              | 162.25              |
| A_68_P24816270 | chr6:124613220-124613264                          | NM_145130:121      | Lpcat3       | INSIDE                 | 0.485                                           | 0.680                            | 2281.06             | 1550.91             | 0.330                            | 1601.01             | 528.04              |
| A_68_P24816271 | chr6:124613291-124613335                          | NM_145130:191      | Lpcat3       | INSIDE                 | 0.067                                           | 0.552                            | 4653.68             | 2567.20             | 0.037                            | 3141.69             | 116.63              |
| A_68_P26016963 | chr8:86423548-86423592                            | NM_181039:426      | Lphn1        | PROMOTER               | 0.211                                           | 1.819                            | 1385.72             | 2520.14             | 0.384                            | 862.35              | 330.90              |
| A_68_P26016964 | chr8:86423687-86423732                            | NM_181039:287      | Lphn1        | PROMOTER               | 0.213                                           | 0.567                            | 3680.21             | 2085.07             | 0.121                            | 2727.19             | 329.79              |
| A_68_P23839619 | chr5:81758936-81758980                            | NM_198702:308341   | Lphn3        | INSIDE                 | 0.396                                           | 1.822                            | 2298.64             | 4187.16             | 0.722                            | 1764.06             | 1273.14             |
| A_68_P23842572 | chr5:82223907-82223953                            | NM_198702:773313   | Lphn3        | INSIDE                 | 0.596                                           | 2.820                            | 711.71              | 2007.26             | 1.681                            | 568.12              | 954.97              |
| A_68_P27996401 | chr11:87630681-87630732                           | NM_080420:8910     | Lpo          | INSIDE                 | 0.297                                           | 0.421                            | 1352.36             | 569.03              | 0.125                            | 910.85              | 113.94              |
| A_68_P22281944 | chr3:82708169-82708225                            | NM_023624:300      | Lrat         | PROMOTER               | 0.232                                           | 0.448                            | 1438.07             | 644.30              | 0.104                            | 1180.35             | 122.71              |
| A_68_P22301529 | chr3:86028379-86028423                            | NM_001077687:211   | Lrba         | PROMOTER               | 0.386                                           | 0.501                            | 2111.14             | 1058.28             | 0.193                            | 1730.67             | 334.87              |
| A_68_P29725078 | chr14:75347229-75347273                           | NM_001033439:434   | Lrch1        | INSIDE                 | 0.382                                           | 0.517                            | 1295.66             | 669.60              | 0.198                            | 1038.95             | 205.20              |
| A_68_P29725079 | chr14:75347435-75347479                           | NM_001033439:228   | Lrch1        | INSIDE                 | 0.635                                           | 0.681                            | 2126.09             | 1447.08             | 0.432                            | 1683.23             | 727.52              |
| A_68_P32730440 | chrX:143988591-143988635                          | NM_001081173:12    | Lrch2        | INSIDE                 | 0.062                                           | 2.353                            | 2924.30             | 6880.77             | 0.146                            | 1103.33             | 161.60              |
| A_68_P30655247 | chr16:32914173-32914217                           | NM_001081255:9     | Lrch3        | INSIDE                 | 0.197                                           | 0.574                            | 1413.09             | 811.09              | 0.113                            | 1289.46             | 146.07              |
| A_68_P24126716 | chr5:138070623-138070667                          | NM_001168652:294   | Lrch4        | INSIDE                 | 0.107                                           | 0.690                            | 2647.20             | 1825.83             | 0.074                            | 1832.18             | 135.32              |
| A_68_P24126717 | chr5:138070748-138070792                          | NM_001168652:420   | Lrch4        | INSIDE                 | 0.239                                           | 0.619                            | 3670.65             | 2271.46             | 0.148                            | 2544.93             | 377.02              |
| A_68_P31220005 | chr17:49071091-49071135                           | NM_027452:794      | Lrfin2       | PROMOTER               | 0.428                                           | 0.459                            | 1700.17             | 780.47              | 0.196                            | 1290.14             | 253.30              |
| A_68_P31220014 | chr17:49072235-49072279                           | NM_027452:350      | Lrfin2       | INSIDE                 | 0.514                                           | 0.570                            | 1560.05             | 889.24              | 0.293                            | 1206.37             | 353.68              |
| A_68_P28480019 | chr12:62623999-62624043                           | NM_178714:1598     | Lrfin5       | PROMOTER               | 0.107                                           | 0.697                            | 2153.58             | 1500.76             | 0.075                            | 1554.05             | 116.10              |
| A_68_P31253992 | chr17:56260257-56260301                           | NM_029796:1091     | Lrg1         | INSIDE                 | 0.232                                           | 0.475                            | 1515.77             | 720.31              | 0.110                            | 1143.42             | 125.89              |
| A_68_P24658386 | chr6:94650061-94650105                            | NM_008377:57       | Lrig1        | INSIDE                 | 0.467                                           | 0.722                            | 2034.01             | 1468.57             | 0.337                            | 1755.80             | 592.25              |
| A_68_P22391857 | chr3:104315282-104315333                          | NM_001025067:472   | Lrig2        | INSIDE                 | 0.154                                           | 0.657                            | 1835.53             | 1206.21             | 0.101                            | 1503.48             | 152.02              |
| A_68_P27528049 | chr10:125403615-125403659                         | NM_177152:362      | Lrig3        | INSIDE                 | 0.653                                           | 0.628                            | 1397.99             | 877.79              | 0.410                            | 1190.24             | 488.34              |
| A_68_P27536901 | chr10:127030734-127030787                         | NM_008512:27444    | Lrp1         | INSIDE                 | 0.629                                           | 2.985                            | 1284.50             | 3833.85             | 1.877                            | 943.04              | 1770.01             |
| A_68_P27536903 | chr10:127031018-127031062                         | NM_008512:27164    | Lrp1         | INSIDE                 | 0.652                                           | 2.582                            | 1667.49             | 4305.84             | 1.683                            | 1242.84             | 2091.36             |
| A_68_P29612545 | chr14:55082897-55082941                           | NM_022993:65       | Lrp10        | PROMOTER               | 0.492                                           | 0.465                            | 1962.67             | 912.81              | 0.229                            | 1527.36             | 349.52              |
| A_68_P21309972 | chr2:69423381-69423427                            | NM_001081088:720   | Lrp2         | INSIDE                 | 0.289                                           | 0.553                            | 1038.24             | 574.28              | 0.160                            | 761.29              | 121.55              |
| A_68_P21309978 | chr2:69424022-69424066                            | NM_001081088:80    | Lrp2         | INSIDE                 | 0.361                                           | 0.507                            | 1148.82             | 582.30              | 0.183                            | 912.84              | 166.90              |
| A_68_P21309980 | chr2:69424250-69424294                            | NM_001081088:148   | Lrp2         | PROMOTER               | 0.419                                           | 0.613                            | 2816.66             | 1727.82             | 0.257                            | 2232.51             | 574.45              |
| A_68_P23192850 | chr4:107475564-107475608                          | NM_001080926:723   | Lrp8         | INSIDE                 | 0.354                                           | 0.541                            | 1025.28             | 554.32              | 0.192                            | 940.55              | 180.21              |
| A_68_P23192855 | chr4:107476214-107476258                          | NM_001080926:1373  | Lrp8         | INSIDE                 | 0.185                                           | 0.344                            | 2441.43             | 840.11              | 0.064                            | 1828.68             | 116.58              |



| ProbeName      | Target position of probe on CpG island microarray | TargetID          | GeneSymbol | CpG island Description | Ratio of relative methylation (TiO2-NP/Vehicle) | Sham group                       |                     |                     | TiO <sub>2</sub> -H group        |                     |                     |
|----------------|---------------------------------------------------|-------------------|------------|------------------------|-------------------------------------------------|----------------------------------|---------------------|---------------------|----------------------------------|---------------------|---------------------|
|                |                                                   |                   |            |                        |                                                 | Relative methylation (Cy-5/Cy-3) | Cy-3 signal (Input) | Cy-5 signal (MeDIP) | Relative methylation (Cy-5/Cy-3) | Cy-3 signal (Input) | Cy-5 signal (MeDIP) |
| A_68_P23192856 | chr4:107476288-107476332                          | NM_001080926:1447 | Lrrp8      | INSIDE                 | 0.493                                           | 0.692                            | 1614.87             | 1117.23             | 0.341                            | 1128.58             | 385.27              |
| A_68_P23598367 | chr5:35448339-35448383                            | NM_013587:-14     | Lrrpap1    | PROMOTER               | 0.230                                           | 0.573                            | 1196.14             | 685.54              | 0.132                            | 920.87              | 121.64              |
| A_68_P23598368 | chr5:35448526-35448576                            | NM_013587:-204    | Lrrpap1    | PROMOTER               | 0.175                                           | 0.675                            | 1419.04             | 957.73              | 0.118                            | 968.39              | 114.65              |
| A_68_P31406961 | chr17:85189534-85189578                           | NM_028233:570     | Lrrpprc    | INSIDE                 | 0.651                                           | 0.624                            | 1016.38             | 634.34              | 0.407                            | 766.49              | 311.60              |
| A_68_P28513154 | chr12:70269870-70269914                           | NM_001081406:92   | Lrr1       | INSIDE                 | 0.360                                           | 0.440                            | 1601.40             | 703.86              | 0.158                            | 1276.28             | 202.13              |
| A_68_P28513155 | chr12:70269942-70269986                           | NM_001081406:164  | Lrr1       | INSIDE                 | 0.563                                           | 0.646                            | 1595.59             | 1030.61             | 0.364                            | 1213.98             | 441.28              |
| A_68_P30350131 | chr15:76541158-76541202                           | NM_145471:11      | Lrrc14     | INSIDE                 | 0.322                                           | 0.642                            | 2574.57             | 1652.84             | 0.207                            | 1800.54             | 372.39              |
| A_68_P26826863 | chr9:110856302-110856347                          | NM_028838:2276    | Lrrc2      | INSIDE                 | 0.432                                           | 0.537                            | 1024.14             | 549.76              | 0.232                            | 762.17              | 176.69              |
| A_68_P27180700 | chr10:60938374-60938418                           | NM_153542:-184    | Lrrc20     | PROMOTER               | 0.269                                           | 0.603                            | 1258.02             | 758.07              | 0.162                            | 994.79              | 161.06              |
| A_68_P30350168 | chr15:76546311-76546355                           | NM_198119:6271    | Lrrc24     | INSIDE                 | 0.419                                           | 0.423                            | 1576.40             | 666.84              | 0.177                            | 1146.32             | 203.17              |
| A_68_P30350212 | chr15:76553038-76553082                           | NM_198119:-457    | Lrrc24     | PROMOTER               | 0.366                                           | 0.490                            | 1781.72             | 873.53              | 0.180                            | 1217.47             | 218.75              |
| A_68_P25576399 | chr7:146398944-146398988                          | NM_001143755:-207 | Lrrc27     | PROMOTER               | 0.596                                           | 0.649                            | 991.03              | 643.50              | 0.387                            | 789.55              | 305.75              |
| A_68_P27270904 | chr10:77364916-77364963                           | NM_145152:342     | Lrrc3      | INSIDE                 | 0.505                                           | 0.572                            | 1069.92             | 612.22              | 0.289                            | 833.59              | 240.67              |
| A_68_P23374709 | chr4:142939818-142939864                          | NM_001162983:188  | Lrrc38     | INSIDE                 | 0.321                                           | 0.588                            | 916.58              | 538.54              | 0.188                            | 728.77              | 137.35              |
| A_68_P24322954 | chr6:28782175-28782219                            | NM_138682:-449    | Lrrc4      | PROMOTER               | 0.542                                           | 0.515                            | 1533.76             | 790.29              | 0.280                            | 1204.87             | 336.76              |
| A_68_P22683292 | chr3:157699623-157699667                          | NM_024194:-22     | Lrrc40     | DIVERGENT_PROMOTER     | 0.251                                           | 0.412                            | 2396.71             | 987.11              | 0.103                            | 1828.22             | 188.88              |
| A_68_P22683294 | chr3:157699823-157699867                          | NM_024194:178     | Lrrc40     | INSIDE                 | 0.560                                           | 0.487                            | 2499.03             | 1217.62             | 0.273                            | 2043.10             | 557.29              |
| A_68_P24055951 | chr5:123939417-123939461                          | NM_001033461:105  | Lrrc43     | INSIDE                 | 0.334                                           | 0.464                            | 2379.21             | 1103.66             | 0.155                            | 1826.63             | 283.02              |
| A_68_P28048328 | chr11:96902741-96902785                           | NM_027026:-79     | Lrrc46     | DIVERGENT_PROMOTER     | 0.363                                           | 0.485                            | 1848.56             | 896.38              | 0.176                            | 1751.10             | 308.14              |
| A_68_P26214833 | chr8:122099237-122099281                          | NM_026648:124     | Lrrc50     | INSIDE                 | 0.354                                           | 0.650                            | 2180.92             | 1416.83             | 0.230                            | 1885.31             | 433.04              |
| A_68_P25376177 | chr7:109082594-109082648                          | NM_001162973:-249 | Lrrc51     | PROMOTER               | 0.250                                           | 0.657                            | 1623.44             | 1066.72             | 0.164                            | 1236.97             | 202.92              |
| A_68_P25587299 | chr7:148380231-148380275                          | NM_153777:-789    | Lrrc56     | PROMOTER               | 0.140                                           | 0.608                            | 1949.57             | 1184.88             | 0.085                            | 1391.28             | 118.56              |
| A_68_P25587300 | chr7:148380302-148380347                          | NM_153777:-717    | Lrrc56     | PROMOTER               | 0.342                                           | 0.583                            | 3378.94             | 1968.59             | 0.199                            | 2386.53             | 474.93              |
| A_68_P21576250 | chr2:120434989-120435033                          | NM_025657:41      | Lrrc57     | INSIDE                 | 0.514                                           | 0.469                            | 1152.32             | 540.37              | 0.241                            | 995.00              | 239.74              |
| A_68_P30682961 | chr16:37869139-37869183                           | NM_177093:675     | Lrrc58     | INSIDE                 | 0.347                                           | 0.540                            | 2018.30             | 1088.96             | 0.187                            | 1581.02             | 295.65              |
| A_68_P28033987 | chr11:94490892-94490936                           | NM_133807:-223    | Lrrc59     | PROMOTER               | 0.346                                           | 0.467                            | 1648.54             | 769.91              | 0.162                            | 1465.96             | 236.99              |
| A_68_P28033990 | chr11:94491386-94491430                           | NM_133807:271     | Lrrc59     | INSIDE                 | 0.094                                           | 0.437                            | 4001.82             | 1747.53             | 0.041                            | 2873.50             | 118.49              |
| A_68_P24427997 | chr6:48504680-48504727                            | NM_001110160:-94  | Lrrc61     | PROMOTER               | 0.218                                           | 0.455                            | 1528.41             | 695.21              | 0.099                            | 1205.06             | 119.72              |
| A_68_P29726036 | chr14:75530896-75530940                           | NM_027581:-228    | Lrrc63     | DIVERGENT_PROMOTER     | 0.261                                           | 0.612                            | 1030.64             | 630.82              | 0.160                            | 946.64              | 151.42              |
| A_68_P20025036 | chr11:9957153-9957197                             | NM_145692:42027   | Lrrc67     | DOWNSTREAM             | 0.174                                           | 0.703                            | 1286.63             | 905.00              | 0.123                            | 993.52              | 121.82              |
| A_68_P20025044 | chr11:9958133-9958177                             | NM_145692:41047   | Lrrc67     | DOWNSTREAM             | 0.147                                           | 0.458                            | 2357.32             | 1079.34             | 0.067                            | 1700.36             | 114.20              |
| A_68_P24994037 | chr7:20147028-20147077                            | NM_199149:695     | Lrrc68     | INSIDE                 | 0.364                                           | 0.492                            | 1095.27             | 538.91              | 0.179                            | 832.16              | 149.23              |
| A_68_P24994044 | chr7:20147793-20147837                            | NM_199149:-67     | Lrrc68     | PROMOTER               | 0.346                                           | 0.375                            | 1459.04             | 547.60              | 0.130                            | 1273.98             | 165.40              |
| A_68_P23955160 | chr5:105845255-105845299                          | NM_001033550:483  | Lrrc8b     | INSIDE                 | 0.211                                           | 0.721                            | 3690.54             | 2661.87             | 0.152                            | 2789.03             | 423.94              |
| A_68_P23955793 | chr5:105948778-105948822                          | NM_133897:311     | Lrrc8c     | INSIDE                 | 0.213                                           | 0.481                            | 1484.06             | 714.32              | 0.103                            | 1271.43             | 130.44              |
| A_68_P23955794 | chr5:105948943-105948987                          | NM_133897:475     | Lrrc8c     | INSIDE                 | 0.280                                           | 0.579                            | 1273.90             | 737.70              | 0.162                            | 967.85              | 156.87              |
| A_68_P23956788 | chr5:106129546-106129590                          | NM_178701:-260    | Lrrc8d     | PROMOTER               | 0.123                                           | 0.655                            | 1992.46             | 1305.40             | 0.080                            | 1507.63             | 121.00              |
| A_68_P23956961 | chr5:106161428-106161472                          | NM_178701:31622   | Lrrc8d     | INSIDE                 | 0.292                                           | 1.627                            | 5444.91             | 8860.01             | 0.475                            | 3636.37             | 1726.04             |
| A_68_P21957225 | chr3:14533992-14534036                            | NM_001163579:227  | Lrrc1      | INSIDE                 | 0.602                                           | 0.606                            | 2893.89             | 1754.91             | 0.365                            | 2195.12             | 801.46              |
| A_68_P20440038 | chr11:92949235-92949279                           | NM_001111311:-764 | Lrrfip1    | PROMOTER               | 0.246                                           | 0.534                            | 1239.90             | 662.04              | 0.132                            | 1002.65             | 131.96              |
| A_68_P20440041 | chr11:92949532-92949576                           | NM_001111311:-466 | Lrrfip1    | PROMOTER               | 0.185                                           | 0.693                            | 1236.30             | 856.88              | 0.128                            | 963.01              | 123.18              |
| A_68_P26827665 | chr9:111020395-111020439                          | NM_001164838:-198 | Lrrfip2    | PROMOTER               | 0.202                                           | 0.716                            | 2023.28             | 1449.50             | 0.144                            | 1379.14             | 199.20              |
| A_68_P25187992 | chr7:73532448-73532492                            | NM_146191:757     | Lrrk1      | INSIDE                 | 0.308                                           | 0.500                            | 1378.83             | 690.10              | 0.154                            | 1171.14             | 180.40              |
| A_68_P25187998 | chr7:73533035-73533079                            | NM_146191:171     | Lrrk1      | INSIDE                 | 0.619                                           | 0.453                            | 2351.17             | 1064.01             | 0.280                            | 2026.61             | 567.49              |

| ProbeName      | Target position of probe on CpG island microarray | TargetID           | GeneSymbol | CpG island Description | Ratio of relative methylation (TiO2-NP/Vehicle) | Sham group                       |                     |                     | TiO <sub>2</sub> -H group        |                     |                     |
|----------------|---------------------------------------------------|--------------------|------------|------------------------|-------------------------------------------------|----------------------------------|---------------------|---------------------|----------------------------------|---------------------|---------------------|
|                |                                                   |                    |            |                        |                                                 | Relative methylation (Cy-5/Cy-3) | Cy-3 signal (Input) | Cy-5 signal (MeDIP) | Relative methylation (Cy-5/Cy-3) | Cy-3 signal (Input) | Cy-5 signal (MeDIP) |
| A_68_P24728933 | chr6:107479987-107480031                          | NM_008516:289      | Lrrn1      | INSIDE                 | 0.509                                           | 0.571                            | 2352.89             | 1344.39             | 0.291                            | 1889.07             | 549.00              |
| A_68_P20624273 | chr1:134776795-134776839                          | NM_010732:-115     | Lrrn2      | PROMOTER               | 0.240                                           | 0.656                            | 1544.42             | 1013.26             | 0.157                            | 1141.21             | 179.35              |
| A_68_P20624276 | chr1:134777196-134777240                          | NM_010732:287      | Lrrn2      | INSIDE                 | 0.544                                           | 0.629                            | 1327.89             | 835.28              | 0.342                            | 1101.54             | 376.70              |
| A_68_P21642726 | chr2:132704942-132704986                          | NM_177303:1634     | Lrrn4      | INSIDE                 | 0.156                                           | 0.508                            | 1990.75             | 1011.60             | 0.079                            | 1456.84             | 115.15              |
| A_68_P24563510 | chr6:77193700-77193744                            | NM_028880:1012     | Lrrtm1     | INSIDE                 | 0.305                                           | 0.625                            | 2735.05             | 1709.24             | 0.191                            | 2116.18             | 403.91              |
| A_68_P24563511 | chr6:77193808-77193857                            | NM_028880:1122     | Lrrtm1     | INSIDE                 | 0.297                                           | 0.467                            | 1187.23             | 554.94              | 0.139                            | 858.30              | 119.33              |
| A_68_P24563513 | chr6:77193982-77194026                            | NM_028880:1294     | Lrrtm1     | INSIDE                 | 0.177                                           | 0.457                            | 1945.42             | 888.59              | 0.081                            | 1482.37             | 119.94              |
| A_68_P24563520 | chr6:77194801-77194845                            | NM_028880:2112     | Lrrtm1     | INSIDE                 | 0.229                                           | 0.567                            | 1769.99             | 1003.29             | 0.130                            | 1170.13             | 152.11              |
| A_68_P24792499 | chr6:119280504-119280548                          | NM_001172207:-1304 | Lrrtm2     | PROMOTER               | 0.396                                           | 0.523                            | 1726.40             | 903.05              | 0.207                            | 1158.45             | 239.74              |
| A_68_P24119630 | chr5:136611720-136611770                          | NM_027891:200      | Lrwd1      | INSIDE                 | 0.219                                           | 0.670                            | 2503.87             | 1678.03             | 0.147                            | 1750.50             | 256.69              |
| A_68_P24119632 | chr5:136611907-136611951                          | NM_027891:16       | Lrwd1      | INSIDE                 | 0.180                                           | 0.435                            | 2165.95             | 942.65              | 0.078                            | 1614.95             | 126.51              |
| A_68_P24119634 | chr5:136612073-136612117                          | NM_027891:-150     | Lrwd1      | DIVERGENT_PROMOTER     | 0.246                                           | 0.500                            | 1502.65             | 751.90              | 0.123                            | 1087.69             | 133.96              |
| A_68_P23278139 | chr4:125773830-125773874                          | NM_001163266:-44   | Lsm10      | PROMOTER               | 0.428                                           | 0.502                            | 1899.41             | 953.03              | 0.215                            | 1425.24             | 306.22              |
| A_68_P27765087 | chr1:45757827-45757871                            | NM_028185:589      | Lsm11      | INSIDE                 | 0.513                                           | 0.548                            | 1017.78             | 557.34              | 0.281                            | 781.41              | 219.55              |
| A_68_P27765088 | chr1:45757957-45758001                            | NM_028185:459      | Lsm11      | INSIDE                 | 0.242                                           | 0.377                            | 1609.20             | 606.79              | 0.091                            | 1316.93             | 120.41              |
| A_68_P27765091 | chr1:45758223-45758267                            | NM_028185:193      | Lsm11      | INSIDE                 | 0.573                                           | 0.376                            | 1929.95             | 725.05              | 0.215                            | 1567.62             | 337.36              |
| A_68_P21900915 | chr2:179759580-179759624                          | NM_177727:-89      | Lsm14b     | PROMOTER               | 0.607                                           | 0.659                            | 901.20              | 593.66              | 0.400                            | 874.32              | 349.57              |
| A_68_P31156873 | chr17:35118675-35118726                           | NM_001204274:-98   | Lsm2       | PROMOTER               | 0.343                                           | 0.633                            | 1144.79             | 724.59              | 0.217                            | 836.98              | 181.68              |
| A_68_P31156874 | chr17:35118802-35118846                           | NM_001204273:-250  | Lsm2       | PROMOTER               | 0.286                                           | 0.428                            | 2081.23             | 890.56              | 0.122                            | 1752.74             | 214.56              |
| A_68_P31156878 | chr17:35119267-35119311                           | NM_001204273:214   | Lsm2       | INSIDE                 | 0.211                                           | 0.426                            | 2163.90             | 921.01              | 0.090                            | 1727.66             | 155.21              |
| A_68_P24639527 | chr6:91466074-91466119                            | NM_026309:68       | Lsm3       | INSIDE                 | 0.214                                           | 0.481                            | 1591.63             | 765.80              | 0.103                            | 1182.52             | 121.51              |
| A_68_P25953303 | chr8:73197017-73197061                            | NM_015816:-91      | Lsm4       | PROMOTER               | 0.190                                           | 0.633                            | 3049.94             | 1931.25             | 0.120                            | 2058.76             | 247.77              |
| A_68_P27285906 | chr10:80317819-80317863                           | NM_025349:114      | Lsm7       | INSIDE                 | 0.500                                           | 0.562                            | 964.30              | 541.89              | 0.281                            | 725.20              | 203.91              |
| A_68_P27353694 | chr10:92916374-92916418                           | NM_008517:256      | Lta4h      | INSIDE                 | 0.281                                           | 0.461                            | 1176.69             | 542.62              | 0.130                            | 913.09              | 118.37              |
| A_68_P31158189 | chr17:35332625-35332669                           | NM_008518:1195     | Ltb        | INSIDE                 | 0.267                                           | 0.396                            | 1615.19             | 639.59              | 0.106                            | 1192.92             | 126.15              |
| A_68_P31158190 | chr17:35332751-35332795                           | NM_008518:1321     | Ltb        | INSIDE                 | 0.512                                           | 0.484                            | 1166.87             | 564.21              | 0.248                            | 895.35              | 221.65              |
| A_68_P31930561 | chr19:5742058-5742102                             | NM_008520:1177     | Ltbp3      | INSIDE                 | 0.463                                           | 0.603                            | 951.02              | 573.22              | 0.279                            | 751.16              | 209.65              |
| A_68_P25016713 | chr7:28114386-28114430                            | NM_001113549:4259  | Ltbp4      | INSIDE                 | 0.550                                           | 0.724                            | 1877.58             | 1359.86             | 0.398                            | 1365.19             | 543.97              |
| A_68_P25016725 | chr7:28115897-28115945                            | NM_001113549:2747  | Ltbp4      | INSIDE                 | 0.558                                           | 0.616                            | 1201.99             | 740.92              | 0.344                            | 1039.46             | 357.39              |
| A_68_P21571366 | chr2:119584202-119584246                          | NM_008523:37       | Ltk        | INSIDE                 | 0.570                                           | 0.636                            | 1211.98             | 771.39              | 0.363                            | 1037.16             | 376.53              |
| A_68_P21571367 | chr2:119584322-119584366                          | NM_008523:-83      | Ltk        | PROMOTER               | 0.397                                           | 0.476                            | 1630.05             | 775.10              | 0.189                            | 1333.23             | 251.49              |
| A_68_P30939710 | chr16:87432281-87432325                           | NM_001081068:549   | Ltn1       | INSIDE                 | 0.366                                           | 0.682                            | 1974.27             | 1347.44             | 0.250                            | 1663.64             | 415.75              |
| A_68_P31109175 | chr17:26390511-26390556                           | NM_025881:679      | Luc71      | INSIDE                 | 0.153                                           | 0.671                            | 1465.52             | 983.62              | 0.103                            | 1192.28             | 122.58              |
| A_68_P24377897 | chr6:38501394-38501438                            | NM_001170849:-27   | Luc712     | PROMOTER               | 0.467                                           | 0.536                            | 2359.55             | 1265.25             | 0.250                            | 2165.71             | 541.85              |
| A_68_P28032108 | chr11:94182771-94182815                           | NM_026313:433      | Luc713     | INSIDE                 | 0.328                                           | 1.743                            | 7729.97             | 13474.87            | 0.571                            | 4792.05             | 2736.04             |
| A_68_P28032110 | chr11:94183065-94183109                           | NM_026313:139      | Luc713     | INSIDE                 | 0.532                                           | 0.714                            | 1852.21             | 1323.37             | 0.380                            | 1152.22             | 438.26              |
| A_68_P28032111 | chr11:94183206-94183250                           | NM_026313:-3       | Luc713     | DIVERGENT_PROMOTER     | 0.383                                           | 0.581                            | 1257.23             | 730.56              | 0.223                            | 890.55              | 198.18              |
| A_68_P23334048 | chr4:136018725-136018769                          | NM_024452:-6929    | Luzp1      | PROMOTER               | 0.277                                           | 0.553                            | 1038.17             | 573.81              | 0.153                            | 789.09              | 120.97              |
| A_68_P22210126 | chr3:67267629-67267673                            | NM_016753:179      | Lxn        | INSIDE                 | 0.131                                           | 1.604                            | 3191.32             | 5120.21             | 0.210                            | 2275.08             | 476.80              |
| A_68_P22210127 | chr3:67267701-67267745                            | NM_016753:107      | Lxn        | INSIDE                 | 0.157                                           | 1.760                            | 6664.05             | 11727.54            | 0.276                            | 4566.69             | 1259.04             |
| A_68_P30340467 | chr15:74786292-74786336                           | NM_001164040:779   | Ly6e       | INSIDE                 | 0.282                                           | 0.517                            | 1075.37             | 555.47              | 0.146                            | 812.49              | 118.44              |
| A_68_P21258085 | chr2:60221190-60221234                            | NM_013825:76       | Ly75       | INSIDE                 | 0.317                                           | 0.518                            | 3628.14             | 1880.21             | 0.164                            | 2695.63             | 442.78              |
| A_68_P26021275 | chr8:87229477-87229521                            | NM_008535:4143     | Ly11       | DOWNSTREAM             | 0.268                                           | 1.834                            | 5704.28             | 10461.67            | 0.492                            | 3414.91             | 1680.44             |
| A_68_P22693714 | chr4:3605437-3605481                              | NM_001111096:191   | Lyn        | INSIDE                 | 0.565                                           | 0.542                            | 1002.80             | 543.31              | 0.306                            | 827.53              | 253.41              |

| ProbeName      | Target position of probe on CpG island microarray | TargetID           | GeneSymbol | CpG island Description | Ratio of relative methylation (TiO2-NP/Vehicle) | Sham group                       |                     |                     | TiO <sub>2</sub> -H group        |                     |                     |
|----------------|---------------------------------------------------|--------------------|------------|------------------------|-------------------------------------------------|----------------------------------|---------------------|---------------------|----------------------------------|---------------------|---------------------|
|                |                                                   |                    |            |                        |                                                 | Relative methylation (Cy-5/Cy-3) | Cy-3 signal (Input) | Cy-5 signal (MeDIP) | Relative methylation (Cy-5/Cy-3) | Cy-3 signal (Input) | Cy-5 signal (MeDIP) |
| A_68_P20587181 | chr1:127808737-127808781                          | NM_145100:33       | Lypd1      | INSIDE                 | 0.099                                           | 1.824                            | 2114.75             | 3858.07             | 0.181                            | 1318.43             | 239.07              |
| A_68_P23331511 | chr4:135528428-135528472                          | NM_011942:59       | Lypla2     | INSIDE                 | 0.392                                           | 0.473                            | 1769.63             | 837.26              | 0.185                            | 1552.06             | 287.58              |
| A_68_P20905055 | chr1:187941024-187941068                          | NM_146106:143      | Lyplal1    | INSIDE                 | 0.519                                           | 0.471                            | 2071.17             | 974.55              | 0.244                            | 1586.16             | 387.40              |
| A_68_P22823553 | chr4:32887074-32887124                            | NM_175364:-135     | Lym2       | PROMOTER               | 0.439                                           | 0.454                            | 1133.03             | 514.86              | 0.200                            | 944.85              | 188.67              |
| A_68_P27812424 | chr11:54674270-54674317                           | NM_029327:-200     | Lym7       | DIVERGENT_PROMOTER     | 0.201                                           | 0.614                            | 1145.31             | 703.43              | 0.123                            | 973.58              | 120.06              |
| A_68_P28834522 | chr13:13682471-13682515                           | NM_010748:-183     | Lyst       | PROMOTER               | 0.161                                           | 0.482                            | 2052.21             | 988.96              | 0.078                            | 1560.66             | 121.27              |
| A_68_P26884585 | chr9:121550768-121550812                          | NM_026915:-106     | Lyzl4      | DIVERGENT_PROMOTER     | 0.392                                           | 0.586                            | 1165.46             | 682.57              | 0.229                            | 885.62              | 203.12              |
| A_68_P26884586 | chr9:121550854-121550898                          | NM_026915:-192     | Lyzl4      | DIVERGENT_PROMOTER     | 0.296                                           | 0.488                            | 2617.71             | 1278.25             | 0.145                            | 1836.94             | 265.46              |
| A_68_P26884587 | chr9:121550968-121551014                          | NM_026915:-306     | Lyzl4      | DIVERGENT_PROMOTER     | 0.134                                           | 0.413                            | 3297.10             | 1363.09             | 0.055                            | 2095.23             | 115.81              |
| A_68_P26884588 | chr9:121551071-121551115                          | NM_026915:-408     | Lyzl4      | DIVERGENT_PROMOTER     | 0.244                                           | 0.645                            | 1522.36             | 981.64              | 0.158                            | 1127.33             | 177.62              |
| A_68_P23400758 | chr4:148859457-148859501                          | NM_026963:37       | Lzic       | INSIDE                 | 0.252                                           | 0.559                            | 1110.84             | 621.30              | 0.141                            | 857.81              | 120.70              |
| A_68_P26896522 | chr9:123626490-123626534                          | NM_033322:163      | Lztlf1     | INSIDE                 | 0.209                                           | 0.509                            | 1557.42             | 793.18              | 0.106                            | 1194.78             | 127.24              |
| A_68_P32135887 | chr19:45090142-45090186                           | NM_001130526:-2460 | Lzts2      | PROMOTER               | 0.412                                           | 0.691                            | 1347.91             | 930.96              | 0.285                            | 1100.25             | 313.42              |
| A_68_P22303234 | chr3:86350689-86350733                            | NM_011839:1495     | Mab2112    | INSIDE                 | 0.371                                           | 0.692                            | 3024.69             | 2091.84             | 0.257                            | 2148.70             | 552.00              |
| A_68_P22303238 | chr3:86351126-86351170                            | NM_011839:1057     | Mab2112    | INSIDE                 | 0.658                                           | 0.321                            | 1866.19             | 598.95              | 0.211                            | 1307.52             | 276.08              |
| A_68_P22303239 | chr3:86351242-86351286                            | NM_011839:941      | Mab2112    | INSIDE                 | 0.492                                           | 0.598                            | 1614.71             | 964.91              | 0.294                            | 1195.95             | 351.85              |
| A_68_P31938325 | chr19:7240713-7240757                             | NM_134147:109477   | Macrodl    | INSIDE                 | 0.494                                           | 0.601                            | 1881.54             | 1131.71             | 0.297                            | 1393.49             | 413.83              |
| A_68_P21683843 | chr2:140221161-140221205                          | NM_028387:12       | Macrodl2   | INSIDE                 | 0.270                                           | 0.509                            | 1963.27             | 1000.00             | 0.138                            | 1607.61             | 221.42              |
| A_68_P24517586 | chr6:66485635-66485679                            | NM_019499:195      | Mad211     | INSIDE                 | 0.301                                           | 0.648                            | 1159.02             | 751.05              | 0.195                            | 1025.09             | 199.61              |
| A_68_P23588230 | chr5:33678025-33678069                            | NM_021500:-174     | Maea       | PROMOTER               | 0.286                                           | 0.374                            | 1878.77             | 703.16              | 0.107                            | 1386.19             | 148.30              |
| A_68_P23588231 | chr5:33678100-33678145                            | NM_021500:-98      | Maea       | PROMOTER               | 0.335                                           | 0.614                            | 2204.00             | 1352.69             | 0.206                            | 1881.81             | 387.36              |
| A_68_P20799114 | chr1:168169051-168169095                          | NM_175296:-197     | Mael       | PROMOTER               | 0.555                                           | 3.213                            | 4234.87             | 13605.29            | 1.784                            | 3466.50             | 6184.25             |
| A_68_P20799115 | chr1:168169115-168169174                          | NM_175296:-269     | Mael       | PROMOTER               | 0.507                                           | 5.741                            | 186.23              | 1069.13             | 2.909                            | 135.52              | 394.29              |
| A_68_P26192671 | chr8:118229614-118229663                          | NM_001025577:1156  | Maf        | INSIDE                 | 0.279                                           | 0.518                            | 2078.13             | 1076.01             | 0.144                            | 1552.88             | 224.28              |
| A_68_P26192682 | chr8:118231333-118231382                          | NM_001025577:-563  | Maf        | PROMOTER               | 0.274                                           | 0.531                            | 1446.93             | 768.66              | 0.146                            | 1192.45             | 173.59              |
| A_68_P26192689 | chr8:118232168-118232225                          | NM_001025577:-1402 | Maf        | PROMOTER               | 0.192                                           | 0.462                            | 1766.37             | 816.22              | 0.089                            | 1352.51             | 119.73              |
| A_68_P30347740 | chr15:76181682-76181726                           | NM_001164607:-19   | Maf1       | DIVERGENT_PROMOTER     | 0.084                                           | 1.888                            | 4164.69             | 7864.25             | 0.159                            | 2780.52             | 442.59              |
| A_68_P30347741 | chr15:76181792-76181836                           | NM_001164607:91    | Maf1       | INSIDE                 | 0.287                                           | 1.738                            | 3682.37             | 6398.89             | 0.498                            | 2466.15             | 1228.36             |
| A_68_P30347742 | chr15:76181910-76181954                           | NM_001164607:209   | Maf1       | INSIDE                 | 0.314                                           | 0.671                            | 1461.02             | 980.13              | 0.211                            | 1140.91             | 240.20              |
| A_68_P21794484 | chr2:160191502-160191546                          | NM_010658:1277     | Mafb       | INSIDE                 | 0.239                                           | 0.575                            | 1209.16             | 695.07              | 0.137                            | 908.40              | 124.75              |
| A_68_P21794488 | chr2:160191953-160191997                          | NM_010658:827      | Mafb       | INSIDE                 | 0.306                                           | 0.551                            | 2432.00             | 1340.48             | 0.168                            | 1838.20             | 309.53              |
| A_68_P21794498 | chr2:160193025-160193069                          | NM_010658:-245     | Mafb       | PROMOTER               | 0.356                                           | 0.738                            | 4337.06             | 3202.29             | 0.263                            | 3253.79             | 855.16              |
| A_68_P30365874 | chr15:79178468-79178512                           | NM_010755:383      | Maff       | INSIDE                 | 0.280                                           | 1.627                            | 4199.84             | 6834.63             | 0.455                            | 2838.74             | 1291.98             |
| A_68_P30365876 | chr15:79178645-79178689                           | NM_010755:559      | Maff       | INSIDE                 | 0.056                                           | 0.744                            | 4402.30             | 3275.28             | 0.041                            | 2943.95             | 121.66              |
| A_68_P24137624 | chr5:140267260-140267304                          | NM_010757:-207     | Mafk       | PROMOTER               | 0.147                                           | 0.617                            | 1768.63             | 1091.14             | 0.091                            | 1360.91             | 123.35              |
| A_68_P24137625 | chr5:140267376-140267420                          | NM_010757:-91      | Mafk       | PROMOTER               | 0.234                                           | 0.548                            | 8056.66             | 4414.12             | 0.128                            | 5679.47             | 727.79              |
| A_68_P21583616 | chr2:121781508-121781552                          | NM_008545:298      | Mageb3     | INSIDE                 | 0.179                                           | 0.561                            | 2686.96             | 1508.04             | 0.100                            | 1953.02             | 196.18              |
| A_68_P32539359 | chrX:91786297-91786345                            | NM_019791:1093     | Maged1     | INSIDE                 | 0.110                                           | 2.611                            | 1501.58             | 3920.54             | 0.287                            | 566.67              | 162.83              |
| A_68_P32539360 | chrX:91786471-91786515                            | NM_019791:921      | Maged1     | INSIDE                 | 0.191                                           | 1.882                            | 1482.38             | 2789.20             | 0.359                            | 567.37              | 203.64              |
| A_68_P32539363 | chrX:91786834-91786878                            | NM_019791:557      | Maged1     | INSIDE                 | 0.214                                           | 1.969                            | 2039.95             | 4016.39             | 0.422                            | 861.74              | 363.89              |
| A_68_P32539365 | chrX:91787127-91787171                            | NM_019791:265      | Maged1     | INSIDE                 | 0.290                                           | 1.612                            | 4543.27             | 7325.31             | 0.468                            | 1646.10             | 770.57              |
| A_68_P32742984 | chrX:147247606-147247650                          | NM_001199246:618   | Maged2     | INSIDE                 | 0.219                                           | 2.249                            | 3314.50             | 7454.73             | 0.492                            | 1228.13             | 604.81              |
| A_68_P32742985 | chrX:147247678-147247726                          | NM_001199246:544   | Maged2     | INSIDE                 | 0.037                                           | 3.682                            | 2465.96             | 9080.68             | 0.135                            | 876.03              | 117.91              |
| A_68_P24655997 | chr6:94232874-94232918                            | NM_001029850:1002  | Magi1      | INSIDE                 | 0.264                                           | 0.504                            | 1466.14             | 739.50              | 0.133                            | 1225.95             | 163.36              |

| ProbeName      | Target position of probe on CpG island microarray | TargetID          | GeneSymbol | CpG island Description | Ratio of relative methylation (TiO2-NP/Vehicle) | Sham group                       |                     |                     | TiO <sub>2</sub> -H group        |                     |                     |
|----------------|---------------------------------------------------|-------------------|------------|------------------------|-------------------------------------------------|----------------------------------|---------------------|---------------------|----------------------------------|---------------------|---------------------|
|                |                                                   |                   |            |                        |                                                 | Relative methylation (Cy-5/Cy-3) | Cy-3 signal (Input) | Cy-5 signal (MeDIP) | Relative methylation (Cy-5/Cy-3) | Cy-3 signal (Input) | Cy-5 signal (MeDIP) |
| A_68_P24655998 | chr6:94232997-94233041                            | NM_001029850:880  | Magi1      | INSIDE                 | 0.245                                           | 0.606                            | 946.93              | 573.81              | 0.148                            | 867.92              | 128.81              |
| A_68_P24656010 | chr6:94234328-94234372                            | NM_001029850:452  | Magi1      | PROMOTER               | 0.108                                           | 0.583                            | 2365.89             | 1378.76             | 0.063                            | 1820.99             | 114.56              |
| A_68_P23513995 | chr5:18733341-18733385                            | NM_001170746:499  | Magi2      | INSIDE                 | 0.445                                           | 0.584                            | 1843.20             | 1076.15             | 0.260                            | 1232.77             | 320.52              |
| A_68_P23193385 | chr4:107552379-107552423                          | NM_010760:-17     | Magoh      | PROMOTER               | 0.344                                           | 0.587                            | 1208.40             | 708.95              | 0.202                            | 918.58              | 185.23              |
| A_68_P25756476 | chr8:32278992-32279036                            | NM_026453:182     | Mak16      | INSIDE                 | 0.383                                           | 0.614                            | 1140.32             | 699.86              | 0.235                            | 959.02              | 225.20              |
| A_68_P25756477 | chr8:32279067-32279111                            | NM_026453:108     | Mak16      | INSIDE                 | 0.356                                           | 0.664                            | 1383.78             | 919.33              | 0.237                            | 1017.34             | 240.89              |
| A_68_P21614869 | chr2:127481863-127481907                          | NM_001171187:547  | Mal        | INSIDE                 | 0.456                                           | 0.626                            | 1145.91             | 717.62              | 0.286                            | 964.41              | 275.64              |
| A_68_P31930911 | chr19:5803095-5803139                             | NR_002847:-445    | Malat1     | PROMOTER               | 0.275                                           | 0.622                            | 946.67              | 589.23              | 0.171                            | 703.84              | 120.52              |
| A_68_P31930913 | chr19:5803254-5803298                             | NR_002847:-605    | Malat1     | PROMOTER               | 0.249                                           | 0.365                            | 1861.18             | 679.93              | 0.091                            | 1271.31             | 115.83              |
| A_68_P27787816 | chr11:50105944-50105992                           | NM_175334:-130    | Maml1      | PROMOTER               | 0.279                                           | 0.611                            | 864.37              | 528.36              | 0.171                            | 704.18              | 120.09              |
| A_68_P27787817 | chr11:50106087-50106131                           | NM_175334:-270    | Maml1      | PROMOTER               | 0.336                                           | 0.529                            | 1025.84             | 543.18              | 0.178                            | 817.07              | 145.50              |
| A_68_P22133744 | chr3:51906476-51906520                            | NM_001004176:2430 | Maml3      | INSIDE                 | 0.351                                           | 0.675                            | 1006.00             | 679.14              | 0.237                            | 777.73              | 184.13              |
| A_68_P22133753 | chr3:51907587-51907631                            | NM_001004176:1320 | Maml3      | INSIDE                 | 0.229                                           | 0.492                            | 2548.76             | 1253.29             | 0.112                            | 1797.82             | 202.21              |
| A_68_P32451587 | chrX:68303129-68303173                            | NM_001081354:-280 | Maml1d1    | PROMOTER               | 0.159                                           | 2.534                            | 1396.22             | 3538.14             | 0.403                            | 613.24              | 247.39              |
| A_68_P31296465 | chr17:64951073-64951117                           | NM_008549:106     | Man2a1     | INSIDE                 | 0.241                                           | 0.465                            | 1684.05             | 783.28              | 0.112                            | 1390.37             | 155.69              |
| A_68_P25266321 | chr7:87515732-87515779                            | NM_172903:506     | Man2a2     | INSIDE                 | 0.180                                           | 0.695                            | 2106.99             | 1463.86             | 0.125                            | 1410.98             | 176.06              |
| A_68_P25266322 | chr7:87515822-87515866                            | NM_172903:417     | Man2a2     | INSIDE                 | 0.191                                           | 0.681                            | 4472.38             | 3046.27             | 0.130                            | 3535.23             | 458.91              |
| A_68_P22552361 | chr3:135148732-135148776                          | NM_027288:180     | Manba      | INSIDE                 | 0.318                                           | 0.553                            | 1312.87             | 725.90              | 0.176                            | 1150.75             | 202.41              |
| A_68_P22793477 | chr4:26273660-26273704                            | NM_172865:117     | Manea      | INSIDE                 | 0.214                                           | 0.522                            | 2042.56             | 1066.96             | 0.112                            | 1569.08             | 175.51              |
| A_68_P22793478 | chr4:26273773-26273817                            | NM_172865:5       | Manea      | INSIDE                 | 0.649                                           | 0.589                            | 2829.43             | 1667.16             | 0.383                            | 2197.29             | 840.60              |
| A_68_P22793479 | chr4:26273870-26273915                            | NM_172865:-93     | Manea      | PROMOTER               | 0.259                                           | 0.636                            | 2350.69             | 1495.72             | 0.165                            | 1838.38             | 302.63              |
| A_68_P23270752 | chr4:124539019-124539063                          | NM_001007573:375  | Maneal     | INSIDE                 | 0.358                                           | 0.505                            | 1459.73             | 736.51              | 0.181                            | 1129.54             | 203.96              |
| A_68_P26805729 | chr9:106793805-106793862                          | NM_029103:436     | Manf       | INSIDE                 | 0.150                                           | 0.695                            | 1621.48             | 1126.14             | 0.104                            | 1165.93             | 121.60              |
| A_68_P26805730 | chr9:106793972-106794020                          | NM_029103:273     | Manf       | INSIDE                 | 0.162                                           | 0.726                            | 1691.90             | 1229.03             | 0.117                            | 1236.20             | 145.19              |
| A_68_P26805732 | chr9:106794296-106794340                          | NM_029103:-49     | Manf       | PROMOTER               | 0.314                                           | 0.556                            | 969.69              | 538.82              | 0.174                            | 714.03              | 124.51              |
| A_68_P32276229 | chrX:16195746-16195790                            | NM_173740:-1055   | Maoa       | PROMOTER               | 0.374                                           | 0.575                            | 1194.71             | 687.20              | 0.215                            | 536.94              | 115.36              |
| A_68_P26227605 | chr8:124109328-124109378                          | NM_026160:-5015   | Map11c3b   | DIVERGENT_PROMOTER     | 0.272                                           | 0.591                            | 995.82              | 588.63              | 0.161                            | 733.41              | 118.12              |
| A_68_P26227607 | chr8:124109628-124109679                          | NM_026160:-4714   | Map11c3b   | DIVERGENT_PROMOTER     | 0.265                                           | 0.620                            | 943.16              | 584.78              | 0.164                            | 724.21              | 118.92              |
| A_68_P26227629 | chr8:124114089-124114133                          | NM_026160:-257    | Map11c3b   | PROMOTER               | 0.203                                           | 0.467                            | 1645.46             | 768.07              | 0.095                            | 1245.84             | 117.86              |
| A_68_P26580968 | chr9:64100873-64100917                            | NM_008927:518     | Map2k1     | INSIDE                 | 0.152                                           | 0.433                            | 2290.58             | 991.80              | 0.066                            | 1770.03             | 116.82              |
| A_68_P26580975 | chr9:64101634-64101678                            | NM_008927:-244    | Map2k1     | PROMOTER               | 0.262                                           | 0.690                            | 1916.99             | 1322.23             | 0.181                            | 1631.38             | 295.05              |
| A_68_P27287421 | chr10:80568903-80568947                           | NM_023138:233     | Map2k2     | INSIDE                 | 0.306                                           | 0.460                            | 1148.19             | 528.02              | 0.141                            | 830.12              | 116.64              |
| A_68_P27845569 | chr11:60745467-60745511                           | NM_008928:-70     | Map2k3     | DIVERGENT_PROMOTER     | 0.646                                           | 0.328                            | 1578.99             | 517.62              | 0.212                            | 1136.75             | 240.67              |
| A_68_P25616729 | chr8:4238967-4239011                              | NM_001042557:249  | Map2k7     | INSIDE                 | 0.404                                           | 0.580                            | 2908.83             | 1687.64             | 0.234                            | 2062.11             | 483.10              |
| A_68_P29330805 | chr13:112598506-112598550                         | NM_011945:663     | Map3k1     | INSIDE                 | 0.359                                           | 0.432                            | 2163.06             | 934.12              | 0.155                            | 1715.14             | 265.84              |
| A_68_P31930244 | chr19:5696279-5696323                             | NM_022012:7170    | Map3k11    | INSIDE                 | 0.214                                           | 0.664                            | 1221.58             | 811.28              | 0.142                            | 884.26              | 125.39              |
| A_68_P30498285 | chr15:102340830-102340876                         | NM_001163643:6583 | Map3k12    | INSIDE                 | 0.294                                           | 0.625                            | 860.46              | 537.87              | 0.183                            | 666.50              | 122.30              |
| A_68_P30498330 | chr15:102347068-102347112                         | NM_001163643:345  | Map3k12    | INSIDE                 | 0.400                                           | 1.500                            | 2499.08             | 3748.29             | 0.600                            | 1607.42             | 964.83              |
| A_68_P30498333 | chr15:102347359-102347404                         | NM_001163643:54   | Map3k12    | INSIDE                 | 0.347                                           | 0.557                            | 1772.33             | 987.48              | 0.193                            | 1335.19             | 258.25              |
| A_68_P28084316 | chr11:103128366-103128410                         | NM_016896:327     | Map3k14    | INSIDE                 | 0.315                                           | 0.533                            | 2663.72             | 1420.95             | 0.168                            | 1903.82             | 320.35              |
| A_68_P28084317 | chr11:103128474-103128518                         | NM_016896:219     | Map3k14    | INSIDE                 | 0.430                                           | 0.677                            | 2901.94             | 1963.69             | 0.291                            | 2093.48             | 609.49              |
| A_68_P28084319 | chr11:103128781-103128825                         | NM_016896:-87     | Map3k14    | PROMOTER               | 0.430                                           | 0.489                            | 1810.48             | 884.93              | 0.210                            | 1355.08             | 284.85              |
| A_68_P28084320 | chr11:103128905-103128949                         | NM_016896:-211    | Map3k14    | PROMOTER               | 0.257                                           | 0.471                            | 1406.35             | 662.20              | 0.121                            | 996.05              | 120.57              |
| A_68_P32777675 | chrX:156426686-156426730                          | NM_001163085:344  | Map3k15    | INSIDE                 | 0.186                                           | 1.497                            | 772.35              | 1155.89             | 0.278                            | 431.33              | 119.92              |

| ProbeName      | Target position of probe on CpG island microarray | TargetID            | GeneSymbol | CpG island Description | Ratio of relative methylation (TiO2-NP/Vehicle) | Sham group                       |                     |                     | TiO <sub>2</sub> -H group        |                     |                     |
|----------------|---------------------------------------------------|---------------------|------------|------------------------|-------------------------------------------------|----------------------------------|---------------------|---------------------|----------------------------------|---------------------|---------------------|
|                |                                                   |                     |            |                        |                                                 | Relative methylation (Cy-5/Cy-3) | Cy-3 signal (Input) | Cy-5 signal (MeDIP) | Relative methylation (Cy-5/Cy-3) | Cy-3 signal (Input) | Cy-5 signal (MeDIP) |
| A_68_P31601524 | chr18:32323271-32323316                           | NM_011946:551       | Map3k2     | INSIDE                 | 0.401                                           | 0.591                            | 1415.59             | 837.13              | 0.237                            | 1152.26             | 273.12              |
| A_68_P31051124 | chr17:12511856-12511901                           | NM_011948:-352      | Map3k4     | PROMOTER               | 0.660                                           | 0.508                            | 1315.65             | 668.69              | 0.335                            | 1125.73             | 377.64              |
| A_68_P22818617 | chr4:32050724-32050768                            | NM_009316:-335      | Map3k7     | PROMOTER               | 0.408                                           | 0.377                            | 1924.93             | 726.34              | 0.154                            | 1466.92             | 225.63              |
| A_68_P22818618 | chr4:32050821-32050865                            | NM_009316:-239      | Map3k7     | PROMOTER               | 0.572                                           | 0.362                            | 2234.04             | 809.83              | 0.207                            | 1848.73             | 383.14              |
| A_68_P31462759 | chr18:4353279-4353323                             | NM_007746:-349      | Map3k8     | PROMOTER               | 0.316                                           | 0.508                            | 2271.95             | 1155.14             | 0.161                            | 1776.76             | 285.32              |
| A_68_P31934085 | chr19:6341468-6341512                             | NM_009006:241       | Map4k2     | INSIDE                 | 0.486                                           | 0.671                            | 1478.67             | 992.70              | 0.326                            | 1237.50             | 403.43              |
| A_68_P31383812 | chr17:80976478-80976522                           | NM_001081357:150933 | Map4k3     | DOWNSTREAM             | 0.663                                           | 0.648                            | 1188.54             | 770.31              | 0.430                            | 947.73              | 407.50              |
| A_68_P30423458 | chr15:88977331-88977375                           | NM_011161:2684      | Mapk11     | INSIDE                 | 0.206                                           | 0.627                            | 1094.51             | 686.24              | 0.129                            | 926.20              | 119.72              |
| A_68_P30423403 | chr15:88970637-88970681                           | NM_013871:475       | Mapk12     | INSIDE                 | 0.459                                           | 0.565                            | 1890.77             | 1067.54             | 0.259                            | 1426.09             | 369.87              |
| A_68_P30423406 | chr15:88971030-88971074                           | NM_013871:81        | Mapk12     | INSIDE                 | 0.281                                           | 0.716                            | 2592.92             | 1857.68             | 0.201                            | 1804.08             | 363.14              |
| A_68_P30423408 | chr15:88971259-88971303                           | NM_013871:-147      | Mapk12     | PROMOTER               | 0.151                                           | 0.661                            | 1607.55             | 1062.25             | 0.100                            | 1190.75             | 118.98              |
| A_68_P30345342 | chr15:75824398-75824446                           | NM_177922:224       | Mapk15     | INSIDE                 | 0.242                                           | 0.550                            | 1780.30             | 979.20              | 0.133                            | 1385.91             | 184.43              |
| A_68_P30345375 | chr15:75828132-75828176                           | NM_177922:3956      | Mapk15     | INSIDE                 | 0.318                                           | 0.516                            | 1004.95             | 518.50              | 0.164                            | 725.96              | 119.26              |
| A_68_P30345377 | chr15:75828316-75828360                           | NM_177922:4140      | Mapk15     | INSIDE                 | 0.176                                           | 0.653                            | 1469.85             | 960.03              | 0.115                            | 1061.69             | 122.25              |
| A_68_P29581489 | chr14:47917977-47918021                           | NM_178684:10        | Mapk1ip11  | INSIDE                 | 0.311                                           | 0.520                            | 1302.58             | 676.73              | 0.161                            | 1067.60             | 172.28              |
| A_68_P31829409 | chr18:74224278-74224322                           | NM_172632:303       | Mapk4      | INSIDE                 | 0.196                                           | 0.652                            | 2563.25             | 1670.09             | 0.128                            | 1920.54             | 245.38              |
| A_68_P31829416 | chr18:74225103-74225147                           | NM_172632:-521      | Mapk4      | PROMOTER               | 0.282                                           | 0.460                            | 1360.36             | 626.05              | 0.130                            | 1238.03             | 160.75              |
| A_68_P27848679 | chr11:61307617-61307661                           | NM_011841:67        | Mapk7      | INSIDE                 | 0.178                                           | 0.647                            | 1338.78             | 866.40              | 0.115                            | 1014.69             | 116.64              |
| A_68_P21428210 | chr2:92229536-92229580                            | NM_001202445:3282   | Mapk8ip1   | INSIDE                 | 0.216                                           | 0.541                            | 1363.25             | 737.44              | 0.117                            | 1008.86             | 117.90              |
| A_68_P30425255 | chr15:89284136-89284180                           | NM_021921:-183      | Mapk8ip2   | PROMOTER               | 0.550                                           | 0.697                            | 4044.32             | 2817.95             | 0.383                            | 2992.20             | 1146.30             |
| A_68_P30425256 | chr15:89284256-89284300                           | NM_021921:-63       | Mapk8ip2   | PROMOTER               | 0.124                                           | 1.457                            | 2526.93             | 3681.12             | 0.180                            | 1644.22             | 296.73              |
| A_68_P31100481 | chr17:25073380-25073424                           | NM_001163447:520    | Mapk8ip3   | INSIDE                 | 0.430                                           | 0.494                            | 1770.02             | 875.20              | 0.213                            | 1269.58             | 270.08              |
| A_68_P31556681 | chr18:23910710-23910754                           | NM_001162942:-101   | Mapre2     | PROMOTER               | 0.619                                           | 0.570                            | 1000.45             | 570.56              | 0.353                            | 907.80              | 320.23              |
| A_68_P31556969 | chr18:23962757-23962801                           | NM_153058:308       | Mapre2     | INSIDE                 | 0.073                                           | 1.884                            | 6992.76             | 13172.49            | 0.138                            | 4524.25             | 623.56              |
| A_68_P28089839 | chr11:104092302-104092349                         | NM_001038609:-424   | Mapt       | PROMOTER               | 0.234                                           | 0.649                            | 848.16              | 550.81              | 0.152                            | 767.68              | 116.83              |
| A_68_P28089843 | chr11:104092753-104092797                         | NM_001038609:25     | Mapt       | INSIDE                 | 0.342                                           | 0.509                            | 1566.11             | 797.20              | 0.174                            | 1253.98             | 218.61              |
| A_68_P28089844 | chr11:104092991-104093035                         | NM_001038609:263    | Mapt       | INSIDE                 | 0.391                                           | 1.364                            | 2693.55             | 3672.88             | 0.533                            | 1860.12             | 991.85              |
| A_68_P28089845 | chr11:104093103-104093147                         | NM_001038609:375    | Mapt       | INSIDE                 | 0.368                                           | 0.451                            | 1322.61             | 596.24              | 0.166                            | 913.25              | 151.68              |
| A_68_P28089849 | chr11:104093607-104093651                         | NM_001038609:879    | Mapt       | INSIDE                 | 0.234                                           | 0.384                            | 1552.58             | 596.49              | 0.090                            | 1337.82             | 120.28              |
| A_68_P28089853 | chr11:104094131-104094175                         | NM_001038609:1403   | Mapt       | INSIDE                 | 0.566                                           | 0.580                            | 2669.04             | 1548.50             | 0.328                            | 1732.60             | 568.89              |
| A_68_P31150248 | chr17:33855451-33855495                           | NM_145486:143       | Marchf2    | INSIDE                 | 0.461                                           | 0.518                            | 1175.41             | 608.38              | 0.239                            | 1107.68             | 264.24              |
| A_68_P31733116 | chr18:57085552-57085596                           | NM_177115:-372      | Marchf3    | PROMOTER               | 0.369                                           | 0.549                            | 1476.92             | 810.67              | 0.203                            | 1171.17             | 237.29              |
| A_68_P20337462 | chr1:72582708-72582752                            | NM_001045533:408    | Marchf4    | INSIDE                 | 0.201                                           | 0.683                            | 1949.89             | 1331.51             | 0.137                            | 1454.01             | 199.79              |
| A_68_P23297039 | chr4:129191585-129191629                          | NM_010807:782       | Marcks11   | INSIDE                 | 0.215                                           | 0.451                            | 2018.76             | 909.69              | 0.097                            | 1618.42             | 156.86              |
| A_68_P24993423 | chr7:20043402-20043446                            | NM_172279:419       | Mark4      | INSIDE                 | 0.245                                           | 0.476                            | 3301.16             | 1572.63             | 0.117                            | 2516.76             | 293.36              |
| A_68_P24993425 | chr7:20043646-20043690                            | NM_172279:175       | Mark4      | INSIDE                 | 0.185                                           | 2.249                            | 10218.67            | 22985.36            | 0.415                            | 6641.72             | 2756.53             |
| A_68_P24993428 | chr7:20044025-20044069                            | NM_172279:-203      | Mark4      | PROMOTER               | 0.432                                           | 0.471                            | 1471.90             | 693.97              | 0.204                            | 1226.71             | 249.76              |
| A_68_P27535211 | chr10:126748493-126748537                         | NM_001003913:328    | Mars       | INSIDE                 | 0.293                                           | 0.523                            | 4633.52             | 2422.92             | 0.153                            | 3347.90             | 513.77              |
| A_68_P27535212 | chr10:126748563-126748607                         | NM_001003913:258    | Mars       | INSIDE                 | 0.291                                           | 0.641                            | 1250.46             | 802.14              | 0.187                            | 1011.00             | 188.76              |
| A_68_P27535216 | chr10:126748924-126748968                         | NM_001003913:-104   | Mars       | PROMOTER               | 0.214                                           | 0.513                            | 1570.58             | 806.44              | 0.110                            | 1103.63             | 121.01              |
| A_68_P32119292 | chr19:42222487-42222531                           | NM_183195:630       | Marveld1   | INSIDE                 | 0.517                                           | 0.737                            | 5617.74             | 4142.62             | 0.381                            | 4129.04             | 1574.01             |
| A_68_P32119295 | chr19:42222796-42222840                           | NM_183195:940       | Marveld1   | INSIDE                 | 0.209                                           | 0.625                            | 1289.12             | 805.26              | 0.131                            | 991.06              | 129.49              |
| A_68_P26159871 | chr8:112472495-112472551                          | NM_212447:13583     | Marveld3   | INSIDE                 | 0.248                                           | 0.444                            | 1317.34             | 585.43              | 0.110                            | 1064.82             | 117.42              |
| A_68_P26022615 | chr8:87436867-87436911                            | NM_019945:24364     | Mast1      | INSIDE                 | 0.539                                           | 0.557                            | 1579.59             | 879.45              | 0.300                            | 1196.93             | 359.25              |

| ProbeName      | Target position of probe on CpG island microarray | TargetID          | GeneSymbol | CpG island Description | Ratio of relative methylation (TiO2-NP/Vehicle) | Sham group                       |                     |                     | TiO <sub>2</sub> -H group        |                     |                     |
|----------------|---------------------------------------------------|-------------------|------------|------------------------|-------------------------------------------------|----------------------------------|---------------------|---------------------|----------------------------------|---------------------|---------------------|
|                |                                                   |                   |            |                        |                                                 | Relative methylation (Cy-5/Cy-3) | Cy-3 signal (Input) | Cy-5 signal (MeDIP) | Relative methylation (Cy-5/Cy-3) | Cy-3 signal (Input) | Cy-5 signal (MeDIP) |
| A_68_P26022619 | chr8:87437298-87437343                            | NM_019945:23932   | Mast1      | INSIDE                 | 0.252                                           | 0.612                            | 1223.67             | 748.93              | 0.154                            | 931.22              | 143.43              |
| A_68_P26022686 | chr8:87447681-87447725                            | NM_019945:13550   | Mast1      | INSIDE                 | 0.518                                           | 2.821                            | 2382.49             | 6719.96             | 1.461                            | 1713.15             | 2503.61             |
| A_68_P26022753 | chr8:87461135-87461179                            | NM_019945:96      | Mast1      | INSIDE                 | 0.044                                           | 1.797                            | 5022.41             | 9027.06             | 0.078                            | 3037.14             | 237.70              |
| A_68_P25954140 | chr8:73321012-73321061                            | NM_199308:-4704   | Mast3      | PROMOTER               | 0.379                                           | 3.708                            | 4916.78             | 18230.35            | 1.407                            | 3289.09             | 4627.57             |
| A_68_P25954141 | chr8:73321121-73321165                            | NM_199308:-4810   | Mast3      | PROMOTER               | 0.144                                           | 2.216                            | 3856.19             | 8546.18             | 0.320                            | 2589.98             | 828.89              |
| A_68_P25954143 | chr8:73321298-73321342                            | NM_199308:-4988   | Mast3      | PROMOTER               | 0.324                                           | 1.546                            | 3449.19             | 5331.35             | 0.501                            | 2349.00             | 1176.71             |
| A_68_P25954146 | chr8:73321652-73321696                            | NM_199308:-5342   | Mast3      | PROMOTER               | 0.305                                           | 0.487                            | 1954.75             | 951.25              | 0.148                            | 1418.66             | 210.64              |
| A_68_P25954147 | chr8:73321717-73321761                            | NM_199308:-5406   | Mast3      | PROMOTER               | 0.536                                           | 0.676                            | 1483.89             | 1002.87             | 0.362                            | 1063.48             | 384.95              |
| A_68_P29284641 | chr13:104125004-104125048                         | NM_175171:-454    | Mast4      | PROMOTER               | 0.577                                           | 0.664                            | 1558.60             | 1034.88             | 0.383                            | 1257.14             | 481.27              |
| A_68_P30127810 | chr15:34236528-34236572                           | NM_016762:115     | Matn2      | INSIDE                 | 0.328                                           | 0.640                            | 2207.22             | 1411.80             | 0.210                            | 1655.60             | 346.92              |
| A_68_P21817647 | chr2:164229981-164230025                          | NM_013592:112     | Matn4      | INSIDE                 | 0.391                                           | 0.476                            | 1295.63             | 616.22              | 0.186                            | 1035.52             | 192.49              |
| A_68_P21817648 | chr2:164230100-164230144                          | NM_013592:-8      | Matn4      | PROMOTER               | 0.626                                           | 0.426                            | 1891.65             | 806.02              | 0.267                            | 1543.94             | 412.07              |
| A_68_P31618898 | chr18:35721681-35721725                           | NM_010771:-109    | Matr3      | PROMOTER               | 0.583                                           | 0.687                            | 1018.69             | 700.32              | 0.401                            | 801.10              | 320.86              |
| A_68_P28556953 | chr12:78063293-78063337                           | NM_001146176:-79  | Max        | PROMOTER               | 0.194                                           | 1.514                            | 2927.83             | 4433.05             | 0.293                            | 2024.08             | 593.04              |
| A_68_P28556954 | chr12:78063431-78063475                           | NM_001146176:-217 | Max        | PROMOTER               | 0.214                                           | 0.552                            | 1344.60             | 742.55              | 0.118                            | 1011.22             | 119.36              |
| A_68_P28556955 | chr12:78063502-78063546                           | NM_001146176:-289 | Max        | PROMOTER               | 0.225                                           | 0.632                            | 1880.31             | 1187.61             | 0.142                            | 1410.83             | 200.35              |
| A_68_P25503658 | chr7:134170789-134170833                          | NM_010772:-817    | Maz        | PROMOTER               | 0.108                                           | 2.170                            | 20497.19            | 44486.13            | 0.235                            | 12606.55            | 2958.09             |
| A_68_P27282971 | chr10:79862699-79862743                           | NM_013595:-496    | Mbd3       | PROMOTER               | 0.356                                           | 0.579                            | 916.64              | 530.98              | 0.206                            | 663.01              | 136.66              |
| A_68_P24129308 | chr5:138635505-138635553                          | NM_177878:-13     | Mblac1     | PROMOTER               | 0.198                                           | 0.526                            | 1362.28             | 716.73              | 0.104                            | 1168.05             | 121.94              |
| A_68_P24129310 | chr5:138635652-138635696                          | NM_177878:133     | Mblac1     | INSIDE                 | 0.464                                           | 0.517                            | 1585.64             | 819.11              | 0.239                            | 1251.92             | 299.75              |
| A_68_P32375459 | chrX:48558594-48558638                            | NM_134163:393     | Mbnl3      | INSIDE                 | 0.135                                           | 1.594                            | 2211.23             | 3523.80             | 0.215                            | 885.86              | 190.30              |
| A_68_P32375460 | chrX:48558753-48558797                            | NM_134163:235     | Mbnl3      | INSIDE                 | 0.073                                           | 1.444                            | 3023.47             | 4366.83             | 0.106                            | 1085.52             | 115.03              |
| A_68_P28291795 | chr12:25515888-25515932                           | NM_001083341:-553 | Mboat2     | PROMOTER               | 0.224                                           | 0.425                            | 1799.10             | 765.28              | 0.095                            | 1226.85             | 116.65              |
| A_68_P24946853 | chr7:3644138-3644182                              | NM_029934:967     | Mboat7     | INSIDE                 | 0.274                                           | 0.511                            | 1155.74             | 591.04              | 0.140                            | 868.71              | 121.60              |
| A_68_P24946854 | chr7:3644206-3644250                              | NM_029934:899     | Mboat7     | INSIDE                 | 0.222                                           | 0.523                            | 2317.38             | 1211.72             | 0.116                            | 1868.31             | 216.60              |
| A_68_P24946855 | chr7:3644343-3644387                              | NM_029934:763     | Mboat7     | INSIDE                 | 0.235                                           | 0.516                            | 2454.88             | 1266.28             | 0.121                            | 2005.03             | 243.01              |
| A_68_P24946857 | chr7:3644688-3644732                              | NM_029934:417     | Mboat7     | INSIDE                 | 0.513                                           | 0.400                            | 1815.75             | 726.91              | 0.206                            | 1469.67             | 302.04              |
| A_68_P24946860 | chr7:3645012-3645069                              | NM_029934:87      | Mboat7     | INSIDE                 | 0.272                                           | 0.425                            | 1259.44             | 535.12              | 0.116                            | 1026.35             | 118.71              |
| A_68_P32767188 | chrX:154035988-154036043                          | NM_172307:632     | Mbtps2     | INSIDE                 | 0.111                                           | 1.744                            | 1575.08             | 2746.45             | 0.194                            | 594.09              | 115.24              |
| A_68_P26465868 | chr9:43938018-43938064                            | NM_023061:-4700   | Mcarn      | PROMOTER               | 0.285                                           | 0.654                            | 1067.23             | 697.96              | 0.186                            | 841.86              | 156.71              |
| A_68_P26465869 | chr9:43938100-43938144                            | NM_023061:-4618   | Mcarn      | PROMOTER               | 0.579                                           | 0.651                            | 1367.40             | 889.59              | 0.377                            | 920.52              | 346.68              |
| A_68_P26465908 | chr9:43942942-43942986                            | NM_023061:224     | Mcarn      | INSIDE                 | 0.087                                           | 0.708                            | 3512.73             | 2485.37             | 0.062                            | 2331.60             | 143.60              |
| A_68_P22882728 | chr4:45421725-45421769                            | NM_001009949:-108 | Mcart1     | PROMOTER               | 0.544                                           | 0.460                            | 1645.80             | 756.44              | 0.250                            | 1276.62             | 319.43              |
| A_68_P31669146 | chr18:44972023-44972067                           | NM_001085373:-208 | Mcc        | PROMOTER               | 0.212                                           | 0.680                            | 1072.62             | 729.22              | 0.144                            | 950.32              | 136.99              |
| A_68_P22056222 | chr3:35899243-35899287                            | NM_023644:336     | Mccc1      | INSIDE                 | 0.493                                           | 0.460                            | 1174.19             | 539.96              | 0.227                            | 919.31              | 208.37              |
| A_68_P22056223 | chr3:35899395-35899439                            | NM_023644:184     | Mccc1      | INSIDE                 | 0.189                                           | 0.613                            | 4751.54             | 2913.71             | 0.116                            | 3569.33             | 414.04              |
| A_68_P22056224 | chr3:35899487-35899534                            | NM_023644:90      | Mccc1      | INSIDE                 | 0.129                                           | 0.627                            | 2218.23             | 1390.88             | 0.081                            | 1506.04             | 121.77              |
| A_68_P29266706 | chr13:100785478-100785522                         | NM_030026:94      | Mccc2      | INSIDE                 | 0.599                                           | 0.479                            | 1263.17             | 604.47              | 0.286                            | 969.08              | 277.61              |
| A_68_P25664799 | chr8:12915651-12915695                            | NM_178076:-220    | Mcf21      | PROMOTER               | 0.099                                           | 0.713                            | 2965.67             | 2115.78             | 0.071                            | 1847.24             | 130.46              |
| A_68_P25664801 | chr8:12915981-12916035                            | NM_178076:116     | Mcf21      | INSIDE                 | 0.274                                           | 0.689                            | 1297.83             | 894.77              | 0.189                            | 959.41              | 181.19              |
| A_68_P31422103 | chr17:87665170-87665214                           | NM_139295:95      | Mcf2d      | INSIDE                 | 0.476                                           | 0.560                            | 4201.84             | 2354.54             | 0.267                            | 2989.83             | 797.80              |
| A_68_P24624871 | chr6:88848565-88848609                            | NM_008564:188     | Mcm2       | INSIDE                 | 0.208                                           | 0.552                            | 1909.73             | 1053.30             | 0.115                            | 1419.60             | 162.77              |
| A_68_P27262211 | chr10:75931408-75931452                           | NM_019434:-285    | Mcm3ap     | PROMOTER               | 0.395                                           | 0.628                            | 2981.60             | 1872.43             | 0.248                            | 2404.79             | 596.32              |
| A_68_P27262214 | chr10:75931729-75931773                           | NM_019434:35      | Mcm3ap     | INSIDE                 | 0.450                                           | 0.287                            | 2471.94             | 708.97              | 0.129                            | 1970.94             | 254.13              |

| ProbeName       | Target position of probe on CpG island microarray | TargetID           | GeneSymbol | CpG island Description | Ratio of relative methylation (TiO2-NP/Vehicle) | Sham group                       |                     |                     | TiO <sub>2</sub> -H group        |                     |                     |
|-----------------|---------------------------------------------------|--------------------|------------|------------------------|-------------------------------------------------|----------------------------------|---------------------|---------------------|----------------------------------|---------------------|---------------------|
|                 |                                                   |                    |            |                        |                                                 | Relative methylation (Cy-5/Cy-3) | Cy-3 signal (Input) | Cy-5 signal (MeDIP) | Relative methylation (Cy-5/Cy-3) | Cy-3 signal (Input) | Cy-5 signal (MeDIP) |
| A_68_P30566358  | chr16:15637618-15637664                           | NM_008565:-147     | Mem4       | DIVERGENT_PROMOTER     | 0.266                                           | 0.442                            | 1217.32             | 537.50              | 0.118                            | 991.35              | 116.59              |
| A_68_P25972025  | chr8:77633597-77633641                            | NM_008566:192      | Mem5       | INSIDE                 | 0.575                                           | 0.451                            | 1369.88             | 617.36              | 0.259                            | 1024.82             | 265.60              |
| A_68_P25972026  | chr8:77633688-77633732                            | NM_008566:284      | Mem5       | INSIDE                 | 0.247                                           | 0.479                            | 1134.94             | 543.88              | 0.118                            | 977.78              | 115.69              |
| A_68_P20600071  | chr1:130256165-130256209                          | NM_008567:47       | Mem6       | INSIDE                 | 0.371                                           | 0.330                            | 1786.80             | 589.58              | 0.122                            | 1566.63             | 191.87              |
| A_68_P27143272  | chr10:53349951-53349995                           | NM_027830:273      | Mem9       | INSIDE                 | 0.362                                           | 1.819                            | 5783.79             | 10523.23            | 0.659                            | 3906.06             | 2574.75             |
| A_68_P225512275 | chr7:135883649-135883693                          | NM_145955:273      | Mcm9       | INSIDE                 | 0.501                                           | 0.600                            | 1175.55             | 705.52              | 0.300                            | 1019.38             | 306.24              |
| A_68_P22612825  | chr3:145812772-145812816                          | NM_026656:-2       | Mcoln2     | PROMOTER               | 0.227                                           | 0.553                            | 1541.66             | 852.82              | 0.125                            | 1200.17             | 150.48              |
| A_68_P29154205  | chr13:76522219-76522263                           | NM_030174:-168     | Mctp1      | PROMOTER               | 0.410                                           | 0.580                            | 1388.94             | 805.24              | 0.237                            | 1088.20             | 258.36              |
| A_68_P31161217  | chr17:35978332-35978376                           | NM_001010833:-88   | Mdc1       | DIVERGENT_PROMOTER     | 0.303                                           | 0.334                            | 1856.65             | 620.90              | 0.101                            | 1507.56             | 152.63              |
| A_68_P31161220  | chr17:35978699-35978752                           | NM_001010833:283   | Mdc1       | INSIDE                 | 0.336                                           | 0.678                            | 1164.75             | 789.22              | 0.227                            | 855.22              | 194.47              |
| A_68_P24258182  | chr6:15671365-15671410                            | NM_175088:727      | Mdfic      | INSIDE                 | 0.359                                           | 0.494                            | 1383.43             | 683.28              | 0.177                            | 1037.11             | 183.71              |
| A_68_P31130151  | chr17:29979095-29979139                           | NM_001081160:45711 | Mdga1      | INSIDE                 | 0.310                                           | 0.737                            | 3923.97             | 2892.50             | 0.228                            | 2840.85             | 649.04              |
| A_68_P31130153  | chr17:29979350-29979394                           | NM_001081160:45455 | Mdga1      | INSIDE                 | 0.183                                           | 0.619                            | 1900.79             | 1177.29             | 0.113                            | 1366.30             | 154.62              |
| A_68_P31130218  | chr17:29989237-29989281                           | NM_001081160:35569 | Mdga1      | INSIDE                 | 0.219                                           | 1.358                            | 2278.29             | 3093.88             | 0.297                            | 1689.65             | 501.92              |
| A_68_P31130465  | chr17:30025201-30025252                           | NM_001081160:-399  | Mdga1      | PROMOTER               | 0.168                                           | 0.458                            | 2153.69             | 986.16              | 0.077                            | 1512.45             | 116.44              |
| A_68_P31130472  | chr17:30026258-30026302                           | NM_001081160:-1453 | Mdga1      | PROMOTER               | 0.152                                           | 0.662                            | 2377.77             | 1573.85             | 0.101                            | 1842.43             | 185.49              |
| A_68_P31130473  | chr17:30026432-30026476                           | NM_001081160:-1627 | Mdga1      | PROMOTER               | 0.197                                           | 0.660                            | 1154.37             | 761.80              | 0.130                            | 942.24              | 122.67              |
| A_68_P31130474  | chr17:30026534-30026578                           | NM_001081160:-1729 | Mdga1      | PROMOTER               | 0.470                                           | 0.578                            | 1314.33             | 759.29              | 0.271                            | 1054.23             | 286.10              |
| A_68_P28504589  | chr12:68321801-68321851                           | NM_001193266:1710  | Mdga2      | INSIDE                 | 0.240                                           | 0.598                            | 1030.45             | 616.64              | 0.144                            | 804.32              | 115.52              |
| A_68_P28504593  | chr12:68322368-68322415                           | NM_001193266:1145  | Mdga2      | INSIDE                 | 0.359                                           | 1.495                            | 2753.81             | 4116.16             | 0.536                            | 1988.65             | 1066.51             |
| A_68_P24117829  | chr5:136254539-136254583                          | NM_008617:42       | Mdh2       | INSIDE                 | 0.194                                           | 0.537                            | 1534.04             | 823.93              | 0.104                            | 1230.67             | 128.20              |
| A_68_P24117834  | chr5:136255023-136255074                          | NM_008617:530      | Mdh2       | INSIDE                 | 0.188                                           | 0.531                            | 1482.95             | 787.91              | 0.100                            | 1213.50             | 121.36              |
| A_68_P27484948  | chr10:117578776-117578823                         | NM_001162904:-43   | Mdm1       | PROMOTER               | 0.380                                           | 0.638                            | 1123.74             | 716.89              | 0.242                            | 880.61              | 213.36              |
| A_68_P27482565  | chr10:117147534-117147578                         | NM_010786:216      | Mdm2       | INSIDE                 | 0.489                                           | 0.534                            | 1301.76             | 695.21              | 0.261                            | 1130.71             | 295.02              |
| A_68_P20625164  | chr1:134921568-134921624                          | NM_008575:329      | Mdm4       | INSIDE                 | 0.211                                           | 0.476                            | 1535.53             | 731.06              | 0.100                            | 1151.70             | 115.67              |
| A_68_P29619152  | chr14:56279216-56279260                           | NM_023397:107      | Mdp1       | INSIDE                 | 0.181                                           | 0.725                            | 2116.29             | 1534.67             | 0.132                            | 1468.61             | 193.27              |
| A_68_P31827988  | chr18:73975355-73975399                           | NM_145494:-330     | Me2        | PROMOTER               | 0.360                                           | 0.639                            | 2932.55             | 1873.53             | 0.230                            | 2291.93             | 527.23              |
| A_68_P31208333  | chr17:46818209-46818253                           | NM_010787:145      | Mea1       | INSIDE                 | 0.156                                           | 0.716                            | 1656.82             | 1185.83             | 0.111                            | 1208.63             | 134.59              |
| A_68_P22028766  | chr3:30407046-30407090                            | NM_021442:1341     | Mecom      | INSIDE                 | 0.207                                           | 0.554                            | 1358.36             | 752.35              | 0.114                            | 1029.61             | 117.86              |
| A_68_P22028767  | chr3:30407126-30407173                            | NM_021442:1260     | Mecom      | INSIDE                 | 0.159                                           | 0.715                            | 1488.17             | 1063.97             | 0.113                            | 1059.84             | 120.29              |
| A_68_P22028769  | chr3:30407354-30407398                            | NM_021442:1033     | Mecom      | INSIDE                 | 0.269                                           | 0.736                            | 4058.31             | 2988.19             | 0.198                            | 3247.42             | 643.40              |
| A_68_P22028818  | chr3:30413802-30413849                            | NM_021442:-5416    | Mecom      | PROMOTER               | 0.245                                           | 0.540                            | 1131.26             | 610.42              | 0.132                            | 897.32              | 118.46              |
| A_68_P32466326  | chrX:71330622-71330666                            | NM_010788:288      | Mecp2      | INSIDE                 | 0.099                                           | 1.935                            | 2987.87             | 5781.00             | 0.192                            | 1034.32             | 198.18              |
| A_68_P23308627  | chr4:131399668-131399712                          | NM_025297:305      | Mecr       | INSIDE                 | 0.153                                           | 0.516                            | 1774.46             | 915.24              | 0.079                            | 1464.90             | 115.24              |
| A_68_P28054913  | chr11:98054206-98054250                           | NM_013634:-8       | Med1       | PROMOTER               | 0.245                                           | 0.407                            | 1488.16             | 606.27              | 0.100                            | 1159.67             | 115.57              |
| A_68_P32563202  | chrX:98469396-98469440                            | NM_021521:-11      | Med12      | DIVERGENT_PROMOTER     | 0.129                                           | 1.795                            | 3286.56             | 5899.12             | 0.231                            | 1244.23             | 287.86              |
| A_68_P27988567  | chr11:86170969-86171013                           | NM_00108093:137    | Med13      | INSIDE                 | 0.372                                           | 0.633                            | 2475.01             | 1567.00             | 0.236                            | 1888.51             | 445.29              |
| A_68_P30575357  | chr16:17722612-17722656                           | NM_001040683:389   | Med15      | INSIDE                 | 0.285                                           | 0.581                            | 1108.52             | 643.61              | 0.165                            | 918.66              | 151.83              |
| A_68_P30575358  | chr16:17722742-17722786                           | NM_001040683:259   | Med15      | INSIDE                 | 0.286                                           | 0.453                            | 1994.93             | 904.08              | 0.130                            | 1685.87             | 218.73              |
| A_68_P23312412  | chr4:132019695-132019742                          | NM_026039:118      | Med18      | INSIDE                 | 0.583                                           | 0.639                            | 1206.94             | 770.71              | 0.372                            | 972.08              | 362.05              |
| A_68_P23312413  | chr4:132019816-132019860                          | NM_026039:-2       | Med18      | PROMOTER               | 0.220                                           | 0.510                            | 1309.51             | 667.85              | 0.112                            | 1033.51             | 116.04              |
| A_68_P24929767  | chr6:146591034-146591078                          | NM_025315:-44      | Med21      | DIVERGENT_PROMOTER     | 0.623                                           | 0.583                            | 1030.87             | 600.65              | 0.363                            | 804.04              | 292.07              |
| A_68_P24929768  | chr6:146591129-146591173                          | NM_025315:50       | Med21      | INSIDE                 | 0.335                                           | 0.478                            | 1517.62             | 725.11              | 0.160                            | 1248.74             | 199.94              |
| A_68_P25089970  | chr7:52147618-52147662                            | NM_029365:96       | Med25      | INSIDE                 | 0.159                                           | 0.434                            | 2815.10             | 1223.08             | 0.069                            | 2156.39             | 148.87              |

| ProbeName      | Target position of probe on CpG island microarray | TargetID            | GeneSymbol | CpG island Description | Ratio of relative methylation (TiO2-NP/Vehicle) | Sham group                       |                     |                     | TiO <sub>2</sub> -H group        |                     |                     |
|----------------|---------------------------------------------------|---------------------|------------|------------------------|-------------------------------------------------|----------------------------------|---------------------|---------------------|----------------------------------|---------------------|---------------------|
|                |                                                   |                     |            |                        |                                                 | Relative methylation (Cy-5/Cy-3) | Cy-3 signal (Input) | Cy-5 signal (MeDIP) | Relative methylation (Cy-5/Cy-3) | Cy-3 signal (Input) | Cy-5 signal (MeDIP) |
| A_68_P23657076 | chr5:45911955-45911999                            | NM_025895:509       | Med28      | INSIDE                 | 0.231                                           | 0.478                            | 1401.70             | 669.62              | 0.110                            | 1080.19             | 119.27              |
| A_68_P29717921 | chr14:73909953-73909997                           | NM_026119:119       | Med4       | INSIDE                 | 0.540                                           | 0.453                            | 1921.04             | 869.75              | 0.244                            | 1616.83             | 395.26              |
| A_68_P28581705 | chr12:82696134-82696178                           | NM_027213:-211      | Med6       | PROMOTER               | 0.546                                           | 3.552                            | 7665.01             | 27224.48            | 1.939                            | 4821.74             | 9348.28             |
| A_68_P27767867 | chr11:46250322-46250367                           | NM_001104530:-104   | Med7       | PROMOTER               | 0.353                                           | 0.399                            | 1342.28             | 535.92              | 0.141                            | 1034.22             | 145.75              |
| A_68_P27767868 | chr11:46250398-46250442                           | NM_001104530:-28    | Med7       | PROMOTER               | 0.413                                           | 0.663                            | 990.79              | 656.77              | 0.274                            | 789.79              | 216.19              |
| A_68_P23240178 | chr4:118082173-118082217                          | NM_020000:253       | Med8       | INSIDE                 | 0.245                                           | 1.336                            | 7930.80             | 10595.11            | 0.327                            | 4974.24             | 1627.96             |
| A_68_P25193391 | chr7:74516874-74516921                            | NM_001033713:847    | Mef2a      | INSIDE                 | 0.270                                           | 0.382                            | 1531.05             | 584.82              | 0.103                            | 1173.78             | 120.84              |
| A_68_P31734231 | chr18:57292496-57292540                           | NM_001001979:-225   | Megf10     | PROMOTER               | 0.536                                           | 0.632                            | 1758.89             | 1111.93             | 0.339                            | 1408.68             | 477.32              |
| A_68_P31734233 | chr18:57292628-57292672                           | NM_001001979:-93    | Megf10     | PROMOTER               | 0.199                                           | 0.624                            | 2747.69             | 1713.88             | 0.124                            | 2036.81             | 252.76              |
| A_68_P31734234 | chr18:57292707-57292751                           | NM_001001979:-15    | Megf10     | PROMOTER               | 0.617                                           | 0.485                            | 1416.03             | 687.00              | 0.299                            | 1027.76             | 307.71              |
| A_68_P26581610 | chr9:64233768-64233812                            | NM_172522:358       | Megf11     | INSIDE                 | 0.397                                           | 0.699                            | 2374.21             | 1658.78             | 0.277                            | 1758.64             | 487.33              |
| A_68_P26581615 | chr9:64234276-64234320                            | NM_172522:866       | Megf11     | INSIDE                 | 0.343                                           | 0.588                            | 1478.56             | 868.87              | 0.202                            | 1282.68             | 258.60              |
| A_68_P23006649 | chr4:70195250-70195294                            | NM_172694:690       | Megf9      | INSIDE                 | 0.445                                           | 0.493                            | 1476.67             | 728.09              | 0.220                            | 1292.16             | 283.64              |
| A_68_P23006655 | chr4:70196033-70196077                            | NM_172694:-92       | Megf9      | PROMOTER               | 0.526                                           | 0.513                            | 1080.16             | 554.51              | 0.270                            | 939.24              | 253.74              |
| A_68_P23006657 | chr4:70196174-70196218                            | NM_172694:-234      | Megf9      | PROMOTER               | 0.437                                           | 0.589                            | 1971.72             | 1161.27             | 0.257                            | 1607.21             | 413.20              |
| A_68_P23006658 | chr4:70196288-70196332                            | NM_172694:-348      | Megf9      | PROMOTER               | 0.627                                           | 0.437                            | 1205.86             | 527.14              | 0.274                            | 1004.73             | 275.61              |
| A_68_P21548581 | chr2:115686326-115686370                          | NM_001159569:204009 | Meis2      | DOWNSTREAM             | 0.344                                           | 0.430                            | 1557.31             | 669.02              | 0.148                            | 1174.48             | 173.63              |
| A_68_P21550148 | chr2:115887946-115888001                          | NM_001159569:2384   | Meis2      | INSIDE                 | 0.167                                           | 0.631                            | 1793.58             | 1132.21             | 0.105                            | 1249.50             | 131.44              |
| A_68_P21550149 | chr2:115888052-115888096                          | NM_001159569:2283   | Meis2      | INSIDE                 | 0.292                                           | 0.513                            | 1690.71             | 867.77              | 0.150                            | 1157.09             | 173.65              |
| A_68_P21550150 | chr2:115888204-115888259                          | NM_001159569:2126   | Meis2      | INSIDE                 | 0.514                                           | 0.495                            | 1260.07             | 624.13              | 0.255                            | 1004.28             | 255.89              |
| A_68_P24980081 | chr7:16760697-16760741                            | NM_008627:-10       | Meis3      | PROMOTER               | 0.319                                           | 0.416                            | 1308.51             | 543.77              | 0.133                            | 1110.65             | 147.46              |
| A_68_P31934033 | chr19:6335488-6335532                             | NM_001168490:472    | Men1       | INSIDE                 | 0.459                                           | 0.544                            | 2134.24             | 1160.38             | 0.250                            | 1686.74             | 421.39              |
| A_68_P31934035 | chr19:6335704-6335748                             | NM_001168490:688    | Men1       | INSIDE                 | 0.472                                           | 0.386                            | 3461.25             | 1336.00             | 0.182                            | 2378.54             | 432.94              |
| A_68_P24127563 | chr5:138227997-138228041                          | NM_144913:-89       | Mepece     | DIVERGENT_PROMOTER     | 0.251                                           | 0.520                            | 1295.01             | 673.71              | 0.131                            | 955.63              | 125.01              |
| A_68_P25285301 | chr7:91032798-91032845                            | NM_030705:30        | Mesdc1     | INSIDE                 | 0.189                                           | 0.632                            | 1311.23             | 829.13              | 0.120                            | 982.24              | 117.63              |
| A_68_P25285304 | chr7:91033159-91033207                            | NM_030705:-331      | Mesdc1     | DIVERGENT_PROMOTER     | 0.172                                           | 0.583                            | 1623.03             | 945.70              | 0.100                            | 1225.91             | 122.59              |
| A_68_P25285350 | chr7:91040523-91040567                            | NM_023403:35        | Mesdc2     | INSIDE                 | 0.167                                           | 0.650                            | 4459.46             | 2898.61             | 0.108                            | 3202.79             | 347.19              |
| A_68_P25285353 | chr7:91040923-91040967                            | NM_023403:435       | Mesdc2     | INSIDE                 | 0.343                                           | 0.742                            | 3615.43             | 2682.89             | 0.254                            | 2438.90             | 620.28              |
| A_68_P28192098 | chr11:121563706-121563750                         | NM_144797:-12       | Metrl      | PROMOTER               | 0.412                                           | 0.530                            | 1369.10             | 725.65              | 0.218                            | 1193.02             | 260.61              |
| A_68_P28192099 | chr11:121563822-121563866                         | NM_144797:104       | Metrl      | INSIDE                 | 0.529                                           | 0.553                            | 1960.77             | 1085.19             | 0.293                            | 1643.80             | 481.06              |
| A_68_P27533648 | chr10:126479103-126479147                         | NM_010792:137       | Mett11     | INSIDE                 | 0.520                                           | 0.627                            | 2175.66             | 1364.15             | 0.326                            | 1711.38             | 558.10              |
| A_68_P27533650 | chr10:126479347-126479401                         | NM_010792:387       | Mett11     | INSIDE                 | 0.244                                           | 0.591                            | 1156.34             | 683.10              | 0.144                            | 809.82              | 116.79              |
| A_68_P25537271 | chr7:140044033-140044077                          | NM_028095:276       | Mett110    | INSIDE                 | 0.354                                           | 0.616                            | 1386.53             | 854.61              | 0.218                            | 1115.54             | 243.58              |
| A_68_P20778371 | chr1:164478469-164478518                          | NM_144877:-17       | Mett113    | PROMOTER               | 0.158                                           | 0.603                            | 1649.91             | 995.20              | 0.095                            | 1268.58             | 120.94              |
| A_68_P20778374 | chr1:164478713-164478757                          | NM_144877:-258      | Mett113    | PROMOTER               | 0.376                                           | 0.698                            | 1673.31             | 1168.63             | 0.263                            | 1374.55             | 360.91              |
| A_68_P27922355 | chr11:74584384-74584428                           | NM_026197:42        | Mett116    | INSIDE                 | 0.416                                           | 0.584                            | 2413.79             | 1410.45             | 0.243                            | 1906.66             | 463.72              |
| A_68_P27922356 | chr11:74584498-74584542                           | NM_026197:156       | Mett116    | INSIDE                 | 0.467                                           | 0.541                            | 1514.82             | 819.63              | 0.253                            | 1039.96             | 263.00              |
| A_68_P27922357 | chr11:74584686-74584730                           | NM_026197:344       | Mett116    | INSIDE                 | 0.094                                           | 1.562                            | 1192.86             | 1863.45             | 0.147                            | 942.42              | 138.16              |
| A_68_P20293520 | chr1:64664228-64664272                            | NM_025964:-508      | Mett121a   | PROMOTER               | 0.428                                           | 0.546                            | 1851.72             | 1011.72             | 0.234                            | 1475.13             | 344.59              |
| A_68_P30532723 | chr16:8471005-8471050                             | NM_146247:122       | Mett122    | INSIDE                 | 0.539                                           | 0.587                            | 1087.20             | 638.15              | 0.317                            | 803.36              | 254.38              |
| A_68_P30532724 | chr16:8471150-8471194                             | NM_146247:267       | Mett122    | INSIDE                 | 0.167                                           | 0.473                            | 2176.31             | 1028.99             | 0.079                            | 1670.76             | 131.59              |
| A_68_P21311538 | chr2:69723596-69723640                            | NM_029280:43        | Mett5      | INSIDE                 | 0.237                                           | 0.361                            | 1892.72             | 683.01              | 0.086                            | 1449.82             | 124.08              |
| A_68_P29512324 | chr14:32307722-32307766                           | NM_025907:419       | Mett16     | INSIDE                 | 0.386                                           | 0.405                            | 1352.21             | 548.05              | 0.157                            | 1069.13             | 167.34              |
| A_68_P29512326 | chr14:32307928-32307972                           | NM_025907:213       | Mett16     | INSIDE                 | 0.257                                           | 0.637                            | 3846.95             | 2451.42             | 0.164                            | 2876.98             | 472.03              |



| ProbeName      | Target position of probe on CpG island microarray | TargetID          | GeneSymbol | CpG island Description | Ratio of relative methylation (TiO2-NP/Vehicle) | Sham group                       |                     |                     | TiO <sub>2</sub> -H group        |                     |                     |
|----------------|---------------------------------------------------|-------------------|------------|------------------------|-------------------------------------------------|----------------------------------|---------------------|---------------------|----------------------------------|---------------------|---------------------|
|                |                                                   |                   |            |                        |                                                 | Relative methylation (Cy-5/Cy-3) | Cy-3 signal (Input) | Cy-5 signal (MeDIP) | Relative methylation (Cy-5/Cy-3) | Cy-3 signal (Input) | Cy-5 signal (MeDIP) |
| A_68_P25471699 | chr7:128177893-128177937                          | NM_021554:-44     | Mettl9     | PROMOTER               | 0.319                                           | 0.628                            | 917.67              | 575.84              | 0.200                            | 724.47              | 145.05              |
| A_68_P22314345 | chr3:88340114-88340159                            | NM_001029890:3820 | Mex3a      | INSIDE                 | 0.359                                           | 0.669                            | 1173.92             | 785.40              | 0.240                            | 815.67              | 195.79              |
| A_68_P25279939 | chr7:90014474-90014518                            | NM_175366:-1346   | Mex3b      | PROMOTER               | 0.624                                           | 0.515                            | 3217.05             | 1657.68             | 0.322                            | 2574.17             | 827.85              |
| A_68_P25279940 | chr7:90014576-90014620                            | NM_175366:-1244   | Mex3b      | PROMOTER               | 0.321                                           | 0.602                            | 1372.26             | 826.29              | 0.193                            | 1055.62             | 203.99              |
| A_68_P25279944 | chr7:90015164-90015208                            | NM_175366:-656    | Mex3b      | PROMOTER               | 0.341                                           | 0.517                            | 1609.49             | 832.10              | 0.176                            | 1251.62             | 220.49              |
| A_68_P25279951 | chr7:90016308-90016352                            | NM_175366:488     | Mex3b      | INSIDE                 | 0.204                                           | 0.519                            | 1451.64             | 753.75              | 0.106                            | 1151.48             | 121.92              |
| A_68_P25279963 | chr7:90017868-90017912                            | NM_175366:2048    | Mex3b      | INSIDE                 | 0.405                                           | 0.636                            | 1415.44             | 900.30              | 0.258                            | 1133.24             | 291.99              |
| A_68_P25279966 | chr7:90018157-90018201                            | NM_175366:2336    | Mex3b      | INSIDE                 | 0.466                                           | 0.598                            | 945.76              | 565.74              | 0.279                            | 699.85              | 195.23              |
| A_68_P31826517 | chr18:73733495-73733539                           | NM_001039214:1158 | Mex3c      | INSIDE                 | 0.078                                           | 1.399                            | 2843.39             | 3978.71             | 0.110                            | 1972.83             | 216.63              |
| A_68_P27282836 | chr10:79844946-79844990                           | NM_198615:5428    | Mex3d      | INSIDE                 | 0.638                                           | 2.635                            | 587.52              | 1547.81             | 1.682                            | 514.30              | 864.85              |
| A_68_P27282871 | chr10:79849463-79849507                           | NM_198615:912     | Mex3d      | INSIDE                 | 0.268                                           | 0.520                            | 1423.79             | 740.17              | 0.139                            | 938.11              | 130.48              |
| A_68_P23361560 | chr4:140566716-140566760                          | NM_008546:187     | Mfap2      | INSIDE                 | 0.485                                           | 0.496                            | 1156.20             | 573.98              | 0.241                            | 893.26              | 214.88              |
| A_68_P25905383 | chr8:63111766-63111810                            | NM_027756:132     | Mfap3l     | INSIDE                 | 0.425                                           | 0.452                            | 2114.35             | 955.46              | 0.192                            | 1973.04             | 379.33              |
| A_68_P20394350 | chr1:82721424-82721468                            | NM_029409:-46     | Mff        | PROMOTER               | 0.216                                           | 0.666                            | 1563.58             | 1041.16             | 0.144                            | 1171.41             | 168.60              |
| A_68_P25780627 | chr8:36650640-36650684                            | NM_001081279:-189 | Mfhas1     | PROMOTER               | 0.170                                           | 0.626                            | 1764.56             | 1105.26             | 0.106                            | 1344.87             | 142.89              |
| A_68_P25780634 | chr8:36651604-36651648                            | NM_001081279:775  | Mfhas1     | INSIDE                 | 0.406                                           | 0.482                            | 1783.48             | 859.18              | 0.196                            | 1341.49             | 262.70              |
| A_68_P23391249 | chr4:147279034-147279078                          | NM_133201:-128    | Mfn2       | PROMOTER               | 0.075                                           | 0.741                            | 3922.36             | 2905.25             | 0.056                            | 2626.60             | 146.34              |
| A_68_P22210773 | chr3:67386862-67386906                            | NM_025813:195     | Mfsd1      | INSIDE                 | 0.431                                           | 0.436                            | 1431.44             | 623.47              | 0.188                            | 1098.19             | 206.25              |
| A_68_P23260021 | chr4:122638391-122638435                          | NM_029662:19      | Mfsd2a     | INSIDE                 | 0.289                                           | 0.622                            | 1411.09             | 877.56              | 0.180                            | 1126.79             | 202.73              |
| A_68_P30497015 | chr15:102110224-102110272                         | NM_134100:362     | Mfsd5      | INSIDE                 | 0.258                                           | 0.596                            | 913.35              | 544.77              | 0.154                            | 766.22              | 117.76              |
| A_68_P27890038 | chr11:68369674-68369718                           | NM_146004:9       | Mfsd6l     | INSIDE                 | 0.263                                           | 0.598                            | 1064.35             | 636.58              | 0.157                            | 937.70              | 147.62              |
| A_68_P23972003 | chr5:108877737-108877781                          | NM_172883:152     | Mfsd7a     | INSIDE                 | 0.389                                           | 1.422                            | 4663.32             | 6629.61             | 0.553                            | 3380.56             | 1869.85             |
| A_68_P20935802 | chr1:192850220-192850264                          | NM_001081259:-173 | Mfsd7b     | PROMOTER               | 0.639                                           | 0.549                            | 952.00              | 523.08              | 0.351                            | 736.89              | 258.77              |
| A_68_P28605828 | chr12:87087327-87087371                           | NM_145447:-140    | Mfsd7c     | PROMOTER               | 0.259                                           | 0.650                            | 1866.08             | 1212.86             | 0.168                            | 1477.13             | 248.37              |
| A_68_P20593974 | chr1:129101586-129101630                          | NM_145128:46      | Mgat5      | INSIDE                 | 0.536                                           | 0.540                            | 1337.71             | 722.43              | 0.290                            | 1015.63             | 294.19              |
| A_68_P20593981 | chr1:129102201-129102245                          | NM_145128:660     | Mgat5      | INSIDE                 | 0.631                                           | 0.377                            | 2212.75             | 834.77              | 0.238                            | 1756.59             | 417.87              |
| A_68_P24623657 | chr6:88674155-88674204                            | NM_001166249:-226 | Mgl1       | PROMOTER               | 0.265                                           | 0.615                            | 910.30              | 559.40              | 0.163                            | 745.81              | 121.25              |
| A_68_P20804906 | chr1:169324243-169324289                          | NM_025569:-338    | Mgst3      | PROMOTER               | 0.173                                           | 0.684                            | 1301.21             | 889.97              | 0.118                            | 1005.60             | 119.00              |
| A_68_P33003685 | chr1_random:342475-342519                         | NM_177389:417     | Mia3       | INSIDE                 | 0.665                                           | 3.332                            | 950.43              | 3167.27             | 2.217                            | 815.73              | 1808.72             |
| A_68_P33003688 | chr1_random:342766-342810                         | NM_177389:125     | Mia3       | INSIDE                 | 0.421                                           | 0.625                            | 3157.26             | 1973.34             | 0.263                            | 2445.27             | 642.87              |
| A_68_P33003690 | chr1_random:342987-343031                         | NM_177389:-95     | Mia3       | PROMOTER               | 0.521                                           | 0.536                            | 3386.71             | 1814.67             | 0.279                            | 2521.96             | 703.67              |
| A_68_P23990800 | chr5:112657892-112657936                          | NR_003718:54      | Miat       | INSIDE                 | 0.299                                           | 0.533                            | 1405.27             | 749.37              | 0.160                            | 1059.02             | 168.97              |
| A_68_P25423373 | chr7:119369629-119369673                          | NM_001193305:301  | Mical2     | INSIDE                 | 0.559                                           | 0.707                            | 2118.24             | 1496.69             | 0.395                            | 1671.64             | 660.13              |
| A_68_P25423375 | chr7:119369796-119369840                          | NM_001193305:469  | Mical2     | INSIDE                 | 0.356                                           | 0.633                            | 1366.45             | 865.08              | 0.225                            | 1036.64             | 233.62              |
| A_68_P30364397 | chr15:78940024-78940068                           | NM_177461:634     | Micall1    | INSIDE                 | 0.639                                           | 0.394                            | 1481.73             | 584.52              | 0.252                            | 1163.41             | 293.34              |
| A_68_P24137287 | chr5:140212019-140212063                          | NM_174850:247     | Micall2    | INSIDE                 | 0.250                                           | 0.440                            | 2339.67             | 1029.16             | 0.110                            | 1809.68             | 198.77              |
| A_68_P24137290 | chr5:140212320-140212364                          | NM_174850:-55     | Micall2    | PROMOTER               | 0.243                                           | 0.659                            | 4096.08             | 2697.83             | 0.160                            | 3099.99             | 496.06              |
| A_68_P32252886 | chrX:10294260-10294304                            | NM_001166635:-208 | Mid1ip1    | PROMOTER               | 0.228                                           | 1.749                            | 3300.16             | 5771.56             | 0.400                            | 1260.09             | 503.43              |
| A_68_P32252888 | chrX:10294568-10294612                            | NM_001166635:100  | Mid1ip1    | INSIDE                 | 0.179                                           | 2.996                            | 2297.32             | 6882.51             | 0.536                            | 930.03              | 498.07              |
| A_68_P32252894 | chrX:10295292-10295336                            | NM_001166635:824  | Mid1ip1    | INSIDE                 | 0.172                                           | 1.365                            | 2864.83             | 3910.65             | 0.235                            | 1086.57             | 255.37              |
| A_68_P32252895 | chrX:10295371-10295422                            | NM_001166635:906  | Mid1ip1    | INSIDE                 | 0.134                                           | 1.498                            | 1469.74             | 2202.29             | 0.201                            | 584.01              | 117.45              |
| A_68_P32252897 | chrX:10295608-10295654                            | NM_001166635:1140 | Mid1ip1    | INSIDE                 | 0.562                                           | 0.691                            | 1207.34             | 834.01              | 0.388                            | 552.43              | 214.53              |
| A_68_P27281287 | chr10:79611758-79611802                           | NM_021565:746     | Midn       | INSIDE                 | 0.354                                           | 0.514                            | 2491.43             | 1281.64             | 0.182                            | 1725.91             | 314.69              |
| A_68_P27281289 | chr10:79611936-79611980                           | NM_021565:924     | Midn       | INSIDE                 | 0.280                                           | 0.643                            | 839.66              | 539.96              | 0.180                            | 664.72              | 119.56              |

| ProbeName      | Target position of probe on CpG island microarray | TargetID         | GeneSymbol | CpG island Description | Ratio of relative methylation (TiO2-NP/Vehicle) | Sham group                       |                     |                     | TiO <sub>2</sub> -H group        |                     |                     |
|----------------|---------------------------------------------------|------------------|------------|------------------------|-------------------------------------------------|----------------------------------|---------------------|---------------------|----------------------------------|---------------------|---------------------|
|                |                                                   |                  |            |                        |                                                 | Relative methylation (Cy-5/Cy-3) | Cy-3 signal (Input) | Cy-5 signal (MeDIP) | Relative methylation (Cy-5/Cy-3) | Cy-3 signal (Input) | Cy-5 signal (MeDIP) |
| A_68_P27281294 | chr10:79612495-79612539                           | NM_021565:1482   | Midn       | INSIDE                 | 0.144                                           | 0.575                            | 3449.71             | 1982.84             | 0.083                            | 2534.98             | 209.94              |
| A_68_P27281295 | chr10:79612639-79612683                           | NM_021565:1626   | Midn       | INSIDE                 | 0.205                                           | 0.381                            | 2238.43             | 853.50              | 0.078                            | 1564.83             | 122.55              |
| A_68_P27281301 | chr10:79613466-79613510                           | NM_021565:2454   | Midn       | INSIDE                 | 0.401                                           | 0.367                            | 1465.23             | 537.97              | 0.147                            | 1036.83             | 152.57              |
| A_68_P27281304 | chr10:79613780-79613824                           | NM_021565:2768   | Midn       | INSIDE                 | 0.448                                           | 0.690                            | 3230.35             | 2229.42             | 0.309                            | 2156.27             | 667.21              |
| A_68_P29330069 | chr13:112476100-112476144                         | NM_172593:-263   | Mier3      | PROMOTER               | 0.332                                           | 0.706                            | 1932.94             | 1364.94             | 0.235                            | 1389.53             | 326.18              |
| A_68_P29330079 | chr13:112477883-112477927                         | NM_172593:1519   | Mier3      | INSIDE                 | 0.310                                           | 0.295                            | 2250.96             | 664.54              | 0.092                            | 1566.96             | 143.38              |
| A_68_P29330296 | chr13:112515544-112515588                         | NM_172593:39181  | Mier3      | DOWNSTREAM             | 0.596                                           | 0.394                            | 1640.41             | 646.06              | 0.235                            | 1309.51             | 307.46              |
| A_68_P28154418 | chr11:115474202-115474246                         | NM_027162:-407   | Mif4gd     | PROMOTER               | 0.350                                           | 0.730                            | 2201.37             | 1607.70             | 0.256                            | 1623.92             | 415.03              |
| A_68_P23391035 | chr4:147242398-147242442                          | NM_001025365:408 | Miip       | INSIDE                 | 0.381                                           | 0.537                            | 1237.13             | 663.77              | 0.204                            | 1010.63             | 206.44              |
| A_68_P27901340 | chr11:70376701-70376745                           | NM_001045959:340 | Mink1      | INSIDE                 | 0.502                                           | 0.542                            | 3265.26             | 1769.89             | 0.272                            | 2467.73             | 671.72              |
| A_68_P29646483 | chr14:61403303-61403351                           | NM_027436:-76    | Mipep      | PROMOTER               | 0.363                                           | 0.587                            | 1104.41             | 648.00              | 0.213                            | 803.94              | 171.19              |
| A_68_P28461539 | chr12:58331901-58331948                           | NM_001164370:513 | Mipo1l     | INSIDE                 | 0.282                                           | 0.490                            | 1182.98             | 579.77              | 0.138                            | 918.97              | 126.93              |
| A_68_P23154636 | chr4:101028607-101028651                          | NR_029537:-8996  | Mir101a    | PROMOTER               | 0.186                                           | 0.564                            | 3032.52             | 1710.82             | 0.105                            | 2193.25             | 230.68              |
| A_68_P32383983 | chrX:50097448-50097492                            | NR_029657:-1726  | Mir106a    | PROMOTER               | 0.192                                           | 1.502                            | 1034.70             | 1553.93             | 0.288                            | 414.97              | 119.42              |
| A_68_P24129157 | chr5:138612451-138612495                          | NR_029658:-5426  | Mir106b    | PROMOTER               | 0.295                                           | 0.501                            | 2923.33             | 1464.32             | 0.148                            | 2009.96             | 297.20              |
| A_68_P24129161 | chr5:138612875-138612919                          | NR_029658:-5850  | Mir106b    | PROMOTER               | 0.427                                           | 0.734                            | 4243.44             | 3116.55             | 0.314                            | 2961.70             | 929.12              |
| A_68_P24129162 | chr5:138612940-138612988                          | NR_029658:-5918  | Mir106b    | PROMOTER               | 0.247                                           | 0.478                            | 1434.04             | 685.99              | 0.118                            | 1050.23             | 124.18              |
| A_68_P28043703 | chr11:96176215-96176259                           | NR_029784:-2242  | Mir10a     | PROMOTER               | 0.338                                           | 0.480                            | 1343.98             | 645.55              | 0.162                            | 1215.40             | 197.05              |
| A_68_P32016082 | chr19:23215759-23215803                           | NR_035423:-8140  | Mir1192    | PROMOTER               | 0.445                                           | 0.468                            | 2544.85             | 1192.17             | 0.209                            | 2104.26             | 438.85              |
| A_68_P32016093 | chr19:23217070-23217114                           | NR_035423:-6828  | Mir1192    | PROMOTER               | 0.255                                           | 0.536                            | 1149.74             | 616.62              | 0.137                            | 952.48              | 130.39              |
| A_68_P21906900 | chr2:180627890-180627934                          | NR_029538:-832   | Mir124a-3  | PROMOTER               | 0.370                                           | 0.452                            | 2903.67             | 1311.40             | 0.167                            | 2160.01             | 361.10              |
| A_68_P21906910 | chr2:180629073-180629117                          | NR_029538:350    | Mir124a-3  | DOWNSTREAM             | 0.139                                           | 0.570                            | 1948.81             | 1110.72             | 0.079                            | 1525.94             | 120.67              |
| A_68_P21906911 | chr2:180629180-180629224                          | NR_029538:458    | Mir124a-3  | DOWNSTREAM             | 0.420                                           | 0.570                            | 2546.98             | 1450.56             | 0.239                            | 2069.63             | 495.38              |
| A_68_P27924627 | chr11:74987037-74987081                           | NR_029546:-125   | Mir132     | PROMOTER               | 0.434                                           | 0.692                            | 2353.48             | 1629.06             | 0.300                            | 1962.89             | 589.02              |
| A_68_P24443347 | chr6:51220315-51220359                            | NR_029719:-427   | Mir148a    | PROMOTER               | 0.377                                           | 0.701                            | 1229.88             | 862.39              | 0.264                            | 928.52              | 245.22              |
| A_68_P28047118 | chr11:96711362-96711406                           | NR_029562:-322   | Mir152     | PROMOTER               | 0.156                                           | 0.708                            | 1874.02             | 1327.33             | 0.110                            | 1395.07             | 154.09              |
| A_68_P22218630 | chr3:68809433-68809477                            | NR_029529:-4239  | Mir15b     | PROMOTER               | 0.264                                           | 0.567                            | 1025.55             | 580.98              | 0.150                            | 802.95              | 120.16              |
| A_68_P26018638 | chr8:86707466-86707510                            | NR_029821:-4628  | Mir181c    | PROMOTER               | 0.609                                           | 0.570                            | 1613.66             | 920.38              | 0.348                            | 1165.56             | 405.13              |
| A_68_P26345184 | chr9:20841202-20841246                            | NR_035438:-4452  | Mir1900    | PROMOTER               | 0.152                                           | 0.572                            | 1863.06             | 1065.66             | 0.087                            | 1419.14             | 123.28              |
| A_68_P26345185 | chr9:20841278-20841322                            | NR_035438:-4528  | Mir1900    | PROMOTER               | 0.244                                           | 0.466                            | 1128.85             | 526.57              | 0.114                            | 1021.55             | 116.11              |
| A_68_P26345197 | chr9:20842972-20843016                            | NR_035438:-6222  | Mir1900    | PROMOTER               | 0.393                                           | 0.633                            | 1129.22             | 715.19              | 0.249                            | 905.51              | 225.62              |
| A_68_P26345199 | chr9:20843307-20843352                            | NR_035438:-6557  | Mir1900    | PROMOTER               | 0.349                                           | 0.485                            | 1410.84             | 684.42              | 0.169                            | 1051.61             | 178.19              |
| A_68_P22314346 | chr3:88340207-88340251                            | NR_035434:76     | Mir1905    | INSIDE                 | 0.299                                           | 0.671                            | 973.25              | 653.32              | 0.201                            | 734.20              | 147.55              |
| A_68_P27950592 | chr11:79524502-79524546                           | NR_029579:-946   | Mir193     | PROMOTER               | 0.527                                           | 0.481                            | 2598.95             | 1250.46             | 0.253                            | 1890.95             | 479.02              |
| A_68_P27950593 | chr11:79524583-79524627                           | NR_029579:-866   | Mir193     | PROMOTER               | 0.139                                           | 0.587                            | 2752.97             | 1614.84             | 0.081                            | 1959.04             | 159.29              |
| A_68_P27950599 | chr11:79525184-79525228                           | NR_029579:-264   | Mir193     | PROMOTER               | 0.533                                           | 0.346                            | 2199.70             | 761.37              | 0.184                            | 1904.29             | 351.12              |
| A_68_P27351981 | chr10:92624097-92624141                           | NR_035452:-1411  | Mir1931    | PROMOTER               | 0.394                                           | 0.461                            | 1435.67             | 661.71              | 0.182                            | 1234.00             | 224.27              |
| A_68_P28177556 | chr11:119251329-119251373                         | NR_035453:-435   | Mir1932    | PROMOTER               | 0.212                                           | 0.618                            | 1251.20             | 773.13              | 0.131                            | 1163.40             | 152.46              |
| A_68_P28177558 | chr11:119251624-119251668                         | NR_035453:-139   | Mir1932    | PROMOTER               | 0.286                                           | 0.462                            | 4271.84             | 1973.19             | 0.132                            | 3223.29             | 425.76              |
| A_68_P28377241 | chr12:40949707-40949751                           | NR_035459:-330   | Mir1938    | PROMOTER               | 0.184                                           | 0.548                            | 1762.34             | 966.09              | 0.101                            | 1301.25             | 131.05              |
| A_68_P30557333 | chr16:13448464-13448508                           | NR_030549:-1129  | Mir193b    | PROMOTER               | 0.534                                           | 0.562                            | 2408.52             | 1353.68             | 0.300                            | 1803.85             | 541.31              |
| A_68_P30557334 | chr16:13448585-13448633                           | NR_030549:-1007  | Mir193b    | PROMOTER               | 0.185                                           | 0.700                            | 1281.65             | 897.45              | 0.129                            | 931.67              | 120.61              |
| A_68_P30557335 | chr16:13448659-13448703                           | NR_030549:-935   | Mir193b    | PROMOTER               | 0.517                                           | 0.585                            | 3380.12             | 1976.05             | 0.302                            | 2588.96             | 782.22              |
| A_68_P29240037 | chr13:96095372-96095416                           | NR_035461:-5140  | Mir1940    | PROMOTER               | 0.603                                           | 0.517                            | 2115.72             | 1093.90             | 0.312                            | 1826.87             | 569.57              |

| ProbeName      | Target position of probe on CpG island microarray | TargetID        | GeneSymbol | CpG island Description | Ratio of relative methylation (TiO2-NP/Vehicle) | Sham group                       |                     |                     | TiO <sub>2</sub> -H group        |                     |                     |
|----------------|---------------------------------------------------|-----------------|------------|------------------------|-------------------------------------------------|----------------------------------|---------------------|---------------------|----------------------------------|---------------------|---------------------|
|                |                                                   |                 |            |                        |                                                 | Relative methylation (Cy-5/Cy-3) | Cy-3 signal (Input) | Cy-5 signal (MeDIP) | Relative methylation (Cy-5/Cy-3) | Cy-3 signal (Input) | Cy-5 signal (MeDIP) |
| A_68_P29240038 | chr13:96095444-96095488                           | NR_035461:-5068 | Mir1940    | PROMOTER               | 0.449                                           | 0.288                            | 2883.13             | 830.94              | 0.129                            | 1613.99             | 208.88              |
| A_68_P30547089 | chr16:11254525-11254569                           | NR_035466:-8    | Mir1945    | PROMOTER               | 0.334                                           | 0.565                            | 961.64              | 543.77              | 0.189                            | 806.61              | 152.19              |
| A_68_P25025263 | chr7:29870710-29870754                            | NR_035489:-2019 | Mir1963    | PROMOTER               | 0.651                                           | 2.608                            | 4466.52             | 11647.53            | 1.698                            | 2906.53             | 4936.17             |
| A_68_P26134879 | chr8:108137855-108137899                          | NR_035492:-1489 | Mir1966    | PROMOTER               | 0.369                                           | 0.547                            | 1646.97             | 901.33              | 0.202                            | 1453.38             | 293.57              |
| A_68_P24449267 | chr6:52180763-52180807                            | NR_029912:-620  | Mir196b    | PROMOTER               | 0.462                                           | 0.517                            | 1553.06             | 802.41              | 0.239                            | 1186.13             | 283.41              |
| A_68_P27285700 | chr10:80289932-80289982                           | NR_035503:-1585 | Mir1982    | PROMOTER               | 0.244                                           | 0.549                            | 1267.57             | 695.71              | 0.134                            | 870.10              | 116.62              |
| A_68_P21114608 | chr2:32167860-32167904                            | NR_029811:-6097 | Mir199b    | PROMOTER               | 0.061                                           | 0.545                            | 5383.54             | 2932.25             | 0.033                            | 3466.85             | 115.46              |
| A_68_P22858433 | chr4:40669503-40669547                            | NR_029594:-425  | Mir207     | PROMOTER               | 0.334                                           | 0.447                            | 2107.54             | 941.45              | 0.149                            | 1743.33             | 260.30              |
| A_68_P27924617 | chr11:74985774-74985818                           | NR_029794:-1093 | Mir212     | DIVERGENT_PROMOTER     | 0.215                                           | 0.495                            | 2420.60             | 1198.01             | 0.106                            | 1753.87             | 186.61              |
| A_68_P27924619 | chr11:74986101-74986145                           | NR_029794:-767  | Mir212     | DIVERGENT_PROMOTER     | 0.597                                           | 0.582                            | 3777.86             | 2199.81             | 0.348                            | 2972.84             | 1033.89             |
| A_68_P27924623 | chr11:74986635-74986679                           | NR_029794:-233  | Mir212     | DIVERGENT_PROMOTER     | 0.265                                           | 0.611                            | 1122.06             | 685.33              | 0.162                            | 738.36              | 119.43              |
| A_68_P27924624 | chr11:74986764-74986808                           | NR_029794:-103  | Mir212     | DIVERGENT_PROMOTER     | 0.370                                           | 0.589                            | 886.91              | 522.01              | 0.218                            | 675.07              | 146.83              |
| A_68_P27924625 | chr11:74986839-74986883                           | NR_029794:-29   | Mir212     | DIVERGENT_PROMOTER     | 0.658                                           | 0.565                            | 2361.24             | 1333.63             | 0.372                            | 2102.63             | 781.59              |
| A_68_P27924626 | chr11:74986914-74986958                           | NR_029794:47    | Mir212     | INSIDE                 | 0.198                                           | 0.542                            | 1497.93             | 811.22              | 0.107                            | 1161.17             | 124.24              |
| A_68_P31151557 | chr17:34162040-34162084                           | NR_029800:-25   | Mir219-1   | PROMOTER               | 0.653                                           | 0.618                            | 3317.33             | 2050.15             | 0.404                            | 2651.31             | 1070.63             |
| A_68_P31151558 | chr17:34162154-34162198                           | NR_029800:-139  | Mir219-1   | PROMOTER               | 0.229                                           | 0.552                            | 3826.60             | 2112.13             | 0.126                            | 2635.08             | 333.09              |
| A_68_P31151559 | chr17:34162253-34162297                           | NR_029800:-237  | Mir219-1   | PROMOTER               | 0.168                                           | 0.640                            | 2005.53             | 1284.41             | 0.108                            | 1479.66             | 159.47              |
| A_68_P31151560 | chr17:34162324-34162368                           | NR_029800:-309  | Mir219-1   | PROMOTER               | 0.520                                           | 0.563                            | 2440.44             | 1374.98             | 0.293                            | 1678.09             | 491.25              |
| A_68_P21099803 | chr2:29701365-29701409                            | NR_029838:-139  | Mir219-2   | PROMOTER               | 0.305                                           | 0.588                            | 2024.15             | 1190.18             | 0.179                            | 1455.66             | 260.99              |
| A_68_P21099809 | chr2:29701916-29701960                            | NR_029838:-691  | Mir219-2   | PROMOTER               | 0.278                                           | 0.609                            | 2809.15             | 1711.19             | 0.169                            | 1983.89             | 336.01              |
| A_68_P21099810 | chr2:29702001-29702045                            | NR_029838:-775  | Mir219-2   | PROMOTER               | 0.522                                           | 0.532                            | 1726.86             | 918.25              | 0.277                            | 1250.61             | 346.80              |
| A_68_P27926234 | chr11:75275864-75275908                           | NR_029739:-1331 | Mir22      | PROMOTER               | 0.494                                           | 0.502                            | 1393.46             | 699.44              | 0.248                            | 1145.59             | 284.29              |
| A_68_P26018712 | chr8:86722479-86722523                            | NR_029740:-9916 | Mir23a     | PROMOTER               | 0.297                                           | 0.641                            | 891.06              | 570.89              | 0.190                            | 782.87              | 148.91              |
| A_68_P20348304 | chr1:74438995-74439039                            | NR_029743:-1867 | Mir26b     | PROMOTER               | 0.249                                           | 0.593                            | 1025.19             | 607.94              | 0.148                            | 823.03              | 121.73              |
| A_68_P27992598 | chr11:86922877-86922926                           | NR_029652:-3604 | Mir301     | PROMOTER               | 0.251                                           | 0.671                            | 913.85              | 613.08              | 0.168                            | 698.71              | 117.62              |
| A_68_P27992600 | chr11:86923122-86923170                           | NR_029652:-3359 | Mir301     | PROMOTER               | 0.045                                           | 2.344                            | 1719.34             | 4029.52             | 0.107                            | 1095.49             | 116.69              |
| A_68_P27555852 | chr11:4035495-4035539                             | NR_037220:-3850 | Mir3060    | PROMOTER               | 0.172                                           | 0.532                            | 1746.82             | 929.11              | 0.092                            | 1272.87             | 116.62              |
| A_68_P28103510 | chr11:106648827-106648871                         | NR_037224:-4775 | Mir3064    | PROMOTER               | 0.306                                           | 0.692                            | 3660.83             | 2533.29             | 0.211                            | 2637.22             | 557.72              |
| A_68_P28103512 | chr11:106648993-106649037                         | NR_037224:-4941 | Mir3064    | PROMOTER               | 0.318                                           | 0.560                            | 914.62              | 512.44              | 0.178                            | 720.70              | 128.57              |
| A_68_P30722301 | chr16:44558812-44558856                           | NR_037242:-592  | Mir3081    | PROMOTER               | 0.617                                           | 0.662                            | 1582.35             | 1046.83             | 0.408                            | 1317.74             | 538.01              |
| A_68_P22312503 | chr3:88018770-88018821                            | NR_037276:-297  | Mir3093    | PROMOTER               | 0.617                                           | 0.495                            | 1146.59             | 567.86              | 0.306                            | 811.73              | 248.22              |
| A_68_P25015935 | chr7:27963726-27963770                            | NR_037283:-2636 | Mir3101    | PROMOTER               | 0.480                                           | 0.709                            | 1802.20             | 1277.94             | 0.341                            | 1472.34             | 501.47              |
| A_68_P26611007 | chr9:69301684-69301728                            | NR_037296:-3044 | Mir3109    | PROMOTER               | 0.183                                           | 0.550                            | 1407.39             | 774.53              | 0.101                            | 1161.21             | 116.77              |
| A_68_P29701297 | chr14:70843346-70843390                           | NR_029802:52    | Mir320     | INSIDE                 | 0.643                                           | 0.627                            | 994.33              | 623.54              | 0.403                            | 780.89              | 314.73              |
| A_68_P29701298 | chr14:70843425-70843469                           | NR_029802:130   | Mir320     | DOWNSTREAM             | 0.286                                           | 0.682                            | 3204.31             | 2185.44             | 0.195                            | 2370.08             | 462.40              |
| A_68_P29701300 | chr14:70843636-70843680                           | NR_029802:342   | Mir320     | DOWNSTREAM             | 0.291                                           | 0.415                            | 1340.23             | 556.11              | 0.121                            | 1026.45             | 123.74              |
| A_68_P32385499 | chrX:50410041-50410085                            | NR_029756:-2536 | Mir322     | PROMOTER               | 0.085                                           | 5.460                            | 8292.22             | 45276.10            | 0.462                            | 3869.76             | 1788.41             |
| A_68_P24992976 | chr7:19967388-19967432                            | NR_030759:-4581 | Mir343     | PROMOTER               | 0.469                                           | 0.538                            | 1121.89             | 603.12              | 0.252                            | 935.90              | 236.16              |
| A_68_P20351170 | chr1:74947336-74947380                            | NR_029876:-63   | Mir375     | PROMOTER               | 0.452                                           | 0.411                            | 2496.18             | 1026.47             | 0.186                            | 2081.25             | 386.55              |
| A_68_P27935699 | chr11:76891803-76891847                           | NR_030756:-150  | Mir423     | PROMOTER               | 0.234                                           | 0.649                            | 2118.19             | 1374.49             | 0.152                            | 1754.69             | 266.12              |
| A_68_P30501455 | chr15:102844938-102844988                         | NR_030526:-378  | Mir615     | PROMOTER               | 0.223                                           | 0.682                            | 1955.63             | 1334.50             | 0.152                            | 1482.50             | 225.64              |
| A_68_P32240001 | chrX:7327551-7327595                              | NR_030454:-2642 | Mir684-1   | DIVERGENT_PROMOTER     | 0.077                                           | 2.605                            | 4060.53             | 10578.59            | 0.200                            | 1527.46             | 304.95              |
| A_68_P32240002 | chrX:7327694-7327738                              | NR_030454:-2498 | Mir684-1   | DIVERGENT_PROMOTER     | 0.175                                           | 1.361                            | 1699.90             | 2314.19             | 0.239                            | 593.09              | 141.49              |
| A_68_P29613301 | chr14:55236421-55236465                           | NR_030457:-820  | Mir686     | PROMOTER               | 0.485                                           | 0.633                            | 1569.75             | 994.38              | 0.307                            | 1231.88             | 378.47              |

| ProbeName      | Target position of probe on CpG island microarray | TargetID          | GeneSymbol | CpG island Description | Ratio of relative methylation (TiO2-NP/Vehicle) | Sham group                       |                     |                     | TiO <sub>2</sub> -H group        |                     |                     |
|----------------|---------------------------------------------------|-------------------|------------|------------------------|-------------------------------------------------|----------------------------------|---------------------|---------------------|----------------------------------|---------------------|---------------------|
|                |                                                   |                   |            |                        |                                                 | Relative methylation (Cy-5/Cy-3) | Cy-3 signal (Input) | Cy-5 signal (MeDIP) | Relative methylation (Cy-5/Cy-3) | Cy-3 signal (Input) | Cy-5 signal (MeDIP) |
| A_68_P29613303 | chr14:55236595-55236639                           | NR_030457:-994    | Mir686     | PROMOTER               | 0.281                                           | 0.556                            | 1034.77             | 575.14              | 0.156                            | 921.06              | 143.94              |
| A_68_P29613305 | chr14:55236808-55236852                           | NR_030457:-1208   | Mir686     | PROMOTER               | 0.556                                           | 0.656                            | 1403.16             | 919.91              | 0.365                            | 1204.35             | 439.34              |
| A_68_P30499092 | chr15:102502227-102502271                         | NR_030460:49      | Mir688     | INSIDE                 | 0.347                                           | 0.636                            | 921.97              | 586.04              | 0.220                            | 662.62              | 145.96              |
| A_68_P30499097 | chr15:102502826-102502874                         | NR_030460:-553    | Mir688     | PROMOTER               | 0.205                                           | 0.601                            | 1299.35             | 780.72              | 0.123                            | 981.98              | 120.95              |
| A_68_P30499098 | chr15:102502893-102502944                         | NR_030460:-621    | Mir688     | PROMOTER               | 0.218                                           | 0.642                            | 2372.14             | 1523.12             | 0.140                            | 1712.84             | 239.71              |
| A_68_P24424404 | chr6:47763266-47763310                            | NR_030485:-9637   | Mir704     | PROMOTER               | 0.457                                           | 0.621                            | 1463.61             | 908.59              | 0.284                            | 1072.58             | 304.09              |
| A_68_P24424405 | chr6:47763384-47763429                            | NR_030485:-9755   | Mir704     | PROMOTER               | 0.147                                           | 0.427                            | 2688.43             | 1148.66             | 0.063                            | 1981.75             | 124.42              |
| A_68_P24796451 | chr6:119987387-119987431                          | NR_030487:-3079   | Mir706     | PROMOTER               | 0.135                                           | 0.530                            | 2312.86             | 1226.42             | 0.071                            | 1732.05             | 123.66              |
| A_68_P24796456 | chr6:119988018-119988063                          | NR_030487:-3711   | Mir706     | PROMOTER               | 0.271                                           | 0.640                            | 2373.74             | 1519.40             | 0.173                            | 1878.18             | 325.82              |
| A_68_P24796460 | chr6:119988597-119988641                          | NR_030487:-4289   | Mir706     | PROMOTER               | 0.205                                           | 0.575                            | 1994.68             | 1147.28             | 0.118                            | 1485.86             | 175.52              |
| A_68_P25257803 | chr7:86027612-86027656                            | NR_029826:-5528   | Mir7-2     | PROMOTER               | 0.592                                           | 0.595                            | 1051.81             | 625.68              | 0.352                            | 837.58              | 294.80              |
| A_68_P27788128 | chr11:50172669-50172713                           | NR_030529:-1309   | Mir804     | PROMOTER               | 0.257                                           | 0.575                            | 1876.93             | 1079.45             | 0.148                            | 1315.86             | 194.80              |
| A_68_P27788132 | chr11:50172976-50173028                           | NR_030529:-1621   | Mir804     | PROMOTER               | 0.180                                           | 0.654                            | 1286.76             | 841.29              | 0.118                            | 1003.26             | 118.06              |
| A_68_P22312508 | chr3:88019276-88019320                            | NR_029817:-221    | Mir9-1     | PROMOTER               | 0.588                                           | 0.675                            | 3063.02             | 2066.37             | 0.397                            | 2338.02             | 927.20              |
| A_68_P22312509 | chr3:88019343-88019387                            | NR_029817:-155    | Mir9-1     | PROMOTER               | 0.178                                           | 0.704                            | 1355.53             | 953.77              | 0.125                            | 941.17              | 118.08              |
| A_68_P29187684 | chr13:83884882-83884926                           | NR_029545:6486    | Mir9-2     | DOWNSTREAM             | 0.447                                           | 0.594                            | 1137.36             | 675.25              | 0.265                            | 980.16              | 260.10              |
| A_68_P22317994 | chr3:89031385-89031429                            | NR_030579:-286    | Mir92b     | DIVERGENT_PROMOTER     | 0.314                                           | 0.649                            | 1222.94             | 793.11              | 0.204                            | 839.30              | 170.98              |
| A_68_P25261460 | chr7:86649666-86649710                            | NR_029818:-461    | Mir9-3     | PROMOTER               | 0.526                                           | 0.659                            | 866.11              | 571.20              | 0.347                            | 708.77              | 245.94              |
| A_68_P25261467 | chr7:86650381-86650425                            | NR_029818:253     | Mir9-3     | DOWNSTREAM             | 0.173                                           | 0.587                            | 1804.05             | 1058.83             | 0.101                            | 1356.12             | 137.31              |
| A_68_P29020009 | chr13:48641246-48641290                           | NR_029725:-7627   | Mirlet7a-1 | PROMOTER               | 0.227                                           | 0.342                            | 1970.65             | 673.30              | 0.078                            | 1617.68             | 125.47              |
| A_68_P27903938 | chr11:70833216-70833260                           | NM_025993:126     | Mis12      | INSIDE                 | 0.584                                           | 0.426                            | 1984.46             | 845.79              | 0.249                            | 1636.81             | 407.41              |
| A_68_P27903939 | chr11:70833307-70833351                           | NM_025993:216     | Mis12      | INSIDE                 | 0.282                                           | 0.431                            | 1217.58             | 524.45              | 0.121                            | 981.65              | 119.22              |
| A_68_P20156457 | chr1:37947122-37947166                            | NM_026913:112     | Mitd1      | INSIDE                 | 0.328                                           | 0.498                            | 1063.49             | 529.09              | 0.163                            | 719.51              | 117.41              |
| A_68_P20877310 | chr1:182626954-182626998                          | NM_013729:189     | Mix11      | INSIDE                 | 0.220                                           | 0.511                            | 2298.80             | 1175.44             | 0.112                            | 1768.12             | 198.67              |
| A_68_P20877311 | chr1:182627122-182627166                          | NM_013729:21      | Mix11      | INSIDE                 | 0.556                                           | 0.675                            | 5597.45             | 3780.38             | 0.375                            | 4215.78             | 1582.74             |
| A_68_P20877313 | chr1:182627309-182627353                          | NM_013729:-165    | Mix11      | PROMOTER               | 0.554                                           | 0.623                            | 3579.75             | 2230.22             | 0.345                            | 2884.62             | 995.97              |
| A_68_P20551218 | chr1:120218342-120218386                          | NM_026472:-55     | Mki67ip    | PROMOTER               | 0.380                                           | 0.521                            | 1265.95             | 659.71              | 0.198                            | 1035.88             | 204.88              |
| A_68_P20551221 | chr1:120218602-120218646                          | NM_026472:205     | Mki67ip    | INSIDE                 | 0.267                                           | 0.557                            | 987.20              | 550.06              | 0.149                            | 789.50              | 117.28              |
| A_68_P21665425 | chr2:136717109-136717162                          | NM_001141946:7    | Mkks       | INSIDE                 | 0.221                                           | 0.647                            | 1087.20             | 703.64              | 0.143                            | 819.68              | 117.01              |
| A_68_P23226096 | chr4:115511583-115511632                          | NM_021461:-243    | Mknk1      | PROMOTER               | 0.269                                           | 0.576                            | 1032.04             | 594.16              | 0.155                            | 752.72              | 116.63              |
| A_68_P23226097 | chr4:115511687-115511731                          | NM_021461:-142    | Mknk1      | PROMOTER               | 0.464                                           | 0.598                            | 2361.22             | 1413.00             | 0.278                            | 1767.09             | 490.40              |
| A_68_P24771973 | chr6:115552217-115552261                          | NM_023290:283     | Mkrm2      | INSIDE                 | 0.354                                           | 0.694                            | 4289.30             | 2977.69             | 0.246                            | 3154.72             | 776.37              |
| A_68_P31475749 | chr18:7002345-7002389                             | NM_177595:2411    | Mkx        | INSIDE                 | 0.229                                           | 0.503                            | 1655.81             | 832.28              | 0.115                            | 1285.05             | 148.23              |
| A_68_P24008164 | chr5:115608110-115608154                          | NM_175403:53      | Mlec       | INSIDE                 | 0.335                                           | 0.375                            | 1561.27             | 585.26              | 0.125                            | 1484.05             | 186.17              |
| A_68_P24008165 | chr5:115608256-115608300                          | NM_175403:-93     | Mlec       | PROMOTER               | 0.630                                           | 0.384                            | 2003.34             | 770.11              | 0.242                            | 1630.56             | 395.04              |
| A_68_P30477055 | chr15:98701709-98701753                           | NM_001033276:-116 | MiI2       | PROMOTER               | 0.337                                           | 0.432                            | 1460.87             | 630.65              | 0.146                            | 1215.27             | 176.94              |
| A_68_P23547781 | chr5:25003445-25003504                            | NM_001081383:1127 | MiI3       | INSIDE                 | 0.230                                           | 0.613                            | 1029.87             | 631.36              | 0.141                            | 825.57              | 116.54              |
| A_68_P23547782 | chr5:25003584-25003633                            | NM_001081383:993  | MiI3       | INSIDE                 | 0.272                                           | 0.448                            | 1218.45             | 546.25              | 0.122                            | 988.33              | 120.52              |
| A_68_P23547790 | chr5:25005052-25005096                            | NM_001081383:-473 | MiI3       | DIVERGENT_PROMOTER     | 0.211                                           | 0.431                            | 1689.66             | 727.94              | 0.091                            | 1313.71             | 119.23              |
| A_68_P23536404 | chr5:22938833-22938877                            | NM_026984:-1392   | MiI5       | PROMOTER               | 0.316                                           | 1.442                            | 6877.37             | 9913.78             | 0.456                            | 4615.31             | 2104.90             |
| A_68_P23536409 | chr5:22939362-22939412                            | NM_026984:-860    | MiI5       | PROMOTER               | 0.194                                           | 0.629                            | 1221.10             | 768.58              | 0.122                            | 1003.10             | 122.52              |
| A_68_P23536410 | chr5:22939501-22939545                            | NM_026984:-724    | MiI5       | PROMOTER               | 0.153                                           | 0.549                            | 2304.38             | 1265.79             | 0.084                            | 1735.97             | 145.75              |
| A_68_P23536414 | chr5:22940038-22940082                            | NM_026984:-186    | MiI5       | PROMOTER               | 0.529                                           | 0.407                            | 1445.13             | 587.67              | 0.215                            | 1076.97             | 231.55              |
| A_68_P23536417 | chr5:22940364-22940408                            | NM_026984:140     | MiI5       | INSIDE                 | 0.221                                           | 0.425                            | 3661.06             | 1556.77             | 0.094                            | 2883.92             | 270.88              |

| ProbeName      | Target position of probe on CpG island microarray | TargetID          | GeneSymbol | CpG island Description | Ratio of relative methylation (TiO2-NP/Vehicle) | Sham group                       |                     |                     | TiO <sub>2</sub> -H group        |                     |                     |
|----------------|---------------------------------------------------|-------------------|------------|------------------------|-------------------------------------------------|----------------------------------|---------------------|---------------------|----------------------------------|---------------------|---------------------|
|                |                                                   |                   |            |                        |                                                 | Relative methylation (Cy-5/Cy-3) | Cy-3 signal (Input) | Cy-5 signal (MeDIP) | Relative methylation (Cy-5/Cy-3) | Cy-3 signal (Input) | Cy-5 signal (MeDIP) |
| A_68_P31259252 | chr17:57075335-57075382                           | NM_022328:-547    | Mllt1      | PROMOTER               | 0.307                                           | 0.600                            | 906.69              | 544.44              | 0.184                            | 647.94              | 119.41              |
| A_68_P21038062 | chr2:17979342-17979387                            | NM_010804:2467    | Mllt10     | INSIDE                 | 0.447                                           | 0.488                            | 2359.60             | 1151.21             | 0.218                            | 1771.60             | 386.70              |
| A_68_P21038121 | chr2:17986435-17986479                            | NM_010804:9559    | Mllt10     | INSIDE                 | 0.231                                           | 0.529                            | 2055.16             | 1088.18             | 0.122                            | 1603.82             | 196.13              |
| A_68_P23088441 | chr4:87677667-87677717                            | NM_027326:1619    | Mllt3      | INSIDE                 | 0.212                                           | 0.534                            | 1325.92             | 708.62              | 0.113                            | 1058.65             | 120.07              |
| A_68_P23088443 | chr4:87677902-87677949                            | NM_027326:1386    | Mllt3      | INSIDE                 | 0.050                                           | 1.378                            | 3132.38             | 4315.93             | 0.069                            | 2132.62             | 147.74              |
| A_68_P23088445 | chr4:87678149-87678193                            | NM_027326:1141    | Mllt3      | INSIDE                 | 0.097                                           | 1.463                            | 1250.70             | 1829.75             | 0.142                            | 851.33              | 121.23              |
| A_68_P23088447 | chr4:87678387-87678431                            | NM_027326:903     | Mllt3      | INSIDE                 | 0.516                                           | 0.708                            | 2138.29             | 1514.01             | 0.365                            | 1765.23             | 645.04              |
| A_68_P28071861 | chr11:100948728-100948772                         | NM_001159384:147  | Mlx        | INSIDE                 | 0.449                                           | 0.677                            | 2486.91             | 1683.29             | 0.304                            | 1903.81             | 578.81              |
| A_68_P24055452 | chr5:123845226-123845273                          | NM_177582:422     | Mlxip      | INSIDE                 | 0.269                                           | 0.612                            | 1275.11             | 780.85              | 0.165                            | 976.05              | 161.01              |
| A_68_P24114755 | chr5:135583039-135583083                          | NM_021455:278     | Mlxipl     | INSIDE                 | 0.595                                           | 0.605                            | 1122.30             | 678.59              | 0.360                            | 990.96              | 356.51              |
| A_68_P24114757 | chr5:135583228-135583272                          | NM_021455:468     | Mlxipl     | INSIDE                 | 0.178                                           | 0.696                            | 1265.56             | 880.64              | 0.124                            | 935.18              | 115.78              |
| A_68_P25993841 | chr8:81819136-81819180                            | NM_133823:-303    | Mmaa       | PROMOTER               | 0.173                                           | 0.565                            | 1655.96             | 936.07              | 0.098                            | 1177.56             | 115.08              |
| A_68_P25993842 | chr8:81819240-81819295                            | NM_133823:-412    | Mmaa       | PROMOTER               | 0.167                                           | 0.521                            | 1868.13             | 972.73              | 0.087                            | 1329.92             | 115.54              |
| A_68_P24004044 | chr5:114894084-114894128                          | NM_029956:-70     | Mmad       | DIVERGENT_PROMOTER     | 0.554                                           | 0.504                            | 1070.43             | 539.18              | 0.279                            | 929.38              | 259.14              |
| A_68_P28010558 | chr11:90110449-90110493                           | NM_026178:-319    | Mmd        | PROMOTER               | 0.285                                           | 0.653                            | 1230.30             | 802.83              | 0.186                            | 966.13              | 179.74              |
| A_68_P28010563 | chr11:90111119-90111163                           | NM_026178:351     | Mmd        | INSIDE                 | 0.182                                           | 0.537                            | 1392.39             | 747.76              | 0.098                            | 1216.44             | 119.17              |
| A_68_P24152505 | chr5:143084497-143084543                          | NM_175217:186     | Mmd2       | INSIDE                 | 0.165                                           | 0.645                            | 1646.80             | 1062.90             | 0.107                            | 1105.43             | 117.73              |
| A_68_P22190746 | chr3:63099501-63099545                            | NM_008604:-271    | Mme        | PROMOTER               | 0.525                                           | 0.555                            | 3999.99             | 2220.29             | 0.292                            | 3196.57             | 931.94              |
| A_68_P32396639 | chrX:53851315-53851359                            | NM_146234:-240    | Mmgt1      | PROMOTER               | 0.090                                           | 1.981                            | 2044.38             | 4050.73             | 0.179                            | 969.54              | 173.19              |
| A_68_P27855086 | chr11:62462305-62462349                           | NM_175002:161     | Mmgt2      | INSIDE                 | 0.273                                           | 0.670                            | 1593.12             | 1067.87             | 0.183                            | 1107.38             | 203.00              |
| A_68_P27855153 | chr11:62478528-62478583                           | NM_175002:16390   | Mmgt2      | INSIDE                 | 0.582                                           | 2.520                            | 1615.21             | 4069.55             | 1.466                            | 1313.96             | 1926.60             |
| A_68_P29612399 | chr14:55051483-55051527                           | NM_008608:1064    | Mmp14      | INSIDE                 | 0.293                                           | 0.657                            | 2064.39             | 1357.11             | 0.193                            | 1585.31             | 305.40              |
| A_68_P26082839 | chr8:97877231-97877275                            | NM_008609:1016    | Mmp15      | INSIDE                 | 0.528                                           | 0.638                            | 884.76              | 564.61              | 0.337                            | 719.94              | 242.36              |
| A_68_P26082840 | chr8:97877404-97877448                            | NM_008609:1190    | Mmp15      | INSIDE                 | 0.237                                           | 0.581                            | 1182.59             | 687.06              | 0.137                            | 876.63              | 120.49              |
| A_68_P22758679 | chr4:17780394-17780442                            | NM_019724:-210    | Mmp16      | PROMOTER               | 0.263                                           | 1.556                            | 704.55              | 1096.48             | 0.410                            | 614.72              | 251.83              |
| A_68_P24089919 | chr5:130089703-130089747                          | NM_011846:-364    | Mmp17      | PROMOTER               | 0.544                                           | 0.649                            | 3126.10             | 2027.88             | 0.353                            | 2301.27             | 812.81              |
| A_68_P24089926 | chr5:130090512-130090556                          | NM_011846:446     | Mmp17      | INSIDE                 | 0.547                                           | 0.421                            | 1943.77             | 818.03              | 0.230                            | 1667.85             | 383.78              |
| A_68_P26068080 | chr8:95351388-95351432                            | NM_008610:184     | Mmp2       | INSIDE                 | 0.624                                           | 0.530                            | 1233.21             | 653.13              | 0.330                            | 971.02              | 320.76              |
| A_68_P23439841 | chr4:155027081-155027125                          | NM_011985:391     | Mmp23      | INSIDE                 | 0.621                                           | 0.721                            | 3407.25             | 2456.30             | 0.448                            | 2512.20             | 1125.54             |
| A_68_P23439844 | chr4:155027433-155027477                          | NM_011985:39      | Mmp23      | INSIDE                 | 0.160                                           | 0.664                            | 1677.61             | 1114.23             | 0.106                            | 1142.94             | 121.64              |
| A_68_P21767513 | chr2:155601572-155601616                          | NM_010808:515     | Mmp24      | INSIDE                 | 0.236                                           | 1.833                            | 7977.50             | 14624.27            | 0.433                            | 5165.28             | 2239.08             |
| A_68_P21820676 | chr2:164774969-164775013                          | NM_013599:1240    | Mmp9       | INSIDE                 | 0.081                                           | 1.346                            | 3257.25             | 4385.41             | 0.110                            | 2138.71             | 234.40              |
| A_68_P22785948 | chr4:24423938-24423984                            | NM_199467:352     | Mms221     | INSIDE                 | 0.345                                           | 0.554                            | 922.74              | 511.39              | 0.191                            | 630.84              | 120.57              |
| A_68_P23985659 | chr5:111846818-111846862                          | NM_001081235:-345 | Mn1        | PROMOTER               | 0.537                                           | 0.453                            | 1403.31             | 635.91              | 0.243                            | 1104.49             | 268.77              |
| A_68_P23985662 | chr5:111847249-111847293                          | NM_001081235:85   | Mn1        | INSIDE                 | 0.389                                           | 0.733                            | 1915.89             | 1404.16             | 0.285                            | 1480.94             | 422.52              |
| A_68_P23985663 | chr5:111847362-111847406                          | NM_001081235:199  | Mn1        | INSIDE                 | 0.421                                           | 0.575                            | 1005.17             | 578.01              | 0.242                            | 781.17              | 189.07              |
| A_68_P23985671 | chr5:111848092-111848136                          | NM_001081235:929  | Mn1        | INSIDE                 | 0.294                                           | 0.648                            | 3672.91             | 2380.26             | 0.191                            | 2489.23             | 474.22              |
| A_68_P23985674 | chr5:111848466-111848510                          | NM_001081235:1303 | Mn1        | INSIDE                 | 0.377                                           | 0.643                            | 1622.85             | 1042.79             | 0.242                            | 1169.35             | 283.36              |
| A_68_P22289190 | chr3:83959655-83959699                            | NM_029797:32      | Mnd1       | INSIDE                 | 0.625                                           | 0.562                            | 2696.81             | 1514.78             | 0.351                            | 2103.73             | 738.87              |
| A_68_P22289192 | chr3:83959834-83959879                            | NM_029797:-148    | Mnd1       | PROMOTER               | 0.241                                           | 0.577                            | 1528.94             | 881.90              | 0.139                            | 1204.95             | 167.29              |
| A_68_P27922700 | chr11:74645583-74645627                           | NM_010813:1179    | Mnt        | INSIDE                 | 0.593                                           | 0.482                            | 1154.05             | 556.61              | 0.286                            | 1009.08             | 288.46              |
| A_68_P27922753 | chr11:74651662-74651706                           | NM_010813:7259    | Mnt        | INSIDE                 | 0.265                                           | 0.537                            | 1150.75             | 617.92              | 0.142                            | 851.75              | 121.25              |
| A_68_P27922757 | chr11:74652026-74652070                           | NM_010813:7623    | Mnt        | INSIDE                 | 0.276                                           | 0.595                            | 1916.07             | 1140.92             | 0.164                            | 1581.50             | 259.85              |
| A_68_P23567756 | chr5:29800752-29800798                            | NM_019944:4236    | Mnx1       | INSIDE                 | 0.268                                           | 1.501                            | 821.61              | 1232.99             | 0.402                            | 556.60              | 223.56              |

| ProbeName      | Target position of probe on CpG island microarray | TargetID          | GeneSymbol | CpG island Description | Ratio of relative methylation (TiO2-NP/Vehicle) | Sham group                       |                     |                     | TiO <sub>2</sub> -H group        |                     |                     |
|----------------|---------------------------------------------------|-------------------|------------|------------------------|-------------------------------------------------|----------------------------------|---------------------|---------------------|----------------------------------|---------------------|---------------------|
|                |                                                   |                   |            |                        |                                                 | Relative methylation (Cy-5/Cy-3) | Cy-3 signal (Input) | Cy-5 signal (MeDIP) | Relative methylation (Cy-5/Cy-3) | Cy-3 signal (Input) | Cy-5 signal (MeDIP) |
| A_68_P23567792 | chr5:29805215-29805259                            | NM_019944:-226    | Mnx1       | PROMOTER               | 0.432                                           | 0.649                            | 2226.04             | 1445.38             | 0.281                            | 1642.90             | 460.89              |
| A_68_P28693441 | chr12:103981601-103981648                         | NM_001142937:246  | Moap1      | INSIDE                 | 0.195                                           | 0.666                            | 1141.53             | 760.21              | 0.130                            | 952.75              | 123.70              |
| A_68_P24592786 | chr6:83276392-83276436                            | NM_145571:382     | Mobk11b    | INSIDE                 | 0.550                                           | 0.506                            | 1381.30             | 698.94              | 0.278                            | 1160.57             | 322.90              |
| A_68_P27284924 | chr10:80164367-80164423                           | NM_172457:171     | Mobk12a    | INSIDE                 | 0.301                                           | 0.506                            | 1100.89             | 556.99              | 0.153                            | 794.12              | 121.12              |
| A_68_P31222784 | chr17:49567933-49567977                           | NM_020042:266     | Mocs1      | INSIDE                 | 0.258                                           | 0.623                            | 1012.45             | 631.16              | 0.161                            | 833.11              | 134.07              |
| A_68_P29348446 | chr13:115608303-115608349                         | NM_001113374:-118 | Mocs2      | PROMOTER               | 0.221                                           | 0.625                            | 1209.20             | 755.22              | 0.138                            | 874.37              | 120.87              |
| A_68_P29348448 | chr13:115608501-115608545                         | NM_001113374:78   | Mocs2      | INSIDE                 | 0.095                                           | 0.685                            | 3500.56             | 2396.99             | 0.065                            | 2555.47             | 166.97              |
| A_68_P29348449 | chr13:115608614-115608659                         | NM_001113374:192  | Mocs2      | INSIDE                 | 0.325                                           | 0.651                            | 973.07              | 633.63              | 0.211                            | 793.11              | 167.72              |
| A_68_P26811671 | chr9:107804092-107804136                          | NM_028369:13655   | Mon1a      | INSIDE                 | 0.612                                           | 0.601                            | 994.45              | 597.82              | 0.368                            | 768.57              | 282.58              |
| A_68_P27553117 | chr11:3549252-3549296                             | NM_001159288:-222 | Morc2a     | DIVERGENT_PROMOTER     | 0.428                                           | 0.415                            | 1488.45             | 617.90              | 0.178                            | 1220.63             | 217.11              |
| A_68_P27553119 | chr11:3549485-3549529                             | NM_198162:-9196   | Morc2a     | PROMOTER               | 0.440                                           | 0.401                            | 2147.12             | 860.50              | 0.176                            | 1708.81             | 301.18              |
| A_68_P30977847 | chr16:93832195-93832251                           | NM_001045529:-143 | Morc3      | PROMOTER               | 0.168                                           | 0.605                            | 1539.24             | 931.50              | 0.101                            | 1154.19             | 117.05              |
| A_68_P32696393 | chrX:136405600-136405644                          | NM_001193309:571  | Morc4      | INSIDE                 | 0.290                                           | 1.434                            | 3195.96             | 4582.39             | 0.415                            | 1254.52             | 520.76              |
| A_68_P32696394 | chrX:136405677-136405721                          | NM_001193309:495  | Morc4      | INSIDE                 | 0.101                                           | 1.642                            | 2535.81             | 4164.73             | 0.166                            | 1103.02             | 182.57              |
| A_68_P32696398 | chrX:136406178-136406222                          | NM_001193309:-7   | Morc4      | PROMOTER               | 0.168                                           | 1.980                            | 2753.63             | 5451.06             | 0.332                            | 1044.26             | 346.92              |
| A_68_P26716008 | chr9:90008880-90008924                            | NM_001039147:756  | Morf411    | INSIDE                 | 0.530                                           | 0.675                            | 5682.17             | 3835.14             | 0.358                            | 4100.41             | 1466.62             |
| A_68_P26716009 | chr9:90009071-90009118                            | NM_001039147:564  | Morf411    | INSIDE                 | 0.453                                           | 0.666                            | 964.42              | 642.65              | 0.302                            | 718.09              | 216.88              |
| A_68_P26716011 | chr9:90009342-90009386                            | NM_001039147:294  | Morf411    | INSIDE                 | 0.264                                           | 1.700                            | 6468.15             | 10998.33            | 0.448                            | 4107.86             | 1841.19             |
| A_68_P26716013 | chr9:90009639-90009683                            | NM_001039147:-2   | Morf411    | PROMOTER               | 0.569                                           | 0.544                            | 1835.28             | 998.48              | 0.310                            | 1452.06             | 449.68              |
| A_68_P32682200 | chrX:133276451-133276498                          | NM_019768:-326    | Morf412    | PROMOTER               | 0.210                                           | 2.160                            | 1277.76             | 2760.01             | 0.454                            | 556.76              | 252.51              |
| A_68_P24126542 | chr5:138041887-138041931                          | NM_030037:360     | Mospd3     | INSIDE                 | 0.420                                           | 0.710                            | 3325.86             | 2360.03             | 0.298                            | 2661.94             | 794.19              |
| A_68_P24126543 | chr5:138042018-138042062                          | NM_030037:228     | Mospd3     | INSIDE                 | 0.647                                           | 0.583                            | 1499.36             | 874.05              | 0.377                            | 1140.88             | 430.06              |
| A_68_P26204794 | chr8:120325573-120325617                          | NM_026758:235     | Mphosph6   | INSIDE                 | 0.652                                           | 0.561                            | 1212.15             | 679.99              | 0.366                            | 1011.10             | 369.93              |
| A_68_P26204800 | chr8:120326079-120326123                          | NM_026758:-271    | Mphosph6   | PROMOTER               | 0.375                                           | 0.560                            | 1128.23             | 632.06              | 0.210                            | 997.82              | 209.56              |
| A_68_P26204801 | chr8:120326174-120326218                          | NM_026758:-367    | Mphosph6   | PROMOTER               | 0.266                                           | 0.505                            | 1151.05             | 581.37              | 0.135                            | 911.11              | 122.60              |
| A_68_P29624050 | chr14:57287581-57287630                           | NM_023773:521     | Mphosph8   | INSIDE                 | 0.103                                           | 1.468                            | 1563.36             | 2294.48             | 0.151                            | 1049.13             | 158.53              |
| A_68_P26542420 | chr9:57400417-57400461                            | NM_025837:121     | Mpi        | INSIDE                 | 0.218                                           | 0.632                            | 1306.03             | 824.99              | 0.138                            | 889.75              | 122.52              |
| A_68_P32470782 | chrX:72376286-72376330                            | NM_008621:-20     | Mpp1       | PROMOTER               | 0.169                                           | 1.549                            | 3268.88             | 5064.48             | 0.262                            | 1340.62             | 350.77              |
| A_68_P28077432 | chr11:101948559-101948603                         | NM_016695:1249    | Mpp2       | INSIDE                 | 0.231                                           | 0.591                            | 1080.73             | 639.08              | 0.137                            | 843.37              | 115.31              |
| A_68_P28077443 | chr11:101949878-101949922                         | NM_016695:-71     | Mpp2       | PROMOTER               | 0.233                                           | 0.589                            | 3476.25             | 2048.62             | 0.138                            | 2582.86             | 355.15              |
| A_68_P28077065 | chr11:101887780-101887824                         | NM_007863:467     | Mpp3       | INSIDE                 | 0.138                                           | 0.486                            | 2188.74             | 1063.17             | 0.067                            | 1777.48             | 118.97              |
| A_68_P28077066 | chr11:101887900-101887944                         | NM_007863:347     | Mpp3       | INSIDE                 | 0.499                                           | 0.653                            | 1395.17             | 911.44              | 0.326                            | 1050.26             | 342.28              |
| A_68_P28565713 | chr12:79849962-79850008                           | NM_019579:51      | Mpp5       | INSIDE                 | 0.128                                           | 1.530                            | 971.41              | 1486.55             | 0.196                            | 804.23              | 157.64              |
| A_68_P21501826 | chr2:106534164-106534208                          | NM_029837:-1571   | Mpped2     | PROMOTER               | 0.255                                           | 0.694                            | 2711.45             | 1882.62             | 0.177                            | 2027.49             | 358.99              |
| A_68_P21501839 | chr2:106535501-106535545                          | NM_029837:-235    | Mpped2     | PROMOTER               | 0.467                                           | 0.609                            | 1671.72             | 1017.64             | 0.284                            | 1385.85             | 394.21              |
| A_68_P27838142 | chr11:59475681-59475726                           | NM_012027:-293    | Mpprip     | PROMOTER               | 0.590                                           | 0.489                            | 2725.32             | 1333.89             | 0.289                            | 2117.86             | 611.96              |
| A_68_P27838143 | chr11:59475883-59475927                           | NM_012027:-92     | Mpprip     | PROMOTER               | 0.291                                           | 0.608                            | 848.32              | 515.51              | 0.177                            | 678.35              | 119.82              |
| A_68_P27838147 | chr11:59476518-59476570                           | NM_012027:548     | Mpprip     | INSIDE                 | 0.078                                           | 1.462                            | 1401.86             | 2049.00             | 0.114                            | 1050.26             | 120.02              |
| A_68_P30359737 | chr15:78236916-78236960                           | NM_001162493:-203 | Mpst       | DIVERGENT_PROMOTER     | 0.253                                           | 0.601                            | 1041.60             | 626.15              | 0.152                            | 787.95              | 119.64              |
| A_68_P30359739 | chr15:78237110-78237154                           | NM_001162493:-9   | Mpst       | DIVERGENT_PROMOTER     | 0.395                                           | 0.517                            | 1965.86             | 1015.55             | 0.204                            | 1519.10             | 309.59              |
| A_68_P30359767 | chr15:78240574-78240618                           | NM_138670:3063    | Mpst       | INSIDE                 | 0.401                                           | 0.682                            | 1086.67             | 740.80              | 0.274                            | 845.19              | 231.31              |
| A_68_P30359769 | chr15:78240781-78240825                           | NM_138670:3269    | Mpst       | INSIDE                 | 0.381                                           | 0.617                            | 1060.37             | 654.13              | 0.235                            | 771.69              | 181.47              |
| A_68_P30559668 | chr16:13941247-13941291                           | NM_033564:481     | Mpv171     | INSIDE                 | 0.121                                           | 0.701                            | 2164.81             | 1518.24             | 0.085                            | 1616.77             | 137.42              |
| A_68_P25953851 | chr8:73284450-73284494                            | NM_183170:348     | Mpv172     | INSIDE                 | 0.314                                           | 0.634                            | 957.66              | 607.23              | 0.199                            | 768.90              | 153.06              |

| ProbeName      | Target position of probe on CpG island microarray | TargetID          | GeneSymbol | CpG island Description | Ratio of relative methylation (TiO2-NP/Vehicle) | Sham group                       |                     |                     |                                  | TiO <sub>2</sub> -H group |                     |  |
|----------------|---------------------------------------------------|-------------------|------------|------------------------|-------------------------------------------------|----------------------------------|---------------------|---------------------|----------------------------------|---------------------------|---------------------|--|
|                |                                                   |                   |            |                        |                                                 | Relative methylation (Cy-5/Cy-3) | Cy-3 signal (Input) | Cy-5 signal (MeDIP) | Relative methylation (Cy-5/Cy-3) | Cy-3 signal (Input)       | Cy-5 signal (MeDIP) |  |
| A_68_P25953855 | chr8:73284899-73284943                            | NM_183170:-100    | Mpv17l2    | PROMOTER               | 0.405                                           | 0.408                            | 2453.08             | 1000.94             | 0.165                            | 1787.56                   | 295.51              |  |
| A_68_P20795497 | chr1:167564136-167564180                          | NM_001001880:514  | Mpz1l      | INSIDE                 | 0.624                                           | 0.675                            | 1095.66             | 739.84              | 0.421                            | 918.17                    | 386.86              |  |
| A_68_P26319355 | chr9:14588836-14588880                            | NM_018736:-292    | Mre11a     | DIVERGENT_PROMOTER     | 0.390                                           | 0.581                            | 1999.35             | 1161.35             | 0.227                            | 1453.26                   | 329.26              |  |
| A_68_P23609669 | chr5:37187204-37187251                            | NM_026242:766     | Mrfap1     | INSIDE                 | 0.199                                           | 0.677                            | 1172.98             | 794.28              | 0.135                            | 880.28                    | 118.67              |  |
| A_68_P23609675 | chr5:37187966-37188010                            | NM_026242:5       | Mrfap1     | INSIDE                 | 0.465                                           | 0.470                            | 1789.03             | 840.97              | 0.219                            | 1560.60                   | 341.40              |  |
| A_68_P26019014 | chr8:86780727-86780772                            | NM_026423:474     | Mri1       | INSIDE                 | 0.275                                           | 1.820                            | 1382.34             | 2516.20             | 0.500                            | 1033.50                   | 516.86              |  |
| A_68_P29630112 | chr14:58445036-58445080                           | NM_026401:-17     | Mrp63      | DIVERGENT_PROMOTER     | 0.238                                           | 0.635                            | 987.47              | 627.24              | 0.151                            | 835.14                    | 126.44              |  |
| A_68_P23905255 | chr5:96638963-96639007                            | NM_001039084:-149 | Mrpl1      | PROMOTER               | 0.502                                           | 0.715                            | 1586.70             | 1133.80             | 0.359                            | 1245.38                   | 446.86              |  |
| A_68_P23905257 | chr5:96639210-96639261                            | NM_001039084:102  | Mrpl1      | INSIDE                 | 0.283                                           | 0.603                            | 1236.33             | 745.79              | 0.171                            | 1003.15                   | 171.15              |  |
| A_68_P31926078 | chr19:4962474-4962518                             | NM_025553:191     | Mrpl11     | INSIDE                 | 0.329                                           | 0.617                            | 1433.26             | 883.99              | 0.203                            | 1195.39                   | 242.70              |  |
| A_68_P28184854 | chr1:120345796-120345840                          | NM_027204:-164    | Mrpl12     | PROMOTER               | 0.308                                           | 0.415                            | 1306.21             | 542.07              | 0.128                            | 973.52                    | 124.46              |  |
| A_68_P30232953 | chr15:55388796-55388840                           | NM_026759:49      | Mrpl13     | INSIDE                 | 0.413                                           | 0.473                            | 2660.21             | 1257.09             | 0.195                            | 2051.67                   | 400.62              |  |
| A_68_P31202532 | chr17:45823669-45823714                           | NM_026732:371     | Mrpl14     | INSIDE                 | 0.253                                           | 0.738                            | 2348.99             | 1732.95             | 0.187                            | 1638.74                   | 306.16              |  |
| A_68_P25394533 | chr7:112959197-112959241                          | NM_025301:383     | Mrpl17     | INSIDE                 | 0.179                                           | 0.522                            | 1705.03             | 890.18              | 0.093                            | 1259.14                   | 117.49              |  |
| A_68_P25394534 | chr7:112959304-112959348                          | NM_025301:275     | Mrpl17     | INSIDE                 | 0.482                                           | 0.653                            | 1215.91             | 794.16              | 0.315                            | 937.64                    | 295.07              |  |
| A_68_P25394540 | chr7:112959842-112959886                          | NM_025301:-263    | Mrpl17     | PROMOTER               | 0.062                                           | 0.675                            | 4014.69             | 2708.01             | 0.042                            | 2894.92                   | 120.14              |  |
| A_68_P31055436 | chr17:13109119-13109167                           | NM_026310:-185    | Mrpl18     | DIVERGENT_PROMOTER     | 0.178                                           | 0.692                            | 1534.51             | 1061.22             | 0.123                            | 1131.07                   | 139.01              |  |
| A_68_P31055437 | chr17:13109036-13109080                           | NM_026310:-101    | Mrpl18     | DIVERGENT_PROMOTER     | 0.161                                           | 0.518                            | 1969.15             | 1019.98             | 0.083                            | 1380.44                   | 115.13              |  |
| A_68_P31055438 | chr17:13108951-13108995                           | NM_026310:-15     | Mrpl18     | DIVERGENT_PROMOTER     | 0.246                                           | 0.555                            | 2004.58             | 1111.78             | 0.137                            | 1378.10                   | 188.36              |  |
| A_68_P31055439 | chr17:13108867-13108911                           | NM_026310:69      | Mrpl18     | INSIDE                 | 0.306                                           | 0.391                            | 1728.34             | 675.39              | 0.119                            | 1306.05                   | 155.93              |  |
| A_68_P22310708 | chr3:87723736-87723780                            | NM_026591:293     | Mrpl24     | INSIDE                 | 0.185                                           | 0.613                            | 1347.00             | 826.36              | 0.113                            | 1023.99                   | 116.13              |  |
| A_68_P28839394 | chr13:14705133-14705177                           | NM_029271:150     | Mrpl32     | INSIDE                 | 0.661                                           | 0.567                            | 912.05              | 517.10              | 0.375                            | 814.12                    | 305.27              |  |
| A_68_P23579047 | chr5:31916324-31916368                            | NM_025796:23      | Mrpl33     | INSIDE                 | 0.295                                           | 0.611                            | 1447.93             | 884.64              | 0.180                            | 1142.65                   | 205.92              |  |
| A_68_P23188355 | chr4:106739488-106739543                          | NM_025500:-44     | Mrpl37     | DIVERGENT_PROMOTER     | 0.281                                           | 0.506                            | 1134.27             | 573.53              | 0.142                            | 858.86                    | 121.88              |  |
| A_68_P23188357 | chr4:106739700-106739748                          | NM_025500:-253    | Mrpl37     | DIVERGENT_PROMOTER     | 0.188                                           | 0.589                            | 1769.24             | 1042.63             | 0.111                            | 1397.62                   | 154.83              |  |
| A_68_P23188358 | chr4:106739774-106739823                          | NM_025500:-327    | Mrpl37     | DIVERGENT_PROMOTER     | 0.351                                           | 0.625                            | 3049.70             | 1907.51             | 0.219                            | 2132.82                   | 468.02              |  |
| A_68_P28157575 | chr1:115999733-115999777                          | NM_024177:428     | Mrpl38     | INSIDE                 | 0.584                                           | 0.723                            | 2131.30             | 1540.49             | 0.422                            | 1658.02                   | 700.46              |  |
| A_68_P28157577 | chr1:115999946-115999990                          | NM_024177:214     | Mrpl38     | INSIDE                 | 0.398                                           | 0.493                            | 3724.44             | 1836.53             | 0.196                            | 2843.38                   | 558.00              |  |
| A_68_P26344986 | chr9:20807641-20807685                            | NM_023167:482     | Mrpl4      | INSIDE                 | 0.148                                           | 0.579                            | 2912.47             | 1686.79             | 0.086                            | 2153.49                   | 184.72              |  |
| A_68_P21069127 | chr2:24830756-24830800                            | NM_001031808:-160 | Mrpl41     | DIVERGENT_PROMOTER     | 0.303                                           | 0.401                            | 1398.91             | 561.51              | 0.122                            | 991.06                    | 120.44              |  |
| A_68_P22039663 | chr3:32635419-32635463                            | NM_029017:237     | Mrpl47     | INSIDE                 | 0.220                                           | 0.602                            | 1443.47             | 868.54              | 0.132                            | 1078.72                   | 142.90              |  |
| A_68_P25368570 | chr7:107731384-107731428                          | NM_198831:238     | Mrpl48     | INSIDE                 | 0.087                                           | 0.577                            | 3498.30             | 2017.03             | 0.050                            | 2586.56                   | 129.01              |  |
| A_68_P25368688 | chr7:107756761-107756805                          | NR_003559:-272    | Mrpl48     | PROMOTER               | 0.433                                           | 0.488                            | 1437.47             | 702.13              | 0.212                            | 1100.89                   | 233.06              |  |
| A_68_P24819300 | chr6:125141938-125141982                          | NM_025595:-257    | Mrpl51     | DIVERGENT_PROMOTER     | 0.185                                           | 0.667                            | 1176.60             | 784.24              | 0.124                            | 953.32                    | 117.85              |  |
| A_68_P24591483 | chr6:83058946-83058997                            | NM_026744:-130    | Mrpl53     | PROMOTER               | 0.247                                           | 0.554                            | 1065.49             | 590.41              | 0.137                            | 862.94                    | 117.92              |  |
| A_68_P24591488 | chr6:83059493-83059537                            | NM_026744:413     | Mrpl53     | INSIDE                 | 0.253                                           | 0.554                            | 992.61              | 550.16              | 0.140                            | 842.28                    | 117.95              |  |
| A_68_P27835445 | chr1:59016315-59016359                            | NM_026035:318     | Mrpl55     | INSIDE                 | 0.239                                           | 0.638                            | 825.75              | 526.60              | 0.153                            | 794.02                    | 121.16              |  |
| A_68_P22339047 | chr3:94247097-94247141                            | NM_030116:-139    | Mrpl9      | DIVERGENT_PROMOTER     | 0.665                                           | 0.700                            | 1718.75             | 1203.68             | 0.466                            | 1528.25                   | 711.60              |  |
| A_68_P22339050 | chr3:94247442-94247486                            | NM_030116:207     | Mrpl9      | INSIDE                 | 0.467                                           | 0.706                            | 2630.32             | 1858.27             | 0.330                            | 2047.71                   | 676.03              |  |
| A_68_P22339052 | chr3:94247698-94247742                            | NM_030116:463     | Mrpl9      | INSIDE                 | 0.283                                           | 0.443                            | 1707.10             | 755.57              | 0.125                            | 1209.25                   | 151.40              |  |
| A_68_P20765301 | chr1:162125216-162125275                          | NM_025474:-145    | Mrps14     | PROMOTER               | 0.175                                           | 0.647                            | 2204.54             | 1426.05             | 0.113                            | 1582.08                   | 178.69              |  |
| A_68_P23277861 | chr4:125724192-125724236                          | NM_025544:43      | Mrps15     | INSIDE                 | 0.339                                           | 0.569                            | 1751.68             | 996.75              | 0.193                            | 1354.29                   | 261.39              |  |
| A_68_P29446629 | chr14:21212600-21212644                           | NM_025440:155     | Mrps16     | INSIDE                 | 0.196                                           | 0.543                            | 1403.41             | 761.67              | 0.106                            | 1137.12                   | 120.71              |  |
| A_68_P29446632 | chr14:21212949-21212993                           | NM_025440:-193    | Mrps16     | PROMOTER               | 0.354                                           | 0.325                            | 2585.87             | 839.18              | 0.115                            | 2020.51                   | 232.14              |  |

| ProbeName      | Target position of probe on CpG island microarray | TargetID          | GeneSymbol | CpG island Description | Ratio of relative methylation (TiO2-NP/Vehicle) | Sham group                       |                     |                     | TiO <sub>2</sub> -H group        |                     |                     |
|----------------|---------------------------------------------------|-------------------|------------|------------------------|-------------------------------------------------|----------------------------------|---------------------|---------------------|----------------------------------|---------------------|---------------------|
|                |                                                   |                   |            |                        |                                                 | Relative methylation (Cy-5/Cy-3) | Cy-3 signal (Input) | Cy-5 signal (MeDIP) | Relative methylation (Cy-5/Cy-3) | Cy-3 signal (Input) | Cy-5 signal (MeDIP) |
| A_68_P31205113 | chr17:46247925-46247969                           | NM_026768:-6      | Mrps18a    | PROMOTER               | 0.375                                           | 0.423                            | 1745.63             | 739.22              | 0.159                            | 1403.26             | 222.69              |
| A_68_P31161697 | chr17:36053340-36053384                           | NM_025878:-48     | Mrps18b    | DIVERGENT_PROMOTER     | 0.641                                           | 0.574                            | 1546.78             | 887.48              | 0.368                            | 1262.04             | 464.16              |
| A_68_P23931503 | chr5:101227718-101227762                          | NM_026826:-37     | Mrps18c    | DIVERGENT_PROMOTER     | 0.191                                           | 0.626                            | 2457.91             | 1538.68             | 0.120                            | 1769.91             | 211.62              |
| A_68_P27998472 | chr11:88017697-88017741                           | NM_024174:-201    | Mrps23     | PROMOTER               | 0.164                                           | 0.710                            | 2072.68             | 1470.72             | 0.116                            | 1545.59             | 179.32              |
| A_68_P27998475 | chr11:88018009-88018053                           | NM_024174:111     | Mrps23     | INSIDE                 | 0.234                                           | 0.715                            | 2166.43             | 1548.72             | 0.167                            | 1692.33             | 282.84              |
| A_68_P24643637 | chr6:92133635-92133679                            | NM_025578:361     | Mrps25     | INSIDE                 | 0.258                                           | 0.471                            | 1218.06             | 574.11              | 0.121                            | 998.31              | 121.24              |
| A_68_P24643638 | chr6:92133742-92133786                            | NM_025578:253     | Mrps25     | INSIDE                 | 0.390                                           | 0.494                            | 1982.78             | 978.66              | 0.192                            | 1582.60             | 304.52              |
| A_68_P29368030 | chr13:119176079-119176123                         | NM_021556:-41     | Mrps30     | PROMOTER               | 0.241                                           | 0.488                            | 1388.29             | 677.38              | 0.118                            | 1022.53             | 120.20              |
| A_68_P24385094 | chr6:39760759-39760803                            | NM_001010930:155  | Mrps33     | INSIDE                 | 0.253                                           | 0.499                            | 1094.41             | 546.56              | 0.126                            | 946.97              | 119.67              |
| A_68_P24932172 | chr6:146991149-146991196                          | NM_145573:-119    | Mrps35     | PROMOTER               | 0.205                                           | 0.650                            | 968.71              | 629.59              | 0.133                            | 916.27              | 122.09              |
| A_68_P24932173 | chr6:146991217-146991261                          | NM_145573:-53     | Mrps35     | PROMOTER               | 0.593                                           | 0.358                            | 1804.95             | 645.93              | 0.212                            | 1586.10             | 336.34              |
| A_68_P29269917 | chr13:101514369-101514413                         | NM_001190264:224  | Mrps36     | INSIDE                 | 0.393                                           | 0.562                            | 1483.16             | 833.55              | 0.221                            | 1137.24             | 251.42              |
| A_68_P21614449 | chr2:127413281-127413325                          | NM_029963:141     | Mrps5      | INSIDE                 | 0.376                                           | 0.672                            | 1546.53             | 1039.02             | 0.253                            | 1288.59             | 325.64              |
| A_68_P21614450 | chr2:127413402-127413446                          | NM_029963:263     | Mrps5      | INSIDE                 | 0.481                                           | 0.702                            | 1575.99             | 1106.42             | 0.337                            | 1167.14             | 393.86              |
| A_68_P30966735 | chr16:92059004-92059048                           | NM_080456:446     | Mrps6      | INSIDE                 | 0.288                                           | 0.491                            | 1978.11             | 971.22              | 0.141                            | 1636.30             | 231.32              |
| A_68_P20185543 | chr1:42908342-42908386                            | NM_023514:287     | Mrps9      | INSIDE                 | 0.613                                           | 0.465                            | 1569.81             | 729.99              | 0.285                            | 1272.81             | 363.00              |
| A_68_P20185544 | chr1:42908420-42908464                            | NM_023514:365     | Mrps9      | INSIDE                 | 0.328                                           | 0.678                            | 1127.31             | 763.76              | 0.222                            | 885.66              | 196.52              |
| A_68_P21138065 | chr2:35991976-35992020                            | NM_026422:81      | Mrf        | INSIDE                 | 0.290                                           | 0.380                            | 1379.22             | 524.74              | 0.110                            | 1059.61             | 116.93              |
| A_68_P31424458 | chr17:88071727-88071771                           | NM_008628:-148    | Msh2       | PROMOTER               | 0.349                                           | 0.557                            | 1109.81             | 618.20              | 0.194                            | 936.25              | 181.98              |
| A_68_P29223483 | chr13:93125415-93125459                           | NM_010829:-478    | Msh3       | PROMOTER               | 0.414                                           | 0.660                            | 1694.35             | 1118.52             | 0.273                            | 1384.23             | 377.98              |
| A_68_P24009559 | chr5:115886650-115886694                          | NM_008629:6979    | Msi1       | INSIDE                 | 0.265                                           | 0.634                            | 963.95              | 611.18              | 0.168                            | 745.10              | 125.39              |
| A_68_P24009561 | chr5:115886828-115886872                          | NM_008629:7157    | Msi1       | INSIDE                 | 0.389                                           | 0.420                            | 1710.15             | 717.48              | 0.163                            | 1361.24             | 222.06              |
| A_68_P28058585 | chr11:98656131-98656175                           | NM_028722:-930    | Msl1       | PROMOTER               | 0.112                                           | 0.556                            | 2952.96             | 1640.98             | 0.062                            | 2016.57             | 125.79              |
| A_68_P28058586 | chr11:98656221-98656265                           | NM_028722:-840    | Msl1       | PROMOTER               | 0.152                                           | 0.653                            | 5236.24             | 3417.67             | 0.099                            | 3424.99             | 339.57              |
| A_68_P26772694 | chr9:100979083-100979130                          | NM_001100451:656  | Msl2       | INSIDE                 | 0.212                                           | 0.570                            | 1325.78             | 756.27              | 0.121                            | 1057.20             | 127.87              |
| A_68_P27154483 | chr10:55835222-55835266                           | NM_001163833:8522 | Msl3l2     | INSIDE                 | 0.443                                           | 0.444                            | 1207.43             | 535.66              | 0.197                            | 935.63              | 184.04              |
| A_68_P32543772 | chrX:93291348-93291392                            | NM_010833:-13     | Msn        | PROMOTER               | 0.305                                           | 2.325                            | 4448.28             | 10340.82            | 0.709                            | 1856.50             | 1315.46             |
| A_68_P29667754 | chr14:65059716-65059760                           | NM_026322:15002   | Msr        | INSIDE                 | 0.297                                           | 0.607                            | 853.63              | 518.11              | 0.181                            | 685.33              | 123.71              |
| A_68_P21044522 | chr2:19293408-19293452                            | NM_029619:168     | Msr        | INSIDE                 | 0.269                                           | 0.576                            | 2781.09             | 1603.02             | 0.155                            | 1989.46             | 308.99              |
| A_68_P23615663 | chr5:38208346-38208390                            | NM_010835:7456    | Msx1       | DOWNSTREAM             | 0.303                                           | 1.765                            | 3893.21             | 6873.03             | 0.535                            | 2698.87             | 1444.12             |
| A_68_P23615664 | chr5:38208449-38208493                            | NM_010835:7354    | Msx1       | DOWNSTREAM             | 0.651                                           | 2.478                            | 2092.20             | 5184.99             | 1.614                            | 1476.33             | 2383.32             |
| A_68_P23615749 | chr5:38218796-38218844                            | NM_010835:-2996   | Msx1       | PROMOTER               | 0.097                                           | 0.700                            | 2498.75             | 1748.87             | 0.068                            | 1757.86             | 119.86              |
| A_68_P29044037 | chr13:53557736-53557785                           | NM_013601:10389   | Msx2       | DOWNSTREAM             | 0.367                                           | 0.659                            | 1970.32             | 1299.01             | 0.242                            | 1359.38             | 328.66              |
| A_68_P25581948 | chr7:147233969-147234013                          | NM_010836:997     | Msx3       | INSIDE                 | 0.463                                           | 0.570                            | 1680.05             | 957.30              | 0.264                            | 1210.76             | 319.27              |
| A_68_P25581952 | chr7:147234431-147234477                          | NM_010836:533     | Msx3       | INSIDE                 | 0.165                                           | 0.681                            | 2794.24             | 1902.77             | 0.112                            | 1971.31             | 221.10              |
| A_68_P25581954 | chr7:147234659-147234703                          | NM_010836:307     | Msx3       | INSIDE                 | 0.578                                           | 0.504                            | 2172.19             | 1094.67             | 0.291                            | 1560.04             | 454.44              |
| A_68_P25582013 | chr7:147243953-147243997                          | NM_010836:-8987   | Msx3       | PROMOTER               | 0.126                                           | 0.660                            | 2504.54             | 1653.55             | 0.083                            | 1781.17             | 148.44              |
| A_68_P26075899 | chr8:96703109-96703153                            | NM_013602:142     | Mt1        | INSIDE                 | 0.442                                           | 0.498                            | 1026.81             | 511.41              | 0.220                            | 911.68              | 200.51              |
| A_68_P26075855 | chr8:96696139-96696185                            | NM_008630:-355    | Mt2        | PROMOTER               | 0.273                                           | 0.652                            | 1159.31             | 755.79              | 0.178                            | 994.54              | 177.13              |
| A_68_P26075858 | chr8:96696472-96696516                            | NM_008630:-23     | Mt2        | PROMOTER               | 0.249                                           | 0.518                            | 1334.06             | 691.64              | 0.129                            | 1082.89             | 139.77              |
| A_68_P26075859 | chr8:96696623-96696667                            | NM_008630:127     | Mt2        | INSIDE                 | 0.388                                           | 0.556                            | 1281.29             | 712.61              | 0.216                            | 1053.10             | 227.32              |
| A_68_P26075861 | chr8:96696797-96696851                            | NM_008630:307     | Mt2        | INSIDE                 | 0.317                                           | 0.474                            | 1129.70             | 535.59              | 0.150                            | 913.33              | 137.27              |
| A_68_P31400333 | chr17:84105260-84105304                           | NM_001171053:-220 | Mta3       | PROMOTER               | 0.579                                           | 0.580                            | 2863.75             | 1660.20             | 0.336                            | 2363.73             | 793.91              |
| A_68_P31400335 | chr17:84105596-84105640                           | NM_001171053:116  | Mta3       | INSIDE                 | 0.379                                           | 0.340                            | 1941.82             | 660.09              | 0.129                            | 1577.14             | 203.21              |



| ProbeName      | Target position of probe on CpG island microarray | TargetID           | GeneSymbol | CpG island Description | Ratio of relative methylation (TiO2-NP/Vehicle) | Sham group                       |                     |                     | TiO <sub>2</sub> -H group        |                     |                     |
|----------------|---------------------------------------------------|--------------------|------------|------------------------|-------------------------------------------------|----------------------------------|---------------------|---------------------|----------------------------------|---------------------|---------------------|
|                |                                                   |                    |            |                        |                                                 | Relative methylation (Cy-5/Cy-3) | Cy-3 signal (Input) | Cy-5 signal (MeDIP) | Relative methylation (Cy-5/Cy-3) | Cy-3 signal (Input) | Cy-5 signal (MeDIP) |
| A_68_P25092688 | chr7:52622594-52622638                            | NR_027802:14       | Mtag2      | INSIDE                 | 0.248                                           | 0.424                            | 2052.66             | 870.38              | 0.105                            | 1640.76             | 172.55              |
| A_68_P25092691 | chr7:52622936-52622980                            | NR_027802:356      | Mtag2      | INSIDE                 | 0.253                                           | 0.565                            | 1167.31             | 660.00              | 0.143                            | 844.92              | 120.84              |
| A_68_P25092692 | chr7:52623070-52623114                            | NR_027802:490      | Mtag2      | INSIDE                 | 0.234                                           | 0.589                            | 1156.52             | 681.03              | 0.138                            | 914.46              | 126.01              |
| A_68_P23094197 | chr4:88783582-88783626                            | NM_024433:331      | Mtap       | INSIDE                 | 0.312                                           | 0.678                            | 1560.00             | 1057.61             | 0.212                            | 1202.35             | 254.49              |
| A_68_P21579978 | chr2:121114942-121114992                          | NM_032393:-371     | Mtap1a     | PROMOTER               | 0.361                                           | 0.485                            | 1371.23             | 664.89              | 0.175                            | 1114.24             | 195.15              |
| A_68_P21579979 | chr2:121115051-121115098                          | NM_032393:-263     | Mtap1a     | PROMOTER               | 0.258                                           | 0.454                            | 1406.73             | 638.29              | 0.117                            | 1024.38             | 119.88              |
| A_68_P29263987 | chr13:100285787-100285831                         | NM_008634:749      | Mtap1b     | INSIDE                 | 0.413                                           | 0.593                            | 1126.62             | 667.52              | 0.245                            | 890.06              | 217.62              |
| A_68_P25954854 | chr8:73430001-73430045                            | NM_173013:150      | Mtap1s     | INSIDE                 | 0.173                                           | 0.716                            | 9666.59             | 6923.16             | 0.124                            | 6411.88             | 792.74              |
| A_68_P26821060 | chr9:109834141-109834185                          | NM_001205331:-115  | Mtap4      | PROMOTER               | 0.641                                           | 0.661                            | 1010.27             | 667.28              | 0.423                            | 961.08              | 406.93              |
| A_68_P26821062 | chr9:109834457-109834501                          | NM_001205331:201   | Mtap4      | INSIDE                 | 0.513                                           | 0.548                            | 2387.42             | 1308.77             | 0.281                            | 1888.78             | 530.86              |
| A_68_P26821065 | chr9:109834739-109834783                          | NM_001205331:483   | Mtap4      | INSIDE                 | 0.601                                           | 0.735                            | 2605.53             | 1914.22             | 0.441                            | 1897.80             | 837.46              |
| A_68_P26821068 | chr9:109835124-109835175                          | NM_001205331:872   | Mtap4      | INSIDE                 | 0.105                                           | 0.690                            | 2234.59             | 1541.09             | 0.072                            | 1615.81             | 116.74              |
| A_68_P25360738 | chr7:106415893-106415949                          | NM_001048167:-36   | Mtap6      | PROMOTER               | 0.212                                           | 0.709                            | 1944.04             | 1378.28             | 0.151                            | 1326.39             | 199.73              |
| A_68_P25360744 | chr7:106416416-106416460                          | NM_001043355:-417  | Mtap6      | PROMOTER               | 0.223                                           | 0.511                            | 2418.34             | 1236.69             | 0.114                            | 1740.19             | 198.36              |
| A_68_P26985108 | chr10:19868390-19868434                           | NM_001198635:-313  | Mtap7      | PROMOTER               | 0.630                                           | 0.627                            | 960.34              | 601.97              | 0.395                            | 830.65              | 328.19              |
| A_68_P23278939 | chr4:125911753-125911803                          | NM_001145970:21785 | Mtap7d1    | INSIDE                 | 0.451                                           | 3.465                            | 1273.29             | 4411.55             | 1.561                            | 1031.98             | 1610.84             |
| A_68_P23279071 | chr4:125932970-125933014                          | NM_001145970:571   | Mtap7d1    | INSIDE                 | 0.531                                           | 0.416                            | 3133.26             | 1304.23             | 0.221                            | 2249.58             | 497.33              |
| A_68_P32774622 | chrX:155853067-155853111                          | NM_001081124:579   | Mtap7d2    | INSIDE                 | 0.255                                           | 1.575                            | 2887.48             | 4549.12             | 0.401                            | 1260.64             | 505.77              |
| A_68_P32774623 | chrX:155853132-155853176                          | NM_001081124:645   | Mtap7d2    | INSIDE                 | 0.220                                           | 1.352                            | 4018.89             | 5431.73             | 0.298                            | 1763.61             | 525.16              |
| A_68_P22278905 | chr3:82162143-82162187                            | NM_001081230:171   | Mtap9      | INSIDE                 | 0.392                                           | 0.487                            | 1290.87             | 628.19              | 0.191                            | 1051.49             | 200.76              |
| A_68_P22278908 | chr3:82162460-82162514                            | NM_001081230:493   | Mtap9      | INSIDE                 | 0.266                                           | 0.442                            | 1225.07             | 541.92              | 0.118                            | 993.17              | 117.05              |
| A_68_P30232954 | chr15:55388910-55388954                           | NM_001168250:-30   | Mtbp       | DIVERGENT_PROMOTER     | 0.397                                           | 0.432                            | 3116.90             | 1347.01             | 0.172                            | 2372.98             | 407.34              |
| A_68_P21419237 | chr2:90687518-90687562                            | NM_019758:229      | Mtch2      | INSIDE                 | 0.239                                           | 0.403                            | 1534.02             | 617.76              | 0.096                            | 1247.03             | 120.04              |
| A_68_P21419238 | chr2:90687606-90687650                            | NM_019758:317      | Mtch2      | INSIDE                 | 0.578                                           | 0.484                            | 1622.41             | 785.73              | 0.280                            | 1170.82             | 327.70              |
| A_68_P32471624 | chrX:72661844-72661888                            | NM_010839:16       | Mtcp1      | INSIDE                 | 0.246                                           | 1.875                            | 2811.14             | 5270.45             | 0.461                            | 1255.02             | 578.78              |
| A_68_P30126794 | chr15:34012255-34012299                           | NM_026002:-197     | Mtdh       | PROMOTER               | 0.281                                           | 0.703                            | 2580.46             | 1815.24             | 0.197                            | 1925.28             | 380.12              |
| A_68_P30126800 | chr15:34012857-34012901                           | NM_026002:405      | Mtdh       | INSIDE                 | 0.233                                           | 0.566                            | 1116.12             | 632.15              | 0.132                            | 971.16              | 128.37              |
| A_68_P20454694 | chr1:95202421-95202465                            | NM_178051:5        | Mterfd2    | INSIDE                 | 0.662                                           | 0.577                            | 1626.22             | 938.73              | 0.382                            | 1052.21             | 401.83              |
| A_68_P23970077 | chr5:108494745-108494789                          | NM_013827:6        | Mtf2       | INSIDE                 | 0.503                                           | 0.472                            | 1575.18             | 743.09              | 0.237                            | 1182.80             | 280.55              |
| A_68_P27555607 | chr11:3996584-3996628                             | NM_026443:-1172    | Mtfp1      | PROMOTER               | 0.371                                           | 0.540                            | 1683.71             | 909.01              | 0.200                            | 1243.79             | 248.91              |
| A_68_P27555611 | chr11:3996953-3997010                             | NM_026443:-1547    | Mtfp1      | PROMOTER               | 0.233                                           | 0.678                            | 934.18              | 633.01              | 0.158                            | 748.48              | 118.13              |
| A_68_P28552887 | chr12:77356011-77356057                           | NM_138745:-184     | Mthfd1     | DIVERGENT_PROMOTER     | 0.309                                           | 0.550                            | 1015.45             | 558.66              | 0.170                            | 708.43              | 120.50              |
| A_68_P23392000 | chr4:147413032-147413076                          | NM_010840:-131     | Mthfr      | DIVERGENT_PROMOTER     | 0.233                                           | 0.683                            | 2292.33             | 1565.34             | 0.159                            | 1870.54             | 297.44              |
| A_68_P26224549 | chr8:123632350-123632394                          | NM_001166482:-93   | Mthfsd     | DIVERGENT_PROMOTER     | 0.452                                           | 0.640                            | 1591.65             | 1018.46             | 0.289                            | 1282.58             | 371.18              |
| A_68_P27674921 | chr11:29426434-29426478                           | NM_133767:0        | Mtif2      | INSIDE                 | 0.592                                           | 0.496                            | 1979.73             | 981.54              | 0.293                            | 1667.20             | 489.31              |
| A_68_P30020398 | chr15:12135347-12135391                           | NM_172958:520      | Mtmr12     | INSIDE                 | 0.254                                           | 0.433                            | 1225.75             | 530.80              | 0.110                            | 1062.33             | 116.77              |
| A_68_P24758234 | chr6:113187868-113187912                          | NM_026849:54       | Mtmr14     | INSIDE                 | 0.082                                           | 0.677                            | 2866.59             | 1939.61             | 0.055                            | 2176.18             | 120.56              |
| A_68_P27558533 | chr11:4494164-4494208                             | NM_028860:632      | Mtmr3      | INSIDE                 | 0.238                                           | 0.635                            | 1033.93             | 656.51              | 0.151                            | 815.70              | 123.39              |
| A_68_P27994973 | chr11:87405603-87405647                           | NM_133215:-94      | Mtmr4      | PROMOTER               | 0.496                                           | 1.489                            | 5235.41             | 7798.09             | 0.739                            | 3633.11             | 2683.93             |
| A_68_P29643653 | chr14:60884373-60884418                           | NM_144843:331      | Mtmr6      | INSIDE                 | 0.154                                           | 0.610                            | 1562.70             | 953.37              | 0.094                            | 1241.19             | 116.93              |
| A_68_P25806929 | chr8:41719873-41719917                            | NM_001040699:252   | Mtmr7      | INSIDE                 | 0.248                                           | 0.666                            | 1759.44             | 1172.43             | 0.166                            | 1171.81             | 193.98              |
| A_68_P23394433 | chr4:147822470-147822515                          | NM_020009:-198     | Mtor       | DIVERGENT_PROMOTER     | 0.214                                           | 0.631                            | 1215.94             | 767.22              | 0.135                            | 861.85              | 116.54              |
| A_68_P24362050 | chr6:35489064-35489123                            | NM_008098:795      | Mtpn       | INSIDE                 | 0.346                                           | 0.658                            | 817.74              | 538.03              | 0.228                            | 744.07              | 169.54              |
| A_68_P24362054 | chr6:35489548-35489592                            | NM_008098:318      | Mtpn       | INSIDE                 | 0.117                                           | 0.500                            | 2604.67             | 1301.98             | 0.058                            | 2118.06             | 123.82              |

| ProbeName      | Target position of probe on CpG island microarray | TargetID          | GeneSymbol | CpG island Description | Ratio of relative methylation (TiO2-NP/Vehicle) | Sham group                       |                     |                     | TiO <sub>2</sub> -H group        |                     |                     |
|----------------|---------------------------------------------------|-------------------|------------|------------------------|-------------------------------------------------|----------------------------------|---------------------|---------------------|----------------------------------|---------------------|---------------------|
|                |                                                   |                   |            |                        |                                                 | Relative methylation (Cy-5/Cy-3) | Cy-3 signal (Input) | Cy-5 signal (MeDIP) | Relative methylation (Cy-5/Cy-3) | Cy-3 signal (Input) | Cy-5 signal (MeDIP) |
| A_68_P24362056 | chr6:35489772-35489816                            | NM_008098:94      | Mtpn       | INSIDE                 | 0.180                                           | 0.428                            | 1963.24             | 840.72              | 0.077                            | 1668.73             | 128.37              |
| A_68_P28831282 | chr13:12350227-12350271                           | NM_001081128:19   | Mtr        | INSIDE                 | 0.296                                           | 0.473                            | 2220.29             | 1050.04             | 0.140                            | 1540.42             | 215.54              |
| A_68_P28831283 | chr13:12350347-12350391                           | NM_001081128:-101 | Mtr        | PROMOTER               | 0.293                                           | 0.527                            | 1009.78             | 532.47              | 0.155                            | 763.32              | 117.96              |
| A_68_P29110672 | chr13:68720676-68720720                           | NM_172480:300     | Mtrr       | INSIDE                 | 0.665                                           | 0.641                            | 1667.98             | 1068.62             | 0.426                            | 1104.70             | 470.95              |
| A_68_P29110673 | chr13:68720745-68720789                           | NM_172480:232     | Mtrr       | INSIDE                 | 0.407                                           | 0.371                            | 1931.95             | 716.22              | 0.151                            | 1508.16             | 227.48              |
| A_68_P29110674 | chr13:68720849-68720893                           | NM_172480:128     | Mtrr       | INSIDE                 | 0.346                                           | 0.543                            | 6993.05             | 3796.75             | 0.188                            | 5272.54             | 989.59              |
| A_68_P29110675 | chr13:68720936-68720980                           | NM_172480:40      | Mtrr       | INSIDE                 | 0.340                                           | 0.574                            | 1799.72             | 1033.33             | 0.195                            | 1338.83             | 261.01              |
| A_68_P22567224 | chr3:137806385-137806429                          | NM_001163457:-54  | Mtp        | DIVERGENT_PROMOTER     | 0.167                                           | 0.709                            | 1704.46             | 1209.28             | 0.118                            | 1202.05             | 142.29              |
| A_68_P24176700 | chr5:148769468-148769512                          | NM_029920:595     | Mtus2      | INSIDE                 | 0.407                                           | 0.526                            | 1630.86             | 857.36              | 0.214                            | 1291.13             | 276.17              |
| A_68_P22317890 | chr3:89017814-89017858                            | NM_001161824:421  | Mtx1       | INSIDE                 | 0.203                                           | 0.737                            | 4415.74             | 3253.73             | 0.150                            | 2917.74             | 437.03              |
| A_68_P22317892 | chr3:89018127-89018171                            | NM_001161824:109  | Mtx1       | INSIDE                 | 0.453                                           | 0.623                            | 1854.34             | 1155.55             | 0.282                            | 1487.06             | 419.54              |
| A_68_P21339749 | chr2:74664060-74664104                            | NM_016804:214     | Mtx2       | INSIDE                 | 0.444                                           | 0.467                            | 1450.60             | 677.58              | 0.208                            | 1291.15             | 268.03              |
| A_68_P29591677 | chr14:49685584-49685628                           | NM_144535:-563    | Mudeng     | PROMOTER               | 0.601                                           | 0.570                            | 2138.88             | 1220.06             | 0.343                            | 1757.77             | 602.70              |
| A_68_P28961838 | chr13:38726587-38726631                           | NM_139063:370     | Muted      | INSIDE                 | 0.146                                           | 0.650                            | 1652.99             | 1074.70             | 0.095                            | 1293.75             | 122.85              |
| A_68_P28961839 | chr13:38726652-38726696                           | NM_139063:304     | Muted      | INSIDE                 | 0.402                                           | 0.532                            | 1082.81             | 575.86              | 0.214                            | 844.67              | 180.51              |
| A_68_P26233415 | chr8:124967303-124967347                          | NM_138656:-2      | Mvd        | PROMOTER               | 0.387                                           | 0.650                            | 1192.88             | 775.28              | 0.251                            | 953.11              | 239.48              |
| A_68_P32181719 | chr19:53384898-53384942                           | NM_001008542:-75  | Mxil       | PROMOTER               | 0.317                                           | 0.645                            | 2113.80             | 1363.71             | 0.205                            | 1652.54             | 338.46              |
| A_68_P32181743 | chr19:53388066-53388111                           | NM_001008542:3093 | Mxil       | INSIDE                 | 0.308                                           | 0.429                            | 1821.72             | 781.42              | 0.132                            | 1669.23             | 220.66              |
| A_68_P32181752 | chr19:53389016-53389065                           | NM_001008542:4045 | Mxil       | INSIDE                 | 0.182                                           | 0.603                            | 1309.82             | 789.28              | 0.109                            | 1068.00             | 116.93              |
| A_68_P23440918 | chr4:155215643-155215688                          | NM_024263:1877    | Mxra8      | INSIDE                 | 0.422                                           | 1.415                            | 1342.30             | 1899.36             | 0.597                            | 870.00              | 519.73              |
| A_68_P26991374 | chr10:20878723-20878777                           | NM_001198914:2040 | Myb        | INSIDE                 | 0.216                                           | 0.623                            | 1126.09             | 702.08              | 0.134                            | 896.91              | 120.53              |
| A_68_P20023668 | chr1:9690963-9691016                              | NM_008651:-699    | Mybl1      | PROMOTER               | 0.316                                           | 0.610                            | 918.92              | 560.66              | 0.193                            | 638.57              | 123.00              |
| A_68_P30267534 | chr15:61819131-61819181                           | NM_001177352:2261 | Myc        | INSIDE                 | 0.107                                           | 0.618                            | 2362.38             | 1461.03             | 0.066                            | 1787.71             | 117.95              |
| A_68_P23265180 | chr4:123581921-123581965                          | NM_019660:-313    | Mycbp      | PROMOTER               | 0.292                                           | 0.604                            | 2027.64             | 1224.95             | 0.177                            | 1616.30             | 285.42              |
| A_68_P23265181 | chr4:123582007-123582051                          | NM_019660:-227    | Mycbp      | PROMOTER               | 0.201                                           | 0.384                            | 1828.94             | 702.29              | 0.077                            | 1497.45             | 115.71              |
| A_68_P28033523 | chr11:94382882-94382926                           | NM_170671:-88     | Mycbpap    | PROMOTER               | 0.446                                           | 0.536                            | 1774.96             | 951.92              | 0.239                            | 1290.63             | 308.88              |
| A_68_P28246294 | chr12:12947123-12947167                           | NM_008709:1498    | Myen       | INSIDE                 | 0.203                                           | 0.485                            | 3235.04             | 1570.37             | 0.099                            | 2055.94             | 203.09              |
| A_68_P28246315 | chr12:12949549-12949593                           | NM_008709:-928    | Myen       | PROMOTER               | 0.200                                           | 0.464                            | 1639.65             | 760.27              | 0.093                            | 1287.97             | 119.40              |
| A_68_P26871809 | chr9:119248880-119248924                          | NM_010851:256     | Myd88      | INSIDE                 | 0.194                                           | 0.609                            | 2528.26             | 1540.03             | 0.118                            | 1924.18             | 227.84              |
| A_68_P26871811 | chr9:119249105-119249149                          | NM_010851:32      | Myd88      | INSIDE                 | 0.575                                           | 0.397                            | 1622.18             | 643.73              | 0.228                            | 1414.08             | 322.78              |
| A_68_P21600380 | chr2:124949503-124949547                          | NM_001162417:-128 | Myef2      | PROMOTER               | 0.494                                           | 0.465                            | 1835.58             | 853.12              | 0.229                            | 1450.53             | 332.74              |
| A_68_P20450137 | chr1:94538493-94538537                            | NR_028108:11      | Myeov2     | INSIDE                 | 0.428                                           | 0.339                            | 3227.05             | 1092.73             | 0.145                            | 2584.01             | 374.18              |
| A_68_P30497294 | chr15:102162316-102162360                         | NM_021713:199     | Myg1       | INSIDE                 | 0.117                                           | 0.483                            | 3419.15             | 1651.18             | 0.057                            | 2543.67             | 144.28              |
| A_68_P30497296 | chr15:102162515-102162559                         | NM_021713:397     | Myg1       | INSIDE                 | 0.110                                           | 0.703                            | 2397.05             | 1684.13             | 0.078                            | 1472.60             | 114.29              |
| A_68_P27890684 | chr11:68505119-68505163                           | NM_175260:-276    | Myh10      | PROMOTER               | 0.403                                           | 0.664                            | 1027.75             | 682.38              | 0.268                            | 863.61              | 231.22              |
| A_68_P30356226 | chr15:77672472-77672516                           | NM_022410:51      | Myh9       | INSIDE                 | 0.213                                           | 0.556                            | 1149.55             | 638.58              | 0.118                            | 1012.00             | 119.81              |
| A_68_P31331867 | chr17:71340037-71340081                           | NM_023402:-202    | Myl12b     | PROMOTER               | 0.295                                           | 0.729                            | 5895.03             | 4299.37             | 0.215                            | 4404.46             | 949.13              |
| A_68_P29001574 | chr13:45485076-45485120                           | NM_153789:-12     | Mylip      | PROMOTER               | 0.530                                           | 0.531                            | 1866.41             | 991.57              | 0.281                            | 1653.44             | 465.34              |
| A_68_P22029224 | chr3:30501291-30501335                            | NM_030557:304     | Mynn       | INSIDE                 | 0.394                                           | 0.491                            | 1203.66             | 591.48              | 0.194                            | 948.31              | 183.80              |
| A_68_P22029225 | chr3:30501383-30501427                            | NM_030557:396     | Mynn       | INSIDE                 | 0.414                                           | 0.425                            | 1483.23             | 631.03              | 0.176                            | 1178.90             | 207.57              |
| A_68_P30082171 | chr15:25552353-25552397                           | NM_019472:70      | Myo10      | INSIDE                 | 0.274                                           | 0.499                            | 2761.04             | 1376.67             | 0.137                            | 1900.34             | 259.65              |
| A_68_P20224246 | chr1:51972071-51972115                            | NM_001161817:726  | Myo1b      | INSIDE                 | 0.259                                           | 0.508                            | 1107.72             | 562.21              | 0.132                            | 985.99              | 129.71              |
| A_68_P20224249 | chr1:51972342-51972397                            | NM_001161817:449  | Myo1b      | INSIDE                 | 0.319                                           | 0.593                            | 953.15              | 565.63              | 0.189                            | 766.66              | 145.17              |
| A_68_P20224252 | chr1:51972666-51972710                            | NM_001161817:130  | Myo1b      | INSIDE                 | 0.216                                           | 0.425                            | 3979.41             | 1689.63             | 0.092                            | 3162.87             | 289.48              |

| ProbeName      | Target position of probe on CpG island microarray | TargetID           | GeneSymbol | CpG island Description | Ratio of relative methylation (TiO2-NP/Vehicle) | Sham group                       |                     |                     | TiO <sub>2</sub> -H group        |                     |                     |
|----------------|---------------------------------------------------|--------------------|------------|------------------------|-------------------------------------------------|----------------------------------|---------------------|---------------------|----------------------------------|---------------------|---------------------|
|                |                                                   |                    |            |                        |                                                 | Relative methylation (Cy-5/Cy-3) | Cy-3 signal (Input) | Cy-5 signal (MeDIP) | Relative methylation (Cy-5/Cy-3) | Cy-3 signal (Input) | Cy-5 signal (MeDIP) |
| A_68_P27956333 | chr11:80593206-80593250                           | NM_177390:299      | Myo1d      | INSIDE                 | 0.460                                           | 0.582                            | 1144.28             | 666.42              | 0.268                            | 911.42              | 244.25              |
| A_68_P26641837 | chr9:74919720-74919769                            | NM_010864:732      | Myo5a      | INSIDE                 | 0.250                                           | 0.452                            | 1553.93             | 701.83              | 0.113                            | 1136.12             | 128.18              |
| A_68_P26642806 | chr9:75079725-75079769                            | NM_001081322:-74   | Myo5c      | PROMOTER               | 0.103                                           | 0.649                            | 2333.40             | 1513.45             | 0.067                            | 1800.68             | 120.28              |
| A_68_P26668158 | chr9:80012869-80012913                            | NM_001039546:50    | Myo6       | INSIDE                 | 0.237                                           | 0.485                            | 1414.70             | 685.63              | 0.115                            | 1096.58             | 125.96              |
| A_68_P25353895 | chr7:105259944-105259988                          | NM_008663:8037     | Myo7a      | INSIDE                 | 0.530                                           | 0.700                            | 1793.40             | 1255.01             | 0.371                            | 1483.63             | 550.32              |
| A_68_P26555224 | chr9:59598868-59598912                            | NM_173018:-90      | Myo9a      | DIVERGENT_PROMOTER     | 0.074                                           | 0.531                            | 4461.33             | 2370.67             | 0.039                            | 3225.68             | 126.42              |
| A_68_P26555228 | chr9:59599330-59599374                            | NM_173018:372      | Myo9a      | INSIDE                 | 0.401                                           | 0.623                            | 1581.72             | 985.65              | 0.250                            | 1278.00             | 319.75              |
| A_68_P25955963 | chr8:73796755-73796799                            | NM_001142322:164   | Myo9b      | INSIDE                 | 0.315                                           | 0.581                            | 1757.69             | 1021.08             | 0.183                            | 1279.05             | 235.95              |
| A_68_P25955964 | chr8:73796836-73796880                            | NM_001142322:246   | Myo9b      | INSIDE                 | 0.427                                           | 0.699                            | 2481.41             | 1734.07             | 0.299                            | 1887.62             | 563.56              |
| A_68_P25955965 | chr8:73796966-73797010                            | NM_001142322:376   | Myo9b      | INSIDE                 | 0.151                                           | 0.700                            | 2562.07             | 1792.89             | 0.106                            | 1903.58             | 201.38              |
| A_68_P25098703 | chr7:53632108-53632154                            | NM_010866:287      | Myo1d      | INSIDE                 | 0.309                                           | 0.465                            | 1338.94             | 623.18              | 0.144                            | 922.48              | 132.79              |
| A_68_P25098706 | chr7:53632477-53632521                            | NM_010866:655      | Myo1d      | INSIDE                 | 0.436                                           | 0.656                            | 3452.43             | 2263.98             | 0.286                            | 2667.74             | 762.17              |
| A_68_P29448044 | chr14:21459988-21460032                           | NM_021508:15752    | Myoz1      | DOWNSTREAM             | 0.307                                           | 0.627                            | 2642.88             | 1657.82             | 0.193                            | 2136.78             | 411.42              |
| A_68_P29448045 | chr14:21460170-21460214                           | NM_021508:15570    | Myoz1      | DOWNSTREAM             | 0.210                                           | 0.570                            | 1308.25             | 746.19              | 0.120                            | 1075.45             | 129.03              |
| A_68_P29448046 | chr14:21460257-21460301                           | NM_021508:15484    | Myoz1      | DOWNSTREAM             | 0.190                                           | 0.607                            | 1437.59             | 872.07              | 0.115                            | 1176.43             | 135.38              |
| A_68_P29448048 | chr14:21460427-21460474                           | NM_021508:15312    | Myoz1      | DOWNSTREAM             | 0.369                                           | 0.591                            | 1254.51             | 740.98              | 0.218                            | 1043.25             | 227.15              |
| A_68_P24990787 | chr7:19577120-19577164                            | NM_145579:549      | Mypop      | INSIDE                 | 0.133                                           | 0.688                            | 2030.37             | 1397.06             | 0.092                            | 1293.77             | 118.59              |
| A_68_P24990788 | chr7:19577261-19577305                            | NM_145579:689      | Mypop      | INSIDE                 | 0.313                                           | 0.560                            | 1902.02             | 1065.02             | 0.175                            | 1477.16             | 258.81              |
| A_68_P23120295 | chr4:94645754-94645798                            | NM_177239:15       | Mysm1      | INSIDE                 | 0.552                                           | 0.623                            | 1198.81             | 746.32              | 0.344                            | 1053.70             | 362.31              |
| A_68_P23120296 | chr4:94645934-94645983                            | NM_177239:-167     | Mysm1      | PROMOTER               | 0.296                                           | 0.501                            | 1093.13             | 547.24              | 0.148                            | 809.97              | 119.88              |
| A_68_P28037993 | chr11:95170830-95170877                           | NM_001195003:707   | Myst2      | INSIDE                 | 0.245                                           | 0.679                            | 1249.80             | 848.64              | 0.166                            | 987.41              | 163.98              |
| A_68_P28037994 | chr11:95170942-95170986                           | NM_001195003:596   | Myst2      | INSIDE                 | 0.091                                           | 0.712                            | 2425.63             | 1726.09             | 0.065                            | 1875.50             | 121.79              |
| A_68_P28037998 | chr11:95171463-95171507                           | NM_001195003:76    | Myst2      | INSIDE                 | 0.518                                           | 0.604                            | 1913.35             | 1155.83             | 0.313                            | 1555.98             | 487.26              |
| A_68_P29453022 | chr14:22318726-22318770                           | NM_001205241:-243  | Myst4      | PROMOTER               | 0.476                                           | 0.652                            | 2715.22             | 1769.97             | 0.310                            | 2259.17             | 700.97              |
| A_68_P29453025 | chr14:22319120-22319164                           | NM_017479:136      | Myst4      | INSIDE                 | 0.354                                           | 0.658                            | 2124.63             | 1398.55             | 0.233                            | 1702.60             | 396.53              |
| A_68_P29453027 | chr14:22319300-22319344                           | NM_017479:316      | Myst4      | INSIDE                 | 0.613                                           | 0.706                            | 2117.96             | 1496.31             | 0.433                            | 1647.68             | 713.30              |
| A_68_P29453032 | chr14:22319904-22319948                           | NM_017479:920      | Myst4      | INSIDE                 | 0.260                                           | 0.602                            | 1831.59             | 1101.96             | 0.156                            | 1439.74             | 225.28              |
| A_68_P24974337 | chr7:13629455-13629499                            | NM_145819:10637    | Mzf1       | INSIDE                 | 0.556                                           | 0.460                            | 1369.40             | 629.44              | 0.255                            | 1254.65             | 320.46              |
| A_68_P30567336 | chr16:15863446-15863492                           | NM_029354:-53      | Mzt2       | PROMOTER               | 0.222                                           | 0.549                            | 1337.26             | 734.18              | 0.122                            | 990.04              | 120.68              |
| A_68_P30567338 | chr16:15863650-15863696                           | NM_029354:-257     | Mzt2       | PROMOTER               | 0.248                                           | 0.550                            | 1210.20             | 665.90              | 0.137                            | 876.81              | 119.89              |
| A_68_P24191781 | chr5:151396250-151396294                          | NM_133898:828      | N4bp211    | INSIDE                 | 0.242                                           | 0.498                            | 1290.90             | 642.22              | 0.120                            | 982.44              | 118.33              |
| A_68_P24191782 | chr5:151396383-151396427                          | NM_133898:696      | N4bp211    | INSIDE                 | 0.597                                           | 0.551                            | 1231.69             | 678.95              | 0.329                            | 1028.45             | 338.20              |
| A_68_P32465509 | chrX:71167300-71167346                            | NM_001177965:-39   | Naa10      | PROMOTER               | 0.156                                           | 1.382                            | 1542.19             | 2131.35             | 0.215                            | 558.92              | 120.40              |
| A_68_P22129524 | chr3:51220706-51220750                            | NM_053089:791      | Naa15      | INSIDE                 | 0.179                                           | 0.681                            | 1206.14             | 821.71              | 0.122                            | 1011.94             | 123.47              |
| A_68_P24044318 | chr5:121847841-121847885                          | NM_172722:-128     | Naa25      | PROMOTER               | 0.348                                           | 0.665                            | 1669.70             | 1109.92             | 0.232                            | 1353.75             | 313.59              |
| A_68_P30719817 | chr16:44140456-44140500                           | NM_028108:557      | Naa50      | INSIDE                 | 0.299                                           | 0.464                            | 1161.17             | 538.28              | 0.139                            | 895.49              | 124.12              |
| A_68_P20227604 | chr1:52556860-52556904                            | NM_008667:410      | Nab1       | INSIDE                 | 0.186                                           | 0.483                            | 2120.26             | 1025.04             | 0.090                            | 1499.80             | 135.05              |
| A_68_P27539152 | chr10:127472516-127472560                         | NM_001113199:137   | Naca       | INSIDE                 | 0.661                                           | 0.541                            | 1584.53             | 857.07              | 0.357                            | 1252.56             | 447.78              |
| A_68_P27539157 | chr10:127473205-127473249                         | NM_001113199:825   | Naca       | INSIDE                 | 0.254                                           | 0.470                            | 1170.38             | 549.74              | 0.119                            | 1011.14             | 120.70              |
| A_68_P27539158 | chr10:127473288-127473332                         | NM_001113199:909   | Naca       | INSIDE                 | 0.260                                           | 0.610                            | 881.38              | 537.32              | 0.159                            | 729.80              | 115.75              |
| A_68_P21076058 | chr2:25915846-25915890                            | NM_001037098:32048 | Nacc2      | INSIDE                 | 0.585                                           | 3.005                            | 760.70              | 2285.96             | 1.759                            | 618.06              | 1087.18             |
| A_68_P21076059 | chr2:25915973-25916017                            | NM_001037098:31922 | Nacc2      | INSIDE                 | 0.546                                           | 3.135                            | 557.06              | 1746.57             | 1.712                            | 472.85              | 809.35              |
| A_68_P30382864 | chr15:82169262-82169306                           | NM_008669:-28      | Naga       | DIVERGENT_PROMOTER     | 0.154                                           | 0.637                            | 1530.88             | 975.38              | 0.098                            | 1260.29             | 123.30              |
| A_68_P24595550 | chr6:83745123-83745167                            | NM_001164187:-7    | Nagk       | PROMOTER               | 0.576                                           | 0.700                            | 1824.13             | 1277.32             | 0.404                            | 1476.84             | 595.96              |

| ProbeName      | Target position of probe on CpG island microarray | TargetID          | GeneSymbol | CpG island Description | Ratio of relative methylation (TiO2-NP/Vehicle) | Sham group                       |                     |                     | TiO <sub>2</sub> -H group        |                     |                     |
|----------------|---------------------------------------------------|-------------------|------------|------------------------|-------------------------------------------------|----------------------------------|---------------------|---------------------|----------------------------------|---------------------|---------------------|
|                |                                                   |                   |            |                        |                                                 | Relative methylation (Cy-5/Cy-3) | Cy-3 signal (Input) | Cy-5 signal (MeDIP) | Relative methylation (Cy-5/Cy-3) | Cy-3 signal (Input) | Cy-5 signal (MeDIP) |
| A_68_P24595553 | chr6:83745392-83745436                            | NM_001164187:263  | Nagk       | INSIDE                 | 0.186                                           | 0.681                            | 1256.74             | 855.76              | 0.127                            | 922.81              | 116.90              |
| A_68_P28071732 | chr11:100931187-100931231                         | NM_013792:-199    | Naglu      | PROMOTER               | 0.541                                           | 0.389                            | 1752.33             | 682.15              | 0.211                            | 1435.44             | 302.28              |
| A_68_P28071735 | chr11:100931508-100931552                         | NM_013792:123     | Naglu      | INSIDE                 | 0.589                                           | 0.655                            | 3157.25             | 2067.87             | 0.386                            | 2575.22             | 993.59              |
| A_68_P28077768 | chr11:102007243-102007287                         | NM_178053:-415    | Nags       | PROMOTER               | 0.315                                           | 0.517                            | 1829.39             | 945.43              | 0.163                            | 1325.77             | 215.72              |
| A_68_P28338223 | chr12:33504900-33504944                           | NM_021524:-277    | Nampt      | PROMOTER               | 0.235                                           | 0.713                            | 1627.55             | 1160.45             | 0.168                            | 1281.67             | 214.98              |
| A_68_P32226999 | chr19:60832637-60832681                           | NM_178421:769     | Nanos1     | INSIDE                 | 0.620                                           | 0.686                            | 1576.41             | 1081.76             | 0.425                            | 1332.58             | 566.66              |
| A_68_P32227001 | chr19:60832863-60832907                           | NM_178421:995     | Nanos1     | INSIDE                 | 0.142                                           | 0.467                            | 2123.47             | 992.04              | 0.066                            | 1757.05             | 116.56              |
| A_68_P24979588 | chr7:16683856-16683900                            | NM_025898:-113    | Napa       | PROMOTER               | 0.483                                           | 0.549                            | 1638.19             | 898.82              | 0.265                            | 1405.09             | 372.68              |
| A_68_P24979593 | chr7:16684397-16684441                            | NM_025898:427     | Napa       | INSIDE                 | 0.616                                           | 0.536                            | 1795.96             | 962.56              | 0.330                            | 1447.41             | 477.97              |
| A_68_P21731904 | chr2:148557983-148558027                          | NM_019632:152     | Napb       | INSIDE                 | 0.421                                           | 0.604                            | 3761.23             | 2270.02             | 0.254                            | 2478.43             | 630.22              |
| A_68_P23527432 | chr5:21207260-21207304                            | NM_178728:-119    | Napepld    | PROMOTER               | 0.628                                           | 0.666                            | 3288.87             | 2189.42             | 0.418                            | 2663.73             | 1112.75             |
| A_68_P30344675 | chr15:75714543-75714587                           | NM_172607:10347   | Naprt1     | DOWNSTREAM             | 0.206                                           | 0.704                            | 1351.77             | 951.47              | 0.145                            | 1014.95             | 146.84              |
| A_68_P30344676 | chr15:75714693-75714737                           | NM_172607:10197   | Naprt1     | DOWNSTREAM             | 0.613                                           | 0.702                            | 1537.91             | 1080.22             | 0.431                            | 1142.02             | 491.74              |
| A_68_P30344754 | chr15:75724482-75724526                           | NM_172607:407     | Naprt1     | INSIDE                 | 0.278                                           | 0.655                            | 1813.88             | 1187.79             | 0.182                            | 1479.30             | 269.17              |
| A_68_P30344755 | chr15:75724584-75724628                           | NM_172607:305     | Naprt1     | INSIDE                 | 0.379                                           | 0.701                            | 5491.86             | 3848.68             | 0.265                            | 3965.40             | 1052.51             |
| A_68_P30344756 | chr15:75724658-75724702                           | NM_172607:231     | Naprt1     | INSIDE                 | 0.240                                           | 0.606                            | 3756.08             | 2274.42             | 0.145                            | 2887.78             | 419.72              |
| A_68_P26610633 | chr9:69245586-69245639                            | NM_145618:-192    | Narg2      | PROMOTER               | 0.181                                           | 0.673                            | 1114.09             | 750.22              | 0.122                            | 952.46              | 115.92              |
| A_68_P26610636 | chr9:69245924-69245968                            | NM_145618:142     | Narg2      | INSIDE                 | 0.407                                           | 0.384                            | 5793.84             | 2227.06             | 0.156                            | 4240.45             | 663.08              |
| A_68_P31775847 | chr18:64676070-64676114                           | NM_001142950:119  | Nars       | INSIDE                 | 0.409                                           | 0.572                            | 2345.12             | 1342.55             | 0.234                            | 1852.25             | 434.23              |
| A_68_P31775848 | chr18:64676151-64676195                           | NM_001142950:39   | Nars       | INSIDE                 | 0.255                                           | 0.503                            | 1203.13             | 605.41              | 0.129                            | 921.01              | 118.39              |
| A_68_P21485377 | chr2:103601079-103601123                          | NM_153126:307     | Nat10      | INSIDE                 | 0.477                                           | 0.590                            | 1023.16             | 603.68              | 0.281                            | 767.63              | 216.03              |
| A_68_P21485378 | chr2:103601161-103601205                          | NM_153126:225     | Nat10      | INSIDE                 | 0.398                                           | 0.618                            | 3637.53             | 2248.47             | 0.246                            | 2544.68             | 625.73              |
| A_68_P21485380 | chr2:103601403-103601448                          | NM_153126:-18     | Nat10      | PROMOTER               | 0.292                                           | 0.351                            | 1473.67             | 517.41              | 0.102                            | 1179.32             | 120.82              |
| A_68_P30506990 | chr16:3884336-3884380                             | NM_029090:-260    | Nat15      | PROMOTER               | 0.511                                           | 0.549                            | 2044.21             | 1122.05             | 0.281                            | 1551.00             | 435.45              |
| A_68_P23592016 | chr5:34338666-34338710                            | NM_001001985:56   | Nat8l      | INSIDE                 | 0.317                                           | 0.731                            | 2467.43             | 1804.16             | 0.232                            | 2011.04             | 465.66              |
| A_68_P23592028 | chr5:34340360-34340404                            | NM_001001985:1750 | Nat8l      | INSIDE                 | 0.193                                           | 0.513                            | 2354.20             | 1207.24             | 0.099                            | 1755.93             | 173.82              |
| A_68_P20640025 | chr1:137429239-137429283                          | NM_173437:52672   | Nav1       | INSIDE                 | 0.533                                           | 2.979                            | 2700.63             | 8045.90             | 1.589                            | 1960.85             | 3116.36             |
| A_68_P25111230 | chr9:56501781-56501825                            | NM_175272:244     | Nav2       | INSIDE                 | 0.350                                           | 0.442                            | 2139.56             | 945.58              | 0.155                            | 1491.83             | 231.03              |
| A_68_P25111235 | chr7:56502306-56502350                            | NM_175272:770     | Nav2       | INSIDE                 | 0.377                                           | 0.475                            | 2103.45             | 998.59              | 0.179                            | 1602.07             | 287.07              |
| A_68_P22157975 | chr3:55986717-55986761                            | NM_030595:885     | Nbea       | INSIDE                 | 0.234                                           | 0.481                            | 1636.72             | 786.77              | 0.112                            | 1228.86             | 138.21              |
| A_68_P26824826 | chr9:110532797-110532841                          | NM_183276:23847   | Nbeal2     | INSIDE                 | 0.648                                           | 2.812                            | 2334.25             | 6563.42             | 1.822                            | 1637.31             | 2983.00             |
| A_68_P23349653 | chr4:138648926-138648970                          | NM_008675:-63     | Nbl1       | PROMOTER               | 0.289                                           | 0.597                            | 1053.71             | 628.70              | 0.173                            | 887.58              | 153.14              |
| A_68_P22752527 | chr4:15885475-15885519                            | NM_013752:383     | Nbn        | INSIDE                 | 0.595                                           | 0.493                            | 1053.71             | 519.57              | 0.293                            | 793.14              | 232.50              |
| A_68_P26500006 | chr9:49605230-49605274                            | NM_001081445:1922 | Ncam1      | INSIDE                 | 0.549                                           | 0.306                            | 2266.14             | 694.34              | 0.168                            | 1697.68             | 285.48              |
| A_68_P25949908 | chr8:72636524-72636568                            | NM_007789:8197    | Ncan       | INSIDE                 | 0.367                                           | 0.582                            | 1171.23             | 681.59              | 0.213                            | 918.64              | 195.95              |
| A_68_P24819297 | chr6:125141590-125141635                          | NM_146171:-8      | Ncapd2     | DIVERGENT_PROMOTER     | 0.123                                           | 0.585                            | 2401.71             | 1405.14             | 0.072                            | 1778.15             | 127.85              |
| A_68_P24819298 | chr6:125141713-125141757                          | NM_146171:-130    | Ncapd2     | DIVERGENT_PROMOTER     | 0.630                                           | 0.547                            | 1865.58             | 1021.21             | 0.345                            | 1373.52             | 473.75              |
| A_68_P24819299 | chr6:125141841-125141885                          | NM_146171:-258    | Ncapd2     | DIVERGENT_PROMOTER     | 0.176                                           | 0.434                            | 2165.18             | 938.70              | 0.076                            | 1579.73             | 120.74              |
| A_68_P26373646 | chr9:26838450-26838494                            | NM_178113:713     | Ncapd3     | INSIDE                 | 0.292                                           | 0.575                            | 1380.17             | 793.06              | 0.168                            | 1032.90             | 173.47              |
| A_68_P23657846 | chr5:46060767-46060811                            | NM_019438:-375    | Ncapg      | PROMOTER               | 0.231                                           | 0.607                            | 2072.32             | 1257.71             | 0.140                            | 1388.98             | 194.68              |
| A_68_P28767700 | chr12:117643877-117643921                         | NM_133762:24      | Ncapg2     | INSIDE                 | 0.142                                           | 2.324                            | 8194.30             | 19044.50            | 0.330                            | 5306.27             | 1749.19             |
| A_68_P30650229 | chr16:31948693-31948737                           | NM_026554:83      | Ncbp2      | INSIDE                 | 0.361                                           | 0.627                            | 861.15              | 539.74              | 0.226                            | 686.61              | 155.30              |
| A_68_P23281848 | chr4:126430490-126430534                          | NM_011986:161     | Ncdn       | INSIDE                 | 0.467                                           | 0.557                            | 1957.44             | 1090.81             | 0.260                            | 1608.46             | 418.21              |
| A_68_P22009787 | chr3:27081688-27081732                            | NM_178772:-215    | Nceh1      | PROMOTER               | 0.576                                           | 0.702                            | 2056.24             | 1443.40             | 0.404                            | 1651.64             | 667.85              |

| ProbeName      | Target position of probe on CpG island microarray | TargetID          | GeneSymbol | CpG island Description | Ratio of relative methylation (TiO2-NP/Vehicle) | Sham group                       |                     |                     | TiO <sub>2</sub> -H group        |                     |                     |
|----------------|---------------------------------------------------|-------------------|------------|------------------------|-------------------------------------------------|----------------------------------|---------------------|---------------------|----------------------------------|---------------------|---------------------|
|                |                                                   |                   |            |                        |                                                 | Relative methylation (Cy-5/Cy-3) | Cy-3 signal (Input) | Cy-5 signal (MeDIP) | Relative methylation (Cy-5/Cy-3) | Cy-3 signal (Input) | Cy-5 signal (MeDIP) |
| A_68_P24112020 | chr5:134697723-134697767                          | NM_010876:7751    | Ncf1       | INSIDE                 | 0.205                                           | 1.742                            | 3557.52             | 6197.13             | 0.357                            | 2328.54             | 831.60              |
| A_68_P20188963 | chr1:43503219-43503263                            | NM_010879:645     | Nck2       | INSIDE                 | 0.529                                           | 0.657                            | 2062.99             | 1356.04             | 0.347                            | 1601.98             | 556.67              |
| A_68_P20188964 | chr1:43503293-43503346                            | NM_010879:724     | Nck2       | INSIDE                 | 0.161                                           | 0.474                            | 2440.58             | 1157.83             | 0.077                            | 1623.29             | 124.31              |
| A_68_P20590467 | chr1:128389351-128389395                          | NM_172484:132     | Nckap5     | INSIDE                 | 0.496                                           | 0.592                            | 1414.93             | 837.30              | 0.293                            | 1179.18             | 346.01              |
| A_68_P30480286 | chr15:99288275-99288319                           | NM_001001884:-117 | Nckap5l    | PROMOTER               | 0.357                                           | 0.659                            | 2150.11             | 1417.18             | 0.235                            | 1582.58             | 371.87              |
| A_68_P30480289 | chr15:99288589-99288642                           | NM_001001884:-436 | Nckap5l    | PROMOTER               | 0.232                                           | 0.587                            | 1160.68             | 681.02              | 0.136                            | 876.01              | 119.15              |
| A_68_P27290092 | chr10:80958931-80958975                           | NM_134009:156     | Ncln       | INSIDE                 | 0.597                                           | 0.544                            | 3936.53             | 2141.26             | 0.325                            | 2844.15             | 923.92              |
| A_68_P27290096 | chr10:80959275-80959319                           | NM_134009:-188    | Ncln       | PROMOTER               | 0.247                                           | 0.505                            | 1653.89             | 834.60              | 0.125                            | 1263.69             | 157.70              |
| A_68_P21826986 | chr2:165818945-165818989                          | NM_008679:830     | Ncoa3      | INSIDE                 | 0.165                                           | 1.974                            | 6308.14             | 12453.14            | 0.327                            | 4331.62             | 1414.75             |
| A_68_P29515925 | chr14:32978942-32978986                           | NM_019744:-13     | Ncoa4      | PROMOTER               | 0.488                                           | 0.384                            | 1559.27             | 598.63              | 0.188                            | 1418.60             | 266.00              |
| A_68_P21821252 | chr2:164859772-164859816                          | NM_144892:485     | Ncoa5      | INSIDE                 | 0.612                                           | 0.593                            | 930.67              | 552.14              | 0.363                            | 804.09              | 291.83              |
| A_68_P21821258 | chr2:164860465-164860509                          | NM_144892:-207    | Ncoa5      | PROMOTER               | 0.303                                           | 0.546                            | 1543.78             | 842.66              | 0.165                            | 1208.50             | 199.80              |
| A_68_P27041530 | chr10:30522669-30522713                           | NM_172495:223     | Ncoa7      | INSIDE                 | 0.554                                           | 0.548                            | 1606.18             | 880.11              | 0.304                            | 1306.02             | 396.82              |
| A_68_P21107803 | chr2:31101353-31101397                            | NM_019681:-68     | Ncs1       | PROMOTER               | 0.664                                           | 0.440                            | 1396.79             | 614.35              | 0.292                            | 1184.54             | 345.76              |
| A_68_P21107807 | chr2:31101894-31101938                            | NM_019681:474     | Ncs1       | INSIDE                 | 0.151                                           | 0.584                            | 1890.14             | 1103.28             | 0.088                            | 1415.86             | 125.00              |
| A_68_P21070911 | chr2:25110830-25110874                            | NM_001082476:82   | Ndor1      | INSIDE                 | 0.268                                           | 0.703                            | 1591.65             | 1119.44             | 0.188                            | 1185.44             | 223.34              |
| A_68_P30295267 | chr15:66800261-66800306                           | NM_008681:920     | Ndrp1      | INSIDE                 | 0.131                                           | 0.714                            | 5724.36             | 4086.71             | 0.094                            | 3879.17             | 363.39              |
| A_68_P30295270 | chr15:66800532-66800576                           | NM_008681:649     | Ndrp1      | INSIDE                 | 0.459                                           | 0.395                            | 1964.70             | 775.97              | 0.181                            | 1550.23             | 280.93              |
| A_68_P30295276 | chr15:66801140-66801184                           | NM_008681:41      | Ndrp1      | INSIDE                 | 0.177                                           | 0.434                            | 3852.04             | 1672.29             | 0.077                            | 3098.07             | 238.36              |
| A_68_P30295277 | chr15:66801273-66801317                           | NM_008681:-91     | Ndrp1      | PROMOTER               | 0.652                                           | 0.392                            | 1920.63             | 753.31              | 0.256                            | 1429.87             | 365.71              |
| A_68_P29603748 | chr14:52533567-52533611                           | NM_001145959:-425 | Ndrp2      | DIVERGENT_PROMOTER     | 0.407                                           | 0.480                            | 1560.30             | 749.06              | 0.196                            | 1153.20             | 225.46              |
| A_68_P20449354 | chr1:94370335-94370379                            | NM_024197:-21     | Ndufa10    | PROMOTER               | 0.570                                           | 0.602                            | 980.29              | 589.81              | 0.343                            | 669.35              | 229.49              |
| A_68_P20449355 | chr1:94370405-94370449                            | NM_024197:-91     | Ndufa10    | PROMOTER               | 0.534                                           | 0.626                            | 889.06              | 556.74              | 0.334                            | 644.07              | 215.30              |
| A_68_P31257925 | chr17:56857454-56857498                           | NM_027244:292     | Ndufa11    | INSIDE                 | 0.285                                           | 0.710                            | 2636.33             | 1871.06             | 0.202                            | 1931.98             | 390.66              |
| A_68_P25948617 | chr8:72426740-72426784                            | NM_023312:-305    | Ndufa13    | PROMOTER               | 0.466                                           | 0.541                            | 1871.68             | 1012.20             | 0.252                            | 1402.86             | 353.32              |
| A_68_P25948618 | chr8:72426813-72426857                            | NM_023312:-377    | Ndufa13    | PROMOTER               | 0.267                                           | 0.444                            | 2442.87             | 1083.58             | 0.118                            | 1777.55             | 210.55              |
| A_68_P31625586 | chr18:36903899-36903943                           | NM_010885:282     | Ndufa2     | INSIDE                 | 0.568                                           | 0.515                            | 1076.74             | 554.72              | 0.293                            | 943.88              | 276.09              |
| A_68_P31625587 | chr18:36904013-36904057                           | NM_010885:168     | Ndufa2     | INSIDE                 | 0.488                                           | 0.706                            | 2629.35             | 1855.44             | 0.344                            | 1958.35             | 674.10              |
| A_68_P31625589 | chr18:36904175-36904219                           | NM_010885:6       | Ndufa2     | INSIDE                 | 0.246                                           | 0.535                            | 1190.46             | 637.10              | 0.132                            | 897.44              | 118.28              |
| A_68_P24302042 | chr6:24477224-24477272                            | NM_026614:439     | Ndufa5     | INSIDE                 | 0.258                                           | 0.498                            | 1296.76             | 646.39              | 0.129                            | 1005.79             | 129.36              |
| A_68_P24302044 | chr6:24477440-24477484                            | NM_026614:225     | Ndufa5     | INSIDE                 | 0.277                                           | 0.567                            | 3081.87             | 1747.08             | 0.157                            | 2370.37             | 372.60              |
| A_68_P29309818 | chr13:108948386-108948430                         | NM_001127346:411  | Ndufaf2    | INSIDE                 | 0.259                                           | 0.540                            | 2197.54             | 1186.04             | 0.140                            | 1671.17             | 233.20              |
| A_68_P26815490 | chr9:108469907-108469951                          | NM_023247:-255    | Ndufaf3    | DIVERGENT_PROMOTER     | 0.115                                           | 0.441                            | 3490.45             | 1538.00             | 0.051                            | 2500.22             | 126.94              |
| A_68_P26815491 | chr9:108470017-108470061                          | NM_023247:-365    | Ndufaf3    | DIVERGENT_PROMOTER     | 0.173                                           | 0.533                            | 1780.83             | 948.68              | 0.092                            | 1342.15             | 123.59              |
| A_68_P26815492 | chr9:108470126-108470170                          | NM_023247:-475    | Ndufaf3    | DIVERGENT_PROMOTER     | 0.155                                           | 1.401                            | 2272.14             | 3182.58             | 0.217                            | 1525.04             | 331.05              |
| A_68_P22788124 | chr4:24825414-24825458                            | NM_026742:207     | Ndufaf4    | INSIDE                 | 0.355                                           | 0.524                            | 2453.41             | 1284.42             | 0.186                            | 1765.45             | 328.39              |
| A_68_P31099229 | chr17:24861250-24861296                           | NM_026684:61      | Ndufb10    | INSIDE                 | 0.177                                           | 0.711                            | 2065.37             | 1468.64             | 0.126                            | 1496.96             | 188.66              |
| A_68_P22856642 | chr4:40226159-40226203                            | NM_001033305:221  | Ndufb6     | INSIDE                 | 0.596                                           | 0.436                            | 2086.76             | 910.02              | 0.260                            | 1462.95             | 380.38              |
| A_68_P32132944 | chr19:44629890-44629934                           | NM_026061:-7      | Ndufb8     | DIVERGENT_PROMOTER     | 0.522                                           | 0.648                            | 876.50              | 568.25              | 0.338                            | 721.40              | 244.16              |
| A_68_P22129477 | chr3:51212635-51212679                            | NM_025523:221     | Ndufc1     | INSIDE                 | 0.621                                           | 0.612                            | 1563.98             | 957.33              | 0.380                            | 1247.67             | 473.94              |
| A_68_P22129478 | chr3:51212746-51212790                            | NM_025523:109     | Ndufc1     | INSIDE                 | 0.282                                           | 0.487                            | 2313.80             | 1126.57             | 0.137                            | 1725.09             | 237.16              |
| A_68_P22129479 | chr3:51212850-51212894                            | NM_025523:5       | Ndufc1     | INSIDE                 | 0.460                                           | 0.562                            | 1329.95             | 747.02              | 0.258                            | 1022.55             | 264.13              |
| A_68_P25350314 | chr7:104548897-104548941                          | NM_024220:406     | Ndufc2     | INSIDE                 | 0.474                                           | 0.708                            | 1873.10             | 1326.63             | 0.336                            | 1456.45             | 488.82              |
| A_68_P20285508 | chr1:63223074-63223120                            | NM_001160038:300  | Ndufs1     | INSIDE                 | 0.248                                           | 0.586                            | 1008.39             | 591.00              | 0.145                            | 822.94              | 119.39              |

| ProbeName      | Target position of probe on CpG island microarray | TargetID          | GeneSymbol | CpG island Description | Ratio of relative methylation (TiO2-NP/Vehicle) | Sham group                       |                     |                     | TiO <sub>2</sub> -H group        |                     |                     |
|----------------|---------------------------------------------------|-------------------|------------|------------------------|-------------------------------------------------|----------------------------------|---------------------|---------------------|----------------------------------|---------------------|---------------------|
|                |                                                   |                   |            |                        |                                                 | Relative methylation (Cy-5/Cy-3) | Cy-3 signal (Input) | Cy-5 signal (MeDIP) | Relative methylation (Cy-5/Cy-3) | Cy-3 signal (Input) | Cy-5 signal (MeDIP) |
| A_68_P20826868 | chr1:173177287-173177331                          | NM_153064:-65     | Ndufs2     | DIVERGENT_PROMOTER     | 0.279                                           | 0.570                            | 910.55              | 519.24              | 0.159                            | 736.87              | 117.21              |
| A_68_P20826869 | chr1:173177373-173177425                          | NM_153064:-155    | Ndufs2     | DIVERGENT_PROMOTER     | 0.143                                           | 0.695                            | 1648.83             | 1145.93             | 0.099                            | 1175.65             | 116.93              |
| A_68_P29139136 | chr13:73466105-73466159                           | NM_010888:-202    | Ndufs6     | DIVERGENT_PROMOTER     | 0.264                                           | 0.636                            | 1318.25             | 838.33              | 0.168                            | 1001.16             | 168.12              |
| A_68_P22748787 | chr4:15076098-15076142                            | NM_178617:158     | Necab1     | INSIDE                 | 0.331                                           | 0.639                            | 4194.84             | 2680.58             | 0.212                            | 3139.91             | 664.84              |
| A_68_P21761151 | chr2:154384393-154384437                          | NM_021546:175     | Necab3     | INSIDE                 | 0.324                                           | 1.466                            | 1381.50             | 2025.28             | 0.475                            | 1131.57             | 537.67              |
| A_68_P24810880 | chr6:122824802-122824859                          | NM_026267:256     | Necap1     | INSIDE                 | 0.365                                           | 0.520                            | 1498.27             | 778.43              | 0.190                            | 1145.87             | 217.19              |
| A_68_P23362016 | chr4:140633999-140634043                          | NM_025383:240     | Necap2     | INSIDE                 | 0.313                                           | 0.457                            | 1134.93             | 518.54              | 0.143                            | 939.91              | 134.60              |
| A_68_P23362017 | chr4:140634100-140634144                          | NM_025383:138     | Necap2     | INSIDE                 | 0.267                                           | 0.685                            | 1299.10             | 890.49              | 0.183                            | 962.95              | 176.55              |
| A_68_P27560503 | chr11:4847990-4848034                             | NM_010904:55      | Nefh       | INSIDE                 | 0.542                                           | 0.436                            | 2764.76             | 1204.94             | 0.236                            | 2271.19             | 536.02              |
| A_68_P29689072 | chr14:68701679-68701726                           | NM_010910:-238    | Nefl       | PROMOTER               | 0.172                                           | 1.428                            | 1057.46             | 1510.57             | 0.245                            | 821.26              | 201.25              |
| A_68_P29689075 | chr14:68701929-68701973                           | NM_010910:10      | Nefl       | INSIDE                 | 0.312                                           | 0.676                            | 3074.89             | 2078.21             | 0.211                            | 2344.48             | 495.11              |
| A_68_P29689076 | chr14:68702020-68702064                           | NM_010910:102     | Nefl       | INSIDE                 | 0.263                                           | 0.609                            | 1345.69             | 819.39              | 0.160                            | 980.66              | 156.81              |
| A_68_P29689081 | chr14:68702832-68702876                           | NM_010910:914     | Nefl       | INSIDE                 | 0.504                                           | 0.601                            | 1916.37             | 1151.87             | 0.303                            | 1448.18             | 438.39              |
| A_68_P29689083 | chr14:68703035-68703085                           | NM_010910:1120    | Nefl       | INSIDE                 | 0.286                                           | 0.585                            | 1767.07             | 1033.39             | 0.167                            | 1351.09             | 226.08              |
| A_68_P29689305 | chr14:68743026-68743070                           | NM_008691:13      | Nefm       | INSIDE                 | 0.288                                           | 0.449                            | 5041.87             | 2261.94             | 0.129                            | 4106.09             | 529.88              |
| A_68_P29689306 | chr14:68743165-68743210                           | NM_008691:-126    | Nefm       | PROMOTER               | 0.158                                           | 0.541                            | 1964.20             | 1062.64             | 0.086                            | 1348.78             | 115.38              |
| A_68_P22674486 | chr3:156225270-156225314                          | NM_177274:370     | Negr1      | INSIDE                 | 0.223                                           | 0.573                            | 2338.36             | 1338.93             | 0.128                            | 1657.76             | 212.05              |
| A_68_P26797102 | chr9:105297505-105297549                          | NM_172461:91      | Nek11      | INSIDE                 | 0.607                                           | 0.404                            | 1654.00             | 667.97              | 0.245                            | 1435.81             | 352.11              |
| A_68_P29508895 | chr14:31764856-31764900                           | NM_011849:205     | Nek4       | INSIDE                 | 0.327                                           | 0.545                            | 1412.27             | 769.22              | 0.178                            | 1179.76             | 209.82              |
| A_68_P29508896 | chr14:31764964-31765008                           | NM_011849:313     | Nek4       | INSIDE                 | 0.435                                           | 0.666                            | 1633.10             | 1088.41             | 0.290                            | 1378.71             | 399.28              |
| A_68_P25115904 | chr7:57230774-57230819                            | NM_001037906:77   | Nell1      | INSIDE                 | 0.281                                           | 1.345                            | 2100.10             | 2825.20             | 0.378                            | 1473.11             | 556.36              |
| A_68_P20937428 | chr1:193141556-193141600                          | NM_025424:419     | Nenf       | INSIDE                 | 0.172                                           | 0.636                            | 1542.92             | 981.71              | 0.109                            | 1296.83             | 141.61              |
| A_68_P22310997 | chr3:87774900-87774944                            | NM_016701:-92     | Nes        | PROMOTER               | 0.220                                           | 0.611                            | 1215.89             | 743.21              | 0.134                            | 933.88              | 125.51              |
| A_68_P22310998 | chr3:87774969-87775013                            | NM_016701:-24     | Nes        | PROMOTER               | 0.293                                           | 0.474                            | 2870.67             | 1359.97             | 0.139                            | 2059.17             | 285.72              |
| A_68_P32148153 | chr19:47254029-47254073                           | NM_021360:741     | Neur1a     | INSIDE                 | 0.274                                           | 0.719                            | 2005.46             | 1442.43             | 0.197                            | 1556.76             | 307.34              |
| A_68_P32148154 | chr19:47254136-47254180                           | NM_021360:849     | Neur1a     | INSIDE                 | 0.543                                           | 6.887                            | 11150.18            | 76794.00            | 3.742                            | 7444.01             | 27859.02            |
| A_68_P21820019 | chr2:164658808-164658852                          | NM_001082974:266  | Neur2      | INSIDE                 | 0.445                                           | 0.576                            | 2329.81             | 1342.62             | 0.256                            | 1695.38             | 434.57              |
| A_68_P21820020 | chr2:164658912-164658956                          | NM_001082974:162  | Neur2      | INSIDE                 | 0.581                                           | 0.624                            | 2133.92             | 1331.60             | 0.363                            | 1653.66             | 600.01              |
| A_68_P21820025 | chr2:164659401-164659445                          | NM_001082974:-326 | Neur2      | PROMOTER               | 0.324                                           | 0.551                            | 2199.28             | 1212.46             | 0.178                            | 1636.93             | 292.07              |
| A_68_P20147268 | chr1:36326573-36326617                            | NM_153408:3676    | Neur3      | INSIDE                 | 0.570                                           | 3.028                            | 2584.59             | 7827.19             | 1.726                            | 1746.11             | 3013.23             |
| A_68_P27897807 | chr11:69715139-69715183                           | NM_001013414:-219 | Neur4      | DIVERGENT_PROMOTER     | 0.602                                           | 0.370                            | 2029.20             | 751.82              | 0.223                            | 1519.97             | 338.98              |
| A_68_P27897808 | chr11:69715226-69715270                           | NM_001013414:-131 | Neur4      | DIVERGENT_PROMOTER     | 0.220                                           | 0.490                            | 1412.54             | 692.69              | 0.108                            | 1118.73             | 120.59              |
| A_68_P27897812 | chr11:69715753-69715797                           | NM_001013414:395  | Neur4      | INSIDE                 | 0.655                                           | 0.546                            | 1649.75             | 900.96              | 0.358                            | 1233.32             | 441.15              |
| A_68_P28055687 | chr11:98188542-98188588                           | NM_010895:2395    | Neurod2    | INSIDE                 | 0.204                                           | 0.561                            | 1453.35             | 815.91              | 0.115                            | 1156.57             | 132.64              |
| A_68_P28055689 | chr11:98188746-98188790                           | NM_010895:2191    | Neurod2    | INSIDE                 | 0.316                                           | 0.447                            | 1637.45             | 732.22              | 0.141                            | 1423.29             | 201.24              |
| A_68_P28055765 | chr11:98199818-98199862                           | NM_010895:-8881   | Neurod2    | PROMOTER               | 0.338                                           | 0.529                            | 1873.82             | 992.10              | 0.179                            | 1372.85             | 245.61              |
| A_68_P29060115 | chr13:56353410-56353454                           | NM_010896:92      | Neurog1    | INSIDE                 | 0.601                                           | 0.682                            | 2951.80             | 2013.31             | 0.410                            | 2345.20             | 961.68              |
| A_68_P22509724 | chr3:127336069-127336113                          | NM_009718:28      | Neurog2    | INSIDE                 | 0.283                                           | 0.382                            | 1512.09             | 576.95              | 0.108                            | 1244.62             | 134.27              |
| A_68_P22509733 | chr3:127337069-127337113                          | NM_009718:1028    | Neurog2    | INSIDE                 | 0.394                                           | 0.536                            | 1400.00             | 750.34              | 0.211                            | 1146.46             | 242.10              |
| A_68_P27184368 | chr10:61595655-61595699                           | NM_009719:-161    | Neurog3    | PROMOTER               | 0.391                                           | 0.630                            | 2160.43             | 1360.12             | 0.246                            | 1755.04             | 431.48              |
| A_68_P27184376 | chr10:61596437-61596481                           | NM_009719:621     | Neurog3    | INSIDE                 | 0.214                                           | 0.611                            | 4051.69             | 2475.51             | 0.131                            | 2544.56             | 332.73              |
| A_68_P27184377 | chr10:61596546-61596590                           | NM_009719:731     | Neurog3    | INSIDE                 | 0.138                                           | 0.702                            | 4953.55             | 3479.40             | 0.097                            | 3214.96             | 312.33              |
| A_68_P26143994 | chr8:109817474-109817518                          | NM_018823:127     | Nfat5      | INSIDE                 | 0.268                                           | 0.602                            | 904.00              | 544.53              | 0.161                            | 757.62              | 122.26              |
| A_68_P31866297 | chr18:80904269-80904314                           | NM_001164111:621  | Nfatc1     | INSIDE                 | 0.597                                           | 0.618                            | 1196.16             | 738.86              | 0.369                            | 1035.19             | 381.56              |

| ProbeName      | Target position of probe on CpG island microarray | TargetID            | GeneSymbol | CpG island Description | Ratio of relative methylation (TiO2-NP/Vehicle) | Sham group                       |                     |                     | TiO <sub>2</sub> -H group        |                     |                     |
|----------------|---------------------------------------------------|---------------------|------------|------------------------|-------------------------------------------------|----------------------------------|---------------------|---------------------|----------------------------------|---------------------|---------------------|
|                |                                                   |                     |            |                        |                                                 | Relative methylation (Cy-5/Cy-3) | Cy-3 signal (Input) | Cy-5 signal (MeDIP) | Relative methylation (Cy-5/Cy-3) | Cy-3 signal (Input) | Cy-5 signal (MeDIP) |
| A_68_P31866349 | chr18:80910082-80910126                           | NM_001164110:-294   | Nfatc1     | PROMOTER               | 0.434                                           | 0.568                            | 2641.35             | 1501.07             | 0.247                            | 2097.65             | 517.57              |
| A_68_P31866356 | chr18:80910683-80910727                           | NM_001164110:-894   | Nfatc1     | PROMOTER               | 0.098                                           | 0.682                            | 2648.16             | 1806.05             | 0.067                            | 1876.69             | 125.67              |
| A_68_P21842414 | chr2:168415753-168415797                          | NM_001136073:-83    | Nfatc2     | PROMOTER               | 0.593                                           | 0.657                            | 2148.69             | 1411.51             | 0.390                            | 1208.10             | 470.89              |
| A_68_P21842484 | chr2:168426628-168426674                          | NM_001037178:505    | Nfatc2     | INSIDE                 | 0.320                                           | 0.543                            | 1560.13             | 847.85              | 0.174                            | 1209.19             | 210.28              |
| A_68_P21842485 | chr2:168426812-168426856                          | NM_001037178:321    | Nfatc2     | INSIDE                 | 0.562                                           | 0.424                            | 1492.40             | 632.27              | 0.238                            | 1299.45             | 309.63              |
| A_68_P21842487 | chr2:168427037-168427082                          | NM_001037178:96     | Nfatc2     | INSIDE                 | 0.583                                           | 0.632                            | 2127.20             | 1343.38             | 0.368                            | 1665.96             | 612.90              |
| A_68_P29620047 | chr14:56442581-56442635                           | NM_001168346:-1023  | Nfatc4     | PROMOTER               | 0.242                                           | 0.553                            | 1077.63             | 595.69              | 0.134                            | 908.41              | 121.71              |
| A_68_P28047030 | chr11:96690616-96690669                           | NM_001130451:-5201  | Nfe211     | PROMOTER               | 0.231                                           | 0.568                            | 1541.58             | 875.05              | 0.131                            | 1166.96             | 152.97              |
| A_68_P21345533 | chr2:75542035-75542079                            | NM_010902:642       | Nfe212     | INSIDE                 | 0.519                                           | 0.523                            | 1396.72             | 730.30              | 0.271                            | 1119.48             | 303.92              |
| A_68_P21345534 | chr2:75542163-75542207                            | NM_010902:514       | Nfe212     | INSIDE                 | 0.557                                           | 0.483                            | 2548.48             | 1229.88             | 0.269                            | 2074.48             | 557.51              |
| A_68_P21345538 | chr2:75542631-75542675                            | NM_010902:46        | Nfe212     | INSIDE                 | 0.235                                           | 1.890                            | 1017.95             | 1923.79             | 0.445                            | 717.11              | 318.98              |
| A_68_P21345540 | chr2:75542919-75542963                            | NM_010902:-242      | Nfe212     | PROMOTER               | 0.219                                           | 1.443                            | 9326.85             | 13462.96            | 0.317                            | 5986.99             | 1895.76             |
| A_68_P24444195 | chr6:51382942-51382986                            | NM_010903:296       | Nfe213     | INSIDE                 | 0.260                                           | 0.527                            | 1729.63             | 911.74              | 0.137                            | 1332.69             | 182.34              |
| A_68_P23134122 | chr4:97412574-97412618                            | NM_001122952:163963 | Nfia       | INSIDE                 | 0.188                                           | 0.361                            | 2286.25             | 825.06              | 0.068                            | 1694.82             | 114.91              |
| A_68_P23134315 | chr4:97438906-97438950                            | NM_001122953:-5388  | Nfia       | PROMOTER               | 0.323                                           | 0.625                            | 892.54              | 557.84              | 0.202                            | 796.05              | 160.61              |
| A_68_P23134317 | chr4:97439073-97439121                            | NM_001122953:-5220  | Nfia       | PROMOTER               | 0.247                                           | 1.496                            | 979.20              | 1464.48             | 0.370                            | 748.59              | 276.95              |
| A_68_P23057173 | chr4:82150827-82150874                            | NM_001113209:362    | Nfib       | INSIDE                 | 0.158                                           | 0.512                            | 1950.75             | 997.92              | 0.081                            | 1438.31             | 115.99              |
| A_68_P23057176 | chr4:82151139-82151183                            | NM_001113209:52     | Nfib       | INSIDE                 | 0.273                                           | 0.700                            | 1996.42             | 1398.11             | 0.191                            | 1418.21             | 271.28              |
| A_68_P23057181 | chr4:82151702-82151757                            | NM_001113209:-517   | Nfib       | PROMOTER               | 0.562                                           | 0.645                            | 1116.94             | 719.93              | 0.363                            | 898.38              | 325.68              |
| A_68_P23057187 | chr4:82152716-82152762                            | NM_001113209:-1526  | Nfib       | PROMOTER               | 0.118                                           | 1.803                            | 1003.91             | 1810.13             | 0.213                            | 665.53              | 141.99              |
| A_68_P26021786 | chr8:87295957-87296001                            | NM_001081981:2290   | Nfix       | INSIDE                 | 0.618                                           | 0.439                            | 1489.51             | 653.41              | 0.271                            | 1071.33             | 290.47              |
| A_68_P26021880 | chr8:87308048-87308097                            | NM_001081981:-9804  | Nfix       | PROMOTER               | 0.293                                           | 0.697                            | 1850.78             | 1289.55             | 0.204                            | 1327.75             | 271.33              |
| A_68_P26021884 | chr8:87308434-87308479                            | NM_001081982:15783  | Nfix       | INSIDE                 | 0.251                                           | 0.402                            | 1616.46             | 649.56              | 0.101                            | 1163.98             | 117.58              |
| A_68_P26021885 | chr8:87308549-87308593                            | NM_001081982:15669  | Nfix       | INSIDE                 | 0.234                                           | 0.667                            | 3124.48             | 2083.98             | 0.156                            | 2177.25             | 340.14              |
| A_68_P32143069 | chr19:46379412-46379456                           | NM_019408:-750      | Nfkb2      | PROMOTER               | 0.449                                           | 0.447                            | 2686.41             | 1201.59             | 0.201                            | 2112.99             | 424.67              |
| A_68_P32143106 | chr19:46383535-46383579                           | NM_001177370:3137   | Nfkb2      | INSIDE                 | 0.631                                           | 0.567                            | 1753.43             | 994.37              | 0.358                            | 1356.57             | 485.49              |
| A_68_P25023455 | chr7:29551632-29551677                            | NM_010908:-111      | Nfkbib     | DIVERGENT_PROMOTER     | 0.358                                           | 0.514                            | 1476.67             | 759.70              | 0.184                            | 1146.83             | 211.30              |
| A_68_P25031432 | chr7:31206971-31207015                            | NM_172142:-1330     | Nfkbid     | DIVERGENT_PROMOTER     | 0.227                                           | 0.654                            | 1051.60             | 688.17              | 0.148                            | 792.05              | 117.47              |
| A_68_P31201772 | chr17:45692808-45692853                           | NM_008690:166       | Nfkbie     | INSIDE                 | 0.406                                           | 0.497                            | 1713.85             | 852.26              | 0.202                            | 1237.60             | 249.77              |
| A_68_P31201773 | chr17:45692924-45692968                           | NM_008690:282       | Nfkbie     | INSIDE                 | 0.188                                           | 0.472                            | 1942.55             | 917.53              | 0.089                            | 1348.68             | 119.77              |
| A_68_P26400217 | chr9:31194116-31194160                            | NM_172766:362       | Nfkrb      | INSIDE                 | 0.285                                           | 0.582                            | 1195.13             | 695.01              | 0.166                            | 970.54              | 160.97              |
| A_68_P31217285 | chr17:48548234-48548282                           | NM_001110832:887    | Nfy        | INSIDE                 | 0.604                                           | 0.543                            | 1238.29             | 672.28              | 0.328                            | 995.94              | 326.52              |
| A_68_P31217293 | chr17:48549071-48549115                           | NM_001110832:53     | Nfy        | INSIDE                 | 0.508                                           | 0.742                            | 5210.63             | 3868.13             | 0.377                            | 3695.38             | 1394.35             |
| A_68_P27293629 | chr10:82226162-82226206                           | NM_010914:702       | Nfyb       | INSIDE                 | 0.408                                           | 0.567                            | 1982.74             | 1125.03             | 0.232                            | 1672.39             | 387.54              |
| A_68_P27293631 | chr10:82226680-82226728                           | NM_010914:182       | Nfyb       | INSIDE                 | 0.153                                           | 0.717                            | 1409.74             | 1010.22             | 0.110                            | 1117.02             | 122.44              |
| A_68_P28614145 | chr12:88443030-88443074                           | NM_022414:437       | Ng         | INSIDE                 | 0.272                                           | 0.554                            | 5083.73             | 2817.64             | 0.151                            | 3776.37             | 570.08              |
| A_68_P28614148 | chr12:88443473-88443517                           | NM_022414:-5        | Ng         | PROMOTER               | 0.407                                           | 0.415                            | 1799.48             | 746.75              | 0.169                            | 1681.23             | 284.09              |
| A_68_P29615709 | chr14:55633702-55633746                           | NM_026890:-566      | Ngdn       | PROMOTER               | 0.347                                           | 0.683                            | 1576.78             | 1076.28             | 0.237                            | 1163.61             | 275.85              |
| A_68_P20418214 | chr1:89406592-89406636                            | NM_019867:323       | Ngf        | INSIDE                 | 0.338                                           | 0.484                            | 3915.00             | 1895.24             | 0.164                            | 3017.43             | 493.49              |
| A_68_P28039686 | chr11:95446719-95446763                           | NM_033217:2272      | Ngfr       | INSIDE                 | 0.380                                           | 0.690                            | 1630.84             | 1125.96             | 0.262                            | 1171.77             | 307.46              |
| A_68_P28039696 | chr11:95448025-95448069                           | NM_033217:966       | Ngfr       | INSIDE                 | 0.344                                           | 0.554                            | 1706.15             | 945.41              | 0.191                            | 1239.07             | 236.27              |
| A_68_P29428096 | chr14:17075774-17075818                           | NM_021504:-6031     | Ngly1      | PROMOTER               | 0.347                                           | 0.351                            | 1599.30             | 561.67              | 0.122                            | 1270.14             | 154.81              |
| A_68_P20352130 | chr1:75121478-75121522                            | NM_029342:300       | Nhej1      | INSIDE                 | 0.547                                           | 0.505                            | 1453.54             | 733.90              | 0.276                            | 1120.07             | 309.27              |
| A_68_P20352131 | chr1:75121569-75121613                            | NM_029342:210       | Nhej1      | INSIDE                 | 0.599                                           | 0.565                            | 1094.85             | 618.55              | 0.338                            | 909.93              | 307.82              |

| ProbeName      | Target position of probe on CpG island microarray | TargetID            | GeneSymbol | CpG island Description | Ratio of relative methylation (TiO2-NP/Vehicle) | Sham group                       |                     |                     | TiO <sub>2</sub> -H group        |                     |                     |
|----------------|---------------------------------------------------|---------------------|------------|------------------------|-------------------------------------------------|----------------------------------|---------------------|---------------------|----------------------------------|---------------------|---------------------|
|                |                                                   |                     |            |                        |                                                 | Relative methylation (Cy-5/Cy-3) | Cy-3 signal (Input) | Cy-5 signal (MeDIP) | Relative methylation (Cy-5/Cy-3) | Cy-3 signal (Input) | Cy-5 signal (MeDIP) |
| A_68_P20352132 | chr1:75121636-75121680                            | NM_029342:142       | Nhej1      | INSIDE                 | 0.139                                           | 0.526                            | 2274.82             | 1195.65             | 0.073                            | 1641.83             | 120.23              |
| A_68_P22378546 | chr3:101816277-101816321                          | NM_178777:2231      | Nhlh2      | INSIDE                 | 0.206                                           | 0.441                            | 1622.57             | 715.38              | 0.091                            | 1330.59             | 121.14              |
| A_68_P22378553 | chr3:101816844-101816888                          | NM_178777:2799      | Nhlh2      | INSIDE                 | 0.395                                           | 0.497                            | 2536.22             | 1261.46             | 0.197                            | 2171.96             | 426.83              |
| A_68_P29011093 | chr13:47106234-47106282                           | NM_175340:3961      | Nhlrc1     | DOWNSTREAM             | 0.604                                           | 3.761                            | 2716.80             | 10217.71            | 2.271                            | 1867.85             | 4242.03             |
| A_68_P29011114 | chr13:47109579-47109623                           | NM_175340:619       | Nhlrc1     | INSIDE                 | 0.397                                           | 0.517                            | 1150.56             | 595.40              | 0.206                            | 823.92              | 169.45              |
| A_68_P29011119 | chr13:47110041-47110085                           | NM_175340:157       | Nhlrc1     | INSIDE                 | 0.383                                           | 0.608                            | 5479.66             | 3332.96             | 0.233                            | 4146.81             | 966.73              |
| A_68_P32201474 | chr19:56623518-56623562                           | NM_025811:790       | Nhlrc2     | INSIDE                 | 0.177                                           | 0.666                            | 1445.69             | 963.43              | 0.118                            | 1061.21             | 125.12              |
| A_68_P31107419 | chr17:26088437-26088481                           | NM_001039038:-6582  | Nhlrc4     | PROMOTER               | 0.649                                           | 0.705                            | 1543.19             | 1087.78             | 0.458                            | 1224.04             | 560.00              |
| A_68_P31107425 | chr17:26089202-26089246                           | NM_001039038:-7348  | Nhlrc4     | PROMOTER               | 0.252                                           | 0.645                            | 1005.11             | 648.02              | 0.163                            | 717.95              | 116.80              |
| A_68_P27794923 | chr11:51433377-51433421                           | NM_026631:124       | Nhp2       | INSIDE                 | 0.129                                           | 0.688                            | 5485.20             | 3774.02             | 0.089                            | 3748.07             | 333.08              |
| A_68_P30381130 | chr15:81877398-81877442                           | NM_011482:608       | Nhp2l1     | INSIDE                 | 0.315                                           | 0.708                            | 1465.01             | 1036.69             | 0.223                            | 1070.02             | 238.28              |
| A_68_P30381132 | chr15:81877600-81877644                           | NM_011482:406       | Nhp2l1     | INSIDE                 | 0.376                                           | 0.482                            | 2791.11             | 1346.58             | 0.181                            | 2334.99             | 423.32              |
| A_68_P32786682 | chrX:158346088-158346143                          | NM_001081052:251607 | Nhs        | INSIDE                 | 0.064                                           | 2.986                            | 2136.10             | 6377.93             | 0.192                            | 816.00              | 156.77              |
| A_68_P28833747 | chr13:13530554-13530598                           | NM_010917:708       | Nid1       | INSIDE                 | 0.243                                           | 0.598                            | 969.85              | 579.59              | 0.145                            | 838.52              | 121.56              |
| A_68_P29443159 | chr14:20570751-20570795                           | NM_008695:294       | Nid2       | INSIDE                 | 0.512                                           | 0.519                            | 1191.32             | 618.11              | 0.266                            | 971.94              | 258.12              |
| A_68_P29023783 | chr13:49283461-49283505                           | NM_013610:567       | Ninj1      | INSIDE                 | 0.286                                           | 0.600                            | 926.87              | 555.99              | 0.171                            | 682.64              | 116.94              |
| A_68_P25144263 | chr7:63217306-63217365                            | NM_023647:485       | Nipa2      | INSIDE                 | 0.274                                           | 0.462                            | 1255.49             | 580.62              | 0.127                            | 952.08              | 120.51              |
| A_68_P25144264 | chr7:63217409-63217453                            | NM_023647:390       | Nipa2      | INSIDE                 | 0.185                                           | 0.625                            | 1332.57             | 832.52              | 0.115                            | 1047.59             | 120.90              |
| A_68_P25144265 | chr7:63217530-63217574                            | NM_023647:268       | Nipa2      | INSIDE                 | 0.250                                           | 0.567                            | 979.05              | 554.68              | 0.142                            | 867.32              | 122.89              |
| A_68_P25144267 | chr7:63217811-63217855                            | NM_023647:-12       | Nipa2      | DIVERGENT_PROMOTER     | 0.583                                           | 0.572                            | 1925.68             | 1102.39             | 0.334                            | 1670.82             | 557.86              |
| A_68_P23328803 | chr4:135050627-135050671                          | NM_028995:-229      | Nipal3     | DIVERGENT_PROMOTER     | 0.401                                           | 0.553                            | 1557.06             | 861.22              | 0.222                            | 1180.18             | 261.60              |
| A_68_P23328805 | chr4:135050806-135050850                          | NM_028995:-409      | Nipal3     | DIVERGENT_PROMOTER     | 0.484                                           | 0.603                            | 1098.79             | 663.09              | 0.292                            | 856.25              | 249.85              |
| A_68_P30000041 | chr15:8393675-8393723                             | NM_027707:765       | Nipbl      | INSIDE                 | 0.597                                           | 0.572                            | 1360.81             | 777.79              | 0.341                            | 1211.29             | 413.04              |
| A_68_P30000046 | chr15:8394229-8394273                             | NM_027707:213       | Nipbl      | INSIDE                 | 0.138                                           | 0.424                            | 2560.38             | 1085.56             | 0.059                            | 2056.75             | 120.77              |
| A_68_P22920589 | chr4:53024957-53025001                            | NM_025623:183       | Nipsnap3b  | INSIDE                 | 0.113                                           | 1.672                            | 4718.76             | 7888.37             | 0.190                            | 3202.14             | 607.07              |
| A_68_P22920590 | chr4:53025131-53025175                            | NM_025623:357       | Nipsnap3b  | INSIDE                 | 0.113                                           | 1.461                            | 10345.19            | 15116.54            | 0.166                            | 6698.52             | 1109.63             |
| A_68_P29510443 | chr14:32019604-32019648                           | NM_022656:386       | Nisch      | INSIDE                 | 0.417                                           | 0.679                            | 1573.09             | 1067.41             | 0.283                            | 1272.08             | 360.07              |
| A_68_P30784592 | chr16:57167576-57167629                           | NM_023175:-157      | Niit       | PROMOTER               | 0.236                                           | 0.637                            | 1034.90             | 659.23              | 0.150                            | 801.68              | 120.37              |
| A_68_P27050630 | chr10:32610114-32610158                           | NM_001013411:-415   | Nkain2     | PROMOTER               | 0.418                                           | 0.558                            | 3230.91             | 1803.75             | 0.233                            | 2528.35             | 589.83              |
| A_68_P22771642 | chr4:20705490-20705534                            | NM_172987:303       | Nkain3     | INSIDE                 | 0.612                                           | 0.652                            | 1130.86             | 737.18              | 0.399                            | 956.36              | 381.83              |
| A_68_P22771645 | chr4:20705806-20705850                            | NM_172987:-13       | Nkain3     | PROMOTER               | 0.505                                           | 3.486                            | 10184.38            | 35497.85            | 1.759                            | 7168.92             | 12613.22            |
| A_68_P29142608 | chr13:73984841-73984885                           | NM_028186:217       | Nkd2       | INSIDE                 | 0.500                                           | 0.591                            | 1343.61             | 794.71              | 0.296                            | 1034.83             | 306.07              |
| A_68_P24993777 | chr7:20108952-20108996                            | NM_027116:4895      | Nkpd1      | INSIDE                 | 0.134                                           | 0.706                            | 1525.27             | 1076.21             | 0.094                            | 1239.64             | 117.04              |
| A_68_P24993784 | chr7:20109810-20109854                            | NM_027116:5753      | Nkpd1      | INSIDE                 | 0.171                                           | 0.455                            | 1981.77             | 901.20              | 0.078                            | 1583.94             | 123.46              |
| A_68_P26885085 | chr9:121628083-121628127                          | NM_010918:-194      | Nktr       | PROMOTER               | 0.566                                           | 0.471                            | 1500.13             | 706.12              | 0.267                            | 1164.19             | 310.30              |
| A_68_P25535541 | chr7:139791496-139791540                          | NM_009123:-198      | Nkx1-2     | PROMOTER               | 0.237                                           | 0.396                            | 1501.30             | 595.07              | 0.094                            | 1264.16             | 118.71              |
| A_68_P28457439 | chr12:57634754-57634798                           | NM_001146198:1317   | Nkx2-1     | INSIDE                 | 0.605                                           | 0.467                            | 1609.36             | 751.63              | 0.283                            | 1341.25             | 379.02              |
| A_68_P28457446 | chr12:57635707-57635751                           | NM_001146198:365    | Nkx2-1     | INSIDE                 | 0.624                                           | 0.522                            | 1497.94             | 781.79              | 0.325                            | 1359.08             | 442.38              |
| A_68_P28457454 | chr12:57636900-57636944                           | NM_001146198:-829   | Nkx2-1     | PROMOTER               | 0.395                                           | 0.568                            | 2415.54             | 1372.50             | 0.225                            | 1730.29             | 388.75              |
| A_68_P28457455 | chr12:57637056-57637100                           | NM_001146198:-985   | Nkx2-1     | PROMOTER               | 0.261                                           | 0.679                            | 2448.65             | 1661.89             | 0.177                            | 1953.15             | 346.47              |
| A_68_P28457458 | chr12:57637325-57637369                           | NM_001146198:-1253  | Nkx2-1     | PROMOTER               | 0.270                                           | 0.455                            | 1415.43             | 644.37              | 0.123                            | 970.61              | 119.24              |
| A_68_P21722732 | chr2:147010130-147010174                          | NR_030769:334       | Nkx2-2as   | INSIDE                 | 0.287                                           | 0.629                            | 1165.97             | 732.92              | 0.181                            | 992.36              | 179.16              |
| A_68_P31112704 | chr17:26975881-26975926                           | NM_008700:2607      | Nkx2-5     | INSIDE                 | 0.305                                           | 0.598                            | 3038.79             | 1816.48             | 0.182                            | 2319.96             | 422.79              |
| A_68_P31112724 | chr17:26978218-26978262                           | NM_008700:270       | Nkx2-5     | INSIDE                 | 0.651                                           | 0.639                            | 2373.49             | 1517.28             | 0.416                            | 2003.61             | 833.68              |



| ProbeName      | Target position of probe on CpG island microarray | TargetID           | GeneSymbol | CpG island Description | Ratio of relative methylation (TiO2-NP/Vehicle) | Sham group                       |                     |                     | TiO <sub>2</sub> -H group        |                     |                     |
|----------------|---------------------------------------------------|--------------------|------------|------------------------|-------------------------------------------------|----------------------------------|---------------------|---------------------|----------------------------------|---------------------|---------------------|
|                |                                                   |                    |            |                        |                                                 | Relative methylation (Cy-5/Cy-3) | Cy-3 signal (Input) | Cy-5 signal (MeDIP) | Relative methylation (Cy-5/Cy-3) | Cy-3 signal (Input) | Cy-5 signal (MeDIP) |
| A_68_P31112749 | chr17:26981132-26981187                           | NM_008700:-2649    | Nkx2-5     | PROMOTER               | 0.229                                           | 0.613                            | 1091.76             | 668.73              | 0.140                            | 865.35              | 121.26              |
| A_68_P31112751 | chr17:26981297-26981344                           | NM_008700:-2810    | Nkx2-5     | PROMOTER               | 0.193                                           | 0.683                            | 2648.97             | 1808.06             | 0.132                            | 1957.72             | 257.63              |
| A_68_P31112795 | chr17:26986945-26986989                           | NM_008700:-8456    | Nkx2-5     | PROMOTER               | 0.487                                           | 0.596                            | 1721.05             | 1025.00             | 0.290                            | 1291.32             | 374.77              |
| A_68_P31112797 | chr17:26987123-26987182                           | NM_008700:-8642    | Nkx2-5     | PROMOTER               | 0.178                                           | 1.689                            | 594.11              | 1003.18             | 0.301                            | 401.73              | 120.88              |
| A_68_P31112801 | chr17:26987616-26987660                           | NM_008700:-9128    | Nkx2-5     | PROMOTER               | 0.217                                           | 0.583                            | 1235.25             | 719.91              | 0.126                            | 966.81              | 122.03              |
| A_68_P28457818 | chr12:57714241-57714285                           | NM_008701:9        | Nkx2-9     | INSIDE                 | 0.521                                           | 0.542                            | 1256.19             | 680.95              | 0.283                            | 992.38              | 280.45              |
| A_68_P29694907 | chr14:69808925-69808969                           | NM_010921:198      | Nkx3-1     | INSIDE                 | 0.590                                           | 0.638                            | 1546.71             | 986.36              | 0.376                            | 1204.94             | 453.06              |
| A_68_P29694908 | chr14:69809045-69809089                           | NM_010921:318      | Nkx3-1     | INSIDE                 | 0.333                                           | 0.617                            | 1285.66             | 793.18              | 0.206                            | 1005.25             | 206.76              |
| A_68_P23637406 | chr5:42153189-42153233                            | NM_007524:2249     | Nkx3-2     | INSIDE                 | 0.195                                           | 0.442                            | 1980.72             | 874.64              | 0.086                            | 1472.33             | 127.09              |
| A_68_P23637423 | chr5:42155238-42155282                            | NM_007524:199      | Nkx3-2     | INSIDE                 | 0.132                                           | 0.503                            | 2263.37             | 1138.25             | 0.066                            | 1817.30             | 120.68              |
| A_68_P23637424 | chr5:42155415-42155459                            | NM_007524:23       | Nkx3-2     | INSIDE                 | 0.236                                           | 0.668                            | 5005.43             | 3344.39             | 0.158                            | 3885.17             | 612.69              |
| A_68_P23637425 | chr5:42155503-42155547                            | NM_007524:-65      | Nkx3-2     | PROMOTER               | 0.491                                           | 0.530                            | 2223.40             | 1178.35             | 0.260                            | 1664.94             | 432.94              |
| A_68_P23936294 | chr5:102088064-102088108                          | NM_144955:5644     | Nkx6-1     | DOWNSTREAM             | 0.636                                           | 0.667                            | 1836.63             | 1225.65             | 0.424                            | 1509.94             | 640.58              |
| A_68_P23936297 | chr5:102088485-102088535                          | NM_144955:5220     | Nkx6-1     | INSIDE                 | 0.191                                           | 0.702                            | 1248.69             | 876.50              | 0.134                            | 929.87              | 124.68              |
| A_68_P23936330 | chr5:102092926-102092970                          | NM_144955:782      | Nkx6-1     | INSIDE                 | 0.209                                           | 0.313                            | 2159.98             | 675.14              | 0.065                            | 1813.16             | 118.67              |
| A_68_P25578887 | chr7:146767017-146767061                          | NR_027857:1658     | Nkx6-2     | INSIDE                 | 0.325                                           | 0.674                            | 1031.65             | 695.50              | 0.219                            | 841.23              | 184.36              |
| A_68_P25578888 | chr7:146767137-146767194                          | NR_027857:1531     | Nkx6-2     | INSIDE                 | 0.215                                           | 1.487                            | 770.38              | 1145.54             | 0.320                            | 626.56              | 200.61              |
| A_68_P25578898 | chr7:146768350-146768394                          | NR_027857:324      | Nkx6-2     | INSIDE                 | 0.368                                           | 0.584                            | 1587.11             | 927.23              | 0.215                            | 1164.07             | 250.52              |
| A_68_P25578925 | chr7:146771094-146771138                          | NR_027857:-2420    | Nkx6-2     | PROMOTER               | 0.240                                           | 0.634                            | 1013.49             | 642.24              | 0.152                            | 773.00              | 117.77              |
| A_68_P27969034 | chr11:82721872-82721916                           | NM_145431:3        | Nle1       | INSIDE                 | 0.168                                           | 0.593                            | 1655.59             | 981.13              | 0.100                            | 1210.24             | 120.73              |
| A_68_P22006131 | chr3:26230237-26230281                            | NM_138666:573      | Nlgn1      | INSIDE                 | 0.613                                           | 0.426                            | 1343.22             | 571.62              | 0.261                            | 998.03              | 260.19              |
| A_68_P29288685 | chr13:104899639-104899683                         | NM_029447:34       | Nln        | INSIDE                 | 0.267                                           | 0.502                            | 3750.88             | 1882.96             | 0.134                            | 2717.95             | 364.88              |
| A_68_P20723959 | chr1:154802284-154802330                          | NM_175460:76       | Nmnat2     | INSIDE                 | 0.166                                           | 0.705                            | 1302.24             | 918.59              | 0.117                            | 1007.86             | 117.88              |
| A_68_P20961506 | chr2:3200909-3200953                              | NM_008708:-629     | Nmt2       | PROMOTER               | 0.474                                           | 0.537                            | 1726.64             | 927.27              | 0.255                            | 1287.86             | 328.03              |
| A_68_P20961508 | chr2:3201225-3201269                              | NM_008708:-313     | Nmt2       | PROMOTER               | 0.473                                           | 0.732                            | 2027.47             | 1483.22             | 0.346                            | 1469.18             | 508.10              |
| A_68_P29372955 | chr13:120197789-120197833                         | NM_008710:8        | Nnt        | INSIDE                 | 0.330                                           | 0.607                            | 2162.56             | 1313.26             | 0.201                            | 1778.37             | 356.82              |
| A_68_P26144743 | chr8:109948649-109948693                          | NM_026277:268      | Nob1       | INSIDE                 | 0.472                                           | 0.543                            | 964.11              | 523.06              | 0.256                            | 858.72              | 220.12              |
| A_68_P32103772 | chr19:38893658-38893702                           | NM_021315:47       | Noc3l      | INSIDE                 | 0.253                                           | 0.551                            | 3680.11             | 2025.94             | 0.139                            | 2647.97             | 368.75              |
| A_68_P27180398 | chr10:60881315-60881364                           | NM_013611:620      | Nodal      | INSIDE                 | 0.210                                           | 0.553                            | 1653.01             | 914.21              | 0.116                            | 1045.46             | 121.46              |
| A_68_P28004879 | chr11:89160026-89160082                           | NM_008711:3819     | Nog        | DOWNSTREAM             | 0.153                                           | 0.688                            | 1607.67             | 1106.36             | 0.105                            | 1171.61             | 123.17              |
| A_68_P28004885 | chr11:89160628-89160672                           | NM_008711:3223     | Nog        | DOWNSTREAM             | 0.640                                           | 0.524                            | 1607.08             | 841.78              | 0.335                            | 1359.69             | 455.88              |
| A_68_P28004913 | chr11:89163892-89163940                           | NM_008711:-43      | Nog        | PROMOTER               | 0.212                                           | 0.658                            | 1124.21             | 740.24              | 0.139                            | 882.21              | 122.93              |
| A_68_P28105683 | chr11:107050715-107050759                         | NM_001161329:-41   | Nol1       | PROMOTER               | 0.254                                           | 0.453                            | 1295.12             | 586.91              | 0.115                            | 1151.89             | 132.70              |
| A_68_P31552999 | chr18:23198421-23198469                           | NM_001161483:-1280 | Nol4       | PROMOTER               | 0.310                                           | 0.584                            | 900.37              | 526.13              | 0.181                            | 656.88              | 119.04              |
| A_68_P23567511 | chr5:29761679-29761723                            | NM_001033457:494   | Nom1       | INSIDE                 | 0.271                                           | 0.725                            | 1879.56             | 1363.20             | 0.197                            | 1471.14             | 289.57              |
| A_68_P25096453 | chr7:53289096-53289140                            | NM_153057:53       | Nomo1      | INSIDE                 | 0.378                                           | 0.555                            | 1276.68             | 708.95              | 0.210                            | 1041.00             | 218.28              |
| A_68_P25096457 | chr7:53289487-53289535                            | NM_153057:445      | Nomo1      | INSIDE                 | 0.171                                           | 0.658                            | 1670.73             | 1098.71             | 0.112                            | 1259.93             | 141.59              |
| A_68_P32564062 | chrX:98625083-98625127                            | NM_023144:115      | Nono       | INSIDE                 | 0.133                                           | 2.727                            | 2528.62             | 6895.70             | 0.363                            | 1121.06             | 406.96              |
| A_68_P32564063 | chrX:98625189-98625233                            | NM_023144:221      | Nono       | INSIDE                 | 0.117                                           | 1.638                            | 1939.09             | 3175.27             | 0.191                            | 774.86              | 148.30              |
| A_68_P24818880 | chr6:125082083-125082127                          | NM_138747:204      | Nop2       | INSIDE                 | 0.541                                           | 0.519                            | 4512.78             | 2343.53             | 0.281                            | 3630.37             | 1020.18             |
| A_68_P24818881 | chr6:125082179-125082232                          | NM_138747:305      | Nop2       | INSIDE                 | 0.207                                           | 0.648                            | 1343.94             | 871.34              | 0.134                            | 892.32              | 120.00              |
| A_68_P21628852 | chr2:130099893-130099937                          | NM_024193:-233     | Nop56      | PROMOTER               | 0.661                                           | 0.545                            | 1054.58             | 575.08              | 0.360                            | 795.64              | 286.66              |
| A_68_P20823476 | chr1:172519433-172519477                          | NM_001109985:526   | Nos1ap     | INSIDE                 | 0.239                                           | 0.668                            | 1001.56             | 668.97              | 0.160                            | 765.96              | 122.22              |
| A_68_P27946028 | chr11:78738513-78738557                           | NM_010927:4174     | Nos2       | INSIDE                 | 0.253                                           | 0.622                            | 1056.79             | 656.90              | 0.157                            | 908.50              | 143.06              |

| ProbeName      | Target position of probe on CpG island microarray | TargetID           | GeneSymbol | CpG island Description | Ratio of relative methylation (TiO2-NP/Vehicle) | Sham group                       |                     |                     | TiO <sub>2</sub> -H group        |                     |                     |
|----------------|---------------------------------------------------|--------------------|------------|------------------------|-------------------------------------------------|----------------------------------|---------------------|---------------------|----------------------------------|---------------------|---------------------|
|                |                                                   |                    |            |                        |                                                 | Relative methylation (Cy-5/Cy-3) | Cy-3 signal (Input) | Cy-5 signal (MeDIP) | Relative methylation (Cy-5/Cy-3) | Cy-3 signal (Input) | Cy-5 signal (MeDIP) |
| A_68_P21079208 | chr2:26358390-26358438                            | NM_008714:928      | Notch1     | INSIDE                 | 0.281                                           | 0.633                            | 1567.20             | 991.68              | 0.178                            | 1075.31             | 191.03              |
| A_68_P22357701 | chr3:97817894-97817938                            | NM_010928:456      | Notch2     | INSIDE                 | 0.077                                           | 0.623                            | 3547.43             | 2209.09             | 0.048                            | 2398.52             | 115.09              |
| A_68_P31143793 | chr17:32250971-32251015                           | NM_008716:52805    | Notch3     | DOWNSTREAM             | 0.141                                           | 0.589                            | 1923.80             | 1133.46             | 0.083                            | 1442.95             | 120.04              |
| A_68_P31143941 | chr17:32280371-32280415                           | NM_008716:23405    | Notch3     | INSIDE                 | 0.629                                           | 0.633                            | 1371.65             | 868.42              | 0.398                            | 1249.43             | 497.62              |
| A_68_P24990613 | chr7:19542978-19543022                            | NM_001029877:31764 | Nova2      | INSIDE                 | 0.498                                           | 0.658                            | 1894.30             | 1246.22             | 0.328                            | 1379.28             | 452.06              |
| A_68_P24990653 | chr7:19548237-19548281                            | NM_001029877:37022 | Nova2      | INSIDE                 | 0.584                                           | 0.596                            | 864.84              | 515.06              | 0.348                            | 716.69              | 249.28              |
| A_68_P24990654 | chr7:19548318-19548362                            | NM_001029877:37104 | Nova2      | INSIDE                 | 0.368                                           | 0.671                            | 2332.29             | 1564.36             | 0.247                            | 1919.15             | 473.29              |
| A_68_P31099062 | chr17:24833399-24833444                           | NM_027988:243      | Noxo1      | INSIDE                 | 0.255                                           | 0.530                            | 1205.75             | 639.44              | 0.135                            | 910.91              | 123.16              |
| A_68_P24981699 | chr7:17060079-17060123                            | NM_008718:2029     | Npas1      | INSIDE                 | 0.198                                           | 0.694                            | 1308.38             | 908.12              | 0.137                            | 1075.54             | 147.48              |
| A_68_P24981705 | chr7:17060954-17060998                            | NM_008718:1153     | Npas1      | INSIDE                 | 0.460                                           | 0.485                            | 3392.34             | 1645.38             | 0.223                            | 2717.13             | 606.84              |
| A_68_P24981706 | chr7:17061083-17061127                            | NM_008718:1025     | Npas1      | INSIDE                 | 0.548                                           | 0.582                            | 1004.12             | 584.56              | 0.319                            | 874.17              | 279.13              |
| A_68_P24981708 | chr7:17061429-17061473                            | NM_008718:679      | Npas1      | INSIDE                 | 0.264                                           | 0.541                            | 1054.92             | 570.50              | 0.143                            | 813.15              | 116.19              |
| A_68_P24981712 | chr7:17061914-17061958                            | NM_008718:193      | Npas1      | INSIDE                 | 0.397                                           | 0.712                            | 2890.67             | 2056.71             | 0.283                            | 2241.41             | 633.52              |
| A_68_P20164265 | chr1:39250200-39250244                            | NM_008719:-894     | Npas2      | PROMOTER               | 0.608                                           | 0.623                            | 2167.63             | 1350.98             | 0.379                            | 1748.67             | 662.81              |
| A_68_P20164271 | chr1:39251178-39251222                            | NM_008719:84       | Npas2      | INSIDE                 | 0.481                                           | 0.378                            | 2295.88             | 868.81              | 0.182                            | 1697.49             | 309.03              |
| A_68_P31926194 | chr19:4989799-4989843                             | NM_153553:151      | Npas4      | INSIDE                 | 0.204                                           | 0.494                            | 1799.08             | 889.29              | 0.101                            | 1230.56             | 124.04              |
| A_68_P26521206 | chr9:53345098-53345142                            | NM_001081152:-31   | Npat       | DIVERGENT_PROMOTER     | 0.665                                           | 0.515                            | 1476.63             | 761.04              | 0.343                            | 1089.94             | 373.51              |
| A_68_P20010809 | chr1:5906460-5906507                              | NM_010342:996      | Npbwr1     | INSIDE                 | 0.653                                           | 2.274                            | 1096.84             | 2494.24             | 1.484                            | 766.36              | 1137.20             |
| A_68_P20010810 | chr1:5906552-5906596                              | NM_010342:905      | Npbwr1     | INSIDE                 | 0.369                                           | 1.711                            | 2495.38             | 4269.75             | 0.631                            | 1896.36             | 1195.84             |
| A_68_P20010813 | chr1:5906992-5907041                              | NM_010342:463      | Npbwr1     | INSIDE                 | 0.268                                           | 0.595                            | 1239.20             | 737.49              | 0.159                            | 945.14              | 150.64              |
| A_68_P20010816 | chr1:5907329-5907377                              | NM_010342:127      | Npbwr1     | INSIDE                 | 0.220                                           | 0.567                            | 1229.17             | 697.00              | 0.124                            | 966.44              | 120.31              |
| A_68_P20010817 | chr1:5907429-5907473                              | NM_010342:29       | Npbwr1     | INSIDE                 | 0.152                                           | 0.543                            | 1572.48             | 854.32              | 0.082                            | 1421.97             | 117.09              |
| A_68_P31499628 | chr18:12394947-12394991                           | NM_008720:-73      | Npc1       | PROMOTER               | 0.246                                           | 0.446                            | 1984.24             | 885.73              | 0.110                            | 1492.97             | 163.80              |
| A_68_P28600137 | chr12:86113873-86113917                           | NM_023409:168      | Npc2       | INSIDE                 | 0.566                                           | 0.524                            | 3879.45             | 2034.68             | 0.297                            | 3086.46             | 916.64              |
| A_68_P28600138 | chr12:86114028-86114072                           | NM_023409:12       | Npc2       | INSIDE                 | 0.264                                           | 0.361                            | 2097.68             | 758.08              | 0.096                            | 1556.27             | 148.71              |
| A_68_P30368842 | chr15:79664125-79664169                           | NM_001013360:617   | Npcd       | INSIDE                 | 0.198                                           | 0.707                            | 1360.74             | 961.81              | 0.140                            | 834.02              | 116.60              |
| A_68_P30368844 | chr15:79664362-79664415                           | NM_001013360:375   | Npcd       | INSIDE                 | 0.104                                           | 1.771                            | 891.14              | 1578.34             | 0.184                            | 635.42              | 116.64              |
| A_68_P30368846 | chr15:79664558-79664602                           | NM_001013360:183   | Npcd       | INSIDE                 | 0.339                                           | 0.432                            | 1901.98             | 822.09              | 0.147                            | 1392.49             | 204.25              |
| A_68_P30368850 | chr15:79664958-79665002                           | NM_001013360:-217  | Npcd       | PROMOTER               | 0.193                                           | 0.619                            | 1309.22             | 811.01              | 0.119                            | 975.64              | 116.47              |
| A_68_P28049717 | chr11:97141114-97141159                           | NM_008942:754      | Nppeps     | INSIDE                 | 0.293                                           | 1.593                            | 6250.36             | 9956.81             | 0.467                            | 4024.92             | 1879.83             |
| A_68_P23419143 | chr4:151852331-151852375                          | NM_153424:102      | Nphp4      | INSIDE                 | 0.186                                           | 0.687                            | 2407.37             | 1653.22             | 0.128                            | 1760.58             | 225.08              |
| A_68_P25031675 | chr7:31250465-31250509                            | NR_004443:124      | Nphs1as    | INSIDE                 | 0.222                                           | 0.708                            | 2299.80             | 1628.55             | 0.157                            | 1832.80             | 287.65              |
| A_68_P27693121 | chr11:33063184-33063228                           | NM_008722:-150     | Npm1       | PROMOTER               | 0.117                                           | 0.440                            | 3131.95             | 1379.56             | 0.052                            | 2250.00             | 116.41              |
| A_68_P32140280 | chr19:45823401-45823445                           | NM_008723:631      | Npm3       | INSIDE                 | 0.292                                           | 0.529                            | 1686.66             | 892.00              | 0.154                            | 1223.51             | 188.69              |
| A_68_P20413377 | chr1:88566126-88566173                            | NM_010933:999      | Nppe       | INSIDE                 | 0.171                                           | 0.656                            | 1373.05             | 901.25              | 0.112                            | 1121.32             | 125.56              |
| A_68_P20413379 | chr1:88566390-88566434                            | NM_010933:736      | Nppe       | INSIDE                 | 0.450                                           | 0.533                            | 1446.19             | 770.17              | 0.240                            | 1313.60             | 314.67              |
| A_68_P20413386 | chr1:88567063-88567107                            | NM_010933:64       | Nppe       | INSIDE                 | 0.596                                           | 0.569                            | 1056.02             | 600.65              | 0.339                            | 904.77              | 306.88              |
| A_68_P22325407 | chr3:90269682-90269726                            | NM_008727:84       | Npr1       | INSIDE                 | 0.415                                           | 0.463                            | 2335.39             | 1081.29             | 0.192                            | 1864.58             | 358.54              |
| A_68_P22872798 | chr4:43644462-43644506                            | NM_173788:-322     | Npr2       | PROMOTER               | 0.145                                           | 0.685                            | 3693.85             | 2530.88             | 0.099                            | 2601.01             | 258.44              |
| A_68_P22872799 | chr4:43644616-43644660                            | NM_173788:-168     | Npr2       | PROMOTER               | 0.476                                           | 1.511                            | 3992.20             | 6032.33             | 0.719                            | 2609.02             | 1875.02             |
| A_68_P22872800 | chr4:43644731-43644775                            | NM_173788:-54      | Npr2       | PROMOTER               | 0.288                                           | 1.511                            | 5436.31             | 8213.47             | 0.435                            | 3337.09             | 1451.11             |
| A_68_P30018889 | chr15:11834455-11834499                           | NM_001039181:953   | Npr3       | INSIDE                 | 0.301                                           | 0.597                            | 4118.83             | 2458.74             | 0.180                            | 3024.13             | 543.61              |
| A_68_P30018898 | chr15:11835366-11835410                           | NM_001039181:41    | Npr3       | INSIDE                 | 0.515                                           | 0.443                            | 2915.23             | 1291.08             | 0.228                            | 2417.64             | 551.50              |
| A_68_P30018903 | chr15:11836061-11836105                           | NM_001039181:-653  | Npr3       | PROMOTER               | 0.495                                           | 0.722                            | 1765.01             | 1275.08             | 0.357                            | 1463.43             | 523.00              |

| ProbeName      | Target position of probe on CpG island microarray | TargetID          | GeneSymbol | CpG island Description | Ratio of relative methylation (TiO2-NP/Vehicle) | Sham group                       |                     |                     | TiO <sub>2</sub> -H group        |                     |                     |
|----------------|---------------------------------------------------|-------------------|------------|------------------------|-------------------------------------------------|----------------------------------|---------------------|---------------------|----------------------------------|---------------------|---------------------|
|                |                                                   |                   |            |                        |                                                 | Relative methylation (Cy-5/Cy-3) | Cy-3 signal (Input) | Cy-5 signal (MeDIP) | Relative methylation (Cy-5/Cy-3) | Cy-3 signal (Input) | Cy-5 signal (MeDIP) |
| A_68_P28178576 | chr11:119408102-119408146                         | NM_008730:1010    | Nptx1      | INSIDE                 | 0.276                                           | 0.650                            | 1013.18             | 658.50              | 0.179                            | 666.32              | 119.32              |
| A_68_P28178579 | chr11:119408457-119408501                         | NM_008730:656     | Nptx1      | INSIDE                 | 0.136                                           | 0.696                            | 1871.48             | 1302.93             | 0.095                            | 1301.95             | 123.21              |
| A_68_P24161584 | chr5:145307316-145307360                          | NM_016789:583     | Nptx2      | INSIDE                 | 0.291                                           | 0.593                            | 925.50              | 548.83              | 0.173                            | 691.26              | 119.32              |
| A_68_P30368650 | chr15:79634238-79634282                           | NM_030689:879     | Nptxr      | INSIDE                 | 0.552                                           | 0.707                            | 1287.74             | 910.09              | 0.390                            | 1115.47             | 435.02              |
| A_68_P25934101 | chr8:69212003-69212047                            | NM_016708:-31     | Npy5r      | DIVERGENT_PROMOTER     | 0.261                                           | 0.691                            | 2268.25             | 1566.88             | 0.180                            | 1775.21             | 319.68              |
| A_68_P28058441 | chr11:98635083-98635127                           | NM_145434:1452    | Nr1d1      | INSIDE                 | 0.562                                           | 0.495                            | 1093.90             | 541.80              | 0.278                            | 1028.08             | 286.08              |
| A_68_P29437679 | chr14:19071747-19071791                           | NM_011584:-148    | Nr1d2      | PROMOTER               | 0.292                                           | 1.714                            | 1886.57             | 3233.78             | 0.501                            | 1321.71             | 662.59              |
| A_68_P27357765 | chr10:93610485-93610538                           | NM_011629:-164    | Nr2c1      | PROMOTER               | 0.090                                           | 1.434                            | 2855.08             | 4093.69             | 0.130                            | 1944.92             | 252.30              |
| A_68_P24643145 | chr6:92042439-92042483                            | NM_011630:1049    | Nr2c2      | INSIDE                 | 0.572                                           | 0.443                            | 1697.54             | 752.66              | 0.254                            | 1205.20             | 305.84              |
| A_68_P27095710 | chr10:42303461-42303505                           | NM_152229:-88     | Nr2e1      | PROMOTER               | 0.564                                           | 0.594                            | 1771.51             | 1053.13             | 0.335                            | 1429.46             | 479.08              |
| A_68_P27095770 | chr10:42311388-42311432                           | NM_152229:-8016   | Nr2e1      | PROMOTER               | 0.648                                           | 0.515                            | 1520.31             | 782.29              | 0.333                            | 1203.04             | 401.11              |
| A_68_P29162267 | chr13:78334860-78334904                           | NM_010151:3361    | Nr2f1      | INSIDE                 | 0.062                                           | 1.413                            | 7189.05             | 10158.16            | 0.088                            | 4645.59             | 408.31              |
| A_68_P29162321 | chr13:78342782-78342832                           | NM_010151:-4563   | Nr2f1      | PROMOTER               | 0.224                                           | 0.582                            | 1214.72             | 707.18              | 0.130                            | 912.49              | 119.04              |
| A_68_P29162323 | chr13:78342968-78343012                           | NM_010151:-4747   | Nr2f1      | PROMOTER               | 0.523                                           | 0.627                            | 1214.20             | 761.07              | 0.328                            | 1068.19             | 350.34              |
| A_68_P25210773 | chr7:77502893-77502937                            | NM_009697:2565    | Nr2f2      | INSIDE                 | 0.419                                           | 0.456                            | 1637.13             | 746.81              | 0.191                            | 1360.60             | 260.11              |
| A_68_P25956587 | chr8:73900036-73900080                            | NM_010150:5793    | Nr2f6      | INSIDE                 | 0.557                                           | 0.568                            | 1405.79             | 798.22              | 0.316                            | 1202.23             | 380.34              |
| A_68_P25956629 | chr8:73904896-73904940                            | NM_010150:933     | Nr2f6      | INSIDE                 | 0.256                                           | 0.680                            | 2607.97             | 1773.22             | 0.174                            | 1807.81             | 314.99              |
| A_68_P31640473 | chr18:39648559-39648603                           | NM_008173:-1681   | Nr3c1      | PROMOTER               | 0.472                                           | 1.405                            | 4421.18             | 6213.11             | 0.664                            | 3063.80             | 2033.46             |
| A_68_P25979818 | chr8:79426066-79426110                            | NM_001083906:-318 | Nr3c2      | DIVERGENT_PROMOTER     | 0.226                                           | 0.646                            | 2683.35             | 1734.08             | 0.146                            | 1859.18             | 271.02              |
| A_68_P25979819 | chr8:79426229-79426273                            | NM_001083906:-156 | Nr3c2      | DIVERGENT_PROMOTER     | 0.224                                           | 0.633                            | 1069.13             | 676.55              | 0.142                            | 853.53              | 121.06              |
| A_68_P21240002 | chr2:56966945-56966989                            | NM_013613:483     | Nr4a2      | INSIDE                 | 0.234                                           | 0.598                            | 3165.16             | 1891.41             | 0.140                            | 2717.55             | 380.54              |
| A_68_P21240006 | chr2:56967343-56967388                            | NM_013613:84      | Nr4a2      | INSIDE                 | 0.353                                           | 0.638                            | 2028.46             | 1294.99             | 0.226                            | 1598.35             | 360.64              |
| A_68_P22898162 | chr4:48057954-48057998                            | NM_015743:-6143   | Nr4a3      | PROMOTER               | 0.212                                           | 0.645                            | 2007.57             | 1293.93             | 0.137                            | 1556.05             | 212.88              |
| A_68_P22898164 | chr4:48058319-48058363                            | NM_015743:-5779   | Nr4a3      | PROMOTER               | 0.617                                           | 0.558                            | 2232.91             | 1246.65             | 0.345                            | 1848.83             | 637.15              |
| A_68_P22898179 | chr4:48059988-48060034                            | NM_015743:-4109   | Nr4a3      | PROMOTER               | 0.250                                           | 0.586                            | 1083.45             | 634.62              | 0.147                            | 834.97              | 122.48              |
| A_68_P21150007 | chr2:38565998-38566044                            | NM_139051:4042    | Nr5a1      | INSIDE                 | 0.254                                           | 0.572                            | 1063.30             | 608.59              | 0.145                            | 811.01              | 117.88              |
| A_68_P20648914 | chr1:138845211-138845255                          | NM_001159769:4975 | Nr5a2      | INSIDE                 | 0.266                                           | 0.467                            | 1245.99             | 581.75              | 0.124                            | 956.08              | 118.87              |
| A_68_P20648919 | chr1:138845800-138845844                          | NM_001159769:4385 | Nr5a2      | INSIDE                 | 0.535                                           | 0.399                            | 1742.35             | 696.01              | 0.214                            | 1534.85             | 327.94              |
| A_68_P21151178 | chr2:38780768-38780812                            | NM_010264:1191    | Nr6a1      | INSIDE                 | 0.430                                           | 0.727                            | 3471.77             | 2523.33             | 0.312                            | 2582.24             | 806.87              |
| A_68_P21151183 | chr2:38781338-38781382                            | NM_010264:621     | Nr6a1      | INSIDE                 | 0.595                                           | 0.691                            | 2248.49             | 1553.46             | 0.411                            | 1773.06             | 729.37              |
| A_68_P21070361 | chr2:25036829-25036873                            | NM_025980:573     | Nrarp      | INSIDE                 | 0.285                                           | 0.691                            | 2563.98             | 1771.64             | 0.197                            | 1831.98             | 361.15              |
| A_68_P21070362 | chr2:25036916-25036960                            | NM_025980:661     | Nrarp      | INSIDE                 | 0.282                                           | 0.637                            | 3173.71             | 2022.47             | 0.180                            | 2317.54             | 416.33              |
| A_68_P21070363 | chr2:25037051-25037095                            | NM_025980:795     | Nrarp      | INSIDE                 | 0.182                                           | 0.638                            | 1694.75             | 1080.83             | 0.116                            | 1259.37             | 145.94              |
| A_68_P27211072 | chr10:66748247-66748295                           | NM_001036293:-241 | Nrnf2      | PROMOTER               | 0.226                                           | 0.496                            | 1248.05             | 618.48              | 0.112                            | 1043.39             | 116.87              |
| A_68_P30346012 | chr15:75920669-75920713                           | NM_144847:-247    | Nrnf2      | PROMOTER               | 0.552                                           | 0.670                            | 1346.58             | 901.54              | 0.369                            | 932.08              | 344.37              |
| A_68_P23198683 | chr4:108673036-108673080                          | NM_146150:-351    | Nrd1       | PROMOTER               | 0.355                                           | 0.582                            | 4518.05             | 2629.68             | 0.206                            | 3154.75             | 650.95              |
| A_68_P23198686 | chr4:108673421-108673465                          | NM_146150:33      | Nrd1       | INSIDE                 | 0.080                                           | 0.626                            | 3248.33             | 2032.43             | 0.050                            | 2490.66             | 124.05              |
| A_68_P31622626 | chr18:36356438-36356482                           | NM_001167891:354  | Nrg2       | INSIDE                 | 0.478                                           | 0.582                            | 1174.01             | 683.70              | 0.279                            | 994.54              | 277.10              |
| A_68_P31622630 | chr18:36357100-36357144                           | NM_001167891:-308 | Nrg2       | PROMOTER               | 0.511                                           | 0.452                            | 1860.39             | 840.59              | 0.231                            | 1443.43             | 333.15              |
| A_68_P29554793 | chr14:40285528-40285572                           | NM_001190187:826  | Nrg3       | INSIDE                 | 0.375                                           | 0.638                            | 1011.76             | 645.17              | 0.239                            | 788.74              | 188.77              |
| A_68_P30883587 | chr16:76293685-76293730                           | NM_173440:79587   | Nrip1      | PROMOTER               | 0.465                                           | 1.378                            | 2289.28             | 3155.19             | 0.640                            | 1674.90             | 1072.31             |
| A_68_P30883588 | chr16:76293765-76293824                           | NM_173440:79500   | Nrip1      | INSIDE                 | 0.192                                           | 1.687                            | 1078.55             | 1819.69             | 0.324                            | 767.18              | 248.48              |
| A_68_P25410004 | chr7:116925392-116925436                          | NM_020610:-355    | Nrip3      | PROMOTER               | 0.547                                           | 0.676                            | 1933.21             | 1307.24             | 0.370                            | 1507.09             | 557.46              |
| A_68_P32691811 | chrX:135448869-135448913                          | NM_013724:-78     | Nrk        | PROMOTER               | 0.157                                           | 2.243                            | 12204.76            | 27377.88            | 0.353                            | 4834.37             | 1705.29             |

| ProbeName      | Target position of probe on CpG island microarray | TargetID            | GeneSymbol | CpG island Description | Ratio of relative methylation (TiO2-NP/Vehicle) | Sham group                       |                     |                     | TiO <sub>2</sub> -H group        |                     |                     |
|----------------|---------------------------------------------------|---------------------|------------|------------------------|-------------------------------------------------|----------------------------------|---------------------|---------------------|----------------------------------|---------------------|---------------------|
|                |                                                   |                     |            |                        |                                                 | Relative methylation (Cy-5/Cy-3) | Cy-3 signal (Input) | Cy-5 signal (MeDIP) | Relative methylation (Cy-5/Cy-3) | Cy-3 signal (Input) | Cy-5 signal (MeDIP) |
| A_68_P32691812 | chrX:135449017-135449063                          | NM_013724:72        | Nrk        | INSIDE                 | 0.094                                           | 3.143                            | 1481.01             | 4654.61             | 0.294                            | 570.56              | 167.80              |
| A_68_P31161346 | chr17:35998590-35998640                           | NM_134122:352       | Nrm        | INSIDE                 | 0.415                                           | 1.623                            | 3958.59             | 6423.63             | 0.673                            | 2470.63             | 1663.50             |
| A_68_P28950724 | chr13:36818604-36818663                           | NM_153529:7690      | Nrn1       | INSIDE                 | 0.182                                           | 0.540                            | 1648.09             | 890.21              | 0.098                            | 1233.86             | 121.18              |
| A_68_P26268769 | chr8:130881368-130881412                          | NM_008737:-1582     | Nrp1       | PROMOTER               | 0.381                                           | 0.592                            | 1392.25             | 824.88              | 0.225                            | 1178.98             | 265.85              |
| A_68_P26268777 | chr8:130882335-130882384                          | NM_008737:-613      | Nrp1       | PROMOTER               | 0.253                                           | 0.610                            | 995.81              | 607.04              | 0.154                            | 779.14              | 119.94              |
| A_68_P26268778 | chr8:130882433-130882477                          | NM_008737:-518      | Nrp1       | PROMOTER               | 0.481                                           | 0.712                            | 1356.25             | 965.21              | 0.342                            | 1017.05             | 347.82              |
| A_68_P26268784 | chr8:130883235-130883284                          | NM_008737:287       | Nrp1       | INSIDE                 | 0.153                                           | 0.498                            | 2154.51             | 1073.27             | 0.076                            | 1558.54             | 118.92              |
| A_68_P26268785 | chr8:130883347-130883403                          | NM_008737:402       | Nrp1       | INSIDE                 | 0.250                                           | 0.516                            | 1285.24             | 663.39              | 0.129                            | 895.01              | 115.67              |
| A_68_P31258135 | chr17:56890739-56890783                           | NM_008738:6193      | Nrtn       | INSIDE                 | 0.301                                           | 1.430                            | 1022.35             | 1462.25             | 0.430                            | 808.62              | 347.81              |
| A_68_P31934664 | chr19:6428736-6428780                             | NM_001205234:10021  | Nrxn2      | INSIDE                 | 0.328                                           | 0.603                            | 1095.93             | 660.62              | 0.198                            | 815.98              | 161.49              |
| A_68_P31934666 | chr19:6428995-6429039                             | NM_001205234:10279  | Nrxn2      | INSIDE                 | 0.594                                           | 2.293                            | 5391.29             | 12362.88            | 1.363                            | 3511.12             | 4786.12             |
| A_68_P31935004 | chr19:6481505-6481549                             | NM_001205234:62789  | Nrxn2      | INSIDE                 | 0.655                                           | 2.154                            | 3802.31             | 8188.49             | 1.411                            | 2531.56             | 3573.21             |
| A_68_P31935408 | chr19:6531356-6531400                             | NM_001205234:112641 | Nrxn2      | INSIDE                 | 0.668                                           | 0.583                            | 1603.83             | 935.12              | 0.389                            | 1334.63             | 519.47              |
| A_68_P21744134 | chr2:151319923-151319967                          | NM_198326:-99       | Nsf11c     | PROMOTER               | 0.660                                           | 0.649                            | 897.33              | 582.70              | 0.428                            | 697.84              | 298.98              |
| A_68_P23617866 | chr5:38550212-38550259                            | NM_010942:471       | Nsg1       | INSIDE                 | 0.297                                           | 0.618                            | 826.48              | 510.65              | 0.183                            | 640.65              | 117.53              |
| A_68_P23617870 | chr5:38550639-38550683                            | NM_010942:46        | Nsg1       | INSIDE                 | 0.195                                           | 0.577                            | 1256.40             | 725.24              | 0.112                            | 1185.89             | 133.22              |
| A_68_P22705746 | chr4:6380618-6380662                              | NM_010945:778       | Nsmaf      | INSIDE                 | 0.291                                           | 0.598                            | 1501.04             | 897.31              | 0.174                            | 1239.58             | 215.96              |
| A_68_P22705747 | chr4:6380739-6380783                              | NM_010945:658       | Nsmaf      | INSIDE                 | 0.405                                           | 0.415                            | 1617.03             | 671.38              | 0.168                            | 1348.70             | 226.72              |
| A_68_P25494915 | chr7:132634916-132634960                          | NM_026330:118       | Nsmce1     | INSIDE                 | 0.538                                           | 0.678                            | 2798.73             | 1897.41             | 0.365                            | 2099.17             | 765.53              |
| A_68_P25494916 | chr7:132635012-132635056                          | NM_026330:22        | Nsmce1     | INSIDE                 | 0.201                                           | 0.540                            | 2314.21             | 1249.49             | 0.109                            | 1645.48             | 178.56              |
| A_68_P25522280 | chr7:137690501-137690545                          | NM_001162855:373    | Nsmce4a    | INSIDE                 | 0.503                                           | 0.564                            | 2401.25             | 1353.98             | 0.284                            | 1791.02             | 508.46              |
| A_68_P23760679 | chr5:66651534-66651578                            | NM_027602:193       | Nsun7      | INSIDE                 | 0.211                                           | 2.423                            | 3500.23             | 8481.48             | 0.510                            | 2272.03             | 1159.24             |
| A_68_P23261316 | chr4:122878552-122878598                          | NM_001085502:-221   | Nt5c1a     | PROMOTER               | 0.212                                           | 0.667                            | 1290.84             | 860.65              | 0.141                            | 883.84              | 125.03              |
| A_68_P32147202 | chr19:47090004-47090048                           | NM_001164363:-347   | Nt5c2      | PROMOTER               | 0.387                                           | 0.484                            | 1367.29             | 661.09              | 0.187                            | 1103.59             | 206.66              |
| A_68_P32147204 | chr19:47090203-47090247                           | NM_001164363:-545   | Nt5c2      | PROMOTER               | 0.187                                           | 0.710                            | 1808.50             | 1284.59             | 0.133                            | 1471.62             | 195.03              |
| A_68_P28068130 | chr11:100302472-100302516                         | NM_026561:-91       | Nt5c3l     | DIVERGENT_PROMOTER     | 0.300                                           | 0.677                            | 1646.00             | 1113.66             | 0.203                            | 1214.32             | 246.45              |
| A_68_P27056941 | chr10:34138297-34138341                           | NM_176968:16        | Nt5dc1     | INSIDE                 | 0.139                                           | 1.588                            | 5026.10             | 7980.69             | 0.220                            | 3697.00             | 813.78              |
| A_68_P30559115 | chr16:13819208-13819252                           | NM_010946:-139      | Ntan1      | PROMOTER               | 0.448                                           | 0.613                            | 2042.89             | 1252.94             | 0.275                            | 1488.62             | 409.32              |
| A_68_P25092989 | chr7:52671296-52671340                            | NM_198190:2254      | Ntf5       | INSIDE                 | 0.259                                           | 1.361                            | 2359.88             | 3212.89             | 0.352                            | 1741.58             | 612.93              |
| A_68_P31098617 | chr17:24769589-24769637                           | NM_008743:-14       | Nthl1      | DIVERGENT_PROMOTER     | 0.259                                           | 0.438                            | 1343.19             | 587.77              | 0.113                            | 1033.40             | 116.93              |
| A_68_P26388504 | chr9:29219516-29219560                            | NM_172290:551176    | Ntm        | INSIDE                 | 0.534                                           | 0.666                            | 1955.15             | 1303.07             | 0.356                            | 1485.82             | 528.84              |
| A_68_P27889080 | chr11:68198460-68198504                           | NM_008744:1846      | Ntn1       | INSIDE                 | 0.389                                           | 0.596                            | 1947.38             | 1160.66             | 0.232                            | 1552.36             | 359.66              |
| A_68_P27889095 | chr11:68200015-68200060                           | NM_008744:291       | Ntn1       | INSIDE                 | 0.139                                           | 0.675                            | 1757.64             | 1186.31             | 0.094                            | 1243.46             | 116.80              |
| A_68_P22422573 | chr3:109946012-109946056                          | NM_001163348:356    | Ntng1      | INSIDE                 | 0.251                                           | 0.544                            | 1642.08             | 893.53              | 0.137                            | 1231.93             | 168.45              |
| A_68_P22422579 | chr3:109946712-109946764                          | NM_001163348:-348   | Ntng1      | PROMOTER               | 0.292                                           | 0.564                            | 929.84              | 524.30              | 0.164                            | 728.06              | 119.75              |
| A_68_P22422580 | chr3:109946888-109946938                          | NM_001163348:-522   | Ntng1      | PROMOTER               | 0.338                                           | 0.560                            | 2088.91             | 1170.50             | 0.189                            | 1590.07             | 301.02              |
| A_68_P21095672 | chr2:29050439-29050483                            | NM_133500:53100     | Ntng2      | INSIDE                 | 0.645                                           | 0.730                            | 2161.13             | 1577.79             | 0.471                            | 1866.60             | 878.51              |
| A_68_P21096074 | chr2:29107607-29107664                            | NM_133500:-4075     | Ntng2      | PROMOTER               | 0.158                                           | 1.553                            | 2861.42             | 4444.43             | 0.245                            | 1933.41             | 473.66              |
| A_68_P21096076 | chr2:29107825-29107869                            | NM_133500:-4286     | Ntng2      | PROMOTER               | 0.297                                           | 0.598                            | 1790.03             | 1071.17             | 0.178                            | 1394.41             | 247.93              |
| A_68_P22310058 | chr3:87598739-87598783                            | NM_001033124:324    | Ntrk1      | INSIDE                 | 0.636                                           | 0.691                            | 2699.07             | 1863.82             | 0.439                            | 2215.10             | 972.96              |
| A_68_P29075345 | chr13:58907821-58907865                           | NM_008745:-114      | Ntrk2      | PROMOTER               | 0.391                                           | 0.692                            | 1892.71             | 1310.54             | 0.271                            | 1464.42             | 396.74              |
| A_68_P29075352 | chr13:58908396-58908440                           | NM_001025074:-775   | Ntrk2      | PROMOTER               | 0.489                                           | 0.659                            | 2536.05             | 1670.02             | 0.322                            | 1999.16             | 644.05              |
| A_68_P25256092 | chr7:85723225-85723269                            | NM_008746:-522      | Ntrk3      | PROMOTER               | 0.438                                           | 0.647                            | 1011.10             | 654.18              | 0.283                            | 766.67              | 217.27              |
| A_68_P25256093 | chr7:85723547-85723591                            | NM_008746:-844      | Ntrk3      | PROMOTER               | 0.261                                           | 0.650                            | 1106.75             | 719.75              | 0.169                            | 839.19              | 142.23              |

| ProbeName      | Target position of probe on CpG island microarray | TargetID          | GeneSymbol  | CpG island Description | Ratio of relative methylation (TiO2-NP/Vehicle) | Sham group                       |                     |                     | TiO <sub>2</sub> -H group        |                     |                     |
|----------------|---------------------------------------------------|-------------------|-------------|------------------------|-------------------------------------------------|----------------------------------|---------------------|---------------------|----------------------------------|---------------------|---------------------|
|                |                                                   |                   |             |                        |                                                 | Relative methylation (Cy-5/Cy-3) | Cy-3 signal (Input) | Cy-5 signal (MeDIP) | Relative methylation (Cy-5/Cy-3) | Cy-3 signal (Input) | Cy-5 signal (MeDIP) |
| A_68_P25256094 | chr7:85723616-85723660                            | NM_008746:-914    | Ntrk3       | PROMOTER               | 0.208                                           | 0.471                            | 1632.25             | 768.13              | 0.098                            | 1205.76             | 117.77              |
| A_68_P28265956 | chr12:16660397-16660441                           | NM_008747:143     | Ntr2        | INSIDE                 | 0.621                                           | 0.465                            | 1150.11             | 535.29              | 0.289                            | 961.02              | 277.93              |
| A_68_P20620659 | chr1:134213013-134213057                          | NM_001195025:333  | Nuak2       | INSIDE                 | 0.501                                           | 0.617                            | 1276.45             | 786.99              | 0.309                            | 1170.21             | 361.54              |
| A_68_P23543337 | chr5:24191628-24191672                            | NM_016736:18      | Nub1        | INSIDE                 | 0.203                                           | 1.600                            | 4781.80             | 7649.06             | 0.324                            | 3187.57             | 1034.03             |
| A_68_P31100079 | chr17:25023157-25023201                           | NM_011956:117     | Nubp2       | INSIDE                 | 0.426                                           | 0.469                            | 5167.57             | 2423.85             | 0.200                            | 3511.20             | 701.20              |
| A_68_P25093530 | chr7:52765419-52765466                            | NM_001163662:336  | Nucb1       | INSIDE                 | 0.242                                           | 0.652                            | 1067.29             | 695.72              | 0.158                            | 768.33              | 121.05              |
| A_68_P25448400 | chr7:123648290-123648334                          | NM_016773:425     | Nucb2       | INSIDE                 | 0.124                                           | 1.395                            | 4436.86             | 6188.51             | 0.173                            | 2668.75             | 460.58              |
| A_68_P20618261 | chr1:133806870-133806914                          | NM_001145804:-142 | Nucks1      | PROMOTER               | 0.120                                           | 0.645                            | 2518.02             | 1623.65             | 0.077                            | 1776.11             | 136.92              |
| A_68_P20618262 | chr1:133806972-133807021                          | NM_001145804:-38  | Nucks1      | PROMOTER               | 0.059                                           | 0.573                            | 4903.36             | 2808.04             | 0.034                            | 3475.83             | 116.53              |
| A_68_P24140929 | chr5:140808002-140808046                          | NM_008637:149     | Nudt1       | INSIDE                 | 0.265                                           | 1.402                            | 1716.18             | 2405.38             | 0.371                            | 1358.22             | 504.11              |
| A_68_P29718025 | chr14:73924796-73924840                           | NM_172527:23231   | Nudt15      | INSIDE                 | 0.174                                           | 0.663                            | 5473.03             | 3631.03             | 0.115                            | 3869.57             | 445.76              |
| A_68_P30512786 | chr16:4939254-4939298                             | NM_025839:166     | Nudt16l1    | INSIDE                 | 0.194                                           | 0.710                            | 2106.79             | 1495.70             | 0.137                            | 1362.72             | 187.33              |
| A_68_P22350765 | chr3:96512213-96512257                            | NM_001162925:249  | Nudt17      | INSIDE                 | 0.344                                           | 0.488                            | 1912.80             | 934.13              | 0.168                            | 1486.44             | 249.62              |
| A_68_P29702205 | chr14:70977218-70977273                           | NM_153136:-408    | Nudt18      | PROMOTER               | 0.219                                           | 0.494                            | 1447.28             | 714.31              | 0.108                            | 1079.99             | 116.63              |
| A_68_P26075123 | chr8:96560510-96560557                            | NM_026623:406     | Nudt21      | INSIDE                 | 0.289                                           | 0.604                            | 1360.52             | 822.02              | 0.175                            | 1087.56             | 189.83              |
| A_68_P31117522 | chr17:27759599-27759649                           | NM_019837:773     | Nudt3       | INSIDE                 | 0.212                                           | 0.571                            | 1376.47             | 786.56              | 0.121                            | 952.80              | 115.26              |
| A_68_P22063505 | chr3:37318090-37318134                            | NM_153561:400     | Nudt6       | INSIDE                 | 0.446                                           | 0.595                            | 1766.22             | 1050.41             | 0.265                            | 1459.60             | 387.04              |
| A_68_P31920554 | chr19:4000379-4000423                             | NM_025529:-179    | Nudt8       | PROMOTER               | 0.307                                           | 0.519                            | 1609.25             | 834.54              | 0.159                            | 1305.69             | 207.58              |
| A_68_P26242531 | chr8:126472768-126472821                          | NM_172288:371     | Nup133      | INSIDE                 | 0.180                                           | 0.589                            | 2114.34             | 1245.39             | 0.106                            | 1447.79             | 153.73              |
| A_68_P26242536 | chr8:126473255-126473299                          | NM_172288:-111    | Nup133      | PROMOTER               | 0.201                                           | 0.322                            | 2254.66             | 726.10              | 0.065                            | 1823.86             | 117.95              |
| A_68_P26242539 | chr8:126473498-126473548                          | NM_172288:-357    | Nup133      | PROMOTER               | 0.154                                           | 0.579                            | 1680.69             | 973.87              | 0.089                            | 1301.58             | 116.11              |
| A_68_P29009464 | chr13:46822934-46822978                           | NM_175749:262     | Nup153      | INSIDE                 | 0.648                                           | 0.433                            | 1908.64             | 826.99              | 0.281                            | 1480.98             | 416.03              |
| A_68_P21418379 | chr2:90519075-90519128                            | NM_021512:1730    | Nup160      | INSIDE                 | 0.198                                           | 0.639                            | 1306.12             | 834.87              | 0.127                            | 920.60              | 116.71              |
| A_68_P21102303 | chr2:30142233-30142277                            | NM_198304:302     | Nup188      | INSIDE                 | 0.325                                           | 0.431                            | 2753.10             | 1187.89             | 0.140                            | 2026.23             | 284.10              |
| A_68_P24360135 | chr6:35127937-35127981                            | NM_027513:343     | Nup205      | INSIDE                 | 0.634                                           | 0.579                            | 1249.82             | 724.04              | 0.368                            | 1063.37             | 390.85              |
| A_68_P21112482 | chr2:31830089-31830133                            | NM_172268:141     | Nup214      | INSIDE                 | 0.217                                           | 0.462                            | 1430.40             | 660.43              | 0.100                            | 1205.86             | 120.66              |
| A_68_P30397616 | chr15:84753564-84753608                           | NM_016714:-271    | Nup50       | PROMOTER               | 0.177                                           | 0.446                            | 2041.68             | 911.47              | 0.079                            | 1585.46             | 125.19              |
| A_68_P23894274 | chr5:92863985-92864029                            | NM_183392:219     | Nup54       | INSIDE                 | 0.160                                           | 0.580                            | 1668.34             | 968.02              | 0.093                            | 1240.45             | 115.41              |
| A_68_P23894275 | chr5:92864051-92864096                            | NM_183392:152     | Nup54       | INSIDE                 | 0.227                                           | 0.635                            | 5751.09             | 3654.74             | 0.144                            | 4115.74             | 592.88              |
| A_68_P23894277 | chr5:92864276-92864320                            | NM_183392:-73     | Nup54       | PROMOTER               | 0.364                                           | 0.633                            | 1620.81             | 1026.47             | 0.231                            | 1304.06             | 301.01              |
| A_68_P32697227 | chrX:136596984-136597028                          | NM_001081668:101  | Nup62cl     | INSIDE                 | 0.223                                           | 1.655                            | 1194.86             | 1977.34             | 0.370                            | 551.75              | 203.93              |
| A_68_P25089408 | chr7:52071427-52071471                            | NM_001171024:-291 | Nup62-il4i1 | DIVERGENT_PROMOTER     | 0.261                                           | 0.708                            | 1442.12             | 1021.06             | 0.185                            | 1029.63             | 190.19              |
| A_68_P27903590 | chr11:70783209-70783253                           | NM_001083331:234  | Nup88       | INSIDE                 | 0.194                                           | 0.483                            | 1721.41             | 831.37              | 0.093                            | 1290.37             | 120.59              |
| A_68_P27903591 | chr11:70783309-70783353                           | NM_001083331:134  | Nup88       | INSIDE                 | 0.252                                           | 0.561                            | 1888.83             | 1060.44             | 0.142                            | 1364.85             | 193.26              |
| A_68_P26076074 | chr8:96738369-96738413                            | NM_172410:-110    | Nup93       | PROMOTER               | 0.365                                           | 0.640                            | 1151.63             | 737.03              | 0.234                            | 880.41              | 205.75              |
| A_68_P25377673 | chr7:109358261-109358306                          | NM_022979:351     | Nup98       | INSIDE                 | 0.267                                           | 0.374                            | 1583.05             | 591.34              | 0.100                            | 1224.31             | 121.96              |
| A_68_P27137647 | chr10:52137521-52137565                           | NM_030250:190     | Nus1        | INSIDE                 | 0.464                                           | 0.651                            | 5850.61             | 3808.45             | 0.302                            | 4439.83             | 1339.71             |
| A_68_P27137650 | chr10:52137866-52137910                           | NM_030250:536     | Nus1        | INSIDE                 | 0.600                                           | 0.572                            | 1525.12             | 872.76              | 0.343                            | 1337.33             | 459.15              |
| A_68_P31943410 | chr19:8831910-8831954                             | NM_016813:340     | Nxf1        | INSIDE                 | 0.216                                           | 0.419                            | 1761.24             | 738.39              | 0.091                            | 1322.43             | 119.97              |
| A_68_P29031122 | chr13:51266973-51267017                           | NM_029173:601     | Nxn12       | INSIDE                 | 0.232                                           | 0.644                            | 2163.55             | 1392.28             | 0.149                            | 1691.08             | 252.45              |
| A_68_P27536452 | chr10:126971104-126971148                         | NM_183297:489     | Nxph4       | INSIDE                 | 0.045                                           | 1.402                            | 12909.02            | 18098.38            | 0.064                            | 7582.89             | 483.68              |
| A_68_P27536453 | chr10:126971246-126971290                         | NM_183297:347     | Nxph4       | INSIDE                 | 0.444                                           | 0.595                            | 1610.34             | 957.72              | 0.264                            | 1084.93             | 286.51              |
| A_68_P27536461 | chr10:126972343-126972387                         | NM_183297:-749    | Nxph4       | PROMOTER               | 0.183                                           | 0.538                            | 2326.13             | 1251.91             | 0.098                            | 1517.35             | 149.09              |
| A_68_P32099497 | chr19:38171760-38171804                           | NM_181748:214     | O3far1      | INSIDE                 | 0.307                                           | 0.500                            | 1215.27             | 607.68              | 0.153                            | 973.89              | 149.46              |

| ProbeName      | Target position of probe on CpG island microarray | TargetID            | GeneSymbol | CpG island Description | Ratio of relative methylation (TiO2-NP/Vehicle) | Sham group                       |                     |                     | TiO <sub>2</sub> -H group        |                     |                     |
|----------------|---------------------------------------------------|---------------------|------------|------------------------|-------------------------------------------------|----------------------------------|---------------------|---------------------|----------------------------------|---------------------|---------------------|
|                |                                                   |                     |            |                        |                                                 | Relative methylation (Cy-5/Cy-3) | Cy-3 signal (Input) | Cy-5 signal (MeDIP) | Relative methylation (Cy-5/Cy-3) | Cy-3 signal (Input) | Cy-5 signal (MeDIP) |
| A_68_P32099500 | chr19:38172076-38172120                           | NM_181748:530       | O3far1     | INSIDE                 | 0.568                                           | 0.513                            | 2719.67             | 1395.86             | 0.291                            | 2141.75             | 624.03              |
| A_68_P26460519 | chr9:43047271-43047315                            | NM_178644:607       | Oaf        | INSIDE                 | 0.219                                           | 0.536                            | 1851.00             | 991.97              | 0.118                            | 1439.47             | 169.19              |
| A_68_P26460523 | chr9:43047879-43047923                            | NM_178644:-1        | Oaf        | PROMOTER               | 0.188                                           | 0.422                            | 2116.38             | 893.93              | 0.079                            | 1577.08             | 125.36              |
| A_68_P26460524 | chr9:43048046-43048090                            | NM_178644:-169      | Oaf        | PROMOTER               | 0.148                                           | 0.597                            | 2265.97             | 1352.33             | 0.088                            | 1894.99             | 167.05              |
| A_68_P27285693 | chr10:80289215-80289268                           | NM_008753:-159      | Oaz1       | PROMOTER               | 0.341                                           | 0.565                            | 1467.24             | 829.33              | 0.193                            | 1028.09             | 198.41              |
| A_68_P26588950 | chr9:65524268-65524312                            | NM_010952:-64       | Oaz2-ps    | PROMOTER               | 0.650                                           | 0.614                            | 1028.55             | 631.76              | 0.399                            | 831.67              | 331.97              |
| A_68_P20221655 | chr1:51535170-51535214                            | NM_028696:51        | Obfc2a     | INSIDE                 | 0.191                                           | 0.468                            | 1704.65             | 797.87              | 0.090                            | 1345.45             | 120.43              |
| A_68_P20221656 | chr1:51535340-51535384                            | NM_028696:-119      | Obfc2a     | PROMOTER               | 0.410                                           | 0.578                            | 4764.54             | 2752.21             | 0.237                            | 3808.61             | 902.69              |
| A_68_P27541262 | chr10:127846864-127846908                         | NM_027257:-34       | Obfc2b     | DIVERGENT_PROMOTER     | 0.138                                           | 0.649                            | 3690.52             | 2394.30             | 0.090                            | 2625.23             | 235.69              |
| A_68_P27835021 | chr11:58948977-58949031                           | NM_001171512:873    | Obscn      | INSIDE                 | 0.257                                           | 0.532                            | 1261.38             | 670.51              | 0.137                            | 870.24              | 118.93              |
| A_68_P27835027 | chr11:58949650-58949694                           | NM_001171512:205    | Obscn      | INSIDE                 | 0.511                                           | 0.537                            | 1404.96             | 753.92              | 0.274                            | 1265.11             | 346.76              |
| A_68_P20354397 | chr1:75483176-75483220                            | NM_178884:19829     | Obsl1      | INSIDE                 | 0.189                                           | 0.684                            | 1499.12             | 1026.11             | 0.129                            | 938.26              | 121.49              |
| A_68_P20354542 | chr1:75501748-75501792                            | NM_178884:1257      | Obsl1      | INSIDE                 | 0.524                                           | 0.390                            | 2008.01             | 782.44              | 0.204                            | 1542.57             | 314.94              |
| A_68_P20354543 | chr1:75501853-75501897                            | NM_178884:1153      | Obsl1      | INSIDE                 | 0.379                                           | 0.484                            | 1584.19             | 766.92              | 0.183                            | 1259.54             | 231.06              |
| A_68_P20354544 | chr1:75501965-75502010                            | NM_178884:1040      | Obsl1      | INSIDE                 | 0.082                                           | 0.567                            | 3667.31             | 2080.00             | 0.046                            | 2724.69             | 126.61              |
| A_68_P20354547 | chr1:75502266-75502310                            | NM_178884:739       | Obsl1      | INSIDE                 | 0.581                                           | 0.691                            | 1324.77             | 915.62              | 0.402                            | 1148.24             | 461.21              |
| A_68_P29269006 | chr13:101321942-101321987                         | NM_008756:489       | Ocln       | INSIDE                 | 0.121                                           | 1.621                            | 1050.20             | 1701.96             | 0.196                            | 752.48              | 147.50              |
| A_68_P29269011 | chr13:101322401-101322445                         | NM_008756:31        | Ocln       | INSIDE                 | 0.194                                           | 0.430                            | 1613.59             | 694.20              | 0.084                            | 1469.64             | 122.93              |
| A_68_P29269014 | chr13:101322735-101322779                         | NM_008756:-303      | Ocln       | PROMOTER               | 0.224                                           | 1.359                            | 5204.64             | 7074.70             | 0.305                            | 3479.69             | 1059.69             |
| A_68_P29269015 | chr13:101322806-101322850                         | NM_008756:-375      | Ocln       | PROMOTER               | 0.068                                           | 1.923                            | 3702.50             | 7119.37             | 0.132                            | 2243.73             | 295.18              |
| A_68_P21100055 | chr2:29745964-29746008                            | NM_001177662:404    | Odf2       | INSIDE                 | 0.201                                           | 0.609                            | 1174.99             | 715.00              | 0.122                            | 987.70              | 120.84              |
| A_68_P21100057 | chr2:29746300-29746344                            | NM_001177662:740    | Odf2       | INSIDE                 | 0.268                                           | 0.593                            | 962.80              | 571.25              | 0.159                            | 767.46              | 122.15              |
| A_68_P22606646 | chr3:144781460-144781506                          | NM_001162538:-70    | Odf2l      | PROMOTER               | 0.544                                           | 0.598                            | 2282.71             | 1365.36             | 0.325                            | 1816.47             | 590.70              |
| A_68_P22606647 | chr3:144781543-144781587                          | NM_025714:1         | Odf2l      | INSIDE                 | 0.431                                           | 0.515                            | 2321.62             | 1194.95             | 0.222                            | 1838.55             | 408.21              |
| A_68_P30424871 | chr15:89208941-89208985                           | NM_001013022:723    | Odf3b      | INSIDE                 | 0.187                                           | 1.450                            | 2442.21             | 3540.10             | 0.271                            | 1608.19             | 435.68              |
| A_68_P30424873 | chr15:89209271-89209315                           | NM_001013022:393    | Odf3b      | INSIDE                 | 0.532                                           | 0.701                            | 5150.98             | 3609.14             | 0.373                            | 3802.05             | 1416.55             |
| A_68_P30424875 | chr15:89209486-89209530                           | NM_001013022:177    | Odf3b      | INSIDE                 | 0.332                                           | 0.576                            | 1115.25             | 642.53              | 0.191                            | 902.01              | 172.46              |
| A_68_P25848475 | chr8:49640835-49640879                            | NM_001145937:119188 | Odz3       | INSIDE                 | 0.393                                           | 0.623                            | 1717.71             | 1069.53             | 0.245                            | 1357.53             | 332.13              |
| A_68_P25848476 | chr8:49641034-49641078                            | NM_001145937:118988 | Odz3       | INSIDE                 | 0.326                                           | 1.385                            | 4524.73             | 6265.24             | 0.452                            | 3103.08             | 1401.44             |
| A_68_P25343523 | chr7:103360337-103360381                          | NM_011858:1212      | Odz4       | INSIDE                 | 0.589                                           | 0.648                            | 1218.86             | 789.75              | 0.382                            | 970.32              | 370.61              |
| A_68_P27567705 | chr11:6191666-6191710                             | NM_010956:89        | Ogdh       | INSIDE                 | 0.312                                           | 0.472                            | 2945.64             | 1389.37             | 0.147                            | 2126.37             | 313.31              |
| A_68_P27567706 | chr11:6191780-6191824                             | NM_010956:203       | Ogdh       | INSIDE                 | 0.321                                           | 0.474                            | 2299.39             | 1088.84             | 0.152                            | 1778.73             | 270.62              |
| A_68_P27567707 | chr11:6191869-6191913                             | NM_010956:291       | Ogdh       | INSIDE                 | 0.124                                           | 0.481                            | 6923.48             | 3326.88             | 0.060                            | 5190.09             | 309.95              |
| A_68_P27567708 | chr11:6192040-6192084                             | NM_010956:463       | Ogdh       | INSIDE                 | 0.464                                           | 0.572                            | 2473.11             | 1415.47             | 0.265                            | 2093.52             | 555.48              |
| A_68_P26075129 | chr8:96561318-96561362                            | NM_00109375:243     | Ogfod1     | INSIDE                 | 0.518                                           | 0.721                            | 2131.22             | 1536.21             | 0.373                            | 1534.30             | 572.41              |
| A_68_P21904887 | chr2:180324446-180324490                          | NM_031373:357       | Ogfr       | INSIDE                 | 0.420                                           | 0.370                            | 1864.70             | 690.24              | 0.155                            | 1417.92             | 220.43              |
| A_68_P20088284 | chr1:23390288-23390332                            | NM_001081079:-296   | Ogfrl1     | PROMOTER               | 0.335                                           | 0.497                            | 1281.57             | 637.48              | 0.167                            | 1031.91             | 171.96              |
| A_68_P24758833 | chr6:113277046-113277100                          | NM_010957:103       | Oggl       | INSIDE                 | 0.060                                           | 1.477                            | 1972.22             | 2912.53             | 0.088                            | 1364.63             | 120.44              |
| A_68_P21089693 | chr2:28061497-28061541                            | NM_001038612:310    | Olfm1      | INSIDE                 | 0.274                                           | 0.276                            | 2136.67             | 589.05              | 0.076                            | 1666.45             | 125.96              |
| A_68_P26343617 | chr9:20530951-20530995                            | NM_173777:1686      | Olfm2      | INSIDE                 | 0.441                                           | 0.539                            | 1137.97             | 613.48              | 0.238                            | 820.60              | 195.07              |
| A_68_P26343619 | chr9:20531260-20531304                            | NM_173777:1376      | Olfm2      | INSIDE                 | 0.179                                           | 0.522                            | 1783.14             | 930.71              | 0.094                            | 1271.45             | 118.88              |
| A_68_P26343622 | chr9:20531703-20531748                            | NM_173777:933       | Olfm2      | INSIDE                 | 0.472                                           | 0.370                            | 2747.40             | 1015.49             | 0.174                            | 2246.34             | 391.89              |
| A_68_P30474567 | chr15:98268138-98268187                           | NM_146457:262       | Olf282     | INSIDE                 | 0.593                                           | 3.048                            | 743.38              | 2265.76             | 1.809                            | 609.24              | 1101.89             |
| A_68_P31167786 | chr17:37334030-37334074                           | NM_001011518:859    | Olf94      | INSIDE                 | 0.504                                           | 0.627                            | 1326.07             | 831.18              | 0.316                            | 1130.14             | 356.97              |

| ProbeName      | Target position of probe on CpG island microarray | TargetID           | GeneSymbol | CpG island Description | Ratio of relative methylation (TiO2-NP/Vehicle) | Sham group                       |                     |                     | TiO <sub>2</sub> -H group        |                     |                     |
|----------------|---------------------------------------------------|--------------------|------------|------------------------|-------------------------------------------------|----------------------------------|---------------------|---------------------|----------------------------------|---------------------|---------------------|
|                |                                                   |                    |            |                        |                                                 | Relative methylation (Cy-5/Cy-3) | Cy-3 signal (Input) | Cy-5 signal (MeDIP) | Relative methylation (Cy-5/Cy-3) | Cy-3 signal (Input) | Cy-5 signal (MeDIP) |
| A_68_P30961940 | chr16:91269862-91269906                           | NM_016968:-129     | Olig1      | PROMOTER               | 0.453                                           | 0.521                            | 1364.64             | 711.16              | 0.236                            | 1158.15             | 273.66              |
| A_68_P30961944 | chr16:91270214-91270258                           | NM_016968:223      | Olig1      | INSIDE                 | 0.472                                           | 0.457                            | 1283.92             | 587.13              | 0.216                            | 1004.69             | 216.65              |
| A_68_P30961955 | chr16:91271343-91271387                           | NM_016968:1351     | Olig1      | INSIDE                 | 0.381                                           | 0.573                            | 2374.04             | 1361.14             | 0.218                            | 1834.52             | 400.26              |
| A_68_P30961642 | chr16:91220360-91220404                           | NM_016967:-5412    | Olig2      | PROMOTER               | 0.236                                           | 0.632                            | 1864.85             | 1177.71             | 0.149                            | 1449.49             | 215.84              |
| A_68_P30961643 | chr16:91220441-91220485                           | NM_016967:-5332    | Olig2      | PROMOTER               | 0.447                                           | 0.632                            | 1232.36             | 778.97              | 0.283                            | 856.94              | 242.19              |
| A_68_P30961690 | chr16:91226016-91226061                           | NM_016967:244      | Olig2      | INSIDE                 | 0.532                                           | 0.696                            | 1090.68             | 758.73              | 0.370                            | 925.55              | 342.54              |
| A_68_P30961691 | chr16:91226111-91226155                           | NM_016967:338      | Olig2      | INSIDE                 | 0.598                                           | 0.611                            | 1189.41             | 726.43              | 0.365                            | 904.05              | 330.23              |
| A_68_P30961694 | chr16:91226413-91226457                           | NM_016967:640      | Olig2      | INSIDE                 | 0.639                                           | 0.545                            | 2814.15             | 1535.09             | 0.349                            | 2091.87             | 729.27              |
| A_68_P30961704 | chr16:91227772-91227816                           | NM_016967:2000     | Olig2      | INSIDE                 | 0.130                                           | 0.577                            | 2070.35             | 1193.89             | 0.075                            | 1565.33             | 117.67              |
| A_68_P26980660 | chr10:19077044-19077088                           | NM_053008:722      | Olig3      | INSIDE                 | 0.335                                           | 0.729                            | 7665.22             | 5584.24             | 0.244                            | 5365.06             | 1310.44             |
| A_68_P26980662 | chr10:19077212-19077256                           | NM_053008:890      | Olig3      | INSIDE                 | 0.204                                           | 0.493                            | 1482.76             | 731.55              | 0.101                            | 1131.98             | 114.07              |
| A_68_P23165462 | chr4:102986330-102986374                          | NM_025909:-98      | Oma1       | PROMOTER               | 0.252                                           | 0.375                            | 1524.11             | 571.70              | 0.094                            | 1250.13             | 117.95              |
| A_68_P23165464 | chr4:102986645-102986689                          | NM_025909:216      | Oma1       | INSIDE                 | 0.479                                           | 0.613                            | 996.25              | 610.96              | 0.294                            | 859.86              | 252.48              |
| A_68_P26640621 | chr9:74709991-74710035                            | NM_008262:285      | Oncut1     | INSIDE                 | 0.117                                           | 0.739                            | 6982.63             | 5156.91             | 0.086                            | 4531.49             | 390.53              |
| A_68_P26640622 | chr9:74710098-74710142                            | NM_008262:393      | Oncut1     | INSIDE                 | 0.568                                           | 0.691                            | 2058.51             | 1423.29             | 0.393                            | 1578.58             | 620.07              |
| A_68_P26640627 | chr9:74710721-74710765                            | NM_008262:1015     | Oncut1     | INSIDE                 | 0.421                                           | 0.493                            | 2826.27             | 1394.05             | 0.208                            | 2042.42             | 424.55              |
| A_68_P26640630 | chr9:74711042-74711086                            | NM_008262:1337     | Oncut1     | INSIDE                 | 0.460                                           | 0.364                            | 1579.97             | 575.84              | 0.167                            | 1299.53             | 217.67              |
| A_68_P26640631 | chr9:74711117-74711161                            | NM_008262:1411     | Oncut1     | INSIDE                 | 0.201                                           | 0.644                            | 1047.88             | 674.85              | 0.129                            | 900.21              | 116.27              |
| A_68_P26640636 | chr9:74711696-74711740                            | NM_008262:1991     | Oncut1     | INSIDE                 | 0.131                                           | 0.727                            | 1690.21             | 1229.19             | 0.095                            | 1204.16             | 114.72              |
| A_68_P31774685 | chr18:64499703-64499747                           | NM_194268:-293     | Oncut2     | PROMOTER               | 0.260                                           | 0.642                            | 2246.19             | 1442.58             | 0.167                            | 1660.70             | 277.03              |
| A_68_P31774689 | chr18:64500435-64500479                           | NM_194268:439      | Oncut2     | INSIDE                 | 0.594                                           | 0.667                            | 3296.23             | 2200.05             | 0.396                            | 2371.46             | 940.06              |
| A_68_P31774691 | chr18:64500742-64500786                           | NM_194268:747      | Oncut2     | INSIDE                 | 0.304                                           | 0.612                            | 2694.80             | 1648.87             | 0.186                            | 1986.83             | 369.33              |
| A_68_P27283558 | chr10:79957724-79957768                           | NM_139226:96       | Oncut3     | INSIDE                 | 0.241                                           | 0.669                            | 1296.30             | 867.20              | 0.161                            | 1054.45             | 169.95              |
| A_68_P27283560 | chr10:79958022-79958066                           | NM_139226:394      | Oncut3     | INSIDE                 | 0.395                                           | 0.559                            | 2970.49             | 1661.40             | 0.221                            | 2195.37             | 484.90              |
| A_68_P26381828 | chr9:28211224-28211268                            | NM_177906:612393   | Opm1       | INSIDE                 | 0.312                                           | 0.621                            | 1967.48             | 1221.50             | 0.194                            | 1602.77             | 310.66              |
| A_68_P32552413 | chrX:96086058-96086102                            | NM_052976:244      | Ophn1      | INSIDE                 | 0.226                                           | 1.785                            | 1041.69             | 1858.89             | 0.403                            | 475.40              | 191.68              |
| A_68_P32552414 | chrX:96086168-96086212                            | NM_052976:134      | Ophn1      | INSIDE                 | 0.195                                           | 1.373                            | 1448.29             | 1988.71             | 0.268                            | 619.69              | 166.07              |
| A_68_P20849640 | chr1:177622720-177622764                          | NM_010098:-21      | Opr3       | DIVERGENT_PROMOTER     | 0.360                                           | 0.638                            | 877.37              | 559.53              | 0.230                            | 784.04              | 180.03              |
| A_68_P23310402 | chr4:131700231-131700275                          | NM_013622:149      | Oprd1      | INSIDE                 | 0.463                                           | 0.397                            | 2616.83             | 1037.78             | 0.183                            | 2323.33             | 426.26              |
| A_68_P25507194 | chr7:134913194-134913238                          | NM_198424:-112     | Orai3      | PROMOTER               | 0.301                                           | 0.468                            | 1119.03             | 523.95              | 0.141                            | 870.90              | 122.76              |
| A_68_P25507195 | chr7:134913265-134913309                          | NM_198424:-42      | Orai3      | PROMOTER               | 0.296                                           | 0.416                            | 2043.31             | 849.01              | 0.123                            | 1541.67             | 189.67              |
| A_68_P25507196 | chr7:134913351-134913395                          | NM_198424:44       | Orai3      | INSIDE                 | 0.632                                           | 0.601                            | 964.23              | 579.78              | 0.380                            | 772.09              | 293.24              |
| A_68_P25507198 | chr7:134913587-134913631                          | NM_198424:280      | Orai3      | INSIDE                 | 0.390                                           | 0.574                            | 1146.27             | 658.43              | 0.224                            | 942.27              | 210.99              |
| A_68_P20259229 | chr1:58561716-58561760                            | NM_001025378:-3478 | Orc2       | PROMOTER               | 0.488                                           | 0.613                            | 1220.41             | 748.30              | 0.299                            | 1036.45             | 310.21              |
| A_68_P21199928 | chr2:48804507-48804551                            | NR_033442:259      | Orc4       | INSIDE                 | 0.319                                           | 0.641                            | 1113.59             | 713.64              | 0.204                            | 871.92              | 178.04              |
| A_68_P21199929 | chr2:48804619-48804663                            | NR_033442:147      | Orc4       | INSIDE                 | 0.509                                           | 0.697                            | 1869.92             | 1302.45             | 0.354                            | 1442.42             | 511.04              |
| A_68_P26024230 | chr8:87823989-87824033                            | NM_001163791:480   | Orc6       | INSIDE                 | 0.577                                           | 0.591                            | 1130.55             | 668.43              | 0.341                            | 913.64              | 311.66              |
| A_68_P20231215 | chr1:53354231-53354281                            | NM_145517:318      | Ormd11     | INSIDE                 | 0.406                                           | 0.534                            | 1129.37             | 603.42              | 0.217                            | 980.16              | 212.39              |
| A_68_P28057359 | chr11:98448749-98448807                           | NM_025661:-219     | Ormd13     | PROMOTER               | 0.272                                           | 0.380                            | 1387.33             | 527.27              | 0.104                            | 1146.88             | 118.76              |
| A_68_P27534166 | chr10:126558114-126558159                         | NM_001171026:80    | Os9        | INSIDE                 | 0.101                                           | 1.364                            | 3748.51             | 5114.02             | 0.138                            | 2553.80             | 353.06              |
| A_68_P31958766 | chr19:12040692-12040739                           | NM_001033174:382   | Ospb       | INSIDE                 | 0.210                                           | 0.549                            | 1221.86             | 1109.81             | 0.115                            | 1485.17             | 171.21              |
| A_68_P27553885 | chr11:3661656-3661712                             | NM_152818:102222   | Ospb2      | INSIDE                 | 0.275                                           | 0.462                            | 1229.09             | 567.60              | 0.127                            | 985.74              | 125.03              |
| A_68_P30656618 | chr16:33185004-33185048                           | NM_176840:-130     | Osbpl11    | PROMOTER               | 0.240                                           | 0.654                            | 1195.62             | 782.21              | 0.157                            | 877.80              | 137.67              |
| A_68_P24438209 | chr6:50405431-50405477                            | NM_001163645:715   | Osbpl3     | INSIDE                 | 0.275                                           | 0.562                            | 1096.61             | 616.10              | 0.155                            | 803.08              | 124.16              |

| ProbeName      | Target position of probe on CpG island microarray | TargetID          | GeneSymbol | CpG island Description | Ratio of relative methylation (TiO2-NP/Vehicle) | Sham group                       |                     |                     | TiO <sub>2</sub> -H group        |                     |                     |
|----------------|---------------------------------------------------|-------------------|------------|------------------------|-------------------------------------------------|----------------------------------|---------------------|---------------------|----------------------------------|---------------------|---------------------|
|                |                                                   |                   |            |                        |                                                 | Relative methylation (Cy-5/Cy-3) | Cy-3 signal (Input) | Cy-5 signal (MeDIP) | Relative methylation (Cy-5/Cy-3) | Cy-3 signal (Input) | Cy-5 signal (MeDIP) |
| A_68_P24438215 | chr6:50406155-50406199                            | NM_001163645:-7   | Osbpl3     | PROMOTER               | 0.198                                           | 0.635                            | 2993.58             | 1901.56             | 0.126                            | 2327.92             | 293.40              |
| A_68_P21350014 | chr2:76244191-76244236                            | NM_145525:-381    | Osbpl6     | PROMOTER               | 0.386                                           | 0.500                            | 1498.18             | 748.41              | 0.193                            | 1241.20             | 239.14              |
| A_68_P21350016 | chr2:76244453-76244497                            | NM_145525:-120    | Osbpl6     | PROMOTER               | 0.328                                           | 0.405                            | 1936.43             | 783.94              | 0.133                            | 1603.37             | 213.03              |
| A_68_P21350022 | chr2:76245198-76245242                            | NM_145525:626     | Osbpl6     | INSIDE                 | 0.303                                           | 0.669                            | 3267.75             | 2185.75             | 0.202                            | 2481.34             | 502.37              |
| A_68_P21350023 | chr2:76245283-76245327                            | NM_145525:710     | Osbpl6     | INSIDE                 | 0.167                                           | 0.389                            | 2506.16             | 976.01              | 0.065                            | 2061.98             | 133.94              |
| A_68_P23199842 | chr4:108874395-108874439                          | NM_133885:461     | Osbpl9     | INSIDE                 | 0.295                                           | 0.672                            | 3598.78             | 2417.08             | 0.198                            | 2579.37             | 511.68              |
| A_68_P23277932 | chr4:125735548-125735592                          | NM_172701:-238    | Osep1      | PROMOTER               | 0.117                                           | 0.700                            | 2061.16             | 1443.65             | 0.082                            | 1485.22             | 122.08              |
| A_68_P23277936 | chr4:125736057-125736104                          | NM_172701:272     | Osep1      | INSIDE                 | 0.157                                           | 2.357                            | 6203.43             | 14621.64            | 0.370                            | 4070.21             | 1506.50             |
| A_68_P22752865 | chr4:15941230-15941274                            | NM_145950:-228    | Osgin2     | PROMOTER               | 0.220                                           | 0.591                            | 1076.26             | 635.82              | 0.130                            | 910.26              | 118.49              |
| A_68_P30132589 | chr15:35223344-35223388                           | NM_054049:-2500   | Osr2       | PROMOTER               | 0.196                                           | 0.499                            | 1353.64             | 675.98              | 0.098                            | 1179.00             | 115.20              |
| A_68_P30132611 | chr15:35225684-35225737                           | NM_054049:-156    | Osr2       | PROMOTER               | 0.318                                           | 0.636                            | 811.22              | 516.13              | 0.202                            | 588.59              | 118.99              |
| A_68_P30132613 | chr15:35225986-35226030                           | NM_054049:142     | Osr2       | INSIDE                 | 0.625                                           | 0.547                            | 1390.27             | 760.71              | 0.342                            | 1015.68             | 347.19              |
| A_68_P23575370 | chr5:31209922-31209966                            | NM_001134692:151  | Ost4       | INSIDE                 | 0.179                                           | 0.473                            | 4382.49             | 2073.94             | 0.085                            | 2858.10             | 241.87              |
| A_68_P23618576 | chr5:38668524-38668568                            | NM_172709:-96     | Otop1      | PROMOTER               | 0.240                                           | 0.573                            | 2753.29             | 1577.43             | 0.137                            | 2031.58             | 279.02              |
| A_68_P23618580 | chr5:38668967-38669011                            | NM_172709:346     | Otop1      | INSIDE                 | 0.285                                           | 0.445                            | 2069.17             | 921.27              | 0.127                            | 1547.19             | 196.57              |
| A_68_P28152867 | chr11:115195826-115195870                         | NM_027132:-199    | Otop3      | PROMOTER               | 0.124                                           | 0.539                            | 2165.40             | 1167.89             | 0.067                            | 1730.15             | 115.63              |
| A_68_P28152870 | chr11:115196117-115196161                         | NM_027132:91      | Otop3      | INSIDE                 | 0.334                                           | 0.530                            | 1083.19             | 574.39              | 0.177                            | 850.05              | 150.77              |
| A_68_P29237525 | chr13:95645453-95645497                           | NM_011021:-107    | Otp        | PROMOTER               | 0.499                                           | 0.567                            | 1406.86             | 797.81              | 0.283                            | 1267.55             | 358.50              |
| A_68_P29237543 | chr13:95647408-95647452                           | NM_011021:1849    | Otp        | INSIDE                 | 0.152                                           | 0.566                            | 1800.61             | 1019.69             | 0.086                            | 1393.42             | 120.19              |
| A_68_P29237593 | chr13:95652973-95653017                           | NM_011021:7413    | Otp        | INSIDE                 | 0.492                                           | 0.526                            | 1211.10             | 636.50              | 0.259                            | 1074.15             | 277.83              |
| A_68_P29237603 | chr13:95654247-95654300                           | NM_011021:8692    | Otp        | DOWNSTREAM             | 0.182                                           | 0.589                            | 1535.76             | 904.01              | 0.107                            | 1129.08             | 121.13              |
| A_68_P21046080 | chr2:19580505-19580552                            | NM_027715:840     | Otud1      | INSIDE                 | 0.093                                           | 1.398                            | 1215.23             | 1698.91             | 0.130                            | 1014.23             | 131.51              |
| A_68_P25995582 | chr8:82163121-82163165                            | NM_001081164:-432 | Otud4      | PROMOTER               | 0.176                                           | 0.474                            | 2162.96             | 1025.66             | 0.084                            | 1395.84             | 116.61              |
| A_68_P25171969 | chr7:70590173-70590217                            | NM_130880:537     | Otud7a     | INSIDE                 | 0.283                                           | 0.433                            | 1666.98             | 721.11              | 0.123                            | 1482.49             | 181.72              |
| A_68_P25173477 | chr7:70902398-70902442                            | NM_130880:312763  | Otud7a     | INSIDE                 | 0.326                                           | 0.460                            | 1275.32             | 586.99              | 0.150                            | 1055.58             | 158.56              |
| A_68_P22347475 | chr3:95908828-95908872                            | NM_001025613:401  | Otud7b     | INSIDE                 | 0.237                                           | 0.639                            | 4257.97             | 2719.83             | 0.151                            | 2976.07             | 449.84              |
| A_68_P27638836 | chr11:21893026-21893070                           | NM_011023:8606    | Otx1       | DOWNSTREAM             | 0.512                                           | 0.605                            | 1749.74             | 1058.92             | 0.310                            | 1436.46             | 444.96              |
| A_68_P27638868 | chr11:21896875-21896919                           | NM_011023:4758    | Otx1       | INSIDE                 | 0.578                                           | 0.602                            | 908.17              | 547.01              | 0.348                            | 724.67              | 252.19              |
| A_68_P27638869 | chr11:21896943-21896987                           | NM_011023:4690    | Otx1       | INSIDE                 | 0.268                                           | 0.539                            | 1447.03             | 779.37              | 0.144                            | 1141.53             | 164.71              |
| A_68_P27638907 | chr11:21901433-21901477                           | NM_011023:200     | Otx1       | INSIDE                 | 0.318                                           | 0.392                            | 1595.62             | 626.26              | 0.125                            | 1330.84             | 166.15              |
| A_68_P27638910 | chr11:21901664-21901708                           | NM_011023:-32     | Otx1       | PROMOTER               | 0.376                                           | 0.456                            | 1923.97             | 876.51              | 0.171                            | 1427.76             | 244.86              |
| A_68_P29589360 | chr14:49282109-49282153                           | NM_144841:417     | Otx2       | INSIDE                 | 0.520                                           | 0.524                            | 1009.66             | 528.59              | 0.272                            | 850.24              | 231.39              |
| A_68_P29589383 | chr14:49284720-49284764                           | NM_144841:-2195   | Otx2       | DIVERGENT_PROMOTER     | 0.311                                           | 0.452                            | 2371.68             | 1071.39             | 0.141                            | 1728.89             | 243.22              |
| A_68_P29589384 | chr14:49284797-49284844                           | NM_144841:-2273   | Otx2       | DIVERGENT_PROMOTER     | 0.212                                           | 0.442                            | 1758.34             | 776.68              | 0.094                            | 1301.11             | 121.78              |
| A_68_P27924663 | chr11:74992086-74992130                           | NM_027136:202     | Ovca2      | INSIDE                 | 0.374                                           | 0.551                            | 1536.71             | 847.08              | 0.206                            | 1192.92             | 246.00              |
| A_68_P31929450 | chr19:5560018-5560062                             | NM_019935:535     | Ovol1      | INSIDE                 | 0.365                                           | 0.507                            | 2049.44             | 1040.05             | 0.185                            | 1613.64             | 299.18              |
| A_68_P21706642 | chr2:144156624-144156668                          | NM_152947:452     | Ovol2      | INSIDE                 | 0.659                                           | 0.463                            | 1783.17             | 826.18              | 0.305                            | 1626.83             | 496.36              |
| A_68_P21706649 | chr2:144157501-144157545                          | NM_152947:-424    | Ovol2      | PROMOTER               | 0.481                                           | 0.484                            | 1533.54             | 742.41              | 0.233                            | 1176.65             | 273.94              |
| A_68_P30165307 | chr15:41278629-41278673                           | NM_001130166:-377 | Oxr1       | PROMOTER               | 0.181                                           | 0.506                            | 1656.22             | 838.61              | 0.092                            | 1344.99             | 123.31              |
| A_68_P24754179 | chr6:112439818-112439862                          | NM_001081147:-38  | Oxtr       | PROMOTER               | 0.243                                           | 0.504                            | 1737.96             | 875.89              | 0.122                            | 1551.07             | 189.66              |
| A_68_P24051803 | chr5:123158016-123158060                          | NM_011026:473     | P2rx4      | INSIDE                 | 0.469                                           | 0.538                            | 1178.68             | 634.53              | 0.252                            | 925.97              | 233.59              |
| A_68_P22180929 | chr3:60807059-60807103                            | NM_008772:364     | P2ry1      | INSIDE                 | 0.384                                           | 0.717                            | 2585.02             | 1852.22             | 0.275                            | 2083.51             | 573.97              |
| A_68_P25370974 | chr7:108160323-108160367                          | NM_008773:161     | P2ry2      | INSIDE                 | 0.381                                           | 0.573                            | 1520.90             | 870.99              | 0.218                            | 1226.47             | 267.58              |
| A_68_P25370975 | chr7:108160402-108160446                          | NM_008773:81      | P2ry2      | INSIDE                 | 0.342                                           | 0.538                            | 2527.30             | 1359.55             | 0.184                            | 2030.92             | 373.19              |



| ProbeName      | Target position of probe on CpG island microarray | TargetID          | GeneSymbol | CpG island Description | Ratio of relative methylation (TiO2-NP/Vehicle) | Sham group                       |                     |                     | TiO <sub>2</sub> -H group        |                     |                     |
|----------------|---------------------------------------------------|-------------------|------------|------------------------|-------------------------------------------------|----------------------------------|---------------------|---------------------|----------------------------------|---------------------|---------------------|
|                |                                                   |                   |            |                        |                                                 | Relative methylation (Cy-5/Cy-3) | Cy-3 signal (Input) | Cy-5 signal (MeDIP) | Relative methylation (Cy-5/Cy-3) | Cy-3 signal (Input) | Cy-5 signal (MeDIP) |
| A_68_P28185372 | chr11:120433823-120433867                         | NM_011032:406     | P4hb       | INSIDE                 | 0.644                                           | 0.651                            | 1657.79             | 1079.68             | 0.420                            | 1330.17             | 558.10              |
| A_68_P28185376 | chr11:120434174-120434218                         | NM_011032:54      | P4hb       | INSIDE                 | 0.401                                           | 0.405                            | 1978.78             | 800.88              | 0.162                            | 1637.81             | 265.81              |
| A_68_P27542070 | chr10:128002461-128002505                         | NM_011119:508     | Pa2g4      | INSIDE                 | 0.213                                           | 0.622                            | 1273.81             | 792.64              | 0.133                            | 907.46              | 120.41              |
| A_68_P27542071 | chr10:128002533-128002577                         | NM_011119:436     | Pa2g4      | INSIDE                 | 0.137                                           | 0.727                            | 5194.48             | 3777.12             | 0.100                            | 3678.94             | 366.69              |
| A_68_P30139524 | chr15:36538383-36538427                           | NM_008774:324     | Pabpc1     | INSIDE                 | 0.153                                           | 0.710                            | 8352.49             | 5929.71             | 0.109                            | 5975.04             | 650.28              |
| A_68_P31117691 | chr17:27792800-27792847                           | NM_011861:197     | Pacsin1    | INSIDE                 | 0.097                                           | 1.781                            | 2537.19             | 4517.62             | 0.173                            | 1782.84             | 309.16              |
| A_68_P31117836 | chr17:27822046-27822090                           | NM_178365:-130    | Pacsin1    | PROMOTER               | 0.366                                           | 0.466                            | 1736.60             | 809.51              | 0.171                            | 1241.91             | 212.04              |
| A_68_P21421554 | chr2:91097131-91097175                            | NM_028733:-333    | Pacsin3    | PROMOTER               | 0.115                                           | 0.629                            | 2507.47             | 1577.11             | 0.072                            | 1691.59             | 122.47              |
| A_68_P23360936 | chr4:140462092-140462151                          | NM_008812:-153    | Padi2      | PROMOTER               | 0.148                                           | 1.833                            | 508.54              | 932.20              | 0.270                            | 430.89              | 116.52              |
| A_68_P25021608 | chr7:29178020-29178064                            | NM_019458:28      | Paf1       | INSIDE                 | 0.485                                           | 0.602                            | 1810.55             | 1090.50             | 0.292                            | 1319.52             | 385.55              |
| A_68_P25009541 | chr7:26082496-26082540                            | NM_008776:456     | Pafah1b3   | INSIDE                 | 0.400                                           | 0.438                            | 1706.65             | 746.98              | 0.175                            | 1461.72             | 256.05              |
| A_68_P25009542 | chr7:26082633-26082677                            | NM_008776:320     | Pafah1b3   | INSIDE                 | 0.191                                           | 0.620                            | 1313.21             | 813.87              | 0.118                            | 1054.27             | 124.82              |
| A_68_P23819018 | chr5:77380092-77380136                            | NM_025939:-321    | Paics      | PROMOTER               | 0.610                                           | 0.694                            | 2442.61             | 1695.65             | 0.423                            | 1747.29             | 739.64              |
| A_68_P23819019 | chr5:77380180-77380224                            | NM_025939:-233    | Paics      | PROMOTER               | 0.253                                           | 0.599                            | 2057.85             | 1231.88             | 0.152                            | 1576.69             | 238.91              |
| A_68_P31619153 | chr18:35758686-35758732                           | NM_026420:388     | Paip2      | INSIDE                 | 0.272                                           | 0.448                            | 1311.64             | 587.93              | 0.122                            | 989.62              | 120.73              |
| A_68_P24595788 | chr6:83781684-83781728                            | NM_146169:29      | Paip2b     | INSIDE                 | 0.319                                           | 0.442                            | 1996.92             | 883.24              | 0.141                            | 1585.98             | 223.94              |
| A_68_P24595789 | chr6:83781804-83781857                            | NM_146169:-95     | Paip2b     | PROMOTER               | 0.177                                           | 0.494                            | 1921.04             | 948.76              | 0.087                            | 1366.72             | 119.32              |
| A_68_P21565424 | chr2:118503074-118503118                          | NM_001145854:115  | Pak6       | INSIDE                 | 0.549                                           | 0.425                            | 1545.02             | 657.06              | 0.233                            | 1355.55             | 316.31              |
| A_68_P26017700 | chr8:86550149-86550193                            | NM_028877:4798    | Paln3      | INSIDE                 | 0.392                                           | 1.362                            | 4053.05             | 5519.11             | 0.533                            | 2798.18             | 1491.77             |
| A_68_P20474865 | chr1:99991588-99991632                            | NM_013626:599     | Pam        | INSIDE                 | 0.237                                           | 0.516                            | 2373.73             | 1225.88             | 0.123                            | 1819.31             | 222.91              |
| A_68_P32082682 | chr19:34953665-34953709                           | NM_023792:-1279   | Pank1      | PROMOTER               | 0.123                                           | 0.687                            | 1815.11             | 1246.87             | 0.084                            | 1436.69             | 120.99              |
| A_68_P21634174 | chr2:131087984-131088028                          | NM_153501:-229    | Pank2      | PROMOTER               | 0.255                                           | 0.605                            | 979.32              | 592.66              | 0.154                            | 756.60              | 116.58              |
| A_68_P27708453 | chr11:35582983-35583027                           | NM_145962:8       | Pank3      | INSIDE                 | 0.196                                           | 0.442                            | 1834.62             | 811.64              | 0.087                            | 1387.60             | 120.16              |
| A_68_P30422878 | chr15:88898359-88898403                           | NM_001002005:8225 | Panx2      | INSIDE                 | 0.474                                           | 2.966                            | 1936.80             | 5744.91             | 1.406                            | 1405.19             | 1975.56             |
| A_68_P29228004 | chr13:93962351-93962395                           | NM_133905:-134    | Papd4      | PROMOTER               | 0.394                                           | 0.345                            | 2639.04             | 910.03              | 0.136                            | 2030.41             | 275.52              |
| A_68_P26039502 | chr8:90722771-90722830                            | NM_001164497:-311 | Papd5      | PROMOTER               | 0.235                                           | 0.596                            | 1067.36             | 635.66              | 0.140                            | 879.73              | 123.07              |
| A_68_P24152138 | chr5:143005802-143005846                          | NM_019943:206     | Papolb     | INSIDE                 | 0.347                                           | 1.795                            | 1155.09             | 2073.25             | 0.622                            | 916.43              | 569.98              |
| A_68_P32071012 | chr19:32670221-32670265                           | NM_001201470:38   | Papss2     | INSIDE                 | 0.140                                           | 0.694                            | 1559.72             | 1082.10             | 0.097                            | 1288.82             | 125.51              |
| A_68_P32071016 | chr19:32670611-32670655                           | NM_001201470:428  | Papss2     | INSIDE                 | 0.262                                           | 0.565                            | 905.97              | 511.93              | 0.148                            | 817.77              | 121.14              |
| A_68_P20074998 | chr1:20880874-20880920                            | NM_028829:194     | Paqr8      | INSIDE                 | 0.574                                           | 0.697                            | 1920.11             | 1338.10             | 0.400                            | 1499.85             | 599.83              |
| A_68_P26742491 | chr9:95459602-95459646                            | NM_198414:-611    | Paqr9      | PROMOTER               | 0.221                                           | 0.494                            | 3459.56             | 1710.48             | 0.109                            | 2436.14             | 266.52              |
| A_68_P26742492 | chr9:95459743-95459787                            | NM_198414:-471    | Paqr9      | PROMOTER               | 0.261                                           | 0.585                            | 2114.75             | 1237.23             | 0.152                            | 1786.35             | 272.26              |
| A_68_P26742504 | chr9:95461303-95461354                            | NM_198414:1093    | Paqr9      | INSIDE                 | 0.613                                           | 2.623                            | 1333.75             | 3498.63             | 1.608                            | 977.47              | 1572.11             |
| A_68_P26261063 | chr8:129588776-129588820                          | NM_001122850:843  | Pard3      | INSIDE                 | 0.513                                           | 0.555                            | 1085.47             | 602.93              | 0.285                            | 750.86              | 213.86              |
| A_68_P26261064 | chr8:129588848-129588893                          | NM_001122850:915  | Pard3      | INSIDE                 | 0.268                                           | 0.728                            | 3734.54             | 2719.01             | 0.195                            | 2724.24             | 531.59              |
| A_68_P21839348 | chr2:167905989-167906034                          | NM_021409:-492    | Pard6b     | PROMOTER               | 0.266                                           | 0.582                            | 2128.01             | 1238.18             | 0.155                            | 1636.37             | 253.01              |
| A_68_P21839349 | chr2:167906063-167906107                          | NM_021409:-419    | Pard6b     | PROMOTER               | 0.639                                           | 0.437                            | 1735.05             | 758.43              | 0.280                            | 1323.04             | 369.83              |
| A_68_P21839459 | chr2:167924216-167924266                          | NM_021409:17737   | Pard6b     | INSIDE                 | 0.486                                           | 3.416                            | 584.47              | 1996.35             | 1.659                            | 535.97              | 889.17              |
| A_68_P31861993 | chr18:80244305-80244349                           | NM_053117:693     | Pard6g     | INSIDE                 | 0.284                                           | 0.562                            | 1948.38             | 1094.44             | 0.160                            | 1442.57             | 230.37              |
| A_68_P31861995 | chr18:80244514-80244558                           | NM_053117:903     | Pard6g     | INSIDE                 | 0.315                                           | 0.662                            | 1985.56             | 1314.53             | 0.208                            | 1482.63             | 308.80              |
| A_68_P31041951 | chr17:11033242-11033286                           | NM_016694:15      | Park2      | INSIDE                 | 0.388                                           | 0.416                            | 1724.79             | 716.92              | 0.161                            | 1429.97             | 230.49              |
| A_68_P30587017 | chr16:20302514-20302558                           | NM_001005767:-101 | Parl       | PROMOTER               | 0.547                                           | 0.730                            | 2179.68             | 1592.07             | 0.400                            | 1745.38             | 697.47              |
| A_68_P30558433 | chr16:13668026-13668070                           | NM_028761:215     | Parn       | INSIDE                 | 0.160                                           | 0.541                            | 1759.66             | 952.82              | 0.087                            | 1443.54             | 124.88              |
| A_68_P24832846 | chr6:127403694-127403738                          | NM_181402:-24     | Parp11     | PROMOTER               | 0.138                                           | 0.672                            | 1613.64             | 1084.01             | 0.093                            | 1365.72             | 126.94              |

| ProbeName      | Target position of probe on CpG island microarray | TargetID           | GeneSymbol | CpG island Description | Ratio of relative methylation (TiO2-NP/Vehicle) | Sham group                       |                     |                     | TiO <sub>2</sub> -H group        |                     |                     |
|----------------|---------------------------------------------------|--------------------|------------|------------------------|-------------------------------------------------|----------------------------------|---------------------|---------------------|----------------------------------|---------------------|---------------------|
|                |                                                   |                    |            |                        |                                                 | Relative methylation (Cy-5/Cy-3) | Cy-3 signal (Input) | Cy-5 signal (MeDIP) | Relative methylation (Cy-5/Cy-3) | Cy-3 signal (Input) | Cy-5 signal (MeDIP) |
| A_68_P26586478 | chr9:65063416-65063460                            | NM_177460:942      | Parp16     | INSIDE                 | 0.538                                           | 0.609                            | 1142.28             | 695.48              | 0.328                            | 1012.99             | 332.08              |
| A_68_P26554372 | chr9:59464905-59464949                            | NM_001205239:-164  | Parp6      | PROMOTER               | 0.634                                           | 0.673                            | 1353.16             | 910.63              | 0.427                            | 1197.47             | 510.94              |
| A_68_P23185679 | chr4:106323706-106323750                          | NM_001083887:55    | Pars2      | INSIDE                 | 0.163                                           | 0.566                            | 2228.52             | 1261.77             | 0.092                            | 1438.05             | 132.66              |
| A_68_P23185680 | chr4:106323776-106323820                          | NM_001083887:125   | Pars2      | INSIDE                 | 0.308                                           | 0.455                            | 3076.60             | 1399.50             | 0.140                            | 2264.92             | 317.68              |
| A_68_P23185681 | chr4:106323879-106323923                          | NM_001083887:227   | Pars2      | INSIDE                 | 0.137                                           | 0.584                            | 2148.44             | 1254.58             | 0.080                            | 1505.26             | 120.70              |
| A_68_P20454938 | chr1:95239228-95239272                            | NM_080850:115      | Pask       | INSIDE                 | 0.244                                           | 0.722                            | 3157.92             | 2279.07             | 0.176                            | 2475.54             | 436.55              |
| A_68_P20454941 | chr1:95239500-95239544                            | NM_080850:-157     | Pask       | DIVERGENT_PROMOTER     | 0.107                                           | 0.473                            | 3446.19             | 1631.35             | 0.050                            | 2631.85             | 132.78              |
| A_68_P27551111 | chr11:3188684-3188734                             | NM_019574:-1751    | Patz1      | PROMOTER               | 0.308                                           | 0.466                            | 1570.97             | 731.51              | 0.143                            | 1116.85             | 160.23              |
| A_68_P27551119 | chr11:3189697-3189741                             | NM_019574:-741     | Patz1      | PROMOTER               | 0.552                                           | 0.697                            | 1944.77             | 1355.02             | 0.385                            | 1623.76             | 625.05              |
| A_68_P21723787 | chr2:147191374-147191418                          | NM_008780:667      | Pax1       | INSIDE                 | 0.129                                           | 0.702                            | 1777.16             | 1247.03             | 0.091                            | 1304.96             | 118.15              |
| A_68_P32134165 | chr19:44825072-44825116                           | NM_011037:-6789    | Pax2       | PROMOTER               | 0.172                                           | 1.527                            | 2932.08             | 4477.73             | 0.263                            | 1876.06             | 492.54              |
| A_68_P32134210 | chr19:44830843-44830902                           | NM_011037:-1011    | Pax2       | PROMOTER               | 0.165                                           | 0.489                            | 1882.38             | 920.56              | 0.081                            | 1460.59             | 118.05              |
| A_68_P32134211 | chr19:44831069-44831120                           | NM_011037:-789     | Pax2       | PROMOTER               | 0.239                                           | 0.579                            | 1189.72             | 689.32              | 0.138                            | 867.34              | 120.06              |
| A_68_P32134218 | chr19:44831888-44831933                           | NM_011037:27       | Pax2       | INSIDE                 | 0.429                                           | 0.555                            | 3005.41             | 1667.93             | 0.238                            | 2302.50             | 547.97              |
| A_68_P32134234 | chr19:44833782-44833828                           | NM_011037:1921     | Pax2       | INSIDE                 | 0.139                                           | 1.435                            | 851.73              | 1221.82             | 0.200                            | 596.65              | 119.30              |
| A_68_P32134814 | chr19:44910682-44910726                           | NM_011037:78821    | Pax2       | INSIDE                 | 0.254                                           | 0.557                            | 1819.58             | 1012.69             | 0.141                            | 1503.55             | 212.19              |
| A_68_P32134817 | chr19:44911075-44911119                           | NM_011037:79213    | Pax2       | INSIDE                 | 0.207                                           | 0.665                            | 3155.10             | 2098.20             | 0.137                            | 2086.37             | 286.87              |
| A_68_P32134818 | chr19:44911149-44911193                           | NM_011037:79287    | Pax2       | INSIDE                 | 0.154                                           | 0.626                            | 6495.60             | 4068.15             | 0.096                            | 4693.29             | 452.72              |
| A_68_P20370345 | chr1:78186294-78186338                            | NM_001159520:7395  | Pax3       | INSIDE                 | 0.205                                           | 0.389                            | 2393.57             | 931.76              | 0.080                            | 2085.41             | 166.70              |
| A_68_P20370400 | chr1:78193226-78193270                            | NM_001159520:463   | Pax3       | INSIDE                 | 0.285                                           | 0.398                            | 2203.97             | 877.86              | 0.114                            | 1787.04             | 203.17              |
| A_68_P20370402 | chr1:78193529-78193573                            | NM_001159520:161   | Pax3       | INSIDE                 | 0.652                                           | 0.595                            | 1505.07             | 895.51              | 0.388                            | 1258.59             | 488.35              |
| A_68_P20370404 | chr1:78193792-78193836                            | NM_001159520:-103  | Pax3       | PROMOTER               | 0.252                                           | 0.338                            | 2355.52             | 795.38              | 0.085                            | 2047.23             | 173.97              |
| A_68_P20370459 | chr1:78200539-78200583                            | NM_001159520:-6849 | Pax3       | PROMOTER               | 0.536                                           | 0.683                            | 1263.90             | 862.82              | 0.366                            | 1074.63             | 393.14              |
| A_68_P22878366 | chr4:44676950-44676994                            | NM_008782:46340    | Pax5       | INSIDE                 | 0.453                                           | 0.427                            | 2104.81             | 898.28              | 0.193                            | 1633.81             | 316.01              |
| A_68_P22878640 | chr4:44716235-44716287                            | NM_008782:7052     | Pax5       | INSIDE                 | 0.107                                           | 0.735                            | 2237.57             | 1644.59             | 0.079                            | 1541.99             | 121.19              |
| A_68_P22878698 | chr4:44723640-44723686                            | NM_008782:-350     | Pax5       | PROMOTER               | 0.320                                           | 0.538                            | 1095.77             | 589.27              | 0.172                            | 901.83              | 155.05              |
| A_68_P21495956 | chr2:105515369-105515413                          | NM_013627:-1211    | Pax6       | DIVERGENT_PROMOTER     | 0.493                                           | 0.451                            | 1145.93             | 516.28              | 0.222                            | 925.68              | 205.79              |
| A_68_P21495957 | chr2:105515455-105515507                          | NM_013627:-1121    | Pax6       | DIVERGENT_PROMOTER     | 0.291                                           | 0.604                            | 1261.47             | 761.99              | 0.176                            | 908.46              | 159.49              |
| A_68_P21496012 | chr2:105522220-105522268                          | NM_013627:5643     | Pax6       | INSIDE                 | 0.208                                           | 0.658                            | 989.65              | 651.41              | 0.137                            | 886.93              | 121.32              |
| A_68_P21495905 | chr2:105509058-105509107                          | NR_002867:1405     | Pax6os1    | INSIDE                 | 0.183                                           | 0.725                            | 1950.25             | 1414.48             | 0.133                            | 1395.68             | 185.05              |
| A_68_P21495906 | chr2:105509202-105509246                          | NR_002867:1263     | Pax6os1    | INSIDE                 | 0.254                                           | 0.687                            | 1818.45             | 1249.49             | 0.175                            | 1512.12             | 264.40              |
| A_68_P21495913 | chr2:105509959-105510003                          | NR_002867:507      | Pax6os1    | INSIDE                 | 0.502                                           | 0.575                            | 1299.46             | 747.59              | 0.289                            | 1042.77             | 301.29              |
| A_68_P21495934 | chr2:105512616-105512660                          | NR_002867:-2151    | Pax6os1    | DIVERGENT_PROMOTER     | 0.458                                           | 0.519                            | 1891.55             | 980.89              | 0.238                            | 1399.98             | 332.81              |
| A_68_P23354400 | chr4:139377667-139377712                          | NM_011039:11194    | Pax7       | INSIDE                 | 0.653                                           | 0.693                            | 2436.09             | 1687.37             | 0.452                            | 1808.82             | 817.53              |
| A_68_P23354401 | chr4:139377795-139377839                          | NM_011039:11067    | Pax7       | INSIDE                 | 0.090                                           | 0.624                            | 3088.81             | 1927.55             | 0.056                            | 2075.44             | 117.12              |
| A_68_P23354456 | chr4:139384273-139384317                          | NM_011039:4589     | Pax7       | INSIDE                 | 0.369                                           | 0.593                            | 1252.20             | 742.35              | 0.219                            | 1007.13             | 220.38              |
| A_68_P23354457 | chr4:139384411-139384455                          | NM_011039:4451     | Pax7       | INSIDE                 | 0.450                                           | 0.584                            | 995.36              | 581.26              | 0.263                            | 732.20              | 192.58              |
| A_68_P23354482 | chr4:139387475-139387522                          | NM_011039:1385     | Pax7       | INSIDE                 | 0.278                                           | 0.520                            | 1020.59             | 530.29              | 0.145                            | 863.91              | 124.90              |
| A_68_P23354494 | chr4:139389036-139389081                          | NM_011039:-175     | Pax7       | PROMOTER               | 0.502                                           | 0.643                            | 1596.62             | 1027.05             | 0.323                            | 1247.57             | 402.67              |
| A_68_P28458266 | chr12:57793635-57793679                           | NM_011041:-2969    | Pax9       | PROMOTER               | 0.481                                           | 0.582                            | 1359.23             | 791.15              | 0.280                            | 1150.77             | 322.38              |
| A_68_P28458297 | chr12:57797636-57797681                           | NM_011041:1033     | Pax9       | INSIDE                 | 0.201                                           | 0.481                            | 1608.53             | 774.33              | 0.097                            | 1229.54             | 118.93              |
| A_68_P28458300 | chr12:57797914-57797958                           | NM_011041:1311     | Pax9       | INSIDE                 | 0.153                                           | 0.445                            | 2475.66             | 1102.51             | 0.068                            | 1790.79             | 122.04              |
| A_68_P29675623 | chr14:66424674-66424718                           | NM_023209:-51      | Pbk        | PROMOTER               | 0.280                                           | 0.597                            | 1015.90             | 606.75              | 0.167                            | 859.53              | 143.56              |
| A_68_P31154665 | chr17:34729645-34729690                           | NM_017463:252      | Pbx2       | INSIDE                 | 0.182                                           | 0.709                            | 1466.36             | 1039.81             | 0.129                            | 925.73              | 119.51              |

| ProbeName      | Target position of probe on CpG island microarray | TargetID           | GeneSymbol | CpG island Description | Ratio of relative methylation (TiO2-NP/Vehicle) | Sham group                       |                     |                     | TiO <sub>2</sub> -H group        |                     |                     |
|----------------|---------------------------------------------------|--------------------|------------|------------------------|-------------------------------------------------|----------------------------------|---------------------|---------------------|----------------------------------|---------------------|---------------------|
|                |                                                   |                    |            |                        |                                                 | Relative methylation (Cy-5/Cy-3) | Cy-3 signal (Input) | Cy-5 signal (MeDIP) | Relative methylation (Cy-5/Cy-3) | Cy-3 signal (Input) | Cy-5 signal (MeDIP) |
| A_68_P25948236 | chr8:72356467-72356516                            | NM_001024954:-111  | Pbx4       | PROMOTER               | 0.327                                           | 0.419                            | 1294.35             | 542.72              | 0.137                            | 1029.47             | 141.14              |
| A_68_P25948238 | chr8:72356673-72356717                            | NM_001024954:92    | Pbx4       | INSIDE                 | 0.204                                           | 0.486                            | 1389.65             | 675.11              | 0.099                            | 1155.72             | 114.80              |
| A_68_P24610518 | chr6:86475728-86475772                            | NM_011865:409      | Pcbp1      | INSIDE                 | 0.197                                           | 0.480                            | 2496.08             | 1198.88             | 0.094                            | 1985.48             | 187.55              |
| A_68_P24610519 | chr6:86475835-86475879                            | NM_011865:303      | Pcbp1      | INSIDE                 | 0.627                                           | 0.549                            | 1089.32             | 598.13              | 0.344                            | 781.72              | 268.95              |
| A_68_P30498007 | chr15:102301316-102301361                         | NM_001103165:276   | Pcbp2      | INSIDE                 | 0.542                                           | 0.688                            | 1724.37             | 1187.17             | 0.373                            | 1255.17             | 468.11              |
| A_68_P27265099 | chr10:76424280-76424324                           | NM_021568:390      | Pcbp3      | INSIDE                 | 0.557                                           | 0.670                            | 1142.64             | 765.24              | 0.373                            | 972.69              | 362.62              |
| A_68_P26803472 | chr9:106355981-106356025                          | NM_021567:-185     | Pcbp4      | PROMOTER               | 0.371                                           | 0.633                            | 3803.95             | 2409.24             | 0.235                            | 2799.94             | 658.50              |
| A_68_P29962216 | chr14:122933648-122933692                         | NM_144844:121      | Pcca       | INSIDE                 | 0.349                                           | 0.590                            | 1001.64             | 591.10              | 0.206                            | 778.44              | 160.54              |
| A_68_P29962218 | chr14:122933824-122933868                         | NM_144844:297      | Pcca       | INSIDE                 | 0.242                                           | 0.347                            | 1782.42             | 618.16              | 0.084                            | 1398.41             | 117.43              |
| A_68_P31632700 | chr18:38371037-38371082                           | NM_029357:-1643    | Pcdh1      | PROMOTER               | 0.342                                           | 0.613                            | 1613.63             | 988.37              | 0.209                            | 1201.91             | 251.75              |
| A_68_P31632701 | chr18:38371127-38371171                           | NM_029357:-1732    | Pcdh1      | PROMOTER               | 0.451                                           | 0.621                            | 1033.23             | 641.43              | 0.280                            | 816.26              | 228.68              |
| A_68_P31633050 | chr18:38428628-38428672                           | NM_017378:15405    | Pcdh12     | INSIDE                 | 0.649                                           | 2.673                            | 409.14              | 1093.71             | 1.736                            | 411.17              | 713.73              |
| A_68_P29773644 | chr14:84845775-84845819                           | NM_001013753:2427  | Pcdh17     | INSIDE                 | 0.363                                           | 0.422                            | 2016.17             | 850.23              | 0.153                            | 1558.98             | 238.72              |
| A_68_P29773648 | chr14:84846227-84846278                           | NM_001013753:2883  | Pcdh17     | INSIDE                 | 0.156                                           | 0.714                            | 1627.35             | 1162.52             | 0.111                            | 1097.28             | 122.18              |
| A_68_P29773654 | chr14:84846918-84846962                           | NM_001013753:3571  | Pcdh17     | INSIDE                 | 0.147                                           | 0.570                            | 3206.13             | 1827.43             | 0.084                            | 2164.94             | 180.99              |
| A_68_P29773655 | chr14:84847043-84847087                           | NM_001013753:3695  | Pcdh17     | INSIDE                 | 0.340                                           | 0.515                            | 1272.98             | 656.18              | 0.175                            | 1056.78             | 185.20              |
| A_68_P23720369 | chr5:58111053-58111097                            | NM_018764:1815     | Pcdh7      | INSIDE                 | 0.342                                           | 0.626                            | 2357.92             | 1475.45             | 0.214                            | 1774.01             | 379.78              |
| A_68_P23720370 | chr5:58111147-58111191                            | NM_018764:1909     | Pcdh7      | INSIDE                 | 0.321                                           | 0.426                            | 3975.06             | 1691.86             | 0.137                            | 3268.28             | 446.41              |
| A_68_P23720372 | chr5:58111337-58111385                            | NM_018764:2101     | Pcdh7      | INSIDE                 | 0.255                                           | 0.561                            | 1135.39             | 637.20              | 0.143                            | 856.38              | 122.59              |
| A_68_P23720373 | chr5:58111459-58111503                            | NM_018764:2221     | Pcdh7      | INSIDE                 | 0.279                                           | 0.417                            | 1401.92             | 583.99              | 0.116                            | 1053.95             | 122.50              |
| A_68_P23720374 | chr5:58111556-58111604                            | NM_018764:2321     | Pcdh7      | INSIDE                 | 0.197                                           | 0.565                            | 1511.59             | 854.41              | 0.112                            | 1098.63             | 122.57              |
| A_68_P29753328 | chr14:80168173-80168220                           | NM_001042726:2923  | Pcdh8      | INSIDE                 | 0.138                                           | 0.588                            | 2210.42             | 1300.81             | 0.081                            | 1591.26             | 129.65              |
| A_68_P29753340 | chr14:80169561-80169605                           | NM_001042726:1537  | Pcdh8      | INSIDE                 | 0.305                                           | 0.490                            | 1698.45             | 832.13              | 0.149                            | 1298.54             | 193.99              |
| A_68_P29753373 | chr14:80173634-80173678                           | NM_001042726:-2537 | Pcdh8      | PROMOTER               | 0.320                                           | 0.556                            | 1738.60             | 966.09              | 0.178                            | 1417.39             | 252.02              |
| A_68_P31626274 | chr18:37107885-37107929                           | NM_007766:-4436    | Pcdha4     | PROMOTER               | 0.409                                           | 1.496                            | 948.35              | 1419.04             | 0.612                            | 808.66              | 495.14              |
| A_68_P31626368 | chr18:37121882-37121926                           | NM_007767:-5505    | Pcdha6     | PROMOTER               | 0.387                                           | 1.503                            | 820.70              | 1233.71             | 0.582                            | 675.98              | 393.51              |
| A_68_P31626861 | chr18:37249454-37249501                           | NM_001003671:-312  | Pcdhae1    | PROMOTER               | 0.281                                           | 0.621                            | 990.47              | 615.09              | 0.175                            | 820.09              | 143.12              |
| A_68_P31627037 | chr18:37303374-37303418                           | NM_001003672:-226  | Pcdhae2    | PROMOTER               | 0.505                                           | 0.615                            | 1109.08             | 682.28              | 0.311                            | 974.39              | 302.66              |
| A_68_P31627038 | chr18:37303465-37303509                           | NM_001003672:-136  | Pcdhae2    | PROMOTER               | 0.472                                           | 0.722                            | 1640.17             | 1184.88             | 0.341                            | 1425.13             | 486.14              |
| A_68_P31629954 | chr18:37927868-37927912                           | NM_033595:2657     | Pcdhga12   | INSIDE                 | 0.626                                           | 2.467                            | 799.41              | 1972.00             | 1.544                            | 724.94              | 1119.06             |
| A_68_P25326015 | chr7:99817991-99818041                            | NM_029078:406      | Pcf11      | INSIDE                 | 0.134                                           | 0.614                            | 2628.65             | 1613.87             | 0.082                            | 1783.14             | 147.02              |
| A_68_P25326019 | chr7:99818550-99818594                            | NM_029078:-150     | Pcf11      | PROMOTER               | 0.201                                           | 0.433                            | 1873.39             | 811.66              | 0.087                            | 1358.15             | 118.48              |
| A_68_P24591296 | chr6:83028488-83028532                            | NM_197992:127      | Pcgf1      | INSIDE                 | 0.347                                           | 0.334                            | 2005.96             | 669.57              | 0.116                            | 1555.03             | 180.15              |
| A_68_P28052172 | chr11:97560234-97560280                           | NM_001163307:442   | Pcgf2      | INSIDE                 | 0.269                                           | 0.365                            | 1830.49             | 668.55              | 0.098                            | 1345.75             | 132.28              |
| A_68_P32089879 | chr19:36483936-36483983                           | NM_029508:30403    | Pcgf5      | INSIDE                 | 0.319                                           | 0.629                            | 1456.26             | 915.91              | 0.201                            | 1108.73             | 222.72              |
| A_68_P25666151 | chr8:13104540-13104584                            | NM_178708:781      | Pcid2      | INSIDE                 | 0.172                                           | 0.596                            | 1830.38             | 1090.26             | 0.103                            | 1440.76             | 147.81              |
| A_68_P25666157 | chr8:13105151-13105195                            | NM_178708:171      | Pcid2      | INSIDE                 | 0.479                                           | 0.530                            | 1273.97             | 675.04              | 0.254                            | 1099.59             | 279.25              |
| A_68_P21820250 | chr2:164704772-164704816                          | NM_146129:-73      | Pcif1      | PROMOTER               | 0.171                                           | 0.620                            | 1393.16             | 864.05              | 0.106                            | 1130.88             | 120.09              |
| A_68_P21820255 | chr2:164705460-164705507                          | NM_146129:616      | Pcif1      | INSIDE                 | 0.641                                           | 0.500                            | 1254.20             | 627.53              | 0.321                            | 880.58              | 282.51              |
| A_68_P29618377 | chr14:56159128-56159172                           | NM_028994:48       | Pek2       | INSIDE                 | 0.196                                           | 0.562                            | 1662.31             | 934.91              | 0.110                            | 1178.46             | 129.72              |
| A_68_P25809871 | chr8:42325399-42325443                            | NM_023662:308      | Pcm1       | INSIDE                 | 0.584                                           | 0.450                            | 1836.14             | 826.68              | 0.263                            | 1441.26             | 379.25              |
| A_68_P21913061 | chr2:181572625-181572669                          | NM_153594:39       | Pemtd2     | INSIDE                 | 0.189                                           | 0.464                            | 1747.52             | 810.57              | 0.088                            | 1337.42             | 117.03              |
| A_68_P21913062 | chr2:181572751-181572795                          | NM_153594:165      | Pemtd2     | INSIDE                 | 0.338                                           | 0.523                            | 2130.87             | 1115.14             | 0.177                            | 1539.97             | 272.28              |
| A_68_P21639372 | chr2:132078905-132078949                          | NM_011045:-10      | Pena       | PROMOTER               | 0.220                                           | 0.479                            | 1561.67             | 748.74              | 0.105                            | 1221.16             | 128.56              |

| ProbeName      | Target position of probe on CpG island microarray | TargetID          | GeneSymbol | CpG island Description | Ratio of relative methylation (TiO2-NP/Vehicle) | Sham group                       |                     |                     | TiO <sub>2</sub> -H group        |                     |                     |
|----------------|---------------------------------------------------|-------------------|------------|------------------------|-------------------------------------------------|----------------------------------|---------------------|---------------------|----------------------------------|---------------------|---------------------|
|                |                                                   |                   |            |                        |                                                 | Relative methylation (Cy-5/Cy-3) | Cy-3 signal (Input) | Cy-5 signal (MeDIP) | Relative methylation (Cy-5/Cy-3) | Cy-3 signal (Input) | Cy-5 signal (MeDIP) |
| A_68_P21639373 | chr2:132078980-132079024                          | NM_011045:-86     | Pcna       | DIVERGENT_PROMOTER     | 0.537                                           | 0.674                            | 1327.11             | 894.74              | 0.362                            | 1078.25             | 390.50              |
| A_68_P30778928 | chr16:56029876-56029920                           | NM_001024622:-68  | Pcnp       | PROMOTER               | 0.427                                           | 0.540                            | 1618.80             | 874.03              | 0.230                            | 1205.16             | 277.78              |
| A_68_P20826590 | chr1:173126271-173126315                          | NM_025557:107     | Pcp411     | INSIDE                 | 0.353                                           | 0.406                            | 1496.51             | 607.24              | 0.143                            | 1375.90             | 196.87              |
| A_68_P32240897 | chrX:7499587-7499631                              | NM_013892:2661    | Pcsk1n     | INSIDE                 | 0.390                                           | 1.478                            | 1634.44             | 2416.47             | 0.577                            | 700.79              | 404.31              |
| A_68_P32240898 | chrX:7499680-7499725                              | NM_013892:2755    | Pcsk1n     | INSIDE                 | 0.059                                           | 2.926                            | 2124.50             | 6217.11             | 0.173                            | 806.98              | 139.48              |
| A_68_P32240899 | chrX:7499781-7499825                              | NM_013892:2855    | Pcsk1n     | INSIDE                 | 0.198                                           | 1.476                            | 3780.26             | 5580.09             | 0.292                            | 1500.72             | 438.65              |
| A_68_P27282471 | chr10:79786234-79786278                           | NM_008793:5962    | Pcsk4      | INSIDE                 | 0.442                                           | 0.580                            | 1614.05             | 936.13              | 0.257                            | 1117.69             | 286.72              |
| A_68_P31988616 | chr19:17911313-17911358                           | NM_001190483:787  | Pcsk5      | INSIDE                 | 0.466                                           | 0.599                            | 1225.76             | 734.57              | 0.279                            | 1047.43             | 292.23              |
| A_68_P25184944 | chr7:73007570-73007614                            | NM_011048:571     | Pcsk6      | INSIDE                 | 0.335                                           | 0.459                            | 2435.49             | 1117.45             | 0.154                            | 1976.39             | 303.45              |
| A_68_P23184552 | chr4:106136609-106136653                          | NM_153565:300     | Pcsk9      | INSIDE                 | 0.297                                           | 0.606                            | 1091.54             | 661.02              | 0.180                            | 828.68              | 148.97              |
| A_68_P23184553 | chr4:106136681-106136725                          | NM_153565:228     | Pcsk9      | INSIDE                 | 0.236                                           | 0.585                            | 2619.25             | 1531.96             | 0.138                            | 1790.12             | 246.69              |
| A_68_P28009091 | chr11:89864227-89864271                           | NM_008796:-40     | Pctp       | PROMOTER               | 0.107                                           | 1.961                            | 1527.77             | 2996.19             | 0.210                            | 1137.92             | 239.47              |
| A_68_P31923508 | chr19:4510485-4510529                             | NM_001162946:35   | Pcx        | INSIDE                 | 0.328                                           | 0.570                            | 1057.80             | 603.33              | 0.187                            | 953.77              | 178.46              |
| A_68_P31923511 | chr19:4510848-4510892                             | NM_001162946:399  | Pcx        | INSIDE                 | 0.494                                           | 0.652                            | 1093.31             | 712.58              | 0.322                            | 931.84              | 299.86              |
| A_68_P24609843 | chr6:86338939-86338994                            | NM_025823:8178    | Pcyox1     | INSIDE                 | 0.510                                           | 3.848                            | 666.54              | 2564.55             | 1.963                            | 552.45              | 1084.53             |
| A_68_P30652429 | chr16:32431312-32431356                           | NM_001163160:19   | Pcyt1a     | INSIDE                 | 0.338                                           | 0.624                            | 1228.22             | 766.59              | 0.211                            | 906.99              | 191.58              |
| A_68_P30652430 | chr16:32431382-32431427                           | NM_001163160:89   | Pcyt1a     | INSIDE                 | 0.328                                           | 0.516                            | 1340.09             | 691.10              | 0.169                            | 1008.66             | 170.45              |
| A_68_P28185658 | chr11:120478932-120478976                         | NM_024229:250     | Pcyt2      | INSIDE                 | 0.304                                           | 0.441                            | 1269.98             | 560.42              | 0.134                            | 936.43              | 125.46              |
| A_68_P24164493 | chr5:145900637-145900681                          | NM_001033313:300  | Pdap1      | INSIDE                 | 0.271                                           | 0.483                            | 1518.33             | 733.67              | 0.131                            | 1248.49             | 163.74              |
| A_68_P25050419 | chr7:36432218-36432262                            | NM_019746:261     | Pded5      | INSIDE                 | 0.495                                           | 0.524                            | 1773.00             | 928.48              | 0.259                            | 1469.40             | 381.18              |
| A_68_P29145567 | chr13:74454737-74454781                           | NM_011051:16      | Pded6      | INSIDE                 | 0.622                                           | 0.375                            | 1578.31             | 592.15              | 0.233                            | 1210.49             | 282.42              |
| A_68_P26587155 | chr9:65194859-65194910                            | NM_016688:1010    | Pded7      | INSIDE                 | 0.090                                           | 0.674                            | 2960.66             | 1995.37             | 0.060                            | 2000.98             | 120.88              |
| A_68_P21141628 | chr2:37214555-37214599                            | NM_026176:276     | Pdel       | INSIDE                 | 0.120                                           | 0.666                            | 6876.50             | 4579.52             | 0.080                            | 4719.56             | 378.34              |
| A_68_P21141629 | chr2:37214726-37214772                            | NM_026176:104     | Pdel       | INSIDE                 | 0.228                                           | 0.656                            | 929.43              | 609.90              | 0.150                            | 810.06              | 121.39              |
| A_68_P20163206 | chr1:39044427-39044471                            | NM_026850:-210    | Pdel3      | PROMOTER               | 0.494                                           | 0.423                            | 3066.50             | 1298.39             | 0.209                            | 2276.08             | 476.23              |
| A_68_P31029178 | chr17:8995181-8995225                             | NM_011866:593     | Pde10a     | INSIDE                 | 0.463                                           | 0.718                            | 1523.98             | 1094.69             | 0.333                            | 1280.21             | 425.82              |
| A_68_P31029179 | chr17:8995332-8995389                             | NM_011866:751     | Pde10a     | INSIDE                 | 0.256                                           | 0.381                            | 1595.08             | 607.53              | 0.098                            | 1245.60             | 121.50              |
| A_68_P29482952 | chr14:27488079-27488123                           | NM_178668:1232    | Pde12      | INSIDE                 | 0.363                                           | 0.480                            | 1875.53             | 900.54              | 0.174                            | 1450.80             | 252.82              |
| A_68_P30504522 | chr15:103333324-103333368                         | NM_008800:-382    | Pde1b      | PROMOTER               | 0.587                                           | 0.563                            | 5703.82             | 3213.64             | 0.331                            | 4299.93             | 1422.32             |
| A_68_P25373531 | chr7:108599782-108599826                          | NR_026574:-17     | Pde2a      | PROMOTER               | 0.365                                           | 0.492                            | 4645.45             | 2283.91             | 0.179                            | 3315.28             | 594.43              |
| A_68_P25373532 | chr7:108599866-108599910                          | NR_026574:67      | Pde2a      | INSIDE                 | 0.408                                           | 0.510                            | 2866.26             | 1461.57             | 0.208                            | 2125.20             | 441.78              |
| A_68_P25373934 | chr7:108653145-108653191                          | NR_026574:53347   | Pde2a      | INSIDE                 | 0.424                                           | 0.629                            | 892.80              | 561.63              | 0.267                            | 682.21              | 181.86              |
| A_68_P25435754 | chr7:121559761-121559805                          | NM_011055:1015    | Pde3b      | INSIDE                 | 0.473                                           | 0.659                            | 838.96              | 553.00              | 0.312                            | 774.19              | 241.19              |
| A_68_P26345766 | chr9:20969493-20969537                            | NM_183408:-643    | Pde4a      | PROMOTER               | 0.508                                           | 0.715                            | 1602.54             | 1145.24             | 0.363                            | 1262.67             | 458.37              |
| A_68_P26345767 | chr9:20969656-20969700                            | NM_183408:-479    | Pde4a      | PROMOTER               | 0.453                                           | 0.615                            | 2161.01             | 1329.88             | 0.279                            | 1648.17             | 459.14              |
| A_68_P26345850 | chr9:20988460-20988504                            | NM_183408:18325   | Pde4a      | INSIDE                 | 0.592                                           | 0.536                            | 1152.31             | 617.18              | 0.317                            | 1038.81             | 329.58              |
| A_68_P22356948 | chr3:97692392-97692436                            | NM_001039376:216  | Pde4dip    | INSIDE                 | 0.649                                           | 0.684                            | 2626.34             | 1796.39             | 0.444                            | 2051.58             | 910.16              |
| A_68_P22356950 | chr3:97692610-97692655                            | NM_001039376:-2   | Pde4dip    | PROMOTER               | 0.180                                           | 0.581                            | 1515.51             | 880.91              | 0.105                            | 1143.04             | 119.58              |
| A_68_P22356952 | chr3:97692829-97692873                            | NM_001039376:-220 | Pde4dip    | PROMOTER               | 0.565                                           | 0.581                            | 1173.35             | 681.71              | 0.328                            | 892.32              | 292.93              |
| A_68_P22484165 | chr3:122432345-122432393                          | NM_153422:293     | Pde5a      | INSIDE                 | 0.241                                           | 0.718                            | 1869.49             | 1342.96             | 0.173                            | 1351.58             | 233.54              |
| A_68_P22484166 | chr3:122432487-122432536                          | NM_153422:436     | Pde5a      | INSIDE                 | 0.267                                           | 0.522                            | 1141.46             | 595.92              | 0.140                            | 846.25              | 118.12              |
| A_68_P20412903 | chr1:88479253-88479300                            | NM_008801:-200    | Pde6d      | DIVERGENT_PROMOTER     | 0.218                                           | 0.585                            | 1102.76             | 644.58              | 0.127                            | 917.18              | 116.84              |
| A_68_P25270819 | chr7:88358500-88358544                            | NM_008803:-167    | Pde8a      | PROMOTER               | 0.666                                           | 0.579                            | 1813.83             | 1049.79             | 0.386                            | 1581.86             | 609.83              |
| A_68_P31139420 | chr17:31523449-31523493                           | NM_001163748:292  | Pde9a      | INSIDE                 | 0.649                                           | 0.538                            | 1767.14             | 951.56              | 0.349                            | 1459.95             | 509.92              |

| ProbeName      | Target position of probe on CpG island microarray | TargetID          | GeneSymbol | CpG island Description | Ratio of relative methylation (TiO2-NP/Vehicle) | Sham group                       |                     |                     | TiO <sub>2</sub> -H group        |                     |                     |
|----------------|---------------------------------------------------|-------------------|------------|------------------------|-------------------------------------------------|----------------------------------|---------------------|---------------------|----------------------------------|---------------------|---------------------|
|                |                                                   |                   |            |                        |                                                 | Relative methylation (Cy-5/Cy-3) | Cy-3 signal (Input) | Cy-5 signal (MeDIP) | Relative methylation (Cy-5/Cy-3) | Cy-3 signal (Input) | Cy-5 signal (MeDIP) |
| A_68_P31139421 | chr17:31523560-31523605                           | NM_001163748:404  | Pde9a      | INSIDE                 | 0.507                                           | 0.698                            | 1798.13             | 1254.35             | 0.354                            | 1297.10             | 459.05              |
| A_68_P26142833 | chr8:109572050-109572094                          | NM_026513:442     | Pdf        | INSIDE                 | 0.617                                           | 0.486                            | 1244.49             | 605.28              | 0.300                            | 975.92              | 293.09              |
| A_68_P26142834 | chr8:109572130-109572174                          | NM_026513:362     | Pdf        | INSIDE                 | 0.203                                           | 0.667                            | 2418.04             | 1612.21             | 0.135                            | 1921.62             | 260.15              |
| A_68_P24132961 | chr5:139469670-139469719                          | NM_008808:1213    | Pdgfa      | INSIDE                 | 0.419                                           | 0.450                            | 1236.09             | 555.78              | 0.188                            | 951.74              | 179.09              |
| A_68_P24132967 | chr5:139470355-139470399                          | NM_008808:531     | Pdgfa      | INSIDE                 | 0.399                                           | 0.437                            | 1789.36             | 781.96              | 0.174                            | 1451.55             | 253.04              |
| A_68_P30369725 | chr15:79844779-79844823                           | NM_011057:438     | Pdgfb      | INSIDE                 | 0.457                                           | 0.450                            | 1476.58             | 664.16              | 0.206                            | 1097.39             | 225.69              |
| A_68_P22271765 | chr3:80840549-80840593                            | NM_019971:233     | Pdgfc      | INSIDE                 | 0.307                                           | 0.655                            | 4758.85             | 3117.57             | 0.201                            | 4044.76             | 812.21              |
| A_68_P26282994 | chr9:6168621-6168669                              | NM_027924:33      | Pdgfd      | INSIDE                 | 0.572                                           | 0.493                            | 1583.15             | 781.21              | 0.282                            | 1232.96             | 348.13              |
| A_68_P26282995 | chr9:6168715-6168768                              | NM_027924:130     | Pdgfd      | INSIDE                 | 0.438                                           | 0.570                            | 1318.34             | 751.53              | 0.250                            | 1144.98             | 285.94              |
| A_68_P26282996 | chr9:6168807-6168852                              | NM_027924:218     | Pdgfd      | INSIDE                 | 0.263                                           | 0.506                            | 1127.69             | 570.19              | 0.133                            | 862.98              | 114.97              |
| A_68_P22582958 | chr3:140874353-140874397                          | NM_008811:945     | Pdha2      | INSIDE                 | 0.623                                           | 2.348                            | 2156.64             | 5063.04             | 1.462                            | 1808.41             | 2643.97             |
| A_68_P29388217 | chr14:9005728-9005772                             | NM_024221:-244    | Pdhh       | PROMOTER               | 0.495                                           | 0.695                            | 1410.05             | 979.64              | 0.344                            | 1176.69             | 404.65              |
| A_68_P21580767 | chr2:121239698-121239742                          | NM_007952:83      | Pdia3      | INSIDE                 | 0.488                                           | 0.464                            | 1856.14             | 861.06              | 0.226                            | 1526.10             | 345.63              |
| A_68_P21580771 | chr2:121240143-121240187                          | NM_007952:527     | Pdia3      | INSIDE                 | 0.327                                           | 0.376                            | 2675.08             | 1004.86             | 0.123                            | 2061.48             | 253.29              |
| A_68_P30670426 | chr16:35490448-35490492                           | NM_028295:489     | Pdia5      | INSIDE                 | 0.256                                           | 0.596                            | 2155.10             | 1283.41             | 0.153                            | 1781.12             | 272.00              |
| A_68_P30670427 | chr16:35490517-35490561                           | NM_028295:421     | Pdia5      | INSIDE                 | 0.198                                           | 0.487                            | 1977.23             | 963.58              | 0.097                            | 1496.50             | 144.72              |
| A_68_P28269480 | chr12:17273418-17273462                           | NM_027959:40      | Pdia6      | INSIDE                 | 0.510                                           | 0.651                            | 2058.29             | 1340.09             | 0.332                            | 1785.25             | 592.77              |
| A_68_P28269482 | chr12:17273597-17273641                           | NM_027959:218     | Pdia6      | INSIDE                 | 0.465                                           | 0.497                            | 1277.94             | 634.88              | 0.231                            | 976.51              | 225.42              |
| A_68_P21322065 | chr2:71710952-71710996                            | NM_172665:-354    | Pdk1       | PROMOTER               | 0.639                                           | 0.668                            | 901.20              | 601.73              | 0.427                            | 682.81              | 291.47              |
| A_68_P21322066 | chr2:71711031-71711075                            | NM_172665:-276    | Pdk1       | PROMOTER               | 0.438                                           | 0.474                            | 2335.40             | 1106.96             | 0.207                            | 1733.94             | 359.64              |
| A_68_P21322074 | chr2:71711897-71711941                            | NM_172665:590     | Pdk1       | INSIDE                 | 0.645                                           | 0.552                            | 1129.30             | 623.13              | 0.356                            | 993.73              | 353.69              |
| A_68_P32107646 | chr19:40345679-40345723                           | NM_016861:406     | Pdlim1     | INSIDE                 | 0.651                                           | 0.346                            | 2015.46             | 697.52              | 0.225                            | 1704.07             | 384.19              |
| A_68_P32107650 | chr19:40346140-40346184                           | NM_016861:-56     | Pdlim1     | PROMOTER               | 0.378                                           | 0.425                            | 1347.60             | 572.21              | 0.161                            | 1066.57             | 171.25              |
| A_68_P29699779 | chr14:70576599-70576643                           | NM_145978:859     | Pdlim2     | INSIDE                 | 0.593                                           | 0.557                            | 3028.68             | 1686.77             | 0.330                            | 2376.19             | 784.84              |
| A_68_P22590679 | chr3:142058808-142058852                          | NM_001190852:-170 | Pdlim5     | PROMOTER               | 0.315                                           | 0.562                            | 1240.68             | 697.58              | 0.177                            | 985.94              | 174.41              |
| A_68_P29055509 | chr13:55614601-55614645                           | NM_001114088:178  | Pdlim7     | INSIDE                 | 0.383                                           | 0.398                            | 3015.47             | 1199.10             | 0.152                            | 2314.74             | 352.41              |
| A_68_P26129290 | chr8:107115528-107115572                          | NM_001024606:183  | Pdp2       | INSIDE                 | 0.612                                           | 0.632                            | 3062.32             | 1936.90             | 0.387                            | 2437.09             | 943.68              |
| A_68_P21752417 | chr2:152841063-152841107                          | NM_178939:35      | Pdrg1      | INSIDE                 | 0.268                                           | 0.557                            | 1741.01             | 969.95              | 0.149                            | 1317.68             | 196.70              |
| A_68_P21752418 | chr2:152841222-152841266                          | NM_178939:-125    | Pdrg1      | PROMOTER               | 0.513                                           | 0.656                            | 1014.82             | 665.35              | 0.336                            | 837.41              | 281.53              |
| A_68_P24192245 | chr5:151476526-151476570                          | NM_175310:147     | Pds5b      | INSIDE                 | 0.264                                           | 0.473                            | 2267.39             | 1073.05             | 0.125                            | 1818.86             | 227.40              |
| A_68_P24172758 | chr5:148081815-148081859                          | NM_008814:130     | Pdx1       | INSIDE                 | 0.217                                           | 0.637                            | 2676.54             | 1705.06             | 0.138                            | 1822.81             | 251.55              |
| A_68_P24172759 | chr5:148081959-148082003                          | NM_008814:274     | Pdx1       | INSIDE                 | 0.138                                           | 0.733                            | 3678.81             | 2696.06             | 0.101                            | 2571.85             | 259.42              |
| A_68_P30559565 | chr16:13903341-13903391                           | NM_001039533:-138 | Pdxdc1     | PROMOTER               | 0.343                                           | 0.446                            | 1252.10             | 558.00              | 0.153                            | 897.76              | 137.13              |
| A_68_P30363155 | chr15:78745009-78745053                           | NM_020271:682     | Pdpx       | INSIDE                 | 0.337                                           | 0.682                            | 2950.08             | 2011.01             | 0.229                            | 1987.34             | 456.04              |
| A_68_P32464979 | chrX:71069627-71069676                            | NM_001029868:657  | Pdzd4      | INSIDE                 | 0.194                                           | 1.750                            | 1041.83             | 1823.36             | 0.339                            | 435.07              | 147.53              |
| A_68_P32464981 | chrX:71069831-71069875                            | NM_001029868:456  | Pdzd4      | INSIDE                 | 0.171                                           | 1.688                            | 1122.43             | 1894.74             | 0.288                            | 528.09              | 152.05              |
| A_68_P30441118 | chr15:92227846-92227890                           | NM_001164593:628  | Pdzrn4     | INSIDE                 | 0.319                                           | 0.533                            | 1499.69             | 799.03              | 0.170                            | 1237.59             | 210.44              |
| A_68_P20335742 | chr1:72301442-72301486                            | NM_023523:29424   | Pecr       | DOWNSTREAM             | 0.618                                           | 0.387                            | 2902.68             | 1123.65             | 0.239                            | 2134.24             | 510.80              |
| A_68_P31926004 | chr19:4942668-4942712                             | NM_172835:402     | Peli3      | INSIDE                 | 0.322                                           | 0.727                            | 3180.37             | 2313.19             | 0.234                            | 2465.11             | 577.80              |
| A_68_P31926007 | chr19:4942924-4942968                             | NM_172835:146     | Peli3      | INSIDE                 | 0.192                                           | 1.330                            | 6473.47             | 8606.76             | 0.255                            | 4962.52             | 1267.16             |
| A_68_P29350210 | chr13:115880236-115880280                         | NM_134058:108     | Pelo       | INSIDE                 | 0.571                                           | 0.428                            | 1365.78             | 584.99              | 0.244                            | 1293.53             | 316.15              |
| A_68_P27900561 | chr11:70223294-70223338                           | NM_029231:217     | Pelp1      | INSIDE                 | 0.273                                           | 0.661                            | 1311.25             | 866.90              | 0.180                            | 1027.67             | 185.49              |
| A_68_P27900565 | chr11:70223680-70223724                           | NM_029231:-169    | Pelp1      | PROMOTER               | 0.604                                           | 0.542                            | 3105.07             | 1684.38             | 0.327                            | 2393.70             | 783.69              |
| A_68_P27900566 | chr11:70223756-70223800                           | NM_029231:-245    | Pelp1      | PROMOTER               | 0.264                                           | 0.691                            | 2541.05             | 1756.22             | 0.183                            | 1812.48             | 330.89              |

| ProbeName      | Target position of probe on CpG island microarray | TargetID           | GeneSymbol | CpG island Description | Ratio of relative methylation (TiO2-NP/Vehicle) | Sham group                       |                     |                     | TiO <sub>2</sub> -H group        |                     |                     |
|----------------|---------------------------------------------------|--------------------|------------|------------------------|-------------------------------------------------|----------------------------------|---------------------|---------------------|----------------------------------|---------------------|---------------------|
|                |                                                   |                    |            |                        |                                                 | Relative methylation (Cy-5/Cy-3) | Cy-3 signal (Input) | Cy-5 signal (MeDIP) | Relative methylation (Cy-5/Cy-3) | Cy-3 signal (Input) | Cy-5 signal (MeDIP) |
| A_68_P27840489 | chr11:59859589-59859648                           | NM_008819:-9277    | Pemt       | PROMOTER               | 0.033                                           | 2.790                            | 2341.77             | 6534.34             | 0.093                            | 1602.80             | 148.31              |
| A_68_P32135820 | chr19:45081022-45081066                           | NM_153796:-3       | Peo1       | DIVERGENT_PROMOTER     | 0.418                                           | 0.651                            | 2097.28             | 1365.42             | 0.272                            | 1519.11             | 413.74              |
| A_68_P21706810 | chr2:144194546-144194590                          | NM_001164813:-150  | Pet117     | PROMOTER               | 0.327                                           | 0.472                            | 1145.94             | 541.12              | 0.155                            | 963.15              | 148.85              |
| A_68_P23445965 | chr5:3596035-3596079                              | NM_027777:-9       | Pex1       | PROMOTER               | 0.553                                           | 0.527                            | 1240.26             | 653.58              | 0.291                            | 1005.49             | 292.76              |
| A_68_P23445966 | chr5:3596177-3596221                              | NM_027777:133      | Pex1       | INSIDE                 | 0.207                                           | 0.601                            | 1327.02             | 798.14              | 0.125                            | 969.34              | 120.85              |
| A_68_P27970616 | chr11:83112191-83112235                           | NM_134025:267      | Pex12      | INSIDE                 | 0.105                                           | 0.507                            | 2952.27             | 1498.13             | 0.053                            | 2221.79             | 118.43              |
| A_68_P27970618 | chr11:83112471-83112515                           | NM_134025:-13      | Pex12      | DIVERGENT_PROMOTER     | 0.281                                           | 0.631                            | 2669.29             | 1685.21             | 0.177                            | 1858.05             | 329.27              |
| A_68_P27970619 | chr11:83112556-83112601                           | NM_134025:-99      | Pex12      | DIVERGENT_PROMOTER     | 0.251                                           | 0.482                            | 1413.18             | 681.67              | 0.121                            | 991.90              | 120.15              |
| A_68_P23398660 | chr4:148473749-148473793                          | NM_019781:151      | Pex14      | INSIDE                 | 0.132                                           | 0.512                            | 2249.34             | 1152.53             | 0.068                            | 1731.93             | 116.97              |
| A_68_P26951868 | chr10:13272953-13272998                           | NM_001164195:-27   | Pex3       | PROMOTER               | 0.217                                           | 0.613                            | 1178.92             | 723.07              | 0.133                            | 901.64              | 119.76              |
| A_68_P24815138 | chr6:124364754-124364798                          | NM_008995:309      | Pex5       | INSIDE                 | 0.094                                           | 0.726                            | 2860.12             | 2077.77             | 0.068                            | 1976.67             | 135.04              |
| A_68_P24815139 | chr6:124364839-124364883                          | NM_008995:225      | Pex5       | INSIDE                 | 0.306                                           | 0.508                            | 4295.46             | 2180.83             | 0.156                            | 3282.57             | 510.53              |
| A_68_P27892526 | chr11:68821691-68821735                           | NM_001159519:250   | Pfas       | INSIDE                 | 0.260                                           | 0.679                            | 1985.15             | 1347.58             | 0.177                            | 1438.44             | 253.91              |
| A_68_P21853418 | chr2:170322093-170322137                          | NM_001013369:187   | Pfdn4      | INSIDE                 | 0.187                                           | 0.465                            | 1684.48             | 783.27              | 0.087                            | 1350.47             | 117.58              |
| A_68_P21853525 | chr2:170336931-170336975                          | NM_001110152:223   | Pfdn4      | INSIDE                 | 0.084                                           | 0.631                            | 3612.00             | 2280.58             | 0.053                            | 2589.43             | 137.14              |
| A_68_P21853526 | chr2:170337089-170337133                          | NM_001110152:381   | Pfdn4      | INSIDE                 | 0.422                                           | 0.689                            | 5002.07             | 3447.40             | 0.291                            | 3516.04             | 1022.07             |
| A_68_P20611336 | chr1:132612197-132612241                          | NM_001162416:-1065 | Pfkfb2     | PROMOTER               | 0.632                                           | 0.719                            | 1983.00             | 1426.16             | 0.454                            | 1578.71             | 717.52              |
| A_68_P20611337 | chr1:132612275-132612319                          | NM_001162416:-1143 | Pfkfb2     | PROMOTER               | 0.531                                           | 0.423                            | 1200.60             | 507.44              | 0.225                            | 1033.62             | 232.06              |
| A_68_P21006480 | chr2:11423558-11423602                            | NM_001177752:137   | Pfkfb3     | INSIDE                 | 0.103                                           | 0.622                            | 2601.96             | 1619.63             | 0.064                            | 1816.90             | 116.65              |
| A_68_P21006492 | chr2:11424861-11424905                            | NM_001177752:-1165 | Pfkfb3     | PROMOTER               | 0.651                                           | 0.537                            | 1161.10             | 623.36              | 0.349                            | 958.88              | 335.11              |
| A_68_P27271611 | chr10:77471981-77472025                           | NM_008826:539      | Pfkl       | INSIDE                 | 0.329                                           | 0.529                            | 1010.60             | 534.75              | 0.174                            | 660.99              | 114.95              |
| A_68_P27271615 | chr10:77472561-77472605                           | NM_008826:-41      | Pfkl       | PROMOTER               | 0.545                                           | 0.580                            | 1289.63             | 748.22              | 0.316                            | 1077.71             | 340.70              |
| A_68_P30473040 | chr15:97923295-97923339                           | NM_001163488:297   | Pfkm       | INSIDE                 | 0.373                                           | 0.398                            | 1591.36             | 632.58              | 0.148                            | 1158.36             | 171.82              |
| A_68_P27901889 | chr11:70467270-70467315                           | NM_011072:860      | Pfn1       | INSIDE                 | 0.140                                           | 0.714                            | 2299.71             | 1641.87             | 0.100                            | 1771.30             | 177.23              |
| A_68_P27901894 | chr11:70467828-70467872                           | NM_011072:302      | Pfn1       | INSIDE                 | 0.367                                           | 0.660                            | 1700.64             | 1122.36             | 0.242                            | 1120.07             | 271.19              |
| A_68_P32117863 | chr19:41986389-41986433                           | NM_023418:50       | Pgam1      | INSIDE                 | 0.268                                           | 0.485                            | 2687.15             | 1302.79             | 0.130                            | 2042.45             | 265.75              |
| A_68_P25377819 | chr7:109384967-109385014                          | NM_145583:13403    | Pgap2      | INSIDE                 | 0.562                                           | 2.859                            | 888.88              | 2541.17             | 1.608                            | 785.22              | 1262.72             |
| A_68_P26245546 | chr8:126957920-126957964                          | NM_171824:-106     | Pgbd5      | PROMOTER               | 0.501                                           | 0.410                            | 1437.98             | 590.23              | 0.206                            | 1129.08             | 232.08              |
| A_68_P23399007 | chr4:148540337-148540381                          | NM_001081274:458   | Pgd        | INSIDE                 | 0.369                                           | 0.494                            | 3376.20             | 1667.68             | 0.182                            | 2673.45             | 487.18              |
| A_68_P23399010 | chr4:148540735-148540779                          | NM_001081274:60    | Pgd        | INSIDE                 | 0.126                                           | 0.529                            | 2356.26             | 1247.01             | 0.067                            | 1780.51             | 118.91              |
| A_68_P31676055 | chr18:46440555-46440599                           | NM_172627:-72      | Pggt1b     | PROMOTER               | 0.535                                           | 0.619                            | 1297.61             | 802.79              | 0.331                            | 1152.58             | 381.29              |
| A_68_P25957670 | chr8:74115606-74115650                            | NM_025396:-454     | Pgls       | PROMOTER               | 0.410                                           | 0.602                            | 4980.29             | 3000.61             | 0.247                            | 3676.46             | 907.74              |
| A_68_P25957673 | chr8:74115916-74115960                            | NM_025396:-144     | Pgls       | PROMOTER               | 0.506                                           | 0.377                            | 3086.45             | 1162.11             | 0.191                            | 2465.23             | 470.05              |
| A_68_P25957674 | chr8:74115987-74116031                            | NM_025396:-74      | Pgls       | PROMOTER               | 0.650                                           | 0.586                            | 1398.98             | 819.98              | 0.381                            | 1063.00             | 404.72              |
| A_68_P25957680 | chr8:74116556-74116600                            | NM_025396:496      | Pgls       | INSIDE                 | 0.289                                           | 0.479                            | 1111.20             | 531.95              | 0.138                            | 852.96              | 118.07              |
| A_68_P25957709 | chr8:74120139-74120192                            | NM_025396:4083     | Pgls       | INSIDE                 | 0.266                                           | 0.620                            | 1070.78             | 664.12              | 0.165                            | 861.19              | 142.27              |
| A_68_P23749118 | chr5:64484258-64484302                            | NM_025700:92       | Pgm1       | INSIDE                 | 0.582                                           | 0.435                            | 1405.88             | 610.91              | 0.253                            | 1098.24             | 277.77              |
| A_68_P25366405 | chr7:107375733-107375777                          | NM_027629:-362     | Pgm21l     | PROMOTER               | 0.179                                           | 0.686                            | 1188.00             | 814.92              | 0.123                            | 969.53              | 119.37              |
| A_68_P25366411 | chr7:107376423-107376469                          | NM_027629:330      | Pgm21l     | INSIDE                 | 0.360                                           | 0.548                            | 1061.66             | 581.90              | 0.197                            | 888.06              | 175.38              |
| A_68_P26700012 | chr9:86465331-86465375                            | NM_001163746:97    | Pgm3       | INSIDE                 | 0.242                                           | 0.436                            | 1471.64             | 641.64              | 0.105                            | 1155.40             | 121.71              |
| A_68_P32026208 | chr19:24936124-24936168                           | NM_175013:186      | Pgm5       | INSIDE                 | 0.540                                           | 0.581                            | 1036.10             | 602.43              | 0.314                            | 837.92              | 263.05              |
| A_68_P31097499 | chr17:24607735-24607779                           | NM_025954:339      | Pgp        | INSIDE                 | 0.653                                           | 0.483                            | 1351.18             | 652.43              | 0.315                            | 1073.26             | 338.44              |
| A_68_P25953243 | chr8:73183392-73183436                            | NM_023217:166      | Pgpep1     | INSIDE                 | 0.271                                           | 0.620                            | 1913.18             | 1185.96             | 0.168                            | 1408.27             | 236.84              |
| A_68_P26293544 | chr9:8900444-8900488                              | NM_008829:634      | Pgr        | INSIDE                 | 0.309                                           | 0.392                            | 1565.31             | 613.31              | 0.121                            | 1155.13             | 139.75              |

| ProbeName      | Target position of probe on CpG island microarray | TargetID            | GeneSymbol | CpG island Description | Ratio of relative methylation (TiO2-NP/Vehicle) | Sham group                       |                     |                     | TiO <sub>2</sub> -H group        |                     |                     |
|----------------|---------------------------------------------------|---------------------|------------|------------------------|-------------------------------------------------|----------------------------------|---------------------|---------------------|----------------------------------|---------------------|---------------------|
|                |                                                   |                     |            |                        |                                                 | Relative methylation (Cy-5/Cy-3) | Cy-3 signal (Input) | Cy-5 signal (MeDIP) | Relative methylation (Cy-5/Cy-3) | Cy-3 signal (Input) | Cy-5 signal (MeDIP) |
| A_68_P32546910 | chrX:94267800-94267844                            | NM_001033361:-112   | Pgr151     | PROMOTER               | 0.251                                           | 1.589                            | 842.15              | 1338.09             | 0.399                            | 490.63              | 195.86              |
| A_68_P32319271 | chrX:34138375-34138419                            | NM_016783:177       | Pgrmc1     | INSIDE                 | 0.229                                           | 2.513                            | 5728.76             | 14398.84            | 0.576                            | 2272.59             | 1309.61             |
| A_68_P32319273 | chrX:34138558-34138602                            | NM_016783:361       | Pgrmc1     | INSIDE                 | 0.358                                           | 1.404                            | 1678.06             | 2355.96             | 0.502                            | 670.44              | 336.80              |
| A_68_P32319275 | chrX:34138849-34138893                            | NM_016783:651       | Pgrmc1     | INSIDE                 | 0.048                                           | 4.730                            | 1509.48             | 7140.44             | 0.225                            | 545.32              | 122.94              |
| A_68_P22082999 | chr3:40886268-40886325                            | NM_027558:672       | Pgrmc2     | INSIDE                 | 0.184                                           | 0.576                            | 1627.36             | 937.55              | 0.106                            | 1189.47             | 126.33              |
| A_68_P22083009 | chr3:40887619-40887663                            | NM_027558:-672      | Pgrmc2     | PROMOTER               | 0.638                                           | 0.606                            | 1226.19             | 743.43              | 0.387                            | 1036.50             | 400.86              |
| A_68_P28987052 | chr13:43011760-43011804                           | NM_001005740:206833 | Phactr1    | INSIDE                 | 0.438                                           | 0.656                            | 2490.44             | 1634.25             | 0.287                            | 2091.09             | 601.14              |
| A_68_P28987053 | chr13:43011826-43011870                           | NM_001005740:206899 | Phactr1    | INSIDE                 | 0.462                                           | 0.574                            | 1020.04             | 585.88              | 0.265                            | 896.87              | 237.93              |
| A_68_P26951409 | chr10:13193710-13193754                           | NM_001195065:470    | Phactr2    | INSIDE                 | 0.142                                           | 0.516                            | 3272.04             | 1686.83             | 0.073                            | 2460.01             | 179.63              |
| A_68_P21888794 | chr2:177877318-177877362                          | NM_028806:703       | Phactr3    | INSIDE                 | 0.304                                           | 0.532                            | 1007.53             | 536.11              | 0.162                            | 746.47              | 120.70              |
| A_68_P31731073 | chr18:56722210-56722254                           | NM_001162989:10     | Phax       | INSIDE                 | 0.339                                           | 0.611                            | 1265.55             | 772.81              | 0.207                            | 1014.37             | 209.81              |
| A_68_P24816532 | chr6:124662438-124662482                          | NM_007531:154       | Phb2       | INSIDE                 | 0.270                                           | 0.649                            | 854.19              | 554.53              | 0.175                            | 692.18              | 121.25              |
| A_68_P24808210 | chr6:122289199-122289250                          | NM_001042623:-2191  | Phc1       | PROMOTER               | 0.261                                           | 0.615                            | 853.00              | 524.41              | 0.161                            | 758.78              | 121.84              |
| A_68_P24808212 | chr6:122289513-122289557                          | NM_001042623:-2501  | Phc1       | PROMOTER               | 0.240                                           | 0.588                            | 3941.43             | 2316.93             | 0.141                            | 2493.67             | 351.46              |
| A_68_P23292280 | chr4:128331714-128331758                          | NM_001195130:-209   | Phc2       | PROMOTER               | 0.193                                           | 0.539                            | 1414.75             | 762.41              | 0.104                            | 1160.28             | 120.80              |
| A_68_P23292761 | chr4:128405549-128405608                          | NM_001195083:764    | Phc2       | INSIDE                 | 0.343                                           | 0.648                            | 904.44              | 586.46              | 0.222                            | 564.26              | 125.50              |
| A_68_P31113238 | chr17:27070074-27070118                           | NM_009343:25        | Phf1       | INSIDE                 | 0.580                                           | 0.473                            | 1647.89             | 778.89              | 0.274                            | 1296.92             | 355.43              |
| A_68_P31062916 | chr17:15097920-15097964                           | NM_024250:295       | Phf10      | INSIDE                 | 0.464                                           | 0.653                            | 6295.84             | 4112.61             | 0.303                            | 4914.93             | 1490.71             |
| A_68_P31062919 | chr17:15098706-15098750                           | NM_024250:-491      | Phf10      | PROMOTER               | 0.292                                           | 1.357                            | 6416.10             | 8704.67             | 0.397                            | 4682.72             | 1856.94             |
| A_68_P27940743 | chr11:77796384-77796428                           | NM_174852:89        | Phf12      | INSIDE                 | 0.396                                           | 0.423                            | 4734.44             | 2004.16             | 0.168                            | 3592.41             | 602.73              |
| A_68_P27940753 | chr11:77797545-77797589                           | NM_174852:1249      | Phf12      | INSIDE                 | 0.449                                           | 0.475                            | 1363.64             | 647.40              | 0.213                            | 995.82              | 212.38              |
| A_68_P23415879 | chr4:151368860-151368904                          | NM_172705:1406      | Phf13      | INSIDE                 | 0.118                                           | 0.591                            | 2449.97             | 1449.12             | 0.070                            | 1678.49             | 116.66              |
| A_68_P23415890 | chr4:151370343-151370387                          | NM_172705:-76       | Phf13      | PROMOTER               | 0.151                                           | 0.431                            | 2263.75             | 974.70              | 0.065                            | 1857.21             | 121.13              |
| A_68_P23415895 | chr4:151370916-151370960                          | NM_172705:-650      | Phf13      | PROMOTER               | 0.256                                           | 0.546                            | 1141.95             | 623.62              | 0.140                            | 837.73              | 117.06              |
| A_68_P27796178 | chr11:51669754-51669800                           | NM_199299:1207      | Phf15      | INSIDE                 | 0.215                                           | 1.880                            | 904.15              | 1700.07             | 0.404                            | 548.44              | 221.76              |
| A_68_P27796185 | chr11:51670574-51670621                           | NM_199299:386       | Phf15      | INSIDE                 | 0.122                                           | 0.697                            | 1875.77             | 1307.39             | 0.085                            | 1377.92             | 116.85              |
| A_68_P27796196 | chr11:51671860-51671916                           | NM_199299:-905      | Phf15      | PROMOTER               | 0.281                                           | 0.635                            | 916.81              | 581.81              | 0.179                            | 685.66              | 122.42              |
| A_68_P21769996 | chr2:156022460-156022504                          | NM_172674:100       | Phf20      | INSIDE                 | 0.274                                           | 0.405                            | 1428.89             | 578.54              | 0.111                            | 1123.25             | 124.64              |
| A_68_P30397289 | chr15:84684008-84684052                           | NM_001081166:2529   | Phf21b     | INSIDE                 | 0.574                                           | 0.711                            | 2450.67             | 1742.93             | 0.408                            | 1998.97             | 815.55              |
| A_68_P30397292 | chr15:84684469-84684513                           | NM_001081166:2069   | Phf21b     | INSIDE                 | 0.239                                           | 0.669                            | 978.25              | 654.78              | 0.160                            | 764.34              | 122.42              |
| A_68_P30397294 | chr15:84684736-84684780                           | NM_001081166:1801   | Phf21b     | INSIDE                 | 0.391                                           | 0.463                            | 1726.92             | 800.27              | 0.181                            | 1439.78             | 261.16              |
| A_68_P30397300 | chr15:84685696-84685740                           | NM_001081166:841    | Phf21b     | INSIDE                 | 0.161                                           | 1.372                            | 1438.57             | 1974.32             | 0.221                            | 931.51              | 205.95              |
| A_68_P30397302 | chr15:84685989-84686033                           | NM_001081166:549    | Phf21b     | INSIDE                 | 0.505                                           | 0.526                            | 1246.85             | 655.29              | 0.265                            | 978.96              | 259.70              |
| A_68_P30397310 | chr15:84686778-84686823                           | NM_001081166:-241   | Phf21b     | PROMOTER               | 0.483                                           | 0.691                            | 3869.34             | 2672.26             | 0.334                            | 2983.60             | 995.79              |
| A_68_P27898393 | chr11:69810295-69810339                           | NM_030064:1044      | Phf23      | INSIDE                 | 0.255                                           | 1.753                            | 3199.51             | 5608.95             | 0.446                            | 2134.93             | 952.71              |
| A_68_P29510753 | chr14:32064135-32064185                           | NM_027949:244       | Phf7       | INSIDE                 | 0.404                                           | 0.534                            | 960.26              | 513.16              | 0.216                            | 777.89              | 167.83              |
| A_68_P32569611 | chrX:99839237-99839281                            | NM_008832:327       | Phka1      | INSIDE                 | 0.056                                           | 2.794                            | 4375.23             | 12225.17            | 0.156                            | 1577.23             | 246.39              |
| A_68_P27449324 | chr10:110943649-110943693                         | NM_009344:329       | Phlda1     | INSIDE                 | 0.654                                           | 0.539                            | 1081.33             | 582.49              | 0.352                            | 903.72              | 318.26              |
| A_68_P25601371 | chr7:150687585-150687629                          | NM_009434:823       | Phlda2     | INSIDE                 | 0.305                                           | 0.640                            | 2217.40             | 1418.70             | 0.195                            | 1596.89             | 311.32              |
| A_68_P20641447 | chr1:137662511-137662555                          | NM_013750:-129      | Phlda3     | PROMOTER               | 0.194                                           | 1.773                            | 1946.44             | 3451.63             | 0.345                            | 1457.90             | 502.66              |
| A_68_P26469278 | chr9:44541688-44541732                            | NM_153537:1567      | Phldb1     | INSIDE                 | 0.309                                           | 1.578                            | 1314.26             | 2074.23             | 0.488                            | 966.00              | 471.28              |
| A_68_P26469281 | chr9:44542040-44542084                            | NM_153537:1215      | Phldb1     | INSIDE                 | 0.427                                           | 0.714                            | 4272.68             | 3050.03             | 0.305                            | 3273.45             | 998.91              |
| A_68_P26469282 | chr9:44542109-44542153                            | NM_153537:1147      | Phldb1     | INSIDE                 | 0.122                                           | 0.617                            | 2150.08             | 1326.41             | 0.075                            | 1559.08             | 117.66              |
| A_68_P30728923 | chr16:45844322-45844366                           | NM_153412:147       | Phldb2     | INSIDE                 | 0.168                                           | 0.559                            | 4648.33             | 2598.67             | 0.094                            | 3381.44             | 318.14              |

| ProbeName      | Target position of probe on CpG island microarray | TargetID           | GeneSymbol | CpG island Description | Ratio of relative methylation (TiO2-NP/Vehicle) | Sham group                       |                     |                     | TiO <sub>2</sub> -H group        |                     |                     |
|----------------|---------------------------------------------------|--------------------|------------|------------------------|-------------------------------------------------|----------------------------------|---------------------|---------------------|----------------------------------|---------------------|---------------------|
|                |                                                   |                    |            |                        |                                                 | Relative methylation (Cy-5/Cy-3) | Cy-3 signal (Input) | Cy-5 signal (MeDIP) | Relative methylation (Cy-5/Cy-3) | Cy-3 signal (Input) | Cy-5 signal (MeDIP) |
| A_68_P20506801 | chr1:108068058-108068102                          | NM_133821:-365     | Phlpp1     | PROMOTER               | 0.335                                           | 0.566                            | 2301.60             | 1302.82             | 0.190                            | 1736.91             | 329.71              |
| A_68_P20506802 | chr1:108068165-108068215                          | NM_133821:-255     | Phlpp1     | PROMOTER               | 0.283                                           | 0.571                            | 3301.60             | 1885.10             | 0.162                            | 2325.73             | 376.11              |
| A_68_P20506813 | chr1:108069803-108069847                          | NM_133821:1379     | Phlpp1     | INSIDE                 | 0.257                                           | 0.405                            | 1464.44             | 592.73              | 0.104                            | 1114.65             | 115.93              |
| A_68_P28041006 | chr1:95685266-95685311                            | NM_153104:-525     | Phospho1   | PROMOTER               | 0.275                                           | 0.550                            | 939.14              | 516.98              | 0.152                            | 796.29              | 120.65              |
| A_68_P28041049 | chr1:95691702-95691746                            | NM_153104:5911     | Phospho1   | INSIDE                 | 0.206                                           | 0.379                            | 1814.12             | 687.98              | 0.078                            | 1469.47             | 114.85              |
| A_68_P28041052 | chr1:95692092-95692136                            | NM_153104:6301     | Phospho1   | INSIDE                 | 0.458                                           | 0.647                            | 1197.54             | 774.64              | 0.296                            | 953.21              | 282.31              |
| A_68_P25375581 | chr7:108966881-108966925                          | NM_008887:76       | Phox2a     | INSIDE                 | 0.095                                           | 0.713                            | 2481.75             | 1769.57             | 0.068                            | 1898.03             | 128.44              |
| A_68_P25375584 | chr7:108967279-108967328                          | NM_008887:477      | Phox2a     | INSIDE                 | 0.222                                           | 3.232                            | 2387.91             | 7718.57             | 0.718                            | 1716.21             | 1232.01             |
| A_68_P25375613 | chr7:108970639-108970683                          | NM_008887:3834     | Phox2a     | INSIDE                 | 0.241                                           | 0.595                            | 947.93              | 564.05              | 0.143                            | 821.31              | 117.77              |
| A_68_P21073068 | chr2:25430283-25430334                            | NM_029293:83       | Phpt1      | INSIDE                 | 0.220                                           | 0.705                            | 2050.79             | 1446.58             | 0.155                            | 1397.62             | 216.77              |
| A_68_P25587561 | chr7:148414503-148414549                          | NM_001081118:-160  | Phrf1      | DIVERGENT_PROMOTER     | 0.234                                           | 0.675                            | 1003.84             | 677.39              | 0.158                            | 746.82              | 117.88              |
| A_68_P27230700 | chr10:70061466-70061510                           | NM_001162846:-5928 | Phyhipl    | PROMOTER               | 0.275                                           | 0.519                            | 1106.01             | 573.61              | 0.143                            | 910.16              | 129.83              |
| A_68_P31127302 | chr17:29459217-29459261                           | NM_023734:3412     | Pil6       | INSIDE                 | 0.555                                           | 2.465                            | 2975.74             | 7336.30             | 1.369                            | 1879.24             | 2572.35             |
| A_68_P31127304 | chr17:29459396-29459440                           | NM_023734:3592     | Pil6       | INSIDE                 | 0.664                                           | 3.213                            | 1425.74             | 4581.14             | 2.133                            | 1020.44             | 2176.48             |
| A_68_P31127333 | chr17:29463770-29463814                           | NM_023734:7966     | Pil6       | INSIDE                 | 0.298                                           | 0.554                            | 1109.54             | 614.43              | 0.165                            | 771.49              | 127.28              |
| A_68_P32118990 | chr19:42165379-42165423                           | NM_145501:476      | Pi4k2a     | INSIDE                 | 0.091                                           | 0.705                            | 3132.84             | 2209.61             | 0.064                            | 2332.25             | 149.57              |
| A_68_P32118992 | chr19:42165554-42165602                           | NM_145501:654      | Pi4k2a     | INSIDE                 | 0.359                                           | 0.670                            | 1833.56             | 1228.50             | 0.241                            | 1273.81             | 306.48              |
| A_68_P26573398 | chr9:62828411-62828455                            | NM_019663:254      | Pias1      | INSIDE                 | 0.652                                           | 0.686                            | 3303.73             | 2264.88             | 0.447                            | 2612.06             | 1167.71             |
| A_68_P26573403 | chr9:62828953-62828997                            | NM_019663:-288     | Pias1      | PROMOTER               | 0.237                                           | 0.442                            | 2496.30             | 1103.02             | 0.105                            | 2046.95             | 214.24              |
| A_68_P22350678 | chr3:96500622-96500667                            | NM_001165949:-354  | Pias3      | PROMOTER               | 0.260                                           | 0.490                            | 1885.22             | 923.57              | 0.127                            | 1452.62             | 185.08              |
| A_68_P27287756 | chr10:80616365-80616414                           | NM_021501:14076    | Pias4      | DOWNSTREAM             | 0.645                                           | 3.573                            | 1617.64             | 5780.39             | 2.304                            | 1166.31             | 2686.76             |
| A_68_P29841642 | chr14:99498547-99498591                           | NM_029454:-83      | Pibfl      | PROMOTER               | 0.222                                           | 0.601                            | 1780.94             | 1070.43             | 0.133                            | 1437.93             | 191.69              |
| A_68_P32798240 | chrX:160857773-160857818                          | NM_011081:77       | Piga       | INSIDE                 | 0.052                                           | 1.666                            | 3449.95             | 5746.86             | 0.086                            | 1373.40             | 118.01              |
| A_68_P32798241 | chrX:160857957-160858011                          | NM_011081:266      | Piga       | INSIDE                 | 0.102                                           | 1.457                            | 2146.44             | 3126.36             | 0.149                            | 807.01              | 120.17              |
| A_68_P23971131 | chr5:108741769-108741813                          | NM_001081234:-153  | Pigg       | PROMOTER               | 0.565                                           | 0.577                            | 1542.46             | 889.51              | 0.326                            | 1240.48             | 403.92              |
| A_68_P22652203 | chr3:152377356-152377400                          | NM_025662:315      | Pigk       | INSIDE                 | 0.326                                           | 0.501                            | 1096.58             | 549.24              | 0.163                            | 905.32              | 147.86              |
| A_68_P20832748 | chr1:174307013-174307057                          | NM_026234:373      | Pigm       | INSIDE                 | 0.297                                           | 0.667                            | 1648.01             | 1099.60             | 0.198                            | 1331.03             | 263.79              |
| A_68_P27942688 | chr11:78142334-78142378                           | NM_201406:433      | Pigs       | INSIDE                 | 0.239                                           | 0.704                            | 1187.31             | 835.77              | 0.168                            | 891.88              | 149.88              |
| A_68_P21818226 | chr2:164323071-164323115                          | NM_133779:68       | Pigt       | INSIDE                 | 0.388                                           | 0.636                            | 1906.00             | 1212.07             | 0.247                            | 1528.24             | 377.07              |
| A_68_P21818227 | chr2:164323199-164323243                          | NM_133779:196      | Pigt       | INSIDE                 | 0.503                                           | 0.627                            | 1939.02             | 1216.47             | 0.315                            | 1421.70             | 448.25              |
| A_68_P21818228 | chr2:164323274-164323322                          | NM_133779:274      | Pigt       | INSIDE                 | 0.232                                           | 0.474                            | 1533.57             | 726.45              | 0.110                            | 1144.52             | 125.71              |
| A_68_P24479722 | chr6:57642005-57642049                            | NM_025574:46       | Pigy       | INSIDE                 | 0.355                                           | 0.466                            | 1127.04             | 524.97              | 0.166                            | 982.62              | 162.68              |
| A_68_P30650142 | chr16:31933808-31933852                           | NM_172822:-106     | Pigz       | PROMOTER               | 0.463                                           | 0.582                            | 1865.83             | 1086.52             | 0.270                            | 1336.72             | 360.78              |
| A_68_P30650143 | chr16:31933937-31933981                           | NM_172822:22       | Pigz       | INSIDE                 | 0.282                                           | 0.517                            | 1181.84             | 610.58              | 0.146                            | 846.76              | 123.55              |
| A_68_P29274934 | chr13:102464406-102464450                         | NM_001024955:-1826 | Pik3r1     | PROMOTER               | 0.656                                           | 0.608                            | 966.97              | 588.13              | 0.399                            | 900.07              | 359.29              |
| A_68_P29275477 | chr13:102537731-102537775                         | NM_001077495:420   | Pik3r1     | INSIDE                 | 0.477                                           | 0.489                            | 1109.14             | 542.56              | 0.233                            | 910.65              | 212.37              |
| A_68_P29275481 | chr13:102538276-102538320                         | NM_001077495:-126  | Pik3r1     | PROMOTER               | 0.203                                           | 0.522                            | 2880.19             | 1503.99             | 0.106                            | 2349.49             | 248.86              |
| A_68_P25953920 | chr8:73293490-73293534                            | NM_008841:7099     | Pik3r2     | INSIDE                 | 0.349                                           | 0.679                            | 1182.80             | 803.20              | 0.237                            | 970.57              | 230.28              |
| A_68_P25953979 | chr8:73300434-73300478                            | NM_008841:155      | Pik3r2     | INSIDE                 | 0.355                                           | 0.389                            | 1578.56             | 614.04              | 0.138                            | 1324.32             | 183.13              |
| A_68_P23228358 | chr4:115894280-115894324                          | NM_181585:-216     | Pik3r3     | PROMOTER               | 0.154                                           | 0.481                            | 1913.43             | 920.52              | 0.074                            | 1611.99             | 119.44              |
| A_68_P23228359 | chr4:115894431-115894475                          | NM_181585:-66      | Pik3r3     | PROMOTER               | 0.365                                           | 0.529                            | 1566.05             | 829.17              | 0.193                            | 1213.12             | 234.41              |
| A_68_P31128228 | chr17:29627044-29627088                           | NM_008842:-923     | Pim1       | PROMOTER               | 0.318                                           | 0.649                            | 4174.97             | 2710.75             | 0.207                            | 2967.55             | 613.15              |
| A_68_P31128243 | chr17:29629131-29629176                           | NM_008842:1164     | Pim1       | INSIDE                 | 0.131                                           | 0.642                            | 1937.35             | 1244.54             | 0.084                            | 1438.02             | 120.82              |
| A_68_P30421714 | chr15:88692421-88692465                           | NM_145478:-181     | Pim3       | PROMOTER               | 0.110                                           | 0.545                            | 3841.18             | 2094.99             | 0.060                            | 2759.09             | 165.65              |



| ProbeName      | Target position of probe on CpG island microarray | TargetID           | GeneSymbol | CpG island Description | Ratio of relative methylation (TiO2-NP/Vehicle) | Sham group                       |                     |                     | TiO <sub>2</sub> -H group        |                     |                     |
|----------------|---------------------------------------------------|--------------------|------------|------------------------|-------------------------------------------------|----------------------------------|---------------------|---------------------|----------------------------------|---------------------|---------------------|
|                |                                                   |                    |            |                        |                                                 | Relative methylation (Cy-5/Cy-3) | Cy-3 signal (Input) | Cy-5 signal (MeDIP) | Relative methylation (Cy-5/Cy-3) | Cy-3 signal (Input) | Cy-5 signal (MeDIP) |
| A_68_P30421723 | chr15:88693456-88693500                           | NM_145478:855      | Pim3       | INSIDE                 | 0.640                                           | 0.693                            | 1434.73             | 994.80              | 0.444                            | 1103.85             | 489.91              |
| A_68_P28052462 | chr11:97605811-97605862                           | NM_054051:182      | Pip4k2b    | INSIDE                 | 0.238                                           | 0.493                            | 1477.68             | 728.81              | 0.117                            | 1019.80             | 119.71              |
| A_68_P28052466 | chr11:97606492-97606536                           | NM_054051:-496     | Pip4k2b    | PROMOTER               | 0.276                                           | 0.584                            | 2592.54             | 1514.05             | 0.161                            | 1842.31             | 297.34              |
| A_68_P22342239 | chr3:94910572-94910617                            | NM_008847:186      | Pip5k1a    | INSIDE                 | 0.243                                           | 0.663                            | 904.30              | 599.63              | 0.161                            | 732.92              | 118.25              |
| A_68_P22342241 | chr3:94910847-94910891                            | NM_008847:-88      | Pip5k1a    | DIVERGENT_PROMOTER     | 0.241                                           | 0.617                            | 967.92              | 596.73              | 0.148                            | 820.56              | 121.76              |
| A_68_P27288652 | chr10:80755895-80755939                           | NM_001146687:200   | Pip5k1c    | INSIDE                 | 0.485                                           | 0.427                            | 2716.23             | 1159.04             | 0.207                            | 2212.44             | 458.22              |
| A_68_P23585503 | chr5:33127970-33128014                            | NM_177298:283      | Pisd       | INSIDE                 | 0.192                                           | 0.467                            | 1687.07             | 787.39              | 0.089                            | 1325.96             | 118.62              |
| A_68_P23585505 | chr5:33128122-33128166                            | NM_177298:131      | Pisd       | INSIDE                 | 0.416                                           | 0.458                            | 1904.84             | 871.63              | 0.191                            | 1459.14             | 278.02              |
| A_68_P27926998 | chr11:75401820-75401864                           | NM_008850:233      | Pitpna     | INSIDE                 | 0.200                                           | 0.663                            | 1335.14             | 885.01              | 0.133                            | 1121.74             | 148.86              |
| A_68_P28107246 | chr11:107330411-107330455                         | NM_145823:1602     | Pitpnc1    | INSIDE                 | 0.272                                           | 0.588                            | 3975.75             | 2339.59             | 0.160                            | 3186.82             | 509.66              |
| A_68_P28107248 | chr11:107330701-107330745                         | NM_145823:1312     | Pitpnc1    | INSIDE                 | 0.141                                           | 0.532                            | 2114.44             | 1124.23             | 0.075                            | 1579.74             | 118.72              |
| A_68_P28107252 | chr11:107331040-107331084                         | NM_145823:972      | Pitpnc1    | INSIDE                 | 0.520                                           | 0.607                            | 2393.36             | 1453.50             | 0.316                            | 1967.44             | 621.57              |
| A_68_P28107255 | chr11:107331346-107331390                         | NM_145823:666      | Pitpnc1    | INSIDE                 | 0.408                                           | 0.658                            | 1864.59             | 1226.24             | 0.268                            | 1561.88             | 419.27              |
| A_68_P28107256 | chr11:107331453-107331497                         | NM_145823:560      | Pitpnc1    | INSIDE                 | 0.390                                           | 0.646                            | 918.10              | 592.76              | 0.252                            | 663.38              | 166.88              |
| A_68_P24059409 | chr5:124571234-124571278                          | NM_011256:95171    | Pitpnm2    | INSIDE                 | 0.628                                           | 3.626                            | 631.12              | 2288.74             | 2.276                            | 551.76              | 1255.76             |
| A_68_P24059427 | chr5:124573452-124573496                          | NM_011256:92953    | Pitpnm2    | INSIDE                 | 0.653                                           | 2.145                            | 1806.45             | 3873.94             | 1.401                            | 1175.89             | 1647.64             |
| A_68_P28802625 | chr13:6547192-6547238                             | NM_145131:-188     | Pitrm1     | PROMOTER               | 0.595                                           | 2.377                            | 6069.01             | 14426.27            | 1.415                            | 3902.82             | 5521.78             |
| A_68_P29057249 | chr13:55926961-55927005                           | NM_011097:5804     | Pitx1      | INSIDE                 | 0.278                                           | 0.626                            | 2167.75             | 1356.45             | 0.174                            | 1561.70             | 271.78              |
| A_68_P29057250 | chr13:55927065-55927109                           | NM_011097:5700     | Pitx1      | INSIDE                 | 0.271                                           | 0.589                            | 1041.08             | 612.90              | 0.160                            | 760.85              | 121.46              |
| A_68_P29057257 | chr13:55927883-55927927                           | NM_011097:4882     | Pitx1      | INSIDE                 | 0.279                                           | 0.664                            | 1735.85             | 1151.83             | 0.185                            | 1409.77             | 261.10              |
| A_68_P29057274 | chr13:55929838-55929882                           | NM_011097:2926     | Pitx1      | INSIDE                 | 0.246                                           | 0.515                            | 1751.44             | 902.75              | 0.127                            | 1017.60             | 129.18              |
| A_68_P29057276 | chr13:55930039-55930083                           | NM_011097:2726     | Pitx1      | INSIDE                 | 0.492                                           | 0.714                            | 2090.57             | 1493.64             | 0.352                            | 1604.25             | 564.22              |
| A_68_P29057299 | chr13:55932917-55932961                           | NM_011097:-152     | Pitx1      | PROMOTER               | 0.543                                           | 0.491                            | 1163.44             | 570.69              | 0.266                            | 928.53              | 247.14              |
| A_68_P29057342 | chr13:55937765-55937809                           | NM_011097:-5000    | Pitx1      | PROMOTER               | 0.186                                           | 0.583                            | 1825.86             | 1064.61             | 0.109                            | 1410.67             | 153.31              |
| A_68_P22518619 | chr3:128902745-128902789                          | NM_011098:-69      | Pitx2      | PROMOTER               | 0.265                                           | 0.629                            | 896.46              | 563.85              | 0.167                            | 737.64              | 122.95              |
| A_68_P22518620 | chr3:128902934-128902978                          | NM_001042504:115   | Pitx2      | INSIDE                 | 0.520                                           | 0.691                            | 2387.47             | 1650.08             | 0.359                            | 1963.44             | 705.65              |
| A_68_P22518658 | chr3:128907203-128907247                          | NM_001042502:-9630 | Pitx2      | PROMOTER               | 0.153                                           | 0.574                            | 1612.92             | 925.36              | 0.088                            | 1370.17             | 120.64              |
| A_68_P22518740 | chr3:128916656-128916700                          | NM_001042502:-176  | Pitx2      | PROMOTER               | 0.168                                           | 0.372                            | 2754.32             | 1024.02             | 0.062                            | 2008.37             | 125.52              |
| A_68_P22518744 | chr3:128917174-128917220                          | NM_001042502:342   | Pitx2      | INSIDE                 | 0.272                                           | 0.664                            | 1138.17             | 755.21              | 0.180                            | 885.98              | 159.89              |
| A_68_P22518745 | chr3:128917350-128917394                          | NM_001042502:518   | Pitx2      | INSIDE                 | 0.098                                           | 0.713                            | 2440.81             | 1739.12             | 0.070                            | 1670.43             | 116.53              |
| A_68_P22518747 | chr3:128917569-128917613                          | NM_001042502:736   | Pitx2      | INSIDE                 | 0.376                                           | 0.418                            | 1871.32             | 782.01              | 0.157                            | 1453.58             | 228.38              |
| A_68_P22518759 | chr3:128919062-128919106                          | NM_001042502:2230  | Pitx2      | INSIDE                 | 0.177                                           | 0.544                            | 2054.18             | 1116.66             | 0.096                            | 1399.82             | 134.47              |
| A_68_P22518783 | chr3:128921672-128921716                          | NM_001042502:4840  | Pitx2      | INSIDE                 | 0.600                                           | 0.588                            | 887.59              | 522.06              | 0.353                            | 736.64              | 259.96              |
| A_68_P32142233 | chr19:46210854-46210898                           | NM_008852:11939    | Pitx3      | INSIDE                 | 0.468                                           | 0.469                            | 2790.16             | 1308.54             | 0.219                            | 2201.20             | 483.12              |
| A_68_P32142236 | chr19:46211273-46211317                           | NM_008852:11521    | Pitx3      | INSIDE                 | 0.224                                           | 1.389                            | 2293.90             | 3186.51             | 0.311                            | 1545.80             | 480.40              |
| A_68_P32142240 | chr19:46211708-46211752                           | NM_008852:11085    | Pitx3      | INSIDE                 | 0.345                                           | 0.537                            | 1189.29             | 638.22              | 0.185                            | 973.75              | 180.21              |
| A_68_P32142306 | chr19:46221925-46221969                           | NM_008852:869      | Pitx3      | INSIDE                 | 0.241                                           | 0.402                            | 4293.47             | 1727.85             | 0.097                            | 3312.00             | 320.83              |
| A_68_P32142315 | chr19:46223136-46223180                           | NM_008852:-343     | Pitx3      | DIVERGENT_PROMOTER     | 0.239                                           | 0.409                            | 1947.09             | 796.59              | 0.098                            | 1441.84             | 140.82              |
| A_68_P32555654 | chrX:96665945-96665989                            | NM_001083110:108   | Pja1       | INSIDE                 | 0.270                                           | 1.528                            | 1401.52             | 2140.98             | 0.413                            | 586.99              | 242.14              |
| A_68_P31295068 | chr17:64681131-64681175                           | NM_001025309:71    | Pja2       | INSIDE                 | 0.510                                           | 0.442                            | 2533.20             | 1119.03             | 0.225                            | 2101.75             | 473.18              |
| A_68_P31295073 | chr17:64681710-64681754                           | NM_001025309:-509  | Pja2       | PROMOTER               | 0.310                                           | 0.447                            | 1995.51             | 892.86              | 0.139                            | 1482.72             | 205.45              |
| A_68_P31612701 | chr18:34569089-34569133                           | NM_001163004:34    | Pkd2l2     | INSIDE                 | 0.586                                           | 0.478                            | 1227.35             | 587.13              | 0.280                            | 1201.01             | 336.66              |
| A_68_P21928444 | chr3:7366471-7366516                              | NM_008862:-110     | Pkia       | PROMOTER               | 0.604                                           | 0.582                            | 1249.51             | 726.84              | 0.352                            | 978.78              | 344.14              |
| A_68_P21813660 | chr2:163484302-163484346                          | NM_001164053:131   | Pkig       | INSIDE                 | 0.477                                           | 0.560                            | 986.37              | 552.78              | 0.267                            | 905.78              | 242.04              |

| ProbeName      | Target position of probe on CpG island microarray | TargetID           | GeneSymbol | CpG island Description | Ratio of relative methylation (TiO2-NP/Vehicle) | Sham group                       |                     |                     | TiO <sub>2</sub> -H group        |                     |                     |
|----------------|---------------------------------------------------|--------------------|------------|------------------------|-------------------------------------------------|----------------------------------|---------------------|---------------------|----------------------------------|---------------------|---------------------|
|                |                                                   |                    |            |                        |                                                 | Relative methylation (Cy-5/Cy-3) | Cy-3 signal (Input) | Cy-5 signal (MeDIP) | Relative methylation (Cy-5/Cy-3) | Cy-3 signal (Input) | Cy-5 signal (MeDIP) |
| A_68_P26554636 | chr9:59505260-59505304                            | NM_011099:868      | Pkm2       | INSIDE                 | 0.257                                           | 0.623                            | 1228.93             | 765.27              | 0.160                            | 997.34              | 159.31              |
| A_68_P26554815 | chr9:59528234-59528278                            | NM_011099:23842    | Pkm2       | DOWNSTREAM             | 0.103                                           | 0.582                            | 2631.43             | 1531.54             | 0.060                            | 1948.29             | 117.21              |
| A_68_P26554816 | chr9:59528311-59528358                            | NM_011099:23920    | Pkm2       | DOWNSTREAM             | 0.167                                           | 0.386                            | 2290.30             | 885.07              | 0.065                            | 1808.73             | 116.99              |
| A_68_P31093271 | chr17:23863763-23863807                           | NM_023058:482      | Pkmyt1     | INSIDE                 | 0.261                                           | 0.619                            | 3258.03             | 2016.07             | 0.161                            | 2439.27             | 393.82              |
| A_68_P26016104 | chr8:86223190-86223234                            | NM_177262:-134     | Pkn1       | PROMOTER               | 0.499                                           | 0.574                            | 1098.93             | 630.83              | 0.286                            | 899.64              | 257.49              |
| A_68_P22593191 | chr3:142545216-142545260                          | NM_178654:-270     | Pkn2       | PROMOTER               | 0.590                                           | 0.365                            | 1598.84             | 582.80              | 0.215                            | 1338.37             | 287.70              |
| A_68_P31140479 | chr17:31701231-31701275                           | NM_016670:-465     | Pknx1      | PROMOTER               | 0.597                                           | 0.542                            | 1130.48             | 613.27              | 0.324                            | 828.28              | 268.31              |
| A_68_P26429011 | chr9:36953245-36953299                            | NM_001029838:1579  | Pknx2      | INSIDE                 | 0.338                                           | 0.468                            | 1242.53             | 581.44              | 0.158                            | 990.49              | 156.59              |
| A_68_P26429014 | chr9:36953463-36953512                            | NM_001029838:1364  | Pknx2      | INSIDE                 | 0.130                                           | 0.716                            | 1838.18             | 1316.95             | 0.093                            | 1397.56             | 130.05              |
| A_68_P20642548 | chr1:137815415-137815459                          | NM_019645:165      | Pkp1       | INSIDE                 | 0.231                                           | 0.496                            | 1469.62             | 729.61              | 0.115                            | 1129.56             | 129.38              |
| A_68_P20642549 | chr1:137815494-137815538                          | NM_019645:85       | Pkp1       | INSIDE                 | 0.207                                           | 0.556                            | 1379.07             | 766.37              | 0.115                            | 1012.58             | 116.56              |
| A_68_P20642550 | chr1:137815675-137815719                          | NM_019645:-95      | Pkp1       | PROMOTER               | 0.160                                           | 0.550                            | 3846.71             | 2116.20             | 0.088                            | 2820.11             | 247.88              |
| A_68_P20642552 | chr1:137815854-137815898                          | NM_019645:-275     | Pkp1       | PROMOTER               | 0.510                                           | 0.611                            | 2166.92             | 1323.26             | 0.311                            | 1704.79             | 530.71              |
| A_68_P22522614 | chr3:129581824-129581868                          | NM_183423:-2255    | Pla2g12a   | PROMOTER               | 0.500                                           | 1.369                            | 3800.75             | 5201.39             | 0.684                            | 2739.15             | 1873.33             |
| A_68_P30365773 | chr15:79158644-79158688                           | NM_001199023:135   | Pla2g6     | INSIDE                 | 0.258                                           | 0.677                            | 4985.11             | 3376.22             | 0.175                            | 3564.43             | 622.24              |
| A_68_P30365774 | chr15:79158797-79158841                           | NM_001199023:-17   | Pla2g6     | PROMOTER               | 0.372                                           | 0.609                            | 1039.23             | 633.31              | 0.227                            | 829.12              | 187.89              |
| A_68_P29480406 | chr14:26722448-26722492                           | NM_207229:-91      | Plac9      | PROMOTER               | 0.460                                           | 0.565                            | 3136.69             | 1773.15             | 0.260                            | 2624.34             | 681.90              |
| A_68_P29480407 | chr14:26722558-26722602                           | NM_207229:-201     | Plac9      | PROMOTER               | 0.281                                           | 0.690                            | 7465.52             | 5150.73             | 0.194                            | 6608.79             | 1282.54             |
| A_68_P24873768 | chr6:136610320-136610368                          | NM_025806:70       | Plbd1      | INSIDE                 | 0.183                                           | 0.594                            | 1276.49             | 757.71              | 0.109                            | 1089.98             | 118.30              |
| A_68_P28083253 | chr11:102941713-102941757                         | NM_152813:21238    | Plcd3      | INSIDE                 | 0.291                                           | 0.571                            | 954.33              | 545.03              | 0.166                            | 734.64              | 122.25              |
| A_68_P28083254 | chr11:102941888-102941932                         | NM_152813:21062    | Plcd3      | INSIDE                 | 0.281                                           | 0.719                            | 1777.53             | 1277.53             | 0.202                            | 1219.75             | 246.12              |
| A_68_P26203093 | chr8:120022311-120022355                          | NM_172285:142      | Pleg2      | INSIDE                 | 0.436                                           | 0.441                            | 1297.85             | 572.58              | 0.192                            | 1146.51             | 220.34              |
| A_68_P23435437 | chr4:154357997-154358041                          | NM_001113360:27075 | Plch2      | INSIDE                 | 0.192                                           | 1.597                            | 480.09              | 766.75              | 0.306                            | 444.58              | 136.23              |
| A_68_P20241613 | chr1:55463553-55463597                            | NM_001114663:785   | Plcl1      | INSIDE                 | 0.390                                           | 0.622                            | 819.18              | 509.57              | 0.243                            | 692.34              | 168.12              |
| A_68_P23977768 | chr5:110530421-110530465                          | NR_027665:865      | Plexd1     | INSIDE                 | 0.284                                           | 0.388                            | 1783.69             | 692.33              | 0.110                            | 1272.40             | 140.06              |
| A_68_P22014196 | chr3:27837925-27837969                            | NM_001164056:345   | Pld1       | INSIDE                 | 0.640                                           | 0.604                            | 1984.92             | 1198.54             | 0.386                            | 1581.36             | 610.92              |
| A_68_P27901224 | chr11:70353932-70353976                           | NM_008876:289      | Pld2       | INSIDE                 | 0.347                                           | 0.608                            | 2218.30             | 1348.45             | 0.211                            | 1849.13             | 390.19              |
| A_68_P27901225 | chr11:70354037-70354081                           | NM_008876:393      | Pld2       | INSIDE                 | 0.239                                           | 0.674                            | 1192.74             | 803.98              | 0.161                            | 959.31              | 154.27              |
| A_68_P20852905 | chr1:178205134-178205178                          | NM_176916:287      | Pld5       | INSIDE                 | 0.054                                           | 0.732                            | 4045.40             | 2961.82             | 0.039                            | 3061.41             | 120.17              |
| A_68_P20852906 | chr1:178205311-178205355                          | NM_176916:111      | Pld5       | INSIDE                 | 0.175                                           | 0.620                            | 3447.14             | 2137.91             | 0.109                            | 2578.68             | 280.07              |
| A_68_P30346620 | chr15:76012400-76012444                           | NM_201394:13718    | Plec       | INSIDE                 | 0.594                                           | 2.759                            | 550.95              | 1520.08             | 1.640                            | 466.16              | 764.39              |
| A_68_P30346763 | chr15:76028781-76028825                           | NM_201393:-163     | Plec       | PROMOTER               | 0.208                                           | 0.582                            | 1177.22             | 685.59              | 0.121                            | 1012.57             | 122.73              |
| A_68_P30346947 | chr15:76059642-76059686                           | NM_201385:263      | Plec       | INSIDE                 | 0.294                                           | 0.451                            | 1296.40             | 584.06              | 0.132                            | 922.68              | 122.12              |
| A_68_P30346951 | chr15:76060156-76060200                           | NM_201385:-251     | Plec       | PROMOTER               | 0.508                                           | 0.478                            | 1602.64             | 765.41              | 0.242                            | 1309.91             | 317.54              |
| A_68_P30346974 | chr15:76062654-76062698                           | NM_001163542:-868  | Plec       | PROMOTER               | 0.180                                           | 0.463                            | 1944.49             | 901.27              | 0.083                            | 1415.25             | 117.86              |
| A_68_P30346979 | chr15:76063160-76063204                           | NM_001163542:-1374 | Plec       | PROMOTER               | 0.237                                           | 0.575                            | 1117.57             | 642.64              | 0.136                            | 991.08              | 134.88              |
| A_68_P30346980 | chr15:76063274-76063318                           | NM_001163542:-1488 | Plec       | PROMOTER               | 0.356                                           | 0.316                            | 3643.12             | 1151.50             | 0.112                            | 2691.64             | 302.46              |
| A_68_P28566639 | chr12:80013104-80013148                           | NM_013738:-5201    | Plek2      | PROMOTER               | 0.249                                           | 0.622                            | 1004.53             | 624.80              | 0.155                            | 860.67              | 133.32              |
| A_68_P25725384 | chr8:26212812-26212856                            | NM_031257:-551     | Plekha2    | PROMOTER               | 0.412                                           | 0.703                            | 3332.86             | 2343.63             | 0.290                            | 2682.89             | 776.75              |
| A_68_P21351698 | chr2:76513834-76513878                            | NM_031256:485      | Plekha3    | INSIDE                 | 0.260                                           | 0.603                            | 1034.89             | 623.53              | 0.157                            | 927.69              | 145.59              |
| A_68_P25093689 | chr7:52793682-52793726                            | NM_148927:12005    | Plekha4    | INSIDE                 | 0.187                                           | 0.630                            | 1765.63             | 1112.17             | 0.118                            | 1337.90             | 157.64              |
| A_68_P25093690 | chr7:52793837-52793881                            | NM_148927:12159    | Plekha4    | INSIDE                 | 0.294                                           | 0.540                            | 1520.91             | 820.86              | 0.159                            | 1147.84             | 182.08              |
| A_68_P20140986 | chr1:34906861-34906905                            | NM_145516:79       | Plekha2    | INSIDE                 | 0.348                                           | 0.565                            | 3188.57             | 1800.24             | 0.196                            | 2510.90             | 493.37              |
| A_68_P22727582 | chr4:10935187-10935231                            | NM_175175:-442     | Plekha2    | PROMOTER               | 0.380                                           | 0.447                            | 1915.38             | 856.58              | 0.170                            | 1445.89             | 245.94              |

| ProbeName      | Target position of probe on CpG island microarray | TargetID           | GeneSymbol | CpG island Description | Ratio of relative methylation (TiO2-NP/Vehicle) | Sham group                       |                     |                     | TiO <sub>2</sub> -H group        |                     |                     |
|----------------|---------------------------------------------------|--------------------|------------|------------------------|-------------------------------------------------|----------------------------------|---------------------|---------------------|----------------------------------|---------------------|---------------------|
|                |                                                   |                    |            |                        |                                                 | Relative methylation (Cy-5/Cy-3) | Cy-3 signal (Input) | Cy-5 signal (MeDIP) | Relative methylation (Cy-5/Cy-3) | Cy-3 signal (Input) | Cy-5 signal (MeDIP) |
| A_68_P25021470 | chr7:29157527-29157571                            | NM_001083912:133   | Plekhh2    | INSIDE                 | 0.546                                           | 0.452                            | 1942.28             | 876.99              | 0.246                            | 1514.20             | 373.18              |
| A_68_P28072366 | chr11:101032330-101032374                         | NM_146030:264      | Plekhh3    | INSIDE                 | 0.115                                           | 0.623                            | 4359.82             | 2716.47             | 0.072                            | 3095.40             | 221.70              |
| A_68_P27285553 | chr10:80260510-80260554                           | NM_023900:839      | Plekhl1    | INSIDE                 | 0.454                                           | 0.603                            | 2912.80             | 1757.28             | 0.274                            | 2105.75             | 576.33              |
| A_68_P27285558 | chr10:80261134-80261187                           | NM_023900:211      | Plekhl1    | INSIDE                 | 0.173                                           | 0.625                            | 1549.63             | 967.88              | 0.108                            | 1119.19             | 120.71              |
| A_68_P23365306 | chr4:141219776-141219820                          | NM_001033150:232   | Plekhl2    | INSIDE                 | 0.525                                           | 0.343                            | 1595.14             | 546.53              | 0.180                            | 1260.13             | 226.86              |
| A_68_P29322931 | chr13:111185370-111185414                         | NM_152804:141      | Plk2       | INSIDE                 | 0.336                                           | 0.427                            | 1874.97             | 800.72              | 0.143                            | 1439.94             | 206.36              |
| A_68_P29322934 | chr13:111185727-111185771                         | NM_152804:497      | Plk2       | INSIDE                 | 0.231                                           | 0.658                            | 2584.00             | 1700.99             | 0.152                            | 1944.48             | 295.33              |
| A_68_P23232644 | chr4:116805889-116805940                          | NM_013807:643      | Plk3       | INSIDE                 | 0.098                                           | 1.433                            | 2102.86             | 3012.87             | 0.140                            | 1484.68             | 208.44              |
| A_68_P23232647 | chr4:116806257-116806301                          | NM_013807:279      | Plk3       | INSIDE                 | 0.320                                           | 0.519                            | 1158.08             | 600.85              | 0.166                            | 940.16              | 155.99              |
| A_68_P22081523 | chr3:40604233-40604277                            | NM_011495:382      | Plk4       | INSIDE                 | 0.245                                           | 0.572                            | 2379.25             | 1360.46             | 0.140                            | 2032.66             | 284.53              |
| A_68_P27282698 | chr10:79819083-79819127                           | NM_183152:-99      | Plk5       | DIVERGENT_PROMOTER     | 0.173                                           | 0.580                            | 1689.64             | 980.34              | 0.101                            | 1210.77             | 121.87              |
| A_68_P26079047 | chr8:97219704-97219748                            | NM_026385:416      | Plip       | INSIDE                 | 0.330                                           | 0.562                            | 2488.97             | 1399.13             | 0.186                            | 1934.41             | 359.31              |
| A_68_P26079048 | chr8:97219780-97219824                            | NM_026385:340      | Plip       | INSIDE                 | 0.177                                           | 0.477                            | 2353.33             | 1123.46             | 0.085                            | 1746.55             | 147.88              |
| A_68_P26727063 | chr9:92437135-92437179                            | NM_001142916:96    | Plod2      | INSIDE                 | 0.259                                           | 0.406                            | 1465.54             | 595.12              | 0.105                            | 1253.35             | 131.64              |
| A_68_P24123988 | chr5:137462758-137462802                          | NM_011962:-108     | Plod3      | PROMOTER               | 0.217                                           | 0.741                            | 3574.70             | 2648.17             | 0.161                            | 2601.49             | 418.05              |
| A_68_P24123992 | chr5:137463167-137463211                          | NM_011962:300      | Plod3      | INSIDE                 | 0.218                                           | 0.530                            | 1554.59             | 824.02              | 0.115                            | 1028.86             | 118.78              |
| A_68_P24123993 | chr5:137463233-137463277                          | NM_011962:366      | Plod3      | INSIDE                 | 0.474                                           | 0.553                            | 1095.74             | 606.16              | 0.262                            | 781.43              | 204.85              |
| A_68_P22282899 | chr3:82859431-82859475                            | NM_016784:-7       | Plrg1      | DIVERGENT_PROMOTER     | 0.580                                           | 0.691                            | 1792.03             | 1238.57             | 0.401                            | 1438.42             | 576.72              |
| A_68_P22282900 | chr3:82859514-82859558                            | NM_016784:77       | Plrg1      | INSIDE                 | 0.210                                           | 0.651                            | 1292.96             | 841.12              | 0.136                            | 912.32              | 124.39              |
| A_68_P21820163 | chr2:164683274-164683318                          | NM_011125:-88      | Pltp       | PROMOTER               | 0.215                                           | 0.543                            | 2459.64             | 1334.68             | 0.117                            | 1895.58             | 221.18              |
| A_68_P25957205 | chr8:74031894-74031938                            | NM_032398:3752     | Plvap      | INSIDE                 | 0.629                                           | 0.623                            | 2304.19             | 1436.26             | 0.392                            | 1844.09             | 722.71              |
| A_68_P25957206 | chr8:74031971-74032015                            | NM_032398:3676     | Plvap      | INSIDE                 | 0.462                                           | 0.617                            | 1776.78             | 1096.06             | 0.285                            | 1370.90             | 390.45              |
| A_68_P20956471 | chr1:196446176-196446220                          | NM_008882:176      | Plxna2     | INSIDE                 | 0.647                                           | 0.518                            | 2147.75             | 1112.04             | 0.335                            | 1680.28             | 562.98              |
| A_68_P20956472 | chr1:196446255-196446299                          | NM_008882:254      | Plxna2     | INSIDE                 | 0.298                                           | 0.634                            | 1595.91             | 1012.02             | 0.189                            | 1163.51             | 219.86              |
| A_68_P20956473 | chr1:196446359-196446403                          | NM_008882:358      | Plxna2     | INSIDE                 | 0.360                                           | 0.514                            | 1066.96             | 548.68              | 0.185                            | 944.67              | 175.10              |
| A_68_P26818269 | chr9:108998498-108998542                          | NM_172775:571      | Plxnb1     | INSIDE                 | 0.123                                           | 0.660                            | 2060.00             | 1360.27             | 0.081                            | 1481.71             | 120.42              |
| A_68_P30423566 | chr15:88991488-88991534                           | NM_001159521:12770 | Plxnb2     | INSIDE                 | 0.523                                           | 3.344                            | 930.56              | 3111.62             | 1.748                            | 714.34              | 1248.70             |
| A_68_P26546675 | chr9:58094820-58094867                            | NM_008884:2750     | Pml        | INSIDE                 | 0.406                                           | 0.442                            | 1835.96             | 811.92              | 0.180                            | 1371.08             | 246.26              |
| A_68_P27857781 | chr11:62946689-62946733                           | NM_008885:1699     | Pmp22      | INSIDE                 | 0.228                                           | 0.715                            | 2391.88             | 1709.08             | 0.163                            | 1719.60             | 280.20              |
| A_68_P21078344 | chr2:26245012-26245056                            | NM_173180:167      | Pmpca      | INSIDE                 | 0.258                                           | 0.683                            | 3723.02             | 2544.40             | 0.176                            | 2491.77             | 439.28              |
| A_68_P23527586 | chr5:21243231-21243275                            | NM_028431:275      | Pmpcb      | INSIDE                 | 0.420                                           | 0.735                            | 5394.70             | 3965.09             | 0.308                            | 3955.20             | 1219.56             |
| A_68_P24158565 | chr5:144671053-144671097                          | NM_008886:205      | Pms2       | INSIDE                 | 0.270                                           | 0.418                            | 1317.53             | 550.65              | 0.113                            | 1036.82             | 117.10              |
| A_68_P32464004 | chrX:70904998-70905042                            | NM_001199351:173   | Pnck       | INSIDE                 | 0.151                                           | 2.664                            | 9345.08             | 24897.50            | 0.401                            | 3853.71             | 1545.52             |
| A_68_P20347698 | chr1:74331582-74331626                            | NM_025580:-3       | Pnkd       | DIVERGENT_PROMOTER     | 0.575                                           | 0.566                            | 1536.65             | 870.03              | 0.325                            | 1145.16             | 372.56              |
| A_68_P25089727 | chr7:52112663-52112707                            | NM_021549:134      | Pnkp       | INSIDE                 | 0.249                                           | 0.428                            | 1476.56             | 631.94              | 0.106                            | 1097.26             | 116.85              |
| A_68_P29681978 | chr14:67528942-67528986                           | NM_175498:-1080    | Pnma2      | PROMOTER               | 0.579                                           | 0.659                            | 2916.67             | 1920.97             | 0.381                            | 2155.40             | 821.28              |
| A_68_P29681981 | chr14:67529271-67529315                           | NM_175498:-752     | Pnma2      | PROMOTER               | 0.635                                           | 0.474                            | 1667.09             | 790.64              | 0.301                            | 1256.84             | 378.67              |
| A_68_P24984095 | chr7:17530028-17530072                            | NM_001099636:20    | Pnmal2     | INSIDE                 | 0.521                                           | 0.651                            | 1539.60             | 1001.72             | 0.339                            | 1231.81             | 417.29              |
| A_68_P24984097 | chr7:17530264-17530308                            | NM_001099636:256   | Pnmal2     | INSIDE                 | 0.263                                           | 0.483                            | 1145.78             | 552.86              | 0.127                            | 970.38              | 123.37              |
| A_68_P24984112 | chr7:17532039-17532083                            | NM_001099636:2030  | Pnmal2     | INSIDE                 | 0.249                                           | 0.542                            | 1291.60             | 700.57              | 0.135                            | 1078.49             | 145.47              |
| A_68_P24984115 | chr7:17532440-17532484                            | NM_001099636:2432  | Pnmal2     | INSIDE                 | 0.200                                           | 0.503                            | 1456.66             | 732.44              | 0.101                            | 1171.19             | 117.94              |
| A_68_P28056108 | chr11:98248019-98248063                           | NM_008890:95       | Pnmt       | INSIDE                 | 0.605                                           | 0.728                            | 1962.01             | 1429.14             | 0.440                            | 1588.81             | 699.84              |
| A_68_P25614335 | chr8:3515288-3515332                              | NM_001122818:-73   | Pnpla6     | PROMOTER               | 0.479                                           | 0.619                            | 2298.49             | 1423.24             | 0.297                            | 1726.09             | 512.10              |
| A_68_P28397152 | chr12:45370530-45370574                           | NM_026164:412      | Pnpla8     | INSIDE                 | 0.166                                           | 0.655                            | 1701.23             | 1113.60             | 0.109                            | 1094.96             | 119.04              |

| ProbeName      | Target position of probe on CpG island microarray | TargetID          | GeneSymbol | CpG island Description | Ratio of relative methylation (TiO2-NP/Vehicle) | Sham group                       |                     |                     | TiO <sub>2</sub> -H group        |                     |                     |
|----------------|---------------------------------------------------|-------------------|------------|------------------------|-------------------------------------------------|----------------------------------|---------------------|---------------------|----------------------------------|---------------------|---------------------|
|                |                                                   |                   |            |                        |                                                 | Relative methylation (Cy-5/Cy-3) | Cy-3 signal (Input) | Cy-5 signal (MeDIP) | Relative methylation (Cy-5/Cy-3) | Cy-3 signal (Input) | Cy-5 signal (MeDIP) |
| A_68_P28397153 | chr12:45370604-45370657                           | NM_026164:490     | Pnpla8     | INSIDE                 | 0.157                                           | 0.609                            | 1835.36             | 1116.95             | 0.095                            | 1290.54             | 123.05              |
| A_68_P22825899 | chr4:33334854-33334898                            | NM_001033225:886  | Pnrc1      | INSIDE                 | 0.234                                           | 0.334                            | 2113.96             | 707.02              | 0.078                            | 1737.46             | 136.20              |
| A_68_P27385035 | chr10:98569435-98569486                           | NM_027740:-344    | Poc1b      | PROMOTER               | 0.320                                           | 0.651                            | 1178.64             | 767.44              | 0.208                            | 885.98              | 184.52              |
| A_68_P24624715 | chr6:88824256-88824300                            | NM_176973:-240    | Podxl2     | PROMOTER               | 0.253                                           | 1.524                            | 3710.00             | 5653.87             | 0.385                            | 2664.39             | 1026.48             |
| A_68_P22340913 | chr3:94641242-94641288                            | NM_001165948:-224 | Pogz       | PROMOTER               | 0.140                                           | 0.694                            | 2141.72             | 1485.92             | 0.097                            | 1462.10             | 141.58              |
| A_68_P32535129 | chrX:90877426-90877470                            | NM_008892:46      | Pola1      | INSIDE                 | 0.197                                           | 1.708                            | 1785.58             | 3049.75             | 0.337                            | 646.78              | 218.00              |
| A_68_P25088092 | chr7:51803991-51804035                            | NM_011131:173     | Pold1      | INSIDE                 | 0.159                                           | 0.697                            | 2838.95             | 1977.55             | 0.111                            | 1874.27             | 207.66              |
| A_68_P30386866 | chr15:82979570-82979614                           | NM_178627:174     | Poldip3    | INSIDE                 | 0.524                                           | 0.447                            | 1219.72             | 545.34              | 0.234                            | 986.78              | 231.29              |
| A_68_P22964956 | chr4:62185874-62185918                            | NM_021498:152     | Pole3      | INSIDE                 | 0.071                                           | 1.756                            | 4791.00             | 8414.54             | 0.125                            | 3104.51             | 389.18              |
| A_68_P25261269 | chr7:86610660-86610704                            | NM_017462:477     | Polg       | INSIDE                 | 0.526                                           | 0.352                            | 2361.12             | 829.94              | 0.185                            | 1736.33             | 321.23              |
| A_68_P31205623 | chr17:46339517-46339561                           | NM_030715:36      | Polh       | INSIDE                 | 0.629                                           | 0.670                            | 2337.58             | 1565.75             | 0.421                            | 1891.15             | 797.00              |
| A_68_P23592737 | chr5:34512192-34512236                            | NM_181857:-117    | Poln       | PROMOTER               | 0.103                                           | 0.682                            | 7047.68             | 4804.10             | 0.070                            | 4710.00             | 330.17              |
| A_68_P24538901 | chr6:71859383-71859431                            | NM_009088:360     | Polr1a     | INSIDE                 | 0.276                                           | 0.687                            | 1229.99             | 844.63              | 0.189                            | 871.66              | 165.02              |
| A_68_P21623005 | chr2:128926868-128926912                          | NM_009086:159     | Polr1b     | INSIDE                 | 0.540                                           | 0.619                            | 1011.25             | 626.33              | 0.334                            | 806.44              | 269.47              |
| A_68_P22880641 | chr4:45031688-45031732                            | NM_022811:214     | Polr1e     | INSIDE                 | 0.185                                           | 0.492                            | 1716.64             | 844.91              | 0.091                            | 1324.33             | 120.69              |
| A_68_P22880642 | chr4:45031769-45031813                            | NM_022811:294     | Polr1e     | INSIDE                 | 0.217                                           | 0.562                            | 1262.24             | 709.54              | 0.122                            | 958.42              | 116.91              |
| A_68_P23820897 | chr5:77739417-77739462                            | NM_153798:-69     | Polr2b     | DIVERGENT_PROMOTER     | 0.243                                           | 0.520                            | 1813.02             | 943.61              | 0.127                            | 1398.18             | 177.01              |
| A_68_P23820898 | chr5:77739527-77739571                            | NM_153798:40      | Polr2b     | INSIDE                 | 0.314                                           | 0.429                            | 1266.53             | 542.83              | 0.135                            | 898.13              | 120.83              |
| A_68_P23820901 | chr5:77739843-77739887                            | NM_153798:356     | Polr2b     | INSIDE                 | 0.397                                           | 0.647                            | 1612.02             | 1043.01             | 0.257                            | 1284.16             | 330.01              |
| A_68_P26079860 | chr8:97381962-97382011                            | NM_009090:637     | Polr2c     | INSIDE                 | 0.266                                           | 0.467                            | 1201.30             | 560.87              | 0.124                            | 927.62              | 115.20              |
| A_68_P25030468 | chr7:31017900-31017944                            | NM_027259:830     | Polr2i     | INSIDE                 | 0.340                                           | 0.513                            | 1782.34             | 914.06              | 0.174                            | 1180.51             | 205.75              |
| A_68_P25589079 | chr7:148660855-148660899                          | NM_025593:176     | Polr2l     | INSIDE                 | 0.326                                           | 1.338                            | 11219.53            | 15007.40            | 0.436                            | 8052.58             | 3511.85             |
| A_68_P22350868 | chr3:96531418-96531462                            | NM_028925:-78     | Polr3c     | DIVERGENT_PROMOTER     | 0.525                                           | 0.567                            | 1474.70             | 835.95              | 0.297                            | 1356.25             | 403.34              |
| A_68_P29701296 | chr14:70843268-70843313                           | NM_025945:-12     | Polr3d     | DIVERGENT_PROMOTER     | 0.407                                           | 0.631                            | 2190.63             | 1383.25             | 0.257                            | 1603.41             | 411.96              |
| A_68_P21707654 | chr2:144353449-144353493                          | NM_029763:-10     | Polr3f     | DIVERGENT_PROMOTER     | 0.515                                           | 0.383                            | 3800.11             | 1457.21             | 0.197                            | 3178.40             | 627.48              |
| A_68_P22350096 | chr3:96397949-96397993                            | NM_027241:111     | Polr3gl    | INSIDE                 | 0.526                                           | 0.538                            | 2987.97             | 1608.27             | 0.283                            | 1981.79             | 561.16              |
| A_68_P30380501 | chr15:81756859-81756907                           | NM_030229:-239    | Polr3h     | PROMOTER               | 0.300                                           | 0.498                            | 1063.02             | 529.56              | 0.150                            | 797.95              | 119.37              |
| A_68_P21913217 | chr2:181598855-181598899                          | NM_025901:-188    | Polr3k     | PROMOTER               | 0.366                                           | 0.499                            | 1025.36             | 511.73              | 0.183                            | 723.84              | 132.32              |
| A_68_P21913219 | chr2:181599054-181599098                          | NM_025901:12      | Polr3k     | INSIDE                 | 0.179                                           | 0.607                            | 1461.74             | 887.60              | 0.109                            | 1166.18             | 126.95              |
| A_68_P21913222 | chr2:181599335-181599379                          | NM_025901:292     | Polr3k     | INSIDE                 | 0.183                                           | 0.588                            | 1352.22             | 794.67              | 0.108                            | 1083.96             | 116.61              |
| A_68_P28197875 | chr12:3960097-3960141                             | NM_008895:5168    | Pome       | INSIDE                 | 0.439                                           | 0.486                            | 1905.28             | 926.48              | 0.213                            | 1632.12             | 348.09              |
| A_68_P28197876 | chr12:3960172-3960216                             | NM_008895:5244    | Pome       | INSIDE                 | 0.215                                           | 0.617                            | 1693.45             | 1044.97             | 0.132                            | 1304.22             | 172.63              |
| A_68_P28197877 | chr12:3960273-3960317                             | NM_008895:5344    | Pome       | INSIDE                 | 0.453                                           | 0.503                            | 2050.65             | 1031.25             | 0.228                            | 1527.45             | 347.64              |
| A_68_P24176163 | chr5:148672587-148672634                          | NM_025624:407     | Pomp       | INSIDE                 | 0.146                                           | 0.529                            | 2026.06             | 1071.92             | 0.077                            | 1571.59             | 121.26              |
| A_68_P24176178 | chr5:148674084-148674130                          | NM_025624:1903    | Pomp       | INSIDE                 | 0.650                                           | 2.514                            | 645.38              | 1622.69             | 1.635                            | 512.61              | 838.38              |
| A_68_P21114132 | chr2:32091883-32091928                            | NM_145145:-297    | Pomt1      | PROMOTER               | 0.165                                           | 0.584                            | 1824.95             | 1065.34             | 0.096                            | 1301.02             | 125.19              |
| A_68_P28614436 | chr12:88488867-88488911                           | NM_153415:-36     | Pomt2      | PROMOTER               | 0.278                                           | 0.508                            | 1893.67             | 961.70              | 0.141                            | 1559.62             | 220.35              |
| A_68_P24008582 | chr5:115688344-115688391                          | NM_026398:2508    | Pop5       | INSIDE                 | 0.217                                           | 0.659                            | 1079.88             | 711.64              | 0.143                            | 833.10              | 118.98              |
| A_68_P24126055 | chr5:137943429-137943477                          | NM_028753:205     | Pop7       | INSIDE                 | 0.424                                           | 0.637                            | 970.48              | 618.59              | 0.270                            | 965.90              | 261.13              |
| A_68_P24126056 | chr5:137943558-137943602                          | NM_028753:77      | Pop7       | INSIDE                 | 0.454                                           | 0.587                            | 983.88              | 578.02              | 0.267                            | 845.07              | 225.53              |
| A_68_P24117359 | chr5:136164594-136164638                          | NM_008898:-467    | Por        | PROMOTER               | 0.455                                           | 0.638                            | 1615.63             | 1031.25             | 0.291                            | 1284.71             | 373.31              |
| A_68_P24117365 | chr5:136165147-136165191                          | NM_008898:85      | Por        | INSIDE                 | 0.332                                           | 0.379                            | 3793.96             | 1439.74             | 0.126                            | 2873.72             | 362.20              |
| A_68_P32242263 | chrX:7783783-7783827                              | NM_016913:-153    | Poren      | PROMOTER               | 0.111                                           | 1.546                            | 2695.29             | 4165.80             | 0.172                            | 1037.07             | 178.63              |
| A_68_P31252241 | chr17:55851663-55851707                           | NM_028370:242     | Pot1b      | INSIDE                 | 0.078                                           | 0.678                            | 4114.54             | 2791.39             | 0.053                            | 2979.72             | 157.39              |

| ProbeName      | Target position of probe on CpG island microarray | TargetID           | GeneSymbol | CpG island Description | Ratio of relative methylation (TiO2-NP/Vehicle) | Sham group                       |                     |                     | TiO <sub>2</sub> -H group        |                     |                     |
|----------------|---------------------------------------------------|--------------------|------------|------------------------|-------------------------------------------------|----------------------------------|---------------------|---------------------|----------------------------------|---------------------|---------------------|
|                |                                                   |                    |            |                        |                                                 | Relative methylation (Cy-5/Cy-3) | Cy-3 signal (Input) | Cy-5 signal (MeDIP) | Relative methylation (Cy-5/Cy-3) | Cy-3 signal (Input) | Cy-5 signal (MeDIP) |
| A_68_P31252242 | chr17:55851800-55851847                           | NM_028370:103      | Pot1b      | INSIDE                 | 0.280                                           | 0.616                            | 2320.37             | 1429.39             | 0.173                            | 1799.85             | 310.91              |
| A_68_P31252243 | chr17:55851934-55851978                           | NM_028370:-30      | Pot1b      | PROMOTER               | 0.218                                           | 0.671                            | 919.36              | 616.51              | 0.146                            | 846.60              | 123.75              |
| A_68_P20797862 | chr1:167933482-167933526                          | NM_011137:-739     | Pou2f1     | PROMOTER               | 0.287                                           | 0.503                            | 2291.28             | 1152.49             | 0.144                            | 1791.86             | 258.47              |
| A_68_P23269520 | chr4:124335988-124336032                          | NM_011141:1122     | Pou3f1     | INSIDE                 | 0.263                                           | 0.410                            | 1436.85             | 589.49              | 0.108                            | 1120.14             | 120.65              |
| A_68_P23269524 | chr4:124336535-124336579                          | NM_011141:1668     | Pou3f1     | INSIDE                 | 0.515                                           | 0.447                            | 1919.96             | 858.72              | 0.230                            | 1485.26             | 341.83              |
| A_68_P22778417 | chr4:22404692-22404736                            | NM_008899:10564    | Pou3f2     | DOWNSTREAM             | 0.264                                           | 0.510                            | 1777.13             | 906.10              | 0.135                            | 1488.14             | 200.52              |
| A_68_P22778505 | chr4:22414595-22414639                            | NM_008899:662      | Pou3f2     | INSIDE                 | 0.157                                           | 1.647                            | 4813.48             | 7929.94             | 0.259                            | 3343.69             | 864.41              |
| A_68_P22778510 | chr4:22415241-22415285                            | NM_008899:16       | Pou3f2     | INSIDE                 | 0.582                                           | 0.557                            | 1936.78             | 1078.50             | 0.324                            | 1608.27             | 521.51              |
| A_68_P22778520 | chr4:22416842-22416887                            | NM_008899:-1586    | Pou3f2     | PROMOTER               | 0.444                                           | 0.539                            | 1130.02             | 609.17              | 0.240                            | 929.50              | 222.69              |
| A_68_P22778523 | chr4:22417085-22417134                            | NM_008899:-1831    | Pou3f2     | PROMOTER               | 0.167                                           | 0.506                            | 1795.29             | 908.22              | 0.084                            | 1394.05             | 117.56              |
| A_68_P22778525 | chr4:22417373-22417424                            | NM_008899:-2120    | Pou3f2     | PROMOTER               | 0.210                                           | 0.693                            | 1839.83             | 1275.14             | 0.145                            | 1322.69             | 192.24              |
| A_68_P20184671 | chr1:42754188-42754232                            | NM_008900:220      | Pou3f3     | INSIDE                 | 0.480                                           | 0.646                            | 959.00              | 619.22              | 0.310                            | 929.95              | 288.27              |
| A_68_P20184674 | chr1:42754743-42754787                            | NM_008900:774      | Pou3f3     | INSIDE                 | 0.613                                           | 0.631                            | 1701.20             | 1073.53             | 0.387                            | 1494.22             | 578.41              |
| A_68_P20184676 | chr1:42754950-42754994                            | NM_008900:982      | Pou3f3     | INSIDE                 | 0.384                                           | 0.530                            | 1020.23             | 540.91              | 0.204                            | 815.91              | 166.23              |
| A_68_P20184679 | chr1:42755285-42755329                            | NM_008900:1316     | Pou3f3     | INSIDE                 | 0.259                                           | 0.342                            | 1670.37             | 572.10              | 0.089                            | 1297.84             | 115.19              |
| A_68_P32598389 | chrX:108010047-108010091                          | NM_008901:265      | Pou3f4     | INSIDE                 | 0.044                                           | 5.620                            | 6802.72             | 38228.22            | 0.246                            | 2678.51             | 659.05              |
| A_68_P32598390 | chrX:108010197-108010241                          | NM_008901:415      | Pou3f4     | INSIDE                 | 0.207                                           | 1.766                            | 1988.11             | 3511.50             | 0.366                            | 770.87              | 282.44              |
| A_68_P25988740 | chr8:80959381-80959425                            | NM_138944:1149     | Pou4f2     | INSIDE                 | 0.099                                           | 2.163                            | 15337.40            | 33180.84            | 0.215                            | 9247.74             | 1985.87             |
| A_68_P25988742 | chr8:80959567-80959624                            | NM_138944:956      | Pou4f2     | INSIDE                 | 0.198                                           | 0.557                            | 1502.78             | 837.75              | 0.111                            | 1094.76             | 121.00              |
| A_68_P31655262 | chr18:42553965-42554009                           | NM_138945:-264     | Pou4f3     | PROMOTER               | 0.536                                           | 0.470                            | 2878.95             | 1352.84             | 0.252                            | 2437.99             | 614.19              |
| A_68_P31655264 | chr18:42554220-42554264                           | NM_138945:-8       | Pou4f3     | PROMOTER               | 0.248                                           | 0.516                            | 2157.75             | 1113.05             | 0.128                            | 1627.84             | 208.28              |
| A_68_P31655265 | chr18:42554339-42554383                           | NM_138945:110      | Pou4f3     | INSIDE                 | 0.306                                           | 0.476                            | 4057.89             | 1932.58             | 0.146                            | 2789.92             | 406.78              |
| A_68_P31655275 | chr18:42555427-42555471                           | NM_138945:1198     | Pou4f3     | INSIDE                 | 0.296                                           | 0.603                            | 906.72              | 546.45              | 0.179                            | 676.84              | 120.93              |
| A_68_P29336879 | chr13:113591191-113591235                         | NM_008903:82       | Ppap2a     | INSIDE                 | 0.346                                           | 0.400                            | 2048.00             | 818.63              | 0.138                            | 1487.73             | 205.49              |
| A_68_P23176982 | chr4:104830286-104830330                          | NM_080555:357      | Ppap2b     | INSIDE                 | 0.204                                           | 0.588                            | 2653.85             | 1560.48             | 0.120                            | 1893.15             | 226.67              |
| A_68_P27277400 | chr10:78996361-78996405                           | NM_015817:150      | Ppap2c     | INSIDE                 | 0.383                                           | 1.507                            | 11061.78            | 16667.18            | 0.577                            | 7272.18             | 4196.60             |
| A_68_P25514699 | chr7:136400655-136400699                          | NM_001080963:69    | Ppapdc1a   | INSIDE                 | 0.143                                           | 0.548                            | 1757.12             | 963.73              | 0.079                            | 1485.47             | 116.63              |
| A_68_P25728675 | chr8:26830785-26830829                            | NM_028000:287      | Ppapdc1b   | INSIDE                 | 0.161                                           | 0.576                            | 1848.70             | 1064.49             | 0.093                            | 1341.83             | 124.14              |
| A_68_P30402716 | chr15:85566360-85566404                           | NM_011144:177      | Ppara      | INSIDE                 | 0.448                                           | 0.641                            | 1474.90             | 945.52              | 0.287                            | 1247.55             | 358.42              |
| A_68_P24770497 | chr6:115311740-115311784                          | NM_001127330:524   | Pparg      | INSIDE                 | 0.505                                           | 0.586                            | 2380.61             | 1394.49             | 0.296                            | 1937.70             | 573.60              |
| A_68_P24770498 | chr6:115311955-115311999                          | NM_001127330:738   | Pparg      | INSIDE                 | 0.275                                           | 0.496                            | 1107.89             | 549.64              | 0.137                            | 905.46              | 123.74              |
| A_68_P31757530 | chr18:61558577-61558621                           | NM_133249:1487     | Ppargc1b   | INSIDE                 | 0.106                                           | 0.699                            | 3221.43             | 2251.85             | 0.074                            | 2165.58             | 160.16              |
| A_68_P31757537 | chr18:61559490-61559534                           | NM_133249:573      | Ppargc1b   | INSIDE                 | 0.341                                           | 0.406                            | 1984.91             | 805.32              | 0.138                            | 1502.22             | 207.54              |
| A_68_P21909033 | chr2:180922121-180922165                          | NM_025598:95       | Ppdpf      | INSIDE                 | 0.215                                           | 0.683                            | 2411.20             | 1648.05             | 0.147                            | 1744.28             | 256.12              |
| A_68_P21909038 | chr2:180922669-180922713                          | NM_025598:643      | Ppdpf      | INSIDE                 | 0.357                                           | 0.441                            | 1594.20             | 703.42              | 0.158                            | 1328.23             | 209.25              |
| A_68_P25607698 | chr7:151739256-151739302                          | NM_001033319:356   | Ppfia1     | INSIDE                 | 0.129                                           | 0.554                            | 2015.67             | 1117.52             | 0.071                            | 1612.47             | 115.05              |
| A_68_P25092648 | chr7:52616935-52616979                            | NM_029741:5433     | Ppfia3     | INSIDE                 | 0.647                                           | 0.546                            | 1744.66             | 952.09              | 0.353                            | 1343.74             | 474.37              |
| A_68_P20632576 | chr1:136195378-136195427                          | NM_001144855:34103 | Ppfia4     | INSIDE                 | 0.332                                           | 1.667                            | 1077.95             | 1797.29             | 0.554                            | 866.36              | 479.93              |
| A_68_P20632578 | chr1:136195654-136195698                          | NM_001144855:33829 | Ppfia4     | INSIDE                 | 0.396                                           | 0.708                            | 1305.46             | 924.84              | 0.281                            | 1092.82             | 306.60              |
| A_68_P20632580 | chr1:136195843-136195887                          | NM_001144855:33641 | Ppfia4     | INSIDE                 | 0.612                                           | 0.668                            | 1158.23             | 773.15              | 0.409                            | 951.89              | 388.86              |
| A_68_P20632581 | chr1:136195963-136196007                          | NM_001144855:33521 | Ppfia4     | INSIDE                 | 0.530                                           | 0.643                            | 2492.75             | 1602.60             | 0.341                            | 1852.97             | 631.25              |
| A_68_P24931167 | chr6:146837167-146837211                          | NM_001170433:173   | Ppfbp1     | INSIDE                 | 0.655                                           | 0.692                            | 2211.77             | 1530.32             | 0.453                            | 1846.75             | 836.77              |
| A_68_P27568393 | chr11:6315493-6315540                             | NM_008907:-356     | Ppia       | PROMOTER               | 0.168                                           | 0.679                            | 1431.78             | 972.87              | 0.114                            | 1044.41             | 119.53              |
| A_68_P27568396 | chr11:6315839-6315883                             | NM_008907:-12      | Ppia       | PROMOTER               | 0.416                                           | 0.551                            | 1712.42             | 943.39              | 0.229                            | 1413.81             | 323.65              |

| ProbeName      | Target position of probe on CpG island microarray | TargetID         | GeneSymbol  | CpG island Description | Ratio of relative methylation (TiO2-NP/Vehicle) | Sham group                       |                     |                     | TiO <sub>2</sub> -H group        |                     |                     |
|----------------|---------------------------------------------------|------------------|-------------|------------------------|-------------------------------------------------|----------------------------------|---------------------|---------------------|----------------------------------|---------------------|---------------------|
|                |                                                   |                  |             |                        |                                                 | Relative methylation (Cy-5/Cy-3) | Cy-3 signal (Input) | Cy-5 signal (MeDIP) | Relative methylation (Cy-5/Cy-3) | Cy-3 signal (Input) | Cy-5 signal (MeDIP) |
| A_68_P29479230 | chr14:26513644-26513688                           | NM_134084:11     | Ppif        | INSIDE                 | 0.195                                           | 0.482                            | 1816.19             | 875.31              | 0.094                            | 1342.43             | 126.31              |
| A_68_P31126966 | chr17:29400812-29400856                           | NM_026845:82     | Ppil1       | INSIDE                 | 0.456                                           | 0.638                            | 856.35              | 546.57              | 0.291                            | 691.51              | 201.38              |
| A_68_P20258949 | chr1:58502448-58502495                            | NM_027351:-141   | Ppil3       | DIVERGENT_PROMOTER     | 0.290                                           | 0.508                            | 1199.71             | 609.82              | 0.147                            | 786.45              | 115.84              |
| A_68_P26920793 | chr10:7512764-7512808                             | NM_026141:95     | Ppil4       | INSIDE                 | 0.537                                           | 0.520                            | 1395.72             | 725.17              | 0.279                            | 1023.24             | 285.45              |
| A_68_P20472798 | chr1:99666127-99666173                            | NM_173760:519    | Ppip5k2     | INSIDE                 | 0.269                                           | 0.477                            | 1076.17             | 513.79              | 0.128                            | 923.54              | 118.59              |
| A_68_P20472799 | chr1:99666240-99666284                            | NM_173760:407    | Ppip5k2     | INSIDE                 | 0.123                                           | 0.628                            | 2042.56             | 1281.87             | 0.077                            | 1514.72             | 117.17              |
| A_68_P30513991 | chr16:5132312-5132356                             | NM_008909:240    | Ppl         | INSIDE                 | 0.622                                           | 0.653                            | 5131.29             | 3349.38             | 0.406                            | 3921.83             | 1592.24             |
| A_68_P30513992 | chr16:5132390-5132436                             | NM_008909:162    | Ppl         | INSIDE                 | 0.282                                           | 0.468                            | 1156.38             | 540.83              | 0.132                            | 902.55              | 119.09              |
| A_68_P27982131 | chr11:85124251-85124295                           | NM_016910:-483   | Ppml d      | PROMOTER               | 0.394                                           | 0.440                            | 1279.88             | 563.48              | 0.173                            | 1059.51             | 183.63              |
| A_68_P27982135 | chr11:85124644-85124688                           | NM_016910:-89    | Ppml d      | PROMOTER               | 0.232                                           | 0.470                            | 1328.03             | 624.62              | 0.109                            | 1120.50             | 122.48              |
| A_68_P27982140 | chr11:85125306-85125350                           | NM_016910:573    | Ppml d      | INSIDE                 | 0.089                                           | 0.734                            | 2455.57             | 1802.06             | 0.066                            | 1804.02             | 118.41              |
| A_68_P27993894 | chr11:87171685-87171729                           | NM_177167:790    | Ppml e      | INSIDE                 | 0.329                                           | 0.528                            | 3696.59             | 1953.44             | 0.174                            | 2917.15             | 507.29              |
| A_68_P23577162 | chr5:31523190-31523234                            | NM_008014:-294   | Ppml g      | PROMOTER               | 0.273                                           | 0.517                            | 1770.88             | 914.90              | 0.141                            | 1231.46             | 173.56              |
| A_68_P27509905 | chr10:122115624-122115668                         | NM_176919:-171   | Ppml h      | PROMOTER               | 0.335                                           | 0.507                            | 1496.26             | 758.69              | 0.170                            | 1244.74             | 211.29              |
| A_68_P27509909 | chr10:122116007-122116051                         | NM_176919:211    | Ppml h      | INSIDE                 | 0.615                                           | 0.681                            | 1353.95             | 922.59              | 0.419                            | 1184.77             | 496.89              |
| A_68_P22393105 | chr3:104583807-104583851                          | NM_027982:-145   | Ppml j      | DIVERGENT_PROMOTER     | 0.293                                           | 0.463                            | 1284.55             | 594.17              | 0.135                            | 951.62              | 128.90              |
| A_68_P22393108 | chr3:104584185-104584229                          | NM_027982:233    | Ppml j      | INSIDE                 | 0.489                                           | 0.626                            | 2432.93             | 1522.23             | 0.306                            | 1881.45             | 575.45              |
| A_68_P22393113 | chr3:104584603-104584647                          | NM_027982:651    | Ppml j      | INSIDE                 | 0.630                                           | 0.655                            | 1650.21             | 1080.34             | 0.413                            | 1328.57             | 548.04              |
| A_68_P22220260 | chr3:69120137-69120181                            | NM_178726:-681   | Ppml i      | PROMOTER               | 0.658                                           | 0.580                            | 1565.18             | 907.78              | 0.382                            | 1400.32             | 534.54              |
| A_68_P22220267 | chr3:69120847-69120891                            | NM_178726:29     | Ppml i      | INSIDE                 | 0.434                                           | 0.545                            | 2515.36             | 1370.78             | 0.236                            | 1904.22             | 450.07              |
| A_68_P22220270 | chr3:69121308-69121352                            | NM_178726:491    | Ppml i      | INSIDE                 | 0.443                                           | 0.526                            | 1482.27             | 779.49              | 0.233                            | 1208.68             | 281.64              |
| A_68_P24992435 | chr7:19864459-19864503                            | NM_177691:918    | Ppml n      | INSIDE                 | 0.240                                           | 0.634                            | 2121.13             | 1345.56             | 0.152                            | 1615.66             | 246.37              |
| A_68_P25367283 | chr7:107520379-107520423                          | NM_028292:6      | Ppml e      | INSIDE                 | 0.192                                           | 0.673                            | 3551.19             | 2389.95             | 0.129                            | 2503.89             | 323.89              |
| A_68_P31921665 | chr19:4191850-4191903                             | NM_031868:-297   | Ppp1 e a    | DIVERGENT_PROMOTER     | 0.384                                           | 0.618                            | 906.79              | 560.73              | 0.238                            | 670.71              | 159.33              |
| A_68_P31921667 | chr19:4192216-4192260                             | NM_031868:65     | Ppp1 e a    | INSIDE                 | 0.409                                           | 0.625                            | 2319.46             | 1450.06             | 0.256                            | 1886.44             | 482.61              |
| A_68_P31921669 | chr19:4192588-4192632                             | NM_031868:437    | Ppp1 e a    | INSIDE                 | 0.248                                           | 0.333                            | 1914.53             | 638.15              | 0.083                            | 1396.65             | 115.60              |
| A_68_P24048830 | chr5:122607910-122607954                          | NM_013636:-355   | Ppp1 e c    | PROMOTER               | 0.242                                           | 0.542                            | 2194.06             | 1189.79             | 0.131                            | 1630.19             | 214.19              |
| A_68_P31161701 | chr17:36053710-36053754                           | NM_175934:-123   | Ppp1 r 10   | DIVERGENT_PROMOTER     | 0.353                                           | 0.690                            | 1629.09             | 1124.65             | 0.244                            | 1295.11             | 315.80              |
| A_68_P31161702 | chr17:36053831-36053875                           | NM_175934:-3     | Ppp1 r 10   | DIVERGENT_PROMOTER     | 0.569                                           | 0.672                            | 3400.04             | 2283.76             | 0.382                            | 2415.44             | 923.69              |
| A_68_P27430001 | chr10:107598764-107598808                         | NM_027892:-669   | Ppp1 r 12 a | PROMOTER               | 0.318                                           | 0.448                            | 3455.67             | 1549.30             | 0.143                            | 2476.59             | 353.05              |
| A_68_P27430005 | chr10:107599244-107599288                         | NM_027892:-189   | Ppp1 r 12 a | PROMOTER               | 0.345                                           | 0.445                            | 1358.46             | 604.42              | 0.153                            | 1248.57             | 191.50              |
| A_68_P31937055 | chr19:7048934-7048978                             | NM_008889:-581   | Ppp1 r 14 b | DIVERGENT_PROMOTER     | 0.141                                           | 0.712                            | 1970.00             | 1401.84             | 0.100                            | 1417.99             | 142.16              |
| A_68_P31937064 | chr19:7050018-7050063                             | NM_008889:503    | Ppp1 r 14 b | INSIDE                 | 0.244                                           | 0.593                            | 1205.82             | 714.66              | 0.144                            | 853.58              | 123.19              |
| A_68_P31937065 | chr19:7050107-7050153                             | NM_008889:593    | Ppp1 r 14 b | INSIDE                 | 0.206                                           | 0.620                            | 1412.19             | 875.28              | 0.128                            | 955.26              | 121.88              |
| A_68_P26918731 | chr10:6980219-6980263                             | NM_133485:151    | Ppp1 r 14 c | INSIDE                 | 0.194                                           | 0.696                            | 1819.25             | 1266.44             | 0.135                            | 1409.70             | 190.15              |
| A_68_P25093636 | chr7:52781291-52781335                            | NM_008654:326    | Ppp1 r 15 a | INSIDE                 | 0.494                                           | 0.592                            | 1683.46             | 996.36              | 0.292                            | 1416.98             | 414.25              |
| A_68_P25093637 | chr7:52781402-52781446                            | NM_008654:214    | Ppp1 r 15 a | INSIDE                 | 0.301                                           | 0.543                            | 1675.58             | 909.14              | 0.163                            | 1291.61             | 210.70              |
| A_68_P30349852 | chr15:76501941-76501985                           | NM_033371:-147   | Ppp1 r 16 a | DIVERGENT_PROMOTER     | 0.252                                           | 0.572                            | 917.75              | 525.14              | 0.144                            | 815.00              | 117.53              |
| A_68_P21784240 | chr2:158492976-158493020                          | NM_001159662:128 | Ppp1 r 16 b | INSIDE                 | 0.521                                           | 0.498                            | 1902.05             | 946.70              | 0.259                            | 1560.31             | 404.36              |
| A_68_P21784241 | chr2:158493133-158493177                          | NM_001159662:284 | Ppp1 r 16 b | INSIDE                 | 0.062                                           | 1.522                            | 5115.00             | 7784.87             | 0.095                            | 3433.40             | 324.83              |
| A_68_P28055832 | chr11:98209796-98209843                           | NM_144828:-232   | Ppp1 r 1 b  | PROMOTER               | 0.220                                           | 1.502                            | 2044.06             | 3070.04             | 0.330                            | 1364.32             | 449.94              |
| A_68_P28055835 | chr11:98210174-98210218                           | NM_144828:145    | Ppp1 r 1 b  | INSIDE                 | 0.415                                           | 0.626                            | 3132.75             | 1960.48             | 0.260                            | 2366.43             | 614.59              |
| A_68_P28055837 | chr11:98210403-98210447                           | NM_144828:373    | Ppp1 r 1 b  | INSIDE                 | 0.291                                           | 0.565                            | 4091.51             | 2311.88             | 0.164                            | 2917.39             | 479.12              |
| A_68_P28055838 | chr11:98210489-98210533                           | NM_144828:459    | Ppp1 r 1 b  | INSIDE                 | 0.614                                           | 0.536                            | 3461.83             | 1855.57             | 0.329                            | 2814.69             | 926.37              |

| ProbeName      | Target position of probe on CpG island microarray | TargetID           | GeneSymbol | CpG island Description | Ratio of relative methylation (TiO2-NP/Vehicle) | Sham group                       |                     |                     | TiO <sub>2</sub> -H group        |                     |                     |
|----------------|---------------------------------------------------|--------------------|------------|------------------------|-------------------------------------------------|----------------------------------|---------------------|---------------------|----------------------------------|---------------------|---------------------|
|                |                                                   |                    |            |                        |                                                 | Relative methylation (Cy-5/Cy-3) | Cy-3 signal (Input) | Cy-5 signal (MeDIP) | Relative methylation (Cy-5/Cy-3) | Cy-3 signal (Input) | Cy-5 signal (MeDIP) |
| A_68_P32238975 | chrX:7151016-7151060                              | NM_138605:208      | Ppp1r3f    | INSIDE                 | 0.222                                           | 2.207                            | 5680.18             | 12533.80            | 0.491                            | 2241.81             | 1100.11             |
| A_68_P32238979 | chrX:7151677-7151727                              | NM_138605:456      | Ppp1r3f    | DIVERGENT_PROMOTER     | 0.098                                           | 1.949                            | 2287.73             | 4458.78             | 0.191                            | 834.31              | 159.24              |
| A_68_P28946217 | chr13:36061405-36061450                           | NM_029628:1653     | Ppp1r3g    | INSIDE                 | 0.417                                           | 0.388                            | 1422.88             | 552.68              | 0.162                            | 1181.97             | 191.50              |
| A_68_P28035915 | chr11:94852120-94852164                           | NM_172261:-383     | Ppp1r9b    | PROMOTER               | 0.259                                           | 0.656                            | 2162.62             | 1419.34             | 0.170                            | 1618.29             | 275.48              |
| A_68_P31084397 | chr17:21082131-21082175                           | NM_016891:-265     | Ppp2r1a    | PROMOTER               | 0.244                                           | 0.565                            | 1103.92             | 623.25              | 0.138                            | 871.77              | 120.28              |
| A_68_P31084400 | chr17:21082518-21082562                           | NM_016891:123      | Ppp2r1a    | INSIDE                 | 0.251                                           | 0.523                            | 1275.90             | 667.73              | 0.131                            | 953.66              | 125.31              |
| A_68_P29682921 | chr14:67691110-67691154                           | NM_001205188:176   | Ppp2r2a    | INSIDE                 | 0.305                                           | 0.434                            | 5722.88             | 2483.43             | 0.132                            | 4602.45             | 608.34              |
| A_68_P23610087 | chr5:37260107-37260152                            | NM_172994:321      | Ppp2r2c    | INSIDE                 | 0.273                                           | 0.501                            | 1025.47             | 514.19              | 0.137                            | 886.49              | 121.48              |
| A_68_P23610088 | chr5:37260189-37260233                            | NM_172994:402      | Ppp2r2c    | INSIDE                 | 0.495                                           | 0.675                            | 1768.04             | 1193.35             | 0.334                            | 1317.65             | 440.50              |
| A_68_P23610099 | chr5:37261384-37261428                            | NM_172994:1598     | Ppp2r2c    | INSIDE                 | 0.339                                           | 0.521                            | 2486.87             | 1296.63             | 0.177                            | 1877.70             | 331.55              |
| A_68_P25574424 | chr7:146038574-146038618                          | NM_026391:528      | Ppp2r2d    | INSIDE                 | 0.287                                           | 0.623                            | 1761.29             | 1097.13             | 0.179                            | 1484.25             | 265.10              |
| A_68_P33012162 | chr9_random:55248-55292                           | NM_011154:-238     | Ppp2r3d    | PROMOTER               | 0.409                                           | 0.688                            | 1410.70             | 970.21              | 0.282                            | 1027.25             | 289.29              |
| A_68_P33012166 | chr9_random:55669-55721                           | NM_011154:-662     | Ppp2r3d    | PROMOTER               | 0.120                                           | 1.474                            | 3323.84             | 4900.44             | 0.177                            | 2200.93             | 388.78              |
| A_68_P21103105 | chr2:30272089-30272133                            | NM_138748:541      | Ppp2r4     | INSIDE                 | 0.406                                           | 0.636                            | 3968.58             | 2525.95             | 0.258                            | 2830.49             | 731.40              |
| A_68_P20937890 | chr11:193221506-193221550                         | NM_144880:-608     | Ppp2r5a    | PROMOTER               | 0.088                                           | 0.739                            | 2514.81             | 1859.29             | 0.065                            | 1834.82             | 119.50              |
| A_68_P28738223 | chr12:111685895-111685939                         | NM_001135001:528   | Ppp2r5c    | INSIDE                 | 0.453                                           | 0.484                            | 1922.49             | 930.95              | 0.219                            | 1473.75             | 323.19              |
| A_68_P28549414 | chr12:76696397-76696441                           | NM_012024:769      | Ppp2r5e    | INSIDE                 | 0.586                                           | 0.546                            | 1307.02             | 713.63              | 0.320                            | 1038.60             | 332.58              |
| A_68_P28549419 | chr12:76697049-76697093                           | NM_012024:117      | Ppp2r5e    | INSIDE                 | 0.481                                           | 0.664                            | 5537.38             | 3677.83             | 0.319                            | 3978.85             | 1271.15             |
| A_68_P28549421 | chr12:76697259-76697303                           | NM_012024:-93      | Ppp2r5e    | PROMOTER               | 0.536                                           | 0.576                            | 3414.71             | 1966.81             | 0.309                            | 2422.58             | 748.13              |
| A_68_P28549422 | chr12:76697372-76697416                           | NM_012024:-207     | Ppp2r5e    | PROMOTER               | 0.669                                           | 0.614                            | 4111.37             | 2525.91             | 0.411                            | 3356.09             | 1379.87             |
| A_68_P22558734 | chr3:136332458-136332502                          | NM_008913:-1253    | Ppp3ca     | PROMOTER               | 0.270                                           | 0.434                            | 2000.90             | 867.72              | 0.117                            | 1569.79             | 184.00              |
| A_68_P22558738 | chr3:136332932-136332976                          | NM_008913:-779     | Ppp3ca     | PROMOTER               | 0.638                                           | 0.400                            | 1495.87             | 597.87              | 0.255                            | 1261.42             | 321.47              |
| A_68_P22558741 | chr3:136333499-136333554                          | NM_008913:-207     | Ppp3ca     | PROMOTER               | 0.459                                           | 3.774                            | 706.40              | 2666.24             | 1.734                            | 568.58              | 985.80              |
| A_68_P22558744 | chr3:136333820-136333864                          | NM_008913:109      | Ppp3ca     | INSIDE                 | 0.323                                           | 0.507                            | 1318.47             | 668.10              | 0.164                            | 975.43              | 159.85              |
| A_68_P22558749 | chr3:136334580-136334624                          | NM_008913:869      | Ppp3ca     | INSIDE                 | 0.287                                           | 0.530                            | 2584.21             | 1369.02             | 0.152                            | 2083.54             | 316.64              |
| A_68_P25502251 | chr7:133935372-133935418                          | NM_019674:591      | Ppp4c      | INSIDE                 | 0.237                                           | 0.573                            | 1612.56             | 924.09              | 0.136                            | 1215.37             | 164.85              |
| A_68_P21870533 | chr2:173411101-173411145                          | NR_027957:73918    | Ppp4r11-ps | INSIDE                 | 0.271                                           | 0.517                            | 1178.09             | 608.66              | 0.140                            | 889.54              | 124.38              |
| A_68_P28698040 | chr12:104770943-104770987                         | NM_028980:190      | Ppp4r4     | INSIDE                 | 0.515                                           | 0.546                            | 2406.01             | 1314.29             | 0.281                            | 1969.38             | 553.65              |
| A_68_P31918147 | chr19:3575682-3575726                             | NM_001164159:45    | Ppp6r3     | INSIDE                 | 0.294                                           | 0.652                            | 4055.20             | 2645.44             | 0.192                            | 2867.08             | 549.30              |
| A_68_P30380961 | chr15:81846636-81846680                           | NM_134095:-88      | Pppde2     | DIVERGENT_PROMOTER     | 0.052                                           | 0.697                            | 7707.50             | 5372.11             | 0.036                            | 5343.73             | 194.99              |
| A_68_P32141864 | chr19:46131303-46131347                           | NM_001081214:296   | Ppre1      | INSIDE                 | 0.379                                           | 0.651                            | 3419.68             | 2226.53             | 0.247                            | 2531.00             | 624.54              |
| A_68_P32141867 | chr19:46131714-46131758                           | NM_001081214:708   | Ppre1      | INSIDE                 | 0.292                                           | 0.549                            | 3380.16             | 1854.29             | 0.160                            | 2755.75             | 441.96              |
| A_68_P24049493 | chr5:122735201-122735245                          | NM_177242:816      | Pptic7     | INSIDE                 | 0.269                                           | 0.579                            | 3182.05             | 1842.25             | 0.156                            | 2339.06             | 364.23              |
| A_68_P31863202 | chr18:80453578-80453622                           | NM_001164423:556   | Pqlc1      | INSIDE                 | 0.246                                           | 0.576                            | 1681.61             | 968.09              | 0.142                            | 1349.25             | 191.28              |
| A_68_P23351037 | chr4:138866350-138866394                          | NM_145384:243      | Pqlc2      | INSIDE                 | 0.438                                           | 0.452                            | 1914.53             | 864.68              | 0.198                            | 1516.22             | 299.80              |
| A_68_P23351038 | chr4:138866454-138866498                          | NM_145384:139      | Pqlc2      | INSIDE                 | 0.387                                           | 0.613                            | 1241.01             | 761.20              | 0.237                            | 955.93              | 226.87              |
| A_68_P25265835 | chr7:87439504-87439548                            | NM_145150:176      | Pre1       | INSIDE                 | 0.297                                           | 0.555                            | 1443.64             | 800.97              | 0.165                            | 1176.43             | 193.63              |
| A_68_P21432195 | chr2:92885557-92885608                            | NM_001177536:719   | Prdm11     | INSIDE                 | 0.442                                           | 0.339                            | 1532.01             | 519.27              | 0.150                            | 1208.33             | 180.83              |
| A_68_P21110347 | chr2:31491119-31491163                            | NM_001123362:-4416 | Prdm12     | PROMOTER               | 0.289                                           | 0.605                            | 2072.75             | 1254.06             | 0.175                            | 1628.91             | 285.24              |
| A_68_P21110351 | chr2:31491732-31491776                            | NM_001123362:-3802 | Prdm12     | PROMOTER               | 0.464                                           | 0.703                            | 1657.37             | 1165.20             | 0.326                            | 1360.18             | 443.40              |
| A_68_P21110355 | chr2:31492078-31492122                            | NM_001123362:-3456 | Prdm12     | PROMOTER               | 0.192                                           | 0.488                            | 1523.58             | 743.79              | 0.094                            | 1243.51             | 116.81              |
| A_68_P21110357 | chr2:31492430-31492474                            | NM_001123362:-3104 | Prdm12     | PROMOTER               | 0.167                                           | 0.396                            | 2719.63             | 1075.85             | 0.066                            | 1892.23             | 125.35              |
| A_68_P21110358 | chr2:31492494-31492545                            | NM_001123362:-3037 | Prdm12     | PROMOTER               | 0.219                                           | 0.655                            | 1499.15             | 981.63              | 0.143                            | 1196.84             | 171.26              |
| A_68_P21110359 | chr2:31492659-31492703                            | NM_001123362:-2876 | Prdm12     | PROMOTER               | 0.210                                           | 0.527                            | 1536.65             | 809.63              | 0.110                            | 1149.29             | 126.98              |

| ProbeName      | Target position of probe on CpG island microarray | TargetID           | GeneSymbol | CpG island Description | Ratio of relative methylation (TiO2-NP/Vehicle) | Sham group                       |                     |                     | TiO <sub>2</sub> -H group        |                     |                     |
|----------------|---------------------------------------------------|--------------------|------------|------------------------|-------------------------------------------------|----------------------------------|---------------------|---------------------|----------------------------------|---------------------|---------------------|
|                |                                                   |                    |            |                        |                                                 | Relative methylation (Cy-5/Cy-3) | Cy-3 signal (Input) | Cy-5 signal (MeDIP) | Relative methylation (Cy-5/Cy-3) | Cy-3 signal (Input) | Cy-5 signal (MeDIP) |
| A_68_P21110387 | chr2:31495883-31495927                            | NM_001123362:348   | Prdm12     | INSIDE                 | 0.623                                           | 0.525                            | 1190.86             | 625.01              | 0.327                            | 996.20              | 325.67              |
| A_68_P21110488 | chr2:31509792-31509836                            | NM_001123362:14258 | Prdm12     | INSIDE                 | 0.310                                           | 0.686                            | 2682.89             | 1840.93             | 0.213                            | 2519.68             | 535.54              |
| A_68_P22774390 | chr4:21616242-21616286                            | NM_001080771:-3154 | Prdm13     | PROMOTER               | 0.555                                           | 0.433                            | 1791.33             | 775.75              | 0.240                            | 1502.19             | 361.15              |
| A_68_P20039230 | chr1:13116543-13116587                            | NM_001081209:680   | Prdm14     | INSIDE                 | 0.402                                           | 0.572                            | 3613.44             | 2067.32             | 0.230                            | 2620.44             | 603.08              |
| A_68_P23433031 | chr4:154008979-154009030                          | NM_001177995:1978  | Prdm16     | INSIDE                 | 0.222                                           | 0.463                            | 1534.85             | 710.42              | 0.103                            | 1160.07             | 119.40              |
| A_68_P23433034 | chr4:154009287-154009331                          | NM_001177995:1674  | Prdm16     | INSIDE                 | 0.504                                           | 0.539                            | 2032.43             | 1095.75             | 0.271                            | 1647.95             | 447.39              |
| A_68_P23433035 | chr4:154009415-154009459                          | NM_001177995:1546  | Prdm16     | INSIDE                 | 0.218                                           | 0.516                            | 1439.28             | 742.62              | 0.112                            | 1070.32             | 120.25              |
| A_68_P23433043 | chr4:154010163-154010214                          | NM_001177995:794   | Prdm16     | INSIDE                 | 0.066                                           | 0.736                            | 3679.81             | 2707.03             | 0.048                            | 2470.24             | 119.77              |
| A_68_P23373719 | chr4:142751586-142751630                          | NM_001081355:51004 | Prdm2      | INSIDE                 | 0.414                                           | 0.600                            | 2265.89             | 1359.50             | 0.248                            | 1795.27             | 445.77              |
| A_68_P23374046 | chr4:142802052-142802101                          | NM_001081355:536   | Prdm2      | INSIDE                 | 0.356                                           | 0.623                            | 1062.06             | 661.45              | 0.222                            | 812.48              | 180.01              |
| A_68_P23374047 | chr4:142802126-142802170                          | NM_001081355:464   | Prdm2      | INSIDE                 | 0.463                                           | 0.452                            | 2303.49             | 1040.16             | 0.209                            | 1772.34             | 370.54              |
| A_68_P23374051 | chr4:142802693-142802737                          | NM_001081355:-102  | Prdm2      | PROMOTER               | 0.596                                           | 0.531                            | 1841.54             | 977.22              | 0.316                            | 1580.36             | 499.43              |
| A_68_P27311090 | chr10:85379118-85379174                           | NM_181650:544      | Prdm4      | INSIDE                 | 0.234                                           | 0.624                            | 1012.52             | 631.82              | 0.146                            | 816.68              | 119.27              |
| A_68_P27311093 | chr10:85379465-85379509                           | NM_181650:204      | Prdm4      | INSIDE                 | 0.364                                           | 0.420                            | 1790.11             | 751.12              | 0.153                            | 1539.97             | 235.30              |
| A_68_P31713373 | chr18:53622483-53622527                           | NM_001033281:-1695 | Prdm6      | PROMOTER               | 0.381                                           | 0.623                            | 1481.10             | 922.66              | 0.237                            | 1180.35             | 279.88              |
| A_68_P31713378 | chr18:53623569-53623613                           | NM_001033281:-609  | Prdm6      | PROMOTER               | 0.141                                           | 0.720                            | 1801.75             | 1296.47             | 0.101                            | 1308.97             | 132.57              |
| A_68_P31713386 | chr18:53624258-53624302                           | NM_001033281:81    | Prdm6      | INSIDE                 | 0.564                                           | 0.373                            | 2439.14             | 909.74              | 0.210                            | 1964.38             | 412.96              |
| A_68_P23916638 | chr5:98614079-98614123                            | NM_029947:4213     | Prdm8      | INSIDE                 | 0.423                                           | 0.666                            | 938.20              | 624.44              | 0.282                            | 770.31              | 217.06              |
| A_68_P23916648 | chr5:98615578-98615622                            | NM_029947:5713     | Prdm8      | INSIDE                 | 0.115                                           | 1.436                            | 3010.13             | 4323.03             | 0.165                            | 2076.03             | 343.14              |
| A_68_P23916649 | chr5:98615733-98615777                            | NM_029947:5867     | Prdm8      | INSIDE                 | 0.139                                           | 1.483                            | 5168.37             | 7663.67             | 0.206                            | 3478.63             | 718.01              |
| A_68_P31066337 | chr17:15701209-15701253                           | NM_144809:-943     | Prdm9      | PROMOTER               | 0.386                                           | 0.448                            | 1781.88             | 799.01              | 0.173                            | 1543.38             | 266.84              |
| A_68_P31066339 | chr17:15701385-15701429                           | NM_144809:-1119    | Prdm9      | PROMOTER               | 0.178                                           | 0.554                            | 1517.87             | 840.84              | 0.099                            | 1188.33             | 117.49              |
| A_68_P23230433 | chr4:116358143-116358188                          | NM_011034:-38      | Prdx1      | PROMOTER               | 0.215                                           | 0.514                            | 1789.23             | 919.01              | 0.110                            | 1275.88             | 140.81              |
| A_68_P26022893 | chr8:87493563-87493607                            | NM_011563:38       | Prdx2      | INSIDE                 | 0.132                                           | 0.692                            | 1815.95             | 1256.13             | 0.091                            | 1297.37             | 118.31              |
| A_68_P31936609 | chr19:6983898-6983942                             | NM_012021:215      | Prdx5      | INSIDE                 | 0.610                                           | 0.577                            | 1095.19             | 631.95              | 0.352                            | 840.94              | 295.98              |
| A_68_P31936610 | chr19:6984035-6984079                             | NM_012021:79       | Prdx5      | INSIDE                 | 0.258                                           | 0.530                            | 1234.11             | 654.53              | 0.137                            | 872.43              | 119.46              |
| A_68_P23575728 | chr5:31262393-31262437                            | NM_016703:320      | Preb       | INSIDE                 | 0.252                                           | 0.403                            | 2398.80             | 967.07              | 0.102                            | 1849.15             | 187.96              |
| A_68_P23575729 | chr5:31262539-31262583                            | NM_016703:174      | Preb       | INSIDE                 | 0.556                                           | 0.435                            | 1957.97             | 852.60              | 0.242                            | 1574.30             | 381.42              |
| A_68_P27109366 | chr10:44786725-44786769                           | NM_011156:-273     | Prep       | PROMOTER               | 0.469                                           | 0.630                            | 1146.19             | 722.10              | 0.295                            | 977.61              | 288.59              |
| A_68_P27110003 | chr10:44877999-44878045                           | NM_011156:91003    | Prep       | INSIDE                 | 0.666                                           | 2.654                            | 526.78              | 1397.88             | 1.768                            | 385.35              | 681.48              |
| A_68_P21831536 | chr2:166539405-166539449                          | NM_177782:-94      | Prex1      | PROMOTER               | 0.294                                           | 2.047                            | 14771.77            | 30234.45            | 0.602                            | 9815.80             | 5904.42             |
| A_68_P21831539 | chr2:166539726-166539770                          | NM_177782:-416     | Prex1      | PROMOTER               | 0.568                                           | 0.452                            | 1321.79             | 597.79              | 0.257                            | 1027.42             | 263.70              |
| A_68_P20029520 | chr1:10983953-10983997                            | NM_029525:429      | Prex2      | INSIDE                 | 0.562                                           | 0.439                            | 1493.77             | 655.96              | 0.247                            | 1230.28             | 303.83              |
| A_68_P30447264 | chr15:93331165-93331209                           | NM_001033217:95136 | Prickle1   | INSIDE                 | 0.466                                           | 1.561                            | 2699.48             | 4212.75             | 0.727                            | 2023.69             | 1470.26             |
| A_68_P30447393 | chr15:933350085-93350134                          | NM_001033217:76213 | Prickle1   | INSIDE                 | 0.304                                           | 0.582                            | 1032.40             | 600.49              | 0.177                            | 940.59              | 166.16              |
| A_68_P20134288 | chr1:33726517-33726564                            | NM_008922:63       | Prim2      | INSIDE                 | 0.608                                           | 0.507                            | 1021.62             | 518.28              | 0.308                            | 697.23              | 215.01              |
| A_68_P28696316 | chr12:104480086-104480133                         | NM_133364:247      | Prima1     | INSIDE                 | 0.119                                           | 1.830                            | 4927.57             | 9019.29             | 0.217                            | 3356.33             | 729.43              |
| A_68_P29982188 | chr15:5093945-5093989                             | NM_001013367:106   | Prkaa1     | INSIDE                 | 0.516                                           | 0.276                            | 2168.50             | 598.03              | 0.142                            | 1691.22             | 240.81              |
| A_68_P23176715 | chr4:104782702-104782746                          | NM_178143:-221     | Prkaa2     | PROMOTER               | 0.554                                           | 0.429                            | 2125.66             | 912.00              | 0.238                            | 1625.92             | 386.73              |
| A_68_P30476734 | chr15:98661277-98661332                           | NM_016781:635      | Prkag1     | INSIDE                 | 0.170                                           | 0.617                            | 1471.75             | 907.61              | 0.105                            | 1094.16             | 114.87              |
| A_68_P30476735 | chr15:98661367-98661411                           | NM_016781:551      | Prkag1     | INSIDE                 | 0.492                                           | 0.550                            | 1437.00             | 789.77              | 0.270                            | 1160.60             | 313.62              |
| A_68_P30476737 | chr15:98661589-98661633                           | NM_016781:329      | Prkag1     | INSIDE                 | 0.270                                           | 0.494                            | 1404.42             | 693.69              | 0.134                            | 975.81              | 130.30              |
| A_68_P23545730 | chr5:24605328-24605372                            | NM_145401:1110     | Prkag2     | INSIDE                 | 0.169                                           | 1.411                            | 1249.85             | 1763.50             | 0.238                            | 925.14              | 220.40              |
| A_68_P23545731 | chr5:24605464-24605510                            | NM_145401:974      | Prkag2     | INSIDE                 | 0.231                                           | 1.809                            | 2890.53             | 5229.58             | 0.418                            | 1905.40             | 795.52              |



| ProbeName      | Target position of probe on CpG island microarray | TargetID           | GeneSymbol | CpG island Description | Ratio of relative methylation (TiO2-NP/Vehicle) | Sham group                       |                     |                     | TiO <sub>2</sub> -H group        |                     |                     |
|----------------|---------------------------------------------------|--------------------|------------|------------------------|-------------------------------------------------|----------------------------------|---------------------|---------------------|----------------------------------|---------------------|---------------------|
|                |                                                   |                    |            |                        |                                                 | Relative methylation (Cy-5/Cy-3) | Cy-3 signal (Input) | Cy-5 signal (MeDIP) | Relative methylation (Cy-5/Cy-3) | Cy-3 signal (Input) | Cy-5 signal (MeDIP) |
| A_68_P23545735 | chr5:24605832-24605876                            | NM_145401:606      | Prkag2     | INSIDE                 | 0.193                                           | 0.495                            | 1571.63             | 777.85              | 0.095                            | 1228.51             | 117.24              |
| A_68_P20350233 | chr1:74795245-74795297                            | NM_153744:259      | Prkag3     | INSIDE                 | 0.312                                           | 1.415                            | 3788.79             | 5360.00             | 0.442                            | 2741.39             | 1211.94             |
| A_68_P28119819 | chr11:109511596-109511640                         | NM_021880:-644     | Prkar1a    | PROMOTER               | 0.573                                           | 0.538                            | 1105.98             | 594.70              | 0.308                            | 836.18              | 257.86              |
| A_68_P28119821 | chr11:109511777-109511821                         | NM_021880:-464     | Prkar1a    | PROMOTER               | 0.189                                           | 0.633                            | 1457.86             | 922.16              | 0.120                            | 974.94              | 116.81              |
| A_68_P28119824 | chr11:109512145-109512189                         | NM_021880:-96      | Prkar1a    | PROMOTER               | 0.280                                           | 0.460                            | 1170.83             | 538.40              | 0.129                            | 901.30              | 116.04              |
| A_68_P24133760 | chr5:139605384-139605428                          | NM_008923:300      | Prkar1b    | INSIDE                 | 0.136                                           | 0.574                            | 2248.19             | 1289.39             | 0.078                            | 1659.87             | 129.63              |
| A_68_P26816178 | chr9:108595255-108595302                          | NM_008924:805      | Prkar2a    | INSIDE                 | 0.491                                           | 0.645                            | 804.21              | 518.88              | 0.317                            | 700.23              | 222.05              |
| A_68_P28334786 | chr12:32745694-32745738                           | NM_011158:428      | Prkar2b    | INSIDE                 | 0.271                                           | 0.650                            | 1100.48             | 715.17              | 0.176                            | 804.41              | 141.51              |
| A_68_P28112590 | chr11:108204958-108205002                         | NM_011101:222      | Prkca      | INSIDE                 | 0.547                                           | 0.716                            | 1635.90             | 1170.74             | 0.391                            | 1247.44             | 488.36              |
| A_68_P29507007 | chr14:31438823-31438867                           | NM_011103:550      | Prkcd      | INSIDE                 | 0.629                                           | 2.446                            | 6147.13             | 15036.60            | 1.538                            | 3438.11             | 5286.19             |
| A_68_P31415134 | chr17:86566646-86566690                           | NM_011104:-456     | Prkce      | PROMOTER               | 0.254                                           | 0.623                            | 1912.25             | 1190.80             | 0.158                            | 1313.18             | 207.50              |
| A_68_P31415139 | chr17:86567438-86567482                           | NM_011104:336      | Prkce      | INSIDE                 | 0.239                                           | 0.696                            | 1353.34             | 941.55              | 0.167                            | 1035.38             | 172.52              |
| A_68_P31415145 | chr17:86568034-86568078                           | NM_011104:932      | Prkce      | INSIDE                 | 0.245                                           | 0.519                            | 1143.65             | 593.22              | 0.127                            | 926.35              | 117.61              |
| A_68_P31415146 | chr17:86568164-86568208                           | NM_011104:1062     | Prkce      | INSIDE                 | 0.529                                           | 0.635                            | 1508.75             | 957.50              | 0.336                            | 1104.97             | 370.74              |
| A_68_P22031194 | chr3:30894990-30895034                            | NM_008857:320      | Prkci      | INSIDE                 | 0.311                                           | 0.483                            | 2784.80             | 1344.04             | 0.150                            | 2328.63             | 348.98              |
| A_68_P22031195 | chr3:30895073-30895117                            | NM_008857:402      | Prkci      | INSIDE                 | 0.246                                           | 0.701                            | 4152.45             | 2909.57             | 0.172                            | 3217.84             | 554.14              |
| A_68_P21004674 | chr2:11093675-11093725                            | NM_008859:-308     | Prkcc      | PROMOTER               | 0.192                                           | 0.533                            | 1475.35             | 786.25              | 0.102                            | 1162.51             | 118.87              |
| A_68_P23438160 | chr4:154735910-154735954                          | NM_008860:-432     | Prkcz      | PROMOTER               | 0.285                                           | 0.346                            | 1560.54             | 540.03              | 0.099                            | 1188.92             | 117.20              |
| A_68_P28426163 | chr12:51750413-51750457                           | NM_008858:-224     | Prkd1      | PROMOTER               | 0.435                                           | 0.452                            | 1637.89             | 740.09              | 0.197                            | 1377.70             | 270.95              |
| A_68_P24983572 | chr7:17428015-17428059                            | NM_178900:-377     | Prkd2      | PROMOTER               | 0.456                                           | 0.494                            | 2352.31             | 1161.71             | 0.225                            | 1719.73             | 387.17              |
| A_68_P32066438 | chr19:31838454-31838498                           | NM_001013833:1047  | Prkg1      | INSIDE                 | 0.143                                           | 0.715                            | 1475.93             | 1054.89             | 0.102                            | 1131.58             | 115.42              |
| A_68_P21351535 | chr2:76485641-76485685                            | NM_011871:389      | Prkra      | INSIDE                 | 0.247                                           | 0.492                            | 1386.02             | 682.37              | 0.122                            | 1100.87             | 134.11              |
| A_68_P24119913 | chr5:136674484-136674528                          | NM_025774:318      | Prkrip1    | INSIDE                 | 0.205                                           | 0.674                            | 2938.19             | 1979.41             | 0.138                            | 2100.59             | 290.08              |
| A_68_P24119914 | chr5:136674559-136674603                          | NM_025774:244      | Prkrip1    | INSIDE                 | 0.559                                           | 0.609                            | 2183.08             | 1330.26             | 0.341                            | 1509.25             | 514.25              |
| A_68_P32479503 | chrX:75040859-75040905                            | NM_016979:417      | Prkx       | INSIDE                 | 0.088                                           | 1.916                            | 1957.16             | 3750.13             | 0.169                            | 710.61              | 120.44              |
| A_68_P32479506 | chrX:75041133-75041177                            | NM_016979:145      | Prkx       | INSIDE                 | 0.232                                           | 1.361                            | 2009.54             | 2735.05             | 0.316                            | 788.05              | 249.02              |
| A_68_P32225520 | chr19:60543550-60543594                           | NM_201615:635      | Prlhr      | INSIDE                 | 0.304                                           | 0.643                            | 1273.50             | 819.03              | 0.196                            | 1015.53             | 198.76              |
| A_68_P25090466 | chr7:52241494-52241538                            | NM_019830:186      | Prmt1      | INSIDE                 | 0.550                                           | 0.582                            | 2394.80             | 1392.61             | 0.320                            | 1757.31             | 561.92              |
| A_68_P25090472 | chr7:52242228-52242277                            | NM_019830:-550     | Prmt1      | PROMOTER               | 0.258                                           | 0.440                            | 1220.67             | 536.62              | 0.114                            | 1032.71             | 117.24              |
| A_68_P27260807 | chr10:75700398-75700442                           | NM_001077638:190   | Prmt2      | INSIDE                 | 0.083                                           | 0.601                            | 3581.04             | 2152.35             | 0.050                            | 2395.19             | 119.62              |
| A_68_P27260808 | chr10:75700481-75700530                           | NM_001077638:105   | Prmt2      | INSIDE                 | 0.272                                           | 0.594                            | 2200.79             | 1307.97             | 0.162                            | 1495.66             | 242.19              |
| A_68_P29612846 | chr14:55136095-55136139                           | NM_013768:191      | Prmt5      | INSIDE                 | 0.185                                           | 0.554                            | 1520.75             | 842.86              | 0.102                            | 1203.87             | 123.19              |
| A_68_P26138376 | chr8:108735052-108735096                          | NM_145404:121      | Prmt7      | INSIDE                 | 0.423                                           | 0.530                            | 1753.45             | 929.97              | 0.224                            | 1499.64             | 336.49              |
| A_68_P24834758 | chr6:127717838-127717882                          | NM_201371:887      | Prmt8      | INSIDE                 | 0.258                                           | 0.454                            | 1249.15             | 567.32              | 0.117                            | 1041.14             | 121.95              |
| A_68_P24834763 | chr6:127718286-127718330                          | NM_201371:439      | Prmt8      | INSIDE                 | 0.293                                           | 0.528                            | 1007.47             | 531.79              | 0.155                            | 788.32              | 122.03              |
| A_68_P24834768 | chr6:127718939-127718983                          | NM_201371:-213     | Prmt8      | PROMOTER               | 0.628                                           | 0.541                            | 1630.42             | 881.85              | 0.340                            | 1227.04             | 416.85              |
| A_68_P21637464 | chr2:131735522-131735570                          | NM_011170:-117     | Prnp       | PROMOTER               | 0.388                                           | 0.723                            | 1662.95             | 1202.84             | 0.280                            | 1338.97             | 375.41              |
| A_68_P21637466 | chr2:131735690-131735734                          | NM_011170:49       | Prnp       | INSIDE                 | 0.454                                           | 0.529                            | 1511.50             | 800.01              | 0.240                            | 1246.66             | 299.47              |
| A_68_P30577452 | chr16:18089136-18089180                           | NM_011172:125      | Prodh      | INSIDE                 | 0.339                                           | 0.406                            | 1428.07             | 579.57              | 0.138                            | 1030.07             | 141.71              |
| A_68_P24617030 | chr6:87540705-87540749                            | NM_021381:-31      | Prokr1     | PROMOTER               | 0.456                                           | 0.625                            | 3507.50             | 2192.63             | 0.285                            | 2620.70             | 747.45              |
| A_68_P21640034 | chr2:132210975-132211019                          | NM_144944:187      | Prokr2     | INSIDE                 | 0.347                                           | 0.605                            | 1847.94             | 1118.73             | 0.210                            | 1484.92             | 311.82              |
| A_68_P23649331 | chr5:44491778-44491823                            | NM_001163584:-5793 | Proml1     | PROMOTER               | 0.639                                           | 0.449                            | 2239.47             | 1004.57             | 0.286                            | 1784.79             | 511.32              |
| A_68_P21630920 | chr2:130468079-130468124                          | NM_197945:438      | Prosapip1  | INSIDE                 | 0.332                                           | 1.646                            | 1718.94             | 2829.56             | 0.546                            | 1116.46             | 609.97              |
| A_68_P25736232 | chr8:28153444-28153488                            | NM_001039077:440   | Prosc      | INSIDE                 | 0.580                                           | 0.637                            | 1710.49             | 1089.82             | 0.370                            | 1291.68             | 477.72              |

| ProbeName      | Target position of probe on CpG island microarray | TargetID           | GeneSymbol | CpG island Description | Ratio of relative methylation (TiO2-NP/Vehicle) | Sham group                       |                     |                     | TiO <sub>2</sub> -H group        |                     |                     |
|----------------|---------------------------------------------------|--------------------|------------|------------------------|-------------------------------------------------|----------------------------------|---------------------|---------------------|----------------------------------|---------------------|---------------------|
|                |                                                   |                    |            |                        |                                                 | Relative methylation (Cy-5/Cy-3) | Cy-3 signal (Input) | Cy-5 signal (MeDIP) | Relative methylation (Cy-5/Cy-3) | Cy-3 signal (Input) | Cy-5 signal (MeDIP) |
| A_68_P22346028 | chr3:95659528-95659572                            | NM_027541:126      | Prpf3      | INSIDE                 | 0.387                                           | 0.590                            | 2572.21             | 1516.67             | 0.228                            | 1976.81             | 451.55              |
| A_68_P24946434 | chr7:3581622-3581669                              | NM_001159714:59    | Prpf31     | INSIDE                 | 0.284                                           | 0.510                            | 1092.30             | 557.24              | 0.145                            | 808.75              | 117.27              |
| A_68_P23196701 | chr4:108251917-108251961                          | NM_172697:3        | Prpf38a    | INSIDE                 | 0.111                                           | 0.589                            | 2768.15             | 1630.15             | 0.065                            | 2036.75             | 133.26              |
| A_68_P28940997 | chr13:34966103-34966147                           | NM_013830:-1238    | Prpf4b     | PROMOTER               | 0.334                                           | 0.645                            | 834.93              | 538.32              | 0.216                            | 691.14              | 148.99              |
| A_68_P28940998 | chr13:34966207-34966251                           | NM_013830:-1134    | Prpf4b     | PROMOTER               | 0.295                                           | 0.510                            | 3080.41             | 1569.79             | 0.150                            | 2126.73             | 319.29              |
| A_68_P28941006 | chr13:34967366-34967410                           | NM_013830:26       | Prpf4b     | INSIDE                 | 0.267                                           | 0.446                            | 1303.47             | 581.96              | 0.119                            | 1031.54             | 123.01              |
| A_68_P21911590 | chr2:181335967-181336011                          | NM_133701:-35      | Prpf6      | DIVERGENT_PROMOTER     | 0.487                                           | 0.665                            | 1374.26             | 913.55              | 0.324                            | 983.56              | 318.63              |
| A_68_P30477985 | chr15:98885628-98885672                           | NM_001163588:46    | Prph       | INSIDE                 | 0.432                                           | 0.736                            | 3231.96             | 2379.82             | 0.318                            | 2337.44             | 743.16              |
| A_68_P32699217 | chrX:136991521-136991565                          | NM_021463:401      | Prps1      | INSIDE                 | 0.091                                           | 1.930                            | 2446.42             | 4721.17             | 0.176                            | 954.07              | 168.25              |
| A_68_P32699218 | chrX:136991656-136991701                          | NM_021463:537      | Prps1      | INSIDE                 | 0.132                                           | 1.782                            | 2722.01             | 4849.49             | 0.235                            | 1221.70             | 286.79              |
| A_68_P32699219 | chrX:136991758-136991802                          | NM_021463:639      | Prps1      | INSIDE                 | 0.123                                           | 1.590                            | 2272.75             | 3614.55             | 0.195                            | 864.05              | 168.70              |
| A_68_P28159660 | chr11:116351347-116351391                         | NM_026364:292      | Prpsap1    | INSIDE                 | 0.419                                           | 0.654                            | 1739.53             | 1136.92             | 0.274                            | 1497.75             | 409.90              |
| A_68_P24462649 | chr6:54277015-54277059                            | NM_030024:31       | Prr15      | INSIDE                 | 0.474                                           | 0.460                            | 1777.85             | 817.43              | 0.218                            | 1426.55             | 311.18              |
| A_68_P31701194 | chr18:51277202-51277246                           | NM_001081224:-327  | Prr16      | PROMOTER               | 0.262                                           | 0.422                            | 2592.04             | 1093.66             | 0.111                            | 1981.48             | 219.32              |
| A_68_P32957124 | chr17:8533875-8533919                             | NM_178774:293      | Prr18      | INSIDE                 | 0.178                                           | 0.444                            | 1898.57             | 842.57              | 0.079                            | 1453.11             | 114.99              |
| A_68_P32957129 | chr17:8534343-8534387                             | NM_178774:761      | Prr18      | INSIDE                 | 0.518                                           | 0.626                            | 1114.38             | 697.44              | 0.324                            | 1032.46             | 334.91              |
| A_68_P24980575 | chr7:16858057-16858101                            | NM_001136270:963   | Prr24      | INSIDE                 | 0.523                                           | 0.678                            | 1582.48             | 1072.73             | 0.354                            | 1159.31             | 410.80              |
| A_68_P24980579 | chr7:16858527-16858571                            | NM_001136270:493   | Prr24      | INSIDE                 | 0.267                                           | 0.639                            | 11345.83            | 7252.67             | 0.171                            | 7850.37             | 1341.64             |
| A_68_P24980582 | chr7:16858850-16858896                            | NM_001136270:169   | Prr24      | INSIDE                 | 0.526                                           | 3.083                            | 7046.42             | 21723.01            | 1.620                            | 4740.82             | 7681.36             |
| A_68_P31162035 | chr17:36116527-36116571                           | NM_145487:-136     | Prr3       | PROMOTER               | 0.274                                           | 0.516                            | 2389.16             | 1231.91             | 0.141                            | 1976.97             | 279.50              |
| A_68_P30396225 | chr15:84511839-84511883                           | NM_146061:433      | Prr5       | INSIDE                 | 0.510                                           | 0.501                            | 2069.43             | 1036.24             | 0.255                            | 1674.23             | 427.60              |
| A_68_P21473125 | chr2:101636609-101636660                          | NM_001083810:1230  | Prr51      | INSIDE                 | 0.205                                           | 0.639                            | 1193.94             | 763.32              | 0.131                            | 910.97              | 119.39              |
| A_68_P21473128 | chr2:101637014-101637058                          | NM_001083810:828   | Prr51      | INSIDE                 | 0.541                                           | 0.708                            | 2475.47             | 1753.79             | 0.383                            | 1980.21             | 759.31              |
| A_68_P29055170 | chr13:55565739-55565783                           | NM_001030296:133   | Prr7       | INSIDE                 | 0.652                                           | 0.555                            | 1054.47             | 585.21              | 0.362                            | 875.87              | 317.12              |
| A_68_P29055175 | chr13:55566226-55566270                           | NM_001030296:621   | Prr7       | INSIDE                 | 0.413                                           | 0.641                            | 997.70              | 639.06              | 0.265                            | 859.80              | 227.64              |
| A_68_P31735610 | chr18:57514422-57514466                           | NM_028447:58       | Prrc1      | INSIDE                 | 0.428                                           | 0.533                            | 3461.36             | 1846.17             | 0.228                            | 2669.48             | 609.54              |
| A_68_P31158044 | chr17:35302111-35302155                           | NM_001199044:-310  | Prrc2a     | PROMOTER               | 0.220                                           | 0.658                            | 2606.73             | 1714.01             | 0.145                            | 1756.43             | 253.85              |
| A_68_P32481889 | chrX:75828853-75828902                            | NM_001164275:244   | Prrg1      | INSIDE                 | 0.136                                           | 1.555                            | 1385.57             | 2154.44             | 0.212                            | 576.68              | 122.29              |
| A_68_P32481890 | chrX:75828993-75829037                            | NM_001164275:107   | Prrg1      | INSIDE                 | 0.059                                           | 1.411                            | 4045.61             | 5706.80             | 0.083                            | 1508.92             | 125.58              |
| A_68_P25090923 | chr7:52309399-52309443                            | NM_022999:7602     | Prrg2      | INSIDE                 | 0.211                                           | 0.414                            | 2016.49             | 834.08              | 0.087                            | 1331.76             | 116.05              |
| A_68_P25090924 | chr7:52309475-52309519                            | NM_022999:7526     | Prrg2      | INSIDE                 | 0.334                                           | 0.547                            | 1987.85             | 1086.59             | 0.182                            | 1528.63             | 278.69              |
| A_68_P32456129 | chrX:69208413-69208457                            | NM_001081135:75    | Prrg3      | INSIDE                 | 0.101                                           | 2.052                            | 2479.58             | 5089.18             | 0.208                            | 973.52              | 202.13              |
| A_68_P31154934 | chr17:34767881-34767925                           | NM_030890:1272     | Prrt1      | INSIDE                 | 0.148                                           | 0.432                            | 5022.36             | 2168.37             | 0.064                            | 3732.73             | 239.24              |
| A_68_P31154945 | chr17:34769052-34769096                           | NM_030890:2444     | Prrt1      | INSIDE                 | 0.419                                           | 0.664                            | 859.65              | 571.17              | 0.279                            | 659.58              | 183.75              |
| A_68_P20782631 | chr11:165242518-165242562                         | NM_011127:1241     | Prrx1      | INSIDE                 | 0.503                                           | 0.648                            | 2463.38             | 1597.12             | 0.326                            | 1983.37             | 647.09              |
| A_68_P21105567 | chr2:30701245-30701289                            | NM_009116:380      | Prrx2      | INSIDE                 | 0.487                                           | 0.536                            | 1063.78             | 569.84              | 0.261                            | 841.23              | 219.68              |
| A_68_P22488128 | chr3:123149644-123149696                          | NM_008939:-160     | Prss12     | PROMOTER               | 0.184                                           | 0.674                            | 1356.81             | 913.87              | 0.124                            | 975.11              | 120.81              |
| A_68_P22488130 | chr3:123149844-123149888                          | NM_008939:36       | Prss12     | INSIDE                 | 0.614                                           | 0.572                            | 1247.95             | 713.78              | 0.351                            | 1075.79             | 377.71              |
| A_68_P22488132 | chr3:123150107-123150151                          | NM_008939:298      | Prss12     | INSIDE                 | 0.636                                           | 0.483                            | 1826.65             | 883.10              | 0.307                            | 1507.45             | 463.51              |
| A_68_P28875775 | chr13:22098833-22098877                           | NM_019429:2756     | Prss16     | INSIDE                 | 0.164                                           | 0.624                            | 1531.19             | 955.62              | 0.102                            | 1187.08             | 121.26              |
| A_68_P28875777 | chr13:22099045-22099089                           | NM_019429:2544     | Prss16     | INSIDE                 | 0.467                                           | 0.536                            | 1015.41             | 544.28              | 0.250                            | 861.09              | 215.62              |
| A_68_P25308131 | chr7:96665783-96665827                            | NM_029614:292      | Prss23     | INSIDE                 | 0.322                                           | 0.621                            | 1100.59             | 683.16              | 0.200                            | 944.67              | 188.58              |
| A_68_P25508223 | chr7:135079560-135079608                          | NM_001081374:10655 | Prss36     | INSIDE                 | 0.232                                           | 0.516                            | 1289.27             | 665.11              | 0.120                            | 976.47              | 116.85              |
| A_68_P26629702 | chr9:72654701-72654745                            | NM_175485:-358     | Prtg       | PROMOTER               | 0.147                                           | 0.718                            | 4221.62             | 3030.89             | 0.106                            | 3133.78             | 330.92              |

| ProbeName      | Target position of probe on CpG island microarray | TargetID         | GeneSymbol | CpG island Description | Ratio of relative methylation (TiO2-NP/Vehicle) | Sham group                       |                     |                     | TiO <sub>2</sub> -H group        |                     |                     |
|----------------|---------------------------------------------------|------------------|------------|------------------------|-------------------------------------------------|----------------------------------|---------------------|---------------------|----------------------------------|---------------------|---------------------|
|                |                                                   |                  |            |                        |                                                 | Relative methylation (Cy-5/Cy-3) | Cy-3 signal (Input) | Cy-5 signal (MeDIP) | Relative methylation (Cy-5/Cy-3) | Cy-3 signal (Input) | Cy-5 signal (MeDIP) |
| A_68_P31983175 | chr19:17030736-17030792                           | NM_181348:157    | Prune2     | INSIDE                 | 0.087                                           | 1.416                            | 1322.36             | 1872.16             | 0.124                            | 965.87              | 119.36              |
| A_68_P25017607 | chr7:28293097-28293141                            | NM_019412:8776   | Prx        | INSIDE                 | 0.239                                           | 0.704                            | 2034.55             | 1431.90             | 0.168                            | 1479.08             | 249.09              |
| A_68_P31621133 | chr18:36124466-36124510                           | NM_028707:0      | Psd2       | INSIDE                 | 0.226                                           | 0.673                            | 1959.00             | 1317.70             | 0.152                            | 1477.38             | 224.43              |
| A_68_P31621135 | chr18:36124744-36124788                           | NM_028707:278    | Psd2       | INSIDE                 | 0.431                                           | 0.516                            | 1453.25             | 750.11              | 0.222                            | 1191.44             | 264.85              |
| A_68_P20874690 | chr1:182186271-182186316                          | NM_001128605:138 | Psen2      | INSIDE                 | 0.539                                           | 0.630                            | 2751.06             | 1733.59             | 0.340                            | 2283.29             | 775.66              |
| A_68_P23062643 | chr4:83131639-83131686                            | NM_133948:632    | Psip1      | INSIDE                 | 0.262                                           | 0.465                            | 1213.13             | 564.02              | 0.122                            | 1010.70             | 123.17              |
| A_68_P23062644 | chr4:83131741-83131785                            | NM_133948:532    | Psip1      | INSIDE                 | 0.359                                           | 0.513                            | 1767.20             | 906.00              | 0.184                            | 1327.78             | 244.70              |
| A_68_P26136633 | chr8:108424693-108424737                          | NM_173432:341    | Pskh1      | INSIDE                 | 0.320                                           | 0.553                            | 2032.17             | 1122.90             | 0.177                            | 1481.30             | 262.11              |
| A_68_P25435182 | chr7:121419370-121419414                          | NM_011965:238    | Psmal1     | INSIDE                 | 0.166                                           | 0.501                            | 1843.87             | 923.12              | 0.083                            | 1452.26             | 120.89              |
| A_68_P25435184 | chr7:121419570-121419614                          | NM_011965:38     | Psmal1     | INSIDE                 | 0.146                                           | 0.703                            | 1512.13             | 1063.11             | 0.103                            | 1137.00             | 116.81              |
| A_68_P25435185 | chr7:121419707-121419751                          | NM_011965:-98    | Psmal1     | PROMOTER               | 0.391                                           | 0.724                            | 2831.07             | 2050.70             | 0.283                            | 2139.61             | 605.66              |
| A_68_P26528578 | chr9:54798480-54798524                            | NM_011966:-163   | Psmal4     | PROMOTER               | 0.648                                           | 0.718                            | 1755.06             | 1259.28             | 0.465                            | 1265.83             | 588.51              |
| A_68_P22411525 | chr3:108059789-108059833                          | NM_011967:-33    | Psmal5     | PROMOTER               | 0.623                                           | 0.488                            | 1245.34             | 607.81              | 0.304                            | 1061.12             | 322.83              |
| A_68_P22411526 | chr3:108059982-108060035                          | NM_011967:165    | Psmal5     | INSIDE                 | 0.281                                           | 0.631                            | 1111.74             | 702.05              | 0.177                            | 808.70              | 143.42              |
| A_68_P22411529 | chr3:108060296-108060340                          | NM_011967:475    | Psmal5     | INSIDE                 | 0.364                                           | 0.576                            | 1211.32             | 697.48              | 0.210                            | 1021.59             | 214.14              |
| A_68_P28451628 | chr12:56499606-56499653                           | NM_011968:-182   | Psmal6     | PROMOTER               | 0.115                                           | 0.677                            | 2272.71             | 1538.34             | 0.078                            | 1774.29             | 138.57              |
| A_68_P28451629 | chr12:56499790-56499834                           | NM_011968:1      | Psmal6     | INSIDE                 | 0.450                                           | 0.659                            | 975.07              | 642.35              | 0.297                            | 837.49              | 248.53              |
| A_68_P21901044 | chr2:179776594-179776638                          | NM_011969:491    | Psmal7     | INSIDE                 | 0.540                                           | 0.609                            | 3878.26             | 2362.91             | 0.329                            | 2914.69             | 958.39              |
| A_68_P31065957 | chr17:15635193-15635237                           | NM_011185:26     | Psmbl1     | INSIDE                 | 0.419                                           | 0.610                            | 1107.75             | 675.79              | 0.255                            | 837.69              | 213.89              |
| A_68_P23281392 | chr4:126354680-126354732                          | NM_011970:-180   | Psmbl2     | PROMOTER               | 0.149                                           | 0.548                            | 1907.60             | 1045.23             | 0.081                            | 1430.29             | 116.46              |
| A_68_P28071923 | chr11:100956472-100956516                         | NM_008949:221    | Psmc3ip    | INSIDE                 | 0.185                                           | 0.690                            | 1160.43             | 800.63              | 0.127                            | 903.95              | 115.20              |
| A_68_P27954273 | chr11:80241942-80241986                           | NM_178616:-152   | Psmcl11    | PROMOTER               | 0.641                                           | 0.624                            | 1819.27             | 1135.26             | 0.400                            | 1508.78             | 603.12              |
| A_68_P27954278 | chr11:80242652-80242696                           | NM_178616:558    | Psmcl11    | INSIDE                 | 0.289                                           | 0.570                            | 2297.37             | 1309.55             | 0.165                            | 1732.48             | 285.19              |
| A_68_P28107295 | chr11:107340618-107340662                         | NM_025894:-201   | Psmcl2     | DIVERGENT_PROMOTER     | 0.447                                           | 0.554                            | 2323.51             | 1288.02             | 0.248                            | 1839.94             | 456.38              |
| A_68_P28107297 | chr11:107340918-107340962                         | NM_025894:99     | Psmcl2     | INSIDE                 | 0.388                                           | 0.458                            | 2343.59             | 1072.77             | 0.178                            | 1712.82             | 304.09              |
| A_68_P28107298 | chr11:107341035-107341079                         | NM_025894:215    | Psmcl2     | INSIDE                 | 0.598                                           | 0.445                            | 1765.52             | 785.03              | 0.266                            | 1435.59             | 381.52              |
| A_68_P28057822 | chr11:98544211-98544255                           | NM_009439:365    | Psmcl3     | INSIDE                 | 0.198                                           | 0.537                            | 1431.08             | 768.90              | 0.106                            | 1182.55             | 125.60              |
| A_68_P28057823 | chr11:98544328-98544372                           | NM_009439:483    | Psmcl3     | INSIDE                 | 0.363                                           | 0.643                            | 1843.14             | 1185.27             | 0.233                            | 1357.88             | 316.61              |
| A_68_P22341989 | chr3:94846418-94846462                            | NM_008951:27     | Psmcl4     | INSIDE                 | 0.434                                           | 0.561                            | 1911.42             | 1072.31             | 0.243                            | 1493.72             | 363.34              |
| A_68_P29618605 | chr14:56197304-56197348                           | NM_011189:-4     | Psmel1     | PROMOTER               | 0.228                                           | 0.455                            | 2276.43             | 1036.04             | 0.104                            | 1636.18             | 170.03              |
| A_68_P27680413 | chr11:30672528-30672572                           | NM_134013:776    | Psmel4     | INSIDE                 | 0.253                                           | 0.643                            | 816.93              | 525.46              | 0.163                            | 750.05              | 122.16              |
| A_68_P24137873 | chr5:140302698-140302742                          | NM_025604:77     | Psmg3      | INSIDE                 | 0.469                                           | 0.585                            | 1517.65             | 888.49              | 0.275                            | 1208.26             | 331.73              |
| A_68_P25528062 | chr7:138514868-138514912                          | NM_001039534:231 | Pstk       | INSIDE                 | 0.570                                           | 0.612                            | 1795.30             | 1099.46             | 0.349                            | 1420.24             | 496.16              |
| A_68_P25528063 | chr7:138515003-138515047                          | NM_001039534:365 | Pstk       | INSIDE                 | 0.413                                           | 0.557                            | 1266.05             | 704.56              | 0.230                            | 941.94              | 216.26              |
| A_68_P31849787 | chr8:78033303-78033347                            | NM_013831:36     | Pstpip2    | INSIDE                 | 0.227                                           | 0.557                            | 3770.04             | 2098.95             | 0.126                            | 2881.75             | 364.01              |
| A_68_P31849792 | chr18:78033867-78033918                           | NM_013831:604    | Pstpip2    | INSIDE                 | 0.069                                           | 1.383                            | 3351.66             | 4636.44             | 0.096                            | 2396.56             | 230.19              |
| A_68_P27279289 | chr10:79317369-79317415                           | NM_001077363:43  | Ptbp1      | INSIDE                 | 0.145                                           | 0.643                            | 3440.87             | 2213.88             | 0.093                            | 2369.15             | 221.00              |
| A_68_P22467630 | chr3:119485493-119485539                          | NM_019550:790    | Ptbp2      | INSIDE                 | 0.532                                           | 0.711                            | 1604.82             | 1140.42             | 0.378                            | 1134.49             | 428.65              |
| A_68_P29094157 | chr13:63664712-63664756                           | NM_008957:2094   | Ptch1      | INSIDE                 | 0.531                                           | 0.641                            | 1748.04             | 1119.74             | 0.340                            | 1306.15             | 444.22              |
| A_68_P29094161 | chr13:63665111-63665155                           | NM_008957:1696   | Ptch1      | INSIDE                 | 0.584                                           | 0.636                            | 1075.76             | 683.74              | 0.371                            | 814.33              | 302.29              |
| A_68_P29094165 | chr13:63665588-63665632                           | NM_008957:1218   | Ptch1      | INSIDE                 | 0.288                                           | 0.668                            | 891.25              | 595.20              | 0.193                            | 622.39              | 119.82              |
| A_68_P29094168 | chr13:63665973-63666017                           | NM_008957:834    | Ptch1      | INSIDE                 | 0.480                                           | 0.677                            | 1363.51             | 922.75              | 0.325                            | 1064.54             | 345.90              |
| A_68_P29094234 | chr13:63674256-63674300                           | NM_008957:-7450  | Ptch1      | PROMOTER               | 0.345                                           | 0.536                            | 2331.34             | 1249.73             | 0.185                            | 1792.86             | 331.49              |
| A_68_P32760541 | chrX:152057603-152057648                          | NM_001093750:245 | Ptchd1     | INSIDE                 | 0.307                                           | 1.655                            | 2211.33             | 3659.14             | 0.508                            | 896.80              | 455.50              |

| ProbeName      | Target position of probe on CpG island microarray | TargetID           | GeneSymbol | CpG island Description | Ratio of relative methylation (TiO2-NP/Vehicle) | Sham group                       |                     |                     | TiO <sub>2</sub> -H group        |                     |                     |
|----------------|---------------------------------------------------|--------------------|------------|------------------------|-------------------------------------------------|----------------------------------|---------------------|---------------------|----------------------------------|---------------------|---------------------|
|                |                                                   |                    |            |                        |                                                 | Relative methylation (Cy-5/Cy-3) | Cy-3 signal (Input) | Cy-5 signal (MeDIP) | Relative methylation (Cy-5/Cy-3) | Cy-3 signal (Input) | Cy-5 signal (MeDIP) |
| A_68_P32760557 | chrX:152059508-152059553                          | NM_001093750:-1660 | Ptchd1     | PROMOTER               | 0.496                                           | 0.613                            | 1047.90             | 641.91              | 0.304                            | 410.56              | 124.87              |
| A_68_P23393507 | chr4:147661524-147661570                          | NM_001083342:528   | Ptchd2     | INSIDE                 | 0.172                                           | 0.693                            | 1340.86             | 929.17              | 0.119                            | 1016.98             | 121.46              |
| A_68_P23393508 | chr4:147661631-147661675                          | NM_001083342:422   | Ptchd2     | INSIDE                 | 0.220                                           | 0.525                            | 1671.57             | 877.18              | 0.116                            | 1087.12             | 125.78              |
| A_68_P23393509 | chr4:147661752-147661796                          | NM_001083342:300   | Ptchd2     | INSIDE                 | 0.179                                           | 0.704                            | 3244.74             | 2285.80             | 0.126                            | 2490.23             | 314.76              |
| A_68_P32071912 | chr19:32830438-32830489                           | NM_008960:-1603    | Pten       | PROMOTER               | 0.110                                           | 0.509                            | 2568.07             | 1306.01             | 0.056                            | 2138.97             | 120.13              |
| A_68_P32071916 | chr19:32830947-32830991                           | NM_008960:-1098    | Pten       | PROMOTER               | 0.115                                           | 0.687                            | 5738.49             | 3942.91             | 0.079                            | 3993.79             | 314.99              |
| A_68_P32071917 | chr19:32831118-32831162                           | NM_008960:-926     | Pten       | PROMOTER               | 0.285                                           | 0.460                            | 1600.62             | 735.67              | 0.131                            | 1213.86             | 159.15              |
| A_68_P32071923 | chr19:32831726-32831770                           | NM_008960:-318     | Pten       | PROMOTER               | 0.465                                           | 0.486                            | 2005.36             | 974.46              | 0.226                            | 1531.13             | 345.72              |
| A_68_P21044976 | chr2:19367626-19367673                            | NM_018809:360      | Ptfla      | INSIDE                 | 0.490                                           | 0.656                            | 1479.15             | 970.04              | 0.321                            | 1286.41             | 413.57              |
| A_68_P21044977 | chr2:19367764-19367808                            | NM_018809:497      | Ptfla      | INSIDE                 | 0.232                                           | 0.402                            | 3542.83             | 1422.71             | 0.093                            | 2799.56             | 261.23              |
| A_68_P21044982 | chr2:19368271-19368321                            | NM_018809:1007     | Ptfla      | INSIDE                 | 0.314                                           | 0.649                            | 1022.44             | 663.67              | 0.204                            | 734.30              | 149.56              |
| A_68_P29568494 | chr14:45608721-45608765                           | NM_008964:957      | Ptger2     | INSIDE                 | 0.501                                           | 0.520                            | 2224.91             | 1156.07             | 0.260                            | 1586.01             | 412.60              |
| A_68_P29568495 | chr14:45608828-45608874                           | NM_008964:1065     | Ptger2     | INSIDE                 | 0.119                                           | 0.650                            | 2329.74             | 1514.40             | 0.077                            | 1565.49             | 120.82              |
| A_68_P29568499 | chr14:45609164-45609208                           | NM_008964:1401     | Ptger2     | INSIDE                 | 0.266                                           | 0.518                            | 1160.21             | 601.11              | 0.138                            | 859.22              | 118.22              |
| A_68_P29568500 | chr14:45609358-45609402                           | NM_008964:1595     | Ptger2     | INSIDE                 | 0.610                                           | 0.611                            | 1117.69             | 683.42              | 0.373                            | 827.85              | 308.64              |
| A_68_P29982792 | chr15:5192574-5192618                             | NM_001136079:1086  | Ptger4     | INSIDE                 | 0.574                                           | 0.609                            | 1175.28             | 715.29              | 0.349                            | 1048.64             | 366.06              |
| A_68_P21115151 | chr2:32251028-32251072                            | NM_133783:-359     | Ptges2     | DIVERGENT_PROMOTER     | 0.365                                           | 0.588                            | 1314.57             | 772.59              | 0.214                            | 1013.72             | 217.17              |
| A_68_P21115161 | chr2:32252153-32252197                            | NM_133783:765      | Ptges2     | INSIDE                 | 0.136                                           | 0.594                            | 2144.51             | 1273.43             | 0.081                            | 1420.51             | 114.72              |
| A_68_P21115162 | chr2:32252222-32252274                            | NM_133783:839      | Ptges2     | INSIDE                 | 0.199                                           | 0.677                            | 1509.10             | 1021.34             | 0.135                            | 1036.54             | 139.73              |
| A_68_P21834485 | chr2:167066151-167066195                          | NM_008968:-135     | Ptgs1      | PROMOTER               | 0.112                                           | 1.544                            | 7613.76             | 11758.96            | 0.174                            | 52179.26            | 899.08              |
| A_68_P21138680 | chr2:36086050-36086094                            | NM_008969:127      | Ptgs1      | INSIDE                 | 0.275                                           | 0.424                            | 2870.32             | 1216.90             | 0.117                            | 2218.77             | 258.87              |
| A_68_P26825470 | chr9:110629961-110630005                          | NM_001083936:15132 | Pth1r      | INSIDE                 | 0.187                                           | 1.773                            | 1441.41             | 2556.16             | 0.332                            | 951.18              | 316.00              |
| A_68_P26825587 | chr9:110645381-110645425                          | NM_001083936:-288  | Pth1r      | PROMOTER               | 0.199                                           | 0.714                            | 2429.62             | 1735.16             | 0.142                            | 1721.31             | 244.66              |
| A_68_P26825589 | chr9:110645592-110645636                          | NM_001083936:-500  | Pth1r      | PROMOTER               | 0.580                                           | 0.411                            | 1991.10             | 817.54              | 0.238                            | 1559.66             | 371.21              |
| A_68_P26825596 | chr9:110646504-110646548                          | NM_001083935:-336  | Pth1r      | PROMOTER               | 0.428                                           | 0.556                            | 1547.35             | 860.35              | 0.238                            | 1146.31             | 272.69              |
| A_68_P26825597 | chr9:110646599-110646643                          | NM_001083935:-430  | Pth1r      | PROMOTER               | 0.545                                           | 0.686                            | 2045.01             | 1402.42             | 0.374                            | 1634.41             | 611.20              |
| A_68_P25091647 | chr7:52436916-52436960                            | NM_053256:574      | Pth2       | INSIDE                 | 0.051                                           | 1.638                            | 5199.99             | 8515.05             | 0.083                            | 3282.43             | 273.82              |
| A_68_P24933419 | chr6:147212900-147212944                          | NM_008970:-315     | Pthlh      | PROMOTER               | 0.240                                           | 0.597                            | 1054.80             | 629.68              | 0.143                            | 825.32              | 118.20              |
| A_68_P30330337 | chr15:73253106-73253150                           | NM_007982:493      | Ptk2       | INSIDE                 | 0.111                                           | 0.566                            | 5635.53             | 3191.39             | 0.063                            | 4147.93             | 259.69              |
| A_68_P31207969 | chr17:46765813-46765857                           | NM_175168:619      | Ptk7       | INSIDE                 | 0.591                                           | 0.685                            | 1632.20             | 1117.64             | 0.405                            | 1424.66             | 576.74              |
| A_68_P31207970 | chr17:46765913-46765957                           | NM_175168:519      | Ptk7       | INSIDE                 | 0.487                                           | 0.587                            | 1359.07             | 797.16              | 0.286                            | 1009.10             | 288.38              |
| A_68_P31207971 | chr17:46765981-46766025                           | NM_175168:451      | Ptk7       | INSIDE                 | 0.203                                           | 0.523                            | 2923.74             | 1528.13             | 0.106                            | 2021.64             | 214.17              |
| A_68_P31207972 | chr17:46766049-46766093                           | NM_175168:383      | Ptk7       | INSIDE                 | 0.522                                           | 0.489                            | 3103.20             | 1518.78             | 0.255                            | 2376.47             | 606.87              |
| A_68_P31207973 | chr17:46766171-46766215                           | NM_175168:261      | Ptk7       | INSIDE                 | 0.392                                           | 0.571                            | 1376.75             | 786.16              | 0.224                            | 1101.03             | 246.77              |
| A_68_P20412581 | chr1:88421464-88421508                            | NM_008972:-1824    | Ptma       | PROMOTER               | 0.265                                           | 0.557                            | 1663.73             | 927.10              | 0.148                            | 1350.33             | 199.57              |
| A_68_P20412615 | chr1:88425095-88425139                            | NM_008972:1806     | Ptma       | INSIDE                 | 0.393                                           | 0.704                            | 1399.14             | 985.11              | 0.277                            | 1200.12             | 332.10              |
| A_68_P20412616 | chr1:88425208-88425252                            | NM_008972:1920     | Ptma       | INSIDE                 | 0.119                                           | 0.612                            | 2756.72             | 1688.08             | 0.073                            | 1995.33             | 145.61              |
| A_68_P21019038 | chr2:13976735-13976779                            | NM_001012396:906   | Ptpla      | INSIDE                 | 0.261                                           | 0.441                            | 1408.43             | 620.68              | 0.115                            | 1048.47             | 120.55              |
| A_68_P21019039 | chr2:13976814-13976858                            | NM_001012396:826   | Ptpla      | INSIDE                 | 0.417                                           | 0.459                            | 2459.88             | 1129.22             | 0.192                            | 1945.14             | 372.64              |
| A_68_P26585376 | chr9:64868976-64869020                            | NM_021345:526      | Ptplad1    | INSIDE                 | 0.411                                           | 0.593                            | 1041.52             | 618.04              | 0.244                            | 901.82              | 220.16              |
| A_68_P26585377 | chr9:64869052-64869096                            | NM_021345:450      | Ptplad1    | INSIDE                 | 0.372                                           | 0.622                            | 923.15              | 574.18              | 0.231                            | 836.12              | 193.53              |
| A_68_P21838402 | chr2:167757994-167758038                          | NM_011201:190      | Ptpn1      | INSIDE                 | 0.132                                           | 0.707                            | 3742.12             | 2644.22             | 0.093                            | 2602.61             | 242.23              |
| A_68_P21838403 | chr2:167758113-167758157                          | NM_011201:308      | Ptpn1      | INSIDE                 | 0.240                                           | 0.639                            | 2010.74             | 1284.23             | 0.153                            | 1447.22             | 221.38              |
| A_68_P23524106 | chr5:20561482-20561526                            | NM_011203:111      | Ptpn12     | INSIDE                 | 0.202                                           | 0.431                            | 2473.67             | 1066.31             | 0.087                            | 1985.19             | 172.77              |

| ProbeName      | Target position of probe on CpG island microarray | TargetID          | GeneSymbol | CpG island Description | Ratio of relative methylation (TiO2-NP/Vehicle) | Sham group                       |                     |                     | TiO <sub>2</sub> -H group        |                     |                     |
|----------------|---------------------------------------------------|-------------------|------------|------------------------|-------------------------------------------------|----------------------------------|---------------------|---------------------|----------------------------------|---------------------|---------------------|
|                |                                                   |                   |            |                        |                                                 | Relative methylation (Cy-5/Cy-3) | Cy-3 signal (Input) | Cy-5 signal (MeDIP) | Relative methylation (Cy-5/Cy-3) | Cy-3 signal (Input) | Cy-5 signal (MeDIP) |
| A_68_P23946409 | chr5:103854106-103854150                          | NM_011204:-82     | Ptpn13     | PROMOTER               | 0.560                                           | 0.619                            | 1473.05             | 912.23              | 0.347                            | 1290.53             | 447.50              |
| A_68_P20927660 | chr1:191552263-191552307                          | NM_008976:138     | Ptpn14     | INSIDE                 | 0.188                                           | 0.720                            | 1453.97             | 1046.44             | 0.135                            | 1248.33             | 168.54              |
| A_68_P20927662 | chr1:191552465-191552509                          | NM_008976:340     | Ptpn14     | INSIDE                 | 0.623                                           | 0.503                            | 1091.33             | 548.52              | 0.313                            | 858.56              | 268.81              |
| A_68_P20927663 | chr1:191552534-191552578                          | NM_008976:410     | Ptpn14     | INSIDE                 | 0.585                                           | 0.627                            | 1222.18             | 765.79              | 0.367                            | 994.35              | 364.73              |
| A_68_P20138941 | chr1:34516537-34516581                            | NM_011206:-32     | Ptpn18     | PROMOTER               | 0.649                                           | 0.553                            | 1213.68             | 671.17              | 0.359                            | 976.21              | 350.26              |
| A_68_P20138943 | chr1:34516740-34516784                            | NM_011206:172     | Ptpn18     | INSIDE                 | 0.217                                           | 0.471                            | 3441.33             | 1619.67             | 0.102                            | 2469.09             | 252.00              |
| A_68_P20138944 | chr1:34516811-34516856                            | NM_011206:243     | Ptpn18     | INSIDE                 | 0.311                                           | 0.497                            | 2255.29             | 1121.63             | 0.155                            | 1747.96             | 270.79              |
| A_68_P31793418 | chr18:67883645-67883689                           | NM_001127177:609  | Ptpn2      | INSIDE                 | 0.568                                           | 0.573                            | 2730.29             | 1565.13             | 0.326                            | 2353.85             | 766.35              |
| A_68_P26823553 | chr9:110310358-110310402                          | NM_001081043:334  | Ptpn23     | INSIDE                 | 0.395                                           | 0.521                            | 1283.21             | 669.17              | 0.206                            | 1086.75             | 223.83              |
| A_68_P26823555 | chr9:110310525-110310569                          | NM_001081043:168  | Ptpn23     | INSIDE                 | 0.324                                           | 0.428                            | 1786.44             | 765.15              | 0.139                            | 1351.38             | 187.53              |
| A_68_P20559034 | chr1:121734234-121734278                          | NM_019933:-608    | Ptpn4      | PROMOTER               | 0.354                                           | 0.690                            | 1451.93             | 1001.36             | 0.244                            | 1060.00             | 258.69              |
| A_68_P21629881 | chr2:130276040-130276084                          | NM_001163688:49   | Ptpra      | INSIDE                 | 0.518                                           | 0.626                            | 5416.56             | 3392.06             | 0.324                            | 3935.00             | 1275.44             |
| A_68_P21629885 | chr2:130276440-130276484                          | NM_001163688:449  | Ptpra      | INSIDE                 | 0.254                                           | 0.453                            | 1365.05             | 618.74              | 0.115                            | 1192.92             | 137.52              |
| A_68_P25553144 | chr7:142729766-142729810                          | NM_011212:282     | Ptprk      | INSIDE                 | 0.530                                           | 0.582                            | 1821.22             | 1059.71             | 0.308                            | 1581.80             | 487.82              |
| A_68_P23239264 | chr4:117933534-117933578                          | NM_011213:30446   | Ptprf      | INSIDE                 | 0.586                                           | 0.622                            | 2082.68             | 1295.04             | 0.364                            | 1607.52             | 585.38              |
| A_68_P23239474 | chr4:117963100-117963144                          | NM_011213:880     | Ptprf      | INSIDE                 | 0.458                                           | 0.464                            | 2532.80             | 1174.08             | 0.212                            | 1971.67             | 418.30              |
| A_68_P29405444 | chr14:12386788-12386841                           | NM_008981:748     | Ptprg      | INSIDE                 | 0.232                                           | 0.674                            | 1055.50             | 711.71              | 0.157                            | 757.52              | 118.69              |
| A_68_P29405446 | chr14:12386981-12387025                           | NM_008981:936     | Ptprg      | INSIDE                 | 0.087                                           | 0.565                            | 3968.43             | 2242.14             | 0.049                            | 2981.08             | 147.26              |
| A_68_P21417952 | chr2:90419722-90419766                            | NM_008982:1060    | Ptprj      | INSIDE                 | 0.222                                           | 0.464                            | 1393.67             | 646.07              | 0.103                            | 1167.97             | 120.06              |
| A_68_P27027630 | chr10:27794848-27794893                           | NM_008983:245     | Ptprk      | INSIDE                 | 0.218                                           | 0.474                            | 1775.42             | 841.13              | 0.103                            | 1262.62             | 130.46              |
| A_68_P31311916 | chr17:67703103-67703147                           | NM_008984:675     | Ptprm      | INSIDE                 | 0.518                                           | 0.531                            | 1401.92             | 744.02              | 0.275                            | 1148.81             | 315.56              |
| A_68_P31311919 | chr17:67703480-67703524                           | NM_008984:297     | Ptprm      | INSIDE                 | 0.386                                           | 0.444                            | 1802.80             | 799.88              | 0.171                            | 1378.61             | 235.92              |
| A_68_P31311921 | chr17:67703645-67703689                           | NM_008984:133     | Ptprm      | INSIDE                 | 0.484                                           | 0.637                            | 1627.31             | 1036.43             | 0.308                            | 1495.69             | 461.41              |
| A_68_P28768145 | chr12:117724630-117724674                         | NM_011215:460     | Ptprm2     | INSIDE                 | 0.278                                           | 0.424                            | 1564.92             | 664.12              | 0.118                            | 1091.87             | 129.03              |
| A_68_P24877028 | chr6:137201005-137201049                          | NM_001164401:207  | Ptpro      | INSIDE                 | 0.489                                           | 0.607                            | 2148.51             | 1304.75             | 0.297                            | 1693.93             | 502.81              |
| A_68_P31256335 | chr17:56601867-56601911                           | NM_011218:14015   | Ptprs      | INSIDE                 | 0.319                                           | 0.480                            | 1171.26             | 561.67              | 0.153                            | 790.94              | 121.16              |
| A_68_P31256423 | chr17:56613777-56613821                           | NM_011218:2105    | Ptprs      | INSIDE                 | 0.566                                           | 0.725                            | 2457.40             | 1782.69             | 0.411                            | 1862.73             | 764.70              |
| A_68_P31256434 | chr17:56615114-56615158                           | NM_011218:767     | Ptprs      | INSIDE                 | 0.046                                           | 1.406                            | 10793.29            | 15174.52            | 0.064                            | 6437.47             | 412.14              |
| A_68_P31256438 | chr17:56615517-56615561                           | NM_011218:365     | Ptprs      | INSIDE                 | 0.295                                           | 0.397                            | 1320.98             | 524.04              | 0.117                            | 1033.69             | 120.88              |
| A_68_P23308584 | chr4:131392713-131392757                          | NM_001083119:1459 | Ptpru      | INSIDE                 | 0.122                                           | 4.185                            | 11964.07            | 50074.15            | 0.512                            | 7209.21             | 3692.26             |
| A_68_P23308589 | chr4:131393487-131393532                          | NM_001083119:684  | Ptpru      | INSIDE                 | 0.389                                           | 1.782                            | 9005.35             | 16046.43            | 0.693                            | 5751.07             | 3988.01             |
| A_68_P23308590 | chr4:131393615-131393659                          | NM_001083119:557  | Ptpru      | INSIDE                 | 0.224                                           | 1.430                            | 2572.74             | 3680.22             | 0.321                            | 1833.59             | 587.85              |
| A_68_P23308591 | chr4:131393677-131393729                          | NM_001083119:491  | Ptpru      | INSIDE                 | 0.141                                           | 1.655                            | 2144.36             | 3549.76             | 0.233                            | 1535.45             | 357.65              |
| A_68_P23308592 | chr4:131393872-131393916                          | NM_001083119:299  | Ptpru      | INSIDE                 | 0.405                                           | 1.432                            | 2326.39             | 3331.75             | 0.580                            | 1769.52             | 1025.80             |
| A_68_P24293210 | chr6:22825825-22825869                            | NM_001081306:345  | Ptprz1     | INSIDE                 | 0.328                                           | 0.540                            | 1458.38             | 787.56              | 0.177                            | 1115.51             | 197.31              |
| A_68_P28071134 | chr11:100820206-100820250                         | NM_008986:11703   | Ptprf      | INSIDE                 | 0.410                                           | 0.593                            | 2523.39             | 1495.35             | 0.243                            | 1817.82             | 441.98              |
| A_68_P28071211 | chr11:100830670-100830714                         | NM_008986:1239    | Ptprf      | INSIDE                 | 0.195                                           | 1.562                            | 7198.03             | 11241.73            | 0.305                            | 4664.73             | 1420.47             |
| A_68_P28071212 | chr11:100830764-100830808                         | NM_008986:1145    | Ptprf      | INSIDE                 | 0.265                                           | 1.721                            | 8144.08             | 14014.31            | 0.457                            | 5451.22             | 2490.51             |
| A_68_P21117413 | chr2:32631242-32631286                            | NM_178595:-76     | Ptth1      | DIVERGENT_PROMOTER     | 0.274                                           | 0.405                            | 1300.18             | 526.14              | 0.111                            | 1049.75             | 116.57              |
| A_68_P23301758 | chr4:130219950-130220000                          | NM_001159603:701  | Pum1       | INSIDE                 | 0.397                                           | 0.586                            | 1032.44             | 605.24              | 0.232                            | 893.17              | 207.63              |
| A_68_P28223702 | chr12:8680649-8680696                             | NM_001160221:-267 | Pum2       | PROMOTER               | 0.165                                           | 0.697                            | 1143.84             | 796.86              | 0.115                            | 1045.99             | 120.19              |
| A_68_P28223705 | chr12:8681057-8681101                             | NM_030723:-408    | Pum2       | PROMOTER               | 0.601                                           | 0.620                            | 1390.83             | 862.72              | 0.373                            | 982.46              | 366.01              |
| A_68_P27568682 | chr11:6374896-6374940                             | NM_011221:1002    | Purb       | INSIDE                 | 0.353                                           | 0.344                            | 4121.48             | 1416.41             | 0.121                            | 2880.64             | 349.66              |
| A_68_P27568683 | chr11:6374982-6375033                             | NM_011221:913     | Purb       | INSIDE                 | 0.288                                           | 0.450                            | 1239.90             | 558.31              | 0.130                            | 910.10              | 117.95              |

| ProbeName      | Target position of probe on CpG island microarray | TargetID          | GeneSymbol | CpG island Description | Ratio of relative methylation (TiO2-NP/Vehicle) | Sham group                       |                     |                     | TiO <sub>2</sub> -H group        |                     |                     |
|----------------|---------------------------------------------------|-------------------|------------|------------------------|-------------------------------------------------|----------------------------------|---------------------|---------------------|----------------------------------|---------------------|---------------------|
|                |                                                   |                   |            |                        |                                                 | Relative methylation (Cy-5/Cy-3) | Cy-3 signal (Input) | Cy-5 signal (MeDIP) | Relative methylation (Cy-5/Cy-3) | Cy-3 signal (Input) | Cy-5 signal (MeDIP) |
| A_68_P23981857 | chr5:111209299-111209343                          | NM_001025561:295  | Pus1       | INSIDE                 | 0.604                                           | 0.690                            | 2104.92             | 1453.25             | 0.417                            | 1734.51             | 723.61              |
| A_68_P23538312 | chr5:23289160-23289204                            | NM_178403:297     | Pus7       | INSIDE                 | 0.304                                           | 0.336                            | 2362.92             | 793.83              | 0.102                            | 1704.18             | 174.13              |
| A_68_P30452932 | chr15:94373863-94373910                           | NM_172437:52      | Pus7l      | INSIDE                 | 0.418                                           | 0.680                            | 997.57              | 678.65              | 0.284                            | 698.60              | 198.48              |
| A_68_P26463567 | chr9:43552486-43552530                            | NM_021424:-150    | Pvrl1      | PROMOTER               | 0.167                                           | 0.447                            | 2032.39             | 908.61              | 0.075                            | 1611.49             | 120.60              |
| A_68_P26463574 | chr9:43553274-43553318                            | NM_021424:638     | Pvrl1      | INSIDE                 | 0.242                                           | 0.476                            | 1881.60             | 894.91              | 0.115                            | 1558.53             | 179.03              |
| A_68_P26463575 | chr9:43553383-43553427                            | NM_021424:746     | Pvrl1      | INSIDE                 | 0.289                                           | 0.468                            | 1102.54             | 516.48              | 0.136                            | 899.37              | 121.89              |
| A_68_P26463577 | chr9:43553595-43553639                            | NM_021424:958     | Pvrl1      | INSIDE                 | 0.344                                           | 0.566                            | 943.26              | 534.19              | 0.195                            | 727.92              | 141.86              |
| A_68_P26463578 | chr9:43553721-43553771                            | NM_021424:1088    | Pvrl1      | INSIDE                 | 0.162                                           | 0.686                            | 1618.63             | 1111.18             | 0.111                            | 1081.26             | 120.43              |
| A_68_P26464018 | chr9:43611946-43611990                            | NM_021424:59310   | Pvrl1      | INSIDE                 | 0.369                                           | 1.592                            | 2626.63             | 4180.82             | 0.588                            | 2022.89             | 1189.23             |
| A_68_P24995078 | chr7:20334418-20334462                            | NM_008990:482     | Pvrl2      | INSIDE                 | 0.441                                           | 1.457                            | 4703.29             | 6852.41             | 0.643                            | 2952.10             | 1897.15             |
| A_68_P24995079 | chr7:20334543-20334587                            | NM_008990:358     | Pvrl2      | INSIDE                 | 0.462                                           | 0.691                            | 1180.67             | 815.86              | 0.319                            | 933.98              | 298.01              |
| A_68_P24995081 | chr7:20334787-20334831                            | NM_008990:114     | Pvrl2      | INSIDE                 | 0.507                                           | 0.647                            | 2243.68             | 1452.11             | 0.328                            | 1670.83             | 547.76              |
| A_68_P24995083 | chr7:20334983-20335030                            | NM_008990:-84     | Pvrl2      | PROMOTER               | 0.181                                           | 1.931                            | 6073.00             | 11724.05            | 0.350                            | 3805.69             | 1332.55             |
| A_68_P30732552 | chr16:46496367-46496411                           | NM_021496:692     | Pvrl3      | INSIDE                 | 0.128                                           | 0.394                            | 3493.19             | 1377.76             | 0.050                            | 2607.68             | 131.51              |
| A_68_P25576662 | chr7:146434859-146434912                          | NM_001033206:505  | Pwpp2b     | INSIDE                 | 0.250                                           | 0.548                            | 1233.31             | 676.32              | 0.137                            | 886.07              | 121.68              |
| A_68_P20878432 | chr1:182834386-182834430                          | NM_133705:4       | Pycr2      | INSIDE                 | 0.316                                           | 0.464                            | 1487.39             | 690.74              | 0.147                            | 1191.12             | 174.93              |
| A_68_P20878433 | chr1:182834482-182834526                          | NM_133705:100     | Pycr2      | INSIDE                 | 0.167                                           | 0.622                            | 1580.89             | 983.05              | 0.104                            | 1154.60             | 120.26              |
| A_68_P30344972 | chr15:75751799-75751843                           | NM_025412:170     | Pyrl1      | INSIDE                 | 0.593                                           | 0.610                            | 1528.07             | 932.19              | 0.362                            | 1219.50             | 441.14              |
| A_68_P21740960 | chr2:150612370-150612414                          | NM_153781:-139    | Pygb       | PROMOTER               | 0.214                                           | 0.551                            | 1328.47             | 731.88              | 0.118                            | 995.95              | 117.64              |
| A_68_P21740962 | chr2:150612685-150612729                          | NM_153781:175     | Pygb       | INSIDE                 | 0.456                                           | 0.406                            | 1854.77             | 752.86              | 0.185                            | 1403.78             | 259.68              |
| A_68_P28519206 | chr12:71328237-71328281                           | NM_133198:412     | Pygl       | INSIDE                 | 0.199                                           | 0.564                            | 1439.20             | 811.22              | 0.112                            | 1124.78             | 126.31              |
| A_68_P28519207 | chr12:71328317-71328361                           | NM_133198:332     | Pygl       | INSIDE                 | 0.098                                           | 0.733                            | 2449.40             | 1795.97             | 0.072                            | 1678.78             | 120.54              |
| A_68_P28519208 | chr12:71328463-71328507                           | NM_133198:186     | Pygl       | INSIDE                 | 0.052                                           | 1.798                            | 6304.49             | 11338.04            | 0.093                            | 3743.06             | 346.85              |
| A_68_P26630337 | chr9:72772909-72772953                            | NM_028116:-526    | Pygol      | PROMOTER               | 0.217                                           | 0.746                            | 4817.15             | 3595.57             | 0.162                            | 3665.08             | 593.01              |
| A_68_P26630338 | chr9:72772983-72773027                            | NM_028116:-452    | Pygol      | PROMOTER               | 0.550                                           | 0.586                            | 2539.61             | 1488.02             | 0.322                            | 1916.71             | 617.62              |
| A_68_P26630344 | chr9:72773728-72773772                            | NM_028116:294     | Pygol      | INSIDE                 | 0.610                                           | 0.607                            | 1909.56             | 1159.73             | 0.371                            | 1458.27             | 540.37              |
| A_68_P22319356 | chr3:89234182-89234226                            | NM_026869:-554    | Pygo2      | PROMOTER               | 0.495                                           | 0.461                            | 1171.65             | 540.19              | 0.228                            | 971.62              | 221.59              |
| A_68_P23656662 | chr5:45841524-45841568                            | NM_024236:-78     | Qdpr       | DIVERGENT_PROMOTER     | 0.543                                           | 0.446                            | 1395.00             | 622.19              | 0.242                            | 1152.90             | 279.07              |
| A_68_P23656663 | chr5:45841705-45841749                            | NM_024236:-258    | Qdpr       | DIVERGENT_PROMOTER     | 0.157                                           | 0.492                            | 1967.61             | 968.18              | 0.077                            | 1556.45             | 120.01              |
| A_68_P31375198 | chr17:79451766-79451811                           | NM_027455:543     | Qpct       | INSIDE                 | 0.227                                           | 0.551                            | 1256.17             | 692.22              | 0.125                            | 989.53              | 123.97              |
| A_68_P24991720 | chr7:19734447-19734491                            | NM_026111:77      | Qpctl      | INSIDE                 | 0.460                                           | 0.398                            | 1844.63             | 734.75              | 0.183                            | 1385.49             | 253.69              |
| A_68_P26815242 | chr9:108420124-108420168                          | NM_001114119:729  | Qrich1     | INSIDE                 | 0.418                                           | 0.543                            | 3343.99             | 1816.39             | 0.227                            | 2647.85             | 600.78              |
| A_68_P26815243 | chr9:108420248-108420292                          | NM_001114119:855  | Qrich1     | INSIDE                 | 0.255                                           | 0.546                            | 1230.81             | 672.17              | 0.139                            | 896.46              | 124.67              |
| A_68_P21490975 | chr2:104656460-104656504                          | NM_001123327:371  | Qser1      | INSIDE                 | 0.160                                           | 0.714                            | 1495.29             | 1068.21             | 0.114                            | 1076.84             | 122.90              |
| A_68_P21490982 | chr2:104657364-104657415                          | NM_001123327:-536 | Qser1      | PROMOTER               | 0.216                                           | 0.577                            | 1357.06             | 782.79              | 0.124                            | 942.23              | 117.13              |
| A_68_P20740064 | chr1:157659559-157659603                          | NM_001024945:449  | Qsox1      | INSIDE                 | 0.374                                           | 0.659                            | 3760.37             | 2479.17             | 0.246                            | 2848.85             | 701.65              |
| A_68_P20740065 | chr1:157659643-157659687                          | NM_001024945:365  | Qsox1      | INSIDE                 | 0.464                                           | 0.440                            | 2015.71             | 886.96              | 0.204                            | 1703.67             | 348.10              |
| A_68_P20740066 | chr1:157659774-157659818                          | NM_001024945:233  | Qsox1      | INSIDE                 | 0.616                                           | 0.630                            | 2087.28             | 1315.94             | 0.389                            | 1556.18             | 604.64              |
| A_68_P21077271 | chr2:26092393-26092439                            | NM_153559:524     | Qsox2      | INSIDE                 | 0.183                                           | 0.644                            | 1176.75             | 758.17              | 0.118                            | 989.76              | 116.45              |
| A_68_P26347006 | chr9:21216708-21216752                            | NM_021888:450     | Qtrt1      | INSIDE                 | 0.615                                           | 0.495                            | 1285.34             | 636.11              | 0.304                            | 1167.96             | 355.36              |
| A_68_P29696767 | chr14:70107122-70107166                           | NM_001146012:243  | R3hcc1     | INSIDE                 | 0.179                                           | 0.480                            | 2629.67             | 1261.18             | 0.086                            | 2007.08             | 172.62              |
| A_68_P20598626 | chr1:129999945-129999989                          | NM_181750:84      | R3hdml     | INSIDE                 | 0.179                                           | 0.680                            | 1163.91             | 791.07              | 0.121                            | 967.60              | 117.56              |
| A_68_P27630331 | chr11:20101120-20101164                           | NM_008996:-462    | Rab1       | PROMOTER               | 0.503                                           | 0.633                            | 1313.60             | 830.93              | 0.318                            | 915.64              | 291.46              |
| A_68_P27630333 | chr11:20101414-20101458                           | NM_008996:-168    | Rab1       | PROMOTER               | 0.241                                           | 0.648                            | 1231.38             | 797.88              | 0.156                            | 941.83              | 146.80              |

| ProbeName      | Target position of probe on CpG island microarray | TargetID          | GeneSymbol | CpG island Description | Ratio of relative methylation (TiO2-NP/Vehicle) | Sham group                       |                     |                     | TiO <sub>2</sub> -H group        |                     |                     |
|----------------|---------------------------------------------------|-------------------|------------|------------------------|-------------------------------------------------|----------------------------------|---------------------|---------------------|----------------------------------|---------------------|---------------------|
|                |                                                   |                   |            |                        |                                                 | Relative methylation (Cy-5/Cy-3) | Cy-3 signal (Input) | Cy-5 signal (MeDIP) | Relative methylation (Cy-5/Cy-3) | Cy-3 signal (Input) | Cy-5 signal (MeDIP) |
| A_68_P27630334 | chr11:20101506-20101552                           | NM_008996:-76     | Rab1       | PROMOTER               | 0.238                                           | 0.669                            | 2440.74             | 1632.71             | 0.159                            | 1960.15             | 312.42              |
| A_68_P27630335 | chr11:20101626-20101670                           | NM_008996:44      | Rab1       | INSIDE                 | 0.488                                           | 0.626                            | 976.58              | 611.62              | 0.306                            | 867.42              | 265.32              |
| A_68_P28194541 | chr12:3309848-3309892                             | NM_016676:99      | Rab10      | INSIDE                 | 0.488                                           | 0.569                            | 2174.95             | 1238.12             | 0.278                            | 1733.52             | 481.18              |
| A_68_P31150390 | chr17:33896983-33897027                           | NM_008997:427     | Rab11b     | INSIDE                 | 0.352                                           | 0.542                            | 3620.11             | 1963.30             | 0.191                            | 2748.19             | 524.49              |
| A_68_P25737017 | chr8:28284572-28284616                            | NM_001080813:524  | Rab11fip1  | INSIDE                 | 0.497                                           | 0.587                            | 4001.98             | 2348.08             | 0.291                            | 3137.30             | 914.17              |
| A_68_P31107657 | chr17:26122228-26122272                           | NM_153140:36555   | Rab11fip3  | DOWNSTREAM             | 0.602                                           | 0.534                            | 1205.51             | 643.56              | 0.321                            | 1061.30             | 341.07              |
| A_68_P31107662 | chr17:26122929-26122973                           | NM_153140:35855   | Rab11fip3  | DOWNSTREAM             | 0.247                                           | 0.499                            | 1311.97             | 654.16              | 0.123                            | 948.80              | 116.92              |
| A_68_P31108117 | chr17:26204538-26204582                           | NM_001162868:1562 | Rab11fip3  | INSIDE                 | 0.327                                           | 0.619                            | 1921.83             | 1189.49             | 0.203                            | 1359.32             | 275.42              |
| A_68_P31108119 | chr17:26204737-26204781                           | NM_001162868:1364 | Rab11fip3  | INSIDE                 | 0.492                                           | 0.685                            | 1720.41             | 1179.28             | 0.337                            | 1446.61             | 487.65              |
| A_68_P31108129 | chr17:26205895-26205939                           | NM_001162868:206  | Rab11fip3  | INSIDE                 | 0.210                                           | 0.412                            | 1898.53             | 782.04              | 0.087                            | 1363.38             | 118.20              |
| A_68_P31108130 | chr17:26205973-26206017                           | NM_001162868:128  | Rab11fip3  | INSIDE                 | 0.481                                           | 0.682                            | 2004.10             | 1366.87             | 0.328                            | 1539.18             | 505.40              |
| A_68_P31108134 | chr17:26206603-26206648                           | NM_001162868:-503 | Rab11fip3  | PROMOTER               | 0.346                                           | 0.643                            | 1198.34             | 770.82              | 0.223                            | 907.53              | 202.24              |
| A_68_P27949792 | chr11:79404418-79404462                           | NM_175543:-273    | Rab11fip4  | PROMOTER               | 0.571                                           | 0.648                            | 1053.99             | 683.13              | 0.370                            | 778.13              | 288.13              |
| A_68_P27950225 | chr11:79474212-79474256                           | NM_175543:69521   | Rab11fip4  | INSIDE                 | 0.431                                           | 0.657                            | 1815.22             | 1192.45             | 0.283                            | 1417.94             | 401.57              |
| A_68_P24604717 | chr6:85324325-85324369                            | NM_001003955:282  | Rab11fip5  | INSIDE                 | 0.242                                           | 0.368                            | 1593.78             | 585.86              | 0.089                            | 1316.00             | 117.27              |
| A_68_P24604720 | chr6:85324839-85324883                            | NM_001003955:-232 | Rab11fip5  | PROMOTER               | 0.439                                           | 0.719                            | 1662.08             | 1194.98             | 0.316                            | 1279.46             | 404.09              |
| A_68_P31306702 | chr17:66868481-66868525                           | NM_024448:508     | Rab12      | INSIDE                 | 0.311                                           | 0.641                            | 2832.09             | 1816.20             | 0.199                            | 2142.21             | 426.63              |
| A_68_P31306703 | chr17:66868585-66868629                           | NM_024448:404     | Rab12      | INSIDE                 | 0.272                                           | 0.538                            | 1759.09             | 945.83              | 0.146                            | 1430.87             | 209.26              |
| A_68_P31306704 | chr17:66868707-66868751                           | NM_024448:282     | Rab12      | INSIDE                 | 0.548                                           | 0.368                            | 2046.32             | 752.61              | 0.201                            | 1460.20             | 294.13              |
| A_68_P31306706 | chr17:66869156-66869200                           | NM_024448:-168    | Rab12      | PROMOTER               | 0.394                                           | 0.563                            | 2387.55             | 1344.99             | 0.222                            | 1888.64             | 419.35              |
| A_68_P21132195 | chr2:35055732-35055776                            | NM_026697:886     | Rab14      | INSIDE                 | 0.580                                           | 0.630                            | 1690.96             | 1065.90             | 0.366                            | 1391.18             | 508.67              |
| A_68_P28556142 | chr12:77923792-77923838                           | NM_134050:-303    | Rab15      | PROMOTER               | 0.193                                           | 0.495                            | 1621.93             | 803.03              | 0.096                            | 1254.91             | 120.04              |
| A_68_P21871015 | chr2:173485606-173485650                          | NM_024436:283     | Rab22a     | INSIDE                 | 0.326                                           | 0.522                            | 1322.49             | 689.96              | 0.170                            | 1079.65             | 183.49              |
| A_68_P31097945 | chr17:24670178-24670222                           | NM_177375:492     | Rab26      | INSIDE                 | 0.271                                           | 0.509                            | 1134.52             | 577.72              | 0.138                            | 872.29              | 120.48              |
| A_68_P26630975 | chr9:72892792-72892836                            | NM_023635:143     | Rab27a     | INSIDE                 | 0.522                                           | 0.587                            | 2110.75             | 1239.23             | 0.307                            | 1765.63             | 541.52              |
| A_68_P31302581 | chr17:66121665-66121709                           | NM_133685:406     | Rab31      | INSIDE                 | 0.524                                           | 0.714                            | 2274.34             | 1623.87             | 0.374                            | 1834.79             | 687.09              |
| A_68_P31302583 | chr17:66121848-66121892                           | NM_133685:222     | Rab31      | INSIDE                 | 0.366                                           | 0.430                            | 1523.83             | 655.05              | 0.157                            | 1090.70             | 171.37              |
| A_68_P26936200 | chr10:10277608-10277652                           | NM_026405:375     | Rab32      | INSIDE                 | 0.372                                           | 0.664                            | 4550.56             | 3021.23             | 0.247                            | 3475.21             | 859.00              |
| A_68_P22129911 | chr3:51288253-51288297                            | NM_016858:387     | Rab33b     | INSIDE                 | 0.370                                           | 0.582                            | 1602.37             | 932.44              | 0.215                            | 1357.65             | 291.97              |
| A_68_P22129913 | chr3:51288449-51288493                            | NM_016858:583     | Rab33b     | INSIDE                 | 0.405                                           | 0.485                            | 1658.46             | 804.34              | 0.196                            | 1337.61             | 262.75              |
| A_68_P22129914 | chr3:51288525-51288569                            | NM_016858:659     | Rab33b     | INSIDE                 | 0.435                                           | 0.480                            | 2286.28             | 1096.36             | 0.208                            | 1743.88             | 363.60              |
| A_68_P27941848 | chr11:78002243-78002287                           | NM_033475:15      | Rab34      | INSIDE                 | 0.108                                           | 0.606                            | 2856.48             | 1729.90             | 0.065                            | 2086.50             | 136.39              |
| A_68_P28151618 | chr11:115015440-115015484                         | NM_021411:-29     | Rab37      | PROMOTER               | 0.367                                           | 13.375                           | 4190.60             | 56049.64            | 4.911                            | 3112.74             | 15287.51            |
| A_68_P26522114 | chr9:53513817-53513861                            | NM_175562:499     | Rab39      | INSIDE                 | 0.442                                           | 0.703                            | 1514.20             | 1064.49             | 0.311                            | 1219.90             | 379.01              |
| A_68_P26522115 | chr9:53513955-53513999                            | NM_175562:361     | Rab39      | INSIDE                 | 0.517                                           | 0.736                            | 2541.23             | 1870.45             | 0.380                            | 2054.21             | 781.16              |
| A_68_P25953808 | chr8:73279185-73279229                            | NM_001166399:629  | Rab3a      | INSIDE                 | 0.495                                           | 0.628                            | 1646.81             | 1034.74             | 0.311                            | 1179.88             | 367.20              |
| A_68_P26349534 | chr9:21722752-21722796                            | NM_031874:-209    | Rab3d      | PROMOTER               | 0.398                                           | 0.403                            | 1561.47             | 629.94              | 0.160                            | 1150.25             | 184.58              |
| A_68_P20597392 | chr1:129765401-129765445                          | NM_178690:73      | Rab3gap1   | INSIDE                 | 0.256                                           | 0.626                            | 1752.15             | 1097.06             | 0.160                            | 1416.28             | 226.66              |
| A_68_P27478501 | chr10:116386814-116386861                         | NM_001003950:599  | Rab3ip     | INSIDE                 | 0.204                                           | 0.670                            | 1135.79             | 761.11              | 0.137                            | 870.62              | 119.07              |
| A_68_P27478502 | chr10:116386947-116386991                         | NM_001003950:468  | Rab3ip     | INSIDE                 | 0.669                                           | 0.509                            | 1179.86             | 600.15              | 0.340                            | 942.38              | 320.46              |
| A_68_P28190285 | chr11:121249100-121249144                         | NM_139147:443     | Rab40b     | INSIDE                 | 0.640                                           | 0.592                            | 2051.82             | 1214.50             | 0.379                            | 1551.46             | 588.11              |
| A_68_P28190286 | chr11:121249176-121249220                         | NM_139147:367     | Rab40b     | INSIDE                 | 0.454                                           | 0.532                            | 1436.73             | 764.37              | 0.242                            | 1136.18             | 274.43              |
| A_68_P28190288 | chr11:121249326-121249370                         | NM_139147:217     | Rab40b     | INSIDE                 | 0.600                                           | 0.634                            | 866.71              | 549.64              | 0.380                            | 758.05              | 288.27              |
| A_68_P24618280 | chr6:87761089-87761133                            | NM_133717:-1362   | Rab43      | PROMOTER               | 0.313                                           | 0.552                            | 1168.34             | 645.17              | 0.173                            | 907.92              | 156.73              |

| ProbeName      | Target position of probe on CpG island microarray | TargetID           | GeneSymbol | CpG island Description | Ratio of relative methylation (TiO2-NP/Vehicle) | Sham group                       |                     |                     | TiO <sub>2</sub> -H group        |                     |                     |
|----------------|---------------------------------------------------|--------------------|------------|------------------------|-------------------------------------------------|----------------------------------|---------------------|---------------------|----------------------------------|---------------------|---------------------|
|                |                                                   |                    |            |                        |                                                 | Relative methylation (Cy-5/Cy-3) | Cy-3 signal (Input) | Cy-5 signal (MeDIP) | Relative methylation (Cy-5/Cy-3) | Cy-3 signal (Input) | Cy-5 signal (MeDIP) |
| A_68_P24618289 | chr6:87762138-87762182                            | NM_001039394:-387  | Rab43      | PROMOTER               | 0.259                                           | 1.426                            | 4902.32             | 6989.80             | 0.369                            | 3081.41             | 1138.39             |
| A_68_P25015938 | chr7:27964028-27964072                            | NM_029391:-148     | Rab4b      | PROMOTER               | 0.197                                           | 1.609                            | 6446.80             | 10373.43            | 0.318                            | 4121.72             | 1309.59             |
| A_68_P27542730 | chr10:128133098-128133142                         | NM_177411:204      | Rab5b      | INSIDE                 | 0.421                                           | 0.635                            | 1145.72             | 728.04              | 0.267                            | 1055.13             | 282.18              |
| A_68_P25368679 | chr7:107755747-107755795                          | NM_001163663:-329  | Rab6       | PROMOTER               | 0.130                                           | 0.489                            | 2520.81             | 1231.91             | 0.064                            | 1815.48             | 115.33              |
| A_68_P25368680 | chr7:107755893-107755937                          | NM_001163663:-185  | Rab6       | PROMOTER               | 0.430                                           | 0.707                            | 3728.15             | 2634.93             | 0.304                            | 2431.82             | 739.73              |
| A_68_P25368681 | chr7:107756005-107756054                          | NM_001163663:-70   | Rab6       | PROMOTER               | 0.511                                           | 0.514                            | 1615.80             | 830.53              | 0.263                            | 1380.20             | 362.52              |
| A_68_P26783903 | chr9:103014881-103014925                          | NM_173781:499      | Rab6b      | INSIDE                 | 0.579                                           | 0.656                            | 1862.64             | 1222.49             | 0.380                            | 1492.34             | 567.03              |
| A_68_P20618103 | chr1:133763971-133764015                          | NM_144875:139      | Rab71l     | INSIDE                 | 0.660                                           | 0.596                            | 1245.37             | 742.01              | 0.393                            | 1040.68             | 409.25              |
| A_68_P25959941 | chr8:74685000-74685047                            | NM_023126:-75      | Rab8a      | PROMOTER               | 0.038                                           | 1.500                            | 3214.79             | 4822.37             | 0.056                            | 2138.57             | 120.77              |
| A_68_P26595983 | chr9:66767400-66767448                            | NM_173413:88       | Rab8b      | INSIDE                 | 0.240                                           | 0.492                            | 1447.64             | 712.61              | 0.118                            | 997.94              | 117.73              |
| A_68_P32806533 | chrX:162917564-162917608                          | NM_019773:213      | Rab9       | INSIDE                 | 0.365                                           | 1.482                            | 2254.55             | 3340.86             | 0.541                            | 975.33              | 527.39              |
| A_68_P25500411 | chr7:133572604-133572648                          | NM_030566:346      | Rabep2     | INSIDE                 | 0.631                                           | 0.375                            | 1911.48             | 716.57              | 0.236                            | 1552.20             | 367.06              |
| A_68_P21129807 | chr2:34655295-34655339                            | NM_145522:-5       | Rabepk     | PROMOTER               | 0.127                                           | 0.607                            | 2249.73             | 1365.76             | 0.077                            | 1530.40             | 117.81              |
| A_68_P21142143 | chr2:37298714-37298758                            | NM_146121:-68      | Rabgap1    | DIVERGENT_PROMOTER     | 0.188                                           | 0.570                            | 1347.67             | 767.67              | 0.107                            | 1132.51             | 121.25              |
| A_68_P21142145 | chr2:37298992-37299036                            | NM_001033960:-8759 | Rabgap1    | PROMOTER               | 0.509                                           | 0.687                            | 1727.49             | 1186.17             | 0.349                            | 1324.23             | 462.48              |
| A_68_P21142186 | chr2:37308087-37308131                            | NM_001033960:335   | Rabgap1    | INSIDE                 | 0.306                                           | 0.685                            | 1593.12             | 1091.59             | 0.209                            | 1255.07             | 262.75              |
| A_68_P20768470 | chr1:162722306-162722353                          | NM_013862:740      | Rabgap1l   | INSIDE                 | 0.174                                           | 1.430                            | 1370.04             | 1959.76             | 0.249                            | 1051.90             | 261.79              |
| A_68_P20768471 | chr1:162722421-162722468                          | NM_013862:625      | Rabgap1l   | INSIDE                 | 0.047                                           | 1.347                            | 2476.00             | 3334.55             | 0.064                            | 1913.93             | 122.20              |
| A_68_P29619512 | chr14:56340802-56340846                           | NM_019519:189      | Rabggt     | INSIDE                 | 0.153                                           | 1.548                            | 4599.91             | 7122.05             | 0.237                            | 2634.55             | 624.59              |
| A_68_P29619513 | chr14:56340877-56340921                           | NM_019519:115      | Rabggt     | INSIDE                 | 0.419                                           | 1.425                            | 12228.98            | 17424.16            | 0.597                            | 7695.71             | 4593.86             |
| A_68_P22659666 | chr3:153576060-153576104                          | NM_001163478:-152  | Rabggtb    | PROMOTER               | 0.598                                           | 0.434                            | 1389.17             | 602.76              | 0.260                            | 1050.59             | 272.66              |
| A_68_P20633689 | chr1:136391258-136391302                          | NM_145510:44       | Rabif      | INSIDE                 | 0.552                                           | 0.449                            | 1167.36             | 523.97              | 0.248                            | 924.39              | 229.20              |
| A_68_P30426166 | chr15:89421992-89422040                           | NM_026817:338      | Rabl2      | INSIDE                 | 0.276                                           | 0.526                            | 1238.52             | 651.34              | 0.145                            | 816.93              | 118.47              |
| A_68_P24156971 | chr5:144288853-144288897                          | NM_009007:-13      | Rac1       | PROMOTER               | 0.560                                           | 0.666                            | 2639.95             | 1758.58             | 0.373                            | 1981.84             | 738.77              |
| A_68_P28186389 | chr11:120582623-120582667                         | NM_133223:-137     | Rac3       | PROMOTER               | 0.453                                           | 0.512                            | 2079.93             | 1065.18             | 0.232                            | 1557.23             | 361.05              |
| A_68_P30010836 | chr15:10415930-10415974                           | NM_011232:164      | Rad1       | INSIDE                 | 0.656                                           | 0.690                            | 1309.92             | 903.80              | 0.452                            | 1088.47             | 492.49              |
| A_68_P24755176 | chr6:112646414-112646458                          | NM_001167730:228   | Rad18      | INSIDE                 | 0.421                                           | 0.605                            | 1133.64             | 685.89              | 0.255                            | 962.43              | 245.03              |
| A_68_P30213987 | chr15:51823056-51823100                           | NM_009009:228      | Rad21      | INSIDE                 | 0.581                                           | 0.625                            | 1189.79             | 743.37              | 0.363                            | 1281.63             | 465.47              |
| A_68_P22933513 | chr4:55363588-55363632                            | NM_009011:697      | Rad23b     | INSIDE                 | 0.206                                           | 0.722                            | 3535.60             | 2554.47             | 0.149                            | 2988.87             | 444.07              |
| A_68_P27806201 | chr11:53520531-53520577                           | NM_009012:267      | Rad50      | INSIDE                 | 0.297                                           | 0.617                            | 1174.44             | 724.17              | 0.183                            | 1066.68             | 195.06              |
| A_68_P24829778 | chr6:126889168-126889219                          | NM_009013:380      | Rad51ap1   | INSIDE                 | 0.166                                           | 0.500                            | 2037.07             | 1018.09             | 0.083                            | 1424.51             | 118.04              |
| A_68_P24829780 | chr6:126889329-126889373                          | NM_009013:223      | Rad51ap1   | INSIDE                 | 0.429                                           | 0.705                            | 3601.47             | 2537.98             | 0.302                            | 2733.45             | 825.52              |
| A_68_P27994099 | chr11:87217797-87217841                           | NM_053269:179      | Rad51c     | INSIDE                 | 0.257                                           | 0.544                            | 949.30              | 516.49              | 0.140                            | 860.86              | 120.27              |
| A_68_P22730294 | chr4:11486345-11486389                            | NM_001039556:248   | Rad54b     | INSIDE                 | 0.222                                           | 0.604                            | 2029.09             | 1225.36             | 0.134                            | 1473.31             | 197.23              |
| A_68_P24152254 | chr5:143026387-143026435                          | NM_178702:621      | Rad51      | INSIDE                 | 0.114                                           | 1.559                            | 2185.39             | 3406.71             | 0.178                            | 1407.95             | 250.40              |
| A_68_P21867064 | chr2:172826009-172826053                          | NM_175112:413      | Rae1       | INSIDE                 | 0.616                                           | 0.612                            | 1108.55             | 678.63              | 0.377                            | 967.90              | 365.17              |
| A_68_P26997165 | chr10:21879836-21879886                           | NM_009016:1446     | Raet1a     | INSIDE                 | 0.332                                           | 0.691                            | 1210.19             | 835.66              | 0.230                            | 953.47              | 218.83              |
| A_68_P27840802 | chr11:59919053-59919097                           | NM_009021:560      | Rai1       | INSIDE                 | 0.325                                           | 0.609                            | 4194.73             | 2555.13             | 0.198                            | 3321.06             | 658.23              |
| A_68_P27840803 | chr11:59919168-59919212                           | NM_009021:676      | Rai1       | INSIDE                 | 0.168                                           | 0.674                            | 5339.83             | 3600.58             | 0.113                            | 4163.27             | 470.39              |
| A_68_P27840876 | chr11:59928639-59928683                           | NM_009021:10146    | Rai1       | INSIDE                 | 0.265                                           | 0.523                            | 2954.70             | 1544.03             | 0.138                            | 2300.34             | 318.32              |
| A_68_P27841324 | chr11:59989338-59989382                           | NM_001037764:35777 | Rai1       | INSIDE                 | 0.477                                           | 0.623                            | 1199.73             | 746.89              | 0.297                            | 978.58              | 290.76              |
| A_68_P27841330 | chr11:59989954-59989998                           | NM_001037764:36393 | Rai1       | INSIDE                 | 0.610                                           | 0.405                            | 3478.04             | 1409.63             | 0.247                            | 2566.04             | 634.55              |
| A_68_P27841333 | chr11:59990255-59990299                           | NM_001037764:36693 | Rai1       | INSIDE                 | 0.390                                           | 0.377                            | 1620.98             | 611.52              | 0.147                            | 1174.81             | 172.69              |
| A_68_P20557410 | chr1:121400955-121400999                          | NM_022327:383      | Ralb       | INSIDE                 | 0.228                                           | 0.470                            | 1289.95             | 606.52              | 0.107                            | 1098.83             | 117.85              |



| ProbeName      | Target position of probe on CpG island microarray | TargetID           | GeneSymbol | CpG island Description | Ratio of relative methylation (TiO2-NP/Vehicle) | Sham group                       |                     |                     | TiO <sub>2</sub> -H group        |                     |                     |
|----------------|---------------------------------------------------|--------------------|------------|------------------------|-------------------------------------------------|----------------------------------|---------------------|---------------------|----------------------------------|---------------------|---------------------|
|                |                                                   |                    |            |                        |                                                 | Relative methylation (Cy-5/Cy-3) | Cy-3 signal (Input) | Cy-5 signal (MeDIP) | Relative methylation (Cy-5/Cy-3) | Cy-3 signal (Input) | Cy-5 signal (MeDIP) |
| A_68_P20557411 | chr1:121401081-121401125                          | NM_022327:257      | Ralb       | INSIDE                 | 0.543                                           | 0.592                            | 3035.96             | 1797.70             | 0.322                            | 2369.74             | 762.06              |
| A_68_P20557414 | chr1:121401510-121401554                          | NM_022327:-173     | Ralb       | PROMOTER               | 0.140                                           | 0.616                            | 1876.08             | 1155.68             | 0.086                            | 1397.04             | 120.39              |
| A_68_P20557415 | chr1:121401606-121401656                          | NM_022327:-271     | Ralb       | PROMOTER               | 0.364                                           | 0.498                            | 1170.49             | 582.38              | 0.181                            | 884.83              | 160.09              |
| A_68_P31303253 | chr17:66234412-66234456                           | NM_001198949:-171  | Ralbp1     | PROMOTER               | 0.478                                           | 0.647                            | 1063.99             | 688.12              | 0.309                            | 889.87              | 274.93              |
| A_68_P31303254 | chr17:66234502-66234546                           | NM_001198949:-261  | Ralbp1     | PROMOTER               | 0.581                                           | 0.565                            | 1492.42             | 842.92              | 0.328                            | 1169.84             | 384.02              |
| A_68_P21091470 | chr2:28369078-28369122                            | NM_001145834:414   | Ralgds     | INSIDE                 | 0.300                                           | 0.445                            | 1702.64             | 757.67              | 0.133                            | 1231.55             | 164.31              |
| A_68_P20745868 | chr1:158870188-158870239                          | NM_001159965:-456  | Ralgs2     | PROMOTER               | 0.121                                           | 0.713                            | 1773.03             | 1264.17             | 0.086                            | 1351.45             | 116.36              |
| A_68_P21762356 | chr2:154616308-154616364                          | NM_001139511:-509  | Raly       | PROMOTER               | 0.149                                           | 0.574                            | 2066.36             | 1187.01             | 0.086                            | 1455.79             | 124.90              |
| A_68_P21762357 | chr2:154616385-154616429                          | NM_001139511:-439  | Raly       | PROMOTER               | 0.574                                           | 0.530                            | 5463.18             | 2897.66             | 0.304                            | 4104.39             | 1249.13             |
| A_68_P21762361 | chr2:154616920-154616964                          | NM_001139511:97    | Raly       | INSIDE                 | 0.390                                           | 0.495                            | 1287.23             | 637.07              | 0.193                            | 1030.27             | 199.03              |
| A_68_P21762363 | chr2:154617145-154617189                          | NM_001139511:321   | Raly       | INSIDE                 | 0.381                                           | 0.604                            | 2141.14             | 1293.22             | 0.230                            | 1803.78             | 415.27              |
| A_68_P21952653 | chr3:13472808-13472852                            | NM_001163328:1176  | Raly1      | INSIDE                 | 0.662                                           | 0.669                            | 2071.17             | 1384.94             | 0.442                            | 1586.41             | 701.86              |
| A_68_P21952656 | chr3:13473217-13473261                            | NM_001163328:1584  | Raly1      | INSIDE                 | 0.177                                           | 0.658                            | 1229.02             | 809.30              | 0.117                            | 1061.28             | 123.71              |
| A_68_P28072822 | chr11:101107992-101108036                         | NM_019444:367      | Ramp2      | INSIDE                 | 0.427                                           | 0.617                            | 1396.03             | 861.11              | 0.263                            | 1052.20             | 276.94              |
| A_68_P30578587 | chr16:18248121-18248165                           | NM_011239:645      | Ranbp1     | INSIDE                 | 0.201                                           | 0.579                            | 1146.06             | 664.12              | 0.117                            | 1005.90             | 117.32              |
| A_68_P27695167 | chr11:33413838-33413882                           | NM_023146:-114     | Ranbp17    | PROMOTER               | 0.619                                           | 0.547                            | 1762.37             | 964.25              | 0.339                            | 1472.20             | 498.76              |
| A_68_P31257591 | chr17:56812887-56812931                           | NM_027933:229      | Ranbp3     | INSIDE                 | 0.203                                           | 0.329                            | 2100.47             | 690.05              | 0.067                            | 1813.72             | 120.85              |
| A_68_P32054982 | chr19:29887617-29887661                           | NM_177721:-174     | Ranbp6     | PROMOTER               | 0.215                                           | 0.635                            | 1252.81             | 794.95              | 0.136                            | 978.17              | 133.14              |
| A_68_P30379305 | chr15:81560318-81560371                           | NM_001146174:5     | Rangap1    | INSIDE                 | 0.173                                           | 0.717                            | 1472.99             | 1056.85             | 0.124                            | 946.00              | 117.49              |
| A_68_P22399296 | chr3:105603567-105603617                          | NM_145541:662      | Rap1a      | INSIDE                 | 0.281                                           | 0.550                            | 973.04              | 534.79              | 0.154                            | 755.33              | 116.69              |
| A_68_P27921006 | chr11:74335943-74335987                           | NM_001015046:67696 | Rap1gap2   | INSIDE                 | 0.594                                           | 0.532                            | 2306.35             | 1226.08             | 0.316                            | 1703.70             | 538.42              |
| A_68_P27921011 | chr11:74336607-74336651                           | NM_001015046:67032 | Rap1gap2   | INSIDE                 | 0.482                                           | 0.673                            | 3342.51             | 2250.51             | 0.324                            | 2475.59             | 802.64              |
| A_68_P27921014 | chr11:74336964-74337008                           | NM_001015046:66674 | Rap1gap2   | INSIDE                 | 0.229                                           | 0.567                            | 1792.23             | 1016.13             | 0.130                            | 1253.56             | 162.62              |
| A_68_P27921382 | chr11:74403457-74403501                           | NM_001015046:182   | Rap1gap2   | INSIDE                 | 0.401                                           | 0.564                            | 1202.64             | 678.74              | 0.227                            | 932.96              | 211.38              |
| A_68_P22572455 | chr3:138738714-138738758                          | NM_001040690:-573  | Rap1gds1   | PROMOTER               | 0.656                                           | 0.377                            | 1539.73             | 581.21              | 0.248                            | 1233.78             | 305.44              |
| A_68_P29950631 | chr14:120878349-120878398                         | NM_029519:691      | Rap2a      | INSIDE                 | 0.290                                           | 0.569                            | 1022.09             | 582.08              | 0.165                            | 727.34              | 120.08              |
| A_68_P22182580 | chr3:61168280-61168324                            | NM_028712:-126     | Rap2b      | PROMOTER               | 0.244                                           | 0.606                            | 1397.27             | 846.36              | 0.148                            | 1139.91             | 168.73              |
| A_68_P32374343 | chrX:48371227-48371271                            | NM_172413:-53      | Rap2c      | PROMOTER               | 0.303                                           | 5.261                            | 4264.93             | 22436.89            | 1.595                            | 2010.66             | 3206.85             |
| A_68_P32374347 | chrX:48371964-48372008                            | NM_172413:-791     | Rap2c      | PROMOTER               | 0.190                                           | 1.458                            | 1877.31             | 2737.70             | 0.277                            | 894.54              | 247.55              |
| A_68_P32374349 | chrX:48372156-48372200                            | NM_172413:-983     | Rap2c      | PROMOTER               | 0.161                                           | 1.550                            | 916.33              | 1420.77             | 0.249                            | 484.48              | 120.83              |
| A_68_P20269871 | chr1:60624074-60624118                            | NM_001045513:-487  | Raph1      | PROMOTER               | 0.346                                           | 0.454                            | 1323.52             | 601.18              | 0.157                            | 1077.61             | 169.44              |
| A_68_P28059432 | chr11:98798988-98799032                           | NM_001177302:-21   | Rara       | PROMOTER               | 0.479                                           | 0.604                            | 1672.00             | 1009.06             | 0.289                            | 1168.93             | 337.96              |
| A_68_P28059598 | chr11:98821127-98821171                           | NM_001176528:-636  | Rara       | PROMOTER               | 0.311                                           | 0.634                            | 1923.06             | 1218.81             | 0.197                            | 1477.29             | 291.35              |
| A_68_P29430092 | chr14:17408235-17408279                           | NM_011243:-532     | Rarb       | PROMOTER               | 0.319                                           | 0.438                            | 2884.54             | 1262.51             | 0.140                            | 2205.74             | 308.24              |
| A_68_P30496838 | chr15:102077585-102077629                         | NM_00104272:-823   | Rarg       | PROMOTER               | 0.593                                           | 0.414                            | 1630.74             | 674.50              | 0.245                            | 1351.07             | 331.20              |
| A_68_P30496839 | chr15:102077744-102077788                         | NM_00104272:-983   | Rarg       | PROMOTER               | 0.627                                           | 0.484                            | 1077.53             | 522.05              | 0.304                            | 882.94              | 268.37              |
| A_68_P30496840 | chr15:102077921-102077968                         | NM_00104272:-1161  | Rarg       | PROMOTER               | 0.238                                           | 0.454                            | 1342.61             | 609.51              | 0.108                            | 1082.86             | 116.92              |
| A_68_P22210464 | chr3:67319384-67319428                            | NM_001164763:39    | Rarres1    | INSIDE                 | 0.129                                           | 0.715                            | 5444.87             | 3895.74             | 0.092                            | 4132.73             | 380.10              |
| A_68_P22210465 | chr3:67319575-67319619                            | NM_001164763:-151  | Rarres1    | PROMOTER               | 0.563                                           | 0.605                            | 1333.46             | 806.95              | 0.341                            | 1058.70             | 360.81              |
| A_68_P26748149 | chr9:96531046-96531090                            | NM_053268:854      | Rasa2      | INSIDE                 | 0.197                                           | 0.591                            | 1442.12             | 852.04              | 0.117                            | 1172.93             | 136.65              |
| A_68_P26748151 | chr9:96531280-96531324                            | NM_053268:620      | Rasa2      | INSIDE                 | 0.616                                           | 0.558                            | 2267.55             | 1265.27             | 0.344                            | 2134.17             | 733.36              |
| A_68_P25669972 | chr8:13677124-13677168                            | NM_009025:441      | Rasa3      | INSIDE                 | 0.254                                           | 0.689                            | 2615.30             | 1803.09             | 0.175                            | 1884.79             | 329.83              |
| A_68_P24119438 | chr5:136578137-136578181                          | NM_133914:18373    | Rasa4      | INSIDE                 | 0.553                                           | 0.659                            | 1416.44             | 932.98              | 0.364                            | 1122.29             | 409.03              |
| A_68_P24119440 | chr5:136578358-136578403                          | NM_133914:18595    | Rasa4      | INSIDE                 | 0.294                                           | 0.548                            | 1458.41             | 798.68              | 0.161                            | 1075.99             | 172.99              |

| ProbeName      | Target position of probe on CpG island microarray | TargetID            | GeneSymbol   | CpG island Description | Ratio of relative methylation (TiO2-NP/Vehicle) | Sham group                       |                     |                     | TiO <sub>2</sub> -H group        |                     |                     |
|----------------|---------------------------------------------------|---------------------|--------------|------------------------|-------------------------------------------------|----------------------------------|---------------------|---------------------|----------------------------------|---------------------|---------------------|
|                |                                                   |                     |              |                        |                                                 | Relative methylation (Cy-5/Cy-3) | Cy-3 signal (Input) | Cy-5 signal (MeDIP) | Relative methylation (Cy-5/Cy-3) | Cy-3 signal (Input) | Cy-5 signal (MeDIP) |
| A_68_P24040026 | chr5:121098911-121098955                          | NM_013832:102       | Rasal1       | INSIDE                 | 0.206                                           | 1.637                            | 3219.68             | 5269.97             | 0.338                            | 2523.31             | 851.68              |
| A_68_P24040027 | chr5:121099008-121099052                          | NM_013832:200       | Rasal1       | INSIDE                 | 0.081                                           | 2.528                            | 1026.21             | 2594.46             | 0.204                            | 595.00              | 121.17              |
| A_68_P24040029 | chr5:121099253-121099297                          | NM_013832:444       | Rasal1       | INSIDE                 | 0.253                                           | 0.361                            | 1675.88             | 604.30              | 0.091                            | 1277.89             | 116.66              |
| A_68_P24040031 | chr5:121099444-121099488                          | NM_013832:636       | Rasal1       | INSIDE                 | 0.275                                           | 0.569                            | 1124.74             | 640.49              | 0.157                            | 921.54              | 144.51              |
| A_68_P23922675 | chr5:99681822-99681866                            | NM_145839:102       | Rasgrf1b     | INSIDE                 | 0.128                                           | 0.513                            | 2574.10             | 1321.64             | 0.066                            | 1827.96             | 119.74              |
| A_68_P26714904 | chr9:89805072-89805116                            | NM_001039655:482    | Rasgrf1      | INSIDE                 | 0.376                                           | 0.641                            | 1055.56             | 676.09              | 0.241                            | 881.96              | 212.28              |
| A_68_P26714905 | chr9:89805194-89805241                            | NM_001039655:605    | Rasgrf1      | INSIDE                 | 0.237                                           | 0.593                            | 1021.30             | 605.32              | 0.141                            | 834.71              | 117.30              |
| A_68_P26714893 | chr9:89803729-89803773                            | NM_001039655:-862   | Rasgrf1      | PROMOTER               | 0.669                                           | 0.659                            | 856.26              | 564.24              | 0.441                            | 715.42              | 315.48              |
| A_68_P21557415 | chr2:117168712-117168756                          | NM_011246:-121      | Rasgrp1      | PROMOTER               | 0.434                                           | 0.597                            | 1661.08             | 991.78              | 0.259                            | 1394.04             | 361.06              |
| A_68_P31934460 | chr19:6398732-6398778                             | NM_011242:-1828     | Rasgrp2      | PROMOTER               | 0.578                                           | 0.465                            | 1130.32             | 525.27              | 0.268                            | 897.33              | 240.83              |
| A_68_P31934468 | chr19:6399999-6400043                             | NM_011242:-562      | Rasgrp2      | PROMOTER               | 0.317                                           | 0.548                            | 4238.66             | 2323.82             | 0.174                            | 3283.47             | 570.34              |
| A_68_P25094132 | chr7:52884421-52884465                            | NM_028544:1536      | Rasip1       | INSIDE                 | 0.536                                           | 1.350                            | 2985.70             | 4029.90             | 0.724                            | 2220.03             | 1606.46             |
| A_68_P27971294 | chr11:83223607-83223651                           | NM_001013386:55     | Rasl10b      | INSIDE                 | 0.390                                           | 0.597                            | 1329.78             | 794.26              | 0.233                            | 967.02              | 225.31              |
| A_68_P24170389 | chr5:147656737-147656781                          | NM_026864:112       | Rasl11a      | INSIDE                 | 0.560                                           | 0.649                            | 1181.89             | 767.18              | 0.364                            | 1037.70             | 377.39              |
| A_68_P24170392 | chr5:147657058-147657102                          | NM_026864:434       | Rasl11a      | INSIDE                 | 0.293                                           | 0.666                            | 1475.99             | 983.08              | 0.195                            | 1211.41             | 236.39              |
| A_68_P24170393 | chr5:147657202-147657261                          | NM_026864:585       | Rasl11a      | INSIDE                 | 0.262                                           | 0.628                            | 862.86              | 542.00              | 0.165                            | 744.37              | 122.61              |
| A_68_P23801766 | chr5:74590964-74591008                            | NM_026878:-364      | Rasl11b      | PROMOTER               | 0.269                                           | 0.565                            | 2245.94             | 1269.74             | 0.152                            | 1672.29             | 254.39              |
| A_68_P23801769 | chr5:74591333-74591377                            | NM_026878:4         | Rasl11b      | INSIDE                 | 0.309                                           | 0.462                            | 1675.56             | 773.71              | 0.143                            | 1358.00             | 194.04              |
| A_68_P26809513 | chr9:107456377-107456421                          | NM_019713:-588      | Rassf1       | PROMOTER               | 0.203                                           | 0.686                            | 1131.58             | 775.79              | 0.139                            | 839.72              | 116.60              |
| A_68_P26809514 | chr9:107456460-107456504                          | NM_019713:-504      | Rassf1       | PROMOTER               | 0.291                                           | 0.569                            | 1935.92             | 1101.47             | 0.166                            | 1313.80             | 217.82              |
| A_68_P26809521 | chr9:107457493-107457537                          | NM_019713:528       | Rassf1       | INSIDE                 | 0.598                                           | 0.495                            | 1189.45             | 588.53              | 0.296                            | 931.76              | 275.71              |
| A_68_P25427824 | chr7:120098233-120098277                          | NM_175279:779       | Rassf10      | INSIDE                 | 0.277                                           | 0.501                            | 2614.57             | 1308.78             | 0.139                            | 2103.27             | 292.12              |
| A_68_P27503751 | chr10:120912576-120912620                         | NM_138956:708       | Rassf3       | INSIDE                 | 0.529                                           | 0.636                            | 2735.34             | 1740.44             | 0.337                            | 2085.38             | 702.08              |
| A_68_P24777649 | chr6:116623707-116623752                          | NM_178045:125       | Rassf4       | INSIDE                 | 0.359                                           | 0.617                            | 1306.76             | 805.96              | 0.221                            | 923.35              | 204.47              |
| A_68_P24777650 | chr6:116623776-116623820                          | NM_178045:56        | Rassf4       | INSIDE                 | 0.168                                           | 0.732                            | 1966.25             | 1439.87             | 0.123                            | 1437.39             | 176.71              |
| A_68_P25587465 | chr7:148401434-148401478                          | NM_025886:-302      | Rassf7       | DIVERGENT_PROMOTER     | 0.166                                           | 0.605                            | 1453.65             | 879.77              | 0.100                            | 1148.80             | 115.26              |
| A_68_P25587466 | chr7:148401511-148401555                          | NM_025886:-226      | Rassf7       | DIVERGENT_PROMOTER     | 0.249                                           | 0.482                            | 3154.33             | 1521.92             | 0.120                            | 1867.66             | 224.16              |
| A_68_P26345409 | chr9:20896597-20896641                            | NR_038081:-166      | Raver1-fdx11 | PROMOTER               | 0.165                                           | 0.695                            | 1766.46             | 1226.87             | 0.114                            | 1290.26             | 147.57              |
| A_68_P23152967 | chr4:100741468-100741512                          | NM_183024:-152      | Raver2       | PROMOTER               | 0.338                                           | 0.552                            | 1400.97             | 773.23              | 0.187                            | 1240.37             | 231.50              |
| A_68_P23152972 | chr4:100742061-100742105                          | NM_183024:440       | Raver2       | INSIDE                 | 0.122                                           | 2.092                            | 3660.61             | 7659.09             | 0.255                            | 2427.75             | 618.92              |
| A_68_P23152973 | chr4:100742175-100742219                          | NM_183024:554       | Raver2       | INSIDE                 | 0.123                                           | 2.177                            | 3486.44             | 7590.62             | 0.268                            | 2492.45             | 667.52              |
| A_68_P20011680 | chr1:6204723-6204767                              | NM_009826:2         | Rb1cc1       | INSIDE                 | 0.433                                           | 0.385                            | 1750.61             | 674.21              | 0.167                            | 1388.61             | 231.75              |
| A_68_P25481826 | chr7:130114107-130114151                          | NM_175023:51        | Rbbp6        | INSIDE                 | 0.317                                           | 0.383                            | 1654.05             | 634.13              | 0.121                            | 1313.93             | 159.46              |
| A_68_P32790792 | chrX:159198218-159198262                          | NM_009031:-63       | Rbbp7        | PROMOTER               | 0.229                                           | 2.049                            | 3263.63             | 6685.96             | 0.469                            | 1471.76             | 690.26              |
| A_68_P32790799 | chrX:159199053-159199097                          | NM_009031:771       | Rbbp7        | INSIDE                 | 0.094                                           | 2.219                            | 4538.78             | 10072.80            | 0.208                            | 2097.62             | 435.96              |
| A_68_P31496430 | chr18:11816616-11816661                           | NM_001081223:288    | Rbbp8        | INSIDE                 | 0.140                                           | 0.659                            | 1681.30             | 1108.46             | 0.092                            | 1244.74             | 114.89              |
| A_68_P21748795 | chr2:152158169-152158213                          | NM_001083921:-29    | Rbck1        | PROMOTER               | 0.424                                           | 0.622                            | 1354.24             | 841.74              | 0.264                            | 1240.43             | 326.89              |
| A_68_P30518123 | chr16:5885155-5885211                             | NM_021477:297       | Rbfox1       | INSIDE                 | 0.274                                           | 0.595                            | 1352.88             | 805.35              | 0.163                            | 1019.62             | 166.57              |
| A_68_P30520835 | chr16:6349110-6349154                             | NM_021477:464247    | Rbfox1       | INSIDE                 | 0.283                                           | 0.648                            | 1817.20             | 1176.68             | 0.183                            | 1424.51             | 260.77              |
| A_68_P28172264 | chr11:118430533-118430577                         | NM_001024931:340332 | Rbfox3       | INSIDE                 | 0.522                                           | 0.513                            | 1315.00             | 674.32              | 0.268                            | 984.46              | 263.47              |
| A_68_P28172265 | chr11:118430608-118430652                         | NM_001024931:340256 | Rbfox3       | INSIDE                 | 0.293                                           | 0.490                            | 1592.34             | 780.22              | 0.143                            | 1158.14             | 166.16              |
| A_68_P28174642 | chr11:118771162-118771206                         | NM_001024931:-298   | Rbfox3       | PROMOTER               | 0.254                                           | 0.604                            | 1069.81             | 646.22              | 0.154                            | 769.17              | 118.08              |
| A_68_P26056692 | chr8:93594415-93594471                            | NM_011250:450       | Rbl2         | INSIDE                 | 0.182                                           | 0.594                            | 1386.35             | 823.65              | 0.108                            | 1123.90             | 121.48              |
| A_68_P32289235 | chrX:20194111-20194155                            | NM_001167775:-496   | Rbm10        | PROMOTER               | 0.311                                           | 1.498                            | 1293.19             | 1937.09             | 0.466                            | 657.26              | 305.99              |

| ProbeName      | Target position of probe on CpG island microarray | TargetID          | GeneSymbol | CpG island Description | Ratio of relative methylation (TiO2-NP/Vehicle) | Sham group                       |                     |                     | TiO <sub>2</sub> -H group        |                     |                     |
|----------------|---------------------------------------------------|-------------------|------------|------------------------|-------------------------------------------------|----------------------------------|---------------------|---------------------|----------------------------------|---------------------|---------------------|
|                |                                                   |                   |            |                        |                                                 | Relative methylation (Cy-5/Cy-3) | Cy-3 signal (Input) | Cy-5 signal (MeDIP) | Relative methylation (Cy-5/Cy-3) | Cy-3 signal (Input) | Cy-5 signal (MeDIP) |
| A_68_P32289247 | chrX:20195452-20195505                            | NM_001167776:594  | Rbm10      | INSIDE                 | 0.093                                           | 1.501                            | 2255.84             | 3386.70             | 0.139                            | 849.63              | 118.40              |
| A_68_P32289248 | chrX:20195553-20195607                            | NM_001167776:696  | Rbm10      | INSIDE                 | 0.143                                           | 2.026                            | 1692.56             | 3428.57             | 0.291                            | 715.96              | 208.02              |
| A_68_P30879835 | chr16:75593202-75593246                           | NM_198302:89      | Rbm11      | INSIDE                 | 0.322                                           | 0.573                            | 1181.66             | 676.84              | 0.185                            | 981.41              | 181.14              |
| A_68_P31925255 | chr19:4811527-4811571                             | NM_019869:86      | Rbm14      | INSIDE                 | 0.543                                           | 0.553                            | 1317.37             | 728.30              | 0.300                            | 1027.16             | 308.37              |
| A_68_P31925256 | chr19:4811668-4811714                             | NM_019869:-56     | Rbm14      | PROMOTER               | 0.183                                           | 0.522                            | 1427.01             | 744.50              | 0.096                            | 1211.67             | 115.81              |
| A_68_P31925257 | chr19:4811827-4811871                             | NM_019869:-214    | Rbm14      | PROMOTER               | 0.384                                           | 0.487                            | 1962.26             | 954.80              | 0.187                            | 1835.14             | 342.81              |
| A_68_P22405706 | chr3:107135381-107135431                          | NM_001045807:801  | Rbm15      | INSIDE                 | 0.217                                           | 0.465                            | 1542.54             | 716.97              | 0.101                            | 1153.45             | 116.49              |
| A_68_P22405708 | chr3:107135601-107135645                          | NM_001045807:585  | Rbm15      | INSIDE                 | 0.540                                           | 0.544                            | 1421.81             | 774.13              | 0.294                            | 1190.38             | 349.86              |
| A_68_P22405711 | chr3:107135861-107135907                          | NM_001045807:323  | Rbm15      | INSIDE                 | 0.236                                           | 0.524                            | 1429.53             | 748.48              | 0.123                            | 1113.74             | 137.33              |
| A_68_P22405717 | chr3:107136584-107136628                          | NM_001045807:-399 | Rbm15      | PROMOTER               | 0.556                                           | 0.481                            | 1819.97             | 875.19              | 0.267                            | 1356.02             | 362.69              |
| A_68_P26805684 | chr9:106788066-106788110                          | NM_175402:1243    | Rbm15b     | INSIDE                 | 0.266                                           | 0.639                            | 849.13              | 542.77              | 0.170                            | 678.03              | 115.28              |
| A_68_P26805685 | chr9:106788200-106788244                          | NM_175402:1109    | Rbm15b     | INSIDE                 | 0.492                                           | 0.598                            | 1088.56             | 651.41              | 0.294                            | 830.57              | 244.54              |
| A_68_P21138067 | chr2:35992191-35992235                            | NM_001159635:12   | Rbm18      | INSIDE                 | 0.629                                           | 0.469                            | 1495.94             | 701.46              | 0.295                            | 1171.16             | 345.47              |
| A_68_P31752099 | chr18:60720832-60720876                           | NM_025776:415     | Rbm22      | INSIDE                 | 0.313                                           | 0.499                            | 1170.38             | 583.96              | 0.156                            | 907.54              | 141.52              |
| A_68_P29007689 | chr13:46513571-46513615                           | NM_001081425:-76  | Rbm24      | PROMOTER               | 0.219                                           | 0.535                            | 1288.04             | 689.07              | 0.117                            | 1001.11             | 117.15              |
| A_68_P26260675 | chr8:129494647-129494691                          | NM_172762:311     | Rbm34      | INSIDE                 | 0.263                                           | 0.642                            | 889.38              | 570.92              | 0.169                            | 708.92              | 119.68              |
| A_68_P26260677 | chr8:129494964-129495008                          | NM_172762:-7      | Rbm34      | PROMOTER               | 0.469                                           | 0.470                            | 1410.04             | 663.32              | 0.221                            | 1205.66             | 266.11              |
| A_68_P21867219 | chr2:172847604-172847648                          | NM_019547:224     | Rbm38      | INSIDE                 | 0.513                                           | 0.711                            | 1925.78             | 1370.09             | 0.365                            | 1461.18             | 532.79              |
| A_68_P21867220 | chr2:172847673-172847717                          | NM_019547:292     | Rbm38      | INSIDE                 | 0.235                                           | 0.365                            | 2237.16             | 817.21              | 0.086                            | 1560.60             | 134.19              |
| A_68_P21769937 | chr2:156005990-156006034                          | NM_133242:-36     | Rbm39      | PROMOTER               | 0.357                                           | 0.439                            | 1650.17             | 724.25              | 0.157                            | 1330.90             | 208.68              |
| A_68_P25032745 | chr7:31435198-31435242                            | NM_133693:27      | Rbm42      | INSIDE                 | 0.411                                           | 0.643                            | 1186.15             | 762.97              | 0.264                            | 930.76              | 246.05              |
| A_68_P22281783 | chr3:82680573-82680617                            | NM_001146328:-189 | Rbm46      | PROMOTER               | 0.484                                           | 1.399                            | 1858.55             | 2600.42             | 0.678                            | 1455.68             | 986.26              |
| A_68_P31924875 | chr19:4756268-4756312                             | NM_025717:-234    | Rbm4b      | PROMOTER               | 0.492                                           | 0.689                            | 1893.55             | 1304.09             | 0.339                            | 1588.78             | 538.28              |
| A_68_P26811064 | chr9:107673153-107673200                          | NM_148930:157     | Rbm5       | INSIDE                 | 0.252                                           | 0.666                            | 1035.06             | 688.89              | 0.168                            | 748.98              | 125.57              |
| A_68_P26811065 | chr9:107673263-107673307                          | NM_148930:49      | Rbm5       | INSIDE                 | 0.261                                           | 0.581                            | 3298.25             | 1915.74             | 0.151                            | 2540.08             | 384.63              |
| A_68_P32401097 | chrX:54646265-54646313                            | NR_029425:-75     | Rbmx       | PROMOTER               | 0.128                                           | 1.422                            | 1637.78             | 2328.45             | 0.182                            | 653.37              | 118.78              |
| A_68_P32365931 | chrX:46048088-46048132                            | NM_173376:-70     | Rbmx2      | PROMOTER               | 0.376                                           | 0.657                            | 1113.81             | 731.76              | 0.247                            | 507.14              | 125.23              |
| A_68_P26758565 | chr9:98325194-98325238                            | NM_011254:1837    | Rbp1       | INSIDE                 | 0.667                                           | 0.517                            | 2718.74             | 1405.67             | 0.345                            | 2031.16             | 700.18              |
| A_68_P21817622 | chr2:164226486-164226530                          | NM_009036:-2185   | Rbpj1      | PROMOTER               | 0.149                                           | 0.562                            | 2891.71             | 1624.92             | 0.084                            | 2178.00             | 182.49              |
| A_68_P25771679 | chr8:35040712-35040756                            | NM_001042674:-421 | Rbpms      | PROMOTER               | 0.104                                           | 0.673                            | 2574.00             | 1732.31             | 0.070                            | 1861.78             | 130.03              |
| A_68_P26588674 | chr9:65477102-65477146                            | NM_028030:-1264   | Rbpms2     | PROMOTER               | 0.562                                           | 0.542                            | 1527.94             | 828.87              | 0.305                            | 1209.09             | 368.88              |
| A_68_P26588678 | chr9:65477711-65477764                            | NM_028030:-651    | Rbpms2     | PROMOTER               | 0.364                                           | 0.429                            | 1876.50             | 804.27              | 0.156                            | 1567.11             | 244.47              |
| A_68_P23328509 | chr4:134989508-134989552                          | NM_022980:190     | Rcan3      | INSIDE                 | 0.364                                           | 0.663                            | 1405.51             | 931.59              | 0.241                            | 1138.84             | 275.03              |
| A_68_P23328512 | chr4:134989887-134989933                          | NM_022980:-190    | Rcan3      | PROMOTER               | 0.393                                           | 0.620                            | 1491.84             | 925.02              | 0.244                            | 1175.09             | 286.59              |
| A_68_P23328514 | chr4:134990088-134990132                          | NM_022980:-390    | Rcan3      | PROMOTER               | 0.579                                           | 0.637                            | 1470.26             | 936.68              | 0.369                            | 1113.42             | 410.39              |
| A_68_P23328515 | chr4:134990204-134990248                          | NM_022980:-506    | Rcan3      | PROMOTER               | 0.489                                           | 0.703                            | 1738.96             | 1222.08             | 0.344                            | 1410.08             | 484.53              |
| A_68_P23311883 | chr4:131901216-131901260                          | NM_001197082:427  | Rcc1       | INSIDE                 | 0.424                                           | 0.600                            | 1049.23             | 629.95              | 0.255                            | 818.84              | 208.65              |
| A_68_P23359686 | chr4:140258987-140259035                          | NM_173867:1623    | Rcc2       | INSIDE                 | 0.203                                           | 0.601                            | 1281.87             | 770.88              | 0.122                            | 962.24              | 117.72              |
| A_68_P26533942 | chr9:55889666-55889710                            | NM_011992:37      | Rcn2       | INSIDE                 | 0.180                                           | 0.433                            | 1976.80             | 855.38              | 0.078                            | 1529.11             | 118.78              |
| A_68_P28741728 | chr12:112276886-112276930                         | NM_198023:-1100   | Rcor1      | PROMOTER               | 0.457                                           | 0.494                            | 1409.67             | 696.75              | 0.226                            | 1096.84             | 247.53              |
| A_68_P28741734 | chr12:112278458-112278502                         | NM_198023:472     | Rcor1      | INSIDE                 | 0.290                                           | 0.583                            | 1825.48             | 1065.11             | 0.169                            | 1419.55             | 240.15              |
| A_68_P20053922 | chr1:16095556-16095600                            | NM_133832:-384    | Rdh10      | DIVERGENT_PROMOTER     | 0.506                                           | 0.546                            | 1711.47             | 933.66              | 0.276                            | 1379.27             | 380.66              |
| A_68_P30350127 | chr15:76540848-76540892                           | NM_058214:119     | Recq14     | INSIDE                 | 0.511                                           | 0.668                            | 1775.08             | 1186.16             | 0.342                            | 1352.78             | 462.13              |
| A_68_P24537772 | chr6:71657975-71658019                            | NM_178608:322     | Reep1      | INSIDE                 | 0.110                                           | 0.506                            | 2540.77             | 1285.70             | 0.056                            | 2130.18             | 119.01              |

| ProbeName      | Target position of probe on CpG island microarray | TargetID            | GeneSymbol | CpG island Description | Ratio of relative methylation (TiO2-NP/Vehicle) | Sham group                       |                     |                     | TiO <sub>2</sub> -H group        |                     |                     |
|----------------|---------------------------------------------------|---------------------|------------|------------------------|-------------------------------------------------|----------------------------------|---------------------|---------------------|----------------------------------|---------------------|---------------------|
|                |                                                   |                     |            |                        |                                                 | Relative methylation (Cy-5/Cy-3) | Cy-3 signal (Input) | Cy-5 signal (MeDIP) | Relative methylation (Cy-5/Cy-3) | Cy-3 signal (Input) | Cy-5 signal (MeDIP) |
| A_68_P24537774 | chr6:71658275-71658319                            | NM_178608:622       | Reep1      | INSIDE                 | 0.172                                           | 0.446                            | 1735.98             | 773.43              | 0.077                            | 1525.65             | 116.74              |
| A_68_P27209845 | chr10:66560085-66560129                           | NM_001204915:-370   | Reep3      | PROMOTER               | 0.316                                           | 0.725                            | 1973.20             | 1431.51             | 0.229                            | 1480.80             | 338.96              |
| A_68_P27647502 | chr11:23670649-23670693                           | NM_009044:300       | Rel        | INSIDE                 | 0.486                                           | 0.652                            | 2102.83             | 1371.24             | 0.317                            | 1788.84             | 566.53              |
| A_68_P24994423 | chr7:20214968-20215012                            | NM_009046:-203      | Relb       | PROMOTER               | 0.542                                           | 0.679                            | 1367.16             | 927.81              | 0.368                            | 1126.93             | 414.69              |
| A_68_P31631094 | chr18:38115681-38115725                           | NM_153793:490       | Rel2       | INSIDE                 | 0.064                                           | 0.658                            | 3935.67             | 2591.41             | 0.042                            | 2784.17             | 117.36              |
| A_68_P23531277 | chr5:21851025-21851070                            | NM_011261:-524      | Reln       | PROMOTER               | 0.651                                           | 0.661                            | 1497.21             | 990.22              | 0.430                            | 1294.20             | 556.98              |
| A_68_P21750258 | chr2:152452780-152452824                          | NM_009047:59        | Rem1       | INSIDE                 | 0.351                                           | 0.587                            | 986.89              | 579.11              | 0.206                            | 873.31              | 179.83              |
| A_68_P21750259 | chr2:152452978-152453022                          | NM_009047:257       | Rem1       | INSIDE                 | 0.192                                           | 0.588                            | 1810.97             | 1065.00             | 0.113                            | 1342.19             | 151.80              |
| A_68_P21750261 | chr2:152453185-152453229                          | NM_009047:463       | Rem1       | INSIDE                 | 0.645                                           | 0.444                            | 1860.67             | 826.16              | 0.287                            | 1469.94             | 421.20              |
| A_68_P32465510 | chrX:71167458-71167506                            | NM_001164704:8707   | Renbp      | INSIDE                 | 0.101                                           | 2.040                            | 1651.28             | 3369.26             | 0.205                            | 574.49              | 118.03              |
| A_68_P32465511 | chrX:71167531-71167575                            | NM_001164704:8637   | Renbp      | INSIDE                 | 0.077                                           | 1.563                            | 2571.84             | 4020.36             | 0.120                            | 1067.20             | 127.67              |
| A_68_P24428256 | chr6:48551764-48551808                            | NM_001079901:7905   | Repin1     | DOWNSTREAM             | 0.097                                           | 0.571                            | 3897.33             | 2224.12             | 0.056                            | 2850.56             | 158.25              |
| A_68_P24428257 | chr6:48551937-48551981                            | NM_001079901:8077   | Repin1     | DOWNSTREAM             | 0.535                                           | 0.531                            | 4169.93             | 2214.12             | 0.284                            | 3189.15             | 905.31              |
| A_68_P23407014 | chr4:149944046-149944090                          | NM_001085492:288044 | Rere       | INSIDE                 | 0.597                                           | 0.590                            | 2454.17             | 1448.36             | 0.352                            | 1861.77             | 655.57              |
| A_68_P23820628 | chr5:77694649-77694693                            | NM_011263:152       | Rest       | INSIDE                 | 0.598                                           | 0.528                            | 1795.51             | 947.91              | 0.316                            | 1573.14             | 496.55              |
| A_68_P24785568 | chr6:118147500-118147544                          | NM_001080780:240    | Ret        | INSIDE                 | 0.094                                           | 2.388                            | 10979.76            | 26219.25            | 0.225                            | 6636.61             | 1490.45             |
| A_68_P24785569 | chr6:118147581-118147630                          | NM_001080780:157    | Ret        | INSIDE                 | 0.031                                           | 2.450                            | 3790.76             | 9288.09             | 0.077                            | 2407.56             | 184.55              |
| A_68_P27080344 | chr10:39452278-39452323                           | NM_011264:335       | Rev3l      | INSIDE                 | 0.443                                           | 0.567                            | 1488.42             | 844.16              | 0.251                            | 1117.16             | 280.88              |
| A_68_P27283982 | chr10:80023920-80023964                           | NM_025852:363       | Rexo1      | INSIDE                 | 0.524                                           | 0.385                            | 2003.75             | 771.99              | 0.202                            | 1626.95             | 328.65              |
| A_68_P27968801 | chr11:82684323-82684367                           | NM_001164570:-98    | Rfil       | PROMOTER               | 0.454                                           | 0.455                            | 1610.47             | 732.36              | 0.207                            | 1231.36             | 254.43              |
| A_68_P31985662 | chr19:17468432-17468476                           | NM_019437:-78       | Rfk        | PROMOTER               | 0.472                                           | 0.417                            | 3102.35             | 1293.67             | 0.197                            | 2617.78             | 514.97              |
| A_68_P31985663 | chr19:17468572-17468616                           | NM_019437:62        | Rfk        | INSIDE                 | 0.446                                           | 0.493                            | 2174.07             | 1070.79             | 0.219                            | 1675.67             | 367.73              |
| A_68_P26017900 | chr8:86590423-86590471                            | NM_009055:-288      | Rfx1       | PROMOTER               | 0.219                                           | 0.467                            | 1542.89             | 720.55              | 0.102                            | 1141.34             | 116.58              |
| A_68_P32044142 | chr19:28086118-28086162                           | NM_011265:-484      | Rfx3       | PROMOTER               | 0.244                                           | 0.695                            | 3564.25             | 2477.90             | 0.170                            | 2644.48             | 449.18              |
| A_68_P26628305 | chr9:72379707-72379757                            | NM_001033536:-314   | Rfx7       | PROMOTER               | 0.324                                           | 0.657                            | 823.83              | 540.96              | 0.213                            | 566.59              | 120.64              |
| A_68_P30778981 | chr16:56037605-56037649                           | NM_029092:261       | Rg9mt1     | INSIDE                 | 0.467                                           | 0.420                            | 1245.39             | 522.66              | 0.196                            | 997.37              | 195.53              |
| A_68_P20722064 | chr1:154472045-154472089                          | NM_016846:175       | Rgl1       | INSIDE                 | 0.228                                           | 0.518                            | 2141.40             | 1108.91             | 0.118                            | 1617.76             | 190.72              |
| A_68_P20722065 | chr1:154472108-154472163                          | NM_016846:106       | Rgl1       | INSIDE                 | 0.268                                           | 0.398                            | 1496.32             | 596.14              | 0.107                            | 1195.18             | 127.54              |
| A_68_P31151052 | chr17:34067414-34067462                           | NM_009059:600       | Rgl2       | INSIDE                 | 0.039                                           | 4.551                            | 5324.40             | 24230.36            | 0.179                            | 3132.35             | 559.83              |
| A_68_P31151053 | chr17:34067535-34067579                           | NM_009059:718       | Rgl2       | INSIDE                 | 0.130                                           | 2.716                            | 4198.16             | 11404.20            | 0.352                            | 2488.69             | 877.13              |
| A_68_P31067730 | chr17:15962490-15962534                           | NM_178615:1038      | Rgmb       | INSIDE                 | 0.645                                           | 0.417                            | 2151.37             | 897.58              | 0.269                            | 1632.10             | 439.16              |
| A_68_P31067774 | chr17:15967950-15967994                           | NM_178615:-4422     | Rgmb       | PROMOTER               | 0.592                                           | 0.579                            | 2910.60             | 1684.44             | 0.342                            | 2239.36             | 766.97              |
| A_68_P25510686 | chr7:135561251-135561295                          | NM_026418:414       | Rgs10      | INSIDE                 | 0.648                                           | 0.707                            | 1356.19             | 958.84              | 0.458                            | 1082.84             | 496.08              |
| A_68_P31108918 | chr17:26340491-26340535                           | NM_001081069:606    | Rgs11      | INSIDE                 | 0.504                                           | 0.612                            | 1512.53             | 925.60              | 0.309                            | 1224.05             | 377.86              |
| A_68_P31108916 | chr17:26340305-26340349                           | NM_001081069:420    | Rgs11      | INSIDE                 | 0.670                                           | 0.588                            | 1233.03             | 724.99              | 0.394                            | 1057.55             | 416.67              |
| A_68_P23597153 | chr5:35292578-35292624                            | NM_173402:504       | Rgs12      | INSIDE                 | 0.239                                           | 1.933                            | 751.95              | 1453.25             | 0.463                            | 581.31              | 268.95              |
| A_68_P21912147 | chr2:181428245-181428289                          | NM_026446:363       | Rgs19      | INSIDE                 | 0.597                                           | 0.587                            | 1635.67             | 959.55              | 0.350                            | 1612.89             | 565.09              |
| A_68_P20681326 | chr1:145851560-145851609                          | NM_009061:-305      | Rgs2       | PROMOTER               | 0.314                                           | 0.576                            | 1052.78             | 606.92              | 0.181                            | 772.29              | 139.63              |
| A_68_P20008180 | chr1:5008925-5008969                              | NM_021374:561       | Rgs20      | INSIDE                 | 0.256                                           | 0.312                            | 1988.23             | 619.88              | 0.080                            | 1559.71             | 124.60              |
| A_68_P28587835 | chr12:83718196-83718240                           | NM_015812:194       | Rgs6       | INSIDE                 | 0.637                                           | 0.584                            | 1606.29             | 937.43              | 0.372                            | 1389.97             | 517.07              |
| A_68_P29294057 | chr13:105844812-105844856                         | NM_029879:176       | Rgs7bp     | INSIDE                 | 0.252                                           | 0.459                            | 1256.61             | 576.18              | 0.116                            | 1031.29             | 119.37              |
| A_68_P20391888 | chr1:82313214-82313260                            | NM_029777:83        | Rhbd1      | INSIDE                 | 0.239                                           | 0.479                            | 1322.67             | 633.46              | 0.115                            | 1026.43             | 117.54              |
| A_68_P28160473 | chr11:116485490-116485534                         | NM_001167680:54     | Rhbd2      | INSIDE                 | 0.634                                           | 0.579                            | 1372.87             | 794.50              | 0.367                            | 1102.26             | 404.22              |
| A_68_P22312700 | chr3:88044849-88044893                            | NM_021375:13736     | Rhbg       | DOWNSTREAM             | 0.300                                           | 0.675                            | 1054.10             | 712.01              | 0.203                            | 878.09              | 177.91              |

| ProbeName      | Target position of probe on CpG island microarray | TargetID            | GeneSymbol | CpG island Description | Ratio of relative methylation (TiO2-NP/Vehicle) | Sham group                       |                     |                     | TiO <sub>2</sub> -H group        |                     |                     |
|----------------|---------------------------------------------------|---------------------|------------|------------------------|-------------------------------------------------|----------------------------------|---------------------|---------------------|----------------------------------|---------------------|---------------------|
|                |                                                   |                     |            |                        |                                                 | Relative methylation (Cy-5/Cy-3) | Cy-3 signal (Input) | Cy-5 signal (MeDIP) | Relative methylation (Cy-5/Cy-3) | Cy-3 signal (Input) | Cy-5 signal (MeDIP) |
| A_68_P22312701 | chr3:88044948-88044992                            | NM_021375:13636     | Rhbg       | DOWNSTREAM             | 0.482                                           | 0.400                            | 1768.14             | 707.26              | 0.193                            | 1340.77             | 258.59              |
| A_68_P22312702 | chr3:88045112-88045156                            | NM_021375:13472     | Rhbg       | DOWNSTREAM             | 0.352                                           | 0.647                            | 817.10              | 528.52              | 0.228                            | 713.72              | 162.42              |
| A_68_P22312797 | chr3:88058696-88058740                            | NM_021375:-112      | Rhbg       | PROMOTER               | 0.427                                           | 0.518                            | 1100.66             | 569.84              | 0.221                            | 865.57              | 191.15              |
| A_68_P25262216 | chr7:86762430-86762474                            | NM_019799:91        | Rheg       | INSIDE                 | 0.627                                           | 0.550                            | 1137.87             | 626.33              | 0.345                            | 872.04              | 301.05              |
| A_68_P23544150 | chr5:24348013-24348057                            | NM_053075:145       | Rheb       | INSIDE                 | 0.302                                           | 0.447                            | 2693.22             | 1203.31             | 0.135                            | 1930.51             | 260.66              |
| A_68_P30477113 | chr15:98711795-98711839                           | NM_026967:29        | Rheb1      | INSIDE                 | 0.590                                           | 0.638                            | 2410.21             | 1538.84             | 0.376                            | 1874.16             | 705.52              |
| A_68_P29152215 | chr13:76080947-76080991                           | NM_028493:304       | Rhobtb3    | INSIDE                 | 0.261                                           | 0.649                            | 1542.39             | 1000.33             | 0.169                            | 1357.99             | 229.92              |
| A_68_P24054149 | chr5:123591328-123591372                          | NM_175092:-8712     | Rhof       | PROMOTER               | 0.467                                           | 0.477                            | 1636.68             | 781.23              | 0.223                            | 1258.59             | 280.63              |
| A_68_P24054157 | chr5:123592214-123592258                          | NM_175092:-9598     | Rhof       | PROMOTER               | 0.275                                           | 0.734                            | 2218.10             | 1628.65             | 0.202                            | 1766.95             | 357.29              |
| A_68_P25377911 | chr7:109398265-109398309                          | NM_019566:346       | Rhog       | INSIDE                 | 0.157                                           | 0.505                            | 1887.92             | 952.76              | 0.079                            | 1453.13             | 115.33              |
| A_68_P25377920 | chr7:109399308-109399352                          | NM_019566:-698      | Rhog       | PROMOTER               | 0.379                                           | 0.677                            | 2603.19             | 1762.26             | 0.256                            | 1904.52             | 488.06              |
| A_68_P30343544 | chr15:75543867-75543911                           | NM_001163465:9171   | Rhpn1      | INSIDE                 | 0.600                                           | 2.680                            | 2917.76             | 7820.67             | 1.607                            | 2077.65             | 3339.03             |
| A_68_P25048759 | chr7:36119164-36119208                            | NM_027897:-69       | Rhpn2      | PROMOTER               | 0.296                                           | 0.480                            | 1957.54             | 939.90              | 0.142                            | 1650.02             | 234.47              |
| A_68_P25048761 | chr7:36119403-36119447                            | NM_027897:169       | Rhpn2      | INSIDE                 | 0.278                                           | 0.678                            | 1219.41             | 826.55              | 0.188                            | 828.80              | 156.00              |
| A_68_P25048763 | chr7:36119695-36119739                            | NM_027897:461       | Rhpn2      | INSIDE                 | 0.342                                           | 0.501                            | 1703.30             | 852.57              | 0.171                            | 1380.89             | 236.65              |
| A_68_P25406004 | chr7:116226565-116226609                          | NM_001038624:252    | Ric3       | INSIDE                 | 0.668                                           | 0.517                            | 1077.58             | 556.82              | 0.345                            | 787.70              | 272.01              |
| A_68_P25585273 | chr7:148043403-148043447                          | NM_053194:129       | Ric8       | INSIDE                 | 0.379                                           | 0.593                            | 1126.28             | 667.47              | 0.224                            | 898.41              | 201.57              |
| A_68_P21217119 | chr2:51928961-51929008                            | NM_175238:628       | Rif1       | INSIDE                 | 0.103                                           | 3.352                            | 1710.96             | 5735.83             | 0.345                            | 897.51              | 309.75              |
| A_68_P24061766 | chr5:124981229-124981273                          | NM_021430:150       | Rilp1      | INSIDE                 | 0.516                                           | 0.406                            | 1536.95             | 624.37              | 0.210                            | 1115.47             | 233.86              |
| A_68_P24061481 | chr5:124927981-124928025                          | NM_030259:242       | Rilp2      | INSIDE                 | 0.143                                           | 0.696                            | 3170.36             | 2206.78             | 0.100                            | 2288.85             | 227.81              |
| A_68_P30572549 | chr16:17209535-17209579                           | NM_001033338:1329   | Rimbp3     | INSIDE                 | 0.297                                           | 0.528                            | 4076.18             | 2153.37             | 0.157                            | 2939.18             | 460.39              |
| A_68_P30572550 | chr16:17209655-17209699                           | NM_001033338:1449   | Rimbp3     | INSIDE                 | 0.141                                           | 0.747                            | 4156.80             | 3106.86             | 0.106                            | 2778.69             | 293.50              |
| A_68_P30572559 | chr16:17210640-17210686                           | NM_001033338:2435   | Rimbp3     | INSIDE                 | 0.268                                           | 0.627                            | 1739.47             | 1091.01             | 0.168                            | 1341.45             | 225.66              |
| A_68_P23245808 | chr4:119165389-119165433                          | NM_177572:-207      | Rimkla     | PROMOTER               | 0.225                                           | 0.712                            | 1299.82             | 924.89              | 0.160                            | 1104.98             | 177.24              |
| A_68_P20083594 | chr1:22540800-22540844                            | NM_001012623:271741 | Rims1      | INSIDE                 | 0.335                                           | 0.662                            | 1033.37             | 683.92              | 0.222                            | 850.72              | 188.60              |
| A_68_P20085263 | chr1:22812453-22812497                            | NM_001012623:89     | Rims1      | INSIDE                 | 0.131                                           | 2.441                            | 2858.24             | 6977.07             | 0.320                            | 1868.49             | 597.44              |
| A_68_P20085267 | chr1:22813048-22813092                            | NM_001012623:-507   | Rims1      | PROMOTER               | 0.234                                           | 0.714                            | 2083.88             | 1488.27             | 0.167                            | 1498.07             | 250.84              |
| A_68_P30152564 | chr15:39028639-39028683                           | NM_053271:-1217     | Rims2      | PROMOTER               | 0.469                                           | 0.685                            | 1621.62             | 1110.15             | 0.321                            | 1135.29             | 364.41              |
| A_68_P28958208 | chr13:38129074-38129118                           | NM_024242:239       | Riok1      | INSIDE                 | 0.233                                           | 0.718                            | 3482.16             | 2499.46             | 0.168                            | 2431.95             | 407.54              |
| A_68_P22753437 | chr4:16090490-16090534                            | NM_138952:133       | Ripk2      | INSIDE                 | 0.584                                           | 0.534                            | 3360.68             | 1795.39             | 0.312                            | 2760.93             | 861.70              |
| A_68_P31000873 | chr16:97984845-97984902                           | NM_023663:489       | Ripk4      | INSIDE                 | 0.318                                           | 0.584                            | 961.88              | 561.91              | 0.186                            | 623.95              | 115.79              |
| A_68_P31000876 | chr16:97985140-97985184                           | NM_023663:200       | Ripk4      | INSIDE                 | 0.181                                           | 0.434                            | 2082.83             | 904.70              | 0.079                            | 1521.97             | 119.59              |
| A_68_P31000877 | chr16:97985236-97985280                           | NM_023663:104       | Ripk4      | INSIDE                 | 0.258                                           | 0.585                            | 1650.93             | 965.70              | 0.151                            | 1308.98             | 197.71              |
| A_68_P31000878 | chr16:97985324-97985368                           | NM_023663:16        | Ripk4      | INSIDE                 | 0.609                                           | 0.500                            | 2313.74             | 1156.23             | 0.304                            | 1915.25             | 582.80              |
| A_68_P26702535 | chr9:86910781-86910825                            | NM_001037907:431    | Ripply2    | INSIDE                 | 0.355                                           | 0.696                            | 2712.26             | 1887.62             | 0.247                            | 2398.42             | 591.77              |
| A_68_P22315262 | chr3:88520847-88520891                            | NM_001163310:93     | Rit1       | INSIDE                 | 0.420                                           | 0.670                            | 1279.17             | 857.61              | 0.281                            | 1095.06             | 308.12              |
| A_68_P22315263 | chr3:88520957-88521001                            | NM_001163310:203    | Rit1       | INSIDE                 | 0.162                                           | 0.399                            | 4190.98             | 1670.30             | 0.065                            | 3125.81             | 202.04              |
| A_68_P32575423 | chrX:101176377-101176421                          | NM_011276:225       | Rlim       | INSIDE                 | 0.137                                           | 1.409                            | 1738.02             | 2448.18             | 0.193                            | 705.74              | 136.32              |
| A_68_P32575425 | chrX:101176563-101176615                          | NM_011276:35        | Rlim       | INSIDE                 | 0.188                                           | 1.645                            | 907.54              | 1493.05             | 0.310                            | 399.65              | 123.90              |
| A_68_P29073051 | chr13:58502488-58502536                           | NR_031761:-1096     | Rmi1       | DIVERGENT_PROMOTER     | 0.314                                           | 0.444                            | 1268.57             | 563.20              | 0.139                            | 1019.57             | 142.17              |
| A_68_P29073052 | chr13:58502691-58502735                           | NR_031761:-896      | Rmi1       | DIVERGENT_PROMOTER     | 0.374                                           | 0.699                            | 1409.37             | 984.66              | 0.261                            | 1116.26             | 291.50              |
| A_68_P29073064 | chr13:58503963-58504007                           | NM_001168248:27     | Rmi1       | INSIDE                 | 0.513                                           | 0.455                            | 2328.87             | 1060.36             | 0.233                            | 1774.24             | 414.23              |
| A_68_P24536421 | chr6:71389996-71390040                            | NM_024288:613       | Rmnd5a     | INSIDE                 | 0.497                                           | 0.495                            | 2162.93             | 1071.61             | 0.246                            | 1714.27             | 422.27              |
| A_68_P24536429 | chr6:71391138-71391182                            | NM_024288:-529      | Rmnd5a     | PROMOTER               | 0.151                                           | 0.542                            | 1918.14             | 1039.65             | 0.082                            | 1435.06             | 117.56              |

| ProbeName      | Target position of probe on CpG island microarray | TargetID          | GeneSymbol | CpG island Description | Ratio of relative methylation (TiO2-NP/Vehicle) | Sham group                       |                     |                     | TiO <sub>2</sub> -H group        |                     |                     |
|----------------|---------------------------------------------------|-------------------|------------|------------------------|-------------------------------------------------|----------------------------------|---------------------|---------------------|----------------------------------|---------------------|---------------------|
|                |                                                   |                   |            |                        |                                                 | Relative methylation (Cy-5/Cy-3) | Cy-3 signal (Input) | Cy-5 signal (MeDIP) | Relative methylation (Cy-5/Cy-3) | Cy-3 signal (Input) | Cy-5 signal (MeDIP) |
| A_68_P24536430 | chr6:71391224-71391268                            | NM_024288:-615    | Rmnd5a     | PROMOTER               | 0.657                                           | 0.712                            | 1828.65             | 1301.86             | 0.468                            | 1256.83             | 587.82              |
| A_68_P26022868 | chr8:87489665-87489709                            | NM_027187:224     | Rnaseh2a   | INSIDE                 | 0.659                                           | 0.554                            | 2412.21             | 1337.52             | 0.366                            | 1650.17             | 603.15              |
| A_68_P27899668 | chr11:70051980-70052024                           | NM_173742:1352    | Rnasek     | INSIDE                 | 0.271                                           | 0.662                            | 2107.64             | 1396.09             | 0.179                            | 1454.29             | 260.82              |
| A_68_P30475880 | chr15:98507518-98507562                           | NM_172612:352     | Rnd1       | INSIDE                 | 0.500                                           | 0.509                            | 2553.07             | 1299.78             | 0.255                            | 2075.69             | 528.77              |
| A_68_P30475881 | chr15:98507653-98507697                           | NM_172612:218     | Rnd1       | INSIDE                 | 0.139                                           | 0.618                            | 2848.29             | 1759.93             | 0.086                            | 2208.97             | 189.56              |
| A_68_P28074045 | chr11:101329337-101329381                         | NM_009708:-293    | Rnd2       | DIVERGENT_PROMOTER     | 0.329                                           | 0.513                            | 1295.32             | 664.66              | 0.169                            | 1087.51             | 183.31              |
| A_68_P21212081 | chr2:51003539-51003583                            | NM_028810:1071    | Rnd3       | INSIDE                 | 0.225                                           | 0.673                            | 4864.49             | 3271.81             | 0.151                            | 3367.42             | 509.13              |
| A_68_P21212090 | chr2:51004592-51004636                            | NM_028810:17      | Rnd3       | INSIDE                 | 0.313                                           | 0.287                            | 2117.20             | 608.34              | 0.090                            | 1693.31             | 152.40              |
| A_68_P21212092 | chr2:51004822-51004866                            | NM_028810:-213    | Rnd3       | PROMOTER               | 0.396                                           | 0.586                            | 1113.91             | 653.02              | 0.232                            | 521.16              | 120.98              |
| A_68_P23201330 | chr4:109148797-109148841                          | NM_013876:292     | Rnf11      | INSIDE                 | 0.162                                           | 0.553                            | 1864.00             | 1030.94             | 0.090                            | 1367.47             | 122.82              |
| A_68_P32322124 | chrX:34731543-34731587                            | NM_153503:227     | Rnf113a1   | INSIDE                 | 0.343                                           | 1.725                            | 2033.00             | 3506.19             | 0.592                            | 837.31              | 495.53              |
| A_68_P32322125 | chrX:34731608-34731653                            | NM_153503:293     | Rnf113a1   | INSIDE                 | 0.264                                           | 1.436                            | 1448.26             | 2079.46             | 0.379                            | 565.57              | 214.43              |
| A_68_P21835806 | chr2:167317742-167317786                          | NM_030743:-380    | Rnf114     | PROMOTER               | 0.255                                           | 0.540                            | 1085.20             | 585.49              | 0.137                            | 883.32              | 121.38              |
| A_68_P21835857 | chr2:167329794-167329838                          | NM_030743:11672   | Rnf114     | INSIDE                 | 0.110                                           | 0.551                            | 2461.40             | 1355.01             | 0.061                            | 1908.26             | 115.58              |
| A_68_P27278803 | chr10:79229502-79229546                           | NM_144528:142     | Rnf126     | INSIDE                 | 0.531                                           | 0.634                            | 2469.59             | 1565.00             | 0.337                            | 1791.62             | 602.94              |
| A_68_P27278806 | chr10:79229855-79229899                           | NR_027505:-190    | Rnf126     | PROMOTER               | 0.217                                           | 0.677                            | 3395.37             | 2299.16             | 0.147                            | 2693.21             | 396.10              |
| A_68_P22165084 | chr3:57539624-57539668                            | NM_011883:-341    | Rnf13      | PROMOTER               | 0.543                                           | 0.444                            | 1615.48             | 717.98              | 0.241                            | 1336.18             | 322.20              |
| A_68_P22165085 | chr3:57539702-57539746                            | NM_011883:-263    | Rnf13      | PROMOTER               | 0.477                                           | 0.526                            | 2000.56             | 1052.59             | 0.251                            | 1715.08             | 430.87              |
| A_68_P22165088 | chr3:57540040-57540084                            | NM_011883:75      | Rnf13      | INSIDE                 | 0.194                                           | 0.571                            | 1254.86             | 716.61              | 0.111                            | 1041.16             | 115.48              |
| A_68_P31542489 | chr18:21160241-21160286                           | NM_019706:422     | Rnf138     | INSIDE                 | 0.134                                           | 0.490                            | 2635.47             | 1291.67             | 0.066                            | 1794.92             | 117.62              |
| A_68_P31542490 | chr18:21160400-21160444                           | NM_019706:581     | Rnf138     | INSIDE                 | 0.420                                           | 0.671                            | 2509.27             | 1684.57             | 0.282                            | 2009.07             | 566.87              |
| A_68_P28301679 | chr12:27099772-27099816                           | NM_001081977:327  | Rnf144a    | INSIDE                 | 0.470                                           | 0.623                            | 3090.85             | 1926.55             | 0.293                            | 2339.86             | 685.71              |
| A_68_P29011796 | chr13:47217864-47217923                           | NM_146042:-195    | Rnf144b    | PROMOTER               | 0.183                                           | 0.549                            | 1568.74             | 861.46              | 0.101                            | 1200.27             | 120.67              |
| A_68_P29011800 | chr13:47218349-47218393                           | NM_146042:282     | Rnf144b    | INSIDE                 | 0.481                                           | 0.690                            | 1064.79             | 735.20              | 0.332                            | 727.15              | 241.26              |
| A_68_P27756338 | chr11:44332144-44332188                           | NM_028862:-299    | Rnf145     | PROMOTER               | 0.186                                           | 0.637                            | 1078.96             | 687.45              | 0.119                            | 1001.17             | 118.78              |
| A_68_P20166592 | chr1:39633542-39633586                            | NM_001033135:628  | Rnf149     | INSIDE                 | 0.306                                           | 0.477                            | 1657.94             | 791.46              | 0.146                            | 1444.19             | 210.71              |
| A_68_P26011762 | chr8:85387432-85387476                            | NM_177378:200     | Rnf150     | INSIDE                 | 0.144                                           | 0.373                            | 2953.75             | 1100.78             | 0.054                            | 2359.11             | 126.34              |
| A_68_P26011763 | chr8:85387565-85387609                            | NM_177378:332     | Rnf150     | INSIDE                 | 0.449                                           | 0.656                            | 2195.76             | 1439.35             | 0.294                            | 1638.72             | 482.49              |
| A_68_P28159196 | chr11:116273617-116273661                         | NM_027258:708     | Rnf157     | INSIDE                 | 0.593                                           | 0.710                            | 1436.28             | 1019.53             | 0.421                            | 1107.91             | 466.62              |
| A_68_P24541329 | chr6:72312280-72312324                            | NM_025607:73      | Rnf181     | INSIDE                 | 0.308                                           | 0.662                            | 938.17              | 621.52              | 0.204                            | 767.13              | 156.66              |
| A_68_P28991172 | chr13:43711132-43711176                           | NM_183204:-11     | Rnf182     | PROMOTER               | 0.277                                           | 0.583                            | 891.90              | 519.95              | 0.161                            | 742.80              | 119.85              |
| A_68_P27833616 | chr11:58751821-58751865                           | NM_022423:566     | Rnf187     | INSIDE                 | 0.529                                           | 0.642                            | 846.79              | 543.99              | 0.340                            | 674.29              | 229.19              |
| A_68_P30137684 | chr15:36212197-36212241                           | NM_013923:684     | Rnf19a     | INSIDE                 | 0.527                                           | 0.559                            | 1358.96             | 759.71              | 0.295                            | 1087.80             | 320.36              |
| A_68_P23294616 | chr4:128725929-128725973                          | NM_029219:-9564   | Rnf19b     | PROMOTER               | 0.170                                           | 0.668                            | 1735.83             | 1159.41             | 0.114                            | 1393.20             | 158.41              |
| A_68_P23294682 | chr4:128735948-128735992                          | NM_029219:456     | Rnf19b     | INSIDE                 | 0.628                                           | 0.564                            | 3204.02             | 1808.51             | 0.355                            | 2596.62             | 920.73              |
| A_68_P23294683 | chr4:128736055-128736099                          | NM_029219:562     | Rnf19b     | INSIDE                 | 0.333                                           | 0.527                            | 1567.38             | 825.96              | 0.176                            | 1141.09             | 200.34              |
| A_68_P20715112 | chr1:153348264-153348308                          | NM_011277:-333    | Rnf2       | PROMOTER               | 0.600                                           | 0.662                            | 1196.30             | 791.90              | 0.397                            | 978.14              | 388.20              |
| A_68_P22906128 | chr4:49645277-49645321                            | NM_001163263:367  | Rnf20      | INSIDE                 | 0.242                                           | 0.440                            | 1702.79             | 748.41              | 0.107                            | 1139.29             | 121.41              |
| A_68_P23417944 | chr4:151687118-151687162                          | NM_001033489:5594 | Rnf207     | INSIDE                 | 0.170                                           | 0.716                            | 3158.26             | 2259.78             | 0.122                            | 2062.98             | 251.32              |
| A_68_P23417945 | chr4:151687256-151687300                          | NM_001033489:5456 | Rnf207     | INSIDE                 | 0.520                                           | 0.527                            | 1833.26             | 965.97              | 0.274                            | 1332.43             | 365.40              |
| A_68_P23417946 | chr4:151687386-151687430                          | NM_001033489:5326 | Rnf207     | INSIDE                 | 0.583                                           | 0.395                            | 1871.00             | 738.27              | 0.230                            | 1446.89             | 332.85              |
| A_68_P23417961 | chr4:151689896-151689940                          | NM_001033489:2816 | Rnf207     | INSIDE                 | 0.096                                           | 1.485                            | 1945.18             | 2888.13             | 0.142                            | 1178.34             | 167.47              |
| A_68_P26476664 | chr9:45714791-45714835                            | NM_178709:148     | Rnf214     | INSIDE                 | 0.158                                           | 0.448                            | 2329.57             | 1044.43             | 0.071                            | 1776.66             | 125.70              |
| A_68_P26476668 | chr9:45715123-45715167                            | NM_178709:-184    | Rnf214     | PROMOTER               | 0.315                                           | 0.693                            | 1634.38             | 1132.30             | 0.219                            | 1365.83             | 298.51              |

| ProbeName      | Target position of probe on CpG island microarray | TargetID         | GeneSymbol | CpG island Description | Ratio of relative methylation (TiO2-NP/Vehicle) | Sham group                       |                     |                     | TiO <sub>2</sub> -H group        |                     |                     |
|----------------|---------------------------------------------------|------------------|------------|------------------------|-------------------------------------------------|----------------------------------|---------------------|---------------------|----------------------------------|---------------------|---------------------|
|                |                                                   |                  |            |                        |                                                 | Relative methylation (Cy-5/Cy-3) | Cy-3 signal (Input) | Cy-5 signal (MeDIP) | Relative methylation (Cy-5/Cy-3) | Cy-3 signal (Input) | Cy-5 signal (MeDIP) |
| A_68_P24155046 | chr5:143874559-143874603                          | NM_080561:119    | Rnf216     | INSIDE                 | 0.287                                           | 0.548                            | 1427.99             | 782.23              | 0.157                            | 1146.26             | 180.05              |
| A_68_P27045330 | chr10:31328554-31328598                           | NM_001146349:955 | Rnf217     | INSIDE                 | 0.467                                           | 0.463                            | 2002.46             | 926.91              | 0.216                            | 1624.02             | 351.12              |
| A_68_P23233430 | chr4:116961488-116961532                          | NM_025739:208010 | Rnf220     | INSIDE                 | 0.190                                           | 0.674                            | 1272.30             | 857.73              | 0.128                            | 1015.19             | 129.73              |
| A_68_P23233548 | chr4:116977181-116977225                          | NM_025739:192318 | Rnf220     | INSIDE                 | 0.595                                           | 2.418                            | 2800.74             | 6770.84             | 1.437                            | 1868.70             | 2685.92             |
| A_68_P23234667 | chr4:117156923-117156969                          | NM_025739:12574  | Rnf220     | INSIDE                 | 0.235                                           | 0.434                            | 1231.67             | 533.99              | 0.102                            | 1145.56             | 116.51              |
| A_68_P23234771 | chr4:117169165-117169209                          | NM_025739:334    | Rnf220     | INSIDE                 | 0.357                                           | 0.406                            | 1995.83             | 810.02              | 0.145                            | 1517.42             | 219.67              |
| A_68_P21634641 | chr2:131178781-131178836                          | NM_178607:-180   | Rnf24      | PROMOTER               | 0.269                                           | 0.471                            | 1229.72             | 579.43              | 0.127                            | 936.00              | 118.59              |
| A_68_P20349521 | chr1:74647661-74647705                            | NM_021313:289    | Rnf25      | INSIDE                 | 0.175                                           | 0.607                            | 5399.84             | 3280.06             | 0.106                            | 4086.00             | 433.52              |
| A_68_P29618701 | chr14:56210506-56210552                           | NM_194346:-98    | Rnf31      | DIVERGENT_PROMOTER     | 0.257                                           | 0.490                            | 1201.07             | 588.59              | 0.126                            | 969.33              | 122.31              |
| A_68_P24052509 | chr5:123299880-123299924                          | NM_030564:-294   | Rnf34      | PROMOTER               | 0.445                                           | 0.663                            | 969.86              | 643.23              | 0.295                            | 778.82              | 230.07              |
| A_68_P24052512 | chr5:123300221-123300265                          | NM_030564:46     | Rnf34      | INSIDE                 | 0.366                                           | 0.692                            | 1037.33             | 717.42              | 0.253                            | 891.48              | 225.95              |
| A_68_P31166377 | chr17:37079998-37080042                           | NM_001099632:25  | Rnf39      | INSIDE                 | 0.419                                           | 0.577                            | 2136.79             | 1233.36             | 0.242                            | 1870.24             | 452.19              |
| A_68_P23593807 | chr5:34678844-34678888                            | NM_011278:-172   | Rnf4       | PROMOTER               | 0.621                                           | 0.616                            | 1394.05             | 859.07              | 0.383                            | 1193.81             | 457.20              |
| A_68_P23593812 | chr5:34679442-34679486                            | NM_011278:426    | Rnf4       | INSIDE                 | 0.642                                           | 0.533                            | 1152.43             | 614.50              | 0.342                            | 904.59              | 309.47              |
| A_68_P23593813 | chr5:34679537-34679581                            | NM_011278:520    | Rnf4       | INSIDE                 | 0.194                                           | 0.453                            | 1658.92             | 750.71              | 0.088                            | 1396.42             | 122.33              |
| A_68_P23593815 | chr5:34679727-34679773                            | NM_011278:712    | Rnf4       | INSIDE                 | 0.321                                           | 0.566                            | 1040.25             | 588.55              | 0.181                            | 829.14              | 150.44              |
| A_68_P25506338 | chr7:134732367-134732411                          | NM_172281:177    | Rnf40      | INSIDE                 | 0.332                                           | 0.539                            | 3684.14             | 1985.86             | 0.179                            | 2754.98             | 492.71              |
| A_68_P25506340 | chr7:134732564-134732608                          | NM_172281:375    | Rnf40      | INSIDE                 | 0.340                                           | 1.706                            | 2715.64             | 4631.89             | 0.579                            | 1880.58             | 1089.29             |
| A_68_P27541276 | chr10:127848724-127848768                         | NM_001164237:75  | Rnf41      | INSIDE                 | 0.285                                           | 0.346                            | 1482.41             | 512.45              | 0.098                            | 1202.87             | 118.41              |
| A_68_P29050859 | chr13:54795572-54795616                           | NR_027395:-273   | Rnf44      | DIVERGENT_PROMOTER     | 0.500                                           | 0.552                            | 2845.53             | 1571.61             | 0.276                            | 2362.35             | 652.97              |
| A_68_P31154741 | chr17:34740094-34740143                           | NM_019403:388    | Rnf5       | INSIDE                 | 0.194                                           | 1.967                            | 1283.64             | 2525.31             | 0.381                            | 901.01              | 343.39              |
| A_68_P31154750 | chr17:34741259-34741304                           | NM_019403:-775   | Rnf5       | DIVERGENT_PROMOTER     | 0.255                                           | 0.651                            | 2081.62             | 1354.46             | 0.166                            | 1539.66             | 255.00              |
| A_68_P31154751 | chr17:34741404-34741448                           | NM_019403:-920   | Rnf5       | DIVERGENT_PROMOTER     | 0.379                                           | 0.539                            | 1148.62             | 619.50              | 0.204                            | 897.67              | 183.55              |
| A_68_P26747275 | chr9:96378576-96378624                            | NM_011279:414    | Rnf7       | INSIDE                 | 0.272                                           | 0.621                            | 908.83              | 564.60              | 0.169                            | 723.69              | 122.09              |
| A_68_P25587156 | chr7:148354570-148354614                          | NM_001172101:-7  | Rnh1       | PROMOTER               | 0.380                                           | 0.629                            | 1970.53             | 1239.78             | 0.239                            | 1596.49             | 381.57              |
| A_68_P32075617 | chr19:33466407-33466451                           | NM_001146342:357 | Rnls       | INSIDE                 | 0.278                                           | 0.605                            | 1223.58             | 740.14              | 0.168                            | 977.74              | 164.39              |
| A_68_P27930798 | chr11:76057462-76057506                           | NM_183263:247    | Rnmt11     | INSIDE                 | 0.361                                           | 0.646                            | 1022.85             | 660.68              | 0.233                            | 792.69              | 184.63              |
| A_68_P31097159 | chr17:24551794-24551838                           | NM_001080127:197 | Rnps1      | INSIDE                 | 0.594                                           | 0.663                            | 1629.48             | 1080.65             | 0.394                            | 1406.48             | 553.71              |
| A_68_P22301214 | chr3:85946197-85946241                            | NR_004418:-1609  | Rnu73b     | PROMOTER               | 0.644                                           | 0.562                            | 960.79              | 540.23              | 0.362                            | 815.47              | 295.20              |
| A_68_P31488616 | chr18:10181915-10181959                           | NM_009071:-146   | Rock1      | PROMOTER               | 0.354                                           | 0.396                            | 1867.11             | 738.84              | 0.140                            | 1558.91             | 218.12              |
| A_68_P22957025 | chr4:59561479-59561533                            | NM_144904:730    | Rod1       | INSIDE                 | 0.107                                           | 0.559                            | 2486.69             | 1389.22             | 0.060                            | 1947.88             | 116.26              |
| A_68_P22957030 | chr4:59562123-59562167                            | NM_144904:92     | Rod1       | INSIDE                 | 0.634                                           | 0.596                            | 2044.82             | 1218.47             | 0.378                            | 1536.07             | 579.98              |
| A_68_P30513214 | chr16:5013320-5013364                             | NM_133185:304    | Rogdi      | INSIDE                 | 0.385                                           | 0.715                            | 2269.83             | 1622.83             | 0.275                            | 1581.98             | 435.04              |
| A_68_P30114432 | chr15:31383420-31383464                           | NM_145852:2      | Ropn11     | INSIDE                 | 0.572                                           | 0.367                            | 1671.99             | 614.10              | 0.210                            | 1297.00             | 272.53              |
| A_68_P26605676 | chr9:68502227-68502277                            | NM_013646:644    | Rora       | INSIDE                 | 0.138                                           | 0.712                            | 1565.16             | 1113.89             | 0.098                            | 1176.29             | 115.52              |
| A_68_P26605678 | chr9:68502422-68502466                            | NM_013646:836    | Rora       | INSIDE                 | 0.363                                           | 0.530                            | 2074.71             | 1099.56             | 0.193                            | 1711.75             | 329.55              |
| A_68_P26609890 | chr9:69138794-69138840                            | NM_013646:637208 | Rora       | INSIDE                 | 0.374                                           | 0.598                            | 1305.17             | 780.20              | 0.223                            | 1018.95             | 227.73              |
| A_68_P26609891 | chr9:69138894-69138938                            | NM_013646:637308 | Rora       | INSIDE                 | 0.409                                           | 0.527                            | 2100.37             | 1107.77             | 0.215                            | 1636.20             | 352.54              |
| A_68_P23313958 | chr4:132324242-132324286                          | NM_011284:-10    | Rpa2       | PROMOTER               | 0.235                                           | 0.623                            | 1899.16             | 1182.91             | 0.146                            | 1397.23             | 204.59              |
| A_68_P23313959 | chr4:132324309-132324353                          | NM_011284:56     | Rpa2       | INSIDE                 | 0.227                                           | 1.401                            | 2229.35             | 3122.60             | 0.318                            | 1580.26             | 503.03              |
| A_68_P23313962 | chr4:132324543-132324587                          | NM_011284:290    | Rpa2       | INSIDE                 | 0.196                                           | 0.603                            | 3888.61             | 2346.23             | 0.119                            | 2862.84             | 339.39              |
| A_68_P24225084 | chr6:8209188-8209232                              | NM_026632:-69    | Rpa3       | DIVERGENT_PROMOTER     | 0.102                                           | 1.348                            | 4137.62             | 5578.65             | 0.138                            | 2556.86             | 352.94              |
| A_68_P20304094 | chr1:66747456-66747500                            | NM_025683:12     | Rpe        | INSIDE                 | 0.608                                           | 0.534                            | 1472.35             | 785.78              | 0.325                            | 1219.74             | 395.84              |
| A_68_P20304095 | chr1:66747574-66747618                            | NM_025683:130    | Rpe        | INSIDE                 | 0.489                                           | 0.364                            | 2463.11             | 897.32              | 0.178                            | 2142.67             | 381.80              |

| ProbeName      | Target position of probe on CpG island microarray | TargetID          | GeneSymbol | CpG island Description | Ratio of relative methylation (TiO2-NP/Vehicle) | Sham group                       |                     |                     | TiO <sub>2</sub> -H group        |                     |                     |
|----------------|---------------------------------------------------|-------------------|------------|------------------------|-------------------------------------------------|----------------------------------|---------------------|---------------------|----------------------------------|---------------------|---------------------|
|                |                                                   |                   |            |                        |                                                 | Relative methylation (Cy-5/Cy-3) | Cy-3 signal (Input) | Cy-5 signal (MeDIP) | Relative methylation (Cy-5/Cy-3) | Cy-3 signal (Input) | Cy-5 signal (MeDIP) |
| A_68_P22615129 | chr3:146183762-146183806                          | NM_027371:603     | Rpl1       | INSIDE                 | 0.305                                           | 0.649                            | 994.91              | 646.00              | 0.198                            | 927.29              | 183.38              |
| A_68_P22615131 | chr3:146184129-146184173                          | NM_027371:237     | Rpl1       | INSIDE                 | 0.232                                           | 0.683                            | 1735.20             | 1185.85             | 0.159                            | 1443.96             | 229.10              |
| A_68_P29604814 | chr14:52738859-52738903                           | NM_001168515:8303 | Rpgrip1    | INSIDE                 | 0.372                                           | 0.434                            | 1490.82             | 647.28              | 0.162                            | 1149.00             | 185.61              |
| A_68_P24533018 | chr6:70741721-70741765                            | NM_009075:427     | Rpia       | INSIDE                 | 0.173                                           | 0.510                            | 2330.13             | 1188.80             | 0.088                            | 1759.33             | 155.01              |
| A_68_P26237918 | chr8:125626137-125626182                          | NM_016738:-90     | Rpl13      | PROMOTER               | 0.372                                           | 0.569                            | 1555.77             | 885.91              | 0.212                            | 1140.64             | 241.46              |
| A_68_P25091294 | chr7:52384091-52384135                            | NM_009438:-7      | Rpl13a     | PROMOTER               | 0.215                                           | 0.508                            | 1412.29             | 716.96              | 0.109                            | 1088.05             | 118.93              |
| A_68_P25091295 | chr7:52384233-52384280                            | NM_009438:-151    | Rpl13a     | PROMOTER               | 0.323                                           | 0.453                            | 1250.08             | 566.51              | 0.146                            | 818.09              | 119.58              |
| A_68_P25091298 | chr7:52384568-52384612                            | NM_009438:-485    | Rpl13a     | PROMOTER               | 0.321                                           | 0.469                            | 1320.06             | 619.18              | 0.151                            | 1028.48             | 154.80              |
| A_68_P24170315 | chr5:147644587-147644631                          | NM_019647:143     | Rpl21      | INSIDE                 | 0.273                                           | 0.428                            | 1357.42             | 580.44              | 0.117                            | 1039.87             | 121.44              |
| A_68_P28052672 | chr11:97643844-97643889                           | NM_022891:-113    | Rpl23      | PROMOTER               | 0.398                                           | 0.606                            | 1390.97             | 842.99              | 0.241                            | 1054.91             | 254.30              |
| A_68_P27891995 | chr11:68714810-68714854                           | NM_009080:-235    | Rpl26      | PROMOTER               | 0.398                                           | 0.694                            | 3449.52             | 2393.87             | 0.276                            | 2457.62             | 679.51              |
| A_68_P28073901 | chr11:101303846-101303890                         | NM_011289:310     | Rpl27      | INSIDE                 | 0.273                                           | 0.501                            | 1070.54             | 536.15              | 0.137                            | 879.78              | 120.31              |
| A_68_P25408483 | chr7:116662453-116662497                          | NM_011975:-234    | Rpl27a     | PROMOTER               | 0.324                                           | 0.709                            | 2713.74             | 1924.57             | 0.230                            | 1975.60             | 454.47              |
| A_68_P25408484 | chr7:116662619-116662663                          | NM_011975:-68     | Rpl27a     | PROMOTER               | 0.513                                           | 0.618                            | 1778.81             | 1099.42             | 0.317                            | 1300.08             | 411.92              |
| A_68_P24950541 | chr7:4744529-4744573                              | NM_009081:-16     | Rpl28      | DIVERGENT_PROMOTER     | 0.476                                           | 0.725                            | 1844.12             | 1336.34             | 0.345                            | 1373.30             | 474.08              |
| A_68_P30128575 | chr15:34372745-34372789                           | NM_009083:214     | Rpl30      | INSIDE                 | 0.422                                           | 0.412                            | 1394.28             | 574.75              | 0.174                            | 1238.70             | 215.54              |
| A_68_P30128578 | chr15:34373065-34373109                           | NM_001163485:-55  | Rpl30      | DIVERGENT_PROMOTER     | 0.148                                           | 0.543                            | 1890.07             | 1027.02             | 0.081                            | 1500.12             | 121.03              |
| A_68_P20165368 | chr1:39425278-39425322                            | NM_053257:605     | Rpl31      | INSIDE                 | 0.191                                           | 1.493                            | 6710.42             | 10020.69            | 0.286                            | 4482.70             | 1281.82             |
| A_68_P21151628 | chr2:38860218-38860262                            | NM_025592:411     | Rpl35      | INSIDE                 | 0.100                                           | 0.656                            | 3001.82             | 1968.35             | 0.066                            | 2335.39             | 153.75              |
| A_68_P30655991 | chr16:33056419-33056463                           | NM_001130485:-98  | Rpl35a     | DIVERGENT_PROMOTER     | 0.318                                           | 0.467                            | 1287.12             | 601.27              | 0.149                            | 957.31              | 142.25              |
| A_68_P30655996 | chr16:33056959-33057003                           | NM_021338:381     | Rpl35a     | INSIDE                 | 0.331                                           | 0.584                            | 1016.65             | 593.81              | 0.193                            | 742.77              | 143.60              |
| A_68_P31257289 | chr17:56753149-56753198                           | NM_018730:356     | Rpl36      | INSIDE                 | 0.100                                           | 0.657                            | 2368.40             | 1555.93             | 0.066                            | 1774.54             | 116.93              |
| A_68_P31257290 | chr17:56753266-56753310                           | NM_018730:471     | Rpl36      | INSIDE                 | 0.318                                           | 0.500                            | 1535.88             | 768.11              | 0.159                            | 1069.97             | 170.13              |
| A_68_P32672687 | chrX:131120488-131120543                          | NM_019865:323     | Rpl36a     | INSIDE                 | 0.124                                           | 2.125                            | 1292.59             | 2746.20             | 0.264                            | 453.43              | 119.72              |
| A_68_P32672688 | chrX:131120583-131120633                          | NM_019865:416     | Rpl36a     | INSIDE                 | 0.214                                           | 1.483                            | 1086.35             | 1610.71             | 0.317                            | 406.96              | 128.91              |
| A_68_P32672689 | chrX:131120700-131120748                          | NM_019865:532     | Rpl36a     | INSIDE                 | 0.113                                           | 1.830                            | 1594.58             | 2918.44             | 0.206                            | 565.96              | 116.71              |
| A_68_P28513220 | chr12:70284706-70284750                           | NM_025589:326     | Rpl36al    | INSIDE                 | 0.177                                           | 0.702                            | 1282.42             | 900.25              | 0.124                            | 998.76              | 123.94              |
| A_68_P28513223 | chr12:70285038-70285082                           | NM_025589:-6      | Rpl36al    | DIVERGENT_PROMOTER     | 0.084                                           | 0.690                            | 2835.31             | 1956.33             | 0.058                            | 2031.47             | 118.31              |
| A_68_P29982086 | chr15:5066083-5066136                             | NM_026069:-503    | Rpl37      | DIVERGENT_PROMOTER     | 0.251                                           | 0.503                            | 1450.34             | 729.04              | 0.126                            | 1017.12             | 128.52              |
| A_68_P29982088 | chr15:5066265-5066309                             | NM_026069:-326    | Rpl37      | DIVERGENT_PROMOTER     | 0.266                                           | 0.347                            | 1734.07             | 602.29              | 0.092                            | 1268.43             | 117.01              |
| A_68_P29982091 | chr15:5066504-5066548                             | NM_026069:-86     | Rpl37      | DIVERGENT_PROMOTER     | 0.660                                           | 0.527                            | 1313.48             | 692.63              | 0.348                            | 1118.21             | 389.18              |
| A_68_P28149048 | chr11:114530351-114530395                         | NM_001048058:278  | Rpl38      | INSIDE                 | 0.238                                           | 0.607                            | 1349.48             | 819.36              | 0.145                            | 1087.82             | 157.45              |
| A_68_P32321655 | chrX:34625187-34625231                            | NM_026055:-29     | Rpl39      | PROMOTER               | 0.077                                           | 1.761                            | 2145.06             | 3777.63             | 0.135                            | 881.35              | 118.80              |
| A_68_P27541975 | chr10:127986066-127986114                         | NM_018860:134     | Rpl41      | INSIDE                 | 0.053                                           | 1.609                            | 2185.75             | 3517.88             | 0.085                            | 1372.94             | 116.61              |
| A_68_P24043181 | chr5:121654660-121654704                          | NM_011290:173     | Rpl6       | INSIDE                 | 0.095                                           | 0.538                            | 2971.47             | 1598.61             | 0.051                            | 2277.71             | 116.39              |
| A_68_P24043182 | chr5:121654805-121654849                          | NM_011290:317     | Rpl6       | INSIDE                 | 0.416                                           | 0.525                            | 1530.53             | 802.85              | 0.218                            | 1243.30             | 271.58              |
| A_68_P24043184 | chr5:121654997-121655041                          | NM_011290:509     | Rpl6       | INSIDE                 | 0.535                                           | 0.663                            | 1199.86             | 795.04              | 0.354                            | 982.68              | 348.03              |
| A_68_P30351089 | chr15:76734484-76734528                           | NM_012053:6       | Rpl8       | INSIDE                 | 0.216                                           | 2.013                            | 4053.37             | 8160.62             | 0.434                            | 2534.05             | 1100.09             |
| A_68_P30351090 | chr15:76734597-76734641                           | NM_012053:118     | Rpl8       | INSIDE                 | 0.235                                           | 1.752                            | 3291.12             | 5766.71             | 0.412                            | 2381.31             | 980.56              |
| A_68_P30351093 | chr15:76734840-76734884                           | NM_012053:362     | Rpl8       | INSIDE                 | 0.266                                           | 0.623                            | 1058.14             | 658.88              | 0.166                            | 738.40              | 122.43              |
| A_68_P26567740 | chr9:61761969-61762013                            | NM_018853:327     | Rplp1      | INSIDE                 | 0.431                                           | 0.585                            | 2880.40             | 1683.88             | 0.252                            | 2159.08             | 544.13              |
| A_68_P26567741 | chr9:61762053-61762098                            | NM_018853:242     | Rplp1      | INSIDE                 | 0.368                                           | 0.673                            | 2655.14             | 1786.03             | 0.247                            | 2042.06             | 505.38              |
| A_68_P26567746 | chr9:61762612-61762656                            | NM_018853:-317    | Rplp1      | PROMOTER               | 0.209                                           | 0.563                            | 2224.76             | 1252.02             | 0.118                            | 1738.35             | 204.80              |
| A_68_P25588866 | chr7:148633186-148633239                          | NM_026020:-336    | Rplp2      | DIVERGENT_PROMOTER     | 0.400                                           | 0.587                            | 1498.29             | 879.31              | 0.235                            | 1091.39             | 255.97              |



| ProbeName      | Target position of probe on CpG island microarray | TargetID          | GeneSymbol | CpG island Description | Ratio of relative methylation (TiO2-NP/Vehicle) | Sham group                       |                     |                     | TiO <sub>2</sub> -H group        |                     |                     |
|----------------|---------------------------------------------------|-------------------|------------|------------------------|-------------------------------------------------|----------------------------------|---------------------|---------------------|----------------------------------|---------------------|---------------------|
|                |                                                   |                   |            |                        |                                                 | Relative methylation (Cy-5/Cy-3) | Cy-3 signal (Input) | Cy-5 signal (MeDIP) | Relative methylation (Cy-5/Cy-3) | Cy-3 signal (Input) | Cy-5 signal (MeDIP) |
| A_68_P31560661 | chr18:24687904-24687948                           | NM_144861:779     | Rprd1a     | INSIDE                 | 0.283                                           | 0.622                            | 1662.70             | 1033.75             | 0.176                            | 1292.73             | 227.47              |
| A_68_P31560663 | chr18:24688162-24688206                           | NM_144861:521     | Rprd1a     | INSIDE                 | 0.402                                           | 0.580                            | 1300.04             | 753.96              | 0.233                            | 1070.85             | 249.46              |
| A_68_P31560664 | chr18:24688268-24688312                           | NM_144861:415     | Rprd1a     | INSIDE                 | 0.352                                           | 0.523                            | 1270.97             | 664.86              | 0.184                            | 1047.90             | 192.85              |
| A_68_P21780562 | chr2:157854036-157854080                          | NM_027434:-471    | Rprd1b     | PROMOTER               | 0.270                                           | 0.435                            | 1452.64             | 632.44              | 0.118                            | 1121.18             | 131.91              |
| A_68_P21780568 | chr2:157854743-157854787                          | NM_027434:235     | Rprd1b     | INSIDE                 | 0.509                                           | 0.595                            | 2441.06             | 1452.79             | 0.303                            | 1892.12             | 573.15              |
| A_68_P22345831 | chr3:95622735-95622779                            | NM_001081293:120  | Rprd2      | INSIDE                 | 0.493                                           | 0.687                            | 2580.20             | 1771.66             | 0.339                            | 1837.65             | 622.59              |
| A_68_P22345833 | chr3:95622982-95623029                            | NM_001081293:-129 | Rprd2      | PROMOTER               | 0.229                                           | 0.515                            | 2375.11             | 1222.59             | 0.118                            | 1766.61             | 208.20              |
| A_68_P22345836 | chr3:95623356-95623400                            | NM_001081293:-502 | Rprd2      | PROMOTER               | 0.658                                           | 0.625                            | 918.79              | 574.31              | 0.411                            | 845.16              | 347.61              |
| A_68_P22345837 | chr3:95623518-95623562                            | NM_001081293:-664 | Rprd2      | PROMOTER               | 0.610                                           | 0.691                            | 1853.12             | 1280.45             | 0.422                            | 1463.67             | 617.43              |
| A_68_P21227533 | chr2:53937683-53937727                            | NM_023396:259     | Rprm       | INSIDE                 | 0.271                                           | 0.421                            | 1379.77             | 581.23              | 0.114                            | 1078.45             | 123.26              |
| A_68_P31117588 | chr17:27771794-27771838                           | NM_025963:371     | Rps10      | INSIDE                 | 0.292                                           | 0.554                            | 999.66              | 554.01              | 0.162                            | 735.73              | 119.24              |
| A_68_P27005216 | chr10:23507028-23507072                           | NM_011295:-35     | Rps12      | DIVERGENT_PROMOTER     | 0.227                                           | 0.325                            | 1968.49             | 640.42              | 0.074                            | 1604.57             | 118.75              |
| A_68_P31753488 | chr18:60934010-60934054                           | NM_020600:-217    | Rps14      | PROMOTER               | 0.362                                           | 0.383                            | 1605.60             | 615.28              | 0.139                            | 1190.38             | 165.27              |
| A_68_P31753490 | chr18:60934321-60934365                           | NM_020600:93      | Rps14      | INSIDE                 | 0.441                                           | 0.608                            | 1030.88             | 626.42              | 0.268                            | 766.85              | 205.72              |
| A_68_P27282239 | chr10:79755107-79755151                           | NM_009091:-47     | Rps15      | PROMOTER               | 0.617                                           | 0.562                            | 1324.96             | 744.01              | 0.346                            | 943.82              | 326.75              |
| A_68_P27282240 | chr10:79755289-79755333                           | NM_009091:135     | Rps15      | INSIDE                 | 0.535                                           | 0.667                            | 1450.87             | 967.98              | 0.357                            | 1121.97             | 400.75              |
| A_68_P25021324 | chr7:29135677-29135721                            | NM_013647:-9      | Rps16      | PROMOTER               | 0.192                                           | 0.697                            | 2240.25             | 1562.32             | 0.134                            | 1498.69             | 200.78              |
| A_68_P25007067 | chr7:25669258-25669302                            | NM_023133:-452    | Rps19      | PROMOTER               | 0.318                                           | 0.571                            | 1920.01             | 1096.01             | 0.182                            | 1364.94             | 247.75              |
| A_68_P25007068 | chr7:25669351-25669396                            | NM_023133:-359    | Rps19      | PROMOTER               | 0.647                                           | 0.695                            | 2395.65             | 1665.50             | 0.450                            | 1762.43             | 793.30              |
| A_68_P26467468 | chr9:44215837-44215881                            | NM_024266:62      | Rps25      | INSIDE                 | 0.545                                           | 0.472                            | 3137.36             | 1480.95             | 0.257                            | 2248.34             | 578.92              |
| A_68_P32567638 | chrX:99384443-99384487                            | NM_009094:-754    | Rps4x      | PROMOTER               | 0.142                                           | 1.502                            | 1346.64             | 2022.92             | 0.214                            | 561.33              | 120.06              |
| A_68_P31024850 | chr17:7374080-7374124                             | NM_011299:-361    | Rps6ka2    | PROMOTER               | 0.160                                           | 0.483                            | 2850.15             | 1375.90             | 0.077                            | 2241.33             | 173.47              |
| A_68_P31024851 | chr17:7374165-7374209                             | NM_011299:-277    | Rps6ka2    | PROMOTER               | 0.446                                           | 0.713                            | 3137.62             | 2236.78             | 0.318                            | 2286.50             | 726.99              |
| A_68_P31024853 | chr17:7374468-7374512                             | NM_011299:27      | Rps6ka2    | INSIDE                 | 0.474                                           | 0.528                            | 1322.33             | 697.66              | 0.250                            | 1141.11             | 285.31              |
| A_68_P32773804 | chrX:155693758-155693802                          | NM_148945:-271    | Rps6ka3    | PROMOTER               | 0.530                                           | 3.452                            | 4698.70             | 16218.21            | 1.829                            | 2372.12             | 4339.42             |
| A_68_P32773807 | chrX:155694248-155694292                          | NM_148945:219     | Rps6ka3    | INSIDE                 | 0.065                                           | 1.597                            | 3251.45             | 5192.77             | 0.104                            | 1141.61             | 118.64              |
| A_68_P31936299 | chr19:6904994-6905038                             | NM_019924:10075   | Rps6ka4    | INSIDE                 | 0.651                                           | 0.447                            | 1447.70             | 646.70              | 0.291                            | 1061.00             | 308.55              |
| A_68_P31936308 | chr19:6906036-6906086                             | NM_019924:9031    | Rps6ka4    | INSIDE                 | 0.539                                           | 3.598                            | 2399.74             | 8634.04             | 1.940                            | 1578.13             | 3060.96             |
| A_68_P31936365 | chr19:6914837-6914881                             | NM_019924:233     | Rps6ka4    | INSIDE                 | 0.134                                           | 0.578                            | 2018.64             | 1167.04             | 0.078                            | 1500.59             | 116.39              |
| A_68_P28683722 | chr12:101962780-101962824                         | NM_153587:436     | Rps6ka5    | INSIDE                 | 0.391                                           | 0.589                            | 1867.99             | 1100.53             | 0.230                            | 1460.70             | 336.55              |
| A_68_P28683724 | chr12:101963187-101963231                         | NM_153587:30      | Rps6ka5    | INSIDE                 | 0.490                                           | 0.480                            | 2493.49             | 1195.92             | 0.235                            | 2088.58             | 491.28              |
| A_68_P32599603 | chrX:108577244-108577288                          | NM_025949:74288   | Rps6ka6    | INSIDE                 | 0.479                                           | 0.559                            | 1003.25             | 560.77              | 0.268                            | 437.18              | 117.08              |
| A_68_P27989555 | chr11:86358098-86358142                           | NM_001114334:189  | Rps6kb1    | INSIDE                 | 0.513                                           | 0.518                            | 1411.96             | 731.79              | 0.266                            | 1152.60             | 306.25              |
| A_68_P24946916 | chr7:3655703-3655755                              | NM_029767:86      | Rps9       | INSIDE                 | 0.149                                           | 0.670                            | 1740.31             | 1165.76             | 0.100                            | 1222.34             | 121.70              |
| A_68_P24946917 | chr7:3655779-3655833                              | NM_029767:164     | Rps9       | INSIDE                 | 0.180                                           | 0.571                            | 1422.66             | 812.06              | 0.103                            | 1166.18             | 120.11              |
| A_68_P21567499 | chr2:118860959-118861006                          | NM_173450:457     | Rpusd2     | INSIDE                 | 0.285                                           | 0.431                            | 1203.70             | 518.34              | 0.123                            | 946.80              | 116.40              |
| A_68_P20348978 | chr1:74551985-74552034                            | NM_021383:-624    | Rqed1      | PROMOTER               | 0.154                                           | 0.670                            | 1504.09             | 1007.87             | 0.103                            | 1193.56             | 123.26              |
| A_68_P20348981 | chr1:74552352-74552396                            | NM_021383:-259    | Rqed1      | PROMOTER               | 0.252                                           | 0.664                            | 2065.16             | 1371.79             | 0.168                            | 1351.71             | 226.66              |
| A_68_P20348983 | chr1:74552547-74552591                            | NM_021383:-65     | Rqed1      | PROMOTER               | 0.382                                           | 0.440                            | 3658.22             | 1610.76             | 0.168                            | 2627.28             | 441.91              |
| A_68_P20348986 | chr1:74552917-74552961                            | NM_021383:305     | Rqed1      | INSIDE                 | 0.119                                           | 0.604                            | 3884.63             | 2347.81             | 0.072                            | 2909.90             | 209.55              |
| A_68_P20348987 | chr1:74553038-74553082                            | NM_021383:427     | Rqed1      | INSIDE                 | 0.410                                           | 0.622                            | 1929.98             | 1200.79             | 0.255                            | 1468.88             | 374.64              |
| A_68_P23080556 | chr4:86221599-86221643                            | NM_178376:44      | Rraga      | INSIDE                 | 0.235                                           | 0.491                            | 1057.19             | 518.78              | 0.115                            | 995.50              | 114.97              |
| A_68_P25434394 | chr7:121261406-121261450                          | NM_025846:-133    | Rras2      | PROMOTER               | 0.409                                           | 0.699                            | 1787.85             | 1250.07             | 0.286                            | 1426.98             | 408.44              |
| A_68_P21704900 | chr2:143837439-143837493                          | NM_024281:-467    | Rrbp1      | PROMOTER               | 0.249                                           | 0.608                            | 879.19              | 534.45              | 0.151                            | 813.55              | 123.01              |

| ProbeName      | Target position of probe on CpG island microarray | TargetID           | GeneSymbol | CpG island Description | Ratio of relative methylation (TiO2-NP/Vehicle) | Sham group                       |                     |                     | TiO <sub>2</sub> -H group        |                     |                     |
|----------------|---------------------------------------------------|--------------------|------------|------------------------|-------------------------------------------------|----------------------------------|---------------------|---------------------|----------------------------------|---------------------|---------------------|
|                |                                                   |                    |            |                        |                                                 | Relative methylation (Cy-5/Cy-3) | Cy-3 signal (Input) | Cy-5 signal (MeDIP) | Relative methylation (Cy-5/Cy-3) | Cy-3 signal (Input) | Cy-5 signal (MeDIP) |
| A_68_P28956734 | chr13:37918572-37918616                           | NM_001177868:-186  | Rreb1      | PROMOTER               | 0.294                                           | 0.423                            | 4304.25             | 1818.77             | 0.124                            | 3030.87             | 376.08              |
| A_68_P25378791 | chr7:109590355-109590403                          | NM_009103:170      | Rrm1       | INSIDE                 | 0.239                                           | 0.573                            | 1106.47             | 633.78              | 0.137                            | 878.19              | 120.27              |
| A_68_P25378792 | chr7:109590509-109590553                          | NM_009103:322      | Rrm1       | INSIDE                 | 0.273                                           | 0.658                            | 1384.13             | 911.23              | 0.180                            | 903.12              | 162.28              |
| A_68_P25378793 | chr7:109590580-109590624                          | NM_009103:394      | Rrm1       | INSIDE                 | 0.456                                           | 0.540                            | 6626.39             | 3578.50             | 0.246                            | 4678.80             | 1151.19             |
| A_68_P28291145 | chr12:25393139-25393183                           | NM_009104:42       | Rrm2       | INSIDE                 | 0.237                                           | 0.429                            | 2583.12             | 1107.31             | 0.101                            | 1970.28             | 199.87              |
| A_68_P28291147 | chr12:25393381-25393425                           | NM_009104:284      | Rrm2       | INSIDE                 | 0.386                                           | 0.626                            | 2599.15             | 1627.70             | 0.242                            | 1944.45             | 469.87              |
| A_68_P28291148 | chr12:25393461-25393505                           | NM_009104:364      | Rrm2       | INSIDE                 | 0.625                                           | 0.701                            | 1467.99             | 1029.07             | 0.438                            | 1087.94             | 476.86              |
| A_68_P28291149 | chr12:25393568-25393620                           | NM_009104:476      | Rrm2       | INSIDE                 | 0.148                                           | 0.719                            | 1770.14             | 1272.33             | 0.106                            | 1182.39             | 125.76              |
| A_68_P30146825 | chr15:37890467-37890516                           | NM_199476:319      | Rrm2b      | INSIDE                 | 0.118                                           | 0.694                            | 2097.80             | 1456.49             | 0.082                            | 1460.65             | 119.90              |
| A_68_P30146826 | chr15:37890566-37890610                           | NM_199476:222      | Rrm2b      | INSIDE                 | 0.561                                           | 0.592                            | 2331.50             | 1379.43             | 0.332                            | 1642.59             | 545.08              |
| A_68_P30146831 | chr15:37891066-37891112                           | NM_199476:-278     | Rrm2b      | PROMOTER               | 0.533                                           | 0.634                            | 998.11              | 632.36              | 0.338                            | 902.89              | 304.89              |
| A_68_P30558909 | chr16:13780665-13780710                           | NM_001039521:-104  | Rrm3       | PROMOTER               | 0.150                                           | 0.610                            | 1611.25             | 982.63              | 0.092                            | 1332.71             | 122.28              |
| A_68_P27274091 | chr10:77875465-77875509                           | NM_010925:302      | Rrp1       | INSIDE                 | 0.100                                           | 0.543                            | 3127.89             | 1699.28             | 0.055                            | 2218.82             | 121.00              |
| A_68_P32117790 | chr19:41970534-41970578                           | NM_199447:87       | Rrp12      | INSIDE                 | 0.096                                           | 1.475                            | 5616.48             | 8284.03             | 0.141                            | 3624.66             | 511.70              |
| A_68_P25394039 | chr7:112885744-112885788                          | NM_133951:133      | Rrp8       | INSIDE                 | 0.451                                           | 0.447                            | 1606.94             | 718.98              | 0.202                            | 1312.88             | 264.64              |
| A_68_P26803653 | chr9:106379642-106379686                          | NM_145620:25       | Rrp9       | INSIDE                 | 0.503                                           | 0.511                            | 1815.86             | 927.42              | 0.257                            | 1356.06             | 348.63              |
| A_68_P20022705 | chr1:9535306-9535350                              | NM_021511:-160     | Rrs1       | PROMOTER               | 0.634                                           | 0.525                            | 1044.51             | 548.22              | 0.333                            | 846.96              | 281.96              |
| A_68_P28033654 | chr11:94410127-94410174                           | NM_001013381:371   | Rsad1      | INSIDE                 | 0.322                                           | 0.576                            | 1069.18             | 615.52              | 0.186                            | 777.58              | 144.35              |
| A_68_P22388655 | chr3:103718078-103718124                          | NM_172684:58       | Rsb1       | INSIDE                 | 0.592                                           | 0.308                            | 1704.85             | 525.40              | 0.183                            | 1451.51             | 264.92              |
| A_68_P22388660 | chr3:103718569-103718613                          | NM_172684:548      | Rsb1       | INSIDE                 | 0.305                                           | 0.619                            | 849.22              | 525.31              | 0.189                            | 611.07              | 115.40              |
| A_68_P23523572 | chr5:20457823-20457867                            | NM_001080977:-204  | Rsb1l1     | PROMOTER               | 0.221                                           | 0.564                            | 1162.73             | 655.66              | 0.124                            | 995.22              | 123.80              |
| A_68_P23523573 | chr5:20457890-20457941                            | NM_001080977:-275  | Rsb1l1     | PROMOTER               | 0.261                                           | 0.601                            | 951.08              | 571.17              | 0.157                            | 736.57              | 115.32              |
| A_68_P25351155 | chr7:104728838-104728882                          | NM_001081267:455   | Rsf1       | INSIDE                 | 0.501                                           | 0.578                            | 2138.36             | 1236.69             | 0.290                            | 1872.34             | 542.59              |
| A_68_P30546792 | chr16:11203231-11203275                           | NM_025546:133      | Rsl1d1     | INSIDE                 | 0.253                                           | 0.698                            | 2707.74             | 1889.84             | 0.177                            | 2152.81             | 380.38              |
| A_68_P30546793 | chr16:11203333-11203377                           | NM_025546:31       | Rsl1d1     | INSIDE                 | 0.144                                           | 0.673                            | 1570.09             | 1056.73             | 0.097                            | 1216.18             | 118.06              |
| A_68_P31138742 | chr17:31413976-31414020                           | NM_025290:303      | Rsph1      | INSIDE                 | 0.278                                           | 0.483                            | 1230.30             | 594.82              | 0.135                            | 968.81              | 130.39              |
| A_68_P23271479 | chr4:124664198-124664242                          | NM_138683:547      | Rspo1      | INSIDE                 | 0.286                                           | 1.542                            | 9361.65             | 14434.57            | 0.442                            | 6803.05             | 3005.24             |
| A_68_P23271482 | chr4:124664450-124664494                          | NM_138683:799      | Rspo1      | INSIDE                 | 0.589                                           | 0.534                            | 1364.90             | 729.21              | 0.314                            | 1093.02             | 343.75              |
| A_68_P23271503 | chr4:124667328-124667372                          | NM_138683:3677     | Rspo1      | INSIDE                 | 0.068                                           | 1.366                            | 4346.41             | 5935.84             | 0.092                            | 2711.92             | 250.02              |
| A_68_P23271505 | chr4:124667492-124667536                          | NM_138683:3841     | Rspo1      | INSIDE                 | 0.156                                           | 0.622                            | 1647.29             | 1024.08             | 0.097                            | 1286.56             | 124.97              |
| A_68_P22207931 | chr3:66789980-66790024                            | NM_025822:409      | Rsrc1      | INSIDE                 | 0.223                                           | 0.484                            | 1667.13             | 806.64              | 0.108                            | 1515.52             | 163.79              |
| A_68_P24057380 | chr5:124199269-124199317                          | NM_001005525:129   | Rsrc2      | INSIDE                 | 0.302                                           | 0.593                            | 1203.73             | 713.96              | 0.179                            | 876.61              | 156.88              |
| A_68_P22449707 | chr3:116211186-116211230                          | NM_025517:-115     | Rted1      | DIVERGENT_PROMOTER     | 0.326                                           | 0.545                            | 1821.44             | 993.37              | 0.178                            | 1535.89             | 273.01              |
| A_68_P24591630 | chr6:83085934-83085978                            | NM_009106:-1121    | Rtkn       | PROMOTER               | 0.127                                           | 0.606                            | 2364.55             | 1432.02             | 0.077                            | 1647.87             | 127.14              |
| A_68_P24591631 | chr6:83086000-83086044                            | NM_009106:-1055    | Rtkn       | PROMOTER               | 0.400                                           | 0.655                            | 1225.70             | 802.41              | 0.262                            | 828.16              | 216.99              |
| A_68_P24591678 | chr6:83092414-83092458                            | NM_009106:5359     | Rtkn       | INSIDE                 | 0.510                                           | 0.544                            | 1362.14             | 740.92              | 0.277                            | 1054.37             | 292.49              |
| A_68_P28531916 | chr12:73509185-73509229                           | NM_153457:720      | Rtn1       | INSIDE                 | 0.517                                           | 0.679                            | 1209.17             | 820.57              | 0.351                            | 909.19              | 319.29              |
| A_68_P24992460 | chr7:19868360-19868404                            | NM_001025364:-8065 | Rtn2       | PROMOTER               | 0.548                                           | 0.493                            | 1960.99             | 966.53              | 0.270                            | 1462.25             | 394.66              |
| A_68_P31940077 | chr19:7557297-7557341                             | NM_053076:453      | Rtn3       | INSIDE                 | 0.408                                           | 1.623                            | 3523.70             | 5720.20             | 0.662                            | 2531.91             | 1675.36             |
| A_68_P27675734 | chr11:29592809-29592856                           | NM_194052:-65      | Rtn4       | PROMOTER               | 0.103                                           | 1.871                            | 969.72              | 1814.44             | 0.194                            | 622.03              | 120.41              |
| A_68_P27675741 | chr11:29593764-29593808                           | NM_194051:13       | Rtn4       | INSIDE                 | 0.170                                           | 0.606                            | 3599.56             | 2180.48             | 0.103                            | 2723.51             | 280.55              |
| A_68_P30577646 | chr16:18127970-18128014                           | NM_022982:194      | Rtn4r      | INSIDE                 | 0.190                                           | 0.524                            | 1336.50             | 700.59              | 0.100                            | 1200.85             | 119.71              |
| A_68_P27924763 | chr11:75006899-75006943                           | NM_177708:-574     | Rtn4r1     | DIVERGENT_PROMOTER     | 0.458                                           | 0.689                            | 3535.73             | 2436.76             | 0.316                            | 2509.06             | 792.08              |
| A_68_P27924766 | chr11:75007358-75007402                           | NM_177708:-114     | Rtn4r1     | DIVERGENT_PROMOTER     | 0.557                                           | 0.556                            | 1115.18             | 619.93              | 0.310                            | 883.17              | 273.44              |

| ProbeName      | Target position of probe on CpG island microarray | TargetID           | GeneSymbol | CpG island Description | Ratio of relative methylation (TiO2-NP/Vehicle) | Sham group                       |                     |                     | TiO <sub>2</sub> -H group        |                     |                     |
|----------------|---------------------------------------------------|--------------------|------------|------------------------|-------------------------------------------------|----------------------------------|---------------------|---------------------|----------------------------------|---------------------|---------------------|
|                |                                                   |                    |            |                        |                                                 | Relative methylation (Cy-5/Cy-3) | Cy-3 signal (Input) | Cy-5 signal (MeDIP) | Relative methylation (Cy-5/Cy-3) | Cy-3 signal (Input) | Cy-5 signal (MeDIP) |
| A_68_P27924775 | chr11:75008355-75008401                           | NM_177708:884      | Rtn4r1     | INSIDE                 | 0.274                                           | 0.413                            | 1547.24             | 638.93              | 0.113                            | 1025.14             | 116.19              |
| A_68_P27924778 | chr11:75008653-75008697                           | NM_177708:1180     | Rtn4r1     | INSIDE                 | 0.449                                           | 0.669                            | 1853.26             | 1239.36             | 0.300                            | 1264.66             | 379.64              |
| A_68_P27924902 | chr11:75027241-75027285                           | NM_177708:19768    | Rtn4r1     | INSIDE                 | 0.368                                           | 0.546                            | 1933.57             | 1055.77             | 0.201                            | 1441.23             | 289.59              |
| A_68_P21395229 | chr2:84728472-84728517                            | NM_199223:-1645    | Rtn4r2     | PROMOTER               | 0.218                                           | 0.511                            | 1371.91             | 700.70              | 0.111                            | 1068.19             | 118.67              |
| A_68_P28079293 | chr11:102255152-102255196                         | NM_016759:426      | Rundc3a    | INSIDE                 | 0.246                                           | 0.585                            | 1027.28             | 600.56              | 0.144                            | 855.32              | 123.21              |
| A_68_P23468799 | chr5:8623093-8623137                              | NM_198620:-162     | Rundc3b    | PROMOTER               | 0.524                                           | 0.551                            | 1394.30             | 768.90              | 0.289                            | 1118.35             | 323.01              |
| A_68_P30970267 | chr16:92606200-92606244                           | NM_001111023:91351 | Runx1      | INSIDE                 | 0.516                                           | 1.408                            | 3130.00             | 4407.72             | 0.726                            | 2354.96             | 1709.68             |
| A_68_P30970947 | chr16:92697153-92697197                           | NM_001111023:399   | Runx1      | INSIDE                 | 0.406                                           | 0.515                            | 2685.30             | 1382.40             | 0.209                            | 2016.68             | 421.81              |
| A_68_P31196983 | chr17:44871711-44871755                           | NM_001145920:1865  | Runx2      | INSIDE                 | 0.639                                           | 0.512                            | 1047.42             | 536.45              | 0.327                            | 806.88              | 264.25              |
| A_68_P23327084 | chr4:134731141-134731185                          | NM_019732:54603    | Runx3      | INSIDE                 | 0.180                                           | 0.672                            | 1193.06             | 801.36              | 0.121                            | 988.42              | 119.79              |
| A_68_P22871359 | chr4:43395245-43395289                            | NM_001037709:413   | Rusc2      | INSIDE                 | 0.172                                           | 0.676                            | 1726.81             | 1166.66             | 0.116                            | 1393.29             | 162.11              |
| A_68_P26700014 | chr9:86465671-86465715                            | NM_001145968:33    | Rwdd2a     | INSIDE                 | 0.516                                           | 0.585                            | 4142.67             | 2424.58             | 0.302                            | 3140.75             | 949.10              |
| A_68_P25842224 | chr8:48619355-48619399                            | NM_203507:378      | Rwdd4a     | INSIDE                 | 0.184                                           | 0.430                            | 2782.07             | 1197.41             | 0.079                            | 2011.19             | 159.67              |
| A_68_P25842225 | chr8:48619443-48619487                            | NM_203507:466      | Rwdd4a     | INSIDE                 | 0.169                                           | 0.677                            | 1489.95             | 1009.30             | 0.114                            | 1051.65             | 120.14              |
| A_68_P30013954 | chr15:10965913-10965957                           | NM_178717:1789     | Rxfp3      | INSIDE                 | 0.188                                           | 0.711                            | 1397.06             | 992.87              | 0.133                            | 1076.55             | 143.56              |
| A_68_P30013955 | chr15:10966024-10966068                           | NM_178717:1677     | Rxfp3      | INSIDE                 | 0.300                                           | 0.692                            | 1201.59             | 831.41              | 0.208                            | 816.46              | 169.56              |
| A_68_P30013961 | chr15:10966774-10966818                           | NM_178717:927      | Rxfp3      | INSIDE                 | 0.157                                           | 0.697                            | 4372.73             | 3046.88             | 0.109                            | 3396.17             | 371.03              |
| A_68_P21085997 | chr2:27532005-27532049                            | NM_011305:-694     | Rxra       | PROMOTER               | 0.097                                           | 0.539                            | 3354.66             | 1807.88             | 0.052                            | 2324.06             | 121.18              |
| A_68_P21085998 | chr2:27532103-27532149                            | NM_011305:-594     | Rxra       | PROMOTER               | 0.307                                           | 0.619                            | 1738.58             | 1075.62             | 0.190                            | 1309.57             | 248.37              |
| A_68_P31151620 | chr17:34169430-34169477                           | NM_001205215:159   | Rxrb       | INSIDE                 | 0.211                                           | 0.635                            | 1134.78             | 720.41              | 0.134                            | 909.88              | 121.64              |
| A_68_P25025137 | chr7:29849427-29849471                            | NM_009109:60722    | Ryr1       | INSIDE                 | 0.585                                           | 3.562                            | 488.34              | 1739.48             | 2.085                            | 447.61              | 933.23              |
| A_68_P28830400 | chr13:12198333-12198377                           | NM_023868:858      | Ryr2       | INSIDE                 | 0.601                                           | 0.548                            | 1628.34             | 891.62              | 0.329                            | 1428.77             | 470.24              |
| A_68_P22336825 | chr3:93324681-93324725                            | NM_016740:285      | S100a11    | INSIDE                 | 0.492                                           | 0.475                            | 1116.92             | 529.99              | 0.234                            | 890.27              | 208.04              |
| A_68_P22336828 | chr3:93324960-93325004                            | NM_016740:565      | S100a11    | INSIDE                 | 0.603                                           | 0.580                            | 1343.79             | 779.27              | 0.350                            | 1075.51             | 375.97              |
| A_68_P26344889 | chr9:20780299-20780343                            | NM_010333:917      | S1pr2      | INSIDE                 | 0.258                                           | 0.333                            | 1678.98             | 558.95              | 0.086                            | 1407.01             | 121.05              |
| A_68_P26344892 | chr9:20780634-20780678                            | NM_010333:581      | S1pr2      | INSIDE                 | 0.150                                           | 0.721                            | 2810.39             | 2025.90             | 0.108                            | 2201.03             | 237.29              |
| A_68_P26344895 | chr9:20780976-20781020                            | NM_010333:239      | S1pr2      | INSIDE                 | 0.627                                           | 0.379                            | 1860.91             | 705.48              | 0.238                            | 1518.23             | 360.79              |
| A_68_P26344897 | chr9:20781232-20781276                            | NM_010333:-17      | S1pr2      | PROMOTER               | 0.434                                           | 1.480                            | 2047.13             | 3029.62             | 0.643                            | 1398.76             | 899.34              |
| A_68_P29032313 | chr13:51504178-51504222                           | NM_010101:214      | S1pr3      | INSIDE                 | 0.260                                           | 0.719                            | 3156.51             | 2268.83             | 0.187                            | 2171.75             | 406.64              |
| A_68_P26346140 | chr9:21048545-21048589                            | NM_053190:4321     | S1pr5      | INSIDE                 | 0.403                                           | 0.535                            | 1135.96             | 608.15              | 0.216                            | 1006.93             | 217.15              |
| A_68_P26346146 | chr9:21049162-21049206                            | NM_053190:3703     | S1pr5      | INSIDE                 | 0.414                                           | 0.484                            | 1981.32             | 959.66              | 0.200                            | 1636.69             | 327.93              |
| A_68_P25100828 | chr7:53965985-53966029                            | NM_030233:15       | Saal1      | INSIDE                 | 0.627                                           | 0.632                            | 1392.36             | 880.50              | 0.396                            | 1171.80             | 464.41              |
| A_68_P26895475 | chr9:123438639-123438695                          | NM_030692:-333     | Sacm11     | PROMOTER               | 0.251                                           | 0.413                            | 1389.88             | 574.54              | 0.104                            | 1135.50             | 117.92              |
| A_68_P26044784 | chr8:91566566-91566616                            | NM_021390:1471     | Sall1      | INSIDE                 | 0.469                                           | 0.628                            | 1205.93             | 756.78              | 0.294                            | 986.55              | 290.39              |
| A_68_P26044789 | chr8:91567168-91567212                            | NM_021390:871      | Sall1      | INSIDE                 | 0.205                                           | 0.554                            | 1453.85             | 805.70              | 0.114                            | 1052.79             | 119.57              |
| A_68_P26044795 | chr8:91567813-91567857                            | NM_021390:227      | Sall1      | INSIDE                 | 0.526                                           | 0.330                            | 1868.36             | 616.44              | 0.173                            | 1602.95             | 277.95              |
| A_68_P31868104 | chr18:81182542-81182586                           | NM_178280:753      | Sall3      | INSIDE                 | 0.650                                           | 0.534                            | 1422.10             | 759.78              | 0.348                            | 1067.28             | 370.91              |
| A_68_P31868115 | chr18:81184119-81184163                           | NM_178280:-823     | Sall3      | PROMOTER               | 0.627                                           | 0.600                            | 2579.41             | 1548.67             | 0.377                            | 2060.63             | 776.29              |
| A_68_P30224201 | chr15:53733924-53733974                           | NM_177225:43       | Samd12     | INSIDE                 | 0.244                                           | 0.505                            | 2498.86             | 1262.95             | 0.123                            | 1701.81             | 209.48              |
| A_68_P28036069 | chr11:94871187-94871231                           | NM_146025:16       | Samd14     | INSIDE                 | 0.429                                           | 0.511                            | 1098.60             | 560.89              | 0.219                            | 888.67              | 194.42              |
| A_68_P29578867 | chr14:47501948-47501992                           | NM_001037221:-669  | Samd4      | PROMOTER               | 0.281                                           | 0.414                            | 1606.07             | 665.62              | 0.117                            | 1240.06             | 144.55              |
| A_68_P29578888 | chr14:47504466-47504510                           | NM_001037221:1849  | Samd4      | INSIDE                 | 0.537                                           | 0.459                            | 2559.16             | 1174.53             | 0.246                            | 2128.73             | 524.34              |
| A_68_P25021896 | chr7:29221702-29221746                            | NM_175021:-514     | Samd4b     | DIVERGENT_PROMOTER     | 0.583                                           | 0.559                            | 1178.30             | 658.97              | 0.326                            | 988.86              | 322.20              |
| A_68_P29454672 | chr14:22570199-22570243                           | NM_026283:468      | Samd8      | INSIDE                 | 0.175                                           | 0.658                            | 1611.64             | 1059.89             | 0.115                            | 1149.32             | 132.07              |

| ProbeName      | Target position of probe on CpG island microarray | TargetID          | GeneSymbol | CpG island Description | Ratio of relative methylation (TiO2-NP/Vehicle) | Sham group                       |                     |                     | TiO <sub>2</sub> -H group        |                     |                     |
|----------------|---------------------------------------------------|-------------------|------------|------------------------|-------------------------------------------------|----------------------------------|---------------------|---------------------|----------------------------------|---------------------|---------------------|
|                |                                                   |                   |            |                        |                                                 | Relative methylation (Cy-5/Cy-3) | Cy-3 signal (Input) | Cy-5 signal (MeDIP) | Relative methylation (Cy-5/Cy-3) | Cy-3 signal (Input) | Cy-5 signal (MeDIP) |
| A_68_P21775423 | chr2:156960457-156960501                          | NM_001139520:480  | Samhd1     | INSIDE                 | 0.408                                           | 0.568                            | 1117.04             | 634.74              | 0.232                            | 1007.64             | 233.45              |
| A_68_P30393146 | chr15:84022703-84022747                           | NM_178614:62      | Samm50     | INSIDE                 | 0.421                                           | 0.447                            | 1409.97             | 629.72              | 0.188                            | 1155.30             | 217.45              |
| A_68_P30393147 | chr15:84022777-84022821                           | NM_178614:136     | Samm50     | INSIDE                 | 0.406                                           | 0.691                            | 3994.97             | 2761.52             | 0.280                            | 3060.42             | 858.38              |
| A_68_P31598893 | chr18:31794423-31794469                           | NM_172965:410     | Sap130     | INSIDE                 | 0.108                                           | 0.710                            | 2044.22             | 1450.72             | 0.076                            | 1568.02             | 119.73              |
| A_68_P27827566 | chr11:57614919-57614965                           | NM_001081168:-196 | Sap301     | PROMOTER               | 0.172                                           | 1.782                            | 1897.59             | 3381.73             | 0.306                            | 1183.28             | 361.79              |
| A_68_P27181743 | chr10:61143343-61143387                           | NM_009120:296     | Sar1a      | INSIDE                 | 0.566                                           | 0.631                            | 2216.17             | 1399.40             | 0.358                            | 1667.68             | 596.47              |
| A_68_P27943642 | chr11:78304280-78304324                           | NM_001168521:6954 | Sarm1      | INSIDE                 | 0.602                                           | 0.680                            | 1333.95             | 906.64              | 0.409                            | 1015.98             | 415.37              |
| A_68_P27943646 | chr11:78304705-78304749                           | NM_001168521:6530 | Sarm1      | INSIDE                 | 0.210                                           | 0.508                            | 1438.88             | 731.17              | 0.107                            | 1130.88             | 120.88              |
| A_68_P27543378 | chr10:128259182-128259239                         | NM_025364:384     | Sarnp      | INSIDE                 | 0.231                                           | 0.497                            | 1334.36             | 662.70              | 0.115                            | 1044.10             | 120.03              |
| A_68_P22412728 | chr3:108247875-108247920                          | NM_001204979:280  | Sars       | INSIDE                 | 0.191                                           | 0.559                            | 1433.83             | 800.91              | 0.107                            | 1107.48             | 118.39              |
| A_68_P22412729 | chr3:108247976-108248020                          | NM_001204979:179  | Sars       | INSIDE                 | 0.144                                           | 0.620                            | 1784.22             | 1106.24             | 0.089                            | 1331.89             | 119.05              |
| A_68_P22412732 | chr3:108248246-108248294                          | NM_001204979:-93  | Sars       | PROMOTER               | 0.093                                           | 0.667                            | 2721.42             | 1816.43             | 0.062                            | 1934.76             | 120.72              |
| A_68_P31928437 | chr19:5388969-5389013                             | NM_016882:-287    | Sart1      | PROMOTER               | 0.282                                           | 0.529                            | 1120.54             | 592.66              | 0.149                            | 886.23              | 131.98              |
| A_68_P26926728 | chr10:8606159-8606207                             | NM_175155:-314    | Sash1      | PROMOTER               | 0.219                                           | 0.538                            | 1448.43             | 778.96              | 0.118                            | 1026.36             | 121.00              |
| A_68_P22450159 | chr3:116297548-116297592                          | NM_028349:-355    | Sass6      | PROMOTER               | 0.430                                           | 0.525                            | 1549.58             | 813.48              | 0.226                            | 1281.98             | 289.46              |
| A_68_P22450166 | chr3:116298284-116298328                          | NM_028349:381     | Sass6      | INSIDE                 | 0.145                                           | 0.590                            | 1968.04             | 1161.25             | 0.085                            | 1393.24             | 119.11              |
| A_68_P32758876 | chrX:151651017-151651061                          | NM_009121:-86     | Sat1       | PROMOTER               | 0.284                                           | 1.456                            | 2986.18             | 4346.66             | 0.413                            | 1226.63             | 506.19              |
| A_68_P20250374 | chr1:57026684-57026728                            | NM_139146:1472    | Satb2      | INSIDE                 | 0.590                                           | 0.551                            | 962.45              | 530.59              | 0.325                            | 833.78              | 271.05              |
| A_68_P20250375 | chr1:57026759-57026807                            | NM_139146:1396    | Satb2      | INSIDE                 | 0.431                                           | 0.673                            | 1459.32             | 981.68              | 0.290                            | 1126.26             | 326.72              |
| A_68_P20250386 | chr1:57027876-57027920                            | NM_139146:280     | Satb2      | INSIDE                 | 0.367                                           | 0.721                            | 4515.25             | 3255.16             | 0.264                            | 2873.17             | 759.41              |
| A_68_P24092946 | chr5:130731035-130731079                          | NM_023248:276     | Sbds       | INSIDE                 | 0.172                                           | 0.644                            | 5110.85             | 3292.95             | 0.111                            | 3901.95             | 432.30              |
| A_68_P24092947 | chr5:130731194-130731238                          | NM_023248:116     | Sbds       | INSIDE                 | 0.175                                           | 0.649                            | 1450.87             | 941.34              | 0.113                            | 1059.46             | 119.97              |
| A_68_P30424508 | chr15:89145163-89145207                           | NM_001081030:558  | Sbfl       | INSIDE                 | 0.558                                           | 0.538                            | 1198.03             | 644.62              | 0.300                            | 1067.07             | 320.46              |
| A_68_P24061230 | chr5:124874812-124874856                          | NM_001081203:1089 | Sbno1      | INSIDE                 | 0.169                                           | 0.571                            | 3945.66             | 2252.86             | 0.096                            | 2651.15             | 255.52              |
| A_68_P24061239 | chr5:124875960-124876004                          | NM_001081203:-59  | Sbno1      | PROMOTER               | 0.423                                           | 0.464                            | 2926.54             | 1357.27             | 0.196                            | 2319.38             | 454.59              |
| A_68_P27280974 | chr10:79564978-79565022                           | NM_183426:447     | Sbno2      | INSIDE                 | 0.382                                           | 1.813                            | 2958.89             | 5365.60             | 0.692                            | 2160.66             | 1494.97             |
| A_68_P27280977 | chr10:79565295-79565339                           | NM_183426:131     | Sbno2      | INSIDE                 | 0.452                                           | 0.463                            | 3369.65             | 1558.55             | 0.209                            | 2384.72             | 498.98              |
| A_68_P27280979 | chr10:79565571-79565615                           | NM_183426:-145    | Sbno2      | PROMOTER               | 0.189                                           | 0.530                            | 1545.81             | 818.67              | 0.100                            | 1157.92             | 115.89              |
| A_68_P26454290 | chr9:42072563-42072607                            | NM_172769:-201    | Sc5d       | PROMOTER               | 0.557                                           | 0.466                            | 2173.31             | 1012.46             | 0.259                            | 1775.26             | 460.30              |
| A_68_P25090667 | chr7:52271089-52271133                            | NM_001008422:509  | Scaf1      | INSIDE                 | 0.525                                           | 0.597                            | 935.41              | 558.13              | 0.313                            | 703.40              | 220.26              |
| A_68_P25090672 | chr7:52271527-52271571                            | NM_001008422:71   | Scaf1      | INSIDE                 | 0.297                                           | 0.495                            | 1154.40             | 571.19              | 0.147                            | 814.15              | 119.77              |
| A_68_P25090673 | chr7:52271610-52271654                            | NM_001008422:-13  | Scaf1      | DIVERGENT_PROMOTER     | 0.234                                           | 0.503                            | 1312.83             | 660.29              | 0.118                            | 1005.47             | 118.24              |
| A_68_P30463768 | chr15:96290631-96290675                           | NM_028148:622     | Scaf11     | INSIDE                 | 0.212                                           | 0.646                            | 1225.33             | 792.11              | 0.137                            | 899.46              | 123.32              |
| A_68_P30463774 | chr15:96291694-96291742                           | NM_028148:-444    | Scaf11     | PROMOTER               | 0.294                                           | 0.501                            | 1219.43             | 610.39              | 0.147                            | 812.36              | 119.44              |
| A_68_P30463776 | chr15:96291913-96291959                           | NM_028148:-662    | Scaf11     | PROMOTER               | 0.230                                           | 0.690                            | 1041.08             | 718.10              | 0.158                            | 769.02              | 121.80              |
| A_68_P31003193 | chr17:3114560-3114614                             | NM_134123:-385    | Scaf8      | PROMOTER               | 0.269                                           | 0.397                            | 1860.62             | 738.51              | 0.107                            | 1441.08             | 154.09              |
| A_68_P31003198 | chr17:3115122-3115166                             | NM_134123:173     | Scaf8      | INSIDE                 | 0.263                                           | 0.617                            | 1848.61             | 1141.12             | 0.162                            | 1633.59             | 264.93              |
| A_68_P27284239 | chr10:80065786-80065830                           | NM_019575:182     | Scamp4     | INSIDE                 | 0.263                                           | 0.374                            | 1973.96             | 738.89              | 0.098                            | 1545.77             | 152.22              |
| A_68_P29676509 | chr14:66572807-66572857                           | NM_172604:-251    | Scara3     | PROMOTER               | 0.110                                           | 1.425                            | 1005.72             | 1433.29             | 0.156                            | 762.96              | 119.34              |
| A_68_P24066362 | chr5:125821382-125821426                          | NM_001205082:60   | Scarb1     | INSIDE                 | 0.117                                           | 0.693                            | 3135.41             | 2172.49             | 0.081                            | 2016.71             | 164.03              |
| A_68_P24066363 | chr5:125821560-125821604                          | NM_001205082:-118 | Scarb1     | PROMOTER               | 0.248                                           | 2.001                            | 3253.79             | 6510.19             | 0.497                            | 1989.18             | 988.87              |
| A_68_P30575777 | chr16:17802822-17802869                           | NM_153790:5471    | Scarf2     | INSIDE                 | 0.319                                           | 0.660                            | 996.82              | 658.39              | 0.211                            | 732.58              | 154.45              |
| A_68_P30575818 | chr16:17807580-17807624                           | NM_153790:10228   | Scarf2     | INSIDE                 | 0.437                                           | 0.702                            | 1450.27             | 1018.03             | 0.306                            | 1203.90             | 368.91              |
| A_68_P30575819 | chr16:17807668-17807712                           | NM_153790:10316   | Scarf2     | INSIDE                 | 0.328                                           | 0.515                            | 3124.31             | 1609.55             | 0.169                            | 2519.47             | 425.42              |

| ProbeName      | Target position of probe on CpG island microarray | TargetID           | GeneSymbol | CpG island Description | Ratio of relative methylation (TiO2-NP/Vehicle) | Sham group                       |                     |                     | TiO <sub>2</sub> -H group        |                     |                     |
|----------------|---------------------------------------------------|--------------------|------------|------------------------|-------------------------------------------------|----------------------------------|---------------------|---------------------|----------------------------------|---------------------|---------------------|
|                |                                                   |                    |            |                        |                                                 | Relative methylation (Cy-5/Cy-3) | Cy-3 signal (Input) | Cy-5 signal (MeDIP) | Relative methylation (Cy-5/Cy-3) | Cy-3 signal (Input) | Cy-5 signal (MeDIP) |
| A_68_P24819294 | chr6:125141350-125141400                          | NR_028517:-4925    | Scarna10   | PROMOTER               | 0.408                                           | 0.615                            | 1712.69             | 1053.88             | 0.251                            | 1327.18             | 332.98              |
| A_68_P24819295 | chr6:125141439-125141483                          | NR_028517:-5011    | Scarna10   | PROMOTER               | 0.392                                           | 0.538                            | 2141.51             | 1152.69             | 0.211                            | 1553.71             | 328.17              |
| A_68_P22413314 | chr3:108357099-108357143                          | NR_028538:200      | Scarna2    | DOWNSTREAM             | 0.226                                           | 0.642                            | 1098.59             | 705.00              | 0.145                            | 833.93              | 120.84              |
| A_68_P32131187 | chr19:44322861-44322905                           | NM_024450:45105    | Scd3       | DOWNSTREAM             | 0.579                                           | 0.483                            | 1336.55             | 645.79              | 0.280                            | 1158.84             | 324.23              |
| A_68_P28429502 | chr12:52478398-52478449                           | NM_029825:-143     | Scfd1      | PROMOTER               | 0.232                                           | 0.411                            | 1649.56             | 678.52              | 0.095                            | 1260.64             | 120.27              |
| A_68_P28429504 | chr12:52478611-52478655                           | NM_029825:66       | Scfd1      | INSIDE                 | 0.254                                           | 0.602                            | 1313.85             | 791.57              | 0.153                            | 910.79              | 139.23              |
| A_68_P26645323 | chr9:75531947-75531992                            | NM_001164790:-106  | Seg3       | PROMOTER               | 0.258                                           | 0.342                            | 1926.36             | 658.56              | 0.088                            | 1402.14             | 123.81              |
| A_68_P22215786 | chr3:68297563-68297607                            | NR_036665:-530     | Schip1     | PROMOTER               | 0.450                                           | 0.428                            | 3152.94             | 1348.73             | 0.193                            | 2472.58             | 476.28              |
| A_68_P22215791 | chr3:68298276-68298322                            | NR_036665:184      | Schip1     | INSIDE                 | 0.236                                           | 0.512                            | 1328.75             | 680.03              | 0.121                            | 1000.96             | 121.08              |
| A_68_P22215796 | chr3:68298884-68298928                            | NR_036665:792      | Schip1     | INSIDE                 | 0.160                                           | 0.506                            | 5750.71             | 2909.70             | 0.081                            | 4159.49             | 336.40              |
| A_68_P22215801 | chr3:68299336-68299380                            | NR_036665:1244     | Schip1     | INSIDE                 | 0.131                                           | 0.728                            | 1665.00             | 1211.78             | 0.095                            | 1256.49             | 119.50              |
| A_68_P23251106 | chr4:120078426-120078470                          | NM_001159630:563   | Scmh1      | INSIDE                 | 0.379                                           | 0.600                            | 1674.00             | 1004.47             | 0.227                            | 1603.57             | 364.74              |
| A_68_P26442128 | chr9:40076808-40076852                            | NM_001083917:30    | Scn3b      | INSIDE                 | 0.162                                           | 0.495                            | 2012.11             | 996.61              | 0.080                            | 1520.69             | 121.77              |
| A_68_P26873361 | chr9:119488531-119488575                          | NM_021544:-418     | Scn5a      | PROMOTER               | 0.227                                           | 0.637                            | 1505.63             | 959.34              | 0.145                            | 1164.02             | 168.23              |
| A_68_P30489277 | chr15:100877902-100877949                         | NM_011323:111224   | Scn8a      | DOWNSTREAM             | 0.492                                           | 0.572                            | 1566.30             | 896.17              | 0.281                            | 1222.01             | 343.79              |
| A_68_P30489324 | chr15:100883675-100883719                         | NM_011323:116995   | Scn8a      | DOWNSTREAM             | 0.561                                           | 0.627                            | 1675.76             | 1050.43             | 0.352                            | 1580.13             | 556.04              |
| A_68_P25475987 | chr7:129008610-129008655                          | NM_011325:8        | Senn1b     | INSIDE                 | 0.296                                           | 0.444                            | 2237.84             | 992.61              | 0.131                            | 1674.89             | 219.88              |
| A_68_P25475988 | chr7:129008709-129008753                          | NM_011325:106      | Senn1b     | INSIDE                 | 0.646                                           | 0.428                            | 1252.92             | 536.83              | 0.277                            | 933.48              | 258.50              |
| A_68_P30424832 | chr15:89204085-89204129                           | NM_001111288:143   | Sco2       | INSIDE                 | 0.191                                           | 0.587                            | 1327.50             | 779.70              | 0.112                            | 1073.59             | 120.28              |
| A_68_P24464120 | chr6:54516036-54516080                            | NM_027268:318      | Sern1      | INSIDE                 | 0.261                                           | 0.611                            | 2879.70             | 1758.99             | 0.159                            | 2081.78             | 331.40              |
| A_68_P24464121 | chr6:54516133-54516177                            | NM_027268:222      | Sern1      | INSIDE                 | 0.187                                           | 0.562                            | 1461.21             | 820.71              | 0.105                            | 1132.37             | 119.20              |
| A_68_P30348858 | chr15:76348557-76348601                           | NM_130893:3981     | Sert1      | INSIDE                 | 0.346                                           | 0.480                            | 1591.67             | 763.81              | 0.166                            | 1138.79             | 189.10              |
| A_68_P30348859 | chr15:76348629-76348673                           | NM_130893:3909     | Sert1      | INSIDE                 | 0.339                                           | 0.476                            | 1845.93             | 877.89              | 0.161                            | 1351.96             | 218.04              |
| A_68_P30348874 | chr15:76350196-76350240                           | NM_130893:2341     | Sert1      | INSIDE                 | 0.088                                           | 1.855                            | 10808.14            | 20049.85            | 0.163                            | 6370.92             | 1038.67             |
| A_68_P30348901 | chr15:76353383-76353427                           | NM_130893:-845     | Sert1      | PROMOTER               | 0.246                                           | 0.440                            | 1857.06             | 816.83              | 0.108                            | 1307.90             | 141.70              |
| A_68_P21747623 | chr2:151921158-151921202                          | NM_001160410:13916 | Sert2      | INSIDE                 | 0.264                                           | 1.355                            | 2032.50             | 2753.88             | 0.358                            | 1383.66             | 495.61              |
| A_68_P31120663 | chr17:28278567-28278611                           | NM_001004366:-882  | Scube3     | PROMOTER               | 0.412                                           | 0.452                            | 1146.06             | 518.47              | 0.187                            | 957.24              | 178.55              |
| A_68_P31120667 | chr17:28279215-28279259                           | NM_001004366:-234  | Scube3     | PROMOTER               | 0.623                                           | 0.574                            | 2709.46             | 1553.88             | 0.357                            | 2254.63             | 804.92              |
| A_68_P30348454 | chr15:76288272-76288316                           | NM_198885:427      | Sex        | INSIDE                 | 0.606                                           | 0.519                            | 1891.00             | 981.97              | 0.315                            | 1523.61             | 479.34              |
| A_68_P31930772 | chr19:5770953-5770997                             | NM_023912:427      | Scyl1      | INSIDE                 | 0.520                                           | 0.655                            | 1920.96             | 1257.37             | 0.340                            | 1369.97             | 466.12              |
| A_68_P27332529 | chr10:89148969-89149013                           | NM_198021:40       | Scyl2      | INSIDE                 | 0.531                                           | 0.697                            | 1423.12             | 991.24              | 0.370                            | 1195.74             | 441.94              |
| A_68_P23893504 | chr5:92738668-92738712                            | NM_172713:360      | Sdad1      | INSIDE                 | 0.293                                           | 0.723                            | 2304.22             | 1666.04             | 0.212                            | 1683.50             | 357.23              |
| A_68_P28224313 | chr12:8777876-8777920                             | NM_011519:-303     | Sdc1       | PROMOTER               | 0.286                                           | 0.478                            | 1159.22             | 553.62              | 0.137                            | 887.67              | 121.34              |
| A_68_P28224314 | chr12:8777965-8778009                             | NM_011519:-215     | Sdc1       | PROMOTER               | 0.229                                           | 0.578                            | 2685.91             | 1552.20             | 0.132                            | 2166.00             | 286.47              |
| A_68_P28224317 | chr12:8778225-8778269                             | NM_011519:45       | Sdc1       | INSIDE                 | 0.561                                           | 0.563                            | 2360.37             | 1329.96             | 0.316                            | 1718.40             | 543.22              |
| A_68_P28224330 | chr12:8779493-8779537                             | NM_011519:1313     | Sdc1       | INSIDE                 | 0.189                                           | 0.480                            | 1837.77             | 882.41              | 0.091                            | 1368.81             | 123.90              |
| A_68_P28224331 | chr12:8779590-8779634                             | NM_011519:1411     | Sdc1       | INSIDE                 | 0.377                                           | 0.650                            | 3084.75             | 2005.47             | 0.245                            | 2341.09             | 573.27              |
| A_68_P21817911 | chr2:164268487-164268531                          | NM_011521:180      | Sdc4       | INSIDE                 | 0.304                                           | 0.522                            | 1281.44             | 668.61              | 0.159                            | 1064.40             | 169.09              |
| A_68_P27942191 | chr11:78059485-78059537                           | NM_009143:263      | Sdf2       | INSIDE                 | 0.249                                           | 0.519                            | 1254.55             | 650.62              | 0.129                            | 936.65              | 120.74              |
| A_68_P27942192 | chr11:78059616-78059660                           | NM_009143:391      | Sdf2       | INSIDE                 | 0.532                                           | 0.569                            | 1964.93             | 1117.66             | 0.303                            | 1486.96             | 450.02              |
| A_68_P30572149 | chr16:17132425-17132469                           | NM_022324:30       | Sdf2l1     | INSIDE                 | 0.638                                           | 0.561                            | 2784.40             | 1561.61             | 0.358                            | 2256.50             | 807.17              |
| A_68_P30572152 | chr16:17132713-17132758                           | NM_022324:-259     | Sdf2l1     | PROMOTER               | 0.343                                           | 0.652                            | 972.55              | 634.34              | 0.223                            | 716.56              | 160.11              |
| A_68_P23441760 | chr4:155367175-155367219                          | NM_011341:174      | Sdf4       | INSIDE                 | 0.300                                           | 0.443                            | 3597.37             | 1592.29             | 0.133                            | 2849.65             | 378.39              |
| A_68_P23441761 | chr4:155367293-155367337                          | NM_011341:292      | Sdf4       | INSIDE                 | 0.307                                           | 0.477                            | 1271.30             | 606.18              | 0.146                            | 983.95              | 143.92              |

| ProbeName      | Target position of probe on CpG island microarray | TargetID           | GeneSymbol | CpG island Description | Ratio of relative methylation (TiO2-NP/Vehicle) | Sham group                       |                     |                     | TiO <sub>2</sub> -H group        |                     |                     |
|----------------|---------------------------------------------------|--------------------|------------|------------------------|-------------------------------------------------|----------------------------------|---------------------|---------------------|----------------------------------|---------------------|---------------------|
|                |                                                   |                    |            |                        |                                                 | Relative methylation (Cy-5/Cy-3) | Cy-3 signal (Input) | Cy-5 signal (MeDIP) | Relative methylation (Cy-5/Cy-3) | Cy-3 signal (Input) | Cy-5 signal (MeDIP) |
| A_68_P29145778 | chr13:74487536-74487580                           | NM_023281:130      | Sdha       | INSIDE                 | 0.416                                           | 0.479                            | 1256.33             | 601.51              | 0.199                            | 969.17              | 193.08              |
| A_68_P28145824 | chr11:113926254-113926298                         | NM_172800:989      | Sdk2       | INSIDE                 | 0.415                                           | 0.423                            | 2654.77             | 1123.94             | 0.176                            | 1979.25             | 347.60              |
| A_68_P28145837 | chr11:113927724-113927772                         | NM_172800:-483     | Sdk2       | PROMOTER               | 0.213                                           | 0.457                            | 1717.83             | 785.36              | 0.097                            | 1261.79             | 122.97              |
| A_68_P29620551 | chr14:56518869-56518914                           | NM_001082975:178   | Sdr39u1    | INSIDE                 | 0.176                                           | 0.632                            | 1687.88             | 1066.23             | 0.111                            | 1049.63             | 116.66              |
| A_68_P29620552 | chr14:56519022-56519066                           | NM_001082975:25    | Sdr39u1    | INSIDE                 | 0.315                                           | 0.709                            | 3748.22             | 2658.11             | 0.223                            | 2769.29             | 618.42              |
| A_68_P29620554 | chr14:56519301-56519352                           | NM_001082975:-257  | Sdr39u1    | PROMOTER               | 0.238                                           | 0.523                            | 1255.69             | 657.31              | 0.124                            | 952.39              | 118.51              |
| A_68_P25269485 | chr7:88092809-88092853                            | NM_019951:-394     | Sec11a     | PROMOTER               | 0.307                                           | 0.634                            | 826.34              | 523.49              | 0.194                            | 636.34              | 123.60              |
| A_68_P28163122 | chr11:116976258-116976302                         | NR_029459:-205     | Sec14l1    | PROMOTER               | 0.220                                           | 0.621                            | 2834.40             | 1759.68             | 0.136                            | 2013.85             | 274.88              |
| A_68_P21078762 | chr2:26300450-26300494                            | NM_153125:264      | Sec16a     | INSIDE                 | 0.312                                           | 0.477                            | 1159.54             | 553.10              | 0.149                            | 797.89              | 118.81              |
| A_68_P21078765 | chr2:26300767-26300811                            | NM_153125:-52      | Sec16a     | PROMOTER               | 0.352                                           | 0.704                            | 3435.76             | 2419.82             | 0.248                            | 2631.82             | 652.80              |
| A_68_P21707834 | chr2:144381520-144381564                          | NM_019787:-470     | Sec23b     | DIVERGENT_PROMOTER     | 0.491                                           | 0.524                            | 1561.14             | 817.77              | 0.257                            | 1207.69             | 310.56              |
| A_68_P29448256 | chr14:21493458-21493502                           | NM_001168273:-62   | Sec24c     | DIVERGENT_PROMOTER     | 0.631                                           | 0.497                            | 1200.16             | 596.51              | 0.313                            | 1039.54             | 325.78              |
| A_68_P29448257 | chr14:21493552-21493596                           | NM_001168273:32    | Sec24c     | INSIDE                 | 0.592                                           | 0.524                            | 1383.50             | 725.40              | 0.310                            | 1162.57             | 360.68              |
| A_68_P29448259 | chr14:21493732-21493776                           | NM_001168273:212   | Sec24c     | INSIDE                 | 0.313                                           | 0.592                            | 2499.08             | 1480.28             | 0.186                            | 1952.88             | 362.43              |
| A_68_P20976256 | chr2:5816062-5816106                              | NM_021305:315      | Sec61a2    | INSIDE                 | 0.226                                           | 0.459                            | 1341.45             | 615.26              | 0.104                            | 1155.91             | 120.02              |
| A_68_P22030177 | chr3:30692267-30692311                            | NM_027016:491      | Sec62      | INSIDE                 | 0.472                                           | 0.442                            | 1312.52             | 580.65              | 0.209                            | 1143.66             | 239.01              |
| A_68_P22030179 | chr3:30692442-30692486                            | NM_027016:667      | Sec62      | INSIDE                 | 0.493                                           | 0.596                            | 2371.11             | 1413.16             | 0.294                            | 1916.45             | 563.10              |
| A_68_P27096527 | chr10:42481255-42481299                           | NM_153055:-25      | Sec63      | PROMOTER               | 0.571                                           | 0.585                            | 1212.18             | 709.24              | 0.334                            | 1047.00             | 349.96              |
| A_68_P27096531 | chr10:42481959-42482003                           | NM_153055:679      | Sec63      | INSIDE                 | 0.168                                           | 2.489                            | 2830.36             | 7045.36             | 0.418                            | 1743.99             | 728.62              |
| A_68_P27096532 | chr10:42482055-42482099                           | NM_153055:775      | Sec63      | INSIDE                 | 0.114                                           | 1.824                            | 10066.38            | 18363.01            | 0.207                            | 6271.40             | 1298.66             |
| A_68_P29033515 | chr13:51747268-51747312                           | NM_029279:208      | Secisbp2   | INSIDE                 | 0.208                                           | 0.435                            | 1823.23             | 793.52              | 0.091                            | 1354.61             | 122.85              |
| A_68_P23699207 | chr5:53604122-53604166                            | NM_172710:547      | Sel1l3     | INSIDE                 | 0.399                                           | 0.533                            | 1774.42             | 945.20              | 0.212                            | 1363.90             | 289.58              |
| A_68_P29502937 | chr14:30781713-30781757                           | NM_019979:169      | Selk       | INSIDE                 | 0.563                                           | 0.654                            | 2837.27             | 1854.71             | 0.368                            | 2160.24             | 794.56              |
| A_68_P29502939 | chr14:30781960-30782004                           | NM_019979:417      | Selk       | INSIDE                 | 0.387                                           | 0.457                            | 1368.15             | 625.57              | 0.177                            | 965.93              | 170.93              |
| A_68_P26809843 | chr9:107501498-107501542                          | NM_009153:6213     | Sema3b     | INSIDE                 | 0.549                                           | 3.968                            | 607.40              | 2409.97             | 2.178                            | 440.27              | 958.74              |
| A_68_P26809957 | chr9:107514932-107514976                          | NM_001042779:-3382 | Sema3b     | PROMOTER               | 0.317                                           | 0.678                            | 2737.19             | 1855.43             | 0.215                            | 2093.27             | 449.55              |
| A_68_P26809960 | chr9:107515313-107515362                          | NM_001042779:-3765 | Sema3b     | PROMOTER               | 0.228                                           | 0.430                            | 1862.68             | 801.38              | 0.098                            | 1275.80             | 125.33              |
| A_68_P23482832 | chr5:12383399-12383443                            | NM_028882:255      | Sema3d     | INSIDE                 | 0.451                                           | 0.596                            | 900.43              | 536.53              | 0.269                            | 755.21              | 202.92              |
| A_68_P25265199 | chr7:87331654-87331698                            | NM_013659:-50      | Sema4b     | PROMOTER               | 0.343                                           | 0.535                            | 1137.27             | 608.78              | 0.184                            | 971.67              | 178.54              |
| A_68_P25265202 | chr7:87331967-87332011                            | NM_013659:262      | Sema4b     | INSIDE                 | 0.262                                           | 0.668                            | 1106.61             | 739.41              | 0.175                            | 963.33              | 168.38              |
| A_68_P25265270 | chr7:87343737-87343781                            | NM_013659:12032    | Sema4b     | INSIDE                 | 0.253                                           | 0.604                            | 1204.20             | 726.96              | 0.153                            | 871.69              | 133.15              |
| A_68_P20149045 | chr1:36613770-36613814                            | NM_001126047:1434  | Sema4c     | INSIDE                 | 0.252                                           | 0.701                            | 1920.32             | 1346.18             | 0.176                            | 1297.88             | 228.83              |
| A_68_P20149046 | chr1:36613936-36613984                            | NM_001126047:1266  | Sema4c     | INSIDE                 | 0.307                                           | 0.465                            | 1165.59             | 542.06              | 0.143                            | 881.56              | 125.81              |
| A_68_P20149048 | chr1:36614178-36614222                            | NM_001126047:1026  | Sema4c     | INSIDE                 | 0.266                                           | 0.466                            | 1230.25             | 573.10              | 0.124                            | 939.14              | 116.27              |
| A_68_P20149057 | chr1:36615326-36615370                            | NM_001126047:-122  | Sema4c     | PROMOTER               | 0.222                                           | 0.600                            | 1039.55             | 624.11              | 0.133                            | 895.19              | 119.36              |
| A_68_P20149051 | chr1:36614518-36614562                            | NM_001126047:686   | Sema4c     | INSIDE                 | 0.669                                           | 0.645                            | 1130.29             | 728.96              | 0.431                            | 949.38              | 409.44              |
| A_68_P29034450 | chr13:51888603-51888647                           | NM_013660:389      | Sema4d     | INSIDE                 | 0.175                                           | 0.539                            | 1663.93             | 896.28              | 0.094                            | 1284.85             | 121.24              |
| A_68_P29034451 | chr13:51888679-51888723                           | NM_013660:313      | Sema4d     | INSIDE                 | 0.284                                           | 0.409                            | 1636.17             | 668.85              | 0.116                            | 1261.66             | 146.71              |
| A_68_P32135692 | chr19:45063608-45063652                           | NM_011976:-203     | Sema4g     | PROMOTER               | 0.384                                           | 0.700                            | 3727.06             | 2609.07             | 0.269                            | 2764.75             | 742.89              |
| A_68_P30118688 | chr15:32175071-32175115                           | NM_009154:525      | Sema5a     | INSIDE                 | 0.438                                           | 0.645                            | 1312.52             | 846.02              | 0.283                            | 1106.30             | 312.62              |
| A_68_P30118694 | chr15:32175744-32175788                           | NM_009154:1199     | Sema5a     | INSIDE                 | 0.265                                           | 0.377                            | 1639.40             | 618.15              | 0.100                            | 1315.41             | 131.64              |
| A_68_P30670707 | chr16:35542109-35542153                           | NM_013661:683      | Sema5b     | INSIDE                 | 0.206                                           | 0.690                            | 5977.77             | 4122.35             | 0.142                            | 4231.33             | 601.94              |
| A_68_P30670708 | chr16:35542234-35542279                           | NM_013661:809      | Sema5b     | INSIDE                 | 0.303                                           | 0.691                            | 2015.11             | 1392.01             | 0.209                            | 1485.20             | 310.35              |
| A_68_P30670710 | chr16:35542481-35542525                           | NM_013661:1055     | Sema5b     | INSIDE                 | 0.333                                           | 0.693                            | 1104.16             | 765.26              | 0.231                            | 916.15              | 211.69              |

| ProbeName      | Target position of probe on CpG island microarray | TargetID           | GeneSymbol | CpG island Description | Ratio of relative methylation (TiO2-NP/Vehicle) | Sham group                       |                     |                     | TiO <sub>2</sub> -H group        |                     |                     |
|----------------|---------------------------------------------------|--------------------|------------|------------------------|-------------------------------------------------|----------------------------------|---------------------|---------------------|----------------------------------|---------------------|---------------------|
|                |                                                   |                    |            |                        |                                                 | Relative methylation (Cy-5/Cy-3) | Cy-3 signal (Input) | Cy-5 signal (MeDIP) | Relative methylation (Cy-5/Cy-3) | Cy-3 signal (Input) | Cy-5 signal (MeDIP) |
| A_68_P30670711 | chr16:35542576-35542620                           | NM_013661:1151     | Sema5b     | INSIDE                 | 0.091                                           | 0.449                            | 3881.02             | 1744.02             | 0.041                            | 3032.25             | 123.37              |
| A_68_P31682227 | chr18:47526193-47526237                           | NM_018744:2308     | Sema6a     | INSIDE                 | 0.283                                           | 0.385                            | 1381.04             | 532.08              | 0.109                            | 1066.25             | 116.36              |
| A_68_P31682228 | chr18:47526263-47526314                           | NM_018744:2234     | Sema6a     | INSIDE                 | 0.221                                           | 0.401                            | 1677.78             | 672.30              | 0.089                            | 1322.60             | 117.19              |
| A_68_P31682231 | chr18:47526609-47526653                           | NM_018744:1892     | Sema6a     | INSIDE                 | 0.345                                           | 0.668                            | 2256.66             | 1506.77             | 0.230                            | 1764.30             | 406.24              |
| A_68_P31254139 | chr17:56278984-56279028                           | NM_013662:-5731    | Sema6b     | PROMOTER               | 0.378                                           | 0.495                            | 2403.85             | 1190.58             | 0.187                            | 1795.25             | 336.05              |
| A_68_P31254157 | chr17:56281353-56281397                           | NM_001130456:-1608 | Sema6b     | PROMOTER               | 0.414                                           | 0.648                            | 3569.53             | 2312.29             | 0.268                            | 2533.73             | 678.80              |
| A_68_P31254158 | chr17:56281426-56281470                           | NM_001130456:-1682 | Sema6b     | PROMOTER               | 0.404                                           | 0.581                            | 2799.57             | 1627.69             | 0.235                            | 2130.76             | 500.62              |
| A_68_P31254208 | chr17:56288089-56288133                           | NM_001130456:-8344 | Sema6b     | PROMOTER               | 0.524                                           | 2.602                            | 6117.85             | 15916.37            | 1.362                            | 4071.00             | 5545.04             |
| A_68_P22342532 | chr3:94964402-94964446                            | NM_011351:-3871    | Sema6c     | PROMOTER               | 0.195                                           | 0.548                            | 1503.41             | 823.23              | 0.107                            | 1130.11             | 120.72              |
| A_68_P22342533 | chr3:94964490-94964535                            | NM_011351:-3783    | Sema6c     | PROMOTER               | 0.227                                           | 0.645                            | 1517.74             | 979.46              | 0.146                            | 1204.60             | 176.39              |
| A_68_P22342542 | chr3:94965500-94965544                            | NM_011351:-2773    | Sema6c     | PROMOTER               | 0.535                                           | 0.571                            | 1346.41             | 768.17              | 0.305                            | 1051.43             | 320.68              |
| A_68_P21597425 | chr2:124435761-124435806                          | NM_172537:-248     | Sema6d     | PROMOTER               | 0.406                                           | 0.615                            | 871.15              | 535.88              | 0.249                            | 650.35              | 162.24              |
| A_68_P30473047 | chr15:97923923-97923967                           | NM_144851:-108     | Senp1      | PROMOTER               | 0.665                                           | 0.647                            | 1402.42             | 907.98              | 0.430                            | 1117.88             | 481.06              |
| A_68_P30595530 | chr16:22009516-22009560                           | NM_029457:-18      | Senp2      | PROMOTER               | 0.156                                           | 0.564                            | 1753.46             | 989.64              | 0.088                            | 1411.18             | 124.37              |
| A_68_P27896512 | chr11:69494853-69494903                           | NM_030702:594      | Senp3      | INSIDE                 | 0.517                                           | 0.570                            | 1478.72             | 843.10              | 0.295                            | 1087.25             | 320.45              |
| A_68_P27896515 | chr11:69495196-69495240                           | NM_030702:254      | Senp3      | INSIDE                 | 0.289                                           | 0.519                            | 2388.39             | 1238.44             | 0.150                            | 1846.44             | 276.67              |
| A_68_P26667556 | chr9:79915402-79915446                            | NM_146003:715      | Senp6      | INSIDE                 | 0.524                                           | 0.580                            | 1184.12             | 686.23              | 0.303                            | 1003.97             | 304.68              |
| A_68_P23696202 | chr5:53060801-53060845                            | NM_172490:118      | Sepsecs    | INSIDE                 | 0.577                                           | 0.299                            | 1850.27             | 553.64              | 0.173                            | 1378.19             | 237.74              |
| A_68_P27167591 | chr10:58684147-58684191                           | NM_001024910:427   | Sept10     | INSIDE                 | 0.213                                           | 0.481                            | 1967.67             | 946.89              | 0.102                            | 1442.77             | 147.74              |
| A_68_P26365988 | chr9:25059616-25059661                            | NM_001205367:-401  | Sept7      | PROMOTER               | 0.348                                           | 0.689                            | 1101.77             | 759.06              | 0.240                            | 955.50              | 229.17              |
| A_68_P26365996 | chr9:25060486-25060530                            | NM_001205367:469   | Sept7      | INSIDE                 | 0.661                                           | 0.556                            | 1312.34             | 729.21              | 0.367                            | 1069.71             | 392.71              |
| A_68_P28164067 | chr11:117127295-117127344                         | NM_001113487:-240  | Sept9      | PROMOTER               | 0.281                                           | 0.545                            | 1091.92             | 594.59              | 0.153                            | 785.44              | 120.04              |
| A_68_P28164072 | chr11:117127975-117128019                         | NM_001113487:437   | Sept9      | INSIDE                 | 0.281                                           | 0.414                            | 1960.82             | 810.94              | 0.116                            | 1462.50             | 170.22              |
| A_68_P28164253 | chr11:117151685-117151737                         | NM_001113487:24151 | Sept9      | INSIDE                 | 0.447                                           | 4.153                            | 316.04              | 1312.54             | 1.858                            | 334.15              | 620.91              |
| A_68_P28164528 | chr11:117193656-117193700                         | NM_001113488:52    | Sept9      | INSIDE                 | 0.547                                           | 0.472                            | 1732.47             | 818.41              | 0.258                            | 1274.35             | 329.23              |
| A_68_P21580974 | chr2:121275109-121275153                          | NM_011354:167      | Serf2      | INSIDE                 | 0.504                                           | 0.508                            | 1930.91             | 981.26              | 0.256                            | 1715.70             | 439.52              |
| A_68_P27160893 | chr10:57252088-57252132                           | NM_019760:225      | Serinc1    | INSIDE                 | 0.584                                           | 0.598                            | 2679.26             | 1601.93             | 0.349                            | 2042.17             | 713.07              |
| A_68_P27160897 | chr10:57252403-57252448                           | NM_019760:-90      | Serinc1    | PROMOTER               | 0.349                                           | 0.466                            | 1189.08             | 554.31              | 0.163                            | 942.99              | 153.44              |
| A_68_P32926581 | chr13:93381448-93381492                           | NM_172588:378      | Serinc5    | INSIDE                 | 0.273                                           | 0.505                            | 1092.29             | 552.12              | 0.138                            | 893.39              | 123.25              |
| A_68_P20378194 | chr1:79855540-79855584                            | NM_009255:-322     | Serpine2   | PROMOTER               | 0.250                                           | 0.599                            | 1703.55             | 1020.23             | 0.150                            | 1455.57             | 218.36              |
| A_68_P25017512 | chr7:28271931-28271975                            | NM_018820:-19      | Sertad1    | PROMOTER               | 0.279                                           | 0.622                            | 2163.16             | 1344.97             | 0.173                            | 1769.61             | 306.95              |
| A_68_P27631990 | chr11:20443463-20443507                           | NM_021372:229      | Sertad2    | INSIDE                 | 0.613                                           | 0.689                            | 1889.90             | 1302.35             | 0.422                            | 1447.47             | 611.00              |
| A_68_P27632486 | chr11:20531998-20532042                           | NM_001038625:41    | Sertad2    | INSIDE                 | 0.284                                           | 0.465                            | 1105.30             | 514.01              | 0.132                            | 894.76              | 118.22              |
| A_68_P25017446 | chr7:28258643-28258687                            | NM_133210:-194     | Sertad3    | PROMOTER               | 0.665                                           | 0.425                            | 1727.41             | 734.53              | 0.283                            | 1521.32             | 430.17              |
| A_68_P20945779 | chr1:194661281-194661325                          | NM_001177794:16639 | Sertad4    | DOWNSTREAM             | 0.470                                           | 0.428                            | 1399.41             | 598.48              | 0.201                            | 1143.28             | 229.72              |
| A_68_P27091227 | chr10:41530014-41530058                           | NM_001162908:-343  | Sesn1      | DIVERGENT_PROMOTER     | 0.517                                           | 0.586                            | 1123.65             | 658.05              | 0.303                            | 858.74              | 260.18              |
| A_68_P27091228 | chr10:41530095-41530139                           | NM_001162908:-263  | Sesn1      | DIVERGENT_PROMOTER     | 0.232                                           | 0.568                            | 2939.31             | 1670.16             | 0.132                            | 2179.70             | 287.93              |
| A_68_P23312646 | chr4:132065845-132065889                          | NM_144907:505      | Sesn2      | INSIDE                 | 0.259                                           | 0.589                            | 985.42              | 580.54              | 0.153                            | 759.13              | 116.03              |
| A_68_P23312649 | chr4:132066191-132066235                          | NM_144907:159      | Sesn2      | INSIDE                 | 0.278                                           | 0.617                            | 870.56              | 537.41              | 0.171                            | 695.75              | 119.24              |
| A_68_P23312650 | chr4:132066273-132066317                          | NM_144907:77       | Sesn2      | INSIDE                 | 0.657                                           | 0.640                            | 1179.23             | 754.89              | 0.420                            | 958.86              | 403.05              |
| A_68_P26316370 | chr9:14080581-14080626                            | NM_030261:-141     | Sesn3      | PROMOTER               | 0.114                                           | 0.604                            | 2863.27             | 1729.16             | 0.069                            | 1960.62             | 135.26              |
| A_68_P26316371 | chr9:14080770-14080814                            | NM_030261:48       | Sesn3      | INSIDE                 | 0.478                                           | 0.559                            | 1900.92             | 1061.75             | 0.267                            | 1585.58             | 423.54              |
| A_68_P26316376 | chr9:14081279-14081323                            | NM_030261:556      | Sesn3      | INSIDE                 | 0.398                                           | 0.552                            | 1345.98             | 743.47              | 0.220                            | 1037.83             | 228.33              |
| A_68_P21101101 | chr2:29918413-29918457                            | NM_001204875:-3559 | Set        | PROMOTER               | 0.546                                           | 0.653                            | 878.99              | 574.01              | 0.357                            | 637.51              | 227.30              |

| ProbeName      | Target position of probe on CpG island microarray | TargetID           | GeneSymbol | CpG island Description | Ratio of relative methylation (TiO2-NP/Vehicle) | Sham group                       |                     |                     | TiO <sub>2</sub> -H group        |                     |                     |
|----------------|---------------------------------------------------|--------------------|------------|------------------------|-------------------------------------------------|----------------------------------|---------------------|---------------------|----------------------------------|---------------------|---------------------|
|                |                                                   |                    |            |                        |                                                 | Relative methylation (Cy-5/Cy-3) | Cy-3 signal (Input) | Cy-5 signal (MeDIP) | Relative methylation (Cy-5/Cy-3) | Cy-3 signal (Input) | Cy-5 signal (MeDIP) |
| A_68_P21101103 | chr2:29918555-29918605                            | NM_001204875:-3413 | Set        | PROMOTER               | 0.307                                           | 0.409                            | 1398.57             | 572.36              | 0.125                            | 1078.77             | 135.35              |
| A_68_P21101128 | chr2:29921642-29921686                            | NM_001204875:-329  | Set        | PROMOTER               | 0.455                                           | 1.532                            | 2617.19             | 4010.37             | 0.697                            | 1966.23             | 1369.69             |
| A_68_P31857881 | chr18:79305640-79305684                           | NM_053099:468      | Setbp1     | INSIDE                 | 0.474                                           | 0.628                            | 5152.73             | 3235.64             | 0.298                            | 3688.43             | 1097.86             |
| A_68_P25507247 | chr7:134920536-134920580                          | NM_178029:-344     | Setd1a     | PROMOTER               | 0.481                                           | 0.341                            | 3262.41             | 1113.63             | 0.164                            | 2654.59             | 435.65              |
| A_68_P28726320 | chr12:109416772-109416817                         | NM_028262:700      | Setd3      | INSIDE                 | 0.178                                           | 0.516                            | 1860.07             | 959.94              | 0.092                            | 1310.87             | 120.28              |
| A_68_P24757362 | chr6:113027834-113027882                          | NM_028385:226      | Setd5      | INSIDE                 | 0.171                                           | 0.685                            | 1325.64             | 907.99              | 0.117                            | 1037.87             | 121.43              |
| A_68_P26084862 | chr8:98240139-98240183                            | NM_001035123:348   | Setd6      | INSIDE                 | 0.452                                           | 0.669                            | 1856.95             | 1242.26             | 0.303                            | 1431.39             | 433.21              |
| A_68_P26084863 | chr8:98240210-98240254                            | NM_001035123:420   | Setd6      | INSIDE                 | 0.374                                           | 0.665                            | 1819.01             | 1209.95             | 0.249                            | 1391.57             | 346.00              |
| A_68_P24061289 | chr5:124890348-124890392                          | NM_030241:432      | Setd8      | INSIDE                 | 0.499                                           | 0.534                            | 4435.36             | 2367.73             | 0.266                            | 3424.01             | 912.46              |
| A_68_P21095246 | chr2:28980261-28980312                            | NM_198033:-225     | Setx       | PROMOTER               | 0.317                                           | 0.507                            | 1048.02             | 531.44              | 0.161                            | 734.92              | 118.04              |
| A_68_P21095247 | chr2:28980444-28980489                            | NM_198033:-45      | Setx       | PROMOTER               | 0.225                                           | 0.478                            | 3232.84             | 1546.02             | 0.108                            | 2561.81             | 276.11              |
| A_68_P27940380 | chr11:77744288-77744332                           | NM_021286:-134     | Sez6       | DIVERGENT_PROMOTER     | 0.236                                           | 0.644                            | 2433.21             | 1565.98             | 0.152                            | 1867.18             | 283.94              |
| A_68_P27940386 | chr11:77745058-77745102                           | NM_021286:636      | Sez6       | INSIDE                 | 0.306                                           | 0.543                            | 1094.97             | 595.09              | 0.166                            | 867.73              | 144.19              |
| A_68_P23993052 | chr5:113005975-113006019                          | NM_019982:209      | Sez6l      | INSIDE                 | 0.286                                           | 0.594                            | 2040.56             | 1211.37             | 0.170                            | 1645.50             | 279.06              |
| A_68_P23993053 | chr5:113006095-113006139                          | NM_019982:89       | Sez6l      | INSIDE                 | 0.536                                           | 0.541                            | 3984.37             | 2155.95             | 0.290                            | 3078.01             | 892.33              |
| A_68_P23993055 | chr5:113006360-113006404                          | NM_019982:-177     | Sez6l      | PROMOTER               | 0.431                                           | 0.471                            | 1700.24             | 800.51              | 0.203                            | 1326.27             | 268.88              |
| A_68_P31934219 | chr19:6363498-6363542                             | NM_001110791:-169  | Sfl        | PROMOTER               | 0.617                                           | 0.631                            | 1450.81             | 916.02              | 0.389                            | 1059.31             | 412.36              |
| A_68_P31934220 | chr19:6363615-6363659                             | NM_001110791:-53   | Sfl        | PROMOTER               | 0.204                                           | 0.566                            | 2062.29             | 1168.25             | 0.115                            | 1363.93             | 157.53              |
| A_68_P27285561 | chr10:80261463-80261507                           | NM_013651:5        | Sf3a2      | INSIDE                 | 0.225                                           | 0.461                            | 1503.32             | 692.75              | 0.104                            | 1146.08             | 118.93              |
| A_68_P23269837 | chr4:124386139-124386183                          | NM_029157:-5944    | Sf3a3      | PROMOTER               | 0.464                                           | 0.728                            | 3183.11             | 2317.38             | 0.338                            | 2323.93             | 785.44              |
| A_68_P20240053 | chr1:55084178-55084222                            | NM_031179:122      | Sf3b1      | INSIDE                 | 0.226                                           | 0.444                            | 1384.17             | 614.65              | 0.100                            | 1143.74             | 114.79              |
| A_68_P20240054 | chr1:55084325-55084372                            | NM_031179:-26      | Sf3b1      | PROMOTER               | 0.334                                           | 0.467                            | 1224.59             | 572.11              | 0.156                            | 1049.46             | 163.67              |
| A_68_P22347940 | chr3:95976314-95976359                            | NM_153053:-136     | Sf3b4      | PROMOTER               | 0.419                                           | 0.579                            | 1023.64             | 592.25              | 0.242                            | 971.97              | 235.52              |
| A_68_P26948616 | chr10:12728440-12728484                           | NM_175102:207      | Sf3b5      | INSIDE                 | 0.507                                           | 0.432                            | 2366.77             | 1022.64             | 0.219                            | 1933.08             | 423.55              |
| A_68_P26948617 | chr10:12728567-12728611                           | NM_175102:333      | Sf3b5      | INSIDE                 | 0.277                                           | 0.474                            | 1273.32             | 603.31              | 0.131                            | 1126.82             | 147.89              |
| A_68_P26948618 | chr10:12728670-12728714                           | NM_175102:437      | Sf3b5      | INSIDE                 | 0.442                                           | 0.533                            | 2051.96             | 1092.68             | 0.235                            | 1666.12             | 391.82              |
| A_68_P29507574 | chr14:31528289-31528333                           | NM_001166531:-42   | Sfmbt1     | PROMOTER               | 0.643                                           | 0.676                            | 961.67              | 650.19              | 0.435                            | 775.40              | 337.34              |
| A_68_P21000515 | chr2:10296432-10296476                            | NM_001198809:2392  | Sfmbt2     | INSIDE                 | 0.278                                           | 0.559                            | 1165.84             | 652.28              | 0.156                            | 966.25              | 150.45              |
| A_68_P21420761 | chr2:90955447-90955493                            | NM_011355:18517    | Sfpi1      | INSIDE                 | 0.211                                           | 0.616                            | 2220.61             | 1367.15             | 0.130                            | 1646.00             | 213.32              |
| A_68_P22286829 | chr3:83568459-83568506                            | NM_009144:-1760    | Sfrp2      | PROMOTER               | 0.291                                           | 0.395                            | 1409.56             | 556.86              | 0.115                            | 1077.22             | 124.04              |
| A_68_P22286848 | chr3:83570629-83570673                            | NM_009144:408      | Sfrp2      | INSIDE                 | 0.441                                           | 0.580                            | 3003.67             | 1742.06             | 0.256                            | 2242.65             | 574.07              |
| A_68_P22286849 | chr3:83570700-83570744                            | NM_009144:480      | Sfrp2      | INSIDE                 | 0.506                                           | 0.704                            | 2903.66             | 2044.40             | 0.357                            | 2270.81             | 809.60              |
| A_68_P22286850 | chr3:83570771-83570815                            | NM_009144:550      | Sfrp2      | INSIDE                 | 0.479                                           | 0.595                            | 1282.53             | 762.50              | 0.285                            | 914.27              | 260.51              |
| A_68_P28863266 | chr13:19714869-19714913                           | NM_016687:-153     | Sfrp4      | DIVERGENT_PROMOTER     | 0.534                                           | 0.699                            | 1695.05             | 1184.97             | 0.373                            | 1424.99             | 531.78              |
| A_68_P28863267 | chr13:19714988-19715032                           | NM_016687:33       | Sfrp4      | DIVERGENT_PROMOTER     | 0.576                                           | 0.589                            | 1211.63             | 713.85              | 0.340                            | 957.44              | 325.14              |
| A_68_P24089364 | chr5:130007431-130007475                          | NM_172276:347      | Sfswap     | INSIDE                 | 0.217                                           | 0.422                            | 1659.11             | 700.53              | 0.091                            | 1319.24             | 120.65              |
| A_68_P24089368 | chr5:130007907-130007951                          | NM_172276:823      | Sfswap     | INSIDE                 | 0.359                                           | 0.505                            | 1512.54             | 763.12              | 0.181                            | 1144.55             | 207.54              |
| A_68_P20793340 | chr1:167124392-167124436                          | NM_145512:150      | Sft2d2     | INSIDE                 | 0.656                                           | 0.691                            | 1278.22             | 883.79              | 0.453                            | 1099.45             | 498.32              |
| A_68_P29047306 | chr13:54167631-54167675                           | NM_027324:439      | Sfxn1      | INSIDE                 | 0.163                                           | 0.584                            | 1716.87             | 1002.57             | 0.095                            | 1252.42             | 119.43              |
| A_68_P24604447 | chr6:85282597-85282641                            | NM_178639:798      | Sfxn5      | INSIDE                 | 0.303                                           | 0.371                            | 2852.15             | 1057.76             | 0.112                            | 2147.87             | 241.55              |
| A_68_P24604448 | chr6:85282737-85282781                            | NM_178639:658      | Sfxn5      | INSIDE                 | 0.257                                           | 0.485                            | 1204.68             | 584.81              | 0.125                            | 958.93              | 119.47              |
| A_68_P24604449 | chr6:85282873-85282917                            | NM_178639:522      | Sfxn5      | INSIDE                 | 0.316                                           | 0.519                            | 1896.78             | 984.59              | 0.164                            | 1488.04             | 243.94              |
| A_68_P28035860 | chr11:94840370-94840414                           | NM_009161:-2751    | Sgca       | PROMOTER               | 0.287                                           | 0.710                            | 1261.96             | 896.40              | 0.204                            | 952.35              | 194.21              |
| A_68_P28035861 | chr11:94840510-94840554                           | NM_009161:-2891    | Sgca       | PROMOTER               | 0.521                                           | 0.655                            | 892.65              | 584.79              | 0.341                            | 755.20              | 257.88              |



| ProbeName      | Target position of probe on CpG island microarray | TargetID          | GeneSymbol | CpG island Description | Ratio of relative methylation (TiO2-NP/Vehicle) | Sham group                       |                     |                     | TiO <sub>2</sub> -H group        |                     |                     |
|----------------|---------------------------------------------------|-------------------|------------|------------------------|-------------------------------------------------|----------------------------------|---------------------|---------------------|----------------------------------|---------------------|---------------------|
|                |                                                   |                   |            |                        |                                                 | Relative methylation (Cy-5/Cy-3) | Cy-3 signal (Input) | Cy-5 signal (MeDIP) | Relative methylation (Cy-5/Cy-3) | Cy-3 signal (Input) | Cy-5 signal (MeDIP) |
| A_68_P23162218 | chr4:102432046-102432090                          | NM_144906:-899    | Sgip1      | PROMOTER               | 0.538                                           | 0.433                            | 1480.49             | 640.74              | 0.233                            | 1296.96             | 301.71              |
| A_68_P26995733 | chr10:21602269-21602313                           | NM_001161845:301  | Sgk1       | INSIDE                 | 0.266                                           | 0.534                            | 1247.06             | 666.50              | 0.142                            | 1019.87             | 144.79              |
| A_68_P26996378 | chr10:21714127-21714171                           | NM_011361:-323    | Sgk1       | PROMOTER               | 0.431                                           | 0.625                            | 1978.07             | 1236.73             | 0.270                            | 1444.33             | 389.40              |
| A_68_P32070012 | chr19:32462008-32462052                           | NM_144792:914     | Sgms1      | INSIDE                 | 0.465                                           | 0.636                            | 2021.00             | 1284.89             | 0.295                            | 1504.70             | 444.42              |
| A_68_P20370950 | chr1:78306691-78306735                            | NM_001004173:-208 | Sgpp2      | PROMOTER               | 0.274                                           | 0.506                            | 2193.77             | 1109.05             | 0.139                            | 1814.46             | 251.35              |
| A_68_P20370954 | chr1:78307126-78307170                            | NM_001004173:228  | Sgpp2      | INSIDE                 | 0.372                                           | 0.570                            | 1032.22             | 588.69              | 0.212                            | 541.15              | 114.83              |
| A_68_P23997297 | chr5:113716248-113716292                          | NR_027934:-6649   | Sgsm1      | PROMOTER               | 0.347                                           | 0.691                            | 2844.68             | 1966.65             | 0.240                            | 2188.28             | 525.11              |
| A_68_P23997299 | chr5:113716482-113716526                          | NR_027934:-6883   | Sgsm1      | PROMOTER               | 0.206                                           | 0.632                            | 1542.14             | 974.42              | 0.130                            | 1093.21             | 142.15              |
| A_68_P23997436 | chr5:113739937-113739981                          | NM_172718:-152    | Sgsm1      | PROMOTER               | 0.235                                           | 0.668                            | 1154.23             | 770.79              | 0.157                            | 1014.52             | 158.92              |
| A_68_P27923087 | chr11:74709868-74709912                           | NM_197943:692     | Sgsm2      | INSIDE                 | 0.507                                           | 0.520                            | 1107.95             | 576.24              | 0.264                            | 894.69              | 236.03              |
| A_68_P29288686 | chr13:104899839-104899883                         | NM_144838:-9      | Sgtb       | DIVERGENT_PROMOTER     | 0.140                                           | 0.641                            | 2931.60             | 1878.98             | 0.090                            | 2053.70             | 183.87              |
| A_68_P29288687 | chr13:104899925-104899970                         | NM_144838:78      | Sgtb       | INSIDE                 | 0.527                                           | 0.658                            | 3487.76             | 2296.13             | 0.347                            | 2668.97             | 926.00              |
| A_68_P29288689 | chr13:104900121-104900165                         | NM_144838:273     | Sgtb       | INSIDE                 | 0.398                                           | 0.583                            | 3354.69             | 1956.35             | 0.232                            | 2336.34             | 542.22              |
| A_68_P25500723 | chr7:133618294-133618338                          | NM_011363:328     | Sh2b1      | INSIDE                 | 0.575                                           | 0.689                            | 1287.82             | 887.81              | 0.396                            | 1062.67             | 420.92              |
| A_68_P24120066 | chr5:136707860-136707905                          | NM_018825:12891   | Sh2b2      | INSIDE                 | 0.601                                           | 2.852                            | 1914.56             | 5460.69             | 1.713                            | 1297.49             | 2222.73             |
| A_68_P24120067 | chr5:136707928-136707972                          | NM_018825:12823   | Sh2b2      | INSIDE                 | 0.531                                           | 2.580                            | 2576.89             | 6648.62             | 1.370                            | 1811.15             | 2481.20             |
| A_68_P24120068 | chr5:136708025-136708069                          | NM_018825:12727   | Sh2b2      | INSIDE                 | 0.529                                           | 2.946                            | 1957.15             | 5765.04             | 1.560                            | 1345.02             | 2097.57             |
| A_68_P24046791 | chr5:122286329-122286373                          | NM_008507:460     | Sh2b3      | INSIDE                 | 0.557                                           | 0.520                            | 1493.26             | 776.52              | 0.290                            | 1281.16             | 371.15              |
| A_68_P23344730 | chr4:137806358-137806402                          | NM_001099631:55   | Sh2d5      | INSIDE                 | 0.509                                           | 0.413                            | 2445.43             | 1010.44             | 0.210                            | 1774.98             | 373.19              |
| A_68_P23594807 | chr5:34868707-34868751                            | NM_011893:296     | Sh3bp2     | INSIDE                 | 0.150                                           | 2.222                            | 4823.82             | 10720.52            | 0.333                            | 3204.04             | 1067.04             |
| A_68_P20427307 | chr1:90967569-90967615                            | NM_133816:556     | Sh3bp4     | INSIDE                 | 0.218                                           | 0.556                            | 2192.39             | 1219.94             | 0.121                            | 1649.27             | 199.62              |
| A_68_P20427310 | chr1:90967840-90967891                            | NM_133816:829     | Sh3bp4     | INSIDE                 | 0.229                                           | 0.686                            | 1010.05             | 693.00              | 0.157                            | 747.24              | 117.40              |
| A_68_P29512055 | chr14:32248911-32248955                           | NM_011894:287     | Sh3bp5     | INSIDE                 | 0.171                                           | 0.372                            | 2699.92             | 1005.53             | 0.064                            | 1824.95             | 116.34              |
| A_68_P27830409 | chr11:58144073-58144117                           | NM_001161338:-125 | Sh3bp5l    | DIVERGENT_PROMOTER     | 0.324                                           | 0.681                            | 1229.07             | 836.78              | 0.220                            | 858.93              | 189.18              |
| A_68_P31253475 | chr17:56176053-56176097                           | NM_013664:-75     | Sh3gl1     | DIVERGENT_PROMOTER     | 0.550                                           | 0.553                            | 4830.53             | 2671.43             | 0.304                            | 3637.50             | 1106.08             |
| A_68_P23072588 | chr4:84851180-84851224                            | NM_019535:-157    | Sh3gl2     | PROMOTER               | 0.527                                           | 0.624                            | 863.04              | 538.62              | 0.329                            | 831.01              | 273.33              |
| A_68_P32775563 | chrX:156064795-156064839                          | NM_001135727:-523 | Sh3kbp1    | PROMOTER               | 0.152                                           | 1.691                            | 1378.43             | 2330.66             | 0.257                            | 510.94              | 131.07              |
| A_68_P32775570 | chrX:156065828-156065872                          | NM_001135727:511  | Sh3kbp1    | INSIDE                 | 0.292                                           | 1.517                            | 2708.20             | 4109.38             | 0.443                            | 1044.62             | 462.77              |
| A_68_P32775571 | chrX:156065929-156065973                          | NM_001135727:611  | Sh3kbp1    | INSIDE                 | 0.262                                           | 2.135                            | 1953.68             | 4170.95             | 0.559                            | 864.18              | 482.74              |
| A_68_P32150072 | chr19:47538682-47538726                           | NM_001164717:197  | Sh3pxd2a   | INSIDE                 | 0.655                                           | 0.608                            | 1522.14             | 924.88              | 0.398                            | 1241.86             | 493.98              |
| A_68_P27688273 | chr11:32248073-32248117                           | NM_177364:284     | Sh3pxd2b   | INSIDE                 | 0.643                                           | 0.738                            | 4627.14             | 3415.56             | 0.475                            | 3784.82             | 1797.77             |
| A_68_P25908463 | chr8:63702506-63702553                            | NM_021506:-438    | Sh3rf1     | PROMOTER               | 0.292                                           | 0.459                            | 1306.91             | 599.66              | 0.134                            | 1163.87             | 156.17              |
| A_68_P27165500 | chr10:58275328-58275372                           | NM_172788:-756    | Sh3rf3     | PROMOTER               | 0.329                                           | 0.424                            | 1488.26             | 630.44              | 0.140                            | 1073.55             | 149.81              |
| A_68_P27165510 | chr10:58276430-58276477                           | NM_172788:347     | Sh3rf3     | INSIDE                 | 0.161                                           | 0.566                            | 2763.45             | 1563.59             | 0.091                            | 1999.48             | 182.00              |
| A_68_P27165511 | chr10:58276497-58276541                           | NM_172788:412     | Sh3rf3     | INSIDE                 | 0.470                                           | 0.573                            | 1509.66             | 865.21              | 0.270                            | 1204.93             | 324.88              |
| A_68_P28328450 | chr12:31596678-31596722                           | NM_013709:167     | Sh3y1l     | INSIDE                 | 0.433                                           | 0.687                            | 1307.89             | 898.56              | 0.297                            | 1149.46             | 341.59              |
| A_68_P25605218 | chr7:151361386-151361430                          | NM_001113373:-16  | Shank2     | PROMOTER               | 0.424                                           | 0.512                            | 2129.65             | 1090.85             | 0.217                            | 1528.90             | 332.09              |
| A_68_P30425525 | chr15:89329138-89329182                           | NM_021423:-1127   | Shank3     | PROMOTER               | 0.394                                           | 0.589                            | 1347.03             | 794.03              | 0.232                            | 1002.00             | 232.85              |
| A_68_P27277986 | chr10:79100770-79100814                           | NM_001024539:-129 | Shc2       | PROMOTER               | 0.431                                           | 0.504                            | 1121.40             | 564.70              | 0.217                            | 942.73              | 204.84              |
| A_68_P29033147 | chr13:51663043-51663087                           | NM_009167:-611    | Shc3       | PROMOTER               | 0.218                                           | 0.502                            | 1396.09             | 701.39              | 0.109                            | 1078.14             | 117.96              |
| A_68_P29033148 | chr13:51663167-51663218                           | NM_009167:-739    | Shc3       | PROMOTER               | 0.213                                           | 0.559                            | 1402.04             | 784.25              | 0.119                            | 985.98              | 117.27              |
| A_68_P21604382 | chr2:125548878-125548922                          | NM_199022:984     | Shc4       | INSIDE                 | 0.565                                           | 0.409                            | 1504.09             | 614.77              | 0.231                            | 1178.89             | 272.42              |
| A_68_P25618723 | chr8:4779387-4779431                              | NM_011369:126     | Shcgp1     | INSIDE                 | 0.506                                           | 0.369                            | 1739.58             | 641.96              | 0.187                            | 1489.84             | 278.05              |
| A_68_P31253054 | chr17:56109780-56109824                           | NM_001159523:-102 | Shd        | PROMOTER               | 0.611                                           | 0.544                            | 2327.83             | 1266.72             | 0.333                            | 1596.29             | 530.99              |

| ProbeName      | Target position of probe on CpG island microarray | TargetID           | GeneSymbol | CpG island Description | Ratio of relative methylation (TiO2-NP/Vehicle) | Sham group                       |                     |                     | TiO <sub>2</sub> -H group        |                     |                     |
|----------------|---------------------------------------------------|--------------------|------------|------------------------|-------------------------------------------------|----------------------------------|---------------------|---------------------|----------------------------------|---------------------|---------------------|
|                |                                                   |                    |            |                        |                                                 | Relative methylation (Cy-5/Cy-3) | Cy-3 signal (Input) | Cy-5 signal (MeDIP) | Relative methylation (Cy-5/Cy-3) | Cy-3 signal (Input) | Cy-5 signal (MeDIP) |
| A_68_P31253055 | chr17:56109896-56109940                           | NM_001159523:14    | Shd        | INSIDE                 | 0.564                                           | 0.518                            | 4610.58             | 2387.13             | 0.292                            | 3559.17             | 1038.80             |
| A_68_P21585949 | chr2:122174591-122174635                          | NM_001013829:20042 | Shf        | DOWNSTREAM             | 0.266                                           | 0.532                            | 1138.26             | 605.30              | 0.142                            | 932.96              | 132.20              |
| A_68_P23768841 | chr5:67998640-67998694                            | NM_001033415:-455  | Shisa3     | PROMOTER               | 0.215                                           | 0.548                            | 1358.69             | 745.24              | 0.118                            | 1042.23             | 123.18              |
| A_68_P27877798 | chr11:66340379-66340423                           | NM_001034874:-772  | Shisa6     | PROMOTER               | 0.477                                           | 0.563                            | 2271.08             | 1279.17             | 0.269                            | 1743.23             | 468.57              |
| A_68_P24950722 | chr7:4781562-4781606                              | NM_172737:14714    | Shisa7     | INSIDE                 | 0.605                                           | 2.517                            | 2137.86             | 5380.02             | 1.523                            | 1644.26             | 2504.79             |
| A_68_P24950723 | chr7:4781645-4781689                              | NM_172737:14632    | Shisa7     | INSIDE                 | 0.491                                           | 2.830                            | 3360.14             | 9507.66             | 1.390                            | 2245.47             | 3120.90             |
| A_68_P24950803 | chr7:4795789-4795833                              | NM_172737:488      | Shisa7     | INSIDE                 | 0.271                                           | 0.408                            | 1569.89             | 641.13              | 0.110                            | 1181.68             | 130.56              |
| A_68_P24950806 | chr7:4796112-4796158                              | NM_172737:164      | Shisa7     | INSIDE                 | 0.121                                           | 1.807                            | 1285.74             | 2323.97             | 0.219                            | 728.10              | 159.74              |
| A_68_P24950807 | chr7:4796189-4796233                              | NM_172737:88       | Shisa7     | INSIDE                 | 0.126                                           | 1.434                            | 3560.55             | 5105.55             | 0.180                            | 2393.68             | 432.05              |
| A_68_P30550103 | chr16:11983989-11984033                           | NM_001174086:-195  | Shisa9     | PROMOTER               | 0.236                                           | 0.466                            | 1546.59             | 721.02              | 0.110                            | 1081.69             | 118.95              |
| A_68_P30550105 | chr16:11984315-11984359                           | NM_001174086:131   | Shisa9     | INSIDE                 | 0.440                                           | 0.578                            | 2001.15             | 1155.68             | 0.254                            | 1514.02             | 385.06              |
| A_68_P25016883 | chr7:28140851-28140895                            | NM_138676:155      | Shkbp1     | INSIDE                 | 0.430                                           | 0.495                            | 3331.24             | 1648.27             | 0.213                            | 2575.41             | 547.99              |
| A_68_P27844938 | chr11:60624796-60624840                           | NM_009171:-51      | Shmt1      | PROMOTER               | 0.379                                           | 0.654                            | 3482.45             | 2278.99             | 0.248                            | 2969.94             | 736.22              |
| A_68_P32185502 | chr19:54019941-54019985                           | NM_019658:597      | Shoc2      | INSIDE                 | 0.534                                           | 0.645                            | 1907.01             | 1229.57             | 0.344                            | 1454.47             | 500.38              |
| A_68_P32185503 | chr19:54020036-54020080                           | NM_019658:693      | Shoc2      | INSIDE                 | 0.304                                           | 0.576                            | 1786.87             | 1029.32             | 0.175                            | 1393.04             | 243.57              |
| A_68_P22207866 | chr3:66782104-66782148                            | NM_013665:3567     | Shox2      | INSIDE                 | 0.325                                           | 0.738                            | 3000.19             | 2215.07             | 0.240                            | 2068.51             | 496.71              |
| A_68_P22207872 | chr3:66782957-66783001                            | NM_013665:2715     | Shox2      | INSIDE                 | 0.216                                           | 0.639                            | 1015.17             | 648.97              | 0.138                            | 890.26              | 122.84              |
| A_68_P27915802 | chr11:73012820-73012864                           | NM_029031:-141     | Shpk       | DIVERGENT_PROMOTER     | 0.328                                           | 0.550                            | 1385.83             | 762.72              | 0.180                            | 1062.94             | 191.67              |
| A_68_P27915806 | chr11:73013237-73013281                           | NM_029031:275      | Shpk       | INSIDE                 | 0.537                                           | 0.571                            | 1243.69             | 710.72              | 0.307                            | 961.60              | 295.21              |
| A_68_P27915807 | chr11:73013310-73013355                           | NM_029031:349      | Shpk       | INSIDE                 | 0.282                                           | 0.649                            | 903.19              | 586.29              | 0.183                            | 628.50              | 114.93              |
| A_68_P24693485 | chr6:100620652-100620698                          | NM_181590:477      | Shq1       | INSIDE                 | 0.335                                           | 0.657                            | 899.49              | 590.54              | 0.220                            | 840.75              | 185.09              |
| A_68_P27804858 | chr11:53270789-53270833                           | NM_027917:104      | Shroom1    | INSIDE                 | 0.576                                           | 0.401                            | 1370.05             | 549.13              | 0.231                            | 1092.37             | 252.36              |
| A_68_P27804859 | chr11:53270871-53270915                           | NM_027917:186      | Shroom1    | INSIDE                 | 0.625                                           | 0.380                            | 1868.92             | 710.80              | 0.238                            | 1462.56             | 347.79              |
| A_68_P27804893 | chr11:53276844-53276888                           | NM_027917:6160     | Shroom1    | INSIDE                 | 0.519                                           | 0.595                            | 906.20              | 539.18              | 0.309                            | 811.85              | 250.84              |
| A_68_P27804916 | chr11:53280008-53280053                           | NM_027917:9324     | Shroom1    | INSIDE                 | 0.195                                           | 0.707                            | 2162.09             | 1527.52             | 0.138                            | 1797.46             | 247.22              |
| A_68_P32234209 | chrX:5977910-5977954                              | NM_001040459:670   | Shroom4    | INSIDE                 | 0.467                                           | 1.426                            | 3548.57             | 5061.29             | 0.666                            | 1349.60             | 899.01              |
| A_68_P32796352 | chrX:160514293-160514337                          | NM_009173:-333     | Siah1b     | PROMOTER               | 0.221                                           | 1.672                            | 1531.25             | 2560.23             | 0.369                            | 718.98              | 265.23              |
| A_68_P22169677 | chr3:58496154-58496198                            | NM_009174:134      | Siah2      | INSIDE                 | 0.368                                           | 0.501                            | 1256.52             | 629.58              | 0.184                            | 1022.76             | 188.36              |
| A_68_P22169678 | chr3:58496243-58496287                            | NM_009174:46       | Siah2      | INSIDE                 | 0.590                                           | 0.678                            | 1708.09             | 1158.64             | 0.400                            | 1488.06             | 595.39              |
| A_68_P22169679 | chr3:58496414-58496458                            | NM_009174:-126     | Siah2      | PROMOTER               | 0.504                                           | 0.590                            | 905.23              | 534.20              | 0.297                            | 801.03              | 238.01              |
| A_68_P22169681 | chr3:58496575-58496620                            | NM_009174:-287     | Siah2      | PROMOTER               | 0.468                                           | 0.542                            | 1220.30             | 661.62              | 0.254                            | 847.22              | 215.09              |
| A_68_P30720961 | chr16:44332811-44332855                           | NM_001159419:119   | Sid1       | INSIDE                 | 0.211                                           | 0.514                            | 1403.51             | 721.28              | 0.108                            | 1057.45             | 114.47              |
| A_68_P22864088 | chr4:41687513-41687565                            | NM_011014:648      | Sigmar1    | INSIDE                 | 0.605                                           | 0.638                            | 872.40              | 556.37              | 0.386                            | 665.26              | 256.65              |
| A_68_P22864089 | chr4:41687680-41687724                            | NM_011014:484      | Sigmar1    | INSIDE                 | 0.275                                           | 0.517                            | 2643.94             | 1365.98             | 0.142                            | 1826.63             | 259.12              |
| A_68_P31142312 | chr17:31992898-31992942                           | NM_010831:-183     | Sik1       | PROMOTER               | 0.362                                           | 0.545                            | 1357.06             | 739.91              | 0.197                            | 1298.38             | 256.01              |
| A_68_P31142314 | chr17:31993086-31993130                           | NM_010831:-371     | Sik1       | PROMOTER               | 0.172                                           | 0.504                            | 1973.59             | 994.89              | 0.087                            | 1737.94             | 150.89              |
| A_68_P31142315 | chr17:31993161-31993205                           | NM_010831:-445     | Sik1       | PROMOTER               | 0.124                                           | 0.520                            | 2504.48             | 1302.91             | 0.065                            | 1876.04             | 121.20              |
| A_68_P26506990 | chr9:50816646-50816690                            | NM_178710:510      | Sik2       | INSIDE                 | 0.421                                           | 0.666                            | 1460.48             | 972.49              | 0.280                            | 1189.96             | 333.71              |
| A_68_P26477291 | chr9:45821396-45821440                            | NM_027498:516      | Sik3       | INSIDE                 | 0.464                                           | 0.484                            | 1634.85             | 790.55              | 0.225                            | 1437.46             | 322.78              |
| A_68_P27131116 | chr10:50614810-50614854                           | NM_011376:-624     | Sim1       | PROMOTER               | 0.319                                           | 0.516                            | 2206.95             | 1138.45             | 0.164                            | 1878.92             | 308.99              |
| A_68_P27131118 | chr10:50615055-50615099                           | NM_011376:-380     | Sim1       | PROMOTER               | 0.620                                           | 0.677                            | 1119.43             | 757.96              | 0.419                            | 930.01              | 390.13              |
| A_68_P27131168 | chr10:50620782-50620826                           | NM_011376:5348     | Sim1       | INSIDE                 | 0.175                                           | 0.712                            | 1361.61             | 969.35              | 0.124                            | 978.40              | 121.59              |
| A_68_P30979305 | chr16:94083673-94083718                           | NM_011377:-1809    | Sim2       | PROMOTER               | 0.333                                           | 0.645                            | 851.23              | 549.43              | 0.215                            | 704.95              | 151.40              |
| A_68_P30979311 | chr16:94084490-94084534                           | NM_011377:-992     | Sim2       | PROMOTER               | 0.520                                           | 0.552                            | 1013.62             | 559.29              | 0.287                            | 862.01              | 247.44              |

| ProbeName      | Target position of probe on CpG island microarray | TargetID           | GeneSymbol | CpG island Description | Ratio of relative methylation (TiO2-NP/Vehicle) | Sham group                       |                     |                     | TiO <sub>2</sub> -H group        |                     |                     |
|----------------|---------------------------------------------------|--------------------|------------|------------------------|-------------------------------------------------|----------------------------------|---------------------|---------------------|----------------------------------|---------------------|---------------------|
|                |                                                   |                    |            |                        |                                                 | Relative methylation (Cy-5/Cy-3) | Cy-3 signal (Input) | Cy-5 signal (MeDIP) | Relative methylation (Cy-5/Cy-3) | Cy-3 signal (Input) | Cy-5 signal (MeDIP) |
| A_68_P30979318 | chr16:94085768-94085812                           | NM_011377:286      | Sim2       | INSIDE                 | 0.502                                           | 0.551                            | 1614.65             | 889.06              | 0.276                            | 1302.63             | 360.09              |
| A_68_P30979319 | chr16:94085864-94085908                           | NM_011377:382      | Sim2       | INSIDE                 | 0.381                                           | 0.402                            | 2426.59             | 975.03              | 0.153                            | 1954.83             | 299.27              |
| A_68_P30979328 | chr16:94087095-94087143                           | NM_011377:1614     | Sim2       | INSIDE                 | 0.227                                           | 0.487                            | 1307.82             | 636.43              | 0.110                            | 1033.86             | 114.14              |
| A_68_P30979595 | chr16:94346850-94346894                           | NM_011377:261368   | Sim2       | INSIDE                 | 0.164                                           | 0.696                            | 2233.47             | 1553.92             | 0.114                            | 1799.55             | 205.68              |
| A_68_P30979597 | chr16:94347042-94347086                           | NM_011377:261560   | Sim2       | INSIDE                 | 0.473                                           | 0.532                            | 2893.16             | 1538.32             | 0.251                            | 2255.31             | 566.90              |
| A_68_P26540068 | chr9:56920704-56920750                            | NM_001110350:-3456 | Sin3a      | PROMOTER               | 0.086                                           | 0.589                            | 3349.84             | 1973.10             | 0.051                            | 2397.22             | 122.00              |
| A_68_P26540093 | chr9:56924054-56924108                            | NM_001110350:-102  | Sin3a      | PROMOTER               | 0.117                                           | 0.635                            | 2431.69             | 1544.02             | 0.075                            | 1730.32             | 129.05              |
| A_68_P26540098 | chr9:56924586-56924630                            | NM_001110350:426   | Sin3a      | INSIDE                 | 0.559                                           | 0.712                            | 3459.83             | 2462.91             | 0.398                            | 2827.68             | 1125.53             |
| A_68_P25962573 | chr8:75247186-75247230                            | NM_001113248:22    | Sin3b      | INSIDE                 | 0.459                                           | 0.500                            | 3570.22             | 1785.07             | 0.230                            | 2824.00             | 648.27              |
| A_68_P25962580 | chr8:75247857-75247901                            | NM_001113248:692   | Sin3b      | INSIDE                 | 0.667                                           | 0.564                            | 1820.03             | 1027.17             | 0.376                            | 1543.99             | 580.83              |
| A_68_P31929909 | chr19:5654397-5654451                             | NM_001164480:9283  | Sipa1      | INSIDE                 | 0.159                                           | 0.540                            | 1876.73             | 1013.72             | 0.086                            | 1353.16             | 116.39              |
| A_68_P31929913 | chr19:5654718-5654762                             | NM_001164480:8967  | Sipa1      | INSIDE                 | 0.260                                           | 0.609                            | 1556.45             | 947.97              | 0.159                            | 948.49              | 150.47              |
| A_68_P28585118 | chr12:83270099-83270143                           | NM_001167983:-882  | Sipa1l1    | PROMOTER               | 0.447                                           | 0.569                            | 2305.16             | 1312.09             | 0.255                            | 1793.11             | 456.73              |
| A_68_P28585128 | chr12:83271163-83271207                           | NM_001167983:182   | Sipa1l1    | INSIDE                 | 0.271                                           | 0.268                            | 2096.62             | 562.41              | 0.073                            | 1638.21             | 119.11              |
| A_68_P25023456 | chr7:29551693-29551750                            | NM_001122765:-49   | Sirt2      | DIVERGENT_PROMOTER     | 0.215                                           | 0.529                            | 1418.61             | 750.93              | 0.114                            | 1041.82             | 118.62              |
| A_68_P25023458 | chr7:29551865-29551909                            | NM_001122765:116   | Sirt2      | INSIDE                 | 0.627                                           | 0.640                            | 1524.09             | 974.95              | 0.401                            | 1180.08             | 473.61              |
| A_68_P25585438 | chr7:148067601-148067645                          | NM_001127351:146   | Sirt3      | INSIDE                 | 0.251                                           | 0.485                            | 2710.95             | 1314.97             | 0.122                            | 2100.29             | 255.63              |
| A_68_P25585439 | chr7:148067707-148067751                          | NM_001127351:40    | Sirt3      | INSIDE                 | 0.212                                           | 0.648                            | 4502.68             | 2916.34             | 0.137                            | 3126.92             | 429.10              |
| A_68_P25585441 | chr7:148067881-148067925                          | NM_001127351:-134  | Sirt3      | PROMOTER               | 0.425                                           | 0.664                            | 2052.05             | 1362.14             | 0.282                            | 1698.79             | 479.75              |
| A_68_P28185710 | chr11:120485805-120485849                         | NM_153056:490      | Sirt7      | INSIDE                 | 0.563                                           | 0.544                            | 1310.04             | 712.60              | 0.306                            | 1028.17             | 314.88              |
| A_68_P28751515 | chr12:113883521-113883565                         | NM_001161737:504   | Siva1      | INSIDE                 | 0.100                                           | 0.686                            | 2619.46             | 1797.55             | 0.068                            | 1845.59             | 126.25              |
| A_68_P28535261 | chr12:74146417-74146461                           | NM_009189:1261     | Six1       | INSIDE                 | 0.197                                           | 0.492                            | 1985.22             | 975.89              | 0.097                            | 1337.98             | 129.75              |
| A_68_P28535262 | chr12:74146492-74146537                           | NM_009189:1185     | Six1       | INSIDE                 | 0.170                                           | 0.666                            | 2732.43             | 1820.79             | 0.113                            | 1938.38             | 219.78              |
| A_68_P28535264 | chr12:74146664-74146708                           | NM_009189:1013     | Six1       | INSIDE                 | 0.294                                           | 0.589                            | 1124.15             | 662.40              | 0.173                            | 841.12              | 145.60              |
| A_68_P28535265 | chr12:74146791-74146835                           | NM_009189:887      | Six1       | INSIDE                 | 0.144                                           | 0.419                            | 2479.21             | 1037.84             | 0.060                            | 2086.28             | 125.71              |
| A_68_P28535273 | chr12:74147578-74147622                           | NM_009189:99       | Six1       | INSIDE                 | 0.249                                           | 0.691                            | 1666.59             | 1152.26             | 0.172                            | 1355.58             | 233.54              |
| A_68_P28535335 | chr12:74154555-74154606                           | NM_009189:-6881    | Six1       | PROMOTER               | 0.312                                           | 0.700                            | 1656.51             | 1158.88             | 0.218                            | 1212.57             | 264.27              |
| A_68_P31412092 | chr17:86084426-86084470                           | NM_011380:3146     | Six2       | INSIDE                 | 0.439                                           | 0.648                            | 2333.49             | 1511.04             | 0.284                            | 1636.79             | 465.01              |
| A_68_P31412093 | chr17:86084523-86084567                           | NM_011380:3050     | Six2       | INSIDE                 | 0.302                                           | 0.590                            | 1185.81             | 700.21              | 0.178                            | 970.62              | 172.83              |
| A_68_P31412111 | chr17:86086474-86086527                           | NM_011380:1094     | Six2       | INSIDE                 | 0.247                                           | 0.516                            | 1216.26             | 627.03              | 0.127                            | 937.53              | 119.16              |
| A_68_P31412112 | chr17:86086622-86086666                           | NM_011380:950      | Six2       | INSIDE                 | 0.509                                           | 0.627                            | 1292.35             | 809.94              | 0.319                            | 1152.84             | 367.85              |
| A_68_P31412148 | chr17:86091318-86091363                           | NM_011380:-3746    | Six2       | PROMOTER               | 0.180                                           | 0.475                            | 1908.55             | 906.61              | 0.085                            | 1365.48             | 116.60              |
| A_68_P31412149 | chr17:86091406-86091450                           | NM_011380:-3834    | Six2       | PROMOTER               | 0.249                                           | 0.609                            | 942.97              | 574.15              | 0.152                            | 787.60              | 119.40              |
| A_68_P31412155 | chr17:86092046-86092090                           | NM_011380:-4474    | Six2       | PROMOTER               | 0.282                                           | 0.451                            | 1703.10             | 768.03              | 0.127                            | 1391.83             | 176.85              |
| A_68_P31411759 | chr17:86020803-86020847                           | NM_011381:651      | Six3       | INSIDE                 | 0.654                                           | 0.595                            | 2238.44             | 1332.71             | 0.389                            | 1756.08             | 683.90              |
| A_68_P31411765 | chr17:86021432-86021477                           | NM_011381:1281     | Six3       | INSIDE                 | 0.092                                           | 0.658                            | 2687.41             | 1769.21             | 0.060                            | 2029.65             | 122.78              |
| A_68_P31411656 | chr17:86007613-86007657                           | NR_038085:10102    | Six3os1    | INSIDE                 | 0.270                                           | 0.552                            | 1036.40             | 571.73              | 0.149                            | 835.90              | 124.37              |
| A_68_P31411711 | chr17:86014433-86014477                           | NR_038085:3282     | Six3os1    | INSIDE                 | 0.461                                           | 0.645                            | 1685.01             | 1087.39             | 0.297                            | 1367.96             | 406.57              |
| A_68_P31411737 | chr17:86017485-86017529                           | NR_038085:230      | Six3os1    | INSIDE                 | 0.186                                           | 0.508                            | 1666.57             | 847.22              | 0.094                            | 1286.03             | 121.31              |
| A_68_P31411739 | chr17:86017697-86017743                           | NR_038085:16       | Six3os1    | INSIDE                 | 0.208                                           | 0.478                            | 1661.34             | 794.86              | 0.099                            | 1227.89             | 122.08              |
| A_68_P28535622 | chr12:74213314-74213358                           | NM_011382:896      | Six4       | INSIDE                 | 0.098                                           | 0.458                            | 5157.11             | 2363.02             | 0.045                            | 4099.58             | 183.87              |
| A_68_P28535623 | chr12:74213467-74213511                           | NM_011382:744      | Six4       | INSIDE                 | 0.179                                           | 0.632                            | 1480.46             | 935.19              | 0.113                            | 1084.65             | 122.46              |
| A_68_P28535628 | chr12:74213900-74213944                           | NM_011382:310      | Six4       | INSIDE                 | 0.362                                           | 0.564                            | 2662.05             | 1501.38             | 0.204                            | 2072.53             | 422.87              |
| A_68_P28534661 | chr12:74040784-74040828                           | NM_011384:-125     | Six6       | PROMOTER               | 0.147                                           | 0.603                            | 2438.40             | 1471.16             | 0.089                            | 1838.01             | 163.19              |

| ProbeName      | Target position of probe on CpG island microarray | TargetID           | GeneSymbol | CpG island Description | Ratio of relative methylation (TiO2-NP/Vehicle) | Sham group                       |                     |                     | TiO <sub>2</sub> -H group        |                     |                     |
|----------------|---------------------------------------------------|--------------------|------------|------------------------|-------------------------------------------------|----------------------------------|---------------------|---------------------|----------------------------------|---------------------|---------------------|
|                |                                                   |                    |            |                        |                                                 | Relative methylation (Cy-5/Cy-3) | Cy-3 signal (Input) | Cy-5 signal (MeDIP) | Relative methylation (Cy-5/Cy-3) | Cy-3 signal (Input) | Cy-5 signal (MeDIP) |
| A_68_P28534662 | chr12:74040869-74040913                           | NM_011384:-41      | Six6       | PROMOTER               | 0.286                                           | 0.575                            | 2021.53             | 1162.50             | 0.164                            | 1466.62             | 240.87              |
| A_68_P28534667 | chr12:74041473-74041517                           | NM_011384:563      | Six6       | INSIDE                 | 0.201                                           | 0.707                            | 1249.09             | 883.01              | 0.142                            | 1026.02             | 145.52              |
| A_68_P31830207 | chr18:74367434-74367478                           | NM_001164355:16    | Ska1       | INSIDE                 | 0.330                                           | 0.675                            | 1542.09             | 1040.85             | 0.223                            | 1152.40             | 256.59              |
| A_68_P24447786 | chr6:51962237-51962281                            | NM_018773:290      | Skap2      | INSIDE                 | 0.383                                           | 0.510                            | 1892.49             | 965.77              | 0.195                            | 1579.61             | 308.51              |
| A_68_P24447788 | chr6:51962397-51962441                            | NM_018773:130      | Skap2      | INSIDE                 | 0.272                                           | 0.583                            | 1040.59             | 606.93              | 0.159                            | 746.70              | 118.55              |
| A_68_P24447792 | chr6:51962699-51962743                            | NM_018773:-172     | Skap2      | PROMOTER               | 0.176                                           | 0.552                            | 1572.06             | 867.38              | 0.097                            | 1213.14             | 118.04              |
| A_68_P23436702 | chr4:154524641-154524685                          | NM_011385:71982    | Ski        | DOWNSTREAM             | 0.228                                           | 0.707                            | 2730.88             | 1930.75             | 0.161                            | 1921.47             | 309.69              |
| A_68_P22031732 | chr3:30992663-30992708                            | NM_001039090:-1297 | Skil       | PROMOTER               | 0.175                                           | 0.538                            | 1678.20             | 903.20              | 0.094                            | 1223.13             | 114.95              |
| A_68_P22031733 | chr3:30992733-30992791                            | NM_001039090:-1220 | Skil       | PROMOTER               | 0.312                                           | 0.395                            | 1342.75             | 530.78              | 0.123                            | 1018.17             | 125.63              |
| A_68_P22031742 | chr3:30994277-30994321                            | NM_001039090:316   | Skil       | INSIDE                 | 0.433                                           | 0.684                            | 5333.16             | 3650.43             | 0.296                            | 4142.42             | 1227.29             |
| A_68_P29337690 | chr13:113717502-113717546                         | NM_028151:64       | Skiv2l2    | INSIDE                 | 0.300                                           | 0.574                            | 986.30              | 565.81              | 0.172                            | 703.81              | 121.22              |
| A_68_P26574086 | chr9:62990509-62990553                            | NM_172446:4257     | Skor1      | INSIDE                 | 0.140                                           | 1.471                            | 2598.37             | 3822.72             | 0.205                            | 1699.93             | 349.32              |
| A_68_P26574110 | chr9:62993652-62993696                            | NM_172446:1113     | Skor1      | INSIDE                 | 0.157                                           | 0.575                            | 1920.92             | 1104.72             | 0.090                            | 1307.67             | 117.97              |
| A_68_P31844546 | chr18:77098668-77098712                           | NM_001109743:3547  | Skor2      | INSIDE                 | 0.441                                           | 0.418                            | 1625.46             | 679.48              | 0.185                            | 1476.19             | 272.42              |
| A_68_P27798062 | chr11:52045287-52045331                           | NM_011543:-188     | Skp1a      | PROMOTER               | 0.552                                           | 0.536                            | 1812.67             | 971.02              | 0.296                            | 1514.98             | 448.31              |
| A_68_P25989169 | chr8:81033142-81033186                            | NM_029736:-69      | Slc10a7    | DIVERGENT_PROMOTER     | 0.156                                           | 0.647                            | 2714.74             | 1756.46             | 0.101                            | 2096.02             | 211.97              |
| A_68_P25989172 | chr8:81033404-81033456                            | NM_029736:197      | Slc10a7    | INSIDE                 | 0.067                                           | 1.382                            | 3021.95             | 4175.13             | 0.093                            | 2170.20             | 202.18              |
| A_68_P30485728 | chr15:100253426-100253470                         | NM_008732:38       | Slc11a2    | INSIDE                 | 0.625                                           | 0.409                            | 2542.12             | 1039.85             | 0.256                            | 2195.62             | 561.25              |
| A_68_P30485731 | chr15:100253716-100253768                         | NM_008732:-256     | Slc11a2    | PROMOTER               | 0.496                                           | 0.653                            | 1447.85             | 944.76              | 0.324                            | 1067.65             | 345.79              |
| A_68_P30485733 | chr15:100253963-100254009                         | NM_008732:-500     | Slc11a2    | PROMOTER               | 0.178                                           | 0.606                            | 2749.82             | 1665.72             | 0.108                            | 2146.70             | 231.20              |
| A_68_P21820737 | chr2:164786214-164786258                          | NM_020333:-7251    | Slc12a5    | PROMOTER               | 0.454                                           | 0.449                            | 1368.56             | 615.03              | 0.204                            | 1130.89             | 230.65              |
| A_68_P29141940 | chr13:73901479-73901523                           | NM_011390:356      | Slc12a7    | INSIDE                 | 0.064                                           | 0.574                            | 4587.60             | 2633.57             | 0.037                            | 3231.45             | 118.90              |
| A_68_P27910560 | chr11:72080885-72080933                           | NM_001004148:-802  | Slc13a5    | PROMOTER               | 0.136                                           | 0.700                            | 1720.46             | 1203.84             | 0.095                            | 1331.47             | 126.50              |
| A_68_P24078667 | chr5:128097745-128097789                          | NM_133895:-4       | Slc15a4    | PROMOTER               | 0.234                                           | 0.396                            | 1600.03             | 634.00              | 0.093                            | 1259.71             | 117.05              |
| A_68_P22392363 | chr3:104442146-104442191                          | NM_009196:-422     | Slc16a1    | PROMOTER               | 0.275                                           | 0.374                            | 1638.66             | 613.26              | 0.103                            | 1156.77             | 119.10              |
| A_68_P22392368 | chr3:104442587-104442631                          | NM_009196:18       | Slc16a1    | INSIDE                 | 0.522                                           | 0.566                            | 1703.49             | 964.24              | 0.296                            | 1295.31             | 382.87              |
| A_68_P22392373 | chr3:104443206-104443250                          | NM_009196:638      | Slc16a1    | INSIDE                 | 0.249                                           | 0.452                            | 1320.86             | 596.50              | 0.112                            | 1091.23             | 122.48              |
| A_68_P27082611 | chr10:39861509-39861553                           | NM_001114332:530   | Slc16a10   | INSIDE                 | 0.294                                           | 0.612                            | 888.49              | 543.96              | 0.180                            | 686.30              | 123.72              |
| A_68_P27899473 | chr11:70028070-70028114                           | NM_153081:681      | Slc16a11   | INSIDE                 | 0.653                                           | 0.449                            | 1495.14             | 671.05              | 0.293                            | 1262.84             | 370.40              |
| A_68_P27899519 | chr11:70034182-70034226                           | NM_172371:292      | Slc16a13   | INSIDE                 | 0.287                                           | 0.677                            | 2138.90             | 1448.28             | 0.194                            | 1471.59             | 286.19              |
| A_68_P28187724 | chr11:120812178-120812222                         | NM_001038653:1820  | Slc16a3    | INSIDE                 | 0.282                                           | 0.610                            | 2676.51             | 1632.44             | 0.172                            | 1910.64             | 329.15              |
| A_68_P28187725 | chr11:120812339-120812383                         | NM_001038653:1980  | Slc16a3    | INSIDE                 | 0.586                                           | 0.481                            | 1844.74             | 887.19              | 0.282                            | 1489.49             | 419.73              |
| A_68_P28118784 | chr11:109333745-109333789                         | NM_134038:777      | Slc16a6    | INSIDE                 | 0.270                                           | 0.454                            | 1520.70             | 691.02              | 0.123                            | 1224.16             | 150.33              |
| A_68_P28118795 | chr11:109335066-109335110                         | NM_001029842:-178  | Slc16a6    | PROMOTER               | 0.494                                           | 0.603                            | 1130.37             | 681.16              | 0.298                            | 940.74              | 280.31              |
| A_68_P26660234 | chr9:78435451-78435495                            | NM_172773:362      | Slc17a5    | INSIDE                 | 0.173                                           | 0.605                            | 1398.56             | 846.38              | 0.105                            | 1128.57             | 118.50              |
| A_68_P25091604 | chr7:52431430-52431474                            | NM_182993:12162    | Slc17a7    | INSIDE                 | 0.094                                           | 2.939                            | 8630.71             | 25361.52            | 0.277                            | 4801.50             | 1331.85             |
| A_68_P32218217 | chr19:59335443-59335487                           | NM_172523:97       | Slc18a2    | INSIDE                 | 0.437                                           | 0.375                            | 1951.34             | 730.94              | 0.164                            | 1600.79             | 261.74              |
| A_68_P29517796 | chr14:33276471-33276515                           | NM_021712:1544     | Slc18a3    | INSIDE                 | 0.312                                           | 0.704                            | 4136.47             | 2914.05             | 0.220                            | 2772.07             | 609.41              |
| A_68_P29517797 | chr14:33276567-33276611                           | NM_021712:1448     | Slc18a3    | INSIDE                 | 0.067                                           | 0.684                            | 4420.12             | 3025.44             | 0.046                            | 3068.08             | 140.23              |
| A_68_P29517799 | chr14:33276809-33276853                           | NM_021712:1206     | Slc18a3    | INSIDE                 | 0.330                                           | 0.644                            | 1387.88             | 893.81              | 0.212                            | 1161.94             | 246.74              |
| A_68_P20788006 | chr1:166178784-166178828                          | NM_054087:-379     | Slc19a2    | PROMOTER               | 0.267                                           | 0.630                            | 1163.80             | 733.02              | 0.168                            | 891.55              | 150.13              |
| A_68_P20788007 | chr1:166178862-166178906                          | NM_054087:-301     | Slc19a2    | PROMOTER               | 0.229                                           | 0.623                            | 2213.34             | 1379.14             | 0.143                            | 1587.80             | 227.00              |
| A_68_P20788009 | chr1:166179184-166179228                          | NM_054087:21       | Slc19a2    | INSIDE                 | 0.282                                           | 0.531                            | 3660.11             | 1942.01             | 0.150                            | 2936.10             | 439.37              |
| A_68_P32049530 | chr19:28909696-28909740                           | NM_009199:63       | Slc1a1     | INSIDE                 | 0.223                                           | 0.399                            | 2660.52             | 1061.46             | 0.089                            | 1677.45             | 149.03              |

| ProbeName      | Target position of probe on CpG island microarray | TargetID           | GeneSymbol | CpG island Description | Ratio of relative methylation (TiO2-NP/Vehicle) | Sham group                       |                     |                     | TiO <sub>2</sub> -H group        |                     |                     |
|----------------|---------------------------------------------------|--------------------|------------|------------------------|-------------------------------------------------|----------------------------------|---------------------|---------------------|----------------------------------|---------------------|---------------------|
|                |                                                   |                    |            |                        |                                                 | Relative methylation (Cy-5/Cy-3) | Cy-3 signal (Input) | Cy-5 signal (MeDIP) | Relative methylation (Cy-5/Cy-3) | Cy-3 signal (Input) | Cy-5 signal (MeDIP) |
| A_68_P21478263 | chr2:102499439-102499483                          | NM_001077514:621   | Slc1a2     | INSIDE                 | 0.349                                           | 0.426                            | 1244.38             | 530.24              | 0.149                            | 1051.03             | 156.14              |
| A_68_P30001154 | chr15:8586390-8586434                             | NM_148938:74395    | Slc1a3     | INSIDE                 | 0.520                                           | 4.194                            | 624.39              | 2618.46             | 2.182                            | 622.94              | 1359.41             |
| A_68_P27630977 | chr11:20232784-20232830                           | NM_018861:-90      | Slc1a4     | PROMOTER               | 0.374                                           | 0.620                            | 1423.10             | 882.05              | 0.232                            | 999.64              | 231.85              |
| A_68_P24983214 | chr7:17367558-17367602                            | NM_009201:886      | Slc1a5     | INSIDE                 | 0.580                                           | 0.568                            | 2163.86             | 1229.99             | 0.330                            | 1549.68             | 511.26              |
| A_68_P21623514 | chr2:129024077-129024121                          | NM_001159593:-410  | Slc20a1    | PROMOTER               | 0.504                                           | 0.576                            | 2595.13             | 1495.79             | 0.291                            | 1903.21             | 553.12              |
| A_68_P21623519 | chr2:129024601-129024645                          | NM_001159593:114   | Slc20a1    | INSIDE                 | 0.525                                           | 0.599                            | 2687.80             | 1610.63             | 0.314                            | 1991.40             | 625.96              |
| A_68_P27807567 | chr11:53793320-53793364                           | NM_019723:187      | Slc22a21   | INSIDE                 | 0.217                                           | 0.558                            | 1200.61             | 669.52              | 0.121                            | 1023.84             | 123.87              |
| A_68_P28938190 | chr13:34436028-34436072                           | NM_001033167:1001  | Slc22a23   | INSIDE                 | 0.256                                           | 0.619                            | 1229.32             | 761.07              | 0.158                            | 921.92              | 145.95              |
| A_68_P28938203 | chr13:34437339-34437383                           | NM_001033167:-309  | Slc22a23   | PROMOTER               | 0.235                                           | 0.671                            | 944.05              | 633.18              | 0.158                            | 787.18              | 124.33              |
| A_68_P27807843 | chr11:53841465-53841509                           | NM_019687:106      | Slc22a4    | INSIDE                 | 0.311                                           | 0.656                            | 1669.02             | 1095.08             | 0.204                            | 1261.63             | 257.68              |
| A_68_P28689579 | chr12:103367433-103367477                         | NM_172152:-174     | Slc24a4    | PROMOTER               | 0.227                                           | 0.522                            | 2343.86             | 1222.49             | 0.118                            | 1721.88             | 203.96              |
| A_68_P24039146 | chr5:120961225-120961269                          | NM_001177594:46    | Slc24a6    | INSIDE                 | 0.394                                           | 0.528                            | 3211.48             | 1697.21             | 0.208                            | 2575.83             | 536.78              |
| A_68_P24039147 | chr5:120961336-120961380                          | NM_001177594:158   | Slc24a6    | INSIDE                 | 0.319                                           | 0.473                            | 1197.17             | 566.24              | 0.151                            | 803.21              | 121.16              |
| A_68_P30576622 | chr16:17927537-17927581                           | NM_153150:754      | Slc25a1    | INSIDE                 | 0.448                                           | 0.688                            | 2021.54             | 1390.20             | 0.308                            | 1549.55             | 477.85              |
| A_68_P21319124 | chr2:71205525-71205575                            | NM_172436:61       | Slc25a12   | INSIDE                 | 0.334                                           | 0.604                            | 1138.58             | 688.07              | 0.202                            | 846.80              | 170.93              |
| A_68_P30377509 | chr15:81191134-81191178                           | NM_011399:39       | Slc25a17   | INSIDE                 | 0.116                                           | 0.650                            | 2295.39             | 1492.02             | 0.076                            | 1681.37             | 127.13              |
| A_68_P28154494 | chr11:115488974-115489018                         | NM_026071:457      | Slc25a19   | INSIDE                 | 0.433                                           | 0.633                            | 862.56              | 546.39              | 0.274                            | 711.16              | 195.15              |
| A_68_P28154497 | chr11:115489343-115489387                         | NM_026071:89       | Slc25a19   | INSIDE                 | 0.234                                           | 0.519                            | 2614.44             | 1356.14             | 0.122                            | 1961.26             | 238.46              |
| A_68_P25588799 | chr7:148623331-148623375                          | NM_001177576:-2859 | Slc25a22   | PROMOTER               | 0.639                                           | 0.564                            | 2863.01             | 1613.45             | 0.360                            | 2015.33             | 725.84              |
| A_68_P31259825 | chr17:57198936-57198980                           | NM_025877:328      | Slc25a23   | INSIDE                 | 0.554                                           | 0.488                            | 2654.48             | 1296.22             | 0.271                            | 2082.08             | 563.67              |
| A_68_P31259829 | chr17:57199355-57199400                           | NM_025877:-91      | Slc25a23   | DIVERGENT_PROMOTER     | 0.400                                           | 0.589                            | 2001.97             | 1180.00             | 0.236                            | 1472.23             | 347.15              |
| A_68_P24657050 | chr6:94450275-94450319                            | NM_026255:-11      | Slc25a26   | PROMOTER               | 0.148                                           | 0.659                            | 1733.51             | 1141.55             | 0.098                            | 1259.85             | 123.03              |
| A_68_P32127976 | chr19:43748957-43749001                           | NM_145156:393      | Slc25a28   | INSIDE                 | 0.169                                           | 0.510                            | 1858.26             | 947.25              | 0.086                            | 1352.81             | 116.60              |
| A_68_P32127987 | chr19:43750198-43750243                           | NM_145156:-849     | Slc25a28   | PROMOTER               | 0.155                                           | 0.696                            | 1895.01             | 1319.27             | 0.108                            | 1366.48             | 147.51              |
| A_68_P29729987 | chr14:76186477-76186521                           | NM_026232:346      | Slc25a30   | INSIDE                 | 0.221                                           | 0.461                            | 2324.93             | 1071.35             | 0.102                            | 1708.26             | 174.13              |
| A_68_P29729988 | chr14:76186558-76186602                           | NM_026232:264      | Slc25a30   | INSIDE                 | 0.601                                           | 0.525                            | 1223.05             | 642.53              | 0.316                            | 965.31              | 304.96              |
| A_68_P23402407 | chr4:149147586-149147630                          | NM_027460:768      | Slc25a33   | INSIDE                 | 0.614                                           | 0.586                            | 1141.88             | 668.64              | 0.360                            | 946.72              | 340.62              |
| A_68_P26750963 | chr9:97011708-97011752                            | NM_138756:-270     | Slc25a36   | PROMOTER               | 0.275                                           | 0.510                            | 1489.71             | 759.94              | 0.140                            | 1255.09             | 175.96              |
| A_68_P25834905 | chr8:47296158-47296202                            | NM_007450:183      | Slc25a4    | INSIDE                 | 0.427                                           | 0.363                            | 3243.34             | 1176.72             | 0.155                            | 2452.80             | 380.33              |
| A_68_P25950463 | chr8:72735887-72735931                            | NM_001007570:272   | Slc25a42   | INSIDE                 | 0.348                                           | 0.612                            | 1770.31             | 1082.71             | 0.213                            | 1267.46             | 269.44              |
| A_68_P25950467 | chr8:72736364-72736408                            | NM_001007570:-206  | Slc25a42   | PROMOTER               | 0.254                                           | 0.717                            | 2209.13             | 1583.69             | 0.182                            | 1728.52             | 314.58              |
| A_68_P25950469 | chr8:72736531-72736577                            | NM_001007570:-374  | Slc25a42   | PROMOTER               | 0.174                                           | 0.598                            | 1531.97             | 915.90              | 0.104                            | 1155.40             | 119.93              |
| A_68_P25950471 | chr8:72736718-72736765                            | NM_001007570:-561  | Slc25a42   | PROMOTER               | 0.359                                           | 0.590                            | 1101.61             | 650.02              | 0.212                            | 813.20              | 172.39              |
| A_68_P23973505 | chr5:109106557-109106601                          | NM_174870:-1910    | Slc26a1    | PROMOTER               | 0.052                                           | 1.822                            | 1939.53             | 3534.19             | 0.094                            | 1277.76             | 120.45              |
| A_68_P23973506 | chr5:109106670-109106714                          | NM_174870:-2024    | Slc26a1    | PROMOTER               | 0.270                                           | 1.498                            | 4716.65             | 7067.46             | 0.405                            | 2790.84             | 1130.22             |
| A_68_P28177384 | chr11:119217045-119217089                         | NM_178743:196      | Slc26a11   | INSIDE                 | 0.609                                           | 0.605                            | 1646.79             | 996.71              | 0.369                            | 1314.26             | 484.36              |
| A_68_P28332015 | chr12:32244658-32244702                           | NM_011867:154      | Slc26a4    | INSIDE                 | 0.275                                           | 0.575                            | 1918.56             | 1103.79             | 0.158                            | 1386.50             | 219.63              |
| A_68_P25957539 | chr8:74093493-74093537                            | NM_011977:689      | Slc27a1    | INSIDE                 | 0.263                                           | 0.656                            | 965.00              | 633.10              | 0.173                            | 689.33              | 118.92              |
| A_68_P25957540 | chr8:74093690-74093734                            | NM_011977:887      | Slc27a1    | INSIDE                 | 0.450                                           | 0.570                            | 1188.11             | 677.45              | 0.257                            | 973.27              | 249.67              |
| A_68_P25957549 | chr8:74094641-74094686                            | NM_011977:1838     | Slc27a1    | INSIDE                 | 0.449                                           | 0.487                            | 1901.62             | 925.32              | 0.218                            | 1411.90             | 308.25              |
| A_68_P21608668 | chr2:126379204-126379249                          | NM_011978:467      | Slc27a2    | INSIDE                 | 0.399                                           | 0.514                            | 2438.81             | 1252.84             | 0.205                            | 1823.73             | 373.99              |
| A_68_P21608669 | chr2:126379290-126379337                          | NM_011978:554      | Slc27a2    | INSIDE                 | 0.174                                           | 0.554                            | 1744.95             | 967.04              | 0.096                            | 1200.39             | 115.56              |
| A_68_P21099540 | chr2:29658503-29658547                            | NM_011989:325      | Slc27a4    | INSIDE                 | 0.589                                           | 0.635                            | 2505.89             | 1590.11             | 0.374                            | 2038.73             | 761.84              |
| A_68_P31926382 | chr19:5023935-5023979                             | NM_007854:-49      | Slc29a2    | PROMOTER               | 0.312                                           | 0.617                            | 2154.83             | 1330.51             | 0.193                            | 1509.83             | 290.69              |

| ProbeName      | Target position of probe on CpG island microarray | TargetID          | GeneSymbol | CpG island Description | Ratio of relative methylation (TiO2-NP/Vehicle) | Sham group                       |                     |                     | TiO <sub>2</sub> -H group        |                     |                     |
|----------------|---------------------------------------------------|-------------------|------------|------------------------|-------------------------------------------------|----------------------------------|---------------------|---------------------|----------------------------------|---------------------|---------------------|
|                |                                                   |                   |            |                        |                                                 | Relative methylation (Cy-5/Cy-3) | Cy-3 signal (Input) | Cy-5 signal (MeDIP) | Relative methylation (Cy-5/Cy-3) | Cy-3 signal (Input) | Cy-5 signal (MeDIP) |
| A_68_P31926383 | chr19:5024065-5024109                             | NM_007854:81      | Slc29a2    | INSIDE                 | 0.208                                           | 0.736                            | 4823.55             | 3549.49             | 0.153                            | 3181.33             | 487.98              |
| A_68_P31926384 | chr19:5024260-5024304                             | NM_007854:277     | Slc29a2    | INSIDE                 | 0.594                                           | 0.524                            | 1656.91             | 868.73              | 0.312                            | 1423.90             | 443.74              |
| A_68_P31926386 | chr19:5024497-5024541                             | NM_007854:513     | Slc29a2    | INSIDE                 | 0.251                                           | 0.647                            | 910.24              | 589.06              | 0.162                            | 715.85              | 116.11              |
| A_68_P27176491 | chr10:60215496-60215540                           | NM_023596:12      | Slc29a3    | INSIDE                 | 0.319                                           | 0.461                            | 4027.72             | 1857.59             | 0.147                            | 2857.79             | 420.10              |
| A_68_P27176493 | chr10:60215697-60215744                           | NM_023596:-190    | Slc29a3    | PROMOTER               | 0.232                                           | 0.573                            | 1256.27             | 719.52              | 0.133                            | 891.49              | 118.71              |
| A_68_P24152941 | chr5:143177960-143178004                          | NM_146257:-72     | Slc29a4    | PROMOTER               | 0.658                                           | 2.270                            | 11641.00            | 26427.90            | 1.495                            | 7524.11             | 11247.90            |
| A_68_P23243656 | chr4:118781563-118781607                          | NM_011400:235     | Slc2a1     | INSIDE                 | 0.613                                           | 0.601                            | 1382.72             | 830.48              | 0.368                            | 1175.39             | 432.70              |
| A_68_P21824257 | chr2:165329532-165329576                          | NM_130451:77      | Slc2a10    | INSIDE                 | 0.365                                           | 0.542                            | 1306.20             | 707.64              | 0.198                            | 1231.11             | 243.71              |
| A_68_P26998899 | chr10:22365156-22365200                           | NM_178934:362     | Slc2a12    | INSIDE                 | 0.323                                           | 0.737                            | 2954.87             | 2176.30             | 0.238                            | 2393.14             | 568.74              |
| A_68_P26998900 | chr10:22365258-22365302                           | NM_178934:464     | Slc2a12    | INSIDE                 | 0.216                                           | 0.713                            | 3308.36             | 2358.11             | 0.154                            | 2497.69             | 384.56              |
| A_68_P30436281 | chr15:91402869-91402913                           | NM_001033633:802  | Slc2a13    | INSIDE                 | 0.185                                           | 0.441                            | 1931.15             | 851.47              | 0.081                            | 1457.54             | 118.77              |
| A_68_P20901342 | chr1:187278951-187278995                          | NM_001033286:246  | Slc30a10   | INSIDE                 | 0.435                                           | 0.414                            | 1573.57             | 650.90              | 0.180                            | 1299.23             | 233.87              |
| A_68_P23322291 | chr4:133899284-133899328                          | NM_001039677:322  | Slc30a2    | INSIDE                 | 0.319                                           | 0.547                            | 1470.19             | 804.25              | 0.174                            | 1230.34             | 214.66              |
| A_68_P23576445 | chr5:31395426-31395470                            | NM_011773:452     | Slc30a3    | INSIDE                 | 0.266                                           | 0.622                            | 5256.90             | 3269.71             | 0.165                            | 3941.63             | 652.25              |
| A_68_P23576446 | chr5:31395554-31395598                            | NM_011773:324     | Slc30a3    | INSIDE                 | 0.239                                           | 0.588                            | 2122.58             | 1248.39             | 0.140                            | 1595.07             | 224.02              |
| A_68_P23576450 | chr5:31396001-31396045                            | NM_011773:-122    | Slc30a3    | PROMOTER               | 0.288                                           | 1.336                            | 4328.71             | 5783.69             | 0.384                            | 2888.85             | 1109.73             |
| A_68_P23576461 | chr5:31397375-31397419                            | NM_011773:-1496   | Slc30a3    | PROMOTER               | 0.151                                           | 0.674                            | 1658.04             | 1117.04             | 0.102                            | 1144.17             | 116.34              |
| A_68_P31351306 | chr17:74795028-74795072                           | NM_144798:79      | Slc30a6    | INSIDE                 | 0.289                                           | 0.614                            | 1014.56             | 622.62              | 0.177                            | 846.16              | 150.14              |
| A_68_P22446821 | chr3:115710285-115710329                          | NM_023214:18      | Slc30a7    | INSIDE                 | 0.552                                           | 0.621                            | 1370.18             | 850.22              | 0.342                            | 1049.51             | 359.32              |
| A_68_P23767118 | chr5:67698039-67698083                            | NM_178651:-135    | Slc30a9    | PROMOTER               | 0.306                                           | 0.696                            | 2507.38             | 1744.43             | 0.213                            | 1754.00             | 372.85              |
| A_68_P22963968 | chr4:62021675-62021719                            | NM_175090:-38     | Slc31a1    | DIVERGENT_PROMOTER     | 0.275                                           | 0.486                            | 2719.08             | 1322.52             | 0.134                            | 1958.93             | 262.22              |
| A_68_P21783924 | chr2:158436419-158436463                          | NM_009508:-53     | Slc32a1    | PROMOTER               | 0.224                                           | 0.451                            | 2642.45             | 1192.06             | 0.101                            | 2041.59             | 205.90              |
| A_68_P21783925 | chr2:158436516-158436560                          | NM_009508:45      | Slc32a1    | INSIDE                 | 0.253                                           | 0.622                            | 2370.41             | 1474.89             | 0.158                            | 1913.02             | 301.52              |
| A_68_P21783932 | chr2:158437350-158437394                          | NM_009508:879     | Slc32a1    | INSIDE                 | 0.094                                           | 0.748                            | 6245.23             | 4670.35             | 0.071                            | 4035.16             | 285.01              |
| A_68_P21783953 | chr2:158439712-158439756                          | NM_009508:3241    | Slc32a1    | INSIDE                 | 0.153                                           | 0.524                            | 4106.70             | 2153.66             | 0.080                            | 2916.93             | 233.58              |
| A_68_P21783954 | chr2:158439815-158439861                          | NM_009508:3345    | Slc32a1    | INSIDE                 | 0.106                                           | 0.599                            | 2771.22             | 1658.63             | 0.063                            | 1913.30             | 121.06              |
| A_68_P21783955 | chr2:158439931-158439975                          | NM_009508:3459    | Slc32a1    | INSIDE                 | 0.144                                           | 0.708                            | 1510.80             | 1068.98             | 0.102                            | 1160.61             | 118.27              |
| A_68_P21783956 | chr2:158440051-158440100                          | NM_009508:3582    | Slc32a1    | INSIDE                 | 0.313                                           | 0.568                            | 940.57              | 534.46              | 0.178                            | 693.97              | 123.49              |
| A_68_P23698174 | chr5:53440423-53440467                            | NM_011402:-147    | Slc34a2    | PROMOTER               | 0.238                                           | 0.704                            | 1995.35             | 1404.58             | 0.167                            | 1649.27             | 276.23              |
| A_68_P32240689 | chrX:7461201-7461245                              | NM_001083937:-147 | Slc35a2    | PROMOTER               | 0.131                                           | 2.395                            | 2067.91             | 4953.34             | 0.314                            | 730.87              | 229.37              |
| A_68_P32240693 | chrX:7461619-7461664                              | NM_001083937:272  | Slc35a2    | INSIDE                 | 0.267                                           | 1.363                            | 1457.12             | 1985.99             | 0.365                            | 620.73              | 226.31              |
| A_68_P32240694 | chrX:7461707-7461754                              | NM_001083937:361  | Slc35a2    | INSIDE                 | 0.047                                           | 2.503                            | 2768.65             | 6928.78             | 0.116                            | 1019.91             | 118.76              |
| A_68_P22450818 | chr3:116414578-116414622                          | NM_144902:598     | Slc35a3    | INSIDE                 | 0.337                                           | 0.498                            | 2384.90             | 1187.78             | 0.168                            | 1934.40             | 324.78              |
| A_68_P30725222 | chr16:45158683-45158727                           | NM_028756:82      | Slc35a5    | INSIDE                 | 0.648                                           | 0.611                            | 843.81              | 515.92              | 0.396                            | 757.76              | 300.05              |
| A_68_P28038461 | chr11:95245810-95245864                           | NM_016752:-399    | Slc35b1    | PROMOTER               | 0.241                                           | 0.677                            | 948.26              | 642.06              | 0.163                            | 735.47              | 120.24              |
| A_68_P28963695 | chr13:39052121-39052165                           | NM_001170430:264  | Slc35b3    | INSIDE                 | 0.206                                           | 0.352                            | 2444.68             | 861.62              | 0.073                            | 1875.39             | 136.47              |
| A_68_P28963696 | chr13:39052204-39052248                           | NM_001170430:180  | Slc35b3    | INSIDE                 | 0.211                                           | 0.424                            | 2156.19             | 914.27              | 0.089                            | 1634.57             | 146.09              |
| A_68_P28963699 | chr13:39052582-39052626                           | NM_001170430:-198 | Slc35b3    | PROMOTER               | 0.363                                           | 0.673                            | 1247.85             | 839.95              | 0.244                            | 981.07              | 239.84              |
| A_68_P23165023 | chr4:102888044-102888088                          | NM_177732:-577    | Slc35d1    | PROMOTER               | 0.651                                           | 0.694                            | 1415.28             | 982.17              | 0.452                            | 1125.28             | 508.43              |
| A_68_P26983365 | chr10:19569569-19569613                           | NM_029529:1675    | Slc35d3    | INSIDE                 | 0.588                                           | 0.572                            | 1545.29             | 883.45              | 0.336                            | 1185.10             | 398.63              |
| A_68_P26983369 | chr10:19569958-19570002                           | NM_029529:1285    | Slc35d3    | INSIDE                 | 0.492                                           | 0.503                            | 1367.23             | 688.20              | 0.248                            | 1009.08             | 249.76              |
| A_68_P26983375 | chr10:19570710-19570754                           | NM_029529:533     | Slc35d3    | INSIDE                 | 0.245                                           | 0.632                            | 2887.57             | 1824.08             | 0.155                            | 2183.68             | 338.17              |
| A_68_P26983378 | chr10:19571100-19571144                           | NM_029529:143     | Slc35d3    | INSIDE                 | 0.096                                           | 0.615                            | 2845.12             | 1750.59             | 0.059                            | 2155.76             | 127.27              |
| A_68_P25961696 | chr8:75015878-75015926                            | NM_177766:611     | Slc35e1    | INSIDE                 | 0.261                                           | 0.406                            | 1478.90             | 600.55              | 0.106                            | 1216.53             | 128.73              |

| ProbeName      | Target position of probe on CpG island microarray | TargetID           | GeneSymbol | CpG island Description | Ratio of relative methylation (TiO2-NP/Vehicle) | Sham group                       |                     |                     | TiO <sub>2</sub> -H group        |                     |                     |
|----------------|---------------------------------------------------|--------------------|------------|------------------------|-------------------------------------------------|----------------------------------|---------------------|---------------------|----------------------------------|---------------------|---------------------|
|                |                                                   |                    |            |                        |                                                 | Relative methylation (Cy-5/Cy-3) | Cy-3 signal (Input) | Cy-5 signal (MeDIP) | Relative methylation (Cy-5/Cy-3) | Cy-3 signal (Input) | Cy-5 signal (MeDIP) |
| A_68_P25961699 | chr8:75016300-75016344                            | NM_177766:191      | Slc35e1    | INSIDE                 | 0.258                                           | 0.351                            | 1716.66             | 603.10              | 0.091                            | 1381.07             | 125.22              |
| A_68_P23439556 | chr4:154976380-154976427                          | NM_177186:879      | Slc35e2    | INSIDE                 | 0.217                                           | 0.497                            | 1428.41             | 710.37              | 0.108                            | 1090.57             | 117.81              |
| A_68_P27554681 | chr11:3813626-3813670                             | NM_153142:1019     | Slc35e4    | INSIDE                 | 0.179                                           | 0.665                            | 1359.73             | 904.61              | 0.119                            | 1012.87             | 120.44              |
| A_68_P27138497 | chr10:52410862-52410906                           | NM_178675:578      | Slc35f1    | INSIDE                 | 0.317                                           | 0.561                            | 1223.00             | 686.52              | 0.178                            | 1010.72             | 179.68              |
| A_68_P27138498 | chr10:52410952-52410996                           | NM_178675:668      | Slc35f1    | INSIDE                 | 0.510                                           | 0.542                            | 982.61              | 532.30              | 0.277                            | 855.59              | 236.59              |
| A_68_P26522400 | chr9:53619652-53619696                            | NM_028060:333      | Slc35f2    | INSIDE                 | 0.578                                           | 0.536                            | 1415.28             | 758.62              | 0.310                            | 1195.29             | 370.62              |
| A_68_P26256736 | chr8:128822425-128822469                          | NM_175434:-32      | Slc35f3    | PROMOTER               | 0.357                                           | 0.573                            | 3684.64             | 2113.05             | 0.205                            | 2919.91             | 597.22              |
| A_68_P20585378 | chr1:127457195-127457239                          | NM_028787:-376     | Slc35f5    | PROMOTER               | 0.398                                           | 0.549                            | 1232.48             | 677.04              | 0.218                            | 1037.55             | 226.65              |
| A_68_P20585379 | chr1:127457276-127457320                          | NM_028787:-294     | Slc35f5    | PROMOTER               | 0.273                                           | 0.655                            | 826.55              | 541.37              | 0.179                            | 704.50              | 125.89              |
| A_68_P20585380 | chr1:127457355-127457399                          | NM_028787:-216     | Slc35f5    | PROMOTER               | 0.606                                           | 0.427                            | 1335.57             | 570.20              | 0.259                            | 1127.49             | 291.80              |
| A_68_P31138852 | chr17:31433001-31433045                           | NM_153062:595      | Slc37a1    | INSIDE                 | 0.259                                           | 0.647                            | 1554.79             | 1006.32             | 0.167                            | 1278.81             | 214.11              |
| A_68_P31138855 | chr17:31433416-31433460                           | NM_153062:1011     | Slc37a1    | INSIDE                 | 0.260                                           | 0.535                            | 1291.17             | 690.63              | 0.139                            | 864.92              | 120.08              |
| A_68_P26467387 | chr9:44205049-44205093                            | NM_008063:-1188    | Slc37a4    | PROMOTER               | 0.391                                           | 0.721                            | 1626.23             | 1172.93             | 0.282                            | 1467.19             | 414.12              |
| A_68_P30464705 | chr15:96471903-96471947                           | NM_134086:469      | Slc38a1    | INSIDE                 | 0.379                                           | 0.501                            | 1147.95             | 575.10              | 0.190                            | 897.07              | 170.44              |
| A_68_P30464706 | chr15:96472084-96472128                           | NM_134086:287      | Slc38a1    | INSIDE                 | 0.643                                           | 0.621                            | 1270.19             | 788.24              | 0.399                            | 996.93              | 397.86              |
| A_68_P30465070 | chr15:96529072-96529122                           | NM_175121:1033     | Slc38a2    | INSIDE                 | 0.346                                           | 0.434                            | 1176.92             | 510.40              | 0.150                            | 921.32              | 138.35              |
| A_68_P30465139 | chr15:96539817-96539861                           | NM_175121:-9709    | Slc38a2    | PROMOTER               | 0.233                                           | 0.578                            | 1594.16             | 920.82              | 0.135                            | 1284.27             | 173.18              |
| A_68_P22324142 | chr3:90052208-90052252                            | NM_013901:117      | Slc39a1    | INSIDE                 | 0.438                                           | 0.508                            | 1286.91             | 654.27              | 0.223                            | 1118.40             | 248.91              |
| A_68_P21420492 | chr2:90910618-90910662                            | NM_026721:-262     | Slc39a13   | PROMOTER               | 0.123                                           | 0.611                            | 2065.79             | 1262.26             | 0.075                            | 1559.32             | 117.02              |
| A_68_P29700849 | chr14:70750941-70750985                           | NM_001135152:-2722 | Slc39a14   | PROMOTER               | 0.457                                           | 0.737                            | 2377.00             | 1752.80             | 0.337                            | 1666.45             | 561.36              |
| A_68_P31151612 | chr17:34168426-34168470                           | NM_001077709:187   | Slc39a7    | INSIDE                 | 0.282                                           | 0.441                            | 1242.25             | 547.48              | 0.124                            | 937.67              | 116.51              |
| A_68_P31151613 | chr17:34168502-34168546                           | NM_001077709:111   | Slc39a7    | INSIDE                 | 0.548                                           | 0.588                            | 1203.11             | 706.85              | 0.322                            | 898.48              | 289.29              |
| A_68_P31943153 | chr19:8787770-8787814                             | NM_008577:595      | Slc3a2     | INSIDE                 | 0.534                                           | 0.676                            | 1585.38             | 1072.11             | 0.361                            | 1172.38             | 423.18              |
| A_68_P31943156 | chr19:8788183-8788228                             | NM_008577:182      | Slc3a2     | INSIDE                 | 0.300                                           | 0.649                            | 1373.09             | 891.78              | 0.195                            | 937.37              | 182.55              |
| A_68_P31943157 | chr19:8788272-8788316                             | NM_008577:93       | Slc3a2     | INSIDE                 | 0.176                                           | 0.613                            | 1539.03             | 943.38              | 0.108                            | 1082.47             | 116.78              |
| A_68_P20617850 | chr1:133724396-133724440                          | NM_173865:-170     | Slc41a1    | PROMOTER               | 0.143                                           | 0.648                            | 3597.66             | 2331.67             | 0.093                            | 2661.22             | 247.15              |
| A_68_P21394884 | chr2:84679887-84679931                            | NM_024497:-571     | Slc43a1    | PROMOTER               | 0.267                                           | 0.395                            | 1482.17             | 585.71              | 0.105                            | 1143.40             | 120.42              |
| A_68_P21395065 | chr2:84706336-84706380                            | NM_001083809:25576 | Slc43a1    | DOWNSTREAM             | 0.180                                           | 0.526                            | 3371.98             | 1774.51             | 0.095                            | 2424.73             | 229.96              |
| A_68_P21395068 | chr2:84706724-84706775                            | NM_001083809:25967 | Slc43a1    | DOWNSTREAM             | 0.114                                           | 0.673                            | 2322.84             | 1563.25             | 0.077                            | 1539.46             | 117.95              |
| A_68_P27926646 | chr11:75344654-75344698                           | NM_001199284:-519  | Slc43a2    | PROMOTER               | 0.240                                           | 0.383                            | 1726.94             | 661.76              | 0.092                            | 1306.77             | 120.23              |
| A_68_P27926647 | chr11:75344750-75344794                           | NM_001199284:-423  | Slc43a2    | PROMOTER               | 0.212                                           | 0.614                            | 3844.62             | 2361.91             | 0.130                            | 2777.15             | 361.76              |
| A_68_P27926653 | chr11:75345380-75345424                           | NM_001199283:-211  | Slc43a2    | PROMOTER               | 0.417                                           | 0.433                            | 3188.26             | 1381.53             | 0.181                            | 2533.47             | 457.61              |
| A_68_P22659972 | chr3:153636247-153636291                          | NM_001081263:-131  | Slc44a5    | PROMOTER               | 0.609                                           | 0.592                            | 962.49              | 569.93              | 0.361                            | 806.88              | 291.12              |
| A_68_P22659976 | chr3:153636770-153636814                          | NM_001081263:393   | Slc44a5    | INSIDE                 | 0.523                                           | 0.537                            | 1862.95             | 1001.08             | 0.281                            | 1449.80             | 407.80              |
| A_68_P20618601 | chr1:133860103-133860147                          | NM_145977:-7061    | Slc45a3    | PROMOTER               | 0.252                                           | 0.605                            | 1023.46             | 619.57              | 0.152                            | 844.77              | 128.65              |
| A_68_P27943491 | chr11:78279298-78279342                           | NM_026740:118      | Slc46a1    | INSIDE                 | 0.388                                           | 0.632                            | 956.21              | 604.78              | 0.245                            | 777.95              | 190.79              |
| A_68_P27943493 | chr11:78279470-78279514                           | NM_026740:290      | Slc46a1    | INSIDE                 | 0.369                                           | 0.544                            | 1583.58             | 861.37              | 0.201                            | 1242.60             | 249.24              |
| A_68_P24176374 | chr5:148706152-148706196                          | NM_027872:204      | Slc46a3    | INSIDE                 | 0.621                                           | 0.561                            | 1055.09             | 592.00              | 0.349                            | 888.81              | 309.76              |
| A_68_P27848102 | chr11:61191658-61191702                           | NM_026183:-103     | Slc47a1    | PROMOTER               | 0.507                                           | 1.406                            | 3890.51             | 5468.60             | 0.713                            | 3248.35             | 2315.81             |
| A_68_P21631237 | chr2:130522606-130522650                          | NM_001081162:627   | Slc4a11    | INSIDE                 | 0.158                                           | 0.616                            | 2096.96             | 1291.76             | 0.098                            | 1671.59             | 163.02              |
| A_68_P23541735 | chr5:23931232-23931276                            | NM_009207:205      | Slc4a2     | INSIDE                 | 0.502                                           | 0.591                            | 1220.94             | 721.48              | 0.297                            | 1048.39             | 311.24              |
| A_68_P20354817 | chr1:75543227-75543271                            | NM_009208:408      | Slc4a3     | INSIDE                 | 0.430                                           | 0.555                            | 4935.41             | 2738.41             | 0.239                            | 3596.93             | 858.77              |
| A_68_P29421302 | chr14:15535329-15535377                           | NM_001033270:-186  | Slc4a7     | PROMOTER               | 0.349                                           | 0.445                            | 1301.27             | 579.43              | 0.156                            | 976.97              | 151.93              |
| A_68_P23576135 | chr5:31350810-31350854                            | NM_177870:-380     | Slc5a6     | PROMOTER               | 0.473                                           | 0.577                            | 1275.52             | 735.41              | 0.273                            | 903.48              | 246.57              |

| ProbeName      | Target position of probe on CpG island microarray | TargetID           | GeneSymbol | CpG island Description | Ratio of relative methylation (TiO2-NP/Vehicle) | Sham group                       |                     |                     | TiO <sub>2</sub> -H group        |                     |                     |
|----------------|---------------------------------------------------|--------------------|------------|------------------------|-------------------------------------------------|----------------------------------|---------------------|---------------------|----------------------------------|---------------------|---------------------|
|                |                                                   |                    |            |                        |                                                 | Relative methylation (Cy-5/Cy-3) | Cy-3 signal (Input) | Cy-5 signal (MeDIP) | Relative methylation (Cy-5/Cy-3) | Cy-3 signal (Input) | Cy-5 signal (MeDIP) |
| A_68_P31247136 | chr17:54437767-54437811                           | NM_022025:571      | Slc5a7     | INSIDE                 | 0.522                                           | 0.671                            | 1318.86             | 885.17              | 0.351                            | 1023.01             | 358.71              |
| A_68_P31247137 | chr17:54437878-54437922                           | NM_022025:459      | Slc5a7     | INSIDE                 | 0.206                                           | 0.676                            | 1031.82             | 697.71              | 0.139                            | 837.54              | 116.66              |
| A_68_P31247139 | chr17:54438039-54438089                           | NM_022025:295      | Slc5a7     | INSIDE                 | 0.064                                           | 0.690                            | 3657.85             | 2522.83             | 0.044                            | 2637.98             | 116.63              |
| A_68_P27327919 | chr10:88349039-88349083                           | NM_145423:324      | Slc5a8     | INSIDE                 | 0.109                                           | 0.716                            | 4081.81             | 2921.07             | 0.078                            | 3003.97             | 234.05              |
| A_68_P27327920 | chr10:88349166-88349210                           | NM_145423:452      | Slc5a8     | INSIDE                 | 0.643                                           | 0.410                            | 1537.83             | 630.03              | 0.263                            | 1071.91             | 282.16              |
| A_68_P27327921 | chr10:88349290-88349347                           | NM_145423:582      | Slc5a8     | INSIDE                 | 0.223                                           | 0.641                            | 1035.31             | 663.66              | 0.143                            | 815.56              | 116.52              |
| A_68_P24764866 | chr6:114232993-114233037                          | NM_178703:386      | Slc6a1     | INSIDE                 | 0.471                                           | 0.533                            | 1506.24             | 803.05              | 0.251                            | 1206.57             | 302.85              |
| A_68_P24763849 | chr6:114081414-114081459                          | NM_172890:202      | Slc6a11    | INSIDE                 | 0.268                                           | 0.444                            | 2197.67             | 974.80              | 0.119                            | 1641.03             | 195.42              |
| A_68_P24763851 | chr6:114081597-114081641                          | NM_172890:384      | Slc6a11    | INSIDE                 | 0.607                                           | 0.648                            | 1224.23             | 793.89              | 0.394                            | 1041.94             | 410.18              |
| A_68_P26896298 | chr9:123587851-123587896                          | NM_139142:77       | Slc6a20a   | INSIDE                 | 0.668                                           | 0.415                            | 3054.71             | 1267.00             | 0.277                            | 2432.20             | 673.39              |
| A_68_P25115500 | chr7:57167143-57167187                            | NM_148931:95       | Slc6a5     | INSIDE                 | 0.618                                           | 0.599                            | 1270.30             | 760.81              | 0.370                            | 959.40              | 355.32              |
| A_68_P31755042 | chr18:61173520-61173564                           | NM_201353:311      | Slc6a7     | INSIDE                 | 0.196                                           | 0.528                            | 1881.91             | 994.11              | 0.103                            | 1465.17             | 151.44              |
| A_68_P32464060 | chrX:70918500-70918544                            | NM_001142809:51    | Slc6a8     | INSIDE                 | 0.242                                           | 1.628                            | 1115.81             | 1816.54             | 0.394                            | 465.66              | 183.51              |
| A_68_P23236660 | chr4:117508118-117508162                          | NM_008135:278      | Slc6a9     | INSIDE                 | 0.123                                           | 1.455                            | 3112.36             | 4528.70             | 0.179                            | 2055.57             | 367.46              |
| A_68_P23236661 | chr4:117508209-117508255                          | NM_008135:370      | Slc6a9     | INSIDE                 | 0.022                                           | 3.433                            | 4780.88             | 16413.51            | 0.077                            | 3061.80             | 235.89              |
| A_68_P23236666 | chr4:117508743-117508787                          | NM_008135:902      | Slc6a9     | INSIDE                 | 0.208                                           | 1.603                            | 1739.84             | 2789.62             | 0.333                            | 1369.60             | 455.94              |
| A_68_P24179198 | chr5:149211250-149211294                          | NM_007513:208      | Slc7a1     | INSIDE                 | 0.098                                           | 0.678                            | 2631.10             | 1784.16             | 0.066                            | 1868.57             | 124.19              |
| A_68_P22032968 | chr3:31208905-31208949                            | NM_172861:315      | Slc7a14    | INSIDE                 | 0.238                                           | 0.438                            | 1510.22             | 661.38              | 0.104                            | 1201.77             | 125.33              |
| A_68_P30574557 | chr16:17576828-17576872                           | NM_144852:-86      | Slc7a4     | PROMOTER               | 0.455                                           | 0.647                            | 1637.39             | 1060.01             | 0.295                            | 1311.48             | 386.28              |
| A_68_P26229668 | chr8:124430812-124430856                          | NM_011404:752      | Slc7a5     | INSIDE                 | 0.229                                           | 0.475                            | 2550.79             | 1211.51             | 0.109                            | 1869.54             | 203.48              |
| A_68_P26229670 | chr8:124431063-124431107                          | NM_011404:502      | Slc7a5     | INSIDE                 | 0.584                                           | 0.556                            | 1446.85             | 804.54              | 0.325                            | 967.08              | 314.19              |
| A_68_P26229672 | chr8:124431324-124431368                          | NM_011404:240      | Slc7a5     | INSIDE                 | 0.243                                           | 0.312                            | 2401.66             | 749.30              | 0.076                            | 1603.84             | 121.68              |
| A_68_P28580849 | chr12:82433588-82433632                           | NM_001167920:557   | Slc8a3     | INSIDE                 | 0.615                                           | 0.666                            | 997.56              | 663.93              | 0.410                            | 772.99              | 316.54              |
| A_68_P23317226 | chr4:132925776-132925820                          | NM_016981:112      | Slc9a1     | INSIDE                 | 0.444                                           | 0.553                            | 2591.34             | 1434.14             | 0.246                            | 2238.00             | 549.81              |
| A_68_P29144761 | chr13:74304464-74304508                           | NM_001081060:45524 | Slc9a3     | DOWNSTREAM             | 0.641                                           | 0.647                            | 1075.95             | 695.72              | 0.415                            | 865.52              | 358.83              |
| A_68_P28151694 | chr11:115024434-115024480                         | NM_012030:-198     | Slc9a3r1   | PROMOTER               | 0.171                                           | 0.626                            | 1464.21             | 916.70              | 0.107                            | 1140.40             | 121.85              |
| A_68_P28151695 | chr11:115024532-115024576                         | NM_012030:-100     | Slc9a3r1   | PROMOTER               | 0.285                                           | 0.480                            | 1527.52             | 733.96              | 0.137                            | 1217.10             | 166.40              |
| A_68_P28151701 | chr11:115025012-115025056                         | NM_012030:380      | Slc9a3r1   | INSIDE                 | 0.252                                           | 0.379                            | 1605.23             | 608.54              | 0.095                            | 1196.98             | 114.20              |
| A_68_P21835385 | chr2:167247037-167247081                          | NM_148929:-162     | Slc9a8     | PROMOTER               | 0.484                                           | 0.664                            | 1773.84             | 1178.65             | 0.321                            | 1353.62             | 435.08              |
| A_68_P21835387 | chr2:167247383-167247427                          | NM_148929:184      | Slc9a8     | INSIDE                 | 0.127                                           | 0.351                            | 3404.37             | 1196.55             | 0.045                            | 2679.10             | 119.63              |
| A_68_P25235396 | chr7:81699348-81699401                            | NM_001038643:292   | Slco3a1    | INSIDE                 | 0.243                                           | 0.664                            | 1024.28             | 679.64              | 0.161                            | 769.19              | 124.14              |
| A_68_P20038592 | chr1:12981645-12981695                            | NM_172841:-454     | Slco5a1    | PROMOTER               | 0.462                                           | 0.568                            | 965.89              | 548.33              | 0.262                            | 832.08              | 218.07              |
| A_68_P20038594 | chr1:12981919-12981963                            | NM_172841:-724     | Slco5a1    | PROMOTER               | 0.391                                           | 0.619                            | 903.30              | 558.79              | 0.242                            | 770.40              | 186.25              |
| A_68_P20038597 | chr1:12982588-12982632                            | NM_172841:-1394    | Slco5a1    | PROMOTER               | 0.574                                           | 0.592                            | 1150.49             | 680.83              | 0.340                            | 942.04              | 320.02              |
| A_68_P20038598 | chr1:12982722-12982766                            | NM_172841:-1528    | Slco5a1    | PROMOTER               | 0.230                                           | 0.707                            | 2334.38             | 1649.89             | 0.162                            | 1690.97             | 274.48              |
| A_68_P32116948 | chr19:41817676-41817720                           | NM_015748:648      | Slit1      | INSIDE                 | 0.386                                           | 0.671                            | 4698.14             | 3152.91             | 0.259                            | 3613.87             | 936.75              |
| A_68_P32116953 | chr19:41818287-41818331                           | NM_015748:38       | Slit1      | INSIDE                 | 0.299                                           | 1.381                            | 5569.52             | 7689.30             | 0.412                            | 4138.15             | 1705.80             |
| A_68_P23668849 | chr5:48375003-48375047                            | NM_178804:631      | Slit2      | INSIDE                 | 0.328                                           | 0.737                            | 2370.43             | 1748.07             | 0.242                            | 1695.31             | 409.93              |
| A_68_P23668851 | chr5:48375153-48375197                            | NM_178804:781      | Slit2      | INSIDE                 | 0.125                                           | 0.662                            | 2755.17             | 1823.56             | 0.083                            | 1884.78             | 155.78              |
| A_68_P23668871 | chr5:48377683-48377731                            | NM_178804:3313     | Slit2      | INSIDE                 | 0.236                                           | 0.450                            | 1498.39             | 673.99              | 0.106                            | 1081.97             | 114.74              |
| A_68_P27704162 | chr11:34934585-34934629                           | NM_011412:-351     | Slit3      | PROMOTER               | 0.344                                           | 0.467                            | 1586.99             | 740.41              | 0.161                            | 1269.13             | 203.90              |
| A_68_P29892688 | chr14:109310708-109310754                         | NM_199065:2726     | Slitrk1    | INSIDE                 | 0.242                                           | 0.479                            | 1492.99             | 715.24              | 0.116                            | 1061.43             | 122.83              |
| A_68_P32427540 | chrX:61528858-61528902                            | NM_178740:1291     | Slitrk4    | INSIDE                 | 0.152                                           | 1.779                            | 2360.34             | 4199.69             | 0.270                            | 913.40              | 247.07              |
| A_68_P32427552 | chrX:61530169-61530213                            | NM_178740:-19      | Slitrk4    | PROMOTER               | 0.281                                           | 1.914                            | 10588.74            | 20265.47            | 0.537                            | 4113.15             | 2209.98             |



| ProbeName      | Target position of probe on CpG island microarray | TargetID          | GeneSymbol | CpG island Description | Ratio of relative methylation (TiO2-NP/Vehicle) | Sham group                       |                     |                     | TiO <sub>2</sub> -H group        |                     |                     |
|----------------|---------------------------------------------------|-------------------|------------|------------------------|-------------------------------------------------|----------------------------------|---------------------|---------------------|----------------------------------|---------------------|---------------------|
|                |                                                   |                   |            |                        |                                                 | Relative methylation (Cy-5/Cy-3) | Cy-3 signal (Input) | Cy-5 signal (MeDIP) | Relative methylation (Cy-5/Cy-3) | Cy-3 signal (Input) | Cy-5 signal (MeDIP) |
| A_68_P32427553 | chrX:61530261-61530305                            | NM_178740:-111    | Slitrk4    | PROMOTER               | 0.222                                           | 2.360                            | 6864.58             | 16201.24            | 0.523                            | 2553.62             | 1336.04             |
| A_68_P29904270 | chr14:112074911-112074955                         | NM_198865:596     | Slitrk5    | INSIDE                 | 0.188                                           | 0.529                            | 1531.50             | 810.51              | 0.100                            | 1155.28             | 115.06              |
| A_68_P32150751 | chr19:47654747-47654794                           | NM_001164639:262  | Slk        | INSIDE                 | 0.224                                           | 0.664                            | 1068.65             | 709.14              | 0.149                            | 886.09              | 131.91              |
| A_68_P29482226 | chr14:27354098-27354142                           | NM_032008:-894    | Slmap      | PROMOTER               | 0.062                                           | 0.662                            | 5259.13             | 3482.21             | 0.041                            | 3537.96             | 144.74              |
| A_68_P29482227 | chr14:27354230-27354274                           | NM_032008:-1026   | Slmap      | PROMOTER               | 0.199                                           | 0.534                            | 3110.16             | 1661.18             | 0.106                            | 2184.68             | 231.92              |
| A_68_P31791992 | chr18:67624679-67624723                           | NM_144867:198     | Slmo1      | INSIDE                 | 0.437                                           | 0.430                            | 1964.17             | 844.63              | 0.188                            | 1581.87             | 297.14              |
| A_68_P27750513 | chr11:43247484-43247528                           | NM_148673:274     | Slu7       | INSIDE                 | 0.474                                           | 0.604                            | 1473.17             | 889.54              | 0.286                            | 1210.37             | 346.10              |
| A_68_P25501810 | chr7:133839074-133839118                          | NM_029420:201     | Slx1b      | INSIDE                 | 0.528                                           | 0.651                            | 1914.41             | 1247.04             | 0.344                            | 1490.69             | 512.50              |
| A_68_P30507721 | chr16:4003615-4003659                             | NM_177472:-1956   | Slx4       | PROMOTER               | 0.454                                           | 0.362                            | 1657.73             | 600.28              | 0.164                            | 1289.18             | 211.83              |
| A_68_P25994483 | chr8:81923506-81923561                            | NM_008539:-166    | Smad1      | PROMOTER               | 0.250                                           | 0.535                            | 1100.58             | 588.80              | 0.134                            | 899.64              | 120.24              |
| A_68_P31841966 | chr18:76400802-76400846                           | NM_010754:-754    | Smad2      | PROMOTER               | 0.385                                           | 0.482                            | 2841.35             | 1370.16             | 0.186                            | 2146.79             | 399.04              |
| A_68_P31841969 | chr18:76401128-76401172                           | NM_010754:-428    | Smad2      | PROMOTER               | 0.657                                           | 0.581                            | 3962.36             | 2300.73             | 0.382                            | 3061.97             | 1168.17             |
| A_68_P26578199 | chr9:63605284-63605328                            | NM_016769:495     | Smad3      | INSIDE                 | 0.217                                           | 0.487                            | 1865.39             | 909.37              | 0.106                            | 1437.25             | 151.98              |
| A_68_P26578203 | chr9:63605811-63605855                            | NM_016769:-31     | Smad3      | PROMOTER               | 0.457                                           | 0.727                            | 3276.63             | 2383.28             | 0.332                            | 2138.08             | 710.59              |
| A_68_P31827294 | chr18:73863805-73863852                           | NM_008540:-433    | Smad4      | PROMOTER               | 0.080                                           | 0.742                            | 2742.81             | 2035.67             | 0.059                            | 2018.84             | 119.36              |
| A_68_P26579680 | chr9:63870057-63870101                            | NM_008542:-212    | Smad6      | PROMOTER               | 0.185                                           | 0.547                            | 2258.91             | 1236.31             | 0.101                            | 1610.69             | 162.89              |
| A_68_P26579681 | chr9:63870209-63870254                            | NM_008542:-365    | Smad6      | PROMOTER               | 0.138                                           | 0.631                            | 2199.25             | 1387.07             | 0.087                            | 1305.69             | 113.99              |
| A_68_P31836526 | chr18:75526561-75526605                           | NM_001042660:436  | Smad7      | PROMOTER               | 0.521                                           | 0.462                            | 2780.33             | 1284.39             | 0.241                            | 2151.86             | 517.83              |
| A_68_P31836532 | chr18:75527265-75527309                           | NM_001042660:268  | Smad7      | INSIDE                 | 0.257                                           | 0.355                            | 2708.69             | 960.49              | 0.091                            | 2229.45             | 203.56              |
| A_68_P31836541 | chr18:75528547-75528591                           | NM_001042660:1550 | Smad7      | INSIDE                 | 0.227                                           | 0.433                            | 1579.90             | 684.75              | 0.098                            | 1186.66             | 116.88              |
| A_68_P22149789 | chr3:54589967-54590012                            | NM_019483:30486   | Smad9      | INSIDE                 | 0.545                                           | 2.793                            | 2098.47             | 2098.47             | 1.523                            | 693.79              | 1056.72             |
| A_68_P22149839 | chr3:54598091-54598144                            | NM_019483:38614   | Smad9      | INSIDE                 | 0.588                                           | 3.121                            | 567.72              | 1771.93             | 1.836                            | 545.08              | 1000.84             |
| A_68_P32036067 | chr19:26678985-26679030                           | NM_011416:-642    | Smarca2    | PROMOTER               | 0.088                                           | 1.741                            | 5326.76             | 9275.55             | 0.153                            | 3434.24             | 525.22              |
| A_68_P32036080 | chr19:26680365-26680409                           | NM_011416:737     | Smarca2    | INSIDE                 | 0.507                                           | 0.571                            | 1200.32             | 685.53              | 0.290                            | 959.91              | 278.16              |
| A_68_P32036081 | chr19:26680484-26680528                           | NM_011416:857     | Smarca2    | INSIDE                 | 0.495                                           | 0.463                            | 1318.06             | 610.05              | 0.229                            | 1232.79             | 282.36              |
| A_68_P32036084 | chr19:26680907-26680951                           | NM_011416:1279    | Smarca2    | INSIDE                 | 0.096                                           | 0.602                            | 2879.04             | 1733.99             | 0.058                            | 2012.12             | 116.74              |
| A_68_P32036086 | chr19:26681225-26681269                           | NM_011416:1597    | Smarca2    | INSIDE                 | 0.147                                           | 0.496                            | 2365.78             | 1174.36             | 0.073                            | 1580.24             | 115.13              |
| A_68_P32036090 | chr19:26681592-26681637                           | NM_011416:1965    | Smarca2    | INSIDE                 | 0.321                                           | 1.760                            | 1990.52             | 3503.15             | 0.564                            | 1480.23             | 835.27              |
| A_68_P32036092 | chr19:26681843-26681887                           | NM_011416:2215    | Smarca2    | INSIDE                 | 0.382                                           | 0.738                            | 2246.36             | 1657.71             | 0.282                            | 1648.69             | 464.78              |
| A_68_P32036095 | chr19:26682223-26682267                           | NM_011416:2595    | Smarca2    | INSIDE                 | 0.293                                           | 0.657                            | 1770.36             | 1162.95             | 0.192                            | 1363.01             | 261.99              |
| A_68_P27259390 | chr10:75384205-75384249                           | NM_001161853:133  | Smarcb1    | INSIDE                 | 0.500                                           | 0.330                            | 1647.38             | 542.89              | 0.165                            | 1498.10             | 246.72              |
| A_68_P26822087 | chr9:110034313-110034357                          | NM_009211:-193    | Smarcc1    | PROMOTER               | 0.411                                           | 0.545                            | 978.56              | 533.48              | 0.224                            | 789.66              | 176.88              |
| A_68_P30481816 | chr15:99532450-99532494                           | NM_031842:-245    | Smarcd1    | PROMOTER               | 0.298                                           | 0.641                            | 1203.61             | 771.11              | 0.191                            | 906.16              | 172.95              |
| A_68_P28100612 | chr11:106134531-106134575                         | NM_001130187:-266 | Smarcd2    | DIVERGENT_PROMOTER     | 0.148                                           | 0.717                            | 2817.48             | 2019.75             | 0.106                            | 1950.45             | 206.37              |
| A_68_P23542947 | chr5:24104268-24104313                            | NM_025891:3530    | Smarcd3    | INSIDE                 | 0.294                                           | 0.462                            | 1776.32             | 820.22              | 0.136                            | 1418.76             | 192.66              |
| A_68_P23542950 | chr5:24104639-24104683                            | NM_025891:3160    | Smarcd3    | INSIDE                 | 0.371                                           | 0.697                            | 3373.47             | 2352.53             | 0.259                            | 2692.22             | 697.16              |
| A_68_P23542951 | chr5:24104726-24104770                            | NM_025891:3072    | Smarcd3    | INSIDE                 | 0.200                                           | 0.603                            | 2177.16             | 1312.59             | 0.121                            | 1575.82             | 190.31              |
| A_68_P32747584 | chrX:148450937-148450989                          | NM_019710:-8      | Smc1a      | DIVERGENT_PROMOTER     | 0.116                                           | 1.495                            | 1800.44             | 2691.20             | 0.174                            | 692.72              | 120.34              |
| A_68_P32747588 | chrX:148451460-148451504                          | NM_019710:512     | Smc1a      | INSIDE                 | 0.083                                           | 2.064                            | 2069.27             | 4271.13             | 0.171                            | 779.51              | 133.28              |
| A_68_P30398810 | chr15:84962157-84962201                           | NM_080470:209     | Smc1b      | INSIDE                 | 0.313                                           | 1.612                            | 890.62              | 1435.72             | 0.504                            | 837.68              | 422.05              |
| A_68_P22917597 | chr4:52452103-52452147                            | NM_008017:4       | Smc2       | INSIDE                 | 0.409                                           | 0.450                            | 1247.91             | 561.74              | 0.184                            | 1050.69             | 193.22              |
| A_68_P22917598 | chr4:52452191-52452235                            | NM_008017:92      | Smc2       | INSIDE                 | 0.563                                           | 0.530                            | 1960.76             | 1039.04             | 0.298                            | 1727.26             | 514.92              |
| A_68_P32016818 | chr19:23347992-23348036                           | NM_153808:353     | Smc5       | INSIDE                 | 0.177                                           | 0.502                            | 1825.29             | 915.41              | 0.089                            | 1399.17             | 124.51              |
| A_68_P32016820 | chr19:23348207-23348251                           | NM_153808:139     | Smc5       | INSIDE                 | 0.191                                           | 0.612                            | 1393.84             | 852.92              | 0.117                            | 1030.85             | 120.76              |

| ProbeName      | Target position of probe on CpG island microarray | TargetID          | GeneSymbol | CpG island Description | Ratio of relative methylation (TiO2-NP/Vehicle) | Sham group                       |                     |                     | TiO <sub>2</sub> -H group        |                     |                     |
|----------------|---------------------------------------------------|-------------------|------------|------------------------|-------------------------------------------------|----------------------------------|---------------------|---------------------|----------------------------------|---------------------|---------------------|
|                |                                                   |                   |            |                        |                                                 | Relative methylation (Cy-5/Cy-3) | Cy-3 signal (Input) | Cy-5 signal (MeDIP) | Relative methylation (Cy-5/Cy-3) | Cy-3 signal (Input) | Cy-5 signal (MeDIP) |
| A_68_P30370942 | chr15:80064643-80064687                           | NM_178719:155     | Smcr7l     | INSIDE                 | 0.659                                           | 0.560                            | 1635.09             | 915.58              | 0.369                            | 1271.94             | 469.21              |
| A_68_P30370943 | chr15:80064789-80064834                           | NM_178719:302     | Smcr7l     | INSIDE                 | 0.446                                           | 0.655                            | 1700.27             | 1113.63             | 0.292                            | 1248.21             | 364.91              |
| A_68_P27844725 | chr11:60591042-60591086                           | NM_175491:38      | Smcr8      | INSIDE                 | 0.268                                           | 0.531                            | 1262.52             | 670.68              | 0.143                            | 1045.08             | 148.93              |
| A_68_P27844726 | chr11:60591168-60591212                           | NM_175491:164     | Smcr8      | INSIDE                 | 0.589                                           | 0.522                            | 1251.94             | 653.71              | 0.308                            | 882.45              | 271.43              |
| A_68_P27844727 | chr11:60591282-60591326                           | NM_175491:278     | Smcr8      | INSIDE                 | 0.243                                           | 0.570                            | 1093.53             | 623.35              | 0.138                            | 862.45              | 119.33              |
| A_68_P27673275 | chr11:29072187-29072231                           | NM_134034:-698    | Smek2      | PROMOTER               | 0.358                                           | 0.319                            | 1615.34             | 515.58              | 0.114                            | 1184.98             | 135.40              |
| A_68_P27673276 | chr11:29072349-29072395                           | NM_134034:-534    | Smek2      | PROMOTER               | 0.504                                           | 0.498                            | 1991.74             | 991.42              | 0.251                            | 1411.18             | 353.74              |
| A_68_P27673282 | chr11:29072968-29073015                           | NM_134034:85      | Smek2      | INSIDE                 | 0.406                                           | 0.639                            | 949.47              | 606.88              | 0.260                            | 796.75              | 206.96              |
| A_68_P27673287 | chr11:29073384-29073428                           | NM_134034:500     | Smek2      | INSIDE                 | 0.332                                           | 0.541                            | 2795.39             | 1511.34             | 0.180                            | 1975.10             | 354.87              |
| A_68_P27673288 | chr11:29073469-29073513                           | NM_134034:584     | Smek2      | INSIDE                 | 0.224                                           | 0.563                            | 2869.12             | 1616.49             | 0.126                            | 2088.09             | 263.61              |
| A_68_P20723677 | chr1:154749026-154749070                          | NM_001005507:728  | Smg7       | INSIDE                 | 0.193                                           | 1.370                            | 1351.08             | 1850.67             | 0.265                            | 992.60              | 263.05              |
| A_68_P20723689 | chr1:154750745-154750789                          | NM_001005507:-990 | Smg7       | PROMOTER               | 0.213                                           | 0.560                            | 1196.19             | 669.59              | 0.119                            | 1019.43             | 121.35              |
| A_68_P32182252 | chr19:53465097-53465141                           | NM_172429:-55     | Smndc1     | PROMOTER               | 0.139                                           | 0.640                            | 1952.58             | 1249.18             | 0.089                            | 1351.06             | 119.87              |
| A_68_P32182254 | chr19:53465262-53465306                           | NM_172429:-221    | Smndc1     | PROMOTER               | 0.132                                           | 1.442                            | 4708.15             | 6791.25             | 0.190                            | 2951.27             | 561.30              |
| A_68_P32182255 | chr19:53465351-53465395                           | NM_172429:-309    | Smndc1     | PROMOTER               | 0.316                                           | 1.720                            | 2194.67             | 3775.73             | 0.543                            | 1466.27             | 796.49              |
| A_68_P24328151 | chr6:29686313-29686357                            | NM_176996:838     | Smo        | INSIDE                 | 0.521                                           | 0.490                            | 1382.36             | 677.01              | 0.255                            | 1119.40             | 285.82              |
| A_68_P24328152 | chr6:29686394-29686438                            | NM_176996:920     | Smo        | INSIDE                 | 0.354                                           | 0.516                            | 2644.16             | 1363.26             | 0.182                            | 1900.79             | 346.72              |
| A_68_P24328153 | chr6:29686461-29686505                            | NM_176996:986     | Smo        | INSIDE                 | 0.265                                           | 0.565                            | 1568.63             | 886.99              | 0.150                            | 1095.05             | 163.87              |
| A_68_P28578875 | chr12:82127694-82127738                           | NM_001146217:-78  | Smoc1      | PROMOTER               | 0.442                                           | 0.664                            | 1497.68             | 994.72              | 0.294                            | 1107.58             | 325.50              |
| A_68_P28578880 | chr12:82128213-82128257                           | NM_001146217:440  | Smoc1      | INSIDE                 | 0.240                                           | 0.443                            | 1418.74             | 628.52              | 0.106                            | 1109.31             | 117.80              |
| A_68_P31058944 | chr7:14416346-14416390                            | NM_022315:-144    | Smoc2      | PROMOTER               | 0.496                                           | 0.549                            | 1622.83             | 891.43              | 0.272                            | 1123.03             | 305.84              |
| A_68_P21635216 | chr2:131318279-131318323                          | NM_001177833:703  | Smox       | INSIDE                 | 0.610                                           | 0.636                            | 1055.27             | 671.38              | 0.388                            | 808.80              | 313.76              |
| A_68_P27162285 | chr10:57514583-57514627                           | NM_020561:255     | Smpdl3a    | INSIDE                 | 0.520                                           | 0.534                            | 1247.20             | 665.50              | 0.277                            | 986.73              | 273.53              |
| A_68_P27162286 | chr10:57514696-57514740                           | NM_020561:369     | Smpdl3a    | INSIDE                 | 0.282                                           | 0.475                            | 1179.15             | 559.67              | 0.134                            | 929.07              | 124.20              |
| A_68_P32766763 | chrX:153929218-153929262                          | NM_009214:738     | Sms        | INSIDE                 | 0.302                                           | 1.425                            | 1456.92             | 2076.00             | 0.431                            | 606.78              | 261.41              |
| A_68_P27911311 | chr11:72224533-72224583                           | NM_177776:657     | Smtnl2     | INSIDE                 | 0.067                                           | 1.615                            | 2028.51             | 3276.09             | 0.108                            | 1455.58             | 157.84              |
| A_68_P27911313 | chr11:72224759-72224803                           | NM_177776:435     | Smtnl2     | INSIDE                 | 0.393                                           | 0.562                            | 1527.09             | 858.89              | 0.221                            | 1231.22             | 271.86              |
| A_68_P27911317 | chr11:72225169-72225213                           | NM_177776:25      | Smtnl2     | INSIDE                 | 0.441                                           | 0.403                            | 1735.43             | 698.68              | 0.177                            | 1513.33             | 268.61              |
| A_68_P22858652 | chr4:40704660-40704704                            | NM_021535:236     | Smu1       | INSIDE                 | 0.570                                           | 0.652                            | 2674.12             | 1742.33             | 0.372                            | 2167.75             | 805.33              |
| A_68_P22858653 | chr4:40704800-40704844                            | NM_021535:96      | Smu1       | INSIDE                 | 0.257                                           | 0.522                            | 2101.67             | 1097.71             | 0.134                            | 1600.01             | 215.05              |
| A_68_P30502555 | chr15:102999581-102999625                         | NM_027885:-5887   | Smug1      | PROMOTER               | 0.385                                           | 0.569                            | 3410.54             | 1941.02             | 0.219                            | 2647.80             | 580.82              |
| A_68_P20870655 | chr1:181447900-181447944                          | NM_027188:212     | Smyd3      | INSIDE                 | 0.307                                           | 0.486                            | 1813.14             | 881.71              | 0.149                            | 1454.39             | 216.91              |
| A_68_P20870657 | chr1:181448104-181448148                          | NM_027188:8       | Smyd3      | INSIDE                 | 0.254                                           | 0.573                            | 1056.77             | 605.15              | 0.146                            | 806.52              | 117.39              |
| A_68_P24604963 | chr6:85382060-85382104                            | NM_144918:113     | Smyd5      | INSIDE                 | 0.632                                           | 0.612                            | 1158.73             | 708.80              | 0.387                            | 828.46              | 320.23              |
| A_68_P21836027 | chr2:167363971-167364015                          | NM_011427:266     | Snai1      | INSIDE                 | 0.150                                           | 0.528                            | 2122.27             | 1120.19             | 0.079                            | 1607.15             | 127.17              |
| A_68_P21576016 | chr2:120393619-120393664                          | NM_001177792:235  | Snap23     | INSIDE                 | 0.358                                           | 0.463                            | 1332.55             | 617.44              | 0.166                            | 1159.23             | 192.38              |
| A_68_P28540842 | chr12:75065446-75065490                           | NM_178392:-48     | Snapc1     | PROMOTER               | 0.146                                           | 0.520                            | 2184.93             | 1136.69             | 0.076                            | 1599.66             | 121.17              |
| A_68_P28540843 | chr12:75065592-75065636                           | NM_178392:98      | Snapc1     | INSIDE                 | 0.402                                           | 0.389                            | 1905.69             | 741.84              | 0.157                            | 1618.55             | 253.52              |
| A_68_P28540844 | chr12:75065711-75065755                           | NM_178392:216     | Snapc1     | INSIDE                 | 0.650                                           | 0.627                            | 1423.89             | 893.06              | 0.408                            | 1175.17             | 479.01              |
| A_68_P23062262 | chr4:83063627-83063671                            | NM_029949:1       | Snapc3     | INSIDE                 | 0.632                                           | 0.477                            | 1983.02             | 945.11              | 0.301                            | 1568.90             | 472.77              |
| A_68_P21078286 | chr2:26236121-26236165                            | NM_172339:31      | Snapc4     | INSIDE                 | 0.194                                           | 0.520                            | 1546.42             | 803.53              | 0.101                            | 1186.67             | 119.36              |
| A_68_P26580558 | chr9:64027298-64027342                            | NM_183316:217     | Snapc5     | INSIDE                 | 0.534                                           | 0.572                            | 2819.00             | 1612.87             | 0.305                            | 2279.26             | 696.29              |
| A_68_P31709379 | chr18:52927884-52927928                           | NM_001199154:109  | Snaaip     | INSIDE                 | 0.587                                           | 0.598                            | 3074.14             | 1837.96             | 0.351                            | 2558.60             | 897.60              |
| A_68_P28042071 | chr11:95896081-95896125                           | NM_033568:-128    | Snf8       | PROMOTER               | 0.238                                           | 0.480                            | 1180.69             | 567.05              | 0.114                            | 1023.13             | 117.03              |

| ProbeName      | Target position of probe on CpG island microarray | TargetID          | GeneSymbol | CpG island Description | Ratio of relative methylation (TiO2-NP/Vehicle) | Sham group                       |                     |                     | TiO <sub>2</sub> -H group        |                     |                     |
|----------------|---------------------------------------------------|-------------------|------------|------------------------|-------------------------------------------------|----------------------------------|---------------------|---------------------|----------------------------------|---------------------|---------------------|
|                |                                                   |                   |            |                        |                                                 | Relative methylation (Cy-5/Cy-3) | Cy-3 signal (Input) | Cy-5 signal (MeDIP) | Relative methylation (Cy-5/Cy-3) | Cy-3 signal (Input) | Cy-5 signal (MeDIP) |
| A_68_P22488497 | chr3:123211440-123211484                          | NR_028574:-208    | Snhg8      | PROMOTER               | 0.121                                           | 0.544                            | 2563.94             | 1393.82             | 0.066                            | 1843.59             | 121.55              |
| A_68_P23271975 | chr4:124744170-124744214                          | NM_175246:256     | Snip1      | INSIDE                 | 0.318                                           | 0.459                            | 1387.67             | 636.97              | 0.146                            | 1112.09             | 162.20              |
| A_68_P23271976 | chr4:124744252-124744296                          | NM_175246:338     | Snip1      | INSIDE                 | 0.095                                           | 0.656                            | 2594.54             | 1702.23             | 0.062                            | 1892.47             | 117.77              |
| A_68_P30546003 | chr16:11066050-11066094                           | NM_009223:-318    | Snn        | PROMOTER               | 0.367                                           | 0.487                            | 2775.35             | 1351.27             | 0.179                            | 2112.81             | 377.92              |
| A_68_P24090829 | chr5:130293530-130293574                          | NR_003681:-6884   | Snora15    | PROMOTER               | 0.502                                           | 0.646                            | 1032.41             | 666.54              | 0.324                            | 844.36              | 273.80              |
| A_68_P28744648 | chr12:112776290-112776334                         | NR_033168:-2844   | Snora28    | PROMOTER               | 0.159                                           | 0.535                            | 4270.42             | 2286.59             | 0.085                            | 3019.34             | 257.39              |
| A_68_P28744656 | chr12:112777247-112777291                         | NR_033168:-1888   | Snora28    | PROMOTER               | 0.285                                           | 0.489                            | 1390.09             | 679.70              | 0.139                            | 1202.16             | 167.57              |
| A_68_P30475041 | chr15:98364232-98364276                           | NR_034052:-7364   | Snora2b    | PROMOTER               | 0.465                                           | 0.582                            | 4763.06             | 2773.17             | 0.271                            | 3439.02             | 931.88              |
| A_68_P20285517 | chr1:63224065-63224115                            | NR_028558:-1506   | Snora41    | PROMOTER               | 0.211                                           | 0.661                            | 1079.27             | 713.94              | 0.140                            | 870.30              | 121.74              |
| A_68_P27569489 | chr11:6525837-6525881                             | NR_034042:-5436   | Snora5c    | PROMOTER               | 0.262                                           | 0.498                            | 3956.12             | 1972.10             | 0.131                            | 2837.34             | 371.25              |
| A_68_P27569490 | chr11:6525943-6525987                             | NR_034042:-5542   | Snora5c    | PROMOTER               | 0.254                                           | 0.385                            | 2827.29             | 1088.72             | 0.098                            | 2041.96             | 200.00              |
| A_68_P24773074 | chr6:115758230-115758281                          | NR_028546:-134    | Snora7a    | PROMOTER               | 0.167                                           | 0.586                            | 1450.14             | 849.60              | 0.098                            | 1209.77             | 118.50              |
| A_68_P24773075 | chr6:115758321-115758365                          | NR_028546:-221    | Snora7a    | PROMOTER               | 0.261                                           | 0.422                            | 1285.48             | 542.41              | 0.110                            | 1070.96             | 117.83              |
| A_68_P28101955 | chr11:106362323-106362370                         | NR_030703:42      | Snord104   | INSIDE                 | 0.174                                           | 0.626                            | 3342.72             | 2092.04             | 0.109                            | 2440.65             | 265.07              |
| A_68_P21628855 | chr2:130100231-130100275                          | NR_028547:-998    | Snord110   | PROMOTER               | 0.066                                           | 0.675                            | 3651.49             | 2464.71             | 0.044                            | 2749.58             | 121.58              |
| A_68_P25362154 | chr7:106631883-106631927                          | NR_002172:-462    | Snord15a   | PROMOTER               | 0.190                                           | 0.480                            | 2397.94             | 1152.03             | 0.091                            | 1735.84             | 158.48              |
| A_68_P25362155 | chr7:106631960-106632004                          | NR_002172:-540    | Snord15a   | PROMOTER               | 0.636                                           | 0.445                            | 1544.64             | 686.94              | 0.283                            | 1260.32             | 356.51              |
| A_68_P25091293 | chr7:52383927-52383971                            | NR_000002:-1115   | Snord32a   | PROMOTER               | 0.216                                           | 0.496                            | 2853.82             | 1416.27             | 0.107                            | 2008.95             | 215.02              |
| A_68_P31834370 | chr18:75160579-75160623                           | NR_028552:-121    | Snord58b   | PROMOTER               | 0.283                                           | 0.716                            | 2081.82             | 1491.03             | 0.203                            | 1612.49             | 326.96              |
| A_68_P32401092 | chrX:54645722-54645768                            | NR_002903:-1058   | Snord61    | PROMOTER               | 0.236                                           | 1.548                            | 1608.93             | 2491.29             | 0.365                            | 688.02              | 251.46              |
| A_68_P32401095 | chrX:54646102-54646148                            | NR_002903:-1438   | Snord61    | PROMOTER               | 0.136                                           | 1.529                            | 1540.62             | 2355.91             | 0.209                            | 624.49              | 130.23              |
| A_68_P26237919 | chr8:125626230-125626274                          | NR_028128:-705    | Snord68    | PROMOTER               | 0.250                                           | 0.303                            | 2213.47             | 670.78              | 0.076                            | 1631.05             | 123.52              |
| A_68_P29982096 | chr15:5067068-5067116                             | NR_028091:-1328   | Snord72    | PROMOTER               | 0.246                                           | 0.580                            | 980.55              | 568.62              | 0.143                            | 815.50              | 116.45              |
| A_68_P20411726 | chr1:88255561-88255605                            | NR_002851:-2680   | Snord82    | PROMOTER               | 0.552                                           | 0.724                            | 2936.10             | 2125.00             | 0.400                            | 2155.77             | 861.95              |
| A_68_P20024912 | chr1:9934064-9934108                              | NR_004410:-1462   | Snord87    | PROMOTER               | 0.267                                           | 0.519                            | 3610.77             | 1875.67             | 0.139                            | 2681.81             | 371.53              |
| A_68_P27779980 | chr11:48613984-48614028                           | NR_028563:-1528   | Snord96a   | PROMOTER               | 0.286                                           | 0.484                            | 1131.53             | 548.14              | 0.139                            | 850.77              | 118.00              |
| A_68_P27779981 | chr11:48614053-48614098                           | NR_028563:-1459   | Snord96a   | PROMOTER               | 0.251                                           | 0.560                            | 1688.88             | 946.06              | 0.141                            | 1321.04             | 185.84              |
| A_68_P27779983 | chr11:48614301-48614357                           | NR_028563:-1206   | Snord96a   | PROMOTER               | 0.179                                           | 0.631                            | 1358.53             | 857.39              | 0.113                            | 1073.11             | 121.33              |
| A_68_P21745018 | chr2:151457749-151457793                          | NM_198214:499     | Snph       | INSIDE                 | 0.379                                           | 0.513                            | 1905.37             | 977.81              | 0.195                            | 1525.99             | 296.87              |
| A_68_P27687370 | chr11:32105281-32105325                           | NM_030093:-112    | Snmp25     | DIVERGENT_PROMOTER     | 0.128                                           | 0.712                            | 5116.91             | 3643.70             | 0.091                            | 3504.23             | 318.35              |
| A_68_P27687371 | chr11:32105349-32105400                           | NM_030093:-40     | Snmp25     | DIVERGENT_PROMOTER     | 0.227                                           | 0.697                            | 1684.48             | 1174.71             | 0.158                            | 1181.82             | 186.84              |
| A_68_P25092883 | chr7:52650953-52650997                            | NM_009224:43      | Snmp70     | INSIDE                 | 0.661                                           | 0.674                            | 1737.70             | 1170.49             | 0.445                            | 1471.32             | 655.14              |
| A_68_P25092884 | chr7:52651057-52651101                            | NM_009224:-61     | Snmp70     | PROMOTER               | 0.246                                           | 0.682                            | 1805.87             | 1230.80             | 0.168                            | 1483.35             | 248.75              |
| A_68_P25016043 | chr7:27980751-27980801                            | NM_001046637:3    | Snrpa      | INSIDE                 | 0.227                                           | 0.682                            | 976.34              | 666.12              | 0.155                            | 786.18              | 121.56              |
| A_68_P25016046 | chr7:27981095-27981139                            | NM_001046637:-337 | Snrpa      | PROMOTER               | 0.228                                           | 0.556                            | 2592.11             | 1441.01             | 0.127                            | 1811.49             | 230.09              |
| A_68_P25186101 | chr7:73205809-73205860                            | NM_021336:613     | Snrpa1     | INSIDE                 | 0.321                                           | 0.520                            | 1014.95             | 527.50              | 0.167                            | 724.25              | 120.79              |
| A_68_P21628394 | chr2:130004810-130004854                          | NM_009225:268     | Snrpb      | INSIDE                 | 0.242                                           | 0.439                            | 1231.64             | 540.40              | 0.106                            | 1112.82             | 118.16              |
| A_68_P31118766 | chr17:27976996-27977040                           | NM_011432:-13     | Snrpc      | PROMOTER               | 0.444                                           | 0.525                            | 2298.67             | 1206.29             | 0.233                            | 1889.17             | 439.82              |
| A_68_P24991727 | chr7:19735291-19735345                            | NM_026943:132     | Snrpd2     | INSIDE                 | 0.112                                           | 0.687                            | 1994.22             | 1370.38             | 0.077                            | 1564.65             | 120.20              |
| A_68_P27256923 | chr10:74980993-74981047                           | NM_026095:234     | Snrpd3     | INSIDE                 | 0.507                                           | 0.481                            | 1409.53             | 678.13              | 0.244                            | 1050.05             | 256.07              |
| A_68_P20628459 | chr1:135506499-135506543                          | NM_009227:337     | Snrpe      | INSIDE                 | 0.273                                           | 0.660                            | 4416.18             | 2913.10             | 0.180                            | 3339.08             | 600.44              |
| A_68_P24609765 | chr6:86321486-86321530                            | NM_026506:-25     | Snrpg      | PROMOTER               | 0.541                                           | 0.561                            | 980.67              | 550.01              | 0.304                            | 827.07              | 251.16              |
| A_68_P21760344 | chr2:154233694-154233738                          | NM_009228:104     | Snta1      | INSIDE                 | 0.532                                           | 0.555                            | 1883.34             | 1044.62             | 0.295                            | 1697.06             | 500.75              |
| A_68_P30234984 | chr15:55738403-55738447                           | NM_016667:80      | Sntb1      | INSIDE                 | 0.251                                           | 0.584                            | 1983.17             | 1158.14             | 0.147                            | 1406.89             | 206.35              |

| ProbeName      | Target position of probe on CpG island microarray | TargetID           | GeneSymbol | CpG island Description | Ratio of relative methylation (TiO2-NP/Vehicle) | Sham group                       |                     |                     | TiO <sub>2</sub> -H group        |                     |                     |
|----------------|---------------------------------------------------|--------------------|------------|------------------------|-------------------------------------------------|----------------------------------|---------------------|---------------------|----------------------------------|---------------------|---------------------|
|                |                                                   |                    |            |                        |                                                 | Relative methylation (Cy-5/Cy-3) | Cy-3 signal (Input) | Cy-5 signal (MeDIP) | Relative methylation (Cy-5/Cy-3) | Cy-3 signal (Input) | Cy-5 signal (MeDIP) |
| A_68_P26142250 | chr8:109460044-109460088                          | NM_009229:417      | Sntb2      | INSIDE                 | 0.452                                           | 0.514                            | 1474.45             | 758.31              | 0.233                            | 1244.93             | 289.51              |
| A_68_P20022048 | chr1:9289699-9289746                              | NM_027671:89       | Sntg1      | INSIDE                 | 0.269                                           | 0.571                            | 937.05              | 534.97              | 0.154                            | 776.36              | 119.29              |
| A_68_P20022049 | chr1:9289822-9289866                              | NM_027671:-33      | Sntg1      | PROMOTER               | 0.370                                           | 0.527                            | 1337.96             | 704.86              | 0.195                            | 1107.80             | 216.19              |
| A_68_P24445012 | chr6:51542432-51542476                            | NM_001127348:47933 | Snx10      | DOWNSTREAM             | 0.317                                           | 0.610                            | 1280.18             | 781.43              | 0.193                            | 957.39              | 185.08              |
| A_68_P32562915 | chrX:98417474-98417518                            | NM_001110311:406   | Snx12      | INSIDE                 | 0.252                                           | 2.320                            | 2372.61             | 5505.41             | 0.585                            | 1069.45             | 626.07              |
| A_68_P28351013 | chr12:35731615-35731659                           | NM_001014973:-224  | Snx13      | PROMOTER               | 0.546                                           | 0.624                            | 967.64              | 604.04              | 0.341                            | 954.36              | 325.42              |
| A_68_P26710070 | chr9:88334164-88334211                            | NM_172926:-398     | Snx14      | PROMOTER               | 0.141                                           | 0.522                            | 2405.68             | 1255.27             | 0.074                            | 1962.30             | 144.84              |
| A_68_P29341537 | chr13:114407731-114407779                         | NM_130796:1018     | Snx18      | INSIDE                 | 0.289                                           | 0.539                            | 1023.50             | 551.54              | 0.156                            | 768.99              | 119.62              |
| A_68_P26394906 | chr9:30234770-30234814                            | NM_028874:-121     | Snx19      | PROMOTER               | 0.529                                           | 0.634                            | 2493.71             | 1580.00             | 0.335                            | 2136.38             | 716.08              |
| A_68_P26591018 | chr9:65917336-65917381                            | NM_001025612:180   | Snx22      | INSIDE                 | 0.194                                           | 0.615                            | 1246.66             | 766.68              | 0.119                            | 971.79              | 115.90              |
| A_68_P31712046 | chr18:53405025-53405069                           | NM_029394:-269     | Snx24      | PROMOTER               | 0.169                                           | 0.490                            | 1942.13             | 951.15              | 0.083                            | 1472.37             | 122.03              |
| A_68_P22339767 | chr3:94386067-94386111                            | NM_029721:536      | Snx27      | INSIDE                 | 0.439                                           | 0.611                            | 6243.91             | 3812.84             | 0.268                            | 4648.40             | 1244.74             |
| A_68_P22339768 | chr3:94386146-94386190                            | NM_029721:456      | Snx27      | INSIDE                 | 0.396                                           | 0.513                            | 10731.28            | 5502.96             | 0.203                            | 7576.74             | 1538.58             |
| A_68_P22339769 | chr3:94386307-94386351                            | NM_029721:296      | Snx27      | INSIDE                 | 0.321                                           | 0.349                            | 4540.45             | 1585.08             | 0.112                            | 3089.74             | 346.00              |
| A_68_P22958420 | chr4:59819277-59819321                            | NM_172468:777      | Snx30      | INSIDE                 | 0.453                                           | 0.594                            | 1284.35             | 762.54              | 0.269                            | 988.56              | 265.67              |
| A_68_P22958421 | chr4:59819390-59819434                            | NM_172468:891      | Snx30      | INSIDE                 | 0.293                                           | 0.701                            | 1625.10             | 1138.38             | 0.205                            | 1357.73             | 278.35              |
| A_68_P31929158 | chr19:5510644-5510688                             | NM_001024560:-177  | Snx32      | PROMOTER               | 0.125                                           | 0.551                            | 2326.60             | 1281.65             | 0.069                            | 1788.48             | 123.46              |
| A_68_P31929160 | chr19:5510818-5510862                             | NM_001024560:-351  | Snx32      | PROMOTER               | 0.329                                           | 1.631                            | 6529.73             | 10647.34            | 0.537                            | 4546.26             | 2442.33             |
| A_68_P30656968 | chr16:33251336-33251380                           | NM_080557:-183     | Snx4       | PROMOTER               | 0.523                                           | 0.611                            | 1409.78             | 860.70              | 0.320                            | 1120.48             | 358.00              |
| A_68_P30656972 | chr16:33251779-33251823                           | NM_080557:259      | Snx4       | INSIDE                 | 0.599                                           | 0.405                            | 1770.76             | 717.61              | 0.243                            | 1379.56             | 334.67              |
| A_68_P31019372 | chr17:5840861-5840905                             | NM_025664:-497     | Snx9       | PROMOTER               | 0.549                                           | 0.626                            | 1071.86             | 671.50              | 0.344                            | 818.74              | 281.71              |
| A_68_P27098028 | chr10:42740979-42741023                           | NM_175407:153336   | Sobp       | INSIDE                 | 0.307                                           | 0.630                            | 2639.78             | 1664.18             | 0.194                            | 2234.42             | 432.43              |
| A_68_P27098034 | chr10:42741868-42741912                           | NM_175407:152446   | Sobp       | INSIDE                 | 0.280                                           | 0.645                            | 1619.54             | 1043.79             | 0.181                            | 1356.07             | 244.96              |
| A_68_P30544452 | chr16:10784908-10784952                           | NM_009896:699      | Soes1      | INSIDE                 | 0.246                                           | 0.522                            | 4884.69             | 2550.00             | 0.129                            | 3844.45             | 494.19              |
| A_68_P30544457 | chr16:10785415-10785459                           | NM_009896:193      | Soes1      | INSIDE                 | 0.484                                           | 0.417                            | 2700.03             | 1126.63             | 0.202                            | 2124.78             | 428.99              |
| A_68_P30544461 | chr16:10785857-10785901                           | NM_009896:-249     | Soes1      | PROMOTER               | 0.368                                           | 0.595                            | 1490.91             | 887.75              | 0.219                            | 1122.29             | 245.84              |
| A_68_P27365025 | chr10:94878000-94878046                           | NM_001168657:-105  | Soes2      | PROMOTER               | 0.071                                           | 1.614                            | 1570.75             | 2535.47             | 0.115                            | 1049.86             | 120.93              |
| A_68_P27365026 | chr10:94878069-94878116                           | NM_001168657:-175  | Soes2      | PROMOTER               | 0.155                                           | 1.339                            | 2319.06             | 3105.68             | 0.207                            | 1617.09             | 335.02              |
| A_68_P27365032 | chr10:94878721-94878765                           | NM_001168656:-624  | Soes2      | PROMOTER               | 0.238                                           | 0.542                            | 1075.34             | 582.41              | 0.129                            | 951.34              | 122.87              |
| A_68_P28168277 | chr11:117829266-117829310                         | NM_007707:1392     | Soes3      | INSIDE                 | 0.306                                           | 0.439                            | 1397.72             | 613.99              | 0.134                            | 1080.52             | 145.26              |
| A_68_P28168283 | chr11:117829826-117829870                         | NM_007707:832      | Soes3      | INSIDE                 | 0.324                                           | 0.656                            | 1019.69             | 668.44              | 0.212                            | 822.72              | 174.58              |
| A_68_P28168284 | chr11:117829892-117829936                         | NM_007707:766      | Soes3      | INSIDE                 | 0.115                                           | 0.673                            | 1956.73             | 1317.12             | 0.077                            | 1544.55             | 119.17              |
| A_68_P28168285 | chr11:117830022-117830066                         | NM_007707:636      | Soes3      | INSIDE                 | 0.274                                           | 0.580                            | 1701.31             | 987.33              | 0.159                            | 1192.17             | 189.29              |
| A_68_P28168286 | chr11:117830189-117830233                         | NM_007707:470      | Soes3      | INSIDE                 | 0.473                                           | 0.485                            | 1355.41             | 657.76              | 0.230                            | 1091.57             | 250.74              |
| A_68_P28168289 | chr11:117830449-117830493                         | NM_007707:210      | Soes3      | INSIDE                 | 0.410                                           | 0.498                            | 1705.64             | 849.37              | 0.204                            | 1381.55             | 281.93              |
| A_68_P29581356 | chr14:47896866-47896910                           | NM_080843:71       | Soes4      | INSIDE                 | 0.334                                           | 0.538                            | 2225.72             | 1196.94             | 0.180                            | 1783.39             | 320.60              |
| A_68_P29581357 | chr14:47896981-47897025                           | NM_080843:185      | Soes4      | INSIDE                 | 0.451                                           | 0.405                            | 1761.55             | 714.21              | 0.183                            | 1369.28             | 250.22              |
| A_68_P31421207 | chr17:87507571-87507615                           | NM_019654:574      | Soes5      | INSIDE                 | 0.220                                           | 0.603                            | 1102.86             | 664.52              | 0.133                            | 865.96              | 114.97              |
| A_68_P31909280 | chr18:89063162-89063206                           | NM_018821:415      | Soes6      | INSIDE                 | 0.382                                           | 0.706                            | 2132.44             | 1504.63             | 0.269                            | 1772.95             | 477.74              |
| A_68_P28050111 | chr11:97223439-97223483                           | NM_138657:-404     | Soes7      | PROMOTER               | 0.251                                           | 0.486                            | 1061.15             | 515.54              | 0.122                            | 1010.41             | 123.40              |
| A_68_P28050118 | chr11:97224447-97224491                           | NM_138657:604      | Soes7      | INSIDE                 | 0.291                                           | 0.494                            | 1273.59             | 629.35              | 0.144                            | 1088.65             | 156.52              |
| A_68_P30955583 | chr16:90220671-90220715                           | NM_011434:-294     | Sod1       | PROMOTER               | 0.170                                           | 0.566                            | 1703.51             | 963.76              | 0.096                            | 1208.35             | 116.14              |
| A_68_P31054933 | chr17:13200672-13200716                           | NM_013671:-10      | Sod2       | PROMOTER               | 0.427                                           | 0.497                            | 1484.39             | 737.22              | 0.212                            | 1248.75             | 264.61              |
| A_68_P30964217 | chr16:91660217-91660261                           | NM_019973:12170    | Son        | INSIDE                 | 0.631                                           | 2.702                            | 598.42              | 1617.13             | 1.705                            | 534.39              | 910.91              |

| ProbeName      | Target position of probe on CpG island microarray | TargetID         | GeneSymbol | CpG island Description | Ratio of relative methylation (TiO2-NP/Vehicle) | Sham group                       |                     |                     | TiO <sub>2</sub> -H group        |                     |                     |
|----------------|---------------------------------------------------|------------------|------------|------------------------|-------------------------------------------------|----------------------------------|---------------------|---------------------|----------------------------------|---------------------|---------------------|
|                |                                                   |                  |            |                        |                                                 | Relative methylation (Cy-5/Cy-3) | Cy-3 signal (Input) | Cy-5 signal (MeDIP) | Relative methylation (Cy-5/Cy-3) | Cy-3 signal (Input) | Cy-5 signal (MeDIP) |
| A_68_P32109309 | chr19:40588021-40588065                           | NM_178362:184    | Sorbs1     | INSIDE                 | 0.573                                           | 0.468                            | 1716.44             | 804.03              | 0.269                            | 1455.53             | 390.82              |
| A_68_P29699882 | chr14:70591597-70591641                           | NM_011366:15826  | Sorbs3     | INSIDE                 | 0.142                                           | 0.740                            | 4672.18             | 3458.45             | 0.105                            | 3122.61             | 329.25              |
| A_68_P32168786 | chr19:50752601-50752645                           | NM_021377:480    | Sores1     | INSIDE                 | 0.554                                           | 0.620                            | 1509.19             | 935.50              | 0.343                            | 1213.94             | 416.53              |
| A_68_P23607365 | chr5:36740222-36740266                            | NM_030889:544    | Sores2     | INSIDE                 | 0.433                                           | 0.596                            | 1044.48             | 622.61              | 0.258                            | 879.21              | 227.18              |
| A_68_P21585133 | chr2:122060313-122060357                          | NM_146126:-240   | Sord       | PROMOTER               | 0.541                                           | 0.546                            | 1617.85             | 884.11              | 0.296                            | 1450.86             | 429.30              |
| A_68_P26453528 | chr9:41931891-41931935                            | NM_011436:460    | Sorl1      | INSIDE                 | 0.545                                           | 0.463                            | 1655.88             | 766.03              | 0.252                            | 1376.90             | 347.07              |
| A_68_P31383391 | chr17:80878801-80878845                           | NM_009231:971    | Sos1       | INSIDE                 | 0.182                                           | 0.509                            | 1623.90             | 826.37              | 0.093                            | 1268.82             | 117.54              |
| A_68_P31383392 | chr17:80878882-80878927                           | NM_009231:889    | Sos1       | INSIDE                 | 0.130                                           | 0.617                            | 1928.79             | 1189.92             | 0.080                            | 1500.61             | 120.37              |
| A_68_P31383394 | chr17:80879061-80879105                           | NM_009231:711    | Sos1       | INSIDE                 | 0.334                                           | 0.444                            | 2345.35             | 1041.49             | 0.149                            | 1857.25             | 275.85              |
| A_68_P25661253 | chr8:12396004-12396049                            | NM_009233:508    | Sox1       | INSIDE                 | 0.554                                           | 0.488                            | 1936.47             | 945.71              | 0.271                            | 1446.16             | 391.54              |
| A_68_P25661254 | chr8:12396094-12396138                            | NM_009233:598    | Sox1       | INSIDE                 | 0.374                                           | 0.523                            | 1735.04             | 908.20              | 0.196                            | 1348.89             | 263.86              |
| A_68_P25661257 | chr8:12396498-12396542                            | NM_009233:1002   | Sox1       | INSIDE                 | 0.467                                           | 0.699                            | 2548.57             | 1781.43             | 0.326                            | 1820.57             | 594.08              |
| A_68_P28307234 | chr12:28023843-28023887                           | NM_009234:3719   | Sox11      | INSIDE                 | 0.650                                           | 0.673                            | 1241.04             | 834.66              | 0.437                            | 1084.51             | 474.32              |
| A_68_P28307238 | chr12:28024309-28024353                           | NM_009234:3253   | Sox11      | INSIDE                 | 0.643                                           | 0.665                            | 1290.02             | 857.63              | 0.427                            | 1168.43             | 499.42              |
| A_68_P28307239 | chr12:28024428-28024472                           | NM_009234:3133   | Sox11      | INSIDE                 | 0.283                                           | 0.476                            | 3106.48             | 1479.64             | 0.135                            | 2467.91             | 332.14              |
| A_68_P28307260 | chr12:28026977-28027021                           | NM_009234:585    | Sox11      | INSIDE                 | 0.236                                           | 0.492                            | 2068.26             | 1018.46             | 0.116                            | 1588.87             | 184.55              |
| A_68_P28307269 | chr12:28028213-28028257                           | NM_009234:-651   | Sox11      | PROMOTER               | 0.201                                           | 0.597                            | 2510.47             | 1499.70             | 0.120                            | 1675.13             | 200.76              |
| A_68_P21749116 | chr2:152222489-152222533                          | NM_011438:1272   | Sox12      | INSIDE                 | 0.248                                           | 0.715                            | 1820.46             | 1302.14             | 0.178                            | 1253.43             | 222.55              |
| A_68_P21749117 | chr2:152222565-152222609                          | NM_011438:1196   | Sox12      | INSIDE                 | 0.324                                           | 0.582                            | 2264.60             | 1317.36             | 0.188                            | 1759.69             | 331.63              |
| A_68_P26766610 | chr9:99771206-99771250                            | NM_011440:5361   | Sox14      | DOWNSTREAM             | 0.276                                           | 1.584                            | 2458.98             | 3895.31             | 0.438                            | 1555.38             | 681.07              |
| A_68_P26766650 | chr9:99775559-99775603                            | NM_011440:1009   | Sox14      | INSIDE                 | 0.498                                           | 0.698                            | 1933.57             | 1350.29             | 0.348                            | 1542.75             | 536.85              |
| A_68_P26766651 | chr9:99775638-99775682                            | NM_011440:929    | Sox14      | INSIDE                 | 0.242                                           | 0.592                            | 1159.00             | 686.08              | 0.143                            | 996.97              | 142.58              |
| A_68_P26766654 | chr9:99775916-99775960                            | NM_011440:651    | Sox14      | INSIDE                 | 0.355                                           | 0.531                            | 1665.50             | 883.77              | 0.188                            | 1293.35             | 243.31              |
| A_68_P26766655 | chr9:99776052-99776096                            | NM_011440:515    | Sox14      | INSIDE                 | 0.245                                           | 0.660                            | 996.38              | 657.82              | 0.162                            | 762.66              | 123.39              |
| A_68_P20005798 | chr1:4482441-4482485                              | NM_011441:4032   | Sox17      | INSIDE                 | 0.615                                           | 0.428                            | 1368.50             | 585.40              | 0.263                            | 1140.95             | 300.06              |
| A_68_P20005837 | chr1:4486985-4487029                              | NM_011441:-512   | Sox17      | PROMOTER               | 0.342                                           | 0.587                            | 1511.13             | 887.02              | 0.201                            | 1226.86             | 246.02              |
| A_68_P20005839 | chr1:4487234-4487278                              | NM_011441:-762   | Sox17      | PROMOTER               | 0.292                                           | 0.467                            | 1142.06             | 533.59              | 0.137                            | 911.72              | 124.50              |
| A_68_P20005842 | chr1:4487520-4487564                              | NM_011441:-1048  | Sox17      | PROMOTER               | 0.264                                           | 0.628                            | 2618.18             | 1643.63             | 0.166                            | 1927.02             | 319.87              |
| A_68_P21911961 | chr2:181405887-181405931                          | NM_009236:437    | Sox18      | INSIDE                 | 0.206                                           | 0.419                            | 1844.05             | 773.02              | 0.086                            | 1340.17             | 115.64              |
| A_68_P22049384 | chr3:34548485-34548529                            | NM_011443:-420   | Sox2       | PROMOTER               | 0.180                                           | 0.689                            | 2288.19             | 1577.17             | 0.124                            | 1629.69             | 202.39              |
| A_68_P22049389 | chr3:34549058-34549109                            | NM_011443:157    | Sox2       | INSIDE                 | 0.250                                           | 0.374                            | 1498.19             | 560.90              | 0.094                            | 1236.66             | 115.88              |
| A_68_P22049390 | chr3:34549137-34549181                            | NM_011443:232    | Sox2       | INSIDE                 | 0.532                                           | 0.527                            | 2314.83             | 1219.76             | 0.280                            | 1864.55             | 522.61              |
| A_68_P22049393 | chr3:34549575-34549619                            | NM_011443:670    | Sox2       | INSIDE                 | 0.359                                           | 0.676                            | 1895.61             | 1282.33             | 0.243                            | 1431.82             | 348.20              |
| A_68_P29937400 | chr14:118625343-118625387                         | NM_177753:10888  | Sox21      | DOWNSTREAM             | 0.572                                           | 0.509                            | 1005.32             | 511.31              | 0.291                            | 804.61              | 233.91              |
| A_68_P29937467 | chr14:118633748-118633793                         | NM_177753:2482   | Sox21      | INSIDE                 | 0.118                                           | 0.747                            | 3815.18             | 2850.82             | 0.089                            | 2628.25             | 232.63              |
| A_68_P29937474 | chr14:118634627-118634671                         | NM_177753:1604   | Sox21      | INSIDE                 | 0.268                                           | 0.593                            | 905.42              | 536.49              | 0.159                            | 755.00              | 119.69              |
| A_68_P29937481 | chr14:118635351-118635395                         | NM_177753:880    | Sox21      | INSIDE                 | 0.107                                           | 1.819                            | 962.28              | 1750.05             | 0.194                            | 699.66              | 135.63              |
| A_68_P29937483 | chr14:118635646-118635690                         | NM_177753:584    | Sox21      | INSIDE                 | 0.471                                           | 0.649                            | 2099.79             | 1362.56             | 0.305                            | 1634.50             | 499.23              |
| A_68_P22049509 | chr3:34562671-34562720                            | NR_015580:103393 | Sox2ot     | INSIDE                 | 0.137                                           | 0.636                            | 1901.02             | 1208.17             | 0.087                            | 1400.57             | 122.27              |
| A_68_P22049514 | chr3:34563117-34563161                            | NR_015580:103836 | Sox2ot     | INSIDE                 | 0.403                                           | 0.484                            | 2066.20             | 999.89              | 0.195                            | 1574.89             | 307.29              |
| A_68_P22049518 | chr3:34563441-34563498                            | NR_015580:104167 | Sox2ot     | INSIDE                 | 0.270                                           | 0.425                            | 1444.16             | 613.38              | 0.115                            | 1024.52             | 117.35              |
| A_68_P32415806 | chrX:58146341-58146385                            | NM_009237:243    | Sox3       | INSIDE                 | 0.254                                           | 2.374                            | 1679.56             | 3986.93             | 0.602                            | 802.85              | 483.50              |
| A_68_P32415812 | chrX:58146994-58147038                            | NM_009237:-411   | Sox3       | PROMOTER               | 0.060                                           | 1.992                            | 2303.86             | 4589.02             | 0.119                            | 996.00              | 118.31              |
| A_68_P32415814 | chrX:58147306-58147350                            | NM_009237:-723   | Sox3       | PROMOTER               | 0.309                                           | 1.551                            | 3090.46             | 4792.71             | 0.479                            | 1344.24             | 644.52              |

| ProbeName      | Target position of probe on CpG island microarray | TargetID           | GeneSymbol | CpG island Description | Ratio of relative methylation (TiO2-NP/Vehicle) | Sham group                       |                     |                     | TiO <sub>2</sub> -H group        |                     |                     |
|----------------|---------------------------------------------------|--------------------|------------|------------------------|-------------------------------------------------|----------------------------------|---------------------|---------------------|----------------------------------|---------------------|---------------------|
|                |                                                   |                    |            |                        |                                                 | Relative methylation (Cy-5/Cy-3) | Cy-3 signal (Input) | Cy-5 signal (MeDIP) | Relative methylation (Cy-5/Cy-3) | Cy-3 signal (Input) | Cy-5 signal (MeDIP) |
| A_68_P28909015 | chr13:29050121-29050165                           | NM_009238:-4591    | Sox4       | PROMOTER               | 0.379                                           | 0.568                            | 1790.08             | 1017.56             | 0.216                            | 1321.89             | 285.13              |
| A_68_P28909029 | chr13:29051502-29051546                           | NM_009238:-5973    | Sox4       | PROMOTER               | 0.370                                           | 0.592                            | 1691.19             | 1001.67             | 0.219                            | 1214.69             | 266.31              |
| A_68_P29664621 | chr14:64562219-64562263                           | NM_011446:-302     | Sox7       | PROMOTER               | 0.287                                           | 0.675                            | 1774.40             | 1198.17             | 0.194                            | 1488.83             | 288.88              |
| A_68_P31104790 | chr17:25707537-25707581                           | NM_011447:73       | Sox8       | INSIDE                 | 0.474                                           | 0.513                            | 1839.25             | 943.00              | 0.243                            | 1423.75             | 346.34              |
| A_68_P31104791 | chr17:25707616-25707662                           | NM_011447:-7       | Sox8       | DIVERGENT_PROMOTER     | 0.293                                           | 0.529                            | 1282.74             | 678.92              | 0.155                            | 1010.72             | 156.57              |
| A_68_P28137823 | chr11:112643047-112643091                         | NM_011448:-455     | Sox9       | PROMOTER               | 0.503                                           | 0.674                            | 943.84              | 635.97              | 0.339                            | 792.57              | 268.85              |
| A_68_P28137824 | chr11:112643225-112643274                         | NM_011448:-274     | Sox9       | PROMOTER               | 0.238                                           | 0.598                            | 1143.53             | 683.66              | 0.142                            | 851.53              | 121.00              |
| A_68_P28137827 | chr11:112643586-112643636                         | NM_011448:87       | Sox9       | INSIDE                 | 0.284                                           | 0.588                            | 894.94              | 526.10              | 0.167                            | 709.87              | 118.32              |
| A_68_P28137834 | chr11:112644282-112644326                         | NM_011448:781      | Sox9       | INSIDE                 | 0.578                                           | 0.511                            | 1460.42             | 745.79              | 0.295                            | 1178.99             | 347.99              |
| A_68_P28137844 | chr11:112645388-112645432                         | NM_011448:1887     | Sox9       | INSIDE                 | 0.338                                           | 0.507                            | 1581.52             | 801.59              | 0.171                            | 1241.06             | 212.67              |
| A_68_P28137851 | chr11:112646227-112646271                         | NM_011448:2725     | Sox9       | INSIDE                 | 0.652                                           | 0.476                            | 3114.77             | 1483.97             | 0.310                            | 2500.51             | 776.27              |
| A_68_P28137853 | chr11:112646459-112646503                         | NM_011448:2957     | Sox9       | INSIDE                 | 0.475                                           | 0.635                            | 5799.83             | 3681.65             | 0.302                            | 4110.70             | 1239.86             |
| A_68_P28137854 | chr11:112646538-112646582                         | NM_011448:3037     | Sox9       | INSIDE                 | 0.310                                           | 1.454                            | 16942.70            | 24640.93            | 0.451                            | 11286.38            | 5085.82             |
| A_68_P28137855 | chr11:112646610-112646655                         | NM_011448:3109     | Sox9       | INSIDE                 | 0.313                                           | 1.546                            | 7635.10             | 11803.18            | 0.484                            | 5030.24             | 2436.94             |
| A_68_P30497693 | chr15:102235932-102235976                         | NM_013672:-792     | Sp1        | PROMOTER               | 0.483                                           | 0.563                            | 1706.22             | 960.11              | 0.272                            | 1277.79             | 347.43              |
| A_68_P28047901 | chr11:96839052-96839100                           | NM_001080964:-74   | Sp2        | PROMOTER               | 0.096                                           | 2.050                            | 940.01              | 1927.24             | 0.198                            | 612.72              | 121.04              |
| A_68_P21328878 | chr2:72817077-72817121                            | NM_001098425:240   | Sp3        | INSIDE                 | 0.294                                           | 0.405                            | 3871.91             | 1567.02             | 0.119                            | 2908.63             | 345.72              |
| A_68_P21328890 | chr2:72819073-72819117                            | NM_001018042:-591  | Sp3        | PROMOTER               | 0.380                                           | 0.477                            | 1207.64             | 576.04              | 0.181                            | 1084.35             | 196.48              |
| A_68_P28778756 | chr12:119539812-119539856                         | NM_001166385:79    | Sp4        | INSIDE                 | 0.522                                           | 0.452                            | 1511.26             | 683.41              | 0.236                            | 1125.00             | 265.51              |
| A_68_P28778765 | chr12:119540713-119540757                         | NM_001166385:-821  | Sp4        | PROMOTER               | 0.315                                           | 0.479                            | 3913.42             | 1875.75             | 0.151                            | 2958.73             | 446.12              |
| A_68_P28048202 | chr11:96883898-96883943                           | NM_031183:9038     | Sp6        | INSIDE                 | 0.067                                           | 2.296                            | 2943.93             | 6759.36             | 0.154                            | 1974.68             | 304.04              |
| A_68_P30497455 | chr15:102189021-102189065                         | NM_130458:7660     | Sp7        | INSIDE                 | 0.633                                           | 0.631                            | 899.42              | 567.58              | 0.399                            | 732.98              | 292.80              |
| A_68_P28781843 | chr12:120081478-120081528                         | NM_177082:-3299    | Sp8        | PROMOTER               | 0.207                                           | 0.633                            | 1141.75             | 722.26              | 0.131                            | 945.26              | 123.88              |
| A_68_P28781844 | chr12:120081565-120081609                         | NM_177082:-3215    | Sp8        | PROMOTER               | 0.372                                           | 0.462                            | 2662.37             | 1228.89             | 0.172                            | 2012.03             | 345.67              |
| A_68_P21330516 | chr2:73110924-73110977                            | NM_001005343:968   | Sp9        | INSIDE                 | 0.236                                           | 0.599                            | 1160.10             | 694.45              | 0.142                            | 946.97              | 134.01              |
| A_68_P21330519 | chr2:73111290-73111334                            | NM_001005343:1330  | Sp9        | INSIDE                 | 0.525                                           | 0.451                            | 1831.50             | 826.07              | 0.237                            | 1456.82             | 345.17              |
| A_68_P21330529 | chr2:73112421-73112465                            | NM_001005343:2460  | Sp9        | INSIDE                 | 0.491                                           | 0.660                            | 3662.17             | 2418.17             | 0.324                            | 2776.38             | 899.26              |
| A_68_P27942517 | chr11:78114890-78114934                           | NM_017407:-180     | Spag5      | PROMOTER               | 0.240                                           | 0.552                            | 2688.70             | 1483.43             | 0.132                            | 2027.92             | 268.46              |
| A_68_P30570619 | chr16:16829103-16829147                           | NM_015773:332      | Spag6      | INSIDE                 | 0.155                                           | 0.527                            | 4089.76             | 2155.27             | 0.082                            | 3015.83             | 245.92              |
| A_68_P31351018 | chr17:74737917-74737961                           | NM_001162870:-388  | Spast      | PROMOTER               | 0.343                                           | 0.531                            | 1832.83             | 973.25              | 0.182                            | 1583.59             | 288.44              |
| A_68_P29645527 | chr14:61253344-61253393                           | NM_001033272:-197  | Spata13    | PROMOTER               | 0.219                                           | 1.637                            | 789.50              | 1292.71             | 0.358                            | 597.57              | 214.18              |
| A_68_P21835810 | chr2:167318513-167318557                          | NM_170756:-160     | Spata2     | PROMOTER               | 0.206                                           | 0.443                            | 2442.29             | 1082.11             | 0.091                            | 1742.88             | 158.77              |
| A_68_P28033247 | chr11:94347425-94347469                           | NM_144827:-822     | Spata20    | PROMOTER               | 0.467                                           | 0.635                            | 896.09              | 569.16              | 0.297                            | 743.17              | 220.44              |
| A_68_P20409777 | chr1:87914871-87914915                            | NM_027029:-3624    | Spata3     | PROMOTER               | 0.314                                           | 0.683                            | 2260.61             | 1543.56             | 0.215                            | 1734.78             | 372.44              |
| A_68_P23212277 | chr4:111392547-111392591                          | NM_026470:-46      | Spata6     | PROMOTER               | 0.579                                           | 0.722                            | 2450.04             | 1768.02             | 0.418                            | 1935.81             | 808.79              |
| A_68_P23212280 | chr4:111392824-111392869                          | NM_026470:232      | Spata6     | INSIDE                 | 0.490                                           | 0.438                            | 1747.77             | 766.17              | 0.215                            | 1483.13             | 318.46              |
| A_68_P28671225 | chr12:99866511-99866555                           | NM_178914:139      | Spata7     | INSIDE                 | 0.477                                           | 0.714                            | 2053.80             | 1466.08             | 0.341                            | 1525.59             | 519.84              |
| A_68_P30478329 | chr15:98956569-98956613                           | NM_139140:-685     | Spats2     | PROMOTER               | 0.259                                           | 0.401                            | 2401.18             | 963.44              | 0.104                            | 1683.67             | 175.17              |
| A_68_P20254931 | chr1:57831531-57831575                            | NM_144882:-152     | Spats21    | PROMOTER               | 0.232                                           | 0.580                            | 2911.19             | 1689.19             | 0.135                            | 2333.82             | 314.72              |
| A_68_P21307667 | chr2:69043827-69043871                            | NM_001199123:399   | Spe25      | INSIDE                 | 0.336                                           | 0.484                            | 1184.98             | 573.10              | 0.163                            | 914.60              | 148.81              |
| A_68_P27851931 | chr11:61890435-61890479                           | NM_001029936:-142  | Specc1     | PROMOTER               | 0.500                                           | 3.261                            | 4090.40             | 13339.98            | 1.631                            | 2596.31             | 4235.81             |
| A_68_P27255276 | chr10:74674681-74674725                           | NM_153406:-115     | Specc11    | PROMOTER               | 0.280                                           | 0.566                            | 2185.57             | 1237.33             | 0.158                            | 1688.67             | 267.56              |
| A_68_P20353582 | chr1:75371730-75371774                            | NM_007463:-119     | Speg       | DIVERGENT_PROMOTER     | 0.296                                           | 0.693                            | 2142.52             | 1484.62             | 0.205                            | 1623.95             | 333.44              |
| A_68_P20353638 | chr1:75379009-75379053                            | NM_001085370:-3154 | Speg       | PROMOTER               | 0.173                                           | 0.692                            | 7252.21             | 5019.83             | 0.120                            | 4874.62             | 583.64              |

| ProbeName      | Target position of probe on CpG island microarray | TargetID           | GeneSymbol | CpG island Description | Ratio of relative methylation (TiO2-NP/Vehicle) | Sham group                       |                     |                     | TiO <sub>2</sub> -H group        |                     |                     |
|----------------|---------------------------------------------------|--------------------|------------|------------------------|-------------------------------------------------|----------------------------------|---------------------|---------------------|----------------------------------|---------------------|---------------------|
|                |                                                   |                    |            |                        |                                                 | Relative methylation (Cy-5/Cy-3) | Cy-3 signal (Input) | Cy-5 signal (MeDIP) | Relative methylation (Cy-5/Cy-3) | Cy-3 signal (Input) | Cy-5 signal (MeDIP) |
| A_68_P20353660 | chr1:75381669-75381713                            | NM_001085370:494   | Speg       | PROMOTER               | 0.466                                           | 1.573                            | 5132.50             | 8074.70             | 0.733                            | 3395.55             | 2488.68             |
| A_68_P20353690 | chr1:75385333-75385377                            | NM_001085370:3170  | Speg       | INSIDE                 | 0.277                                           | 0.669                            | 2015.09             | 1348.33             | 0.185                            | 1596.50             | 296.11              |
| A_68_P20353933 | chr1:75419052-75419096                            | NM_001085370:36890 | Speg       | INSIDE                 | 0.514                                           | 0.669                            | 3596.88             | 2407.46             | 0.344                            | 2505.44             | 862.47              |
| A_68_P20353934 | chr1:75419154-75419198                            | NM_001085370:36992 | Speg       | INSIDE                 | 0.403                                           | 1.343                            | 4896.31             | 6574.99             | 0.541                            | 3345.01             | 1810.88             |
| A_68_P23364637 | chr4:141092753-141092798                          | NM_019763:1737     | Spen       | INSIDE                 | 0.207                                           | 0.516                            | 2508.16             | 1294.92             | 0.107                            | 1890.18             | 201.74              |
| A_68_P26587801 | chr9:65309057-65309101                            | NM_138584:335      | Spg21      | INSIDE                 | 0.145                                           | 0.610                            | 3316.04             | 2023.07             | 0.089                            | 2586.25             | 229.16              |
| A_68_P28159860 | chr11:116394577-116394621                         | NM_011451:-1455    | Sphk1      | PROMOTER               | 0.249                                           | 0.421                            | 1380.55             | 581.67              | 0.105                            | 1138.93             | 119.52              |
| A_68_P28159866 | chr11:116395212-116395256                         | NM_011451:-819     | Sphk1      | PROMOTER               | 0.333                                           | 0.717                            | 1422.35             | 1020.19             | 0.239                            | 1032.44             | 246.66              |
| A_68_P25094661 | chr7:52968968-52969012                            | NM_020011:1587     | Sphk2      | INSIDE                 | 0.662                                           | 2.561                            | 1056.76             | 2706.28             | 1.695                            | 892.29              | 1512.06             |
| A_68_P25094672 | chr7:52970422-52970466                            | NM_020011:133      | Sphk2      | INSIDE                 | 0.581                                           | 0.611                            | 1761.61             | 1077.13             | 0.355                            | 1348.74             | 479.06              |
| A_68_P25094675 | chr7:52970796-52970843                            | NM_020011:-242     | Sphk2      | PROMOTER               | 0.170                                           | 0.709                            | 1390.39             | 986.07              | 0.120                            | 974.67              | 117.26              |
| A_68_P25094689 | chr7:52973005-52973055                            | NM_020011:-2453    | Sphk2      | PROMOTER               | 0.221                                           | 0.394                            | 1649.80             | 650.58              | 0.087                            | 1387.81             | 120.90              |
| A_68_P30721030 | chr16:44347912-44347958                           | NM_144550:421      | Spice1     | INSIDE                 | 0.261                                           | 1.462                            | 1597.91             | 2336.91             | 0.381                            | 1233.66             | 470.42              |
| A_68_P25026345 | chr7:30066535-30066579                            | NM_001082548:440   | Spint2     | INSIDE                 | 0.550                                           | 0.718                            | 1768.27             | 1268.84             | 0.395                            | 1463.88             | 577.69              |
| A_68_P26239286 | chr8:125857009-125857053                          | NM_172287:418      | Spire2     | INSIDE                 | 0.437                                           | 0.417                            | 2644.30             | 1103.38             | 0.182                            | 2061.87             | 376.19              |
| A_68_P28555624 | chr12:77810657-77810701                           | NM_013675:856      | Spnb1      | INSIDE                 | 0.645                                           | 0.303                            | 2647.47             | 801.05              | 0.195                            | 2209.99             | 431.34              |
| A_68_P28555630 | chr12:77811318-77811362                           | NM_013675:194      | Spnb1      | INSIDE                 | 0.384                                           | 0.669                            | 1808.55             | 1209.90             | 0.257                            | 1421.57             | 365.08              |
| A_68_P28555634 | chr12:77811742-77811790                           | NM_013675:-232     | Spnb1      | PROMOTER               | 0.267                                           | 0.632                            | 901.05              | 569.83              | 0.169                            | 716.22              | 121.15              |
| A_68_P31924553 | chr19:4712434-4712478                             | NM_021287:1234     | Spnb3      | INSIDE                 | 0.450                                           | 0.671                            | 1349.97             | 905.28              | 0.302                            | 1028.50             | 310.31              |
| A_68_P31924554 | chr19:4712508-4712552                             | NM_021287:1308     | Spnb3      | INSIDE                 | 0.147                                           | 0.633                            | 2518.67             | 1593.51             | 0.093                            | 1762.68             | 164.01              |
| A_68_P31924555 | chr19:4712589-4712633                             | NM_021287:1388     | Spnb3      | INSIDE                 | 0.468                                           | 0.565                            | 1249.14             | 706.20              | 0.265                            | 1019.90             | 270.06              |
| A_68_P25016925 | chr7:28146852-28146896                            | NM_001199235:32651 | Spnb4      | INSIDE                 | 0.537                                           | 0.575                            | 1653.97             | 950.83              | 0.309                            | 1471.23             | 453.96              |
| A_68_P25017007 | chr7:28160302-28160347                            | NM_001199235:19201 | Spnb4      | INSIDE                 | 0.425                                           | 0.702                            | 1568.81             | 1101.78             | 0.298                            | 1289.57             | 384.55              |
| A_68_P27911821 | chr11:72302535-72302580                           | NM_153060:849      | Spns2      | INSIDE                 | 0.487                                           | 0.643                            | 1352.13             | 869.12              | 0.313                            | 1065.32             | 333.18              |
| A_68_P29070326 | chr13:58009122-58009166                           | NM_001166464:549   | Spock1     | INSIDE                 | 0.506                                           | 0.524                            | 1246.19             | 653.13              | 0.265                            | 1059.14             | 280.90              |
| A_68_P29070327 | chr13:58009211-58009255                           | NM_001166464:461   | Spock1     | INSIDE                 | 0.262                                           | 0.611                            | 949.70              | 580.03              | 0.160                            | 775.08              | 124.21              |
| A_68_P28038653 | chr11:95275248-95275292                           | NM_025287:-126     | Spop       | PROMOTER               | 0.638                                           | 2.705                            | 2310.60             | 6250.27             | 1.726                            | 1571.40             | 2712.43             |
| A_68_P24007309 | chr5:115462025-115462071                          | NM_029012:516      | Spp13      | INSIDE                 | 0.340                                           | 2.073                            | 1933.68             | 4008.61             | 0.705                            | 1553.83             | 1094.99             |
| A_68_P24603257 | chr6:85087734-85087778                            | NM_011467:2        | Spr        | INSIDE                 | 0.118                                           | 0.636                            | 1909.44             | 1213.74             | 0.075                            | 1589.35             | 119.51              |
| A_68_P21556051 | chr2:116946577-116946621                          | NM_033524:-587     | Spred1     | PROMOTER               | 0.334                                           | 0.440                            | 3528.51             | 1554.07             | 0.147                            | 2790.48             | 410.47              |
| A_68_P27628894 | chr11:19820464-19820508                           | NM_033523:-3958    | Spred2     | PROMOTER               | 0.665                                           | 2.904                            | 294.59              | 855.42              | 1.932                            | 379.16              | 732.65              |
| A_68_P27628921 | chr11:19825017-19825061                           | NM_033523:594      | Spred2     | INSIDE                 | 0.468                                           | 0.469                            | 4522.81             | 2122.40             | 0.220                            | 3561.26             | 781.88              |
| A_68_P29879699 | chr14:106294307-106294351                         | NM_011897:1708     | Spry2      | INSIDE                 | 0.273                                           | 0.616                            | 3758.28             | 2313.71             | 0.168                            | 2666.38             | 448.47              |
| A_68_P29879712 | chr14:106295768-106295812                         | NM_011897:246      | Spry2      | INSIDE                 | 0.577                                           | 0.442                            | 1487.24             | 657.86              | 0.255                            | 1204.45             | 307.63              |
| A_68_P29879718 | chr14:106296554-106296598                         | NM_011897:-540     | Spry2      | PROMOTER               | 0.214                                           | 0.522                            | 1234.23             | 643.73              | 0.111                            | 1053.87             | 117.43              |
| A_68_P30496206 | chr15:101966579-101966623                         | NM_001033277:46    | Spry3      | INSIDE                 | 0.151                                           | 0.345                            | 2743.26             | 945.31              | 0.052                            | 2330.38             | 121.35              |
| A_68_P30496207 | chr15:101966685-101966729                         | NM_001033277:-60   | Spry3      | DIVERGENT_PROMOTER     | 0.235                                           | 0.490                            | 1236.78             | 605.57              | 0.115                            | 1013.36             | 116.77              |
| A_68_P27540138 | chr10:127650212-127650256                         | NM_025716:-1384    | Spry4      | PROMOTER               | 0.460                                           | 0.631                            | 1205.34             | 761.02              | 0.290                            | 963.34              | 279.75              |
| A_68_P23403479 | chr4:149328561-149328605                          | NM_029035:533      | Spsb1      | INSIDE                 | 0.255                                           | 0.493                            | 1250.73             | 616.65              | 0.126                            | 927.62              | 116.73              |
| A_68_P24817040 | chr6:124755640-124755684                          | NM_013539:-3296    | Spsb2      | PROMOTER               | 0.314                                           | 0.475                            | 1229.87             | 584.16              | 0.149                            | 957.83              | 142.90              |
| A_68_P26750480 | chr9:96918879-96918923                            | NM_145134:-126     | Spsb4      | PROMOTER               | 0.348                                           | 0.445                            | 1561.18             | 694.96              | 0.155                            | 1344.12             | 208.26              |
| A_68_P28615264 | chr12:88640362-88640406                           | NM_011479:88796    | Spltc2     | DOWNSTREAM             | 0.260                                           | 0.742                            | 4012.53             | 2977.58             | 0.193                            | 2737.51             | 527.21              |
| A_68_P28615265 | chr12:88640437-88640481                           | NM_011479:88722    | Spltc2     | DOWNSTREAM             | 0.264                                           | 0.635                            | 3336.21             | 2118.25             | 0.167                            | 2605.01             | 436.06              |
| A_68_P28615271 | chr12:88641179-88641223                           | NM_011479:87980    | Spltc2     | DOWNSTREAM             | 0.299                                           | 0.614                            | 3622.78             | 2225.65             | 0.184                            | 2774.53             | 509.31              |

| ProbeName      | Target position of probe on CpG island microarray | TargetID           | GeneSymbol | CpG island Description | Ratio of relative methylation (TiO2-NP/Vehicle) | Sham group                       |                     |                     | TiO <sub>2</sub> -H group        |                     |                     |
|----------------|---------------------------------------------------|--------------------|------------|------------------------|-------------------------------------------------|----------------------------------|---------------------|---------------------|----------------------------------|---------------------|---------------------|
|                |                                                   |                    |            |                        |                                                 | Relative methylation (Cy-5/Cy-3) | Cy-3 signal (Input) | Cy-5 signal (MeDIP) | Relative methylation (Cy-5/Cy-3) | Cy-3 signal (Input) | Cy-5 signal (MeDIP) |
| A_68_P25102496 | chr7:54263191-54263240                            | NM_175318:569      | Spty2d1    | INSIDE                 | 0.259                                           | 0.641                            | 1605.62             | 1028.44             | 0.166                            | 1192.96             | 197.82              |
| A_68_P25102502 | chr7:54263847-54263895                            | NM_175318:-86      | Spty2d1    | PROMOTER               | 0.152                                           | 0.552                            | 1815.47             | 1001.40             | 0.084                            | 1421.04             | 119.51              |
| A_68_P25102503 | chr7:54263926-54263970                            | NM_175318:-164     | Spty2d1    | PROMOTER               | 0.372                                           | 0.709                            | 1940.59             | 1375.01             | 0.264                            | 1561.52             | 412.11              |
| A_68_P21587980 | chr2:122590894-122590938                          | NM_001162503:-178  | Sqrdl      | PROMOTER               | 0.348                                           | 0.511                            | 2170.79             | 1109.61             | 0.178                            | 1708.45             | 303.97              |
| A_68_P31415000 | chr17:86544304-86544360                           | NM_030133:183      | Srbd1      | INSIDE                 | 0.264                                           | 0.612                            | 954.25              | 583.60              | 0.162                            | 748.11              | 120.92              |
| A_68_P28051144 | chr11:97393113-97393157                           | NM_018873:43306    | Srcin1     | INSIDE                 | 0.210                                           | 0.620                            | 1230.03             | 762.31              | 0.130                            | 902.66              | 117.54              |
| A_68_P28051297 | chr11:97413036-97413080                           | NM_018873:23382    | Srcin1     | INSIDE                 | 0.623                                           | 0.633                            | 817.06              | 517.33              | 0.394                            | 635.78              | 250.71              |
| A_68_P28051299 | chr11:97413226-97413270                           | NM_018873:23192    | Srcin1     | INSIDE                 | 0.593                                           | 0.608                            | 889.92              | 541.50              | 0.361                            | 809.41              | 291.86              |
| A_68_P24118744 | chr5:136438405-136438449                          | NM_001160366:11920 | Srerb4d    | INSIDE                 | 0.114                                           | 0.543                            | 3947.13             | 2142.47             | 0.062                            | 2645.93             | 163.34              |
| A_68_P24118745 | chr5:136438525-136438569                          | NM_001160366:11800 | Srerb4d    | INSIDE                 | 0.663                                           | 0.660                            | 4244.66             | 2802.70             | 0.438                            | 3021.76             | 1323.39             |
| A_68_P29116718 | chr13:69749922-69749966                           | NM_175283:397      | Srd5a1     | INSIDE                 | 0.611                                           | 0.491                            | 1683.52             | 826.10              | 0.300                            | 1354.43             | 406.03              |
| A_68_P29116719 | chr13:69750004-69750048                           | NM_175283:315      | Srd5a1     | INSIDE                 | 0.499                                           | 0.542                            | 2348.08             | 1273.45             | 0.270                            | 1991.53             | 538.44              |
| A_68_P29116720 | chr13:69750085-69750129                           | NM_175283:235      | Srd5a1     | INSIDE                 | 0.294                                           | 0.327                            | 1824.07             | 596.40              | 0.096                            | 1215.67             | 116.70              |
| A_68_P29116723 | chr13:69750440-69750484                           | NM_175283:-121     | Srd5a1     | DIVERGENT_PROMOTER     | 0.244                                           | 0.533                            | 2400.14             | 1279.76             | 0.130                            | 1674.04             | 218.05              |
| A_68_P31349752 | chr17:74397147-74397191                           | NM_053188:88       | Srd5a2     | INSIDE                 | 0.271                                           | 0.405                            | 1263.86             | 512.28              | 0.110                            | 1087.52             | 119.43              |
| A_68_P27841612 | chr11:60024194-60024238                           | NM_011480:9890     | Srebfl     | INSIDE                 | 0.272                                           | 0.365                            | 1444.68             | 527.32              | 0.099                            | 1170.03             | 116.38              |
| A_68_P27841685 | chr11:60033832-60033876                           | NM_011480:252      | Srebfl     | INSIDE                 | 0.210                                           | 0.430                            | 1969.99             | 846.79              | 0.090                            | 1551.22             | 139.74              |
| A_68_P27841686 | chr11:60033953-60033997                           | NM_011480:132      | Srebfl     | INSIDE                 | 0.537                                           | 0.480                            | 1636.00             | 785.54              | 0.258                            | 1292.43             | 333.03              |
| A_68_P30381700 | chr15:81977560-81977604                           | NM_033218:-116     | Srebfl2    | PROMOTER               | 0.268                                           | 0.552                            | 1464.31             | 808.90              | 0.148                            | 1024.78             | 151.75              |
| A_68_P30381703 | chr15:81977883-81977927                           | NM_033218:206      | Srebfl2    | INSIDE                 | 0.122                                           | 0.735                            | 7136.20             | 5242.94             | 0.090                            | 4976.80             | 445.44              |
| A_68_P29286846 | chr13:104563824-104563877                         | NM_172592:-9188    | Srek1      | PROMOTER               | 0.193                                           | 0.570                            | 1311.67             | 747.61              | 0.110                            | 1110.43             | 122.08              |
| A_68_P29286848 | chr13:104564132-104564176                         | NM_172592:-9492    | Srek1      | PROMOTER               | 0.631                                           | 0.560                            | 1868.39             | 1046.08             | 0.354                            | 1663.54             | 588.15              |
| A_68_P29292646 | chr13:105607347-105607391                         | NM_026075:50       | Sreklip1   | INSIDE                 | 0.471                                           | 0.441                            | 1745.54             | 769.69              | 0.208                            | 1192.85             | 247.69              |
| A_68_P31207576 | chr17:46692058-46692102                           | NM_020493:1031     | Srf        | INSIDE                 | 0.623                                           | 0.725                            | 3690.55             | 2677.11             | 0.452                            | 2324.42             | 1050.17             |
| A_68_P31207578 | chr17:46692314-46692358                           | NM_020493:775      | Srf        | INSIDE                 | 0.158                                           | 0.667                            | 1514.02             | 1009.94             | 0.106                            | 1123.57             | 118.57              |
| A_68_P27506870 | chr10:121484975-121485019                         | NM_001081037:-747  | Srgap1     | PROMOTER               | 0.635                                           | 0.710                            | 1308.03             | 929.24              | 0.451                            | 1135.09             | 512.18              |
| A_68_P20616231 | chr1:133422247-133422291                          | NM_001081011:1670  | Srgap2     | INSIDE                 | 0.299                                           | 0.412                            | 2073.72             | 854.41              | 0.123                            | 1549.42             | 191.09              |
| A_68_P20616241 | chr1:133423301-133423345                          | NM_001081011:616   | Srgap2     | INSIDE                 | 0.269                                           | 0.467                            | 1393.83             | 650.69              | 0.125                            | 1000.15             | 125.44              |
| A_68_P20616242 | chr1:133423393-133423437                          | NM_001081011:524   | Srgap2     | INSIDE                 | 0.375                                           | 0.521                            | 2544.03             | 1324.36             | 0.195                            | 2056.63             | 401.09              |
| A_68_P20616246 | chr1:133423879-133423923                          | NM_001081011:38    | Srgap2     | INSIDE                 | 0.165                                           | 0.750                            | 5910.20             | 4432.85             | 0.123                            | 4115.64             | 507.99              |
| A_68_P23395328 | chr4:147965305-147965349                          | NM_009272:-295     | Srm        | PROMOTER               | 0.165                                           | 0.681                            | 2347.57             | 1598.71             | 0.112                            | 1660.23             | 186.30              |
| A_68_P31612300 | chr18:34490731-34490775                           | NM_025527:-46      | Srp19      | PROMOTER               | 0.246                                           | 0.570                            | 1033.65             | 589.20              | 0.140                            | 865.75              | 121.36              |
| A_68_P28158411 | chr11:116135230-116135274                         | NM_146032:279      | Srp68      | INSIDE                 | 0.158                                           | 1.446                            | 2201.26             | 3183.70             | 0.229                            | 1480.33             | 338.74              |
| A_68_P23819151 | chr5:77403818-77403862                            | NM_025691:115      | Srp72      | INSIDE                 | 0.315                                           | 0.455                            | 1208.35             | 549.44              | 0.143                            | 903.88              | 129.65              |
| A_68_P20885446 | chr1:184055324-184055368                          | NM_012058:479      | Srp9       | INSIDE                 | 0.272                                           | 0.440                            | 2506.19             | 1103.56             | 0.120                            | 2066.48             | 247.19              |
| A_68_P31123423 | chr17:28758242-28758293                           | NM_016795:1132     | Srpkl      | INSIDE                 | 0.170                                           | 0.582                            | 1647.29             | 959.35              | 0.099                            | 1251.97             | 123.87              |
| A_68_P31123424 | chr17:28758327-28758378                           | NM_016795:1047     | Srpkl      | INSIDE                 | 0.282                                           | 0.529                            | 1613.63             | 853.61              | 0.149                            | 1237.90             | 184.37              |
| A_68_P31123427 | chr17:28758620-28758664                           | NM_016795:757      | Srpkl      | INSIDE                 | 0.332                                           | 0.652                            | 2257.58             | 1471.67             | 0.217                            | 1739.13             | 376.59              |
| A_68_P26421279 | chr9:35018970-35019014                            | NM_026130:205      | Srpr       | INSIDE                 | 0.248                                           | 0.458                            | 1282.93             | 587.07              | 0.113                            | 1084.90             | 123.11              |
| A_68_P23328077 | chr4:134908288-134908332                          | NM_001130477:819   | Srrm1      | INSIDE                 | 0.329                                           | 0.459                            | 2385.61             | 1096.13             | 0.151                            | 1846.87             | 279.42              |
| A_68_P23328078 | chr4:134908468-134908512                          | NM_001130477:639   | Srrm1      | INSIDE                 | 0.298                                           | 0.722                            | 1561.86             | 1128.40             | 0.215                            | 1225.60             | 263.61              |
| A_68_P31093747 | chr17:23944056-23944100                           | NM_175229:3925     | Srrm2      | INSIDE                 | 0.467                                           | 1.416                            | 1224.30             | 1733.34             | 0.661                            | 1023.49             | 676.73              |
| A_68_P31093841 | chr17:23956616-23956662                           | NM_175229:16485    | Srrm2      | INSIDE                 | 0.659                                           | 2.506                            | 862.34              | 2161.44             | 1.652                            | 613.74              | 1013.66             |
| A_68_P24016052 | chr5:117041312-117041356                          | NM_026886:492      | Srrm4      | INSIDE                 | 0.243                                           | 0.597                            | 1087.61             | 649.40              | 0.145                            | 809.76              | 117.66              |



| ProbeName      | Target position of probe on CpG island microarray | TargetID           | GeneSymbol | CpG island Description | Ratio of relative methylation (TiO2-NP/Vehicle) | Sham group                       |                     |                     | TiO <sub>2</sub> -H group        |                     |                     |
|----------------|---------------------------------------------------|--------------------|------------|------------------------|-------------------------------------------------|----------------------------------|---------------------|---------------------|----------------------------------|---------------------|---------------------|
|                |                                                   |                    |            |                        |                                                 | Relative methylation (Cy-5/Cy-3) | Cy-3 signal (Input) | Cy-5 signal (MeDIP) | Relative methylation (Cy-5/Cy-3) | Cy-3 signal (Input) | Cy-5 signal (MeDIP) |
| A_68_P24125091 | chr5:137748534-137748578                          | NM_001109909:346   | Srrt       | INSIDE                 | 0.262                                           | 0.429                            | 3285.78             | 1408.74             | 0.112                            | 2266.19             | 254.16              |
| A_68_P27997502 | chr11:87860747-87860791                           | NM_001078167:404   | Srsf1      | PROMOTER               | 0.315                                           | 0.580                            | 1194.48             | 693.03              | 0.183                            | 953.83              | 174.32              |
| A_68_P23330841 | chr4:135411994-135412038                          | NM_001080387:10    | Srsf10     | INSIDE                 | 0.405                                           | 0.543                            | 2145.64             | 1166.05             | 0.220                            | 1597.74             | 351.61              |
| A_68_P23330845 | chr4:135412711-135412755                          | NM_001080387:726   | Srsf10     | INSIDE                 | 0.130                                           | 0.704                            | 2020.04             | 1421.74             | 0.091                            | 1484.32             | 135.30              |
| A_68_P22683258 | chr3:157694818-157694868                          | NM_001093753:-124  | Srsf11     | PROMOTER               | 0.339                                           | 0.643                            | 1098.09             | 706.04              | 0.218                            | 903.15              | 196.63              |
| A_68_P22825735 | chr4:33296468-33296513                            | NM_177774:525      | Srsf12     | INSIDE                 | 0.312                                           | 0.744                            | 2829.04             | 2105.95             | 0.232                            | 2326.52             | 540.72              |
| A_68_P28161646 | chr11:116714298-116714343                         | NM_011358:88       | Srsf2      | INSIDE                 | 0.225                                           | 0.417                            | 1703.04             | 710.00              | 0.094                            | 1296.28             | 121.79              |
| A_68_P28161648 | chr11:116714471-116714515                         | NM_011358:-84      | Srsf2      | DIVERGENT_PROMOTER     | 0.186                                           | 0.551                            | 1366.73             | 753.46              | 0.102                            | 1158.23             | 118.49              |
| A_68_P28578485 | chr12:82046655-82046699                           | NM_001079694:186   | Srsf5      | INSIDE                 | 0.183                                           | 0.392                            | 2396.97             | 939.51              | 0.072                            | 1897.39             | 136.07              |
| A_68_P31381748 | chr17:80606129-80606175                           | NM_001195485:493   | Srsf7      | INSIDE                 | 0.171                                           | 1.517                            | 4212.40             | 6389.69             | 0.260                            | 2651.26             | 689.30              |
| A_68_P31381751 | chr17:80606502-80606546                           | NM_001195485:121   | Srsf7      | INSIDE                 | 0.544                                           | 0.617                            | 1660.75             | 1024.34             | 0.335                            | 1280.02             | 429.18              |
| A_68_P31381753 | chr17:80606810-80606854                           | NM_001195485:-187  | Srsf7      | DIVERGENT_PROMOTER     | 0.191                                           | 0.533                            | 1673.20             | 891.30              | 0.102                            | 1304.47             | 132.97              |
| A_68_P21747680 | chr2:151931345-151931389                          | NM_029688:-99      | Srxn1      | PROMOTER               | 0.595                                           | 0.646                            | 2846.43             | 1838.72             | 0.385                            | 2308.07             | 887.70              |
| A_68_P21747681 | chr2:151931454-151931498                          | NM_029688:11       | Srxn1      | INSIDE                 | 0.551                                           | 0.690                            | 2167.54             | 1495.96             | 0.380                            | 1752.81             | 666.04              |
| A_68_P21901050 | chr2:179777293-179777337                          | NM_178750:127      | Ss1811     | INSIDE                 | 0.336                                           | 0.482                            | 2057.89             | 992.10              | 0.162                            | 1514.67             | 245.47              |
| A_68_P21311407 | chr2:69699641-69699685                            | NM_001110145:44    | Ssb        | INSIDE                 | 0.655                                           | 0.470                            | 1500.34             | 705.40              | 0.308                            | 1358.31             | 418.06              |
| A_68_P29218722 | chr13:91600765-91600809                           | NM_024186:85       | Ssbp2      | INSIDE                 | 0.112                                           | 0.614                            | 3203.40             | 1967.63             | 0.069                            | 2229.34             | 153.62              |
| A_68_P29218728 | chr13:91601752-91601796                           | NM_024186:1073     | Ssbp2      | INSIDE                 | 0.400                                           | 0.631                            | 1627.78             | 1026.95             | 0.252                            | 1284.93             | 323.86              |
| A_68_P23187158 | chr4:106584284-106584328                          | NM_023672:232      | Ssbp3      | INSIDE                 | 0.536                                           | 0.538                            | 1632.94             | 877.89              | 0.288                            | 1352.29             | 389.68              |
| A_68_P25952901 | chr8:73122626-73122673                            | NM_133772:9564     | Ssbp4      | INSIDE                 | 0.601                                           | 2.646                            | 2179.14             | 5766.93             | 1.591                            | 1340.71             | 2133.65             |
| A_68_P25952984 | chr8:73133754-73133798                            | NM_133772:-1563    | Ssbp4      | DIVERGENT_PROMOTER     | 0.165                                           | 0.728                            | 1875.54             | 1364.47             | 0.120                            | 1483.08             | 178.43              |
| A_68_P25952997 | chr8:73135574-73135625                            | NM_133772:-3386    | Ssbp4      | DIVERGENT_PROMOTER     | 0.236                                           | 0.521                            | 1205.98             | 627.73              | 0.123                            | 1006.37             | 123.76              |
| A_68_P24001332 | chr5:114443223-114443267                          | NM_198109:522      | Ssh1       | INSIDE                 | 0.587                                           | 0.614                            | 974.48              | 598.35              | 0.360                            | 898.80              | 323.69              |
| A_68_P27936387 | chr11:77029678-77029722                           | NM_177710:-226     | Ssh2       | PROMOTER               | 0.445                                           | 0.529                            | 1386.73             | 733.42              | 0.235                            | 1221.69             | 287.33              |
| A_68_P28957974 | chr13:38085985-38086029                           | NM_025965:53       | Ssr1       | INSIDE                 | 0.620                                           | 0.464                            | 1318.20             | 611.17              | 0.287                            | 1236.17             | 355.27              |
| A_68_P22199716 | chr3:65196136-65196183                            | NM_026155:316      | Ssr3       | INSIDE                 | 0.366                                           | 1.567                            | 1433.03             | 2244.91             | 0.573                            | 1122.68             | 643.02              |
| A_68_P22199717 | chr3:65196220-65196264                            | NM_026155:233      | Ssr3       | INSIDE                 | 0.169                                           | 0.720                            | 6823.25             | 4911.23             | 0.122                            | 5046.74             | 613.64              |
| A_68_P32464768 | chrX:71032322-71032366                            | NM_001166480:-22   | Ssr4       | DIVERGENT_PROMOTER     | 0.414                                           | 1.428                            | 2322.49             | 3316.10             | 0.591                            | 898.89              | 531.58              |
| A_68_P21395950 | chr2:84877269-84877313                            | NM_182990:-67      | Ssrp1      | DIVERGENT_PROMOTER     | 0.129                                           | 0.655                            | 4429.49             | 2899.56             | 0.084                            | 3164.63             | 267.09              |
| A_68_P21395951 | chr2:84877360-84877404                            | NM_001136081:-225  | Ssrp1      | PROMOTER               | 0.514                                           | 0.739                            | 3665.82             | 2709.21             | 0.380                            | 2642.53             | 1004.21             |
| A_68_P21395954 | chr2:84877657-84877701                            | NM_001136081:71    | Ssrp1      | INSIDE                 | 0.579                                           | 0.680                            | 1147.42             | 780.43              | 0.394                            | 841.63              | 331.42              |
| A_68_P21395956 | chr2:84877845-84877892                            | NM_001136081:261   | Ssrp1      | INSIDE                 | 0.163                                           | 1.640                            | 519.38              | 851.92              | 0.268                            | 445.15              | 119.23              |
| A_68_P31930503 | chr19:5731362-5731406                             | NM_020491:337      | Sssea1     | INSIDE                 | 0.440                                           | 0.723                            | 2204.80             | 1595.08             | 0.318                            | 1671.91             | 531.85              |
| A_68_P31930504 | chr19:5731477-5731521                             | NM_020491:223      | Sssea1     | INSIDE                 | 0.543                                           | 0.578                            | 1028.03             | 593.89              | 0.314                            | 770.02              | 241.55              |
| A_68_P31930506 | chr19:5731655-5731699                             | NM_020491:45       | Sssea1     | INSIDE                 | 0.474                                           | 0.485                            | 2931.98             | 1423.06             | 0.230                            | 2146.46             | 493.78              |
| A_68_P28466194 | chr12:59314126-59314170                           | NM_009216:1358     | Sstr1      | INSIDE                 | 0.266                                           | 0.523                            | 1498.91             | 784.15              | 0.139                            | 1114.45             | 155.35              |
| A_68_P28143023 | chr11:113480461-113480507                         | NM_001042606:-5086 | Sstr2      | PROMOTER               | 0.252                                           | 0.400                            | 1490.33             | 595.89              | 0.101                            | 1226.66             | 123.47              |
| A_68_P21729941 | chr2:148220875-148220919                          | NM_009219:-216     | Sstr4      | PROMOTER               | 0.375                                           | 0.598                            | 880.40              | 526.78              | 0.224                            | 729.88              | 163.82              |
| A_68_P21729944 | chr2:148221334-148221378                          | NM_009219:244      | Sstr4      | INSIDE                 | 0.211                                           | 0.419                            | 1936.96             | 811.30              | 0.088                            | 1419.29             | 125.50              |
| A_68_P30377732 | chr15:81229723-81229767                           | NM_133726:380      | St13       | INSIDE                 | 0.482                                           | 0.642                            | 1394.93             | 895.13              | 0.309                            | 1246.24             | 385.22              |
| A_68_P30377735 | chr15:81230102-81230146                           | NM_133726:0        | St13       | INSIDE                 | 0.283                                           | 0.741                            | 7066.61             | 5237.90             | 0.210                            | 4964.21             | 1042.96             |
| A_68_P30377736 | chr15:81230239-81230283                           | NM_133726:-136     | St13       | DIVERGENT_PROMOTER     | 0.511                                           | 0.636                            | 1652.89             | 1051.20             | 0.325                            | 1243.42             | 404.08              |
| A_68_P30296502 | chr15:67007203-67007248                           | NM_009177:1219     | St3gal1    | INSIDE                 | 0.096                                           | 0.590                            | 2928.70             | 1727.49             | 0.057                            | 2120.27             | 120.20              |
| A_68_P30296503 | chr15:67007295-67007349                           | NM_009177:1122     | St3gal1    | INSIDE                 | 0.192                                           | 0.628                            | 1380.77             | 867.23              | 0.121                            | 989.96              | 119.33              |

| ProbeName      | Target position of probe on CpG island microarray | TargetID          | GeneSymbol | CpG island Description | Ratio of relative methylation (TiO2-NP/Vehicle) | Sham group                       |                     |                     | TiO <sub>2</sub> -H group        |                     |                     |
|----------------|---------------------------------------------------|-------------------|------------|------------------------|-------------------------------------------------|----------------------------------|---------------------|---------------------|----------------------------------|---------------------|---------------------|
|                |                                                   |                   |            |                        |                                                 | Relative methylation (Cy-5/Cy-3) | Cy-3 signal (Input) | Cy-5 signal (MeDIP) | Relative methylation (Cy-5/Cy-3) | Cy-3 signal (Input) | Cy-5 signal (MeDIP) |
| A_68_P30296504 | chr15:67007424-67007469                           | NM_009177:998     | St3gal1    | INSIDE                 | 0.129                                           | 0.738                            | 3133.21             | 2312.57             | 0.095                            | 2072.70             | 197.79              |
| A_68_P30296506 | chr15:67007655-67007699                           | NM_009177:768     | St3gal1    | INSIDE                 | 0.267                                           | 0.461                            | 1360.77             | 627.89              | 0.123                            | 996.11              | 122.60              |
| A_68_P30296519 | chr15:67008963-67009007                           | NM_009177:-540    | St3gal1    | PROMOTER               | 0.234                                           | 1.397                            | 6262.09             | 8746.16             | 0.327                            | 3972.83             | 1297.23             |
| A_68_P26165834 | chr8:113494088-113494132                          | NM_009179:50346   | St3gal2    | INSIDE                 | 0.398                                           | 0.677                            | 1222.12             | 827.61              | 0.269                            | 901.87              | 242.81              |
| A_68_P23238475 | chr4:117807044-117807088                          | NM_009176:429     | St3gal3    | INSIDE                 | 0.116                                           | 0.714                            | 2675.68             | 1910.93             | 0.083                            | 2011.02             | 166.26              |
| A_68_P30792107 | chr16:58523074-58523118                           | NM_018784:329     | St3gal6    | INSIDE                 | 0.543                                           | 0.578                            | 1177.04             | 680.78              | 0.314                            | 897.75              | 281.89              |
| A_68_P28160910 | chr11:116555525-116555569                         | NM_009180:428     | St6galnac2 | INSIDE                 | 0.224                                           | 0.553                            | 1129.88             | 624.68              | 0.124                            | 965.65              | 119.80              |
| A_68_P21116356 | chr2:32462749-32462793                            | NM_001025310:290  | St6galnac6 | INSIDE                 | 0.653                                           | 0.443                            | 2138.72             | 946.90              | 0.289                            | 1637.68             | 473.42              |
| A_68_P22393610 | chr3:104667906-104667950                          | NM_153091:-70     | St71       | DIVERGENT_PROMOTER     | 0.465                                           | 0.373                            | 1659.75             | 618.42              | 0.173                            | 1471.45             | 254.75              |
| A_68_P24907674 | chr6:142912449-142912500                          | NM_011374:498     | St8sia1    | INSIDE                 | 0.206                                           | 0.641                            | 1077.96             | 690.69              | 0.132                            | 910.95              | 120.33              |
| A_68_P24907678 | chr6:142912941-142912985                          | NM_011374:10      | St8sia1    | INSIDE                 | 0.512                                           | 4.197                            | 2260.30             | 9487.15             | 2.149                            | 1804.81             | 3878.40             |
| A_68_P25232260 | chr7:81157728-81157772                            | NM_009181:818     | St8sia2    | INSIDE                 | 0.155                                           | 0.486                            | 2003.93             | 974.16              | 0.075                            | 1564.10             | 117.54              |
| A_68_P25232261 | chr7:81157848-81157892                            | NM_009181:698     | St8sia2    | INSIDE                 | 0.253                                           | 0.679                            | 2235.50             | 1518.32             | 0.172                            | 1503.65             | 257.94              |
| A_68_P25232272 | chr7:81159033-81159078                            | NM_009181:-487    | St8sia2    | PROMOTER               | 0.593                                           | 0.522                            | 3343.28             | 1744.06             | 0.310                            | 2614.63             | 809.38              |
| A_68_P31774240 | chr18:64425610-64425654                           | NM_009182:11620   | St8sia3    | INSIDE                 | 0.464                                           | 0.426                            | 2867.14             | 1221.38             | 0.198                            | 2108.09             | 416.43              |
| A_68_P20464815 | chr1:97564271-97564315                            | NM_009183:-121    | St8sia4    | PROMOTER               | 0.263                                           | 0.602                            | 3080.86             | 1854.12             | 0.158                            | 2195.52             | 347.78              |
| A_68_P31846732 | chr18:77493370-77493414                           | NM_013666:68807   | St8sia5    | INSIDE                 | 0.649                                           | 2.348                            | 2710.63             | 6364.55             | 1.524                            | 1865.98             | 2843.82             |
| A_68_P21018168 | chr2:13714756-13714800                            | NM_145838:369     | St8sia6    | INSIDE                 | 0.350                                           | 0.542                            | 2894.52             | 1568.46             | 0.190                            | 2206.39             | 418.34              |
| A_68_P28054167 | chr11:97913713-97913757                           | NM_146028:1042    | Stac2      | INSIDE                 | 0.380                                           | 0.687                            | 2016.37             | 1385.58             | 0.261                            | 1470.46             | 384.09              |
| A_68_P28054175 | chr11:97914595-97914639                           | NM_146028:160     | Stac2      | INSIDE                 | 0.433                                           | 0.528                            | 3682.99             | 1946.43             | 0.229                            | 2753.77             | 630.78              |
| A_68_P26770646 | chr9:100543212-100543261                          | NM_009282:-805    | Stag1      | PROMOTER               | 0.207                                           | 0.547                            | 1360.75             | 744.75              | 0.113                            | 1029.76             | 116.60              |
| A_68_P26770648 | chr9:100543417-100543473                          | NM_009282:-597    | Stag1      | PROMOTER               | 0.290                                           | 0.551                            | 990.61              | 545.74              | 0.160                            | 756.42              | 120.75              |
| A_68_P32341131 | chrX:39503134-39503178                            | NM_021465:-721    | Stag2      | PROMOTER               | 0.117                                           | 1.760                            | 3510.26             | 6179.39             | 0.206                            | 1499.73             | 308.32              |
| A_68_P21221438 | chr2:52601606-52601650                            | NM_019667:-445    | Stam2      | PROMOTER               | 0.373                                           | 0.581                            | 1188.08             | 689.77              | 0.217                            | 877.37              | 190.01              |
| A_68_P21221439 | chr2:52601733-52601777                            | NM_019667:-571    | Stam2      | PROMOTER               | 0.157                                           | 0.671                            | 1572.17             | 1054.98             | 0.105                            | 1138.67             | 119.99              |
| A_68_P32078821 | chr19:34266845-34266890                           | NM_029682:108     | Stamp11    | INSIDE                 | 0.104                                           | 2.001                            | 2573.12             | 5149.74             | 0.208                            | 1651.50             | 343.86              |
| A_68_P25372612 | chr7:108470032-108470076                          | NM_019990:222     | Stard10    | INSIDE                 | 0.119                                           | 0.634                            | 1962.15             | 1244.37             | 0.075                            | 1567.90             | 118.15              |
| A_68_P25372613 | chr7:108470115-108470159                          | NM_019990:304     | Stard10    | INSIDE                 | 0.602                                           | 0.601                            | 1988.33             | 1195.02             | 0.362                            | 1657.57             | 599.40              |
| A_68_P28055911 | chr11:98219606-98219650                           | NM_021547:-69     | Stard3     | PROMOTER               | 0.589                                           | 0.669                            | 1966.85             | 1314.93             | 0.394                            | 1854.60             | 730.57              |
| A_68_P31606709 | chr18:33373631-33373675                           | NM_133774:-182    | Stard4     | PROMOTER               | 0.278                                           | 0.506                            | 1136.21             | 575.08              | 0.141                            | 878.34              | 123.59              |
| A_68_P31809752 | chr18:70632290-70632335                           | NM_029019:114     | Stard6     | INSIDE                 | 0.101                                           | 1.505                            | 1184.65             | 1783.13             | 0.151                            | 786.22              | 119.10              |
| A_68_P21612443 | chr2:127096615-127096659                          | NM_139308:672     | Stard7     | INSIDE                 | 0.234                                           | 0.575                            | 2492.29             | 1433.71             | 0.135                            | 2089.87             | 281.79              |
| A_68_P28071037 | chr11:100800754-100800798                         | NM_011486:49      | Stat3      | INSIDE                 | 0.372                                           | 0.701                            | 1543.79             | 1082.81             | 0.261                            | 1181.06             | 307.97              |
| A_68_P28070587 | chr11:100721732-100721776                         | NM_001164062:-43  | Stat5a     | PROMOTER               | 0.204                                           | 0.531                            | 1426.91             | 758.02              | 0.108                            | 1076.18             | 116.36              |
| A_68_P28070590 | chr11:100721997-100722041                         | NM_001164062:221  | Stat5a     | INSIDE                 | 0.293                                           | 0.592                            | 1196.98             | 709.14              | 0.173                            | 945.49              | 164.00              |
| A_68_P21833056 | chr2:166821240-166821285                          | NM_001109905:516  | Stau1      | INSIDE                 | 0.570                                           | 0.595                            | 1196.97             | 711.91              | 0.339                            | 986.92              | 334.35              |
| A_68_P21833062 | chr2:166821989-166822037                          | NM_001109905:-234 | Stau1      | PROMOTER               | 0.166                                           | 0.659                            | 1422.26             | 937.41              | 0.110                            | 1113.63             | 122.03              |
| A_68_P27682712 | chr11:31269004-31269048                           | NM_011491:1035    | Stc2       | INSIDE                 | 0.410                                           | 0.590                            | 897.61              | 529.27              | 0.242                            | 837.64              | 202.36              |
| A_68_P27682716 | chr11:31269467-31269511                           | NM_011491:573     | Stc2       | INSIDE                 | 0.560                                           | 0.561                            | 1058.09             | 594.10              | 0.314                            | 903.97              | 284.24              |
| A_68_P27682732 | chr11:31271512-31271556                           | NM_011491:-1473   | Stc2       | PROMOTER               | 0.664                                           | 0.474                            | 2672.53             | 1266.60             | 0.315                            | 1977.73             | 622.37              |
| A_68_P27682733 | chr11:31271650-31271694                           | NM_011491:-1611   | Stc2       | PROMOTER               | 0.253                                           | 0.472                            | 1361.46             | 642.53              | 0.120                            | 1033.56             | 123.55              |
| A_68_P27689370 | chr11:32433541-32433585                           | NM_009288:297     | Stk10      | INSIDE                 | 0.563                                           | 0.618                            | 1245.10             | 768.86              | 0.348                            | 942.19              | 327.51              |
| A_68_P27281036 | chr10:79578010-79578054                           | NM_011492:-1248   | Stk11      | PROMOTER               | 0.199                                           | 0.605                            | 1344.72             | 813.44              | 0.120                            | 959.33              | 115.55              |
| A_68_P27281037 | chr10:79578104-79578148                           | NM_011492:-1154   | Stk11      | PROMOTER               | 0.649                                           | 0.530                            | 1828.89             | 969.27              | 0.344                            | 1251.59             | 430.62              |

| ProbeName      | Target position of probe on CpG island microarray | TargetID          | GeneSymbol | CpG island Description | Ratio of relative methylation (TiO2-NP/Vehicle) | Sham group                       |                     |                     | TiO <sub>2</sub> -H group        |                     |                     |
|----------------|---------------------------------------------------|-------------------|------------|------------------------|-------------------------------------------------|----------------------------------|---------------------|---------------------|----------------------------------|---------------------|---------------------|
|                |                                                   |                   |            |                        |                                                 | Relative methylation (Cy-5/Cy-3) | Cy-3 signal (Input) | Cy-5 signal (MeDIP) | Relative methylation (Cy-5/Cy-3) | Cy-3 signal (Input) | Cy-5 signal (MeDIP) |
| A_68_P27281038 | chr10:79578186-79578230                           | NM_011492:-1072   | Stk11      | PROMOTER               | 0.341                                           | 0.659                            | 910.75              | 600.38              | 0.225                            | 707.91              | 159.15              |
| A_68_P20354640 | chr1:75518210-75518265                            | NM_027886:134     | Stk11ip    | INSIDE                 | 0.164                                           | 0.460                            | 2161.70             | 993.42              | 0.076                            | 1600.44             | 120.99              |
| A_68_P20352666 | chr1:75207636-75207680                            | NM_011494:255     | Stk16      | INSIDE                 | 0.350                                           | 0.663                            | 1477.59             | 979.32              | 0.232                            | 1157.58             | 268.18              |
| A_68_P20233542 | chr1:53841734-53841778                            | NM_133810:303     | Stk17b     | INSIDE                 | 0.637                                           | 0.424                            | 1870.82             | 793.03              | 0.270                            | 1607.60             | 433.96              |
| A_68_P31156002 | chr17:34973346-34973390                           | NM_019442:480     | Stk19      | INSIDE                 | 0.544                                           | 0.616                            | 1454.28             | 895.82              | 0.335                            | 1323.89             | 444.02              |
| A_68_P20456743 | chr1:95532366-95532410                            | NM_021537:-84     | Stk25      | PROMOTER               | 0.258                                           | 0.638                            | 1464.50             | 934.08              | 0.165                            | 1204.52             | 198.39              |
| A_68_P20456744 | chr1:95532440-95532484                            | NM_021537:-158    | Stk25      | PROMOTER               | 0.240                                           | 0.551                            | 2664.75             | 1468.30             | 0.132                            | 1994.89             | 264.16              |
| A_68_P30132016 | chr15:35085389-35085433                           | NM_019635:151     | Stk3       | INSIDE                 | 0.212                                           | 0.427                            | 2475.64             | 1056.78             | 0.091                            | 1865.54             | 168.98              |
| A_68_P30132017 | chr15:35085586-35085630                           | NM_019635:-47     | Stk3       | PROMOTER               | 0.295                                           | 0.488                            | 4603.04             | 2246.98             | 0.144                            | 3782.78             | 544.91              |
| A_68_P28740640 | chr12:112082039-112082083                         | NM_011973:-2911   | Stk30      | DIVERGENT_PROMOTER     | 0.498                                           | 0.699                            | 1298.54             | 908.06              | 0.348                            | 1025.62             | 356.89              |
| A_68_P25576304 | chr7:146373808-146373852                          | NM_021302:563     | Stk32c     | INSIDE                 | 0.370                                           | 0.526                            | 1714.22             | 901.08              | 0.195                            | 1413.47             | 274.93              |
| A_68_P25576402 | chr7:146399285-146399329                          | NM_001162540:-100 | Stk32c     | PROMOTER               | 0.323                                           | 0.472                            | 2110.43             | 995.44              | 0.152                            | 1549.76             | 236.26              |
| A_68_P21626533 | chr2:129625984-129626034                          | NM_001038635:-244 | Stk35      | PROMOTER               | 0.131                                           | 0.624                            | 2138.25             | 1333.29             | 0.082                            | 1454.08             | 118.73              |
| A_68_P21626534 | chr2:129626071-129626115                          | NM_001038635:-160 | Stk35      | PROMOTER               | 0.217                                           | 0.676                            | 1252.10             | 846.38              | 0.146                            | 905.72              | 132.61              |
| A_68_P21626535 | chr2:129626154-129626199                          | NM_001038635:-76  | Stk35      | PROMOTER               | 0.229                                           | 0.638                            | 1788.07             | 1140.54             | 0.146                            | 1277.63             | 186.81              |
| A_68_P31125470 | chr17:29144780-29144824                           | NM_134115:80      | Stk38      | INSIDE                 | 0.339                                           | 0.543                            | 1290.56             | 700.74              | 0.184                            | 959.77              | 176.47              |
| A_68_P21303499 | chr2:68309684-68309728                            | NM_016866:332     | Stk39      | INSIDE                 | 0.577                                           | 0.458                            | 1598.00             | 731.37              | 0.264                            | 1365.24             | 360.73              |
| A_68_P21815998 | chr2:163900092-163900136                          | NM_021420:201     | Stk4       | INSIDE                 | 0.616                                           | 0.425                            | 1468.72             | 623.74              | 0.262                            | 1215.31             | 317.93              |
| A_68_P23322939 | chr4:134024154-134024198                          | NM_019641:-58     | Stmn1      | PROMOTER               | 0.248                                           | 0.677                            | 1098.48             | 743.38              | 0.168                            | 909.59              | 152.39              |
| A_68_P23322943 | chr4:134024577-134024621                          | NM_019641:364     | Stmn1      | INSIDE                 | 0.156                                           | 0.645                            | 2161.19             | 1392.93             | 0.100                            | 1533.24             | 153.95              |
| A_68_P21133064 | chr2:35192370-35192414                            | NM_013515:137     | Stom       | INSIDE                 | 0.160                                           | 0.652                            | 1567.37             | 1021.47             | 0.104                            | 1175.73             | 122.53              |
| A_68_P22869602 | chr4:43044144-43044188                            | NM_023231:90      | Stoml2     | INSIDE                 | 0.375                                           | 0.633                            | 1196.06             | 757.30              | 0.237                            | 941.35              | 223.35              |
| A_68_P28635988 | chr12:92885896-92885940                           | NM_175367:138958  | Ston2      | INSIDE                 | 0.548                                           | 2.984                            | 964.38              | 2877.66             | 1.635                            | 863.57              | 1412.37             |
| A_68_P25840857 | chr8:48373280-48373324                            | NM_001114311:1454 | Stox2      | INSIDE                 | 0.174                                           | 0.625                            | 1857.49             | 1160.78             | 0.108                            | 1276.11             | 138.37              |
| A_68_P25840860 | chr8:48373600-48373648                            | NM_001114311:1132 | Stox2      | INSIDE                 | 0.175                                           | 0.512                            | 1732.66             | 887.09              | 0.090                            | 1330.12             | 119.39              |
| A_68_P25840861 | chr8:48373757-48373801                            | NM_001114311:978  | Stox2      | INSIDE                 | 0.265                                           | 0.530                            | 3849.13             | 2041.53             | 0.141                            | 3167.91             | 445.20              |
| A_68_P28186320 | chr11:120574795-120574839                         | NM_016665:265     | Stra13     | INSIDE                 | 0.304                                           | 0.653                            | 1701.86             | 1111.63             | 0.199                            | 1269.57             | 252.10              |
| A_68_P28186321 | chr11:120574903-120574948                         | NM_016665:156     | Stra13     | INSIDE                 | 0.177                                           | 0.546                            | 3576.16             | 1952.29             | 0.096                            | 2694.71             | 259.95              |
| A_68_P28186322 | chr11:120575013-120575057                         | NM_016665:47      | Stra13     | INSIDE                 | 0.247                                           | 0.477                            | 2062.63             | 984.56              | 0.118                            | 1300.03             | 153.53              |
| A_68_P28100097 | chr11:106055038-106055082                         | NM_028126:-198    | Strada     | PROMOTER               | 0.276                                           | 0.564                            | 2868.73             | 1617.07             | 0.156                            | 2206.11             | 343.13              |
| A_68_P24880085 | chr6:137683395-137683454                          | NM_011499:-178    | Strap      | PROMOTER               | 0.191                                           | 0.550                            | 1376.24             | 757.23              | 0.105                            | 1134.99             | 119.24              |
| A_68_P24880090 | chr6:137684038-137684082                          | NM_011499:458     | Strap      | INSIDE                 | 0.402                                           | 0.565                            | 2008.73             | 1135.59             | 0.227                            | 1503.42             | 341.29              |
| A_68_P31373355 | chr17:79135650-79135694                           | NM_011500:228     | Strn       | INSIDE                 | 0.256                                           | 0.648                            | 2416.13             | 1566.20             | 0.166                            | 1760.83             | 292.30              |
| A_68_P26426682 | chr9:36575102-36575146                            | NM_008408:39      | Stt3a      | INSIDE                 | 0.277                                           | 0.596                            | 1931.40             | 1150.44             | 0.165                            | 1437.89             | 237.04              |
| A_68_P26426686 | chr9:36575536-36575582                            | NM_008408:-395    | Stt3a      | PROMOTER               | 0.132                                           | 0.475                            | 2701.04             | 1283.39             | 0.063                            | 1951.49             | 122.58              |
| A_68_P31106579 | chr17:25969550-25969594                           | NM_019719:734     | Stub1      | INSIDE                 | 0.309                                           | 0.732                            | 2880.62             | 2110.02             | 0.227                            | 2057.03             | 466.08              |
| A_68_P31106580 | chr17:25969693-25969737                           | NM_019719:592     | Stub1      | INSIDE                 | 0.149                                           | 0.531                            | 2140.17             | 1135.90             | 0.079                            | 1526.64             | 120.86              |
| A_68_P31106586 | chr17:25970234-25970278                           | NM_019719:50      | Stub1      | INSIDE                 | 0.574                                           | 0.606                            | 1580.31             | 957.97              | 0.348                            | 1193.25             | 415.48              |
| A_68_P31106589 | chr17:25970569-25970614                           | NM_019719:-285    | Stub1      | PROMOTER               | 0.600                                           | 0.508                            | 1234.01             | 627.21              | 0.305                            | 958.01              | 291.94              |
| A_68_P23616976 | chr5:38430129-38430184                            | NM_026959:-317    | Stx18      | PROMOTER               | 0.262                                           | 0.520                            | 1055.52             | 548.62              | 0.136                            | 867.02              | 117.95              |
| A_68_P23616979 | chr5:38430477-38430521                            | NM_026959:25      | Stx18      | INSIDE                 | 0.236                                           | 0.529                            | 2805.20             | 1483.16             | 0.125                            | 2117.72             | 264.34              |
| A_68_P23616980 | chr5:38430589-38430633                            | NM_026959:137     | Stx18      | INSIDE                 | 0.176                                           | 0.537                            | 1651.76             | 887.73              | 0.095                            | 1235.71             | 117.17              |
| A_68_P24114328 | chr5:135499558-135499602                          | NM_016801:139     | Stx1a      | INSIDE                 | 0.512                                           | 0.650                            | 1259.02             | 818.09              | 0.333                            | 1013.75             | 337.49              |
| A_68_P24114432 | chr5:135517814-135517858                          | NM_016801:18395   | Stx1a      | INSIDE                 | 0.446                                           | 1.396                            | 2378.55             | 3320.29             | 0.623                            | 1640.68             | 1022.52             |

| ProbeName      | Target position of probe on CpG island microarray | TargetID         | GeneSymbol | CpG island Description | Ratio of relative methylation (TiO2-NP/Vehicle) | Sham group                       |                     |                     | TiO <sub>2</sub> -H group        |                     |                     |
|----------------|---------------------------------------------------|------------------|------------|------------------------|-------------------------------------------------|----------------------------------|---------------------|---------------------|----------------------------------|---------------------|---------------------|
|                |                                                   |                  |            |                        |                                                 | Relative methylation (Cy-5/Cy-3) | Cy-3 signal (Input) | Cy-5 signal (MeDIP) | Relative methylation (Cy-5/Cy-3) | Cy-3 signal (Input) | Cy-5 signal (MeDIP) |
| A_68_P24114433 | chr5:135517901-135517945                          | NM_016801:18481  | Stx1a      | INSIDE                 | 0.196                                           | 1.446                            | 2560.20             | 3703.22             | 0.283                            | 1720.37             | 487.41              |
| A_68_P24114434 | chr5:135517995-135518039                          | NM_016801:18575  | Stx1a      | INSIDE                 | 0.233                                           | 2.067                            | 2582.59             | 5339.45             | 0.482                            | 1589.18             | 766.62              |
| A_68_P31958008 | chr19:11892927-11892972                           | NM_011502:434    | Stx3       | INSIDE                 | 0.213                                           | 0.548                            | 1367.45             | 749.55              | 0.117                            | 1038.29             | 121.12              |
| A_68_P31958015 | chr19:11893696-11893748                           | NM_011502:-339   | Stx3       | PROMOTER               | 0.274                                           | 0.644                            | 895.93              | 577.08              | 0.176                            | 690.83              | 121.89              |
| A_68_P25507645 | chr7:134985062-134985106                          | NM_009294:-237   | Stx4a      | PROMOTER               | 0.287                                           | 0.454                            | 1433.00             | 651.08              | 0.130                            | 1154.76             | 150.48              |
| A_68_P25507650 | chr7:134985680-134985724                          | NM_009294:381    | Stx4a      | INSIDE                 | 0.284                                           | 0.495                            | 1378.96             | 682.77              | 0.140                            | 986.11              | 138.42              |
| A_68_P25507651 | chr7:134985781-134985825                          | NM_009294:481    | Stx4a      | INSIDE                 | 0.513                                           | 0.509                            | 1031.52             | 524.89              | 0.261                            | 745.01              | 194.56              |
| A_68_P20736172 | chr1:157005611-157005658                          | NM_021433:-198   | Stx6       | PROMOTER               | 0.321                                           | 0.538                            | 1076.13             | 578.77              | 0.173                            | 864.75              | 149.38              |
| A_68_P27006965 | chr10:23869254-23869298                           | NM_016797:154    | Stx7       | INSIDE                 | 0.338                                           | 0.311                            | 1938.48             | 603.50              | 0.105                            | 1686.79             | 177.73              |
| A_68_P21117852 | chr2:32701638-32701686                            | NM_009295:1090   | Stxbp1     | INSIDE                 | 0.231                                           | 0.465                            | 1469.55             | 683.45              | 0.108                            | 1104.27             | 118.87              |
| A_68_P28012997 | chr11:90499182-90499226                           | NM_011505:218    | Stxbp4     | INSIDE                 | 0.657                                           | 0.648                            | 1058.56             | 686.34              | 0.426                            | 718.26              | 306.10              |
| A_68_P30680167 | chr16:37384851-37384895                           | NM_001114611:172 | Stxbp51    | INSIDE                 | 0.566                                           | 0.629                            | 1870.26             | 1176.79             | 0.356                            | 1586.46             | 565.03              |
| A_68_P28402110 | chr12:46174903-46174947                           | NM_144552:546    | Stxbp6     | INSIDE                 | 0.223                                           | 0.691                            | 2217.95             | 1531.70             | 0.154                            | 1492.17             | 229.35              |
| A_68_P29570219 | chr14:45970863-45970907                           | NM_019637:24     | Styx       | INSIDE                 | 0.221                                           | 0.507                            | 3184.68             | 1614.61             | 0.112                            | 2349.79             | 263.33              |
| A_68_P24117827 | chr5:136254305-136254349                          | NM_029659:-71    | Styx11     | DIVERGENT_PROMOTER     | 0.433                                           | 0.535                            | 1742.21             | 931.42              | 0.231                            | 1395.04             | 322.94              |
| A_68_P32143669 | chr19:46471505-46471549                           | NM_001025391:119 | Sufu       | INSIDE                 | 0.227                                           | 0.568                            | 3769.01             | 2140.86             | 0.129                            | 2680.27             | 344.84              |
| A_68_P25949498 | chr8:72567097-72567141                            | NM_027481:407    | Sugp1      | INSIDE                 | 0.210                                           | 0.674                            | 1080.25             | 727.73              | 0.141                            | 883.59              | 124.97              |
| A_68_P25949499 | chr8:72567227-72567271                            | NM_027481:537    | Sugp1      | INSIDE                 | 0.616                                           | 0.530                            | 1543.33             | 817.97              | 0.327                            | 1335.24             | 436.21              |
| A_68_P25950579 | chr8:72758186-72758230                            | NM_001168290:84  | Sugp2      | INSIDE                 | 0.200                                           | 0.491                            | 1547.57             | 759.29              | 0.098                            | 1268.99             | 124.75              |
| A_68_P28154079 | chr11:115397941-115397990                         | NM_133354:-421   | Sumo2      | PROMOTER               | 0.142                                           | 0.550                            | 1981.25             | 1090.26             | 0.078                            | 1531.33             | 119.91              |
| A_68_P27269198 | chr10:77068646-77068690                           | NM_019929:-310   | Sumo3      | PROMOTER               | 0.315                                           | 0.606                            | 1287.95             | 780.64              | 0.191                            | 1038.66             | 198.12              |
| A_68_P24134127 | chr5:139676250-139676294                          | NM_024451:-351   | Sun1       | PROMOTER               | 0.215                                           | 0.545                            | 3313.35             | 1806.29             | 0.117                            | 2218.98             | 259.55              |
| A_68_P24134128 | chr5:139676346-139676390                          | NM_024451:-255   | Sun1       | PROMOTER               | 0.312                                           | 0.728                            | 2664.34             | 1940.32             | 0.227                            | 1851.12             | 420.40              |
| A_68_P24134129 | chr5:139676494-139676538                          | NM_024451:-107   | Sun1       | PROMOTER               | 0.225                                           | 0.479                            | 2168.67             | 1039.52             | 0.108                            | 1474.69             | 159.26              |
| A_68_P24134132 | chr5:139676747-139676791                          | NM_024451:145    | Sun1       | INSIDE                 | 0.226                                           | 0.529                            | 4932.70             | 2610.57             | 0.120                            | 3774.58             | 451.15              |
| A_68_P27542562 | chr10:128106343-128106387                         | NM_173733:4610   | Suox       | DOWNSTREAM             | 0.452                                           | 0.510                            | 1549.51             | 790.34              | 0.231                            | 1277.90             | 294.62              |
| A_68_P29605233 | chr14:52816767-52816813                           | NM_033618:124    | Supt16h    | INSIDE                 | 0.257                                           | 0.546                            | 1965.22             | 1073.44             | 0.140                            | 1373.23             | 192.89              |
| A_68_P29605238 | chr14:52817188-52817232                           | NM_033618:-296   | Supt16h    | PROMOTER               | 0.629                                           | 0.713                            | 1878.41             | 1339.91             | 0.449                            | 1684.43             | 755.82              |
| A_68_P31197213 | chr17:44914413-44914457                           | NM_178652:315    | Supt3h     | INSIDE                 | 0.276                                           | 0.523                            | 1541.87             | 807.13              | 0.145                            | 1330.11             | 192.22              |
| A_68_P27995859 | chr11:87550663-87550719                           | NM_009296:-376   | Supt4h1    | PROMOTER               | 0.220                                           | 0.549                            | 1312.14             | 719.86              | 0.120                            | 981.68              | 118.25              |
| A_68_P27995863 | chr11:87551226-87551270                           | NM_009296:182    | Supt4h1    | INSIDE                 | 0.532                                           | 0.552                            | 1604.92             | 885.25              | 0.293                            | 1244.19             | 364.88              |
| A_68_P25021279 | chr7:29123215-29123259                            | NM_013676:502    | Supt5h     | INSIDE                 | 0.377                                           | 0.553                            | 3336.64             | 1843.66             | 0.208                            | 2427.40             | 505.73              |
| A_68_P21081135 | chr2:26772103-26772147                            | NM_013677:-74    | Surf1      | PROMOTER               | 0.181                                           | 0.625                            | 4877.48             | 3050.33             | 0.113                            | 3438.21             | 389.04              |
| A_68_P21081136 | chr2:26772191-26772235                            | NM_013677:-162   | Surf1      | PROMOTER               | 0.184                                           | 0.553                            | 2078.85             | 1149.54             | 0.102                            | 1443.85             | 147.07              |
| A_68_P21081137 | chr2:26772296-26772346                            | NM_013677:-270   | Surf1      | PROMOTER               | 0.222                                           | 0.469                            | 1525.77             | 716.25              | 0.104                            | 1092.17             | 113.86              |
| A_68_P21081132 | chr2:26771837-26771881                            | NM_013678:-82    | Surf2      | PROMOTER               | 0.218                                           | 0.581                            | 1757.38             | 1021.63             | 0.127                            | 1228.82             | 155.81              |
| A_68_P21081016 | chr2:26758519-26758565                            | NM_009298:-209   | Surf6      | PROMOTER               | 0.216                                           | 0.444                            | 1587.69             | 705.71              | 0.096                            | 1208.72             | 115.86              |
| A_68_P22956443 | chr4:59450910-59450954                            | NM_001163288:573 | Susd1      | INSIDE                 | 0.509                                           | 0.730                            | 6056.34             | 4421.95             | 0.372                            | 4740.52             | 1762.26             |
| A_68_P32241629 | chrX:7651043-7651087                              | NM_011514:822    | Suv39h1    | INSIDE                 | 0.072                                           | 1.414                            | 2929.62             | 4142.89             | 0.102                            | 1185.63             | 120.42              |
| A_68_P32241630 | chrX:7651107-7651151                              | NM_011514:758    | Suv39h1    | INSIDE                 | 0.258                                           | 1.452                            | 3468.64             | 5035.74             | 0.375                            | 1484.14             | 556.46              |
| A_68_P20962665 | chr2:3391654-3391704                              | NM_022724:580    | Suv39h2    | INSIDE                 | 0.242                                           | 0.594                            | 1232.45             | 732.22              | 0.144                            | 848.70              | 122.23              |
| A_68_P20962671 | chr2:3392446-3392492                              | NM_022724:-210   | Suv39h2    | PROMOTER               | 0.519                                           | 0.521                            | 984.43              | 513.13              | 0.270                            | 782.82              | 211.70              |
| A_68_P31919099 | chr19:3767561-3767605                             | NM_001167884:162 | Suv420h1   | INSIDE                 | 0.534                                           | 0.520                            | 1448.19             | 752.98              | 0.278                            | 1192.43             | 331.36              |
| A_68_P31919102 | chr19:3767890-3767935                             | NM_001167884:492 | Suv420h1   | INSIDE                 | 0.582                                           | 0.368                            | 1882.44             | 692.33              | 0.214                            | 1476.78             | 316.13              |

| ProbeName      | Target position of probe on CpG island microarray | TargetID          | GeneSymbol | CpG island Description | Ratio of relative methylation (TiO2-NP/Vehicle) | Sham group                       |                     |                     | TiO <sub>2</sub> -H group        |                     |                     |
|----------------|---------------------------------------------------|-------------------|------------|------------------------|-------------------------------------------------|----------------------------------|---------------------|---------------------|----------------------------------|---------------------|---------------------|
|                |                                                   |                   |            |                        |                                                 | Relative methylation (Cy-5/Cy-3) | Cy-3 signal (Input) | Cy-5 signal (MeDIP) | Relative methylation (Cy-5/Cy-3) | Cy-3 signal (Input) | Cy-5 signal (MeDIP) |
| A_68_P31919105 | chr19:3768272-3768316                             | NM_001167884:874  | Suv420h1   | INSIDE                 | 0.312                                           | 0.488                            | 1204.30             | 588.05              | 0.152                            | 1004.06             | 153.05              |
| A_68_P27952008 | chr11:79806189-79806233                           | NM_001163018:-397 | Suz12      | PROMOTER               | 0.441                                           | 0.572                            | 915.55              | 524.12              | 0.252                            | 779.33              | 196.59              |
| A_68_P29243708 | chr13:96731321-96731365                           | NM_029210:171190  | Sv2c       | INSIDE                 | 0.323                                           | 0.541                            | 1120.33             | 605.63              | 0.175                            | 969.44              | 169.49              |
| A_68_P29243709 | chr13:96731427-96731477                           | NM_029210:171080  | Sv2c       | INSIDE                 | 0.207                                           | 0.697                            | 1088.88             | 758.67              | 0.144                            | 842.99              | 121.36              |
| A_68_P24001850 | chr5:114541225-114541269                          | NM_026805:143     | Svop       | INSIDE                 | 0.577                                           | 4.049                            | 564.96              | 2287.46             | 2.338                            | 415.58              | 971.69              |
| A_68_P32791361 | chrX:159326363-159326407                          | NM_025932:10      | Syap1      | INSIDE                 | 0.645                                           | 5.291                            | 1302.62             | 6892.50             | 3.411                            | 603.29              | 2058.07             |
| A_68_P26022397 | chr8:87396203-87396247                            | NM_001168244:68   | Sycc2      | INSIDE                 | 0.174                                           | 1.579                            | 8319.12             | 13136.59            | 0.275                            | 5430.36             | 1492.67             |
| A_68_P23325609 | chr4:134487161-134487205                          | NM_026780:288     | Syf2       | INSIDE                 | 0.156                                           | 0.486                            | 2314.27             | 1123.92             | 0.076                            | 1624.03             | 122.75              |
| A_68_P32290626 | chrX:20497844-20497888                            | NM_001110780:178  | Syn1       | INSIDE                 | 0.149                                           | 1.424                            | 1314.25             | 1871.98             | 0.213                            | 567.33              | 120.62              |
| A_68_P28550371 | chr12:76920085-76920143                           | NM_001005510:810  | Syne2      | INSIDE                 | 0.178                                           | 0.419                            | 2072.35             | 868.40              | 0.075                            | 1623.89             | 121.31              |
| A_68_P31020008 | chr17:5941641-5941685                             | NM_001113352:383  | Synj2      | INSIDE                 | 0.428                                           | 0.643                            | 1695.65             | 1090.26             | 0.275                            | 1397.27             | 384.47              |
| A_68_P25195706 | chr7:74904045-74904089                            | NM_183312:562     | Synm       | INSIDE                 | 0.538                                           | 0.435                            | 1667.21             | 724.89              | 0.234                            | 1472.48             | 344.67              |
| A_68_P25195709 | chr7:74904507-74904551                            | NM_183312:100     | Synm       | INSIDE                 | 0.633                                           | 0.428                            | 3143.10             | 1344.47             | 0.271                            | 2529.27             | 684.46              |
| A_68_P31752323 | chr18:60755666-60755710                           | NM_177340:28271   | Synpo      | INSIDE                 | 0.220                                           | 0.694                            | 2519.68             | 1747.97             | 0.153                            | 2012.45             | 306.92              |
| A_68_P31752537 | chr18:60784125-60784169                           | NM_177340:-187    | Synpo      | PROMOTER               | 0.368                                           | 0.713                            | 2813.16             | 2005.75             | 0.262                            | 2269.24             | 595.25              |
| A_68_P32239400 | chrX:7215668-7215712                              | NM_009305:-15     | Syp        | PROMOTER               | 0.085                                           | 1.890                            | 8689.40             | 16423.24            | 0.161                            | 3233.06             | 521.89              |
| A_68_P32239401 | chrX:7215812-7215857                              | NM_009305:129     | Syp        | INSIDE                 | 0.330                                           | 1.564                            | 3404.39             | 5325.71             | 0.517                            | 1357.55             | 701.23              |
| A_68_P32239402 | chrX:7215889-7215933                              | NM_009305:205     | Syp        | INSIDE                 | 0.146                                           | 2.741                            | 2039.56             | 5590.66             | 0.400                            | 797.29              | 319.04              |
| A_68_P28339006 | chr12:33638754-33638798                           | NM_013635:-33     | Syp1       | PROMOTER               | 0.601                                           | 0.482                            | 1530.53             | 737.06              | 0.290                            | 1198.52             | 347.09              |
| A_68_P22411405 | chr3:108029325-108029369                          | NM_008596:171     | Syp12      | INSIDE                 | 0.577                                           | 0.591                            | 3969.92             | 2348.18             | 0.341                            | 3288.41             | 1121.94             |
| A_68_P22411407 | chr3:108029536-108029580                          | NM_008596:-41     | Syp12      | PROMOTER               | 0.329                                           | 0.624                            | 909.47              | 567.79              | 0.206                            | 664.03              | 136.49              |
| A_68_P21818004 | chr2:164287014-164287058                          | NM_025575:566     | Sys1       | INSIDE                 | 0.402                                           | 0.517                            | 1359.86             | 703.50              | 0.208                            | 1188.15             | 247.05              |
| A_68_P31923329 | chr19:4476649-4476693                             | NM_134164:473     | Syt12      | INSIDE                 | 0.209                                           | 0.584                            | 1908.85             | 1114.19             | 0.122                            | 1492.52             | 181.69              |
| A_68_P20946924 | chr1:194862258-194862302                          | NM_181546:-388    | Syt14      | PROMOTER               | 0.303                                           | 1.558                            | 5136.92             | 8003.02             | 0.472                            | 3535.96             | 1667.82             |
| A_68_P20634930 | chr1:136605441-136605485                          | NM_009307:62205   | Syt2       | INSIDE                 | 0.209                                           | 0.623                            | 1887.85             | 1177.05             | 0.130                            | 1439.02             | 187.36              |
| A_68_P20634931 | chr1:136605584-136605628                          | NM_009307:62349   | Syt2       | INSIDE                 | 0.149                                           | 0.569                            | 1850.55             | 1053.27             | 0.085                            | 1400.73             | 118.94              |
| A_68_P22386738 | chr3:103379153-103379197                          | NM_018800:-29     | Syt6       | PROMOTER               | 0.138                                           | 0.547                            | 3752.83             | 2051.75             | 0.075                            | 2824.36             | 212.93              |
| A_68_P22386744 | chr3:103379702-103379746                          | NM_018800:521     | Syt6       | INSIDE                 | 0.626                                           | 0.631                            | 840.40              | 530.69              | 0.395                            | 752.89              | 297.67              |
| A_68_P31932349 | chr19:6047162-6047206                             | NM_001164709:40   | Syvn1      | INSIDE                 | 0.114                                           | 0.633                            | 1976.36             | 1251.08             | 0.072                            | 1616.46             | 116.79              |
| A_68_P31932352 | chr19:6047496-6047540                             | NM_001164709:374  | Syvn1      | INSIDE                 | 0.491                                           | 0.502                            | 1959.48             | 983.17              | 0.246                            | 1510.55             | 372.35              |
| A_68_P23240175 | chr4:118081682-118081726                          | NM_198170:164     | Szt2       | INSIDE                 | 0.422                                           | 0.619                            | 2031.40             | 1257.39             | 0.261                            | 1720.99             | 449.84              |
| A_68_P32958525 | chr17:8627413-8627457                             | NM_009309:147     | T          | INSIDE                 | 0.436                                           | 0.669                            | 1899.94             | 1271.80             | 0.292                            | 1570.06             | 458.17              |
| A_68_P26921705 | chr10:7675095-7675141                             | NM_138667:803     | Tab2       | INSIDE                 | 0.248                                           | 0.490                            | 1294.80             | 634.17              | 0.121                            | 1001.60             | 121.49              |
| A_68_P26921714 | chr10:7676666-7676718                             | NM_138667:-771    | Tab2       | PROMOTER               | 0.175                                           | 0.629                            | 1484.26             | 933.95              | 0.110                            | 1229.81             | 135.45              |
| A_68_P25725927 | chr8:26311587-26311631                            | NM_177089:313     | Tacc1      | INSIDE                 | 0.185                                           | 0.387                            | 2292.71             | 887.34              | 0.072                            | 1693.11             | 121.27              |
| A_68_P23590346 | chr5:34000962-34001006                            | NM_001040435:189  | Tacc3      | INSIDE                 | 0.150                                           | 0.562                            | 2048.93             | 1151.90             | 0.085                            | 1386.66             | 117.30              |
| A_68_P23590347 | chr5:34001167-34001211                            | NM_001040435:393  | Tacc3      | INSIDE                 | 0.138                                           | 0.532                            | 2087.73             | 1110.09             | 0.074                            | 1585.54             | 116.58              |
| A_68_P23590348 | chr5:34001258-34001302                            | NM_001040435:485  | Tacc3      | INSIDE                 | 0.280                                           | 0.502                            | 1566.40             | 786.82              | 0.141                            | 1212.27             | 170.46              |
| A_68_P28099381 | chr11:105927583-105927627                         | NM_027346:184     | Taco1      | INSIDE                 | 0.519                                           | 0.617                            | 2035.81             | 1255.81             | 0.320                            | 1585.00             | 507.13              |
| A_68_P24521962 | chr6:67485386-67485430                            | NM_020047:408     | Tacstd2    | INSIDE                 | 0.265                                           | 0.563                            | 1048.17             | 590.62              | 0.150                            | 817.80              | 122.34              |
| A_68_P24521963 | chr6:67485504-67485548                            | NM_020047:290     | Tacstd2    | INSIDE                 | 0.182                                           | 0.625                            | 1355.82             | 847.36              | 0.114                            | 1084.56             | 123.42              |
| A_68_P24521964 | chr6:67485578-67485622                            | NM_020047:216     | Tacstd2    | INSIDE                 | 0.317                                           | 0.706                            | 1491.28             | 1053.38             | 0.224                            | 1233.32             | 276.08              |
| A_68_P20799887 | chr1:168309926-168309970                          | NM_030245:651     | Tada1      | INSIDE                 | 0.357                                           | 0.628                            | 1726.09             | 1083.70             | 0.224                            | 1385.60             | 310.29              |
| A_68_P23607899 | chr5:36826309-36826353                            | NM_001170454:604  | Tada2b     | INSIDE                 | 0.232                                           | 0.687                            | 2737.89             | 1879.93             | 0.159                            | 1874.62             | 298.03              |

| ProbeName      | Target position of probe on CpG island microarray | TargetID           | GeneSymbol | CpG island Description | Ratio of relative methylation (TiO2-NP/Vehicle) | Sham group                       |                     |                     | TiO <sub>2</sub> -H group        |                     |                     |
|----------------|---------------------------------------------------|--------------------|------------|------------------------|-------------------------------------------------|----------------------------------|---------------------|---------------------|----------------------------------|---------------------|---------------------|
|                |                                                   |                    |            |                        |                                                 | Relative methylation (Cy-5/Cy-3) | Cy-3 signal (Input) | Cy-5 signal (MeDIP) | Relative methylation (Cy-5/Cy-3) | Cy-3 signal (Input) | Cy-5 signal (MeDIP) |
| A_68_P32564413 | chrX:98728110-98728154                            | NM_001081008:59    | Taf1       | INSIDE                 | 0.197                                           | 1.551                            | 837.42              | 1298.49             | 0.306                            | 376.49              | 115.13              |
| A_68_P27971715 | chr11:83286236-83286295                           | NM_027427:344      | Taf15      | DIVERGENT_PROMOTER     | 0.185                                           | 0.604                            | 1459.98             | 881.99              | 0.112                            | 1097.66             | 122.81              |
| A_68_P26215000 | chr8:122128943-122128988                          | NM_021441:175      | Taf1c      | INSIDE                 | 0.141                                           | 0.699                            | 1865.55             | 1304.40             | 0.099                            | 1397.70             | 137.69              |
| A_68_P32147457 | chr19:47142031-47142081                           | NM_177342:-181     | Taf5       | PROMOTER               | 0.153                                           | 0.465                            | 2668.17             | 1239.73             | 0.071                            | 1920.01             | 136.51              |
| A_68_P32147505 | chr19:47149484-47149530                           | NM_177342:7269     | Taf5       | INSIDE                 | 0.601                                           | 3.208                            | 269.63              | 865.01              | 1.927                            | 289.71              | 558.29              |
| A_68_P31023476 | chr17:7165875-7165919                             | NM_147155:-391     | Tagap1     | PROMOTER               | 0.075                                           | 0.662                            | 10591.97            | 7015.01             | 0.050                            | 7779.16             | 388.33              |
| A_68_P20833435 | chr1:174430368-174430412                          | NM_178598:14       | Tagln2     | INSIDE                 | 0.259                                           | 0.561                            | 1076.93             | 604.25              | 0.145                            | 856.45              | 124.37              |
| A_68_P20833437 | chr1:174430507-174430560                          | NM_178598:157      | Tagln2     | INSIDE                 | 0.211                                           | 0.632                            | 1185.26             | 748.97              | 0.133                            | 872.30              | 116.31              |
| A_68_P20833440 | chr1:174430851-174430895                          | NM_178598:496      | Tagln2     | INSIDE                 | 0.208                                           | 1.526                            | 3322.33             | 5068.85             | 0.318                            | 2115.33             | 672.02              |
| A_68_P23223128 | chr4:114729001-114729045                          | NM_011527:-3109    | Tal1       | PROMOTER               | 0.248                                           | 0.628                            | 2838.27             | 1782.73             | 0.156                            | 2026.60             | 315.49              |
| A_68_P23223130 | chr4:114729210-114729264                          | NM_011527:-2895    | Tal1       | PROMOTER               | 0.247                                           | 0.599                            | 1091.58             | 653.85              | 0.148                            | 812.11              | 120.04              |
| A_68_P23223132 | chr4:114729449-114729493                          | NM_011527:-2661    | Tal1       | PROMOTER               | 0.255                                           | 0.725                            | 4478.27             | 3247.27             | 0.185                            | 3204.40             | 593.51              |
| A_68_P23223137 | chr4:114730092-114730136                          | NM_011527:-2017    | Tal1       | PROMOTER               | 0.402                                           | 1.506                            | 1521.71             | 2292.42             | 0.606                            | 1280.29             | 776.17              |
| A_68_P28096909 | chr11:105451661-105451705                         | NM_181071:383      | Tanc2      | INSIDE                 | 0.424                                           | 0.670                            | 1636.27             | 1096.28             | 0.284                            | 1449.26             | 411.89              |
| A_68_P21265453 | chr2:61494424-61494471                            | NM_001164071:63294 | Tank       | DOWNSTREAM             | 0.465                                           | 0.591                            | 1437.71             | 849.42              | 0.275                            | 955.14              | 262.41              |
| A_68_P21265457 | chr2:61494997-61495041                            | NM_001164071:63865 | Tank       | DOWNSTREAM             | 0.176                                           | 0.610                            | 1551.97             | 946.09              | 0.107                            | 1221.48             | 130.74              |
| A_68_P25502831 | chr7:134028530-134028574                          | NM_001163774:-71   | Taok2      | PROMOTER               | 0.215                                           | 0.532                            | 1210.85             | 643.63              | 0.114                            | 1093.88             | 124.80              |
| A_68_P24018824 | chr5:117569883-117569927                          | NM_001199685:-233  | Taok3      | DIVERGENT_PROMOTER     | 0.146                                           | 0.565                            | 1899.34             | 1073.81             | 0.083                            | 1433.26             | 118.63              |
| A_68_P24018832 | chr5:117570657-117570701                          | NM_001199685:541   | Taok3      | INSIDE                 | 0.313                                           | 1.384                            | 2333.12             | 3228.26             | 0.433                            | 1762.46             | 763.32              |
| A_68_P31152609 | chr17:34324546-34324590                           | NM_001161730:68    | Tap1       | INSIDE                 | 0.507                                           | 0.532                            | 2606.50             | 1387.87             | 0.270                            | 2083.49             | 562.90              |
| A_68_P31152610 | chr17:34324622-34324668                           | NM_001161730:144   | Tap1       | INSIDE                 | 0.150                                           | 0.577                            | 2120.30             | 1223.20             | 0.086                            | 1547.66             | 133.51              |
| A_68_P31150992 | chr17:34056973-34057020                           | NM_001025313:574   | Tapbp      | INSIDE                 | 0.263                                           | 0.458                            | 1400.82             | 641.17              | 0.120                            | 1005.80             | 120.94              |
| A_68_P31151041 | chr17:34066176-34066220                           | NM_001025313:9776  | Tapbp      | INSIDE                 | 0.256                                           | 1.682                            | 1534.38             | 2580.59             | 0.431                            | 1104.55             | 476.40              |
| A_68_P30498347 | chr15:102349032-102349076                         | NM_009319:378      | Tarbp2     | INSIDE                 | 0.255                                           | 0.498                            | 1317.88             | 656.61              | 0.127                            | 1019.98             | 129.51              |
| A_68_P23395556 | chr4:148000439-148000483                          | NM_001003898:645   | Tardbp     | INSIDE                 | 0.457                                           | 0.400                            | 1581.02             | 632.18              | 0.183                            | 1092.36             | 199.45              |
| A_68_P30016102 | chr15:11329112-11329156                           | NM_033074:279      | Tars       | INSIDE                 | 0.435                                           | 1.477                            | 2294.80             | 3389.60             | 0.643                            | 1792.16             | 1152.62             |
| A_68_P23416141 | chr4:151406800-151406844                          | NM_031867:5777     | Tas1r1     | INSIDE                 | 0.579                                           | 2.881                            | 2323.06             | 6692.06             | 1.668                            | 1697.79             | 2831.10             |
| A_68_P21682255 | chr2:139892211-139892255                          | NM_175225:264      | Tasp1      | INSIDE                 | 0.272                                           | 0.556                            | 1569.48             | 873.04              | 0.152                            | 1259.13             | 190.81              |
| A_68_P30251030 | chr15:58765208-58765252                           | NM_175151:55       | Tatdn1     | INSIDE                 | 0.548                                           | 0.598                            | 1946.93             | 1163.77             | 0.327                            | 1508.81             | 493.79              |
| A_68_P30251031 | chr15:58765278-58765322                           | NM_175151:-15      | Tatdn1     | DIVERGENT_PROMOTER     | 0.343                                           | 0.550                            | 962.61              | 529.46              | 0.189                            | 846.52              | 159.61              |
| A_68_P24760939 | chr6:113646833-113646877                          | NM_001033463:-638  | Tatdn2     | PROMOTER               | 0.268                                           | 0.607                            | 1884.49             | 1144.62             | 0.163                            | 1714.85             | 278.69              |
| A_68_P24760940 | chr6:113646921-113646965                          | NM_001033463:-550  | Tatdn2     | PROMOTER               | 0.643                                           | 0.310                            | 1943.88             | 603.41              | 0.200                            | 1473.06             | 294.21              |
| A_68_P24760947 | chr6:113647724-113647768                          | NM_001033463:254   | Tatdn2     | INSIDE                 | 0.649                                           | 0.524                            | 1236.48             | 648.06              | 0.340                            | 1076.77             | 366.41              |
| A_68_P20936014 | chr1:192886534-192886578                          | NM_001163421:255   | Tatdn3     | INSIDE                 | 0.125                                           | 0.724                            | 2061.60             | 1492.45             | 0.090                            | 1561.98             | 140.93              |
| A_68_P20936015 | chr1:192886699-192886743                          | NM_001163421:91    | Tatdn3     | INSIDE                 | 0.260                                           | 0.715                            | 1415.22             | 1011.79             | 0.186                            | 1138.24             | 211.49              |
| A_68_P24452213 | chr6:52663843-52663887                            | NM_025816:142      | Tax1bp1    | INSIDE                 | 0.402                                           | 0.633                            | 1114.69             | 706.07              | 0.255                            | 971.26              | 247.36              |
| A_68_P27915644 | chr11:72991108-72991152                           | NM_029564:546      | Tax1bp3    | INSIDE                 | 0.561                                           | 0.614                            | 1118.93             | 687.16              | 0.344                            | 937.63              | 322.86              |
| A_68_P23749448 | chr5:64550705-64550749                            | NM_019636:-723     | Tbc1d1     | PROMOTER               | 0.098                                           | 0.588                            | 2519.70             | 1480.59             | 0.058                            | 2083.97             | 119.96              |
| A_68_P23749449 | chr5:64550826-64550870                            | NM_019636:-601     | Tbc1d1     | PROMOTER               | 0.584                                           | 0.723                            | 1945.85             | 1406.56             | 0.422                            | 1543.93             | 651.55              |
| A_68_P23749880 | chr5:64621862-64621906                            | NM_019636:70435    | Tbc1d1     | INSIDE                 | 0.548                                           | 0.474                            | 1482.14             | 702.26              | 0.260                            | 1194.78             | 310.27              |
| A_68_P25504557 | chr7:134351496-134351540                          | NM_144522:464      | Tbc1d10b   | INSIDE                 | 0.322                                           | 0.584                            | 1091.21             | 637.29              | 0.188                            | 691.62              | 130.07              |
| A_68_P32103865 | chr19:38911994-38912038                           | NM_145952:948      | Tbc1d12    | INSIDE                 | 0.201                                           | 0.409                            | 1826.24             | 746.26              | 0.082                            | 1472.60             | 120.68              |
| A_68_P21101533 | chr2:29989110-29989161                            | NM_146252:-255     | Tbc1d13    | DIVERGENT_PROMOTER     | 0.470                                           | 0.705                            | 1526.27             | 1075.63             | 0.331                            | 1120.23             | 370.66              |
| A_68_P21101536 | chr2:29989398-29989442                            | NM_146252:30       | Tbc1d13    | INSIDE                 | 0.454                                           | 0.639                            | 1289.64             | 824.39              | 0.290                            | 948.16              | 275.09              |

| ProbeName      | Target position of probe on CpG island microarray | TargetID           | GeneSymbol | CpG island Description | Ratio of relative methylation (TiO2-NP/Vehicle) | Sham group                       |                     |                     | TiO <sub>2</sub> -H group        |                     |                     |
|----------------|---------------------------------------------------|--------------------|------------|------------------------|-------------------------------------------------|----------------------------------|---------------------|---------------------|----------------------------------|---------------------|---------------------|
|                |                                                   |                    |            |                        |                                                 | Relative methylation (Cy-5/Cy-3) | Cy-3 signal (Input) | Cy-5 signal (MeDIP) | Relative methylation (Cy-5/Cy-3) | Cy-3 signal (Input) | Cy-5 signal (MeDIP) |
| A_68_P21101537 | chr2:29989486-29989530                            | NM_146252:118      | Tbc1d13    | INSIDE                 | 0.261                                           | 0.307                            | 1950.56             | 598.97              | 0.080                            | 1516.43             | 121.56              |
| A_68_P23608243 | chr5:36872903-36872947                            | NM_001113364:348   | Tbc1d14    | INSIDE                 | 0.226                                           | 0.564                            | 1122.37             | 633.34              | 0.128                            | 919.62              | 117.39              |
| A_68_P23608588 | chr5:36925165-36925210                            | NM_133910:-141     | Tbc1d14    | PROMOTER               | 0.135                                           | 0.507                            | 2254.95             | 1143.40             | 0.068                            | 1693.06             | 115.56              |
| A_68_P27468585 | chr10:114688513-114688557                         | NM_025706:15       | Tbc1d15    | INSIDE                 | 0.081                                           | 1.643                            | 1762.21             | 2894.45             | 0.133                            | 1156.78             | 153.80              |
| A_68_P27468586 | chr10:114688584-114688628                         | NM_025706:-57      | Tbc1d15    | PROMOTER               | 0.110                                           | 1.338                            | 3399.19             | 4547.68             | 0.147                            | 2431.45             | 357.55              |
| A_68_P25089653 | chr7:52103806-52103850                            | NM_001042655:621   | Tbc1d17    | INSIDE                 | 0.102                                           | 0.696                            | 2513.65             | 1748.40             | 0.071                            | 1809.48             | 128.72              |
| A_68_P23702720 | chr5:54200876-54200920                            | NM_144517:33       | Tbc1d19    | INSIDE                 | 0.301                                           | 0.709                            | 1440.75             | 1020.80             | 0.213                            | 1099.03             | 234.00              |
| A_68_P22889891 | chr4:46663047-46663091                            | NM_198664:3        | Tbc1d2     | INSIDE                 | 0.609                                           | 0.618                            | 2097.59             | 1295.27             | 0.376                            | 1552.68             | 584.26              |
| A_68_P22889897 | chr4:46663588-46663636                            | NM_198664:-541     | Tbc1d2     | PROMOTER               | 0.407                                           | 0.662                            | 982.47              | 650.35              | 0.269                            | 767.27              | 206.69              |
| A_68_P30405820 | chr15:86044641-86044685                           | NM_145476:-226     | Tbc1d22a   | PROMOTER               | 0.347                                           | 0.565                            | 2300.99             | 1300.40             | 0.196                            | 1734.31             | 339.90              |
| A_68_P30405821 | chr15:86044775-86044819                           | NM_145476:-92      | Tbc1d22a   | PROMOTER               | 0.584                                           | 0.707                            | 1291.53             | 913.22              | 0.413                            | 1017.61             | 420.45              |
| A_68_P30405823 | chr15:86045014-86045058                           | NM_145476:148      | Tbc1d22a   | INSIDE                 | 0.431                                           | 1.568                            | 5816.42             | 9120.58             | 0.677                            | 3995.28             | 2702.95             |
| A_68_P30405824 | chr15:86045163-86045207                           | NM_145476:296      | Tbc1d22a   | INSIDE                 | 0.227                                           | 1.886                            | 5680.44             | 10712.98            | 0.428                            | 3911.71             | 1672.61             |
| A_68_P31096038 | chr17:24342160-24342204                           | NM_001163847:325   | Tbc1d24    | INSIDE                 | 0.145                                           | 1.358                            | 5357.45             | 7277.47             | 0.197                            | 3351.03             | 659.28              |
| A_68_P31096050 | chr17:24343435-24343480                           | NM_001163847:-950  | Tbc1d24    | PROMOTER               | 0.082                                           | 0.687                            | 3700.30             | 2541.32             | 0.056                            | 2675.83             | 150.10              |
| A_68_P31096072 | chr17:24345615-24345659                           | NM_001163847:-3129 | Tbc1d24    | PROMOTER               | 0.180                                           | 0.609                            | 1317.18             | 802.77              | 0.110                            | 1082.52             | 118.90              |
| A_68_P31096074 | chr17:24345798-24345842                           | NM_001163847:-3313 | Tbc1d24    | PROMOTER               | 0.185                                           | 0.625                            | 1172.76             | 733.37              | 0.115                            | 1013.58             | 116.95              |
| A_68_P32242102 | chrX:7752757-7752806                              | NM_001166437:526   | Tbc1d25    | INSIDE                 | 0.173                                           | 1.792                            | 950.57              | 1703.61             | 0.311                            | 377.75              | 117.32              |
| A_68_P26717017 | chr9:90165120-90165164                            | NM_194334:465      | Tbc1d2b    | INSIDE                 | 0.575                                           | 0.698                            | 2545.27             | 1777.14             | 0.402                            | 1817.95             | 730.18              |
| A_68_P26717018 | chr9:90165190-90165234                            | NM_194334:395      | Tbc1d2b    | INSIDE                 | 0.364                                           | 0.392                            | 1692.75             | 663.34              | 0.143                            | 1481.25             | 211.49              |
| A_68_P26717019 | chr9:90165367-90165411                            | NM_194334:219      | Tbc1d2b    | INSIDE                 | 0.453                                           | 0.582                            | 1498.80             | 872.68              | 0.264                            | 1262.42             | 332.92              |
| A_68_P29855885 | chr14:102007169-102007213                         | NM_001081278:1218  | Tbc1d4     | INSIDE                 | 0.234                                           | 0.626                            | 2309.75             | 1445.57             | 0.146                            | 1716.71             | 251.11              |
| A_68_P29855886 | chr14:102007246-102007295                         | NM_001081278:1138  | Tbc1d4     | INSIDE                 | 0.420                                           | 0.592                            | 1030.36             | 609.95              | 0.249                            | 715.80              | 178.15              |
| A_68_P29855890 | chr14:102007762-102007806                         | NM_001081278:624   | Tbc1d4     | INSIDE                 | 0.368                                           | 0.515                            | 2418.56             | 1245.80             | 0.190                            | 1945.13             | 368.82              |
| A_68_P29855894 | chr14:102008105-102008149                         | NM_001081278:282   | Tbc1d4     | INSIDE                 | 0.109                                           | 0.544                            | 2654.64             | 1444.88             | 0.059                            | 2059.87             | 121.67              |
| A_68_P31232584 | chr17:51318828-51318872                           | NM_028162:-176     | Tbc1d5     | PROMOTER               | 0.666                                           | 0.618                            | 1991.74             | 1231.86             | 0.412                            | 1666.78             | 686.17              |
| A_68_P28988729 | chr13:43266743-43266787                           | NM_025935:-36      | Tbc1d7     | PROMOTER               | 0.486                                           | 0.678                            | 1334.18             | 905.10              | 0.330                            | 1075.69             | 354.84              |
| A_68_P28988730 | chr13:43266919-43266963                           | NM_025935:-212     | Tbc1d7     | PROMOTER               | 0.078                                           | 0.624                            | 3490.74             | 2177.97             | 0.049                            | 2524.62             | 122.59              |
| A_68_P28988731 | chr13:43267019-43267063                           | NM_025935:-312     | Tbc1d7     | PROMOTER               | 0.185                                           | 0.602                            | 1345.41             | 809.27              | 0.112                            | 1080.68             | 120.50              |
| A_68_P26013519 | chr8:85689979-85690023                            | NM_001111304:750   | Tbc1d9     | INSIDE                 | 0.635                                           | 0.650                            | 1327.87             | 862.60              | 0.413                            | 1162.47             | 479.86              |
| A_68_P25030456 | chr7:31016600-31016644                            | NM_025548:426      | Tbcb       | INSIDE                 | 0.253                                           | 0.602                            | 1977.07             | 1191.00             | 0.152                            | 1410.42             | 214.77              |
| A_68_P25030460 | chr7:31017038-31017082                            | NM_025548:-12      | Tbcb       | DIVERGENT_PROMOTER     | 0.356                                           | 0.683                            | 1744.35             | 1192.22             | 0.243                            | 1387.00             | 337.08              |
| A_68_P31209391 | chr17:47027623-47027667                           | NM_178385:75       | Tbcc       | INSIDE                 | 0.264                                           | 0.514                            | 1767.64             | 909.38              | 0.136                            | 1393.69             | 189.26              |
| A_68_P30600190 | chr16:22857403-22857447                           | NM_001081368:218   | Tbccd1     | INSIDE                 | 0.300                                           | 0.504                            | 1833.25             | 923.31              | 0.151                            | 1422.85             | 215.19              |
| A_68_P22538542 | chr3:132347071-132347115                          | NM_173032:-15      | Tbck       | DIVERGENT_PROMOTER     | 0.483                                           | 0.530                            | 2348.87             | 1245.55             | 0.256                            | 1857.29             | 475.36              |
| A_68_P22538543 | chr3:132347141-132347185                          | NM_173032:55       | Tbck       | INSIDE                 | 0.538                                           | 0.648                            | 1433.46             | 928.75              | 0.348                            | 1176.50             | 410.00              |
| A_68_P22538544 | chr3:132347238-132347282                          | NM_173032:153      | Tbck       | INSIDE                 | 0.147                                           | 0.539                            | 1856.66             | 1000.80             | 0.079                            | 1473.03             | 116.98              |
| A_68_P22538545 | chr3:132347325-132347369                          | NM_173032:239      | Tbck       | INSIDE                 | 0.242                                           | 0.564                            | 1141.22             | 644.05              | 0.137                            | 872.71              | 119.33              |
| A_68_P21986756 | chr3:21974577-21974636                            | NM_030732:-967     | Tbllxr1    | PROMOTER               | 0.187                                           | 0.445                            | 1879.65             | 836.66              | 0.083                            | 1462.30             | 122.04              |
| A_68_P21986757 | chr3:21974664-21974711                            | NM_030732:-886     | Tbllxr1    | PROMOTER               | 0.279                                           | 0.374                            | 1515.46             | 566.59              | 0.104                            | 1158.01             | 120.71              |
| A_68_P21986761 | chr3:21975073-21975117                            | NM_030732:-479     | Tbllxr1    | PROMOTER               | 0.353                                           | 0.519                            | 2249.55             | 1167.90             | 0.183                            | 1855.31             | 339.58              |
| A_68_P21266386 | chr2:61643664-61643708                            | NM_009322:1177     | Tbr1       | INSIDE                 | 0.235                                           | 0.370                            | 1751.30             | 648.82              | 0.087                            | 1354.19             | 118.14              |
| A_68_P21266387 | chr2:61643809-61643853                            | NM_009322:1321     | Tbr1       | INSIDE                 | 0.378                                           | 0.411                            | 3510.27             | 1442.32             | 0.155                            | 2675.82             | 415.74              |
| A_68_P21266443 | chr2:61650440-61650484                            | NM_009322:7953     | Tbr1       | INSIDE                 | 0.457                                           | 0.568                            | 1269.99             | 721.43              | 0.260                            | 934.88              | 242.89              |

| ProbeName      | Target position of probe on CpG island microarray | TargetID           | GeneSymbol | CpG island Description | Ratio of relative methylation (TiO2-NP/Vehicle) | Sham group                       |                     |                     | TiO <sub>2</sub> -H group        |                     |                     |
|----------------|---------------------------------------------------|--------------------|------------|------------------------|-------------------------------------------------|----------------------------------|---------------------|---------------------|----------------------------------|---------------------|---------------------|
|                |                                                   |                    |            |                        |                                                 | Relative methylation (Cy-5/Cy-3) | Cy-3 signal (Input) | Cy-5 signal (MeDIP) | Relative methylation (Cy-5/Cy-3) | Cy-3 signal (Input) | Cy-5 signal (MeDIP) |
| A_68_P26431942 | chr9:37464709-37464753                            | NM_025289:167      | Tbrg1      | INSIDE                 | 0.474                                           | 0.558                            | 919.30              | 513.02              | 0.265                            | 693.35              | 183.39              |
| A_68_P26431943 | chr9:37464781-37464825                            | NM_025289:95       | Tbrg1      | INSIDE                 | 0.244                                           | 0.463                            | 1252.33             | 580.45              | 0.113                            | 1042.16             | 117.71              |
| A_68_P30385311 | chr15:82730377-82730421                           | NR_027799:-1507    | Tbrg3      | PROMOTER               | 0.548                                           | 0.707                            | 1452.20             | 1026.17             | 0.388                            | 1282.99             | 497.26              |
| A_68_P27569494 | chr11:6526399-6526444                             | NM_001130457:-351  | Tbrg4      | PROMOTER               | 0.285                                           | 0.562                            | 990.46              | 556.67              | 0.160                            | 735.74              | 117.74              |
| A_68_P30580553 | chr16:18581703-18581747                           | NM_011532:5338     | Tbx1       | DOWNSTREAM             | 0.408                                           | 0.656                            | 1584.96             | 1040.01             | 0.267                            | 1296.88             | 346.80              |
| A_68_P30580616 | chr16:18588788-18588832                           | NM_011532:-1748    | Tbx1       | PROMOTER               | 0.595                                           | 0.415                            | 1778.89             | 738.00              | 0.247                            | 1371.09             | 338.49              |
| A_68_P30580619 | chr16:18589104-18589148                           | NM_011532:-2064    | Tbx1       | PROMOTER               | 0.561                                           | 0.697                            | 2396.69             | 1671.42             | 0.391                            | 1860.59             | 727.67              |
| A_68_P30580630 | chr16:18590465-18590509                           | NM_011532:-3424    | Tbx1       | PROMOTER               | 0.262                                           | 0.636                            | 1959.90             | 1246.80             | 0.167                            | 1509.33             | 251.50              |
| A_68_P26706396 | chr9:87624611-87624655                            | NM_023814:1463     | Tbx18      | INSIDE                 | 0.202                                           | 0.428                            | 1771.06             | 757.16              | 0.086                            | 1387.00             | 119.78              |
| A_68_P26706400 | chr9:87625023-87625067                            | NM_023814:1051     | Tbx18      | INSIDE                 | 0.635                                           | 0.436                            | 1733.04             | 755.80              | 0.277                            | 1521.64             | 421.40              |
| A_68_P26706408 | chr9:87625899-87625944                            | NM_023814:174      | Tbx18      | INSIDE                 | 0.159                                           | 0.689                            | 1381.98             | 952.27              | 0.110                            | 1081.58             | 118.54              |
| A_68_P26706479 | chr9:87634192-87634246                            | NM_023814:-8123    | Tbx18      | PROMOTER               | 0.279                                           | 0.466                            | 1263.18             | 588.70              | 0.130                            | 937.83              | 121.87              |
| A_68_P26706481 | chr9:87634446-87634490                            | NM_023814:-8373    | Tbx18      | PROMOTER               | 0.426                                           | 0.636                            | 1528.24             | 972.50              | 0.271                            | 1240.49             | 336.63              |
| A_68_P26706484 | chr9:87634686-87634730                            | NM_023814:-8613    | Tbx18      | PROMOTER               | 0.517                                           | 0.338                            | 1611.29             | 544.04              | 0.175                            | 1292.66             | 225.65              |
| A_68_P27985513 | chr11:85643144-85643194                           | NM_009324:-2948    | Tbx2       | PROMOTER               | 0.194                                           | 0.576                            | 1622.49             | 933.82              | 0.112                            | 1070.78             | 119.62              |
| A_68_P27985539 | chr11:85646087-85646145                           | NM_009324:0        | Tbx2       | INSIDE                 | 0.072                                           | 1.485                            | 1523.17             | 2261.27             | 0.107                            | 1092.65             | 116.97              |
| A_68_P27985540 | chr11:85646214-85646259                           | NM_009324:120      | Tbx2       | INSIDE                 | 0.091                                           | 1.680                            | 960.96              | 1614.69             | 0.154                            | 766.00              | 117.73              |
| A_68_P27985547 | chr11:85647100-85647150                           | NM_009324:1008     | Tbx2       | INSIDE                 | 0.598                                           | 2.876                            | 710.64              | 2044.07             | 1.719                            | 539.30              | 926.94              |
| A_68_P27985579 | chr11:85650619-85650663                           | NM_009324:4524     | Tbx2       | INSIDE                 | 0.245                                           | 0.454                            | 1767.83             | 802.03              | 0.111                            | 1126.42             | 125.20              |
| A_68_P27985638 | chr11:85657554-85657604                           | NM_009324:11462    | Tbx2       | DOWNSTREAM             | 0.221                                           | 0.635                            | 2955.37             | 1878.11             | 0.141                            | 2099.88             | 295.11              |
| A_68_P26363429 | chr9:24578655-24578699                            | NM_194263:71       | Tbx20      | INSIDE                 | 0.337                                           | 0.556                            | 1024.81             | 569.50              | 0.187                            | 912.00              | 170.62              |
| A_68_P28048726 | chr11:96976651-96976695                           | NM_019507:-27      | Tbx21      | PROMOTER               | 0.513                                           | 0.478                            | 1637.70             | 783.49              | 0.246                            | 1353.46             | 332.43              |
| A_68_P24033990 | chr5:120120273-120120317                          | NM_011535:-383     | Tbx3       | PROMOTER               | 0.261                                           | 0.394                            | 1541.12             | 606.70              | 0.103                            | 1242.43             | 127.87              |
| A_68_P24034078 | chr5:120130938-120130982                          | NM_011535:10283    | Tbx3       | INSIDE                 | 0.448                                           | 0.550                            | 1811.26             | 996.52              | 0.247                            | 1513.80             | 373.50              |
| A_68_P24034079 | chr5:120131042-120131086                          | NM_011535:10387    | Tbx3       | INSIDE                 | 0.360                                           | 0.706                            | 2245.57             | 1586.31             | 0.255                            | 1559.85             | 397.14              |
| A_68_P24035159 | chr5:120317204-120317248                          | NM_011537:32555    | Tbx5       | INSIDE                 | 0.307                                           | 1.519                            | 3033.48             | 4606.35             | 0.467                            | 1973.23             | 920.98              |
| A_68_P21912031 | chr2:181414879-181414923                          | NM_009326:-114     | Tcea2      | DIVERGENT_PROMOTER     | 0.253                                           | 0.574                            | 1062.47             | 609.89              | 0.145                            | 804.11              | 116.95              |
| A_68_P21912033 | chr2:181415118-181415162                          | NM_009326:126      | Tcea2      | INSIDE                 | 0.410                                           | 0.504                            | 1224.04             | 616.75              | 0.206                            | 930.26              | 192.01              |
| A_68_P21912034 | chr2:181415230-181415274                          | NM_009326:238      | Tcea2      | INSIDE                 | 0.189                                           | 0.419                            | 2077.63             | 871.07              | 0.079                            | 1646.34             | 130.75              |
| A_68_P23332903 | chr4:135804530-135804574                          | NM_011542:681      | Tcea3      | INSIDE                 | 0.071                                           | 1.422                            | 4105.23             | 5839.24             | 0.101                            | 2502.04             | 252.30              |
| A_68_P23332904 | chr4:135804629-135804673                          | NM_011542:779      | Tcea3      | INSIDE                 | 0.252                                           | 1.454                            | 8931.15             | 12984.54            | 0.367                            | 6266.69             | 2298.48             |
| A_68_P31655787 | chr18:42671213-42671257                           | NM_001039474:94    | Tcerg1     | INSIDE                 | 0.514                                           | 0.558                            | 2278.01             | 1270.94             | 0.287                            | 1850.43             | 530.33              |
| A_68_P25571660 | chr7:145588945-145588989                          | NM_183289:447      | Tcerg11    | INSIDE                 | 0.243                                           | 0.622                            | 2394.00             | 1488.74             | 0.151                            | 2010.74             | 303.62              |
| A_68_P30385400 | chr15:82742401-82742445                           | NM_001114140:142   | Tcf20      | INSIDE                 | 0.189                                           | 1.406                            | 5304.86             | 7456.46             | 0.266                            | 3667.11             | 976.41              |
| A_68_P26239528 | chr8:125898007-125898051                          | NM_001037877:294   | Tcf25      | INSIDE                 | 0.229                                           | 0.415                            | 1480.75             | 613.93              | 0.095                            | 1293.94             | 122.71              |
| A_68_P26239532 | chr8:125898381-125898425                          | NM_001037877:668   | Tcf25      | INSIDE                 | 0.268                                           | 2.679                            | 2303.14             | 6169.57             | 0.719                            | 1727.72             | 1241.70             |
| A_68_P24543641 | chr6:72739120-72739164                            | NM_001079822:-192  | Tcf711     | PROMOTER               | 0.638                                           | 0.497                            | 3199.68             | 1591.50             | 0.317                            | 2630.69             | 834.83              |
| A_68_P32196175 | chr19:55817146-55817190                           | NM_001142918:869   | Tcf712     | INSIDE                 | 0.246                                           | 0.608                            | 2512.88             | 1527.96             | 0.150                            | 1820.57             | 272.60              |
| A_68_P28974118 | chr13:40818211-40818255                           | NM_001122948:7580  | Tcfap2a    | INSIDE                 | 0.225                                           | 0.595                            | 1079.99             | 642.85              | 0.134                            | 889.72              | 119.32              |
| A_68_P28974163 | chr13:40823956-40824000                           | NM_001122948:1834  | Tcfap2a    | INSIDE                 | 0.443                                           | 1.386                            | 4339.19             | 6013.21             | 0.614                            | 3160.68             | 1941.24             |
| A_68_P28974165 | chr13:40824171-40824219                           | NM_001122948:1618  | Tcfap2a    | INSIDE                 | 0.623                                           | 0.702                            | 1295.96             | 909.52              | 0.437                            | 1130.91             | 494.40              |
| A_68_P28974205 | chr13:40828820-40828871                           | NM_001122948:-3033 | Tcfap2a    | PROMOTER               | 0.153                                           | 0.716                            | 1524.23             | 1091.89             | 0.110                            | 1085.20             | 119.10              |
| A_68_P28974206 | chr13:40828928-40828972                           | NM_001122948:-3138 | Tcfap2a    | PROMOTER               | 0.320                                           | 0.595                            | 1180.07             | 702.09              | 0.191                            | 875.83              | 166.86              |
| A_68_P28974207 | chr13:40829034-40829090                           | NM_001122948:-3250 | Tcfap2a    | PROMOTER               | 0.215                                           | 0.599                            | 1215.48             | 727.99              | 0.129                            | 918.48              | 118.31              |



| ProbeName      | Target position of probe on CpG island microarray | TargetID           | GeneSymbol | CpG island Description | Ratio of relative methylation (TiO2-NP/Vehicle) | Sham group                       |                     |                     | TiO <sub>2</sub> -H group        |                     |                     |
|----------------|---------------------------------------------------|--------------------|------------|------------------------|-------------------------------------------------|----------------------------------|---------------------|---------------------|----------------------------------|---------------------|---------------------|
|                |                                                   |                    |            |                        |                                                 | Relative methylation (Cy-5/Cy-3) | Cy-3 signal (Input) | Cy-5 signal (MeDIP) | Relative methylation (Cy-5/Cy-3) | Cy-3 signal (Input) | Cy-5 signal (MeDIP) |
| A_68_P28974244 | chr13:40833219-40833263                           | NM_011547:-4048    | Tcfap2a    | PROMOTER               | 0.177                                           | 0.669                            | 1395.70             | 934.25              | 0.119                            | 1036.11             | 122.84              |
| A_68_P28974246 | chr13:40833476-40833520                           | NM_011547:-4306    | Tcfap2a    | PROMOTER               | 0.636                                           | 0.687                            | 1336.42             | 917.93              | 0.437                            | 1185.03             | 517.86              |
| A_68_P20066611 | chr1:19199816-19199872                            | NM_001025305:-2290 | Tcfap2b    | PROMOTER               | 0.543                                           | 0.645                            | 1427.03             | 920.39              | 0.350                            | 1101.28             | 385.88              |
| A_68_P21864922 | chr2:172376858-172376902                          | NM_001159696:390   | Tcfap2c    | INSIDE                 | 0.243                                           | 0.596                            | 1295.26             | 771.39              | 0.145                            | 996.76              | 144.38              |
| A_68_P23281702 | chr4:126409701-126409745                          | NM_198960:3791     | Tcfap2e    | INSIDE                 | 0.396                                           | 0.646                            | 816.79              | 527.67              | 0.256                            | 636.94              | 163.10              |
| A_68_P23281723 | chr4:126412326-126412376                          | NM_198960:1163     | Tcfap2e    | INSIDE                 | 0.230                                           | 0.514                            | 1321.82             | 679.86              | 0.119                            | 1017.52             | 120.60              |
| A_68_P30510672 | chr16:4541712-4541756                             | NM_031182:17986    | Tcfap4     | DOWNSTREAM             | 0.465                                           | 0.579                            | 1939.95             | 1122.57             | 0.269                            | 1486.61             | 399.77              |
| A_68_P30510783 | chr16:4558483-4558531                             | NM_031182:1214     | Tcfap4     | INSIDE                 | 0.224                                           | 0.644                            | 1002.74             | 645.57              | 0.144                            | 820.88              | 118.54              |
| A_68_P30510784 | chr16:4558577-4558621                             | NM_031182:1122     | Tcfap4     | INSIDE                 | 0.244                                           | 0.518                            | 1220.51             | 631.83              | 0.126                            | 1044.20             | 131.77              |
| A_68_P30510785 | chr16:4558716-4558760                             | NM_031182:982      | Tcfap4     | INSIDE                 | 0.509                                           | 0.429                            | 2293.06             | 983.82              | 0.218                            | 1732.25             | 378.00              |
| A_68_P30510786 | chr16:4558818-4558862                             | NM_031182:880      | Tcfap4     | INSIDE                 | 0.094                                           | 0.496                            | 3581.30             | 1774.60             | 0.046                            | 2543.23             | 118.19              |
| A_68_P30510787 | chr16:4558890-4558934                             | NM_031182:808      | Tcfap4     | INSIDE                 | 0.424                                           | 0.614                            | 7233.98             | 4440.62             | 0.260                            | 4912.91             | 1279.00             |
| A_68_P30510788 | chr16:4558960-4559004                             | NM_031182:738      | Tcfap4     | INSIDE                 | 0.224                                           | 0.646                            | 4333.57             | 2798.33             | 0.145                            | 3231.19             | 467.51              |
| A_68_P30486394 | chr15:100382394-100382438                         | NM_033476:-38      | Tcfcp2     | PROMOTER               | 0.199                                           | 0.611                            | 2300.39             | 1405.40             | 0.122                            | 1870.95             | 227.84              |
| A_68_P20552784 | chr1:120524752-120524796                          | NM_023755:253      | Tcfcp211   | INSIDE                 | 0.435                                           | 0.553                            | 1832.94             | 1014.46             | 0.241                            | 1488.49             | 358.16              |
| A_68_P31213960 | chr17:47874243-47874287                           | NM_001161723:-615  | Tcfepb     | PROMOTER               | 0.659                                           | 0.682                            | 2676.72             | 1826.49             | 0.450                            | 2273.36             | 1022.84             |
| A_68_P31213967 | chr17:47875064-47875108                           | NM_001161723:207   | Tcfepb     | INSIDE                 | 0.177                                           | 0.697                            | 1858.49             | 1295.83             | 0.123                            | 1342.55             | 165.59              |
| A_68_P22336392 | chr3:93247658-93247702                            | NM_001163098:1429  | Tchh       | INSIDE                 | 0.272                                           | 0.510                            | 1225.25             | 625.43              | 0.139                            | 869.52              | 120.72              |
| A_68_P22336394 | chr3:93247847-93247891                            | NM_001163098:1617  | Tchh       | INSIDE                 | 0.114                                           | 0.530                            | 2607.52             | 1382.63             | 0.060                            | 1967.41             | 118.88              |
| A_68_P22336402 | chr3:93248746-93248790                            | NM_001163098:2517  | Tchh       | INSIDE                 | 0.618                                           | 0.715                            | 1596.61             | 1141.44             | 0.442                            | 1243.86             | 549.45              |
| A_68_P22336405 | chr3:93249236-93249280                            | NM_001163098:3007  | Tchh       | INSIDE                 | 0.461                                           | 0.638                            | 1908.11             | 1216.85             | 0.294                            | 1482.56             | 435.74              |
| A_68_P22336416 | chr3:93250348-93250392                            | NM_001163098:4119  | Tchh       | INSIDE                 | 0.320                                           | 0.503                            | 1545.93             | 777.32              | 0.161                            | 1305.03             | 210.06              |
| A_68_P22336429 | chr3:93251869-93251913                            | NM_001163098:5639  | Tchh       | INSIDE                 | 0.285                                           | 0.544                            | 3864.49             | 2102.53             | 0.155                            | 2807.29             | 435.78              |
| A_68_P24005588 | chr5:115158042-115158088                          | NM_029992:277      | Tchp       | INSIDE                 | 0.082                                           | 0.733                            | 2868.20             | 2103.62             | 0.060                            | 2061.91             | 124.42              |
| A_68_P31120331 | chr17:28216591-28216635                           | NM_013687:917      | Tcp11      | INSIDE                 | 0.669                                           | 0.714                            | 1324.09             | 945.25              | 0.477                            | 1091.45             | 521.14              |
| A_68_P26814193 | chr9:108208141-108208185                          | NM_133986:120      | Tcta       | INSIDE                 | 0.154                                           | 0.478                            | 2565.09             | 1226.13             | 0.073                            | 1787.83             | 131.22              |
| A_68_P30652355 | chr16:32420130-32420180                           | NM_025329:367      | Tctex1d2   | INSIDE                 | 0.278                                           | 0.415                            | 1761.15             | 730.98              | 0.115                            | 1293.59             | 149.40              |
| A_68_P32203265 | chr19:56896867-56896911                           | NM_001002238:-3810 | Tdrl1      | DIVERGENT_PROMOTER     | 0.327                                           | 0.652                            | 2194.29             | 1431.00             | 0.214                            | 1674.06             | 357.47              |
| A_68_P22338873 | chr3:94216925-94216977                            | NM_028307:-289     | Tdrkh      | PROMOTER               | 0.345                                           | 0.614                            | 1227.17             | 753.72              | 0.212                            | 819.41              | 173.68              |
| A_68_P22338874 | chr3:94217114-94217158                            | NM_028307:-103     | Tdrkh      | PROMOTER               | 0.314                                           | 0.599                            | 1901.27             | 1139.41             | 0.188                            | 1400.04             | 263.38              |
| A_68_P22338876 | chr3:94217322-94217366                            | NM_028307:105      | Tdrkh      | INSIDE                 | 0.156                                           | 1.368                            | 9561.43             | 13081.72            | 0.214                            | 6500.13             | 1391.10             |
| A_68_P25425954 | chr7:119822563-119822607                          | NM_001166584:-249  | Tead1      | PROMOTER               | 0.591                                           | 0.696                            | 1116.05             | 776.37              | 0.411                            | 827.84              | 340.06              |
| A_68_P25425956 | chr7:119822840-119822884                          | NM_001166584:29    | Tead1      | INSIDE                 | 0.344                                           | 0.469                            | 1119.16             | 524.58              | 0.161                            | 856.78              | 138.13              |
| A_68_P25091864 | chr7:52471284-52471328                            | NM_011565:184      | Tead2      | INSIDE                 | 0.236                                           | 1.385                            | 3920.49             | 5428.73             | 0.327                            | 2823.33             | 923.91              |
| A_68_P31121931 | chr7:28478403-28478447                            | NM_001204156:8867  | Tead3      | INSIDE                 | 0.543                                           | 0.478                            | 1439.41             | 687.77              | 0.260                            | 1169.74             | 303.73              |
| A_68_P24838282 | chr6:128250695-128250739                          | NM_001080979:115   | Tead4      | INSIDE                 | 0.318                                           | 0.286                            | 7210.52             | 2061.40             | 0.091                            | 5771.82             | 524.63              |
| A_68_P24160097 | chr5:144984259-144984304                          | NM_027410:166      | Tecpr1     | INSIDE                 | 0.240                                           | 0.586                            | 2682.15             | 1571.99             | 0.141                            | 1836.21             | 258.47              |
| A_68_P26015637 | chr8:86118596-86118640                            | NM_027179:-228     | Tecr       | PROMOTER               | 0.580                                           | 0.569                            | 1785.36             | 1015.03             | 0.330                            | 1281.21             | 422.42              |
| A_68_P30379763 | chr15:81642166-81642210                           | NM_017376:345      | Tef        | INSIDE                 | 0.577                                           | 4.365                            | 785.27              | 3427.49             | 2.518                            | 798.52              | 2010.95             |
| A_68_P31104079 | chr17:25611509-25611553                           | NM_027951:2996     | Tekt4      | INSIDE                 | 0.290                                           | 0.538                            | 2290.27             | 1232.73             | 0.156                            | 1651.83             | 258.06              |
| A_68_P30542067 | chr16:10395304-10395348                           | NM_001099275:215   | Tekt5      | INSIDE                 | 0.664                                           | 0.689                            | 1815.48             | 1251.03             | 0.458                            | 1387.89             | 635.07              |
| A_68_P31101668 | chr17:25252658-25252702                           | NM_027880:170      | Telo2      | INSIDE                 | 0.278                                           | 0.569                            | 902.12              | 513.41              | 0.158                            | 731.53              | 115.79              |
| A_68_P26082617 | chr8:97844517-97844561                            | NM_028532:9026     | Tepp       | INSIDE                 | 0.247                                           | 0.715                            | 3769.19             | 2693.51             | 0.176                            | 2829.49             | 499.21              |
| A_68_P26082618 | chr8:97844602-97844646                            | NM_028532:9112     | Tepp       | INSIDE                 | 0.218                                           | 0.488                            | 1408.76             | 687.38              | 0.106                            | 1097.57             | 116.57              |

| ProbeName      | Target position of probe on CpG island microarray | TargetID          | GeneSymbol | CpG island Description | Ratio of relative methylation (TiO2-NP/Vehicle) | Sham group                       |                     |                     | TiO <sub>2</sub> -H group        |                     |                     |
|----------------|---------------------------------------------------|-------------------|------------|------------------------|-------------------------------------------------|----------------------------------|---------------------|---------------------|----------------------------------|---------------------|---------------------|
|                |                                                   |                   |            |                        |                                                 | Relative methylation (Cy-5/Cy-3) | Cy-3 signal (Input) | Cy-5 signal (MeDIP) | Relative methylation (Cy-5/Cy-3) | Cy-3 signal (Input) | Cy-5 signal (MeDIP) |
| A_68_P22349233 | chr3:96218809-96218853                            | NR_001579:-74     | Terc       | PROMOTER               | 0.276                                           | 0.669                            | 2629.17             | 1759.65             | 0.185                            | 2121.83             | 392.50              |
| A_68_P20052698 | chr1:15795876-15795920                            | NM_009352:160     | Terf1      | INSIDE                 | 0.453                                           | 0.461                            | 1961.90             | 903.56              | 0.209                            | 1491.05             | 311.09              |
| A_68_P26143093 | chr8:109619905-109619949                          | NM_009353:519     | Terf2      | INSIDE                 | 0.203                                           | 0.656                            | 2194.17             | 1440.32             | 0.133                            | 1586.25             | 211.56              |
| A_68_P29141046 | chr13:73764254-73764302                           | NM_009354:-170    | Tert       | PROMOTER               | 0.265                                           | 1.714                            | 4654.65             | 7976.14             | 0.454                            | 2975.72             | 1350.69             |
| A_68_P29141047 | chr13:73764398-73764442                           | NM_009354:-28     | Tert       | PROMOTER               | 0.164                                           | 1.730                            | 2630.18             | 4549.43             | 0.284                            | 1706.64             | 484.87              |
| A_68_P24265240 | chr6:17015458-17015502                            | NM_207176:332     | Tes        | INSIDE                 | 0.585                                           | 0.500                            | 1068.22             | 534.25              | 0.293                            | 888.76              | 260.11              |
| A_68_P22871718 | chr4:43455695-43455739                            | NM_011571:568     | Tesk1      | INSIDE                 | 0.358                                           | 0.440                            | 1213.47             | 533.81              | 0.157                            | 959.00              | 150.94              |
| A_68_P22871719 | chr4:43455836-43455880                            | NM_011571:710     | Tesk1      | INSIDE                 | 0.208                                           | 0.547                            | 1291.16             | 706.00              | 0.114                            | 1078.75             | 122.79              |
| A_68_P27188397 | chr10:62349624-62349668                           | NM_027384:-6884   | Tet1       | PROMOTER               | 0.580                                           | 0.470                            | 1401.47             | 658.65              | 0.273                            | 1197.01             | 326.31              |
| A_68_P27188402 | chr10:62350034-62350078                           | NM_027384:-7294   | Tet1       | PROMOTER               | 0.240                                           | 0.498                            | 1184.98             | 590.54              | 0.119                            | 979.41              | 116.97              |
| A_68_P24593530 | chr6:83391357-83391401                            | NM_183138:294     | Tet3       | INSIDE                 | 0.268                                           | 0.553                            | 2332.34             | 1290.74             | 0.148                            | 1475.98             | 218.98              |
| A_68_P28102660 | chr11:106473862-106473908                         | NM_198292:360     | Tex2       | INSIDE                 | 0.093                                           | 0.613                            | 3115.84             | 1908.84             | 0.057                            | 2226.23             | 127.47              |
| A_68_P26804660 | chr9:106587656-106587700                          | NM_011573:320     | Tex264     | INSIDE                 | 0.608                                           | 0.587                            | 1043.54             | 612.71              | 0.357                            | 872.80              | 311.83              |
| A_68_P26804665 | chr9:106588204-106588248                          | NM_011573:-228    | Tex264     | PROMOTER               | 0.384                                           | 0.535                            | 3120.21             | 1668.26             | 0.205                            | 2397.02             | 492.12              |
| A_68_P26628115 | chr9:72339784-72339828                            | NM_009359:-43     | Tex9       | PROMOTER               | 0.518                                           | 0.579                            | 922.11              | 534.25              | 0.300                            | 796.02              | 239.04              |
| A_68_P27234342 | chr10:70700324-70700368                           | NM_009360:446     | Tfam       | INSIDE                 | 0.158                                           | 0.561                            | 3070.69             | 1723.97             | 0.089                            | 2439.78             | 216.40              |
| A_68_P31006134 | chr17:3557457-3557501                             | NM_146074:235     | Tfb1m      | INSIDE                 | 0.598                                           | 0.658                            | 2450.16             | 1611.56             | 0.393                            | 1941.65             | 763.90              |
| A_68_P31006135 | chr17:3557579-3557623                             | NM_146074:113     | Tfb1m      | INSIDE                 | 0.232                                           | 0.563                            | 1307.09             | 735.85              | 0.131                            | 902.22              | 117.79              |
| A_68_P20870808 | chr1:181476368-181476413                          | NM_008249:8       | Tfb2m      | INSIDE                 | 0.121                                           | 0.557                            | 3069.15             | 1710.86             | 0.068                            | 2181.28             | 147.28              |
| A_68_P30782603 | chr16:56717699-56717743                           | NM_019678:-253    | Tfg        | PROMOTER               | 0.377                                           | 0.639                            | 1044.09             | 666.87              | 0.241                            | 911.00              | 219.11              |
| A_68_P23991446 | chr5:112755370-112755414                          | NM_018783:4       | Tfip11     | INSIDE                 | 0.360                                           | 0.584                            | 1880.97             | 1097.98             | 0.210                            | 1351.56             | 284.16              |
| A_68_P24946431 | chr7:3581260-3581308                              | NM_023524:202     | Tfpt       | INSIDE                 | 0.280                                           | 0.468                            | 1175.23             | 549.55              | 0.131                            | 910.45              | 119.17              |
| A_68_P30653345 | chr16:32608966-32609010                           | NM_011638:7       | Tfrc       | INSIDE                 | 0.280                                           | 0.544                            | 1547.28             | 841.30              | 0.152                            | 1262.45             | 192.09              |
| A_68_P30653349 | chr16:32609415-32609459                           | NM_011638:455     | Tfrc       | INSIDE                 | 0.361                                           | 0.620                            | 1844.75             | 1144.05             | 0.224                            | 1438.90             | 321.89              |
| A_68_P30653350 | chr16:32609484-32609540                           | NM_011638:531     | Tfrc       | INSIDE                 | 0.239                                           | 0.555                            | 1029.36             | 571.46              | 0.132                            | 871.59              | 115.44              |
| A_68_P24608768 | chr6:86145664-86145708                            | NM_031199:442     | Tgfa       | INSIDE                 | 0.201                                           | 0.461                            | 1548.42             | 713.33              | 0.092                            | 1238.73             | 114.54              |
| A_68_P20908721 | chr1:188528261-188528311                          | NM_009367:1585    | Tgfb2      | INSIDE                 | 0.181                                           | 0.709                            | 1323.93             | 938.52              | 0.128                            | 953.64              | 122.07              |
| A_68_P22894258 | chr4:47365465-47365509                            | NM_009370:-690    | Tgfb1      | PROMOTER               | 0.334                                           | 0.574                            | 1331.23             | 764.62              | 0.192                            | 892.00              | 171.18              |
| A_68_P22894259 | chr4:47365606-47365650                            | NM_009370:-548    | Tgfb1      | PROMOTER               | 0.149                                           | 1.682                            | 4487.99             | 7547.65             | 0.251                            | 2946.64             | 740.06              |
| A_68_P22894260 | chr4:47365694-47365738                            | NM_009370:-460    | Tgfb1      | PROMOTER               | 0.055                                           | 1.745                            | 2338.09             | 4078.79             | 0.095                            | 1466.34             | 139.55              |
| A_68_P22894262 | chr4:47366025-47366069                            | NM_009370:-130    | Tgfb1      | PROMOTER               | 0.573                                           | 0.726                            | 2531.27             | 1837.14             | 0.416                            | 2232.68             | 929.32              |
| A_68_P31331157 | chr17:71203092-71203136                           | NM_001164074:-242 | Tgfl       | PROMOTER               | 0.297                                           | 0.622                            | 1196.16             | 744.42              | 0.185                            | 981.70              | 181.46              |
| A_68_P24542638 | chr6:72566666-72566710                            | NM_009444:54      | Tgoln2     | INSIDE                 | 0.618                                           | 0.711                            | 2406.13             | 1709.67             | 0.439                            | 1943.97             | 854.01              |
| A_68_P24542639 | chr6:72566738-72566782                            | NM_009444:-18     | Tgoln2     | PROMOTER               | 0.565                                           | 0.570                            | 1142.68             | 651.42              | 0.322                            | 947.30              | 305.29              |
| A_68_P21875215 | chr2:174241468-174241512                          | NM_020580:186     | Th11       | INSIDE                 | 0.277                                           | 0.694                            | 1417.70             | 983.20              | 0.192                            | 1072.06             | 206.01              |
| A_68_P26136326 | chr8:108379372-108379416                          | NM_021513:392     | Thap11     | INSIDE                 | 0.612                                           | 0.724                            | 1593.83             | 1153.63             | 0.443                            | 1325.04             | 586.55              |
| A_68_P23891540 | chr5:92391970-92392018                            | NR_028429:87      | Thap6      | INSIDE                 | 0.217                                           | 0.598                            | 1218.87             | 728.40              | 0.130                            | 950.96              | 123.28              |
| A_68_P30574321 | chr16:17530648-17530693                           | NM_026909:475     | Thap7      | INSIDE                 | 0.321                                           | 0.704                            | 1900.52             | 1338.88             | 0.226                            | 1359.50             | 307.82              |
| A_68_P30574323 | chr16:17530866-17530910                           | NM_026909:257     | Thap7      | INSIDE                 | 0.569                                           | 0.514                            | 1312.67             | 675.16              | 0.293                            | 1058.94             | 310.03              |
| A_68_P27765165 | chr11:45768563-45768620                           | NM_001080969:405  | Thg11      | INSIDE                 | 0.271                                           | 0.507                            | 1104.46             | 559.49              | 0.138                            | 839.87              | 115.48              |
| A_68_P24534825 | chr6:71094013-71094057                            | NM_001033929:336  | Thns12     | INSIDE                 | 0.550                                           | 0.529                            | 2103.11             | 1112.05             | 0.291                            | 1601.07             | 465.56              |
| A_68_P31487558 | chr18:9957999-9958043                             | NM_153552:-157    | Thoc1      | PROMOTER               | 0.649                                           | 0.503                            | 1773.60             | 891.31              | 0.326                            | 1342.73             | 437.60              |
| A_68_P32340124 | chrX:39264668-39264712                            | NM_001033422:388  | Thoc2      | INSIDE                 | 0.085                                           | 2.072                            | 1610.88             | 3338.30             | 0.176                            | 677.99              | 119.38              |
| A_68_P32340125 | chrX:39264784-39264828                            | NM_001033422:272  | Thoc2      | INSIDE                 | 0.469                                           | 1.577                            | 6527.99             | 10294.78            | 0.740                            | 2716.10             | 2010.36             |

| ProbeName      | Target position of probe on CpG island microarray | TargetID         | GeneSymbol | CpG island Description | Ratio of relative methylation (TiO2-NP/Vehicle) | Sham group                       |                     |                     | TiO <sub>2</sub> -H group        |                     |                     |
|----------------|---------------------------------------------------|------------------|------------|------------------------|-------------------------------------------------|----------------------------------|---------------------|---------------------|----------------------------------|---------------------|---------------------|
|                |                                                   |                  |            |                        |                                                 | Relative methylation (Cy-5/Cy-3) | Cy-3 signal (Input) | Cy-5 signal (MeDIP) | Relative methylation (Cy-5/Cy-3) | Cy-3 signal (Input) | Cy-5 signal (MeDIP) |
| A_68_P32340126 | chrX:39264963-39265012                            | NM_001033422:91  | Thoc2      | INSIDE                 | 0.109                                           | 3.117                            | 2622.57             | 8173.43             | 0.341                            | 866.85              | 295.27              |
| A_68_P32340127 | chrX:39265129-39265173                            | NM_001033422:-72 | Thoc2      | PROMOTER               | 0.294                                           | 2.007                            | 3746.06             | 7518.66             | 0.590                            | 1500.11             | 884.89              |
| A_68_P27560196 | chr11:4795414-4795458                             | NM_172438:91     | Thoc5      | INSIDE                 | 0.499                                           | 0.703                            | 1912.31             | 1344.39             | 0.351                            | 1524.05             | 534.85              |
| A_68_P31092955 | chr17:23810698-23810747                           | NM_001008425:15  | Thoc6      | INSIDE                 | 0.213                                           | 0.505                            | 1823.42             | 921.40              | 0.108                            | 1354.68             | 145.90              |
| A_68_P31092956 | chr17:23810793-23810838                           | NM_001008425:-78 | Thoc6      | PROMOTER               | 0.443                                           | 0.613                            | 2258.70             | 1383.83             | 0.271                            | 1685.84             | 457.61              |
| A_68_P29418914 | chr14:14793253-14793298                           | NM_025435:464    | Thoc7      | INSIDE                 | 0.257                                           | 1.810                            | 1746.58             | 3161.01             | 0.465                            | 1344.66             | 625.92              |
| A_68_P29418923 | chr14:14794239-14794283                           | NM_025435:-521   | Thoc7      | PROMOTER               | 0.407                                           | 0.537                            | 1962.94             | 1053.66             | 0.218                            | 1739.95             | 379.84              |
| A_68_P28058193 | chr11:98603344-98603393                           | NM_178060:182    | Thra       | INSIDE                 | 0.281                                           | 0.339                            | 1682.81             | 571.28              | 0.095                            | 1271.26             | 121.06              |
| A_68_P23278807 | chr4:125879742-125879788                          | NM_146153:190    | Thrap3     | INSIDE                 | 0.169                                           | 0.589                            | 2022.15             | 1191.30             | 0.100                            | 1432.91             | 142.76              |
| A_68_P25465170 | chr7:126863806-126863854                          | NM_145585:449    | Thumpd1    | INSIDE                 | 0.220                                           | 0.546                            | 1174.82             | 641.66              | 0.120                            | 972.79              | 116.95              |
| A_68_P25465171 | chr7:126863923-126863967                          | NM_145585:335    | Thumpd1    | INSIDE                 | 0.153                                           | 0.457                            | 2540.49             | 1162.22             | 0.070                            | 1716.53             | 120.47              |
| A_68_P26465329 | chr9:43851804-43851848                            | NM_009382:360    | Thy1       | INSIDE                 | 0.294                                           | 0.683                            | 1981.00             | 1352.86             | 0.201                            | 1441.04             | 289.23              |
| A_68_P25510944 | chr7:135603768-135603821                          | NM_009383:1233   | Tial1      | INSIDE                 | 0.219                                           | 0.551                            | 1134.54             | 625.30              | 0.120                            | 977.11              | 117.70              |
| A_68_P25510946 | chr7:135603923-135603972                          | NM_009383:1080   | Tial1      | INSIDE                 | 0.176                                           | 0.540                            | 1590.33             | 858.61              | 0.095                            | 1259.21             | 119.69              |
| A_68_P25510961 | chr7:135605591-135605635                          | NM_009383:-585   | Tial1      | PROMOTER               | 0.368                                           | 0.536                            | 1014.76             | 543.51              | 0.197                            | 867.11              | 170.87              |
| A_68_P31004585 | chr17:3327130-3327174                             | NM_001122998:580 | Tiam2      | INSIDE                 | 0.334                                           | 0.526                            | 1005.00             | 528.23              | 0.176                            | 833.81              | 146.50              |
| A_68_P31931515 | chr19:5893867-5893911                             | NM_198634:219    | Tigd3      | INSIDE                 | 0.291                                           | 0.584                            | 1366.26             | 798.07              | 0.170                            | 1106.96             | 187.96              |
| A_68_P30344891 | chr15:75741091-75741135                           | NM_178646:948    | Tigd5      | INSIDE                 | 0.402                                           | 0.694                            | 2910.45             | 2020.64             | 0.279                            | 2088.38             | 583.52              |
| A_68_P30344892 | chr15:75741160-75741204                           | NM_178646:1018   | Tigd5      | INSIDE                 | 0.340                                           | 0.640                            | 3566.60             | 2282.79             | 0.218                            | 2745.60             | 597.69              |
| A_68_P27286214 | chr10:80363023-80363067                           | NM_013895:670    | Timm13     | INSIDE                 | 0.305                                           | 0.591                            | 2288.03             | 1351.38             | 0.180                            | 1692.35             | 305.26              |
| A_68_P27286219 | chr10:80363610-80363656                           | NM_013895:82     | Timm13     | INSIDE                 | 0.636                                           | 0.464                            | 1142.84             | 529.86              | 0.295                            | 897.89              | 264.69              |
| A_68_P27286220 | chr10:80363685-80363729                           | NM_013895:8      | Timm13     | INSIDE                 | 0.192                                           | 0.394                            | 2090.39             | 823.04              | 0.075                            | 1737.21             | 130.99              |
| A_68_P20638618 | chr1:137210111-137210155                          | NM_011590:182    | Timm17a    | INSIDE                 | 0.549                                           | 0.528                            | 2434.31             | 1285.29             | 0.290                            | 1764.74             | 511.79              |
| A_68_P20638619 | chr1:137210199-137210243                          | NM_011590:94     | Timm17a    | INSIDE                 | 0.370                                           | 0.694                            | 1718.46             | 1192.95             | 0.257                            | 1320.26             | 339.28              |
| A_68_P20638621 | chr1:137210401-137210445                          | NM_011590:-108   | Timm17a    | PROMOTER               | 0.138                                           | 0.737                            | 4696.09             | 3461.85             | 0.102                            | 3208.97             | 325.98              |
| A_68_P25617012 | chr8:4275589-4275633                              | NM_011592:295    | Timm44     | INSIDE                 | 0.389                                           | 0.352                            | 1784.11             | 628.53              | 0.137                            | 1462.47             | 200.17              |
| A_68_P25617013 | chr8:4275737-4275784                              | NM_011592:145    | Timm44     | INSIDE                 | 0.207                                           | 1.605                            | 1445.75             | 2321.02             | 0.333                            | 1021.57             | 339.75              |
| A_68_P25617015 | chr8:4275885-4275929                              | NM_011592:-1     | Timm44     | PROMOTER               | 0.418                                           | 0.466                            | 1571.46             | 731.62              | 0.194                            | 1206.45             | 234.55              |
| A_68_P25021123 | chr7:29097166-29097212                            | NM_025616:-123   | Timm50     | PROMOTER               | 0.138                                           | 0.611                            | 3272.01             | 1999.33             | 0.084                            | 2232.88             | 188.39              |
| A_68_P26504538 | chr9:50412116-50412160                            | NM_013897:133    | Timm8b     | INSIDE                 | 0.324                                           | 0.599                            | 3069.78             | 1838.08             | 0.194                            | 2210.71             | 428.87              |
| A_68_P26504539 | chr9:50412320-50412364                            | NM_013897:337    | Timm8b     | INSIDE                 | 0.121                                           | 0.619                            | 2527.45             | 1565.30             | 0.075                            | 1687.83             | 126.48              |
| A_68_P26504540 | chr9:50412429-50412473                            | NM_013897:445    | Timm8b     | INSIDE                 | 0.528                                           | 0.635                            | 957.49              | 607.85              | 0.335                            | 808.13              | 270.70              |
| A_68_P28524523 | chr12:72237247-72237292                           | NM_001024853:393 | Timm9      | INSIDE                 | 0.274                                           | 0.417                            | 1285.30             | 536.13              | 0.114                            | 1046.67             | 119.56              |
| A_68_P27313251 | chr10:85763083-85763128                           | NM_011595:-51    | Timp3      | PROMOTER               | 0.313                                           | 0.553                            | 2251.16             | 1244.53             | 0.173                            | 1867.17             | 322.71              |
| A_68_P29619287 | chr14:56300293-56300337                           | NM_145705:340    | Tinf2      | INSIDE                 | 0.290                                           | 0.359                            | 1619.23             | 581.11              | 0.104                            | 1191.14             | 123.90              |
| A_68_P22200380 | chr3:65331656-65331707                            | NM_178892:-687   | Tiparp     | PROMOTER               | 0.387                                           | 0.468                            | 1309.30             | 612.30              | 0.181                            | 1067.33             | 193.00              |
| A_68_P22200389 | chr3:65332655-65332699                            | NM_178892:308    | Tiparp     | INSIDE                 | 0.273                                           | 0.582                            | 1856.08             | 1080.83             | 0.159                            | 1515.63             | 241.15              |
| A_68_P26421200 | chr9:35007442-35007486                            | NM_001177847:26  | Tirap      | INSIDE                 | 0.194                                           | 0.332                            | 2449.66             | 813.48              | 0.064                            | 1934.19             | 124.68              |
| A_68_P26421202 | chr9:35007602-35007646                            | NM_001177846:-74 | Tirap      | PROMOTER               | 0.657                                           | 0.573                            | 1140.89             | 653.58              | 0.376                            | 972.80              | 366.21              |
| A_68_P29506485 | chr14:31362134-31362189                           | NM_009388:-173   | Tkt        | PROMOTER               | 0.232                                           | 0.524                            | 1355.15             | 709.45              | 0.122                            | 979.44              | 119.11              |
| A_68_P23012911 | chr4:71860767-71860811                            | NM_011599:1165   | Tle1       | INSIDE                 | 0.370                                           | 0.453                            | 1503.64             | 681.47              | 0.167                            | 1141.27             | 191.14              |
| A_68_P23012918 | chr4:71861537-71861581                            | NM_011599:395    | Tle1       | INSIDE                 | 0.251                                           | 0.423                            | 1877.73             | 793.71              | 0.106                            | 1584.44             | 168.14              |
| A_68_P27290579 | chr10:81033785-81033829                           | NM_019725:-4470  | Tle2       | PROMOTER               | 0.514                                           | 0.602                            | 3634.26             | 2189.17             | 0.310                            | 2801.37             | 867.32              |
| A_68_P27290580 | chr10:81033862-81033910                           | NM_019725:-4390  | Tle2       | PROMOTER               | 0.259                                           | 0.485                            | 1276.90             | 619.11              | 0.125                            | 922.00              | 115.67              |

| ProbeName      | Target position of probe on CpG island microarray | TargetID          | GeneSymbol | CpG island Description | Ratio of relative methylation (TiO2-NP/Vehicle) | Sham group                       |                     |                     | TiO <sub>2</sub> -H group        |                     |                     |
|----------------|---------------------------------------------------|-------------------|------------|------------------------|-------------------------------------------------|----------------------------------|---------------------|---------------------|----------------------------------|---------------------|---------------------|
|                |                                                   |                   |            |                        |                                                 | Relative methylation (Cy-5/Cy-3) | Cy-3 signal (Input) | Cy-5 signal (MeDIP) | Relative methylation (Cy-5/Cy-3) | Cy-3 signal (Input) | Cy-5 signal (MeDIP) |
| A_68_P27290695 | chr10:81050342-81050386                           | NM_019725:12088   | Tle2       | INSIDE                 | 0.374                                           | 1.682                            | 2059.96             | 3464.99             | 0.629                            | 1360.62             | 856.45              |
| A_68_P26564381 | chr9:61220364-61220408                            | NM_001083927:214  | Tle3       | INSIDE                 | 0.338                                           | 0.459                            | 1810.81             | 831.47              | 0.155                            | 1404.45             | 218.13              |
| A_68_P26564383 | chr9:61220517-61220561                            | NM_001083927:366  | Tle3       | INSIDE                 | 0.343                                           | 0.567                            | 1269.16             | 720.00              | 0.195                            | 923.94              | 179.79              |
| A_68_P26564385 | chr9:61220827-61220871                            | NM_001083927:676  | Tle3       | INSIDE                 | 0.185                                           | 0.471                            | 1635.56             | 770.05              | 0.087                            | 1315.33             | 114.78              |
| A_68_P26564391 | chr9:61221577-61221621                            | NM_001083927:1426 | Tle3       | INSIDE                 | 0.224                                           | 0.561                            | 1189.27             | 667.05              | 0.126                            | 919.45              | 115.66              |
| A_68_P31969894 | chr19:14672643-14672687                           | NM_011600:-191    | Tle4       | PROMOTER               | 0.547                                           | 0.448                            | 1528.45             | 684.76              | 0.245                            | 1323.42             | 324.57              |
| A_68_P27290791 | chr10:81063724-81063768                           | NM_053254:-101    | Tle6       | DIVERGENT_PROMOTER     | 0.528                                           | 0.588                            | 1477.87             | 869.72              | 0.311                            | 1247.37             | 387.83              |
| A_68_P32113650 | chr19:41280684-41280728                           | NM_011904:558     | Tll2       | INSIDE                 | 0.556                                           | 0.416                            | 2341.26             | 973.11              | 0.231                            | 1880.05             | 434.34              |
| A_68_P32113654 | chr19:41281095-41281139                           | NM_011904:148     | Tll2       | INSIDE                 | 0.583                                           | 0.324                            | 1788.52             | 579.01              | 0.189                            | 1515.62             | 285.94              |
| A_68_P32113659 | chr19:41281622-41281669                           | NM_011904:-381    | Tll2       | PROMOTER               | 0.572                                           | 0.506                            | 1114.07             | 563.53              | 0.289                            | 704.58              | 203.69              |
| A_68_P32136713 | chr19:45218072-45218116                           | NM_021901:-7110   | Tlx1       | PROMOTER               | 0.388                                           | 0.621                            | 874.63              | 543.49              | 0.241                            | 668.88              | 161.26              |
| A_68_P32136793 | chr19:45227850-45227894                           | NM_021901:2668    | Tlx1       | INSIDE                 | 0.156                                           | 0.650                            | 5489.08             | 3566.55             | 0.101                            | 3798.26             | 384.68              |
| A_68_P32136797 | chr19:45228297-45228341                           | NM_021901:3114    | Tlx1       | INSIDE                 | 0.286                                           | 0.574                            | 1014.95             | 582.93              | 0.164                            | 765.50              | 125.67              |
| A_68_P24591244 | chr6:83019585-83019631                            | NM_009392:611     | Tlx2       | INSIDE                 | 0.211                                           | 1.357                            | 2903.42             | 3939.31             | 0.287                            | 2041.11             | 585.21              |
| A_68_P24591245 | chr6:83019654-83019698                            | NM_009392:543     | Tlx2       | INSIDE                 | 0.157                                           | 0.470                            | 2183.16             | 1026.90             | 0.074                            | 1742.88             | 128.83              |
| A_68_P24591254 | chr6:83020596-83020640                            | NM_009392:-399    | Tlx2       | DIVERGENT_PROMOTER     | 0.505                                           | 0.608                            | 3648.78             | 2219.56             | 0.307                            | 2681.41             | 823.38              |
| A_68_P24591261 | chr6:83021489-83021533                            | NM_009392:-1291   | Tlx2       | DIVERGENT_PROMOTER     | 0.628                                           | 0.418                            | 1760.59             | 735.92              | 0.262                            | 1491.91             | 391.43              |
| A_68_P27693350 | chr11:33102180-33102224                           | NM_019916:1386    | Tlx3       | INSIDE                 | 0.620                                           | 2.714                            | 6440.35             | 17478.25            | 1.684                            | 4142.87             | 6974.99             |
| A_68_P27693351 | chr11:33102254-33102303                           | NM_019916:1310    | Tlx3       | INSIDE                 | 0.642                                           | 4.137                            | 2358.31             | 9756.09             | 2.658                            | 1525.60             | 4054.39             |
| A_68_P27693353 | chr11:33102552-33102596                           | NM_019916:1014    | Tlx3       | INSIDE                 | 0.175                                           | 0.564                            | 1488.77             | 839.17              | 0.098                            | 1262.33             | 124.20              |
| A_68_P27693363 | chr11:33103831-33103878                           | NM_019916:-266    | Tlx3       | PROMOTER               | 0.221                                           | 0.453                            | 1492.55             | 676.80              | 0.100                            | 1176.29             | 117.83              |
| A_68_P27693368 | chr11:33104357-33104401                           | NM_019916:-790    | Tlx3       | PROMOTER               | 0.248                                           | 0.378                            | 1811.26             | 684.73              | 0.094                            | 1335.83             | 125.43              |
| A_68_P25724847 | chr8:26127928-26127972                            | NM_027194:268     | Tm2d2      | INSIDE                 | 0.143                                           | 0.479                            | 2579.85             | 1236.96             | 0.069                            | 1716.41             | 117.76              |
| A_68_P25724849 | chr8:26128143-26128187                            | NM_027194:482     | Tm2d2      | INSIDE                 | 0.506                                           | 0.472                            | 1720.20             | 811.15              | 0.239                            | 1345.00             | 321.23              |
| A_68_P25184109 | chr7:72838329-72838373                            | NM_026795:48      | Tm2d3      | INSIDE                 | 0.528                                           | 0.507                            | 2105.01             | 1066.45             | 0.268                            | 1576.93             | 421.87              |
| A_68_P25184111 | chr7:72838614-72838658                            | NM_026795:334     | Tm2d3      | INSIDE                 | 0.400                                           | 0.349                            | 1726.28             | 602.90              | 0.140                            | 1348.93             | 188.30              |
| A_68_P32114042 | chr19:41337768-41337812                           | NM_133352:704     | Tm9sf3     | INSIDE                 | 0.138                                           | 0.645                            | 1884.33             | 1215.40             | 0.089                            | 1308.07             | 116.34              |
| A_68_P27495880 | chr10:119645922-119645966                         | NM_026617:63      | Tmbim4     | INSIDE                 | 0.300                                           | 0.511                            | 3248.99             | 1658.80             | 0.153                            | 2547.88             | 389.68              |
| A_68_P30479872 | chr15:99223536-99223580                           | NM_001171035:-91  | Tmbim6     | PROMOTER               | 0.174                                           | 0.487                            | 2046.14             | 997.19              | 0.085                            | 1450.77             | 123.22              |
| A_68_P25459062 | chr7:125727948-125727992                          | NM_172476:230     | Tmc7       | INSIDE                 | 0.426                                           | 0.646                            | 1991.21             | 1286.03             | 0.275                            | 1416.69             | 389.44              |
| A_68_P28167195 | chr11:117644840-117644884                         | NM_001195088:891  | Tmc8       | INSIDE                 | 0.107                                           | 1.657                            | 2818.32             | 4670.59             | 0.178                            | 1961.96             | 348.37              |
| A_68_P20620971 | chr11:134257276-134257320                         | NM_178874:30560   | Tmcc2      | INSIDE                 | 0.611                                           | 3.302                            | 7294.02             | 24086.94            | 2.019                            | 4591.99             | 9270.90             |
| A_68_P20620972 | chr11:134257371-134257415                         | NM_178874:30466   | Tmcc2      | INSIDE                 | 0.623                                           | 3.221                            | 3614.04             | 11639.46            | 2.005                            | 2309.75             | 4632.10             |
| A_68_P20804420 | chr1:169238624-169238668                          | NM_001039483:-154 | Tmco1      | PROMOTER               | 0.623                                           | 0.542                            | 1321.98             | 716.47              | 0.338                            | 1038.25             | 350.73              |
| A_68_P26140912 | chr8:109207098-109207142                          | NM_173037:153     | Tmco7      | INSIDE                 | 0.483                                           | 0.570                            | 1022.10             | 582.28              | 0.275                            | 966.40              | 266.05              |
| A_68_P26347560 | chr9:21314771-21314829                            | NM_010744:-170    | Tmed1      | PROMOTER               | 0.187                                           | 0.661                            | 1363.31             | 901.58              | 0.124                            | 965.41              | 119.26              |
| A_68_P26713770 | chr9:89599836-89599880                            | NM_025360:23      | Tmed3      | INSIDE                 | 0.579                                           | 0.526                            | 1640.26             | 863.54              | 0.305                            | 1456.47             | 443.97              |
| A_68_P27567652 | chr11:6174705-6174749                             | NM_134020:114     | Tmed4      | INSIDE                 | 0.053                                           | 1.414                            | 2618.98             | 3702.34             | 0.075                            | 1607.48             | 120.52              |
| A_68_P23970433 | chr5:108561687-108561731                          | NM_028876:-98     | Tmed5      | DIVERGENT_PROMOTER     | 0.591                                           | 0.563                            | 1286.53             | 724.64              | 0.333                            | 1064.53             | 354.31              |
| A_68_P31677780 | chr18:46757146-46757190                           | NM_025698:21      | Tmed7      | INSIDE                 | 0.621                                           | 0.524                            | 1358.72             | 712.29              | 0.325                            | 1254.78             | 408.22              |
| A_68_P28614747 | chr12:88540890-88540934                           | NM_001033475:267  | Tmed8      | INSIDE                 | 0.388                                           | 0.434                            | 1256.05             | 544.69              | 0.168                            | 968.60              | 163.07              |
| A_68_P22900943 | chr4:48598769-48598813                            | NM_021436:726     | Tmeff1     | INSIDE                 | 0.177                                           | 2.012                            | 3128.67             | 6294.60             | 0.357                            | 2112.15             | 753.81              |
| A_68_P20218132 | chr1:50984895-50984939                            | NM_019790:550     | Tmeff2     | INSIDE                 | 0.188                                           | 0.533                            | 1535.11             | 818.16              | 0.100                            | 1207.67             | 121.27              |
| A_68_P28077838 | chr11:102017610-102017654                         | NM_029649:89      | Tmem101    | INSIDE                 | 0.211                                           | 0.537                            | 1320.23             | 708.54              | 0.113                            | 1019.49             | 115.32              |

| ProbeName      | Target position of probe on CpG island microarray | TargetID          | GeneSymbol | CpG island Description | Ratio of relative methylation (TiO2-NP/Vehicle) | Sham group                       |                     |                     | TiO <sub>2</sub> -H group        |                     |                     |
|----------------|---------------------------------------------------|-------------------|------------|------------------------|-------------------------------------------------|----------------------------------|---------------------|---------------------|----------------------------------|---------------------|---------------------|
|                |                                                   |                   |            |                        |                                                 | Relative methylation (Cy-5/Cy-3) | Cy-3 signal (Input) | Cy-5 signal (MeDIP) | Relative methylation (Cy-5/Cy-3) | Cy-3 signal (Input) | Cy-5 signal (MeDIP) |
| A_68_P24245776 | chr6:13020122-13020168                            | NM_027992:386     | Tmem106b   | INSIDE                 | 0.084                                           | 1.468                            | 2774.21             | 4072.07             | 0.124                            | 1719.67             | 213.26              |
| A_68_P27892867 | chr11:68884346-68884390                           | NM_025838:58      | Tmem107    | INSIDE                 | 0.202                                           | 0.364                            | 2524.41             | 919.11              | 0.074                            | 1745.29             | 128.44              |
| A_68_P27892868 | chr11:68884481-68884525                           | NM_025838:192     | Tmem107    | INSIDE                 | 0.313                                           | 0.504                            | 1047.51             | 528.00              | 0.158                            | 754.41              | 119.00              |
| A_68_P27892869 | chr11:68884583-68884627                           | NM_025838:294     | Tmem107    | INSIDE                 | 0.301                                           | 0.451                            | 1590.84             | 718.13              | 0.136                            | 1179.13             | 160.48              |
| A_68_P26787848 | chr9:103663928-103663974                          | NM_178638:217     | Tmem108    | INSIDE                 | 0.140                                           | 0.520                            | 2130.84             | 1107.00             | 0.073                            | 1676.23             | 121.91              |
| A_68_P26787851 | chr9:103664317-103664362                          | NM_178638:-172    | Tmem108    | PROMOTER               | 0.425                                           | 0.641                            | 1147.40             | 735.64              | 0.272                            | 971.25              | 264.61              |
| A_68_P27845263 | chr11:60691958-60692002                           | NM_001168507:560  | Tmem11     | INSIDE                 | 0.224                                           | 0.273                            | 5352.00             | 1462.81             | 0.061                            | 4513.81             | 276.73              |
| A_68_P27845268 | chr11:60692459-60692503                           | NM_001168507:60   | Tmem11     | INSIDE                 | 0.209                                           | 0.462                            | 1528.73             | 705.52              | 0.096                            | 1235.84             | 118.93              |
| A_68_P29508103 | chr14:31638633-31638679                           | NM_028839:-123    | Tmem110    | PROMOTER               | 0.474                                           | 0.641                            | 1383.44             | 886.42              | 0.304                            | 1115.78             | 338.92              |
| A_68_P24760052 | chr6:113481369-113481416                          | NM_175101:240     | Tmem111    | INSIDE                 | 0.334                                           | 0.605                            | 898.06              | 543.45              | 0.202                            | 731.96              | 147.75              |
| A_68_P26809359 | chr9:107436884-107436928                          | NM_019704:631     | Tmem115    | INSIDE                 | 0.388                                           | 0.468                            | 1517.33             | 710.48              | 0.182                            | 1120.49             | 203.73              |
| A_68_P26809364 | chr9:107437458-107437502                          | NM_019704:1205    | Tmem115    | INSIDE                 | 0.456                                           | 0.565                            | 1452.86             | 820.34              | 0.258                            | 1061.04             | 273.42              |
| A_68_P24117665 | chr5:136219665-136219716                          | NM_172541:352     | Tmem120a   | INSIDE                 | 0.229                                           | 0.419                            | 1817.89             | 762.17              | 0.096                            | 1454.78             | 139.72              |
| A_68_P24053751 | chr5:123526467-123526511                          | NM_001039723:205  | Tmem120b   | INSIDE                 | 0.263                                           | 0.472                            | 1791.91             | 846.46              | 0.124                            | 1346.43             | 167.23              |
| A_68_P24053752 | chr5:123526651-123526695                          | NM_001039723:389  | Tmem120b   | INSIDE                 | 0.633                                           | 0.294                            | 1826.77             | 537.00              | 0.186                            | 1374.88             | 255.77              |
| A_68_P21612305 | chr2:127073731-127073775                          | NM_175145:42      | Tmem127    | INSIDE                 | 0.619                                           | 0.476                            | 1722.70             | 819.82              | 0.295                            | 1265.67             | 372.99              |
| A_68_P21612309 | chr2:127074111-127074155                          | NM_175145:422     | Tmem127    | INSIDE                 | 0.228                                           | 0.615                            | 2264.80             | 1391.86             | 0.140                            | 2102.52             | 294.53              |
| A_68_P23590340 | chr5:34000396-34000440                            | NM_026698:63      | Tmem129    | INSIDE                 | 0.529                                           | 0.552                            | 1864.36             | 1029.78             | 0.292                            | 1445.13             | 422.26              |
| A_68_P23590341 | chr5:34000502-34000546                            | NM_026698:-43     | Tmem129    | DIVERGENT_PROMOTER     | 0.190                                           | 0.444                            | 1953.75             | 866.77              | 0.084                            | 1407.78             | 118.48              |
| A_68_P20151298 | chr1:36995764-36995812                            | NM_018872:584     | Tmem131    | INSIDE                 | 0.249                                           | 0.669                            | 936.42              | 626.07              | 0.166                            | 709.28              | 117.87              |
| A_68_P20151307 | chr1:36996847-36996891                            | NM_018872:-496    | Tmem131    | PROMOTER               | 0.334                                           | 0.430                            | 1668.97             | 718.43              | 0.144                            | 1315.97             | 188.97              |
| A_68_P24076583 | chr5:127721966-127722010                          | NM_175432:-207    | Tmem132c   | PROMOTER               | 0.253                                           | 0.405                            | 1679.29             | 680.32              | 0.102                            | 1140.43             | 116.78              |
| A_68_P24076587 | chr5:127722499-127722543                          | NM_175432:325     | Tmem132c   | INSIDE                 | 0.426                                           | 0.613                            | 2255.62             | 1381.85             | 0.261                            | 1684.29             | 439.13              |
| A_68_P25307027 | chr7:96487209-96487253                            | NM_028343:67      | Tmem135    | INSIDE                 | 0.292                                           | 0.414                            | 3962.50             | 1640.35             | 0.121                            | 3189.47             | 386.18              |
| A_68_P26459754 | chr9:42924375-42924419                            | NM_001034863:257  | Tmem136    | INSIDE                 | 0.507                                           | 0.585                            | 906.18              | 530.44              | 0.297                            | 705.80              | 209.28              |
| A_68_P25033088 | chr7:31514777-31514828                            | NM_027215:-249    | Tmem147    | PROMOTER               | 0.335                                           | 0.447                            | 1556.57             | 695.32              | 0.150                            | 1142.35             | 171.09              |
| A_68_P28975560 | chr13:41111770-41111814                           | NM_025387:174     | Tmem14c    | INSIDE                 | 0.280                                           | 0.644                            | 1020.72             | 657.77              | 0.181                            | 830.66              | 150.02              |
| A_68_P24541278 | chr6:72305613-72305657                            | NM_144916:158     | Tmem150a   | INSIDE                 | 0.150                                           | 0.711                            | 4004.53             | 2846.26             | 0.107                            | 2735.04             | 292.03              |
| A_68_P23928043 | chr5:100587765-100587824                          | NM_182841:1033    | Tmem150c   | INSIDE                 | 0.249                                           | 0.482                            | 1184.56             | 570.70              | 0.120                            | 965.70              | 115.97              |
| A_68_P31926780 | chr19:5082631-5082675                             | NM_001001885:2825 | Tmem151a   | INSIDE                 | 0.618                                           | 2.379                            | 950.57              | 2261.20             | 1.469                            | 759.18              | 1115.50             |
| A_68_P31926801 | chr19:5085238-5085283                             | NM_001001885:217  | Tmem151a   | INSIDE                 | 0.656                                           | 0.555                            | 1342.06             | 744.73              | 0.364                            | 1171.07             | 426.35              |
| A_68_P26894025 | chr9:123168633-123168677                          | NM_001002267:1253 | Tmem158    | INSIDE                 | 0.647                                           | 0.704                            | 1365.83             | 961.32              | 0.455                            | 1099.05             | 500.15              |
| A_68_P24981572 | chr7:17038213-17038257                            | NM_026938:107     | Tmem160    | INSIDE                 | 0.246                                           | 0.522                            | 1183.90             | 617.87              | 0.128                            | 901.40              | 115.50              |
| A_68_P29189772 | chr13:84361804-84361848                           | NM_175187:-74     | Tmem161b   | PROMOTER               | 0.330                                           | 0.647                            | 2401.18             | 1552.43             | 0.213                            | 1935.16             | 412.29              |
| A_68_P20596467 | chr1:129573905-129573949                          | NM_028135:672     | Tmem163    | INSIDE                 | 0.241                                           | 0.393                            | 1527.15             | 600.07              | 0.095                            | 1231.66             | 116.79              |
| A_68_P20596468 | chr1:129574040-129574084                          | NM_028135:536     | Tmem163    | INSIDE                 | 0.542                                           | 0.553                            | 1420.07             | 785.55              | 0.300                            | 1096.41             | 328.69              |
| A_68_P20596471 | chr1:129574483-129574527                          | NM_028135:94      | Tmem163    | INSIDE                 | 0.501                                           | 0.699                            | 1868.43             | 1306.48             | 0.350                            | 1589.87             | 557.18              |
| A_68_P20596472 | chr1:129574599-129574643                          | NM_028135:-22     | Tmem163    | PROMOTER               | 0.522                                           | 0.693                            | 1917.07             | 1328.71             | 0.362                            | 1445.26             | 522.72              |
| A_68_P20596473 | chr1:129574700-129574744                          | NM_028135:-124    | Tmem163    | PROMOTER               | 0.243                                           | 0.480                            | 1539.93             | 739.68              | 0.117                            | 1033.16             | 120.45              |
| A_68_P32709178 | chrX:139116482-139116526                          | NM_001199360:236  | Tmem164    | INSIDE                 | 0.457                                           | 1.485                            | 2611.94             | 3879.23             | 0.678                            | 1209.09             | 820.00              |
| A_68_P32709179 | chrX:139116571-139116615                          | NM_001199360:324  | Tmem164    | INSIDE                 | 0.111                                           | 3.814                            | 3928.28             | 14980.50            | 0.421                            | 1741.08             | 733.83              |
| A_68_P29211816 | chr13:90229293-90229337                           | NM_025335:43      | Tmem167    | INSIDE                 | 0.580                                           | 0.594                            | 2440.41             | 1450.01             | 0.345                            | 1874.10             | 646.27              |
| A_68_P29211817 | chr13:90229380-90229424                           | NM_025335:131     | Tmem167    | INSIDE                 | 0.657                                           | 0.513                            | 1928.84             | 989.87              | 0.337                            | 1446.10             | 487.23              |
| A_68_P29211818 | chr13:90229540-90229584                           | NM_025335:291     | Tmem167    | INSIDE                 | 0.627                                           | 0.577                            | 1913.81             | 1104.10             | 0.362                            | 1438.59             | 520.70              |

| ProbeName      | Target position of probe on CpG island microarray | TargetID           | GeneSymbol | CpG island Description | Ratio of relative methylation (TiO2-NP/Vehicle) | Sham group                       |                     |                     | TiO <sub>2</sub> -H group        |                     |                     |
|----------------|---------------------------------------------------|--------------------|------------|------------------------|-------------------------------------------------|----------------------------------|---------------------|---------------------|----------------------------------|---------------------|---------------------|
|                |                                                   |                    |            |                        |                                                 | Relative methylation (Cy-5/Cy-3) | Cy-3 signal (Input) | Cy-5 signal (MeDIP) | Relative methylation (Cy-5/Cy-3) | Cy-3 signal (Input) | Cy-5 signal (MeDIP) |
| A_68_P22413376 | chr3:108365347-108365394                          | NM_026198:14       | Tmem167b   | INSIDE                 | 0.125                                           | 0.560                            | 2408.04             | 1347.79             | 0.070                            | 1649.43             | 114.99              |
| A_68_P20559395 | chr1:121809675-121809721                          | NM_175106:47       | Tmem177    | INSIDE                 | 0.168                                           | 0.682                            | 1364.17             | 931.04              | 0.115                            | 1013.87             | 116.17              |
| A_68_P28750631 | chr12:113749099-113749143                         | NM_178915:251      | Tmem179    | INSIDE                 | 0.306                                           | 0.671                            | 1006.20             | 675.06              | 0.205                            | 723.82              | 148.36              |
| A_68_P28326654 | chr12:31269275-31269319                           | NM_172049:-11      | Tmem18     | PROMOTER               | 0.240                                           | 0.441                            | 2546.94             | 1123.07             | 0.106                            | 1977.26             | 209.37              |
| A_68_P28326655 | chr12:31269403-31269447                           | NM_172049:117      | Tmem18     | INSIDE                 | 0.305                                           | 0.464                            | 1240.91             | 575.78              | 0.141                            | 847.55              | 119.87              |
| A_68_P32143397 | chr19:46423267-46423311                           | NM_029186:-8081    | Tmem180    | PROMOTER               | 0.267                                           | 0.449                            | 1558.92             | 699.81              | 0.120                            | 1280.80             | 153.60              |
| A_68_P30572941 | chr16:17276967-17277011                           | NM_177473:596      | Tmem191c   | INSIDE                 | 0.438                                           | 0.513                            | 1018.12             | 522.72              | 0.225                            | 875.56              | 197.04              |
| A_68_P30572946 | chr16:17277489-17277533                           | NM_177473:1118     | Tmem191c   | INSIDE                 | 0.200                                           | 0.586                            | 1278.86             | 749.53              | 0.117                            | 1042.69             | 122.32              |
| A_68_P30572948 | chr16:17277681-17277725                           | NM_177473:1310     | Tmem191c   | INSIDE                 | 0.411                                           | 0.419                            | 1794.88             | 752.09              | 0.172                            | 1424.21             | 245.03              |
| A_68_P30572953 | chr16:17278195-17278239                           | NM_177473:1824     | Tmem191c   | INSIDE                 | 0.576                                           | 0.630                            | 1052.54             | 663.41              | 0.363                            | 834.60              | 302.99              |
| A_68_P20354344 | chr1:75476279-75476323                            | NM_177056:194      | Tmem198    | INSIDE                 | 0.530                                           | 0.438                            | 2068.17             | 905.45              | 0.232                            | 1589.86             | 369.02              |
| A_68_P20354345 | chr1:75476353-75476397                            | NM_177056:268      | Tmem198    | INSIDE                 | 0.360                                           | 0.629                            | 2696.14             | 1696.53             | 0.227                            | 1869.52             | 423.62              |
| A_68_P32008155 | chr19:21853166-21853210                           | NM_001033759:357   | Tmem2      | INSIDE                 | 0.334                                           | 0.550                            | 1254.36             | 689.67              | 0.184                            | 1016.56             | 186.79              |
| A_68_P23309106 | chr4:131476303-131476347                          | NM_001201367:-1361 | Tmem200b   | PROMOTER               | 0.551                                           | 0.672                            | 1491.79             | 1002.37             | 0.370                            | 1377.04             | 509.77              |
| A_68_P23309110 | chr4:131476820-131476864                          | NM_001201367:-843  | Tmem200b   | PROMOTER               | 0.311                                           | 0.637                            | 1115.05             | 710.08              | 0.198                            | 968.65              | 191.54              |
| A_68_P31320371 | chr17:69186413-69186457                           | NM_001206661:-41   | Tmem200c   | PROMOTER               | 0.468                                           | 0.599                            | 1833.77             | 1098.41             | 0.281                            | 1413.42             | 396.60              |
| A_68_P21070912 | chr2:25110973-25111017                            | NM_177344:36       | Tmem203    | INSIDE                 | 0.464                                           | 0.493                            | 1972.73             | 973.27              | 0.229                            | 1573.11             | 360.21              |
| A_68_P21070914 | chr2:25111268-25111312                            | NM_177344:332      | Tmem203    | INSIDE                 | 0.272                                           | 0.607                            | 3220.74             | 1954.68             | 0.165                            | 2146.38             | 354.06              |
| A_68_P20937460 | chr1:193149822-193149866                          | NM_025864:1        | Tmem206    | INSIDE                 | 0.500                                           | 0.606                            | 936.75              | 567.97              | 0.303                            | 746.32              | 226.24              |
| A_68_P20937462 | chr1:193150005-193150049                          | NM_025864:183      | Tmem206    | INSIDE                 | 0.388                                           | 0.710                            | 2924.08             | 2076.58             | 0.276                            | 2035.80             | 561.01              |
| A_68_P23575088 | chr5:31172158-31172203                            | NM_144525:161      | Tmem214    | INSIDE                 | 0.201                                           | 0.602                            | 2368.37             | 1425.35             | 0.121                            | 1444.20             | 174.87              |
| A_68_P22857437 | chr4:40420294-40420338                            | NM_001166009:154   | Tmem215    | INSIDE                 | 0.550                                           | 0.522                            | 1267.86             | 662.26              | 0.287                            | 1098.66             | 315.69              |
| A_68_P31951351 | chr19:10630157-10630201                           | NM_026798:550      | Tmem216    | INSIDE                 | 0.402                                           | 1.573                            | 3244.90             | 5105.54             | 0.633                            | 2382.85             | 1508.24             |
| A_68_P31128446 | chr17:29686489-29686534                           | NM_001162901:27    | Tmem217    | INSIDE                 | 0.060                                           | 1.482                            | 1893.32             | 2805.17             | 0.089                            | 1368.66             | 121.21              |
| A_68_P25957479 | chr8:74082789-74082840                            | NM_001100462:-44   | Tmem221    | PROMOTER               | 0.222                                           | 0.678                            | 1055.74             | 715.89              | 0.150                            | 820.15              | 123.37              |
| A_68_P23316764 | chr4:132833345-132833389                          | NM_025667:339      | Tmem222    | INSIDE                 | 0.253                                           | 0.501                            | 1394.89             | 698.19              | 0.127                            | 980.37              | 124.30              |
| A_68_P23316765 | chr4:132833435-132833480                          | NM_025667:248      | Tmem222    | INSIDE                 | 0.482                                           | 0.581                            | 2523.92             | 1466.58             | 0.280                            | 2020.68             | 566.19              |
| A_68_P24304147 | chr6:24906093-24906137                            | NM_177013:11       | Tmem229a   | INSIDE                 | 0.300                                           | 0.461                            | 2128.04             | 981.74              | 0.139                            | 1780.30             | 246.61              |
| A_68_P28567141 | chr12:80108301-80108345                           | NM_178745:-58      | Tmem229b   | PROMOTER               | 0.151                                           | 0.376                            | 2864.45             | 1077.51             | 0.057                            | 2224.36             | 126.66              |
| A_68_P26170969 | chr8:114457634-114457678                          | NM_001033321:35    | Tmem231    | INSIDE                 | 0.376                                           | 0.613                            | 1831.69             | 1122.60             | 0.230                            | 1433.18             | 330.11              |
| A_68_P26469618 | chr9:44607091-44607135                            | NM_027865:187      | Tmem25     | INSIDE                 | 0.232                                           | 0.566                            | 6036.59             | 3415.64             | 0.131                            | 4438.21             | 582.03              |
| A_68_P32741829 | chrX:146893580-146893628                          | NM_001164683:89    | Tmem29     | INSIDE                 | 0.397                                           | 0.687                            | 1246.33             | 855.90              | 0.273                            | 436.00              | 118.86              |
| A_68_P30595257 | chr16:21947236-21947280                           | NM_025693:367      | Tmem41a    | INSIDE                 | 0.413                                           | 0.705                            | 1335.69             | 942.24              | 0.291                            | 1141.59             | 332.69              |
| A_68_P30595258 | chr16:21947351-21947395                           | NM_025693:253      | Tmem41a    | INSIDE                 | 0.270                                           | 0.710                            | 4519.94             | 3208.62             | 0.192                            | 3570.10             | 684.14              |
| A_68_P30642144 | chr16:30510918-30510962                           | NM_172614:39724    | Tmem44     | DOWNSTREAM             | 0.116                                           | 0.534                            | 2371.78             | 1267.35             | 0.062                            | 1918.45             | 119.23              |
| A_68_P30642392 | chr16:30550884-30550928                           | NM_172614:-242     | Tmem44     | PROMOTER               | 0.429                                           | 0.604                            | 2111.36             | 1275.91             | 0.259                            | 1651.61             | 428.19              |
| A_68_P32488665 | chrX:78316348-78316392                            | NM_138751:388      | Tmem47     | INSIDE                 | 0.083                                           | 2.290                            | 4701.99             | 10769.55            | 0.190                            | 1725.36             | 328.11              |
| A_68_P32488666 | chrX:78316434-78316478                            | NM_138751:474      | Tmem47     | INSIDE                 | 0.323                                           | 1.684                            | 2769.27             | 4664.43             | 0.545                            | 987.39              | 537.79              |
| A_68_P23367600 | chr4:141640361-141640405                          | NM_145402:-163     | Tmem51     | PROMOTER               | 0.374                                           | 0.680                            | 2337.67             | 1589.41             | 0.254                            | 1770.14             | 449.70              |
| A_68_P23367601 | chr4:141640480-141640524                          | NM_145402:-283     | Tmem51     | PROMOTER               | 0.203                                           | 0.504                            | 1862.95             | 939.53              | 0.102                            | 1420.14             | 145.43              |
| A_68_P23233186 | chr4:116924691-116924735                          | NM_026837:119      | Tmem53     | INSIDE                 | 0.555                                           | 0.523                            | 1081.98             | 565.55              | 0.290                            | 914.03              | 265.04              |
| A_68_P23189068 | chr4:106851270-106851320                          | NM_029565:60       | Tmem59     | INSIDE                 | 0.163                                           | 0.533                            | 2035.46             | 1084.33             | 0.087                            | 1406.85             | 122.20              |
| A_68_P23189069 | chr4:106851457-106851501                          | NM_029565:244      | Tmem59     | INSIDE                 | 0.194                                           | 0.601                            | 2464.22             | 1481.85             | 0.117                            | 1760.27             | 205.58              |
| A_68_P21578169 | chr2:120802714-120802767                          | NM_175285:-57      | Tmem62     | DIVERGENT_PROMOTER     | 0.220                                           | 0.468                            | 1291.18             | 604.77              | 0.103                            | 1148.64             | 118.44              |

| ProbeName      | Target position of probe on CpG island microarray | TargetID           | GeneSymbol | CpG island Description | Ratio of relative methylation (TiO2-NP/Vehicle) | Sham group                       |                     |                     | TiO <sub>2</sub> -H group        |                     |                     |
|----------------|---------------------------------------------------|--------------------|------------|------------------------|-------------------------------------------------|----------------------------------|---------------------|---------------------|----------------------------------|---------------------|---------------------|
|                |                                                   |                    |            |                        |                                                 | Relative methylation (Cy-5/Cy-3) | Cy-3 signal (Input) | Cy-5 signal (MeDIP) | Relative methylation (Cy-5/Cy-3) | Cy-3 signal (Input) | Cy-5 signal (MeDIP) |
| A_68_P20878652 | chr1:182872565-182872613                          | NM_144794:-60      | Tmem63a    | PROMOTER               | 0.196                                           | 0.478                            | 1818.60             | 870.04              | 0.094                            | 1294.30             | 121.41              |
| A_68_P20878657 | chr1:182873054-182873098                          | NM_144794:428      | Tmem63a    | INSIDE                 | 0.481                                           | 0.689                            | 1123.22             | 773.44              | 0.331                            | 846.78              | 280.24              |
| A_68_P31202520 | chr17:45822206-45822252                           | NM_198167:939      | Tmem63b    | INSIDE                 | 0.196                                           | 0.619                            | 1416.25             | 876.64              | 0.121                            | 994.70              | 120.65              |
| A_68_P31202521 | chr17:45822303-45822347                           | NM_198167:843      | Tmem63b    | INSIDE                 | 0.107                                           | 0.597                            | 3648.58             | 2178.39             | 0.064                            | 2543.60             | 161.86              |
| A_68_P22749335 | chr4:15193708-15193752                            | NM_181401:764      | Tmem64     | INSIDE                 | 0.448                                           | 0.676                            | 1452.89             | 982.25              | 0.303                            | 1103.47             | 334.06              |
| A_68_P22733170 | chr4:12015068-12015112                            | NM_177861:14       | Tmem67     | INSIDE                 | 0.372                                           | 0.333                            | 1848.60             | 616.16              | 0.124                            | 1452.29             | 180.16              |
| A_68_P22693141 | chr4:3501940-3501984                              | NM_028097:-47      | Tmem68     | DIVERGENT_PROMOTER     | 0.611                                           | 0.637                            | 1267.27             | 807.37              | 0.390                            | 883.29              | 344.10              |
| A_68_P31108361 | chr17:26250094-26250138                           | NM_021793:-144     | Tmem8      | PROMOTER               | 0.172                                           | 0.673                            | 1159.93             | 780.64              | 0.115                            | 1061.02             | 122.53              |
| A_68_P25588179 | chr7:148514181-148514225                          | NR_024509:174      | Tmem80     | INSIDE                 | 0.202                                           | 0.369                            | 1949.27             | 719.31              | 0.075                            | 1554.11             | 115.81              |
| A_68_P21621499 | chr2:128643821-128643865                          | NM_028248:-196     | Tmem87b    | PROMOTER               | 0.516                                           | 0.683                            | 1950.87             | 1332.09             | 0.352                            | 1528.32             | 538.48              |
| A_68_P23440601 | chr4:155158362-155158406                          | NM_001033394:1599  | Tmem88b    | INSIDE                 | 0.279                                           | 0.443                            | 1265.33             | 560.57              | 0.124                            | 941.84              | 116.58              |
| A_68_P21736743 | chr2:149656066-149656110                          | NM_001085521:-430  | Tmem90b    | PROMOTER               | 0.612                                           | 0.634                            | 1383.81             | 877.21              | 0.388                            | 1006.57             | 390.19              |
| A_68_P21736744 | chr2:149656175-149656219                          | NM_001085521:-322  | Tmem90b    | PROMOTER               | 0.549                                           | 0.414                            | 1518.06             | 628.69              | 0.227                            | 1125.00             | 255.93              |
| A_68_P21736750 | chr2:149656913-149656958                          | NM_001085521:417   | Tmem90b    | INSIDE                 | 0.344                                           | 0.547                            | 1978.60             | 1081.48             | 0.188                            | 1688.29             | 317.19              |
| A_68_P27915635 | chr17:72990099-72990143                           | NM_001168470:390   | Tmem93     | INSIDE                 | 0.255                                           | 0.511                            | 1762.61             | 901.27              | 0.131                            | 1335.15             | 174.41              |
| A_68_P27944034 | chr11:78364333-78364383                           | NM_133706:-121     | Tmem97     | PROMOTER               | 0.184                                           | 0.628                            | 1454.68             | 913.75              | 0.115                            | 1053.69             | 121.58              |
| A_68_P24671557 | chr6:97129251-97129295                            | NM_001081111:-154  | Tmf1       | PROMOTER               | 0.341                                           | 0.658                            | 1851.91             | 1218.68             | 0.224                            | 1396.22             | 313.41              |
| A_68_P26644959 | chr9:75458604-75458648                            | NM_016711:506      | Tmod2      | INSIDE                 | 0.398                                           | 0.426                            | 2977.71             | 1268.02             | 0.170                            | 2449.97             | 415.69              |
| A_68_P26644654 | chr9:75406902-75406946                            | NM_016963:540      | Tmod3      | INSIDE                 | 0.618                                           | 0.550                            | 1637.02             | 900.32              | 0.340                            | 1383.47             | 469.90              |
| A_68_P27340413 | chr10:90634459-90634503                           | NM_001080129:-153  | Tmpo       | PROMOTER               | 0.637                                           | 0.532                            | 1631.07             | 868.20              | 0.339                            | 1314.71             | 445.66              |
| A_68_P30999921 | chr16:97832578-97832622                           | NM_015775:202      | Tmprss2    | INSIDE                 | 0.325                                           | 0.387                            | 1770.06             | 685.77              | 0.126                            | 1448.29             | 182.21              |
| A_68_P27392328 | chr10:99950341-99950385                           | NM_001110013:-381  | Tmtc3      | DIVERGENT_PROMOTER     | 0.366                                           | 0.500                            | 3863.71             | 1931.11             | 0.183                            | 2898.74             | 530.85              |
| A_68_P28078648 | chr11:102145969-102146013                         | NM_028076:-284     | Tmub2      | PROMOTER               | 0.105                                           | 0.621                            | 5025.74             | 3119.72             | 0.065                            | 3714.55             | 241.90              |
| A_68_P28078649 | chr11:102146096-102146140                         | NM_028076:-156     | Tmub2      | PROMOTER               | 0.506                                           | 0.657                            | 1328.67             | 872.90              | 0.332                            | 1108.92             | 368.39              |
| A_68_P28078652 | chr11:102146344-102146398                         | NM_028076:96       | Tmub2      | INSIDE                 | 0.142                                           | 2.534                            | 2094.28             | 5307.20             | 0.360                            | 1324.01             | 476.80              |
| A_68_P28520552 | chr12:71554055-71554099                           | NM_028339:-64      | Tmx1       | PROMOTER               | 0.232                                           | 0.645                            | 936.06              | 603.94              | 0.150                            | 787.49              | 117.81              |
| A_68_P28520554 | chr12:71554239-71554283                           | NM_028339:120      | Tmx1       | INSIDE                 | 0.241                                           | 0.426                            | 1369.19             | 583.75              | 0.103                            | 1131.56             | 116.17              |
| A_68_P21652098 | chr2:134469794-134469838                          | NM_029148:41       | Tmx4       | INSIDE                 | 0.653                                           | 0.491                            | 1576.93             | 775.03              | 0.321                            | 1270.80             | 407.65              |
| A_68_P21652099 | chr2:134469945-134469989                          | NM_029148:-109     | Tmx4       | PROMOTER               | 0.184                                           | 0.575                            | 1436.16             | 825.16              | 0.106                            | 1144.01             | 121.00              |
| A_68_P27943940 | chr11:78349786-78349836                           | NM_001159392:-48   | Tnfaip1    | DIVERGENT_PROMOTER     | 0.269                                           | 0.604                            | 1091.68             | 659.27              | 0.162                            | 739.47              | 120.15              |
| A_68_P28744113 | chr12:112680513-112680557                         | NM_009396:-337     | Tnfaip2    | PROMOTER               | 0.154                                           | 0.680                            | 2124.48             | 1444.75             | 0.105                            | 1578.48             | 165.41              |
| A_68_P28744144 | chr12:112683687-112683731                         | NM_009396:2837     | Tnfaip2    | INSIDE                 | 0.315                                           | 0.641                            | 1159.38             | 742.68              | 0.202                            | 841.52              | 169.59              |
| A_68_P28744145 | chr12:112683846-112683890                         | NM_009396:2997     | Tnfaip2    | INSIDE                 | 0.371                                           | 0.520                            | 2026.59             | 1053.27             | 0.193                            | 1632.63             | 314.96              |
| A_68_P26978748 | chr10:18734800-18734844                           | NM_001166402:-3053 | Tnfaip3    | PROMOTER               | 0.538                                           | 0.417                            | 3438.18             | 1432.36             | 0.224                            | 2664.50             | 596.84              |
| A_68_P22342446 | chr3:94944251-94944296                            | NM_027206:2009     | Tnfaip8l2  | INSIDE                 | 0.462                                           | 3.566                            | 1855.17             | 6614.92             | 1.649                            | 1356.31             | 2235.99             |
| A_68_P22342447 | chr3:94944410-94944458                            | NM_027206:1848     | Tnfaip8l2  | INSIDE                 | 0.626                                           | 5.217                            | 2252.92             | 11753.35            | 3.264                            | 1502.71             | 4904.67             |
| A_68_P31092979 | chr17:23813505-23813549                           | NM_001161746:890   | Tnfrsf12a  | INSIDE                 | 0.245                                           | 0.733                            | 2153.76             | 1578.53             | 0.180                            | 1562.27             | 281.07              |
| A_68_P31092987 | chr17:23814347-23814391                           | NM_001161746:48    | Tnfrsf12a  | INSIDE                 | 0.439                                           | 0.568                            | 2157.24             | 1224.67             | 0.249                            | 1778.86             | 443.64              |
| A_68_P30382206 | chr15:82054633-82054677                           | NM_028075:112      | Tnfrsf13c  | INSIDE                 | 0.308                                           | 0.409                            | 1535.29             | 628.63              | 0.126                            | 1098.26             | 138.39              |
| A_68_P29647965 | chr14:61656646-61656690                           | NM_001164155:156   | Tnfrsf19   | INSIDE                 | 0.296                                           | 0.424                            | 1805.28             | 765.52              | 0.125                            | 1451.09             | 182.03              |
| A_68_P23382179 | chr4:144836289-144836333                          | NM_011610:463      | Tnfrsf1b   | INSIDE                 | 0.379                                           | 0.710                            | 2172.27             | 1541.23             | 0.269                            | 1510.46             | 406.10              |
| A_68_P31187140 | chr17:43154341-43154385                           | NM_178589:859      | Tnfrsf21   | INSIDE                 | 0.223                                           | 1.504                            | 3996.57             | 6010.79             | 0.335                            | 2823.24             | 946.31              |
| A_68_P22015871 | chr3:28161528-28161576                            | NM_001163009:-583  | Tnik       | PROMOTER               | 0.208                                           | 0.685                            | 1661.47             | 1138.35             | 0.142                            | 1103.60             | 157.16              |
| A_68_P22015879 | chr3:28162505-28162549                            | NM_001163009:391   | Tnik       | INSIDE                 | 0.360                                           | 0.558                            | 1455.69             | 812.90              | 0.201                            | 1111.03             | 223.27              |

| ProbeName      | Target position of probe on CpG island microarray | TargetID           | GeneSymbol | CpG island Description | Ratio of relative methylation (TiO2-NP/Vehicle) | Sham group                       |                     |                     | TiO <sub>2</sub> -H group        |                     |                     |
|----------------|---------------------------------------------------|--------------------|------------|------------------------|-------------------------------------------------|----------------------------------|---------------------|---------------------|----------------------------------|---------------------|---------------------|
|                |                                                   |                    |            |                        |                                                 | Relative methylation (Cy-5/Cy-3) | Cy-3 signal (Input) | Cy-5 signal (MeDIP) | Relative methylation (Cy-5/Cy-3) | Cy-3 signal (Input) | Cy-5 signal (MeDIP) |
| A_68_P23594730 | chr5:34856051-34856097                            | NM_139064:554      | Tnlp2      | INSIDE                 | 0.325                                           | 1.737                            | 1122.27             | 1949.46             | 0.565                            | 867.02              | 490.08              |
| A_68_P23594734 | chr5:34856584-34856628                            | NM_139064:22       | Tnlp2      | INSIDE                 | 0.530                                           | 0.519                            | 2578.87             | 1339.05             | 0.275                            | 2021.01             | 555.90              |
| A_68_P25777210 | chr8:36028138-36028182                            | NM_175091:584      | Tnks       | INSIDE                 | 0.236                                           | 0.523                            | 3263.36             | 1707.65             | 0.123                            | 2635.24             | 324.98              |
| A_68_P21396039 | chr2:84888658-84888702                            | NM_001081260:-1936 | Tnks1bp1   | PROMOTER               | 0.136                                           | 0.598                            | 3705.39             | 2214.45             | 0.082                            | 2725.49             | 222.19              |
| A_68_P21396040 | chr2:84888732-84888776                            | NM_001081260:-1862 | Tnks1bp1   | PROMOTER               | 0.320                                           | 0.685                            | 1542.69             | 1056.32             | 0.219                            | 1141.47             | 250.15              |
| A_68_P29260160 | chr13:99660969-99661013                           | NM_001048267:7     | Tnpo1      | INSIDE                 | 0.379                                           | 0.400                            | 1452.88             | 581.14              | 0.152                            | 1244.49             | 188.74              |
| A_68_P26023333 | chr8:87561242-87561290                            | NM_001122843:200   | Tnpo2      | INSIDE                 | 0.334                                           | 5.335                            | 1922.75             | 10257.39            | 1.781                            | 1145.10             | 2039.63             |
| A_68_P26023334 | chr8:87561401-87561445                            | NM_001122843:356   | Tnpo2      | INSIDE                 | 0.118                                           | 2.630                            | 15621.84            | 41083.68            | 0.311                            | 10145.26            | 3155.63             |
| A_68_P26023335 | chr8:87561478-87561522                            | NM_001122843:434   | Tnpo2      | INSIDE                 | 0.218                                           | 2.482                            | 6585.83             | 16344.37            | 0.540                            | 4234.41             | 2286.58             |
| A_68_P26023338 | chr8:87561856-87561900                            | NM_001122843:812   | Tnpo2      | INSIDE                 | 0.308                                           | 0.563                            | 1020.00             | 574.25              | 0.173                            | 736.69              | 127.64              |
| A_68_P26023339 | chr8:87561977-87562021                            | NM_001122843:932   | Tnpo2      | INSIDE                 | 0.127                                           | 0.513                            | 2537.94             | 1303.00             | 0.065                            | 1860.45             | 121.30              |
| A_68_P24327616 | chr6:29559131-29559176                            | NM_177296:454      | Tnpo3      | INSIDE                 | 0.087                                           | 0.652                            | 2501.68             | 1630.35             | 0.056                            | 2038.32             | 115.08              |
| A_68_P24327617 | chr6:29559260-29559304                            | NM_177296:325      | Tnpo3      | INSIDE                 | 0.137                                           | 0.735                            | 6423.12             | 4720.37             | 0.101                            | 4616.03             | 464.23              |
| A_68_P24327619 | chr6:29559522-29559566                            | NM_177296:63       | Tnpo3      | INSIDE                 | 0.474                                           | 0.545                            | 1375.40             | 749.19              | 0.258                            | 1119.01             | 289.03              |
| A_68_P24153541 | chr5:143578202-143578246                          | NM_001122730:842   | Tnrc18     | INSIDE                 | 0.276                                           | 0.445                            | 1329.77             | 591.54              | 0.123                            | 985.09              | 121.07              |
| A_68_P24153542 | chr5:143578302-143578350                          | NM_001122730:740   | Tnrc18     | INSIDE                 | 0.135                                           | 0.577                            | 2329.17             | 1344.42             | 0.078                            | 1499.81             | 116.77              |
| A_68_P24153543 | chr5:143578378-143578435                          | NM_001122730:660   | Tnrc18     | INSIDE                 | 0.189                                           | 0.700                            | 1269.33             | 888.91              | 0.132                            | 874.65              | 115.63              |
| A_68_P24153575 | chr5:143582152-143582196                          | NM_001122730:-3108 | Tnrc18     | PROMOTER               | 0.603                                           | 0.599                            | 1074.49             | 643.17              | 0.361                            | 846.95              | 305.86              |
| A_68_P30374035 | chr15:80541596-80541640                           | NM_144812:-124     | Tnrc6b     | PROMOTER               | 0.114                                           | 0.595                            | 2247.59             | 1336.71             | 0.068                            | 1723.90             | 117.03              |
| A_68_P30374040 | chr15:80542264-80542308                           | NM_144812:544      | Tnrc6b     | INSIDE                 | 0.495                                           | 0.647                            | 2328.40             | 1505.81             | 0.320                            | 1688.43             | 540.25              |
| A_68_P30374041 | chr15:80542355-80542399                           | NM_144812:634      | Tnrc6b     | INSIDE                 | 0.216                                           | 0.675                            | 2383.47             | 1608.99             | 0.146                            | 1698.77             | 247.47              |
| A_68_P30374042 | chr15:80542447-80542491                           | NM_144812:726      | Tnrc6b     | INSIDE                 | 0.291                                           | 0.565                            | 2485.99             | 1404.12             | 0.164                            | 1757.12             | 288.84              |
| A_68_P28166392 | chr11:117517198-117517249                         | NM_198022:1621     | Tnrc6c     | INSIDE                 | 0.135                                           | 0.677                            | 1899.77             | 1286.31             | 0.091                            | 1297.93             | 118.68              |
| A_68_P20346581 | chr1:74115086-74115133                            | NM_027884:55912    | Tns1       | INSIDE                 | 0.594                                           | 0.542                            | 1191.98             | 645.89              | 0.322                            | 865.66              | 278.39              |
| A_68_P20346582 | chr1:74115236-74115286                            | NM_027884:55761    | Tns1       | INSIDE                 | 0.585                                           | 0.486                            | 1637.65             | 796.65              | 0.284                            | 1178.01             | 335.06              |
| A_68_P20346773 | chr1:74144944-74144988                            | NM_027884:26055    | Tns1       | INSIDE                 | 0.445                                           | 0.456                            | 1362.03             | 621.17              | 0.203                            | 1054.48             | 213.78              |
| A_68_P28031414 | chr11:94071733-94071777                           | NM_009427:-1013    | Tob1       | PROMOTER               | 0.304                                           | 0.584                            | 957.13              | 559.06              | 0.178                            | 830.53              | 147.57              |
| A_68_P28031420 | chr11:94072519-94072563                           | NM_009427:-227     | Tob1       | PROMOTER               | 0.112                                           | 0.690                            | 1945.63             | 1342.85             | 0.077                            | 1587.01             | 122.52              |
| A_68_P30380064 | chr15:81688492-81688536                           | NM_020507:242      | Tob2       | INSIDE                 | 0.141                                           | 0.691                            | 1994.19             | 1377.13             | 0.097                            | 1532.96             | 149.05              |
| A_68_P30380073 | chr15:81689400-81689446                           | NM_020507:-666     | Tob2       | PROMOTER               | 0.289                                           | 0.544                            | 1004.28             | 546.65              | 0.157                            | 757.58              | 119.12              |
| A_68_P30380080 | chr15:81690283-81690327                           | NM_020507:-1548    | Tob2       | PROMOTER               | 0.473                                           | 0.481                            | 2092.30             | 1006.96             | 0.228                            | 1728.62             | 393.52              |
| A_68_P30380081 | chr15:81690360-81690404                           | NM_020507:-1626    | Tob2       | PROMOTER               | 0.303                                           | 0.448                            | 1756.42             | 786.79              | 0.136                            | 1382.89             | 187.56              |
| A_68_P23231032 | chr4:116480068-116480112                          | NM_026654:74       | Toe1       | INSIDE                 | 0.396                                           | 0.637                            | 1622.39             | 1033.81             | 0.252                            | 1277.20             | 322.39              |
| A_68_P25591626 | chr7:149088429-149088473                          | NM_023764:-139     | Tollip     | PROMOTER               | 0.655                                           | 0.646                            | 1001.20             | 646.50              | 0.423                            | 830.74              | 351.32              |
| A_68_P27842502 | chr11:60166254-60166298                           | NM_001039092:131   | Tom112     | INSIDE                 | 0.286                                           | 0.524                            | 2049.56             | 1073.20             | 0.150                            | 1540.13             | 230.37              |
| A_68_P27842504 | chr11:60166452-60166496                           | NM_001039092:-67   | Tom112     | DIVERGENT_PROMOTER     | 0.465                                           | 0.454                            | 1311.65             | 595.13              | 0.211                            | 1114.16             | 234.83              |
| A_68_P27842505 | chr11:60166539-60166583                           | NM_001039092:-153  | Tom112     | DIVERGENT_PROMOTER     | 0.404                                           | 0.361                            | 1587.91             | 572.60              | 0.146                            | 1187.68             | 172.87              |
| A_68_P24994882 | chr7:20300214-20300266                            | NM_001109748:538   | Tommm40    | INSIDE                 | 0.257                                           | 0.597                            | 1233.87             | 737.16              | 0.154                            | 810.04              | 124.51              |
| A_68_P24994886 | chr7:20300585-20300629                            | NM_001109748:172   | Tommm40    | INSIDE                 | 0.125                                           | 0.549                            | 2347.38             | 1289.31             | 0.069                            | 1698.43             | 116.58              |
| A_68_P24994888 | chr7:20300800-20300844                            | NM_001109748:-44   | Tommm40    | PROMOTER               | 0.309                                           | 0.703                            | 2686.35             | 1888.44             | 0.217                            | 1825.38             | 396.24              |
| A_68_P24994892 | chr7:20301207-20301251                            | NM_001109748:-450  | Tommm40    | PROMOTER               | 0.452                                           | 0.561                            | 1535.10             | 861.57              | 0.254                            | 1205.67             | 305.93              |
| A_68_P22881129 | chr4:45120647-45120691                            | NM_001099675:317   | Tommm5     | INSIDE                 | 0.580                                           | 0.725                            | 3108.26             | 2254.27             | 0.421                            | 2339.66             | 984.34              |
| A_68_P31213633 | chr17:47825295-47825344                           | NM_001164729:16    | Tommm6     | INSIDE                 | 0.312                                           | 0.539                            | 1512.89             | 815.78              | 0.168                            | 1072.92             | 180.78              |
| A_68_P31213635 | chr17:47825554-47825598                           | NM_001164729:-241  | Tommm6     | DIVERGENT_PROMOTER     | 0.251                                           | 0.696                            | 1225.87             | 852.85              | 0.175                            | 968.48              | 169.39              |



| ProbeName      | Target position of probe on CpG island microarray | TargetID           | GeneSymbol | CpG island Description | Ratio of relative methylation (TiO2-NP/Vehicle) | Sham group                       |                     |                     | TiO <sub>2</sub> -H group        |                     |                     |
|----------------|---------------------------------------------------|--------------------|------------|------------------------|-------------------------------------------------|----------------------------------|---------------------|---------------------|----------------------------------|---------------------|---------------------|
|                |                                                   |                    |            |                        |                                                 | Relative methylation (Cy-5/Cy-3) | Cy-3 signal (Input) | Cy-5 signal (MeDIP) | Relative methylation (Cy-5/Cy-3) | Cy-3 signal (Input) | Cy-5 signal (MeDIP) |
| A_68_P31213636 | chr17:47825672-47825716                           | NM_001164729:-359  | Tomm6      | DIVERGENT_PROMOTER     | 0.437                                           | 0.614                            | 1449.34             | 889.49              | 0.268                            | 1090.21             | 292.12              |
| A_68_P30349611 | chr15:76470372-76470416                           | NM_183091:-35      | Tomsl      | PROMOTER               | 0.412                                           | 1.668                            | 9193.56             | 15333.36            | 0.687                            | 5983.93             | 4113.26             |
| A_68_P21796145 | chr2:160471648-160471692                          | NM_009408:38       | Top1       | INSIDE                 | 0.180                                           | 0.712                            | 1596.72             | 1136.89             | 0.128                            | 1198.05             | 153.55              |
| A_68_P21796146 | chr2:160471717-160471761                          | NM_009408:106      | Top1       | INSIDE                 | 0.120                                           | 0.735                            | 2672.00             | 1965.25             | 0.088                            | 1902.34             | 167.62              |
| A_68_P29428727 | chr14:17197508-17197553                           | NM_009409:-189     | Top2b      | PROMOTER               | 0.221                                           | 0.554                            | 1431.70             | 792.82              | 0.123                            | 1177.86             | 144.42              |
| A_68_P29428735 | chr14:17198392-17198436                           | NM_009409:695      | Top2b      | INSIDE                 | 0.370                                           | 0.674                            | 1504.02             | 1014.20             | 0.249                            | 1100.21             | 274.36              |
| A_68_P30570744 | chr16:16870950-16870994                           | NM_011624:-11      | Top3b      | DIVERGENT_PROMOTER     | 0.288                                           | 0.325                            | 1641.88             | 533.84              | 0.094                            | 1394.13             | 130.41              |
| A_68_P26785090 | chr9:103207295-103207339                          | NM_176979:-340     | Topbp1     | PROMOTER               | 0.147                                           | 0.388                            | 2743.91             | 1064.70             | 0.057                            | 2150.14             | 122.56              |
| A_68_P22856581 | chr4:40216815-40216859                            | NM_134097:38       | Topors     | INSIDE                 | 0.340                                           | 0.655                            | 831.30              | 544.49              | 0.223                            | 700.62              | 156.13              |
| A_68_P21106251 | chr2:30822965-30823009                            | NM_144884:452      | Tor1a      | INSIDE                 | 0.489                                           | 0.476                            | 3023.40             | 1439.48             | 0.233                            | 2264.47             | 527.50              |
| A_68_P21106145 | chr2:30808853-30808897                            | NM_133673:354      | Tor1b      | INSIDE                 | 0.316                                           | 0.420                            | 1700.27             | 714.36              | 0.133                            | 1334.02             | 177.11              |
| A_68_P21117288 | chr2:32612911-32612955                            | NM_152800:142      | Tor2a      | INSIDE                 | 0.599                                           | 0.668                            | 1061.59             | 709.04              | 0.400                            | 876.03              | 350.28              |
| A_68_P20744278 | chr1:158604428-158604472                          | NM_023141:20       | Tor3a      | INSIDE                 | 0.567                                           | 0.435                            | 1221.33             | 531.24              | 0.247                            | 1085.85             | 267.91              |
| A_68_P22708706 | chr4:6918269-6918313                              | NM_145711:-420     | Tox        | PROMOTER               | 0.094                                           | 0.752                            | 5768.87             | 4337.10             | 0.071                            | 3833.26             | 270.81              |
| A_68_P26052838 | chr8:92871596-92871645                            | NM_172913:531      | Tox3       | INSIDE                 | 0.505                                           | 0.698                            | 2166.30             | 1512.29             | 0.353                            | 1706.60             | 601.80              |
| A_68_P26696144 | chr9:85736977-85737021                            | NM_001164792:540   | Tpbp       | INSIDE                 | 0.373                                           | 0.555                            | 3333.29             | 1850.00             | 0.207                            | 2445.55             | 505.91              |
| A_68_P26696146 | chr9:85737161-85737205                            | NM_001164792:724   | Tpbp       | INSIDE                 | 0.234                                           | 0.718                            | 8510.89             | 6108.73             | 0.168                            | 5688.51             | 954.17              |
| A_68_P21935172 | chr3:9004150-9004194                              | NM_001025263:343   | Tpd52      | INSIDE                 | 0.503                                           | 0.587                            | 3003.09             | 1762.66             | 0.295                            | 2286.45             | 674.61              |
| A_68_P27044450 | chr10:31165279-31165323                           | NM_009413:427      | Tpd52l1    | INSIDE                 | 0.444                                           | 1.523                            | 2312.79             | 3521.38             | 0.675                            | 1632.74             | 1102.72             |
| A_68_P27044452 | chr10:31165585-31165629                           | NM_009413:121      | Tpd52l1    | INSIDE                 | 0.264                                           | 0.445                            | 1375.58             | 611.90              | 0.118                            | 1068.33             | 125.54              |
| A_68_P26596713 | chr9:66891367-66891411                            | NM_001164252:290   | Tpm1       | INSIDE                 | 0.411                                           | 0.633                            | 1916.73             | 1214.25             | 0.260                            | 1718.65             | 447.69              |
| A_68_P26596750 | chr9:66896100-66896144                            | NM_001164252:-4444 | Tpm1       | PROMOTER               | 0.597                                           | 0.443                            | 1696.14             | 752.00              | 0.264                            | 1218.54             | 322.29              |
| A_68_P26596751 | chr9:66896180-66896228                            | NM_001164252:-4526 | Tpm1       | PROMOTER               | 0.573                                           | 0.467                            | 1734.19             | 810.51              | 0.268                            | 1328.51             | 355.62              |
| A_68_P22872184 | chr4:43536297-43536341                            | NM_009416:-58      | Tpm2       | PROMOTER               | 0.591                                           | 0.647                            | 1978.44             | 1279.19             | 0.382                            | 1525.80             | 582.66              |
| A_68_P22872187 | chr4:43536672-43536716                            | NM_009416:-434     | Tpm2       | PROMOTER               | 0.617                                           | 0.497                            | 1160.65             | 576.55              | 0.306                            | 917.73              | 281.16              |
| A_68_P22323355 | chr3:89883388-89883433                            | NM_022314:6795     | Tpm3       | INSIDE                 | 0.491                                           | 0.404                            | 1330.90             | 537.16              | 0.198                            | 1163.31             | 230.75              |
| A_68_P22323363 | chr3:89884285-89884329                            | NM_022314:7691     | Tpm3       | INSIDE                 | 0.398                                           | 0.365                            | 1427.82             | 521.52              | 0.145                            | 1038.00             | 150.77              |
| A_68_P25959791 | chr8:74658901-74658954                            | NM_001001491:-263  | Tpm4       | PROMOTER               | 0.167                                           | 1.576                            | 620.44              | 977.71              | 0.263                            | 457.97              | 120.45              |
| A_68_P25959798 | chr8:74659599-74659643                            | NM_001001491:430   | Tpm4       | INSIDE                 | 0.204                                           | 0.518                            | 3464.10             | 1794.52             | 0.105                            | 2558.82             | 269.81              |
| A_68_P20191545 | chr1:43990635-43990679                            | NM_009418:-195     | Tpp2       | PROMOTER               | 0.386                                           | 0.587                            | 1071.02             | 628.56              | 0.226                            | 849.56              | 192.28              |
| A_68_P24624900 | chr6:88852416-88852460                            | NM_011906:194      | Tpra1      | INSIDE                 | 0.619                                           | 0.412                            | 1630.70             | 672.01              | 0.255                            | 1328.12             | 338.55              |
| A_68_P23429475 | chr4:153535140-153535184                          | NM_026388:-369     | Tprgl      | DIVERGENT_PROMOTER     | 0.222                                           | 0.693                            | 3013.74             | 2088.44             | 0.154                            | 2198.31             | 338.44              |
| A_68_P21070952 | chr2:25118487-25118531                            | NM_175286:391      | Tprm       | INSIDE                 | 0.561                                           | 0.472                            | 2594.30             | 1223.22             | 0.264                            | 1909.58             | 505.07              |
| A_68_P24092036 | chr5:130555652-130555696                          | NM_001130476:319   | Tpst1      | INSIDE                 | 0.290                                           | 0.699                            | 1632.32             | 1140.96             | 0.203                            | 1334.75             | 270.58              |
| A_68_P23991126 | chr5:112706061-112706105                          | NM_009419:356      | Tpst2      | INSIDE                 | 0.359                                           | 0.547                            | 2099.86             | 1148.95             | 0.197                            | 1642.33             | 322.96              |
| A_68_P29730260 | chr14:76244587-76244631                           | NM_009429:-454     | Tpt1       | PROMOTER               | 0.556                                           | 0.620                            | 1882.04             | 1166.11             | 0.345                            | 1509.21             | 519.98              |
| A_68_P29730261 | chr14:76244654-76244698                           | NM_009429:-386     | Tpt1       | PROMOTER               | 0.339                                           | 0.504                            | 2082.32             | 1050.12             | 0.171                            | 1574.00             | 269.35              |
| A_68_P24431872 | chr6:49213460-49213504                            | NM_198102:569      | Tra2a      | INSIDE                 | 0.611                                           | 0.663                            | 1617.45             | 1072.19             | 0.405                            | 1375.13             | 556.98              |
| A_68_P24431873 | chr6:49213588-49213632                            | NM_198102:441      | Tra2a      | INSIDE                 | 0.215                                           | 0.626                            | 2953.52             | 1847.72             | 0.134                            | 2091.01             | 280.83              |
| A_68_P24431874 | chr6:49213690-49213734                            | NM_198102:339      | Tra2a      | INSIDE                 | 0.481                                           | 0.437                            | 2489.43             | 1086.95             | 0.210                            | 1956.38             | 410.72              |
| A_68_P24431878 | chr6:49214131-49214175                            | NM_198102:-101     | Tra2a      | PROMOTER               | 0.660                                           | 0.547                            | 1378.24             | 753.33              | 0.361                            | 1225.96             | 442.04              |
| A_68_P30596854 | chr16:22265994-22266038                           | NM_009186:-14      | Tra2b      | PROMOTER               | 0.551                                           | 0.416                            | 2931.55             | 1220.49             | 0.230                            | 2189.19             | 502.54              |
| A_68_P30596855 | chr16:22266102-22266148                           | NM_009186:-122     | Tra2b      | PROMOTER               | 0.497                                           | 0.469                            | 1763.69             | 826.70              | 0.233                            | 1298.29             | 302.60              |
| A_68_P26132557 | chr8:107783610-107783659                          | NM_001033161:4860  | Tradd      | INSIDE                 | 0.309                                           | 0.384                            | 1335.67             | 513.41              | 0.119                            | 1041.01             | 123.64              |

| ProbeName      | Target position of probe on CpG island microarray | TargetID          | GeneSymbol | CpG island Description | Ratio of relative methylation (TiO2-NP/Vehicle) | Sham group                       |                     |                     | TiO <sub>2</sub> -H group        |                     |                     |
|----------------|---------------------------------------------------|-------------------|------------|------------------------|-------------------------------------------------|----------------------------------|---------------------|---------------------|----------------------------------|---------------------|---------------------|
|                |                                                   |                   |            |                        |                                                 | Relative methylation (Cy-5/Cy-3) | Cy-3 signal (Input) | Cy-5 signal (MeDIP) | Relative methylation (Cy-5/Cy-3) | Cy-3 signal (Input) | Cy-5 signal (MeDIP) |
| A_68_P21072876 | chr2:25402210-25402254                            | NM_009422:182     | Traf2      | INSIDE                 | 0.357                                           | 0.682                            | 2963.88             | 2022.28             | 0.244                            | 2354.67             | 574.25              |
| A_68_P27941695 | chr11:77979180-77979227                           | NM_009423:-151    | Traf4      | PROMOTER               | 0.282                                           | 0.538                            | 1100.62             | 591.94              | 0.152                            | 926.94              | 140.73              |
| A_68_P31097896 | chr17:24664666-24664710                           | NM_001172113:195  | Traf7      | INSIDE                 | 0.557                                           | 0.341                            | 5166.04             | 1761.38             | 0.190                            | 3885.73             | 738.42              |
| A_68_P24044263 | chr5:121835304-121835348                          | NM_001163470:298  | Trafd1     | INSIDE                 | 0.558                                           | 0.489                            | 1698.87             | 830.23              | 0.273                            | 1368.54             | 373.35              |
| A_68_P26812057 | chr9:107853467-107853511                          | NM_011634:195     | Traip      | INSIDE                 | 0.284                                           | 0.576                            | 971.65              | 559.31              | 0.163                            | 761.10              | 124.36              |
| A_68_P20261290 | chr1:59030112-59030156                            | NM_172406:192     | Trak2      | INSIDE                 | 0.173                                           | 0.576                            | 1347.13             | 775.38              | 0.099                            | 1223.76             | 121.66              |
| A_68_P20261291 | chr1:59030219-59030263                            | NM_172406:86      | Trak2      | INSIDE                 | 0.545                                           | 0.467                            | 2678.36             | 1252.08             | 0.255                            | 2055.05             | 523.99              |
| A_68_P22492342 | chr3:124024204-124024248                          | NM_146140:272     | Tram111    | INSIDE                 | 0.183                                           | 0.634                            | 1498.47             | 949.44              | 0.116                            | 1189.22             | 138.15              |
| A_68_P20076127 | chr1:21068999-21069043                            | NM_133252:270     | Tram2      | INSIDE                 | 0.301                                           | 0.699                            | 3103.23             | 2169.79             | 0.210                            | 2237.15             | 470.26              |
| A_68_P20076128 | chr1:21069108-21069152                            | NM_133252:160     | Tram2      | INSIDE                 | 0.358                                           | 0.673                            | 900.90              | 606.18              | 0.241                            | 699.67              | 168.66              |
| A_68_P30508110 | chr16:4077547-4077591                             | NM_026508:242     | Trap1      | INSIDE                 | 0.226                                           | 0.516                            | 4083.99             | 2108.96             | 0.116                            | 3328.19             | 387.58              |
| A_68_P27273026 | chr10:77707095-77707139                           | NM_001081055:271  | Trappe10   | INSIDE                 | 0.203                                           | 0.411                            | 2015.47             | 827.41              | 0.083                            | 1647.53             | 137.20              |
| A_68_P27273027 | chr10:77707175-77707219                           | NM_001081055:191  | Trappe10   | INSIDE                 | 0.486                                           | 0.604                            | 988.87              | 596.80              | 0.293                            | 877.04              | 257.23              |
| A_68_P26467466 | chr9:44215609-44215655                            | NM_021789:-1      | Trappe4    | DIVERGENT_PROMOTER     | 0.269                                           | 0.448                            | 1284.89             | 576.13              | 0.121                            | 983.79              | 118.56              |
| A_68_P25615117 | chr8:3676454-3676498                              | NM_025701:0       | Trappe5    | INSIDE                 | 0.556                                           | 0.418                            | 1651.13             | 689.43              | 0.232                            | 1207.39             | 280.25              |
| A_68_P24993673 | chr7:20094233-20094277                            | NM_025960:177     | Trappe6a   | INSIDE                 | 0.110                                           | 0.688                            | 2221.60             | 1528.73             | 0.076                            | 1595.84             | 121.13              |
| A_68_P24993674 | chr7:20094360-20094415                            | NM_025960:310     | Trappe6a   | INSIDE                 | 0.331                                           | 0.575                            | 908.18              | 522.04              | 0.190                            | 633.11              | 120.39              |
| A_68_P30255505 | chr15:59479171-59479215                           | NM_144549:-1016   | Trib1      | PROMOTER               | 0.444                                           | 0.602                            | 942.82              | 567.58              | 0.267                            | 726.19              | 193.97              |
| A_68_P30255508 | chr15:59479606-59479650                           | NM_144549:-580    | Trib1      | PROMOTER               | 0.206                                           | 0.566                            | 1128.83             | 638.86              | 0.117                            | 1002.69             | 117.03              |
| A_68_P30255521 | chr15:59480987-59481031                           | NM_144549:800     | Trib1      | INSIDE                 | 0.644                                           | 0.711                            | 2941.36             | 2089.94             | 0.458                            | 2130.32             | 975.09              |
| A_68_P30255522 | chr15:59481111-59481155                           | NM_144549:924     | Trib1      | INSIDE                 | 0.307                                           | 0.739                            | 3058.17             | 2261.46             | 0.227                            | 2131.78             | 483.22              |
| A_68_P28261127 | chr12:15821624-15821668                           | NM_144551:1945    | Trib2      | INSIDE                 | 0.472                                           | 0.419                            | 2338.01             | 980.55              | 0.198                            | 1791.67             | 354.29              |
| A_68_P28261128 | chr12:15821694-15821738                           | NM_144551:1875    | Trib2      | INSIDE                 | 0.553                                           | 0.685                            | 3081.72             | 2110.61             | 0.379                            | 2537.93             | 960.76              |
| A_68_P28261129 | chr12:15821863-15821907                           | NM_144551:1707    | Trib2      | INSIDE                 | 0.261                                           | 0.514                            | 2868.64             | 1474.94             | 0.134                            | 2134.33             | 286.42              |
| A_68_P24459339 | chr6:53768981-53769025                            | NM_025817:1817    | Tril       | INSIDE                 | 0.306                                           | 0.465                            | 1127.31             | 524.46              | 0.142                            | 852.50              | 121.18              |
| A_68_P24459340 | chr6:53769060-53769104                            | NM_025817:1737    | Tril       | INSIDE                 | 0.185                                           | 0.613                            | 4396.63             | 2697.18             | 0.114                            | 2944.14             | 334.33              |
| A_68_P24459344 | chr6:53769514-53769558                            | NM_025817:1283    | Tril       | INSIDE                 | 0.475                                           | 1.411                            | 4056.02             | 5722.18             | 0.670                            | 2907.24             | 1947.23             |
| A_68_P24459352 | chr6:53770524-53770568                            | NM_025817:273     | Tril       | INSIDE                 | 0.225                                           | 0.675                            | 1095.07             | 739.25              | 0.152                            | 870.73              | 132.26              |
| A_68_P24459354 | chr6:53770780-53770824                            | NM_025817:17      | Tril       | INSIDE                 | 0.465                                           | 0.507                            | 1818.07             | 922.10              | 0.236                            | 1314.72             | 310.32              |
| A_68_P27833860 | chr11:58791364-58791408                           | NM_053168:-231    | Trim11     | PROMOTER               | 0.208                                           | 0.587                            | 1611.99             | 946.59              | 0.122                            | 1170.48             | 142.80              |
| A_68_P24374361 | chr6:37820805-37820849                            | NM_145076:16      | Trim24     | INSIDE                 | 0.308                                           | 0.697                            | 3366.12             | 2345.10             | 0.215                            | 2760.08             | 592.80              |
| A_68_P24374366 | chr6:37821755-37821801                            | NM_145076:968     | Trim24     | INSIDE                 | 0.246                                           | 0.494                            | 1248.19             | 616.73              | 0.122                            | 990.00              | 120.32              |
| A_68_P28003255 | chr11:88860965-88861009                           | NM_009546:270     | Trim25     | INSIDE                 | 0.464                                           | 0.654                            | 1701.70             | 1112.18             | 0.304                            | 1229.69             | 373.28              |
| A_68_P28871637 | chr13:21292413-21292457                           | NM_009054:20607   | Trim27     | DOWNSTREAM             | 0.433                                           | 0.518                            | 1248.32             | 647.22              | 0.225                            | 964.05              | 216.53              |
| A_68_P28871638 | chr13:21292545-21292595                           | NM_009054:20743   | Trim27     | DOWNSTREAM             | 0.346                                           | 0.415                            | 1486.03             | 616.88              | 0.144                            | 1132.32             | 162.54              |
| A_68_P25393298 | chr7:112766252-112766301                          | NM_018880:15737   | Trim3      | INSIDE                 | 0.583                                           | 3.635                            | 900.14              | 3272.04             | 2.120                            | 687.53              | 1457.72             |
| A_68_P25393401 | chr7:112781612-112781656                          | NM_018880:379     | Trim3      | INSIDE                 | 0.229                                           | 2.580                            | 12493.00            | 32226.47            | 0.591                            | 7813.22             | 4616.60             |
| A_68_P25388365 | chr7:111650415-111650462                          | NM_001167828:5925 | Trim30d    | INSIDE                 | 0.170                                           | 0.630                            | 1362.31             | 857.84              | 0.107                            | 1107.63             | 118.37              |
| A_68_P22982497 | chr4:65265989-65266033                            | NM_001161782:-9   | Trim32     | PROMOTER               | 0.114                                           | 0.610                            | 2629.47             | 1605.00             | 0.070                            | 1876.15             | 130.92              |
| A_68_P22982499 | chr4:65266160-65266204                            | NM_001161782:163  | Trim32     | INSIDE                 | 0.205                                           | 2.166                            | 12466.27            | 26998.36            | 0.443                            | 8254.48             | 3659.90             |
| A_68_P22982500 | chr4:65266278-65266324                            | NM_001161782:281  | Trim32     | INSIDE                 | 0.372                                           | 4.813                            | 8083.80             | 38907.65            | 1.792                            | 5043.12             | 9035.68             |
| A_68_P22385237 | chr3:103084452-103084496                          | NM_001079830:1259 | Trim33     | INSIDE                 | 0.490                                           | 0.698                            | 2203.17             | 1538.33             | 0.342                            | 1451.29             | 496.79              |
| A_68_P31675570 | chr18:46358067-46358111                           | NM_001170855:384  | Trim36     | INSIDE                 | 0.501                                           | 0.620                            | 1180.61             | 732.54              | 0.311                            | 987.23              | 306.77              |
| A_68_P31675571 | chr18:46358139-46358185                           | NM_001170855:310  | Trim36     | INSIDE                 | 0.082                                           | 0.694                            | 2673.28             | 1855.88             | 0.057                            | 2181.95             | 123.51              |

| ProbeName      | Target position of probe on CpG island microarray | TargetID          | GeneSymbol | CpG island Description | Ratio of relative methylation (TiO2-NP/Vehicle) | Sham group                       |                     |                     | TiO <sub>2</sub> -H group        |                     |                     |
|----------------|---------------------------------------------------|-------------------|------------|------------------------|-------------------------------------------------|----------------------------------|---------------------|---------------------|----------------------------------|---------------------|---------------------|
|                |                                                   |                   |            |                        |                                                 | Relative methylation (Cy-5/Cy-3) | Cy-3 signal (Input) | Cy-5 signal (MeDIP) | Relative methylation (Cy-5/Cy-3) | Cy-3 signal (Input) | Cy-5 signal (MeDIP) |
| A_68_P31675646 | chr18:46371668-46371712                           | NM_178872:571     | Trim36     | INSIDE                 | 0.361                                           | 0.384                            | 2178.47             | 836.93              | 0.139                            | 1795.39             | 248.86              |
| A_68_P27780095 | chr11:48630257-48630301                           | NM_145377:615     | Trim41     | INSIDE                 | 0.366                                           | 0.693                            | 3398.98             | 2354.41             | 0.253                            | 2424.95             | 614.69              |
| A_68_P27780097 | chr11:48630503-48630547                           | NM_145377:369     | Trim41     | INSIDE                 | 0.238                                           | 0.608                            | 3970.23             | 2413.06             | 0.144                            | 3080.04             | 444.73              |
| A_68_P27780098 | chr11:48630599-48630643                           | NM_145377:273     | Trim41     | INSIDE                 | 0.329                                           | 0.491                            | 1747.72             | 857.96              | 0.161                            | 1283.11             | 207.09              |
| A_68_P21476827 | chr2:102241389-102241433                          | NM_020267:-353    | Trim44     | PROMOTER               | 0.524                                           | 0.700                            | 1758.05             | 1230.21             | 0.366                            | 1369.47             | 501.80              |
| A_68_P22372021 | chr3:100726069-100726113                          | NM_001165953:-325 | Trim45     | PROMOTER               | 0.228                                           | 0.724                            | 3143.26             | 2274.43             | 0.165                            | 2238.33             | 369.09              |
| A_68_P22372025 | chr3:100726540-100726584                          | NM_001165953:147  | Trim45     | INSIDE                 | 0.198                                           | 1.549                            | 5632.82             | 8726.45             | 0.307                            | 3943.95             | 1209.26             |
| A_68_P22218907 | chr3:68848966-68849010                            | NM_025863:-324    | Trim59     | PROMOTER               | 0.276                                           | 0.478                            | 1197.29             | 571.94              | 0.132                            | 927.40              | 122.43              |
| A_68_P23293635 | chr4:128561085-128561129                          | NM_178110:-277    | Trim62     | PROMOTER               | 0.322                                           | 0.694                            | 1071.89             | 743.45              | 0.224                            | 794.08              | 177.50              |
| A_68_P23293641 | chr4:128561860-128561904                          | NM_178110:499     | Trim62     | INSIDE                 | 0.545                                           | 0.667                            | 2352.63             | 1569.34             | 0.364                            | 1936.20             | 703.94              |
| A_68_P28157536 | chr11:115992427-115992471                         | NM_178802:-6      | Trim65     | PROMOTER               | 0.243                                           | 0.472                            | 1327.99             | 626.75              | 0.115                            | 1088.63             | 124.89              |
| A_68_P26247722 | chr8:127316654-127316700                          | NM_198632:-242    | Trim67     | PROMOTER               | 0.256                                           | 0.448                            | 1189.03             | 533.27              | 0.115                            | 1006.93             | 115.71              |
| A_68_P26247723 | chr8:127316765-127316809                          | NM_198632:-132    | Trim67     | PROMOTER               | 0.130                                           | 0.582                            | 2110.45             | 1229.32             | 0.076                            | 1611.02             | 122.21              |
| A_68_P26247724 | chr8:127316847-127316891                          | NM_198632:-50     | Trim67     | PROMOTER               | 0.222                                           | 0.629                            | 2976.08             | 1871.69             | 0.140                            | 2437.95             | 340.98              |
| A_68_P26247733 | chr8:127317798-127317842                          | NM_198632:902     | Trim67     | INSIDE                 | 0.636                                           | 0.644                            | 2690.72             | 1732.42             | 0.409                            | 2128.66             | 871.68              |
| A_68_P26247735 | chr8:127318077-127318121                          | NM_198632:1180    | Trim67     | INSIDE                 | 0.178                                           | 0.382                            | 2268.52             | 865.46              | 0.068                            | 1732.63             | 117.89              |
| A_68_P27780212 | chr11:48650835-48650879                           | NM_053166:11217   | Trim7      | INSIDE                 | 0.325                                           | 0.690                            | 1523.39             | 1050.85             | 0.224                            | 1105.36             | 247.47              |
| A_68_P27780214 | chr11:48651115-48651159                           | NM_053166:11497   | Trim7      | INSIDE                 | 0.153                                           | 0.541                            | 2002.24             | 1083.94             | 0.083                            | 1477.48             | 122.07              |
| A_68_P27780290 | chr11:48663076-48663120                           | NM_053166:23459   | Trim7      | INSIDE                 | 0.577                                           | 2.957                            | 4750.74             | 14048.07            | 1.706                            | 3224.86             | 5501.84             |
| A_68_P25508614 | chr7:135153815-135153862                          | NM_001079932:5947 | Trim72     | INSIDE                 | 0.618                                           | 2.597                            | 1699.77             | 4413.51             | 1.604                            | 1251.21             | 2007.20             |
| A_68_P32144293 | chr19:46574614-46574658                           | NM_053100:-1501   | Trim8      | PROMOTER               | 0.368                                           | 0.699                            | 2968.85             | 2076.71             | 0.257                            | 2146.07             | 552.02              |
| A_68_P28520017 | chr12:71447587-71447631                           | NM_001110202:993  | Trim9      | INSIDE                 | 0.504                                           | 0.429                            | 1306.83             | 560.48              | 0.216                            | 1053.01             | 227.62              |
| A_68_P28520022 | chr12:71448035-71448079                           | NM_001110202:545  | Trim9      | INSIDE                 | 0.351                                           | 0.558                            | 2268.98             | 1265.65             | 0.196                            | 1524.69             | 298.25              |
| A_68_P28520026 | chr12:71448401-71448445                           | NM_001110202:179  | Trim9      | INSIDE                 | 0.381                                           | 0.608                            | 867.71              | 527.28              | 0.232                            | 729.99              | 169.06              |
| A_68_P31260730 | chr17:57388800-57388844                           | NM_134125:-51     | Trip10     | DIVERGENT_PROMOTER     | 0.392                                           | 0.608                            | 3559.47             | 2163.18             | 0.238                            | 2651.86             | 631.60              |
| A_68_P20405961 | chr1:84835228-84835272                            | NM_133975:629     | Trip12     | INSIDE                 | 0.203                                           | 1.596                            | 6729.40             | 10740.45            | 0.324                            | 4499.56             | 1458.85             |
| A_68_P20405966 | chr1:84835679-84835723                            | NM_133975:179     | Trip12     | INSIDE                 | 0.448                                           | 0.673                            | 1931.43             | 1299.19             | 0.301                            | 1759.24             | 530.16              |
| A_68_P20405967 | chr1:84835781-84835825                            | NM_133975:77      | Trip12     | INSIDE                 | 0.111                                           | 0.583                            | 2472.51             | 1442.66             | 0.065                            | 1833.90             | 118.44              |
| A_68_P29143148 | chr13:74074758-74074802                           | NM_027182:435     | Trip13     | INSIDE                 | 0.205                                           | 2.800                            | 7233.64             | 20250.81            | 0.575                            | 4920.66             | 2830.36             |
| A_68_P29143150 | chr13:74074924-74074968                           | NM_027182:269     | Trip13     | INSIDE                 | 0.491                                           | 0.462                            | 3704.86             | 1709.81             | 0.227                            | 2739.37             | 620.89              |
| A_68_P31936613 | chr19:6984303-6984347                             | NM_001166370:137  | Trmt112    | INSIDE                 | 0.244                                           | 0.473                            | 2017.31             | 954.86              | 0.116                            | 1482.48             | 171.54              |
| A_68_P31936614 | chr19:6984396-6984443                             | NM_001166370:232  | Trmt112    | INSIDE                 | 0.272                                           | 0.397                            | 1504.42             | 597.01              | 0.108                            | 1094.70             | 118.25              |
| A_68_P31936615 | chr19:6984479-6984523                             | NM_001166370:313  | Trmt112    | INSIDE                 | 0.351                                           | 0.384                            | 1480.45             | 568.66              | 0.135                            | 1145.18             | 154.21              |
| A_68_P30250626 | chr15:58704469-58704513                           | NM_026642:287     | Trmt12     | INSIDE                 | 0.334                                           | 0.599                            | 984.69              | 590.16              | 0.200                            | 773.72              | 154.87              |
| A_68_P30578596 | chr16:18249157-18249201                           | NM_001080999:203  | Trmt2a     | INSIDE                 | 0.480                                           | 0.671                            | 1791.48             | 1202.58             | 0.322                            | 1420.71             | 457.65              |
| A_68_P28536527 | chr12:74387503-74387547                           | NM_029580:174     | Trmt5      | INSIDE                 | 0.239                                           | 0.548                            | 1058.22             | 579.94              | 0.131                            | 899.35              | 117.74              |
| A_68_P21642319 | chr2:132641532-132641578                          | NM_175113:236     | Trmt6      | INSIDE                 | 0.180                                           | 0.537                            | 1786.05             | 958.61              | 0.097                            | 1240.30             | 119.83              |
| A_68_P23311786 | chr4:131885241-131885285                          | NM_027925:191     | Trmau1ap   | INSIDE                 | 0.234                                           | 0.647                            | 1547.09             | 1000.95             | 0.151                            | 1252.65             | 189.76              |
| A_68_P23311790 | chr4:131885707-131885751                          | NM_027925:-275    | Trmau1ap   | PROMOTER               | 0.646                                           | 0.615                            | 1618.76             | 995.18              | 0.397                            | 1438.11             | 570.86              |
| A_68_P23317939 | chr4:133054412-133054456                          | NM_001081156:31   | Trmp1      | INSIDE                 | 0.257                                           | 0.640                            | 2171.98             | 1389.98             | 0.164                            | 1634.57             | 268.81              |
| A_68_P23317940 | chr4:133054507-133054551                          | NM_001081156:-63  | Trmp1      | PROMOTER               | 0.141                                           | 0.584                            | 2921.82             | 1705.71             | 0.083                            | 2092.08             | 172.62              |
| A_68_P32742644 | chrX:147091720-147091764                          | NM_001002272:237  | Tro        | INSIDE                 | 0.324                                           | 1.623                            | 1668.43             | 2707.75             | 0.526                            | 803.83              | 423.10              |
| A_68_P30478054 | chr15:98904927-98904971                           | NM_001162506:-455 | Troap      | PROMOTER               | 0.281                                           | 0.675                            | 1353.53             | 913.56              | 0.189                            | 969.68              | 183.59              |
| A_68_P21579903 | chr2:121096750-121096794                          | NM_013735:350     | Trp53bp1   | INSIDE                 | 0.386                                           | 1.499                            | 10760.68            | 16131.09            | 0.578                            | 7597.34             | 4390.72             |

| ProbeName      | Target position of probe on CpG island microarray | TargetID          | GeneSymbol | CpG island Description | Ratio of relative methylation (TiO2-NP/Vehicle) | Sham group                       |                     |                     | TiO <sub>2</sub> -H group        |                     |                     |
|----------------|---------------------------------------------------|-------------------|------------|------------------------|-------------------------------------------------|----------------------------------|---------------------|---------------------|----------------------------------|---------------------|---------------------|
|                |                                                   |                   |            |                        |                                                 | Relative methylation (Cy-5/Cy-3) | Cy-3 signal (Input) | Cy-5 signal (MeDIP) | Relative methylation (Cy-5/Cy-3) | Cy-3 signal (Input) | Cy-5 signal (MeDIP) |
| A_68_P21579905 | chr2:121097022-121097066                          | NM_013735:78      | Trp53bp1   | INSIDE                 | 0.452                                           | 0.566                            | 2441.59             | 1381.63             | 0.256                            | 2012.26             | 514.89              |
| A_68_P20886548 | chr1:184339548-184339592                          | NM_173378:273     | Trp53bp2   | INSIDE                 | 0.535                                           | 0.618                            | 889.01              | 549.56              | 0.331                            | 808.57              | 267.35              |
| A_68_P21433077 | chr2:93028116-93028160                            | NM_001025246:398  | Trp53i11   | INSIDE                 | 0.158                                           | 0.454                            | 2258.93             | 1026.01             | 0.072                            | 1723.33             | 123.44              |
| A_68_P21433078 | chr2:93028237-93028293                            | NM_001025246:524  | Trp53i11   | INSIDE                 | 0.070                                           | 1.431                            | 1844.01             | 2638.20             | 0.100                            | 1150.48             | 114.97              |
| A_68_P21433080 | chr2:93028458-93028502                            | NM_001025246:740  | Trp53i11   | INSIDE                 | 0.216                                           | 0.666                            | 1377.28             | 917.76              | 0.144                            | 1043.00             | 149.90              |
| A_68_P22728289 | chr4:11083171-11083217                            | NM_001199105:393  | Trp53inp1  | PROMOTER               | 0.292                                           | 0.528                            | 1082.70             | 572.05              | 0.155                            | 783.13              | 121.02              |
| A_68_P22728294 | chr4:11083669-11083713                            | NM_001199105:103  | Trp53inp1  | INSIDE                 | 0.663                                           | 0.473                            | 1751.11             | 828.77              | 0.314                            | 1542.51             | 484.14              |
| A_68_P22728295 | chr4:11083786-11083830                            | NM_001199105:221  | Trp53inp1  | INSIDE                 | 0.560                                           | 0.563                            | 1881.95             | 1060.08             | 0.316                            | 1447.62             | 457.02              |
| A_68_P22728296 | chr4:11083878-11083922                            | NM_001199105:313  | Trp53inp1  | INSIDE                 | 0.408                                           | 0.443                            | 2227.67             | 986.41              | 0.181                            | 1725.74             | 311.95              |
| A_68_P21765246 | chr2:155207391-155207435                          | NM_178111:179     | Trp53inp2  | PROMOTER               | 0.252                                           | 0.659                            | 3385.42             | 2231.52             | 0.166                            | 2563.74             | 425.32              |
| A_68_P21765252 | chr2:155208027-155208072                          | NM_178111:458     | Trp53inp2  | INSIDE                 | 0.389                                           | 0.631                            | 1550.89             | 978.36              | 0.246                            | 1258.39             | 309.06              |
| A_68_P21765289 | chr2:155212485-155212529                          | NM_178111:4915    | Trp53inp2  | INSIDE                 | 0.494                                           | 1.369                            | 3149.57             | 4313.11             | 0.677                            | 2137.30             | 1446.26             |
| A_68_P21831888 | chr2:166612033-166612077                          | NM_023815:7212    | Trp53rk    | PROMOTER               | 0.129                                           | 3.650                            | 3562.89             | 13005.70            | 0.471                            | 2209.23             | 1041.49             |
| A_68_P26743634 | chr9:95650227-95650271                            | NM_011643:529     | Trpc1      | INSIDE                 | 0.269                                           | 0.644                            | 1039.10             | 669.39              | 0.173                            | 881.73              | 152.71              |
| A_68_P22145981 | chr3:53959830-53959874                            | NM_016984:173     | Trpc4      | PROMOTER               | 0.482                                           | 0.592                            | 1367.19             | 808.74              | 0.285                            | 1112.73             | 317.09              |
| A_68_P21767075 | chr2:155517577-155517621                          | NM_001163452:522  | Trpc4ap    | INSIDE                 | 0.185                                           | 0.745                            | 5254.94             | 3915.07             | 0.137                            | 3538.16             | 486.40              |
| A_68_P29064233 | chr13:56989277-56989325                           | NM_012035:7649    | Trpc7      | INSIDE                 | 0.598                                           | 3.530                            | 1275.13             | 4500.65             | 2.110                            | 856.97              | 1807.91             |
| A_68_P32010023 | chr19:22213713-22213757                           | NM_001035239:128  | Trpm3      | INSIDE                 | 0.207                                           | 0.633                            | 1092.36             | 691.78              | 0.131                            | 890.32              | 116.73              |
| A_68_P32010024 | chr19:22213827-22213871                           | NM_001035239:242  | Trpm3      | INSIDE                 | 0.296                                           | 0.576                            | 1073.25             | 617.71              | 0.170                            | 900.06              | 153.11              |
| A_68_P25092468 | chr7:52588927-52588971                            | NM_175130:202     | Trpm4      | INSIDE                 | 0.536                                           | 0.543                            | 2576.90             | 1399.29             | 0.291                            | 1828.71             | 532.36              |
| A_68_P31992848 | chr19:18824278-18824322                           | NM_153417:172     | Trpm6      | PROMOTER               | 0.224                                           | 0.525                            | 1331.08             | 698.30              | 0.118                            | 1033.08             | 121.53              |
| A_68_P30207180 | chr15:50721578-50721632                           | NM_032000:17      | Trps1      | PROMOTER               | 0.035                                           | 1.391                            | 3787.97             | 5268.18             | 0.049                            | 2339.62             | 114.92              |
| A_68_P30207182 | chr15:50721909-50721953                           | NM_032000:343     | Trps1      | PROMOTER               | 0.191                                           | 0.533                            | 2195.85             | 1171.01             | 0.102                            | 1747.98             | 177.69              |
| A_68_P30207183 | chr15:50721969-50722024                           | NM_032000:409     | Trps1      | PROMOTER               | 0.315                                           | 0.446                            | 1413.75             | 629.93              | 0.140                            | 1070.76             | 150.24              |
| A_68_P24162461 | chr5:145528855-145528900                          | NM_001081362:783  | Trrap      | DIVERGENT_PROMOTER     | 0.345                                           | 0.692                            | 1276.24             | 883.62              | 0.239                            | 930.82              | 222.09              |
| A_68_P24162465 | chr5:145529208-145529252                          | NM_001081362:430  | Trrap      | DIVERGENT_PROMOTER     | 0.299                                           | 0.611                            | 1448.64             | 885.12              | 0.183                            | 1176.65             | 214.85              |
| A_68_P21092313 | chr2:28496774-28496818                            | NM_022887:34      | Tsc1       | INSIDE                 | 0.452                                           | 0.459                            | 1582.59             | 726.76              | 0.208                            | 1399.56             | 290.56              |
| A_68_P29733545 | chr14:76814748-76814792                           | NM_207652:857     | Tsc22d1    | PROMOTER               | 0.552                                           | 0.670                            | 1552.87             | 1040.69             | 0.370                            | 1208.06             | 446.93              |
| A_68_P29733550 | chr14:76815819-76815868                           | NM_207652:216     | Tsc22d1    | INSIDE                 | 0.337                                           | 0.659                            | 1206.39             | 794.62              | 0.222                            | 889.10              | 197.56              |
| A_68_P22168170 | chr3:58220169-58220213                            | NM_001081229:580  | Tsc22d2    | INSIDE                 | 0.240                                           | 0.426                            | 1533.22             | 653.35              | 0.102                            | 1154.07             | 117.94              |
| A_68_P22168171 | chr3:58220304-58220348                            | NM_001081229:716  | Tsc22d2    | INSIDE                 | 0.230                                           | 0.512                            | 2654.64             | 1358.59             | 0.118                            | 1937.31             | 228.40              |
| A_68_P22168174 | chr3:58220683-58220727                            | NM_001081229:1094 | Tsc22d2    | INSIDE                 | 0.306                                           | 0.620                            | 1368.55             | 849.10              | 0.190                            | 1397.48             | 265.58              |
| A_68_P22168178 | chr3:58221125-58221170                            | NM_001081229:1537 | Tsc22d2    | INSIDE                 | 0.232                                           | 0.391                            | 1634.68             | 639.56              | 0.091                            | 1344.83             | 121.81              |
| A_68_P32700055 | chrX:137132673-137132722                          | NM_001077364:2364 | Tsc22d3    | INSIDE                 | 0.135                                           | 1.560                            | 1367.22             | 2133.18             | 0.211                            | 569.62              | 119.94              |
| A_68_P32700071 | chrX:137134752-137134796                          | NM_001077364:287  | Tsc22d3    | INSIDE                 | 0.398                                           | 3.957                            | 5767.82             | 22822.44            | 1.575                            | 2608.73             | 4107.70             |
| A_68_P32700072 | chrX:137134843-137134887                          | NM_001077364:197  | Tsc22d3    | INSIDE                 | 0.339                                           | 7.001                            | 3913.06             | 27395.46            | 2.371                            | 1903.95             | 4514.37             |
| A_68_P24946865 | chr7:3645526-3645571                              | NM_024168:561     | Tsen34     | PROMOTER               | 0.235                                           | 0.434                            | 1474.09             | 640.26              | 0.102                            | 1181.30             | 120.83              |
| A_68_P24946869 | chr7:3645931-3645975                              | NM_024168:157     | Tsen34     | PROMOTER               | 0.181                                           | 0.722                            | 2688.92             | 1942.53             | 0.131                            | 1972.03             | 258.20              |
| A_68_P28155496 | chr11:115676513-115676557                         | NM_029557:482     | Tsen54     | INSIDE                 | 0.222                                           | 0.409                            | 1575.38             | 644.19              | 0.091                            | 1320.59             | 120.08              |
| A_68_P28155497 | chr11:115676636-115676680                         | NM_029557:606     | Tsen54     | INSIDE                 | 0.433                                           | 0.595                            | 975.44              | 580.67              | 0.258                            | 697.46              | 179.61              |
| A_68_P20156312 | chr1:37921635-37921679                            | NM_207228:268     | Tsga10     | INSIDE                 | 0.589                                           | 0.734                            | 2196.50             | 1611.88             | 0.432                            | 1827.78             | 789.63              |
| A_68_P24333613 | chr6:30643690-30643734                            | NM_031998:30      | Tsga14     | PROMOTER               | 0.233                                           | 0.486                            | 1368.04             | 664.28              | 0.113                            | 1098.58             | 124.28              |
| A_68_P21848231 | chr2:169459132-169459176                          | NM_080455:9       | Tshz2      | INSIDE                 | 0.233                                           | 0.442                            | 1443.67             | 638.70              | 0.103                            | 1160.36             | 119.75              |
| A_68_P32572889 | chrX:100643328-100643372                          | NR_002844:16495   | Tsix       | INSIDE                 | 0.425                                           | 3.366                            | 7222.62             | 24314.54            | 1.431                            | 2843.03             | 4068.66             |

| ProbeName      | Target position of probe on CpG island microarray | TargetID           | GeneSymbol | CpG island Description | Ratio of relative methylation (TiO2-NP/Vehicle) | Sham group                       |                     |                     | TiO <sub>2</sub> -H group        |                     |                     |
|----------------|---------------------------------------------------|--------------------|------------|------------------------|-------------------------------------------------|----------------------------------|---------------------|---------------------|----------------------------------|---------------------|---------------------|
|                |                                                   |                    |            |                        |                                                 | Relative methylation (Cy-5/Cy-3) | Cy-3 signal (Input) | Cy-5 signal (MeDIP) | Relative methylation (Cy-5/Cy-3) | Cy-3 signal (Input) | Cy-5 signal (MeDIP) |
| A_68_P25355274 | chr7:105509904-105509948                          | NM_001168539:-88   | Tsku       | PROMOTER               | 0.561                                           | 0.488                            | 1169.56             | 570.41              | 0.273                            | 1020.35             | 279.06              |
| A_68_P20551183 | chr1:120207585-120207629                          | NM_011650:103      | Tsn        | INSIDE                 | 0.648                                           | 0.539                            | 1932.44             | 1042.17             | 0.349                            | 1603.20             | 560.27              |
| A_68_P24287930 | chr6:21801755-21801799                            | NM_173007:739      | Tspan12    | INSIDE                 | 0.325                                           | 0.579                            | 2836.66             | 1641.35             | 0.188                            | 2156.87             | 406.19              |
| A_68_P24287932 | chr6:21801985-21802029                            | NM_173007:509      | Tspan12    | INSIDE                 | 0.538                                           | 0.517                            | 2203.92             | 1138.52             | 0.278                            | 1836.71             | 510.11              |
| A_68_P24287933 | chr6:21802094-21802138                            | NM_173007:399      | Tspan12    | INSIDE                 | 0.575                                           | 0.711                            | 1841.57             | 1309.71             | 0.409                            | 1520.64             | 622.07              |
| A_68_P28356086 | chr12:36768656-36768700                           | NM_025359:387      | Tspan13    | INSIDE                 | 0.240                                           | 0.624                            | 4176.37             | 2605.91             | 0.150                            | 3185.85             | 477.85              |
| A_68_P28356088 | chr12:36768830-36768874                           | NM_025359:213      | Tspan13    | INSIDE                 | 0.199                                           | 0.604                            | 3258.81             | 1968.73             | 0.120                            | 2354.42             | 282.63              |
| A_68_P29560572 | chr14:41780482-41780526                           | NM_145928:-408     | Tspan14    | PROMOTER               | 0.189                                           | 0.561                            | 1341.96             | 753.37              | 0.106                            | 1101.77             | 117.12              |
| A_68_P29560588 | chr14:41779590-41779634                           | NM_145928:484      | Tspan14    | INSIDE                 | 0.581                                           | 0.520                            | 1838.70             | 955.94              | 0.302                            | 1504.30             | 454.60              |
| A_68_P29560589 | chr14:41779724-41779768                           | NM_145928:350      | Tspan14    | INSIDE                 | 0.652                                           | 0.589                            | 1931.70             | 1138.56             | 0.384                            | 1656.26             | 636.34              |
| A_68_P29560592 | chr14:41780099-41780143                           | NM_145928:-24      | Tspan14    | PROMOTER               | 0.598                                           | 0.567                            | 1621.41             | 918.61              | 0.339                            | 1295.42             | 438.68              |
| A_68_P27184874 | chr10:61693685-61693729                           | NM_197996:260      | Tspan15    | INSIDE                 | 0.372                                           | 0.456                            | 2279.58             | 1039.91             | 0.170                            | 1826.28             | 310.29              |
| A_68_P21434081 | chr2:93174589-93174633                            | NM_183180:34       | Tspan18    | INSIDE                 | 0.644                                           | 0.636                            | 822.85              | 523.40              | 0.409                            | 729.18              | 298.47              |
| A_68_P22382654 | chr3:102538511-102538562                          | NM_027533:-156     | Tspan2     | PROMOTER               | 0.289                                           | 0.588                            | 1057.44             | 621.30              | 0.170                            | 758.81              | 128.76              |
| A_68_P22382659 | chr3:102539232-102539276                          | NM_027533:562      | Tspan2     | INSIDE                 | 0.468                                           | 0.485                            | 3086.63             | 1495.77             | 0.227                            | 2452.08             | 556.29              |
| A_68_P25589127 | chr7:148667760-148667804                          | NM_053082:6644     | Tspan4     | INSIDE                 | 0.242                                           | 1.392                            | 4036.73             | 5617.31             | 0.337                            | 2621.74             | 883.40              |
| A_68_P22570423 | chr3:138406072-138406116                          | NM_019571:936      | Tspan5     | INSIDE                 | 0.298                                           | 0.557                            | 5007.03             | 2790.18             | 0.166                            | 3779.51             | 627.44              |
| A_68_P32749010 | chrX:148776690-148776734                          | NM_029836:315      | Tspyl2     | INSIDE                 | 0.232                                           | 1.354                            | 4174.90             | 5653.56             | 0.315                            | 1736.77             | 546.61              |
| A_68_P27056226 | chr10:34017317-34017361                           | NM_030203:112      | Tspyl4     | INSIDE                 | 0.281                                           | 0.464                            | 1299.68             | 602.88              | 0.130                            | 1003.98             | 130.86              |
| A_68_P27056228 | chr10:34017531-34017575                           | NM_030203:326      | Tspyl4     | INSIDE                 | 0.617                                           | 0.630                            | 1544.81             | 972.47              | 0.388                            | 1238.09             | 480.83              |
| A_68_P27056229 | chr10:34017638-34017682                           | NM_030203:434      | Tspyl4     | INSIDE                 | 0.239                                           | 0.614                            | 1028.06             | 631.73              | 0.147                            | 805.14              | 118.10              |
| A_68_P30125732 | chr15:33617536-33617580                           | NM_001085421:80    | Tspyl5     | INSIDE                 | 0.516                                           | 0.643                            | 818.41              | 525.87              | 0.331                            | 724.43              | 240.09              |
| A_68_P30125734 | chr15:33617702-33617758                           | NM_001085421:-92   | Tspyl5     | PROMOTER               | 0.345                                           | 0.439                            | 1748.06             | 767.52              | 0.151                            | 1378.11             | 208.73              |
| A_68_P28314942 | chr12:29436931-29436975                           | NM_201357:260      | Tssc1      | INSIDE                 | 0.220                                           | 0.577                            | 1189.84             | 686.99              | 0.127                            | 895.52              | 113.69              |
| A_68_P25598461 | chr7:150254989-150255033                          | NM_001115085:-262  | Tssc4      | PROMOTER               | 0.376                                           | 0.561                            | 1030.85             | 577.91              | 0.211                            | 694.88              | 146.50              |
| A_68_P25598465 | chr7:150255389-150255433                          | NM_001115085:138   | Tssc4      | INSIDE                 | 0.117                                           | 0.590                            | 3081.52             | 1817.23             | 0.069                            | 2287.58             | 158.45              |
| A_68_P25948612 | chr8:72426018-72426066                            | NM_032004:-71      | Tssk6      | PROMOTER               | 0.505                                           | 0.627                            | 991.05              | 621.52              | 0.317                            | 751.56              | 238.08              |
| A_68_P25948613 | chr8:72426109-72426153                            | NM_032004:17       | Tssk6      | INSIDE                 | 0.431                                           | 0.712                            | 3179.15             | 2263.23             | 0.307                            | 2270.51             | 697.43              |
| A_68_P22887152 | chr4:46151235-46151279                            | NM_173033:91       | Tstd2      | INSIDE                 | 0.576                                           | 0.516                            | 2509.76             | 1294.07             | 0.297                            | 1766.84             | 525.10              |
| A_68_P31206979 | chr17:46592282-46592326                           | NM_001162864:32320 | Ttbb1      | INSIDE                 | 0.321                                           | 0.442                            | 2903.34             | 1284.53             | 0.142                            | 2013.32             | 286.35              |
| A_68_P31206981 | chr17:46592555-46592609                           | NM_001162864:32042 | Ttbb1      | INSIDE                 | 0.392                                           | 1.717                            | 3863.90             | 6635.69             | 0.673                            | 2504.05             | 1685.58             |
| A_68_P31206982 | chr17:46592667-46592712                           | NM_001162864:31935 | Ttbb1      | INSIDE                 | 0.392                                           | 1.403                            | 1399.62             | 1963.16             | 0.549                            | 1059.83             | 582.08              |
| A_68_P21577444 | chr2:120675934-120675978                          | NM_001024856:198   | Ttbb2      | INSIDE                 | 0.272                                           | 0.591                            | 955.67              | 564.61              | 0.161                            | 771.32              | 124.01              |
| A_68_P27752129 | chr11:43561327-43561371                           | NM_133795:127      | Ttc1       | INSIDE                 | 0.268                                           | 0.579                            | 1558.11             | 901.90              | 0.155                            | 1154.64             | 179.09              |
| A_68_P22044439 | chr3:33698918-33698962                            | NM_025978:-176     | Ttc14      | PROMOTER               | 0.562                                           | 0.275                            | 2184.87             | 601.13              | 0.155                            | 1810.25             | 279.75              |
| A_68_P21117412 | chr2:32631071-32631115                            | NM_177384:-189     | Ttc16      | DIVERGENT_PROMOTER     | 0.234                                           | 0.368                            | 1711.38             | 628.97              | 0.086                            | 1341.61             | 115.48              |
| A_68_P26875193 | chr9:119846837-119846881                          | NM_028735:135      | Ttc21a     | INSIDE                 | 0.427                                           | 0.588                            | 1305.35             | 767.49              | 0.251                            | 976.75              | 245.21              |
| A_68_P23984910 | chr5:111714358-111714402                          | NM_024477:405559   | Ttc28      | INSIDE                 | 0.289                                           | 1.503                            | 3161.06             | 4751.77             | 0.435                            | 2197.69             | 954.94              |
| A_68_P29982442 | chr5:5135931-5135975                              | NM_026213:393      | Ttc33      | INSIDE                 | 0.215                                           | 0.512                            | 2213.53             | 1132.96             | 0.110                            | 1641.21             | 180.60              |
| A_68_P26469621 | chr9:44607463-44607507                            | NM_138951:3550     | Ttc36      | INSIDE                 | 0.220                                           | 0.554                            | 2445.69             | 1355.52             | 0.122                            | 1759.58             | 214.34              |
| A_68_P23200902 | chr4:109079361-109079406                          | NM_153392:-321     | Ttc39a     | PROMOTER               | 0.284                                           | 0.620                            | 851.96              | 528.47              | 0.176                            | 666.06              | 117.44              |
| A_68_P23200903 | chr4:109079476-109079520                          | NM_153392:-206     | Ttc39a     | PROMOTER               | 0.437                                           | 0.469                            | 1459.99             | 684.90              | 0.205                            | 1153.72             | 236.25              |
| A_68_P23061865 | chr4:82969752-82969796                            | NM_027238:319      | Ttc39b     | INSIDE                 | 0.354                                           | 0.615                            | 1060.46             | 651.68              | 0.217                            | 895.67              | 194.79              |
| A_68_P31501878 | chr18:12802774-12802818                           | NM_028341:755      | Ttc39c     | INSIDE                 | 0.223                                           | 0.558                            | 1396.43             | 778.72              | 0.124                            | 992.46              | 123.39              |

| ProbeName      | Target position of probe on CpG island microarray | TargetID          | GeneSymbol | CpG island Description | Ratio of relative methylation (TiO2-NP/Vehicle) | Sham group                       |                     |                     | TiO <sub>2</sub> -H group        |                     |                     |
|----------------|---------------------------------------------------|-------------------|------------|------------------------|-------------------------------------------------|----------------------------------|---------------------|---------------------|----------------------------------|---------------------|---------------------|
|                |                                                   |                   |            |                        |                                                 | Relative methylation (Cy-5/Cy-3) | Cy-3 signal (Input) | Cy-5 signal (MeDIP) | Relative methylation (Cy-5/Cy-3) | Cy-3 signal (Input) | Cy-5 signal (MeDIP) |
| A_68_P23185865 | chr4:106351237-106351283                          | NM_001172073:31   | Ttc4       | INSIDE                 | 0.292                                           | 0.596                            | 911.39              | 542.97              | 0.174                            | 694.48              | 121.01              |
| A_68_P28581895 | chr12:82732734-82732780                           | NM_001033149:401  | Ttc9       | INSIDE                 | 0.144                                           | 0.544                            | 2004.45             | 1091.41             | 0.078                            | 1490.13             | 116.75              |
| A_68_P25018371 | chr7:28438749-28438793                            | NM_028417:-172    | Ttc9b      | PROMOTER               | 0.154                                           | 0.678                            | 3610.47             | 2446.11             | 0.104                            | 2537.41             | 264.46              |
| A_68_P22372357 | chr3:100773219-100773269                          | NM_001013026:342  | Ttf2       | INSIDE                 | 0.226                                           | 0.574                            | 1209.86             | 695.00              | 0.130                            | 914.88              | 118.99              |
| A_68_P22372358 | chr3:100773375-100773419                          | NM_001013026:190  | Ttf2       | INSIDE                 | 0.222                                           | 0.456                            | 1603.65             | 731.80              | 0.101                            | 1212.38             | 122.64              |
| A_68_P22372359 | chr3:100773528-100773572                          | NM_001013026:36   | Ttf2       | INSIDE                 | 0.242                                           | 0.379                            | 1562.60             | 591.71              | 0.092                            | 1281.75             | 117.52              |
| A_68_P26685860 | chr9:83728064-83728108                            | NM_001110265:-209 | Ttk        | PROMOTER               | 0.251                                           | 0.642                            | 1466.07             | 941.56              | 0.161                            | 1124.79             | 180.98              |
| A_68_P30388853 | chr15:83341230-83341274                           | NM_178869:85      | Ttl1       | INSIDE                 | 0.316                                           | 0.708                            | 2039.81             | 1444.84             | 0.224                            | 1502.97             | 336.53              |
| A_68_P30388854 | chr15:83341412-83341456                           | NM_178869:-97     | Ttl1       | PROMOTER               | 0.503                                           | 0.526                            | 2594.20             | 1364.28             | 0.264                            | 1902.91             | 502.95              |
| A_68_P23441977 | chr4:155409010-155409054                          | NM_029264:15894   | Ttl10      | INSIDE                 | 0.600                                           | 0.598                            | 988.82              | 590.88              | 0.358                            | 850.24              | 304.68              |
| A_68_P20349750 | chr1:74708445-74708489                            | NM_001014974:139  | Ttl4       | INSIDE                 | 0.522                                           | 0.412                            | 2042.66             | 842.41              | 0.215                            | 1604.77             | 345.34              |
| A_68_P28042483 | chr11:95985716-95985760                           | NM_172799:-9361   | Ttl6       | PROMOTER               | 0.512                                           | 0.665                            | 958.90              | 637.64              | 0.341                            | 944.08              | 321.73              |
| A_68_P30422257 | chr15:88785384-88785428                           | NM_172818:-558    | Ttl8       | PROMOTER               | 0.144                                           | 0.634                            | 1698.15             | 1077.19             | 0.091                            | 1346.29             | 122.97              |
| A_68_P28149096 | chr11:114537102-114537146                         | NM_053273:343     | Ttyh2      | INSIDE                 | 0.338                                           | 0.584                            | 1186.00             | 692.48              | 0.197                            | 917.64              | 181.19              |
| A_68_P25405561 | chr7:116154611-116154655                          | NM_021885:239     | Tub        | INSIDE                 | 0.528                                           | 0.428                            | 1254.12             | 536.30              | 0.226                            | 1062.98             | 240.08              |
| A_68_P20352742 | chr1:75216148-75216195                            | NM_009447:-343    | Tuba4a     | PROMOTER               | 0.252                                           | 0.615                            | 929.77              | 572.00              | 0.155                            | 785.47              | 121.96              |
| A_68_P20352744 | chr1:75216331-75216375                            | NM_009447:-524    | Tuba4a     | PROMOTER               | 0.502                                           | 0.657                            | 1219.81             | 801.55              | 0.330                            | 938.84              | 309.65              |
| A_68_P20352745 | chr1:75216487-75216531                            | NM_009447:-680    | Tuba4a     | PROMOTER               | 0.099                                           | 0.597                            | 2801.56             | 1673.20             | 0.059                            | 2084.90             | 123.34              |
| A_68_P28936499 | chr13:34169593-34169637                           | NM_009450:263     | Tubb2a     | INSIDE                 | 0.434                                           | 0.707                            | 3359.06             | 2376.05             | 0.307                            | 2486.24             | 763.25              |
| A_68_P28936501 | chr13:34169775-34169819                           | NM_009450:81      | Tubb2a     | INSIDE                 | 0.507                                           | 0.539                            | 1638.25             | 882.70              | 0.273                            | 1315.64             | 359.39              |
| A_68_P28936822 | chr13:34222312-34222356                           | NM_023716:-111    | Tubb2b     | PROMOTER               | 0.070                                           | 1.945                            | 5328.16             | 10364.36            | 0.137                            | 3246.00             | 445.09              |
| A_68_P28936823 | chr13:34222460-34222504                           | NM_023716:-259    | Tubb2b     | PROMOTER               | 0.095                                           | 1.885                            | 9046.41             | 17054.26            | 0.179                            | 5512.25             | 986.47              |
| A_68_P21070645 | chr2:25079554-25079599                            | NM_146116:646     | Tubb2c     | INSIDE                 | 0.409                                           | 0.491                            | 1200.14             | 589.19              | 0.201                            | 968.76              | 194.37              |
| A_68_P21070648 | chr2:25079927-25079971                            | NM_146116:274     | Tubb2c     | INSIDE                 | 0.286                                           | 0.550                            | 2642.39             | 1453.91             | 0.157                            | 2034.13             | 319.71              |
| A_68_P21070649 | chr2:25080027-25080071                            | NM_146116:174     | Tubb2c     | INSIDE                 | 0.409                                           | 0.478                            | 1412.01             | 675.35              | 0.196                            | 1110.29             | 217.23              |
| A_68_P21070651 | chr2:25080168-25080218                            | NM_146116:30      | Tubb2c     | INSIDE                 | 0.255                                           | 0.536                            | 1514.11             | 810.85              | 0.137                            | 1178.49             | 161.17              |
| A_68_P21070652 | chr2:25080248-25080297                            | NM_146116:-50     | Tubb2c     | PROMOTER               | 0.409                                           | 0.423                            | 1560.81             | 659.82              | 0.173                            | 1088.84             | 188.17              |
| A_68_P21070655 | chr2:25080672-25080722                            | NM_146116:-474    | Tubb2c     | PROMOTER               | 0.277                                           | 0.375                            | 1654.74             | 620.62              | 0.104                            | 1188.67             | 123.65              |
| A_68_P26239786 | chr8:125935222-125935266                          | NM_023279:-219    | Tubb3      | PROMOTER               | 0.654                                           | 0.589                            | 1583.80             | 932.19              | 0.385                            | 1419.24             | 546.12              |
| A_68_P31259987 | chr17:57226887-57226931                           | NM_009451:297     | Tubb4      | INSIDE                 | 0.279                                           | 0.424                            | 2760.55             | 1170.13             | 0.118                            | 2071.49             | 245.36              |
| A_68_P31259988 | chr17:57226985-57227029                           | NM_009451:199     | Tubb4      | INSIDE                 | 0.555                                           | 0.642                            | 1049.31             | 673.97              | 0.357                            | 849.33              | 302.91              |
| A_68_P31161200 | chr17:35975270-35975315                           | NM_011655:-46     | Tubb5      | DIVERGENT_PROMOTER     | 0.164                                           | 0.643                            | 1931.59             | 1241.20             | 0.105                            | 1407.87             | 147.99              |
| A_68_P31791610 | chr18:67551054-67551098                           | NM_026473:692     | Tubb6      | INSIDE                 | 0.433                                           | 0.494                            | 1698.06             | 838.42              | 0.214                            | 1422.44             | 304.23              |
| A_68_P28072085 | chr11:100981492-100981536                         | NM_134024:70      | Tubg1      | INSIDE                 | 0.181                                           | 0.493                            | 2031.08             | 1001.35             | 0.089                            | 1424.27             | 126.75              |
| A_68_P28072252 | chr11:101017412-101017456                         | NM_134028:237     | Tubg2      | INSIDE                 | 0.480                                           | 0.569                            | 1803.32             | 1026.03             | 0.273                            | 1412.35             | 385.83              |
| A_68_P25581865 | chr7:147222114-147222158                          | NM_133755:113     | Tubgcp2    | INSIDE                 | 0.670                                           | 0.693                            | 2465.37             | 1707.82             | 0.464                            | 2077.08             | 963.56              |
| A_68_P25143365 | chr7:63049393-63049437                            | NM_146190:-103    | Tubgcp5    | PROMOTER               | 0.536                                           | 1.392                            | 4737.08             | 6594.67             | 0.747                            | 3718.33             | 2776.19             |
| A_68_P30423271 | chr15:88953473-88953517                           | NM_001163319:86   | Tubgcp6    | INSIDE                 | 0.185                                           | 2.593                            | 4119.29             | 10679.64            | 0.481                            | 2792.71             | 1342.48             |
| A_68_P30423272 | chr15:88953588-88953632                           | NM_001163319:-30  | Tubgcp6    | PROMOTER               | 0.283                                           | 1.407                            | 1974.38             | 2777.34             | 0.398                            | 1327.48             | 528.47              |
| A_68_P25500776 | chr7:133630670-133630714                          | NM_001163713:-176 | Tufm       | PROMOTER               | 0.425                                           | 0.554                            | 1769.13             | 980.78              | 0.236                            | 1292.11             | 304.30              |
| A_68_P25500777 | chr7:133630795-133630839                          | NM_001163713:-52  | Tufm       | PROMOTER               | 0.371                                           | 0.604                            | 2306.18             | 1393.18             | 0.224                            | 1675.38             | 375.58              |
| A_68_P25500779 | chr7:133631050-133631094                          | NM_001163713:204  | Tufm       | INSIDE                 | 0.184                                           | 0.520                            | 1427.60             | 741.82              | 0.095                            | 1224.95             | 116.81              |
| A_68_P27553116 | chr11:3549120-3549164                             | NR_002321:-331    | Tug1       | DIVERGENT_PROMOTER     | 0.583                                           | 0.551                            | 1689.80             | 930.29              | 0.321                            | 1397.58             | 448.47              |
| A_68_P24838521 | chr6:128305667-128305711                          | NM_011657:181     | Tulp3      | INSIDE                 | 0.145                                           | 0.746                            | 6524.39             | 4868.60             | 0.108                            | 4634.17             | 501.95              |

| ProbeName      | Target position of probe on CpG island microarray | TargetID          | GeneSymbol | CpG island Description | Ratio of relative methylation (TiO2-NP/Vehicle) | Sham group                       |                     |                     | TiO <sub>2</sub> -H group        |                     |                     |
|----------------|---------------------------------------------------|-------------------|------------|------------------------|-------------------------------------------------|----------------------------------|---------------------|---------------------|----------------------------------|---------------------|---------------------|
|                |                                                   |                   |            |                        |                                                 | Relative methylation (Cy-5/Cy-3) | Cy-3 signal (Input) | Cy-5 signal (MeDIP) | Relative methylation (Cy-5/Cy-3) | Cy-3 signal (Input) | Cy-5 signal (MeDIP) |
| A_68_P23111977 | chr4:93002257-93002301                            | NM_026954:-76     | Tusc1      | PROMOTER               | 0.623                                           | 0.432                            | 1974.38             | 853.07              | 0.269                            | 1522.63             | 410.16              |
| A_68_P26809576 | chr9:107465904-107465952                          | NM_019742:343     | Tusc2      | INSIDE                 | 0.239                                           | 0.642                            | 1442.79             | 925.64              | 0.154                            | 1125.52             | 172.87              |
| A_68_P25798745 | chr8:40068907-40068951                            | NM_030254:8       | Tusc3      | INSIDE                 | 0.257                                           | 0.501                            | 2686.88             | 1347.04             | 0.129                            | 2025.98             | 261.31              |
| A_68_P26801828 | chr9:106105584-106105628                          | NM_011876:168     | Twf2       | INSIDE                 | 0.598                                           | 0.689                            | 1170.24             | 806.50              | 0.412                            | 1168.39             | 481.73              |
| A_68_P28344354 | chr12:34642575-34642619                           | NM_011658:61      | Twist1     | INSIDE                 | 0.479                                           | 0.582                            | 2241.59             | 1305.33             | 0.279                            | 1874.20             | 522.72              |
| A_68_P28344357 | chr12:34643155-34643199                           | NM_011658:641     | Twist1     | INSIDE                 | 0.208                                           | 0.519                            | 2328.00             | 1207.52             | 0.108                            | 1817.89             | 196.54              |
| A_68_P20444769 | chr1:93698784-93698828                            | NM_007855:753     | Twist2     | INSIDE                 | 0.465                                           | 0.527                            | 1498.21             | 789.11              | 0.245                            | 1092.66             | 267.35              |
| A_68_P20444771 | chr1:93699116-93699160                            | NM_007855:1085    | Twist2     | INSIDE                 | 0.534                                           | 0.530                            | 1369.72             | 726.43              | 0.283                            | 1052.66             | 298.32              |
| A_68_P23297755 | chr4:129318416-129318460                          | NM_001199695:-129 | Txlna      | PROMOTER               | 0.333                                           | 0.698                            | 1677.30             | 1170.21             | 0.232                            | 1301.70             | 302.60              |
| A_68_P32791133 | chrX:159266782-159266826                          | NM_178935:527     | Txlng      | INSIDE                 | 0.229                                           | 2.150                            | 4533.73             | 9746.57             | 0.493                            | 1915.65             | 945.02              |
| A_68_P32791135 | chrX:159266933-159266977                          | NM_178935:377     | Txlng      | INSIDE                 | 0.234                                           | 2.256                            | 4704.49             | 10614.11            | 0.527                            | 2013.52             | 1061.48             |
| A_68_P22948240 | chr4:57968866-57968910                            | NM_011660:395     | Txn1       | INSIDE                 | 0.618                                           | 0.562                            | 1046.69             | 588.20              | 0.347                            | 910.36              | 316.27              |
| A_68_P30356630 | chr15:77759323-77759367                           | NM_019913:80      | Txn2       | INSIDE                 | 0.491                                           | 0.516                            | 1660.39             | 857.00              | 0.253                            | 1292.87             | 327.33              |
| A_68_P30356632 | chr15:77759535-77759579                           | NM_019913:-132    | Txn2       | PROMOTER               | 0.387                                           | 0.738                            | 4818.93             | 3558.05             | 0.286                            | 3258.39             | 931.89              |
| A_68_P30546420 | chr16:11134105-11134152                           | NM_029582:497     | Txndc11    | INSIDE                 | 0.124                                           | 0.494                            | 2990.76             | 1478.87             | 0.062                            | 2120.31             | 130.46              |
| A_68_P30546421 | chr16:11134214-11134258                           | NM_029582:389     | Txndc11    | INSIDE                 | 0.214                                           | 0.540                            | 1251.05             | 675.46              | 0.116                            | 1053.64             | 121.97              |
| A_68_P29056625 | chr13:55816369-55816420                           | NM_175150:384     | Txndc15    | INSIDE                 | 0.215                                           | 0.578                            | 1333.07             | 770.55              | 0.124                            | 943.04              | 117.21              |
| A_68_P29569510 | chr14:45839181-45839225                           | NM_172597:-133    | Txndc16    | DIVERGENT_PROMOTER     | 0.453                                           | 0.628                            | 1068.30             | 671.23              | 0.284                            | 530.92              | 150.99              |
| A_68_P31771006 | chr18:63851716-63851760                           | NM_016792:275     | Txn11      | INSIDE                 | 0.180                                           | 0.338                            | 2655.78             | 897.07              | 0.061                            | 2002.14             | 121.86              |
| A_68_P31771008 | chr18:63851869-63851913                           | NM_016792:123     | Txn11      | INSIDE                 | 0.500                                           | 0.624                            | 967.36              | 604.02              | 0.312                            | 795.19              | 248.03              |
| A_68_P26157753 | chr8:112089724-112089768                          | NM_175646:-139    | Txn14b     | DIVERGENT_PROMOTER     | 0.442                                           | 0.496                            | 1241.52             | 615.33              | 0.219                            | 986.23              | 215.99              |
| A_68_P27294064 | chr10:82321765-82321809                           | NM_001042513:-164 | Txnrd1     | PROMOTER               | 0.407                                           | 0.407                            | 1520.91             | 618.76              | 0.166                            | 1187.54             | 196.62              |
| A_68_P27294068 | chr10:82322231-82322275                           | NM_001042514:-833 | Txnrd1     | PROMOTER               | 0.455                                           | 0.527                            | 1103.64             | 581.49              | 0.240                            | 897.92              | 215.07              |
| A_68_P30579666 | chr16:18426377-18426421                           | NM_013711:-111    | Txnrd2     | PROMOTER               | 0.223                                           | 0.561                            | 1220.57             | 684.81              | 0.125                            | 1009.17             | 126.49              |
| A_68_P24629441 | chr6:89594015-89594059                            | NM_001178058:55   | Txnrd3     | INSIDE                 | 0.248                                           | 0.656                            | 1009.04             | 662.17              | 0.163                            | 805.31              | 131.26              |
| A_68_P24629444 | chr6:89594337-89594382                            | NM_001178058:378  | Txnrd3     | INSIDE                 | 0.323                                           | 0.633                            | 850.49              | 538.49              | 0.205                            | 606.75              | 124.15              |
| A_68_P26345603 | chr9:20935690-20935734                            | NM_001205312:7    | Tyk2       | INSIDE                 | 0.522                                           | 0.447                            | 1299.32             | 581.22              | 0.234                            | 950.51              | 222.05              |
| A_68_P26345605 | chr9:20935853-20935897                            | NM_001205312:-155 | Tyk2       | PROMOTER               | 0.215                                           | 0.430                            | 1723.99             | 740.76              | 0.092                            | 1306.52             | 120.43              |
| A_68_P26345606 | chr9:20935934-20935978                            | NM_001205312:-237 | Tyk2       | PROMOTER               | 0.183                                           | 0.523                            | 2169.75             | 1135.59             | 0.096                            | 1687.23             | 161.85              |
| A_68_P27181839 | chr10:61158255-61158299                           | NM_027912:15      | Tysnd1     | INSIDE                 | 0.421                                           | 0.715                            | 1529.10             | 1092.85             | 0.301                            | 1262.60             | 380.16              |
| A_68_P27181840 | chr10:61158435-61158479                           | NM_027912:195     | Tysnd1     | INSIDE                 | 0.539                                           | 0.559                            | 1478.70             | 826.44              | 0.301                            | 1225.02             | 369.29              |
| A_68_P31962486 | chr19:12869204-12869248                           | NR_024093:1387    | U05342     | INSIDE                 | 0.505                                           | 0.456                            | 2112.45             | 964.22              | 0.230                            | 1734.61             | 399.72              |
| A_68_P31962498 | chr19:12870780-12870828                           | NR_024093:-191    | U05342     | DIVERGENT_PROMOTER     | 0.145                                           | 0.672                            | 1627.79             | 1093.84             | 0.098                            | 1213.82             | 118.51              |
| A_68_P31962499 | chr19:12870892-12870947                           | NR_024093:-306    | U05342     | DIVERGENT_PROMOTER     | 0.221                                           | 0.665                            | 1256.85             | 835.66              | 0.147                            | 878.84              | 129.33              |
| A_68_P24951860 | chr7:5012759-5012803                              | NM_001205231:-964 | U2af2      | PROMOTER               | 0.035                                           | 1.731                            | 3897.00             | 6746.08             | 0.061                            | 2578.09             | 157.88              |
| A_68_P24951861 | chr7:5012862-5012906                              | NM_001205231:-860 | U2af2      | PROMOTER               | 0.050                                           | 1.386                            | 5584.12             | 7737.96             | 0.069                            | 3565.50             | 246.70              |
| A_68_P24951866 | chr7:5013371-5013415                              | NM_001205231:-352 | U2af2      | PROMOTER               | 0.511                                           | 0.525                            | 1150.93             | 604.71              | 0.268                            | 918.34              | 246.56              |
| A_68_P24951867 | chr7:5013463-5013510                              | NM_001205231:-258 | U2af2      | PROMOTER               | 0.204                                           | 0.628                            | 1088.31             | 683.19              | 0.128                            | 913.11              | 117.03              |
| A_68_P20820926 | chr1:172105452-172105507                          | NM_133806:-402    | Uap1       | PROMOTER               | 0.205                                           | 0.535                            | 1269.42             | 679.15              | 0.110                            | 1086.78             | 119.01              |
| A_68_P25952345 | chr8:73033987-73034031                            | NM_019883:258     | Uba52      | INSIDE                 | 0.531                                           | 0.523                            | 1817.14             | 951.17              | 0.278                            | 1421.48             | 395.29              |
| A_68_P23862543 | chr5:86601868-86601912                            | NM_172712:-122    | Uba6       | PROMOTER               | 0.398                                           | 0.692                            | 2387.01             | 1652.51             | 0.275                            | 1949.46             | 536.57              |
| A_68_P21075774 | chr2:25877393-25877437                            | NM_133835:-134    | Ubac1      | PROMOTER               | 0.473                                           | 0.587                            | 929.27              | 545.17              | 0.277                            | 735.12              | 203.83              |
| A_68_P26447519 | chr9:40964965-40965009                            | NM_176860:591     | Ubash3b    | INSIDE                 | 0.344                                           | 0.430                            | 1488.87             | 640.59              | 0.148                            | 1269.45             | 188.16              |
| A_68_P26447525 | chr9:40965613-40965657                            | NM_176860:-57     | Ubash3b    | PROMOTER               | 0.615                                           | 0.411                            | 1287.73             | 529.80              | 0.253                            | 1161.68             | 293.92              |

| ProbeName      | Target position of probe on CpG island microarray | TargetID          | GeneSymbol | CpG island Description | Ratio of relative methylation (TiO2-NP/Vehicle) | Sham group                       |                     |                     | TiO <sub>2</sub> -H group        |                     |                     |
|----------------|---------------------------------------------------|-------------------|------------|------------------------|-------------------------------------------------|----------------------------------|---------------------|---------------------|----------------------------------|---------------------|---------------------|
|                |                                                   |                   |            |                        |                                                 | Relative methylation (Cy-5/Cy-3) | Cy-3 signal (Input) | Cy-5 signal (MeDIP) | Relative methylation (Cy-5/Cy-3) | Cy-3 signal (Input) | Cy-5 signal (MeDIP) |
| A_68_P27854524 | chr11:62364466-62364510                           | NM_011664:-517    | Ubb        | PROMOTER               | 0.556                                           | 0.626                            | 3728.27             | 2333.43             | 0.348                            | 2821.54             | 981.17              |
| A_68_P27854525 | chr11:62364572-62364616                           | NM_011664:-411    | Ubb        | PROMOTER               | 0.247                                           | 0.331                            | 1984.84             | 657.46              | 0.082                            | 1445.63             | 118.38              |
| A_68_P27854526 | chr11:62364648-62364692                           | NM_011664:-335    | Ubb        | PROMOTER               | 0.206                                           | 0.344                            | 2463.59             | 847.60              | 0.071                            | 1806.92             | 128.23              |
| A_68_P24066623 | chr5:125869716-125869760                          | NM_019639:649     | Ubc        | INSIDE                 | 0.134                                           | 0.634                            | 6152.72             | 3902.70             | 0.085                            | 4499.47             | 382.72              |
| A_68_P24066628 | chr5:125870372-125870416                          | NM_019639:-7      | Ubc        | PROMOTER               | 0.427                                           | 0.549                            | 1991.27             | 1093.22             | 0.234                            | 1505.86             | 352.80              |
| A_68_P32320542 | chrX:34414678-34414722                            | NM_019668:340     | Ube2a      | INSIDE                 | 0.172                                           | 1.843                            | 976.13              | 1798.99             | 0.317                            | 387.01              | 122.84              |
| A_68_P27796900 | chr11:51813767-51813811                           | NM_009458:180     | Ube2b      | INSIDE                 | 0.289                                           | 0.391                            | 1321.77             | 517.13              | 0.113                            | 1046.13             | 118.28              |
| A_68_P21819632 | chr2:164595210-164595259                          | NM_026785:-194    | Ube2c      | PROMOTER               | 0.192                                           | 0.507                            | 1812.01             | 919.57              | 0.098                            | 1389.77             | 135.69              |
| A_68_P27234634 | chr10:70747646-70747690                           | NM_145420:342     | Ube2d1     | INSIDE                 | 0.376                                           | 0.444                            | 1934.49             | 859.07              | 0.167                            | 1590.62             | 265.77              |
| A_68_P22552061 | chr3:135101698-135101742                          | NM_025356:-2      | Ube2d3     | DIVERGENT_PROMOTER     | 0.446                                           | 0.590                            | 1701.83             | 1003.69             | 0.263                            | 1466.57             | 385.37              |
| A_68_P22552063 | chr3:135102173-135102217                          | NM_025356:472     | Ube2d3     | INSIDE                 | 0.368                                           | 0.625                            | 1947.42             | 1216.38             | 0.230                            | 1437.53             | 330.82              |
| A_68_P29438120 | chr14:19159804-19159848                           | NM_009455:4532    | Ube2e1     | INSIDE                 | 0.499                                           | 1.438                            | 13529.53            | 19455.29            | 0.718                            | 9696.69             | 6961.56             |
| A_68_P29440562 | chr14:19726350-19726394                           | NM_144839:-231    | Ube2e2     | PROMOTER               | 0.345                                           | 0.574                            | 1097.38             | 629.74              | 0.198                            | 820.14              | 162.60              |
| A_68_P29440563 | chr14:19726488-19726532                           | NM_144839:-369    | Ube2e2     | PROMOTER               | 0.092                                           | 2.790                            | 14911.27            | 41604.55            | 0.257                            | 9652.93             | 2478.26             |
| A_68_P27269296 | chr10:77085151-77085195                           | NM_019803:107     | Ube2g2     | INSIDE                 | 0.307                                           | 0.484                            | 1202.52             | 581.61              | 0.149                            | 974.75              | 144.97              |
| A_68_P24331348 | chr6:30254521-30254565                            | NM_001169576:-3   | Ube2h      | PROMOTER               | 0.250                                           | 0.632                            | 978.60              | 618.42              | 0.158                            | 768.99              | 121.58              |
| A_68_P24974288 | chr7:13622741-13622791                            | NM_145578:561     | Ube2m      | INSIDE                 | 0.587                                           | 3.217                            | 3408.62             | 10964.70            | 1.887                            | 2139.26             | 4036.39             |
| A_68_P24974296 | chr7:13623790-13623834                            | NM_001168469:-193 | Ube2m      | PROMOTER               | 0.236                                           | 0.505                            | 1239.19             | 625.40              | 0.119                            | 1003.09             | 119.35              |
| A_68_P24974297 | chr7:13623923-13623967                            | NM_001168469:-325 | Ube2m      | PROMOTER               | 0.296                                           | 0.616                            | 967.88              | 596.50              | 0.182                            | 764.16              | 139.33              |
| A_68_P27365510 | chr10:94977758-94977802                           | NM_080560:-15     | Ube2n      | PROMOTER               | 0.544                                           | 0.448                            | 1157.40             | 518.61              | 0.244                            | 935.78              | 228.11              |
| A_68_P28160204 | chr11:116442979-116443023                         | NM_173755:-239    | Ube2o      | PROMOTER               | 0.346                                           | 0.696                            | 1128.49             | 785.63              | 0.241                            | 927.90              | 223.53              |
| A_68_P29117520 | chr13:69878183-69878227                           | NM_001145162:571  | Ube2ql1    | INSIDE                 | 0.388                                           | 0.642                            | 1526.90             | 979.63              | 0.249                            | 1303.06             | 324.09              |
| A_68_P24950633 | chr7:4763653-4763698                              | NM_133777:267     | Ube2s      | INSIDE                 | 0.320                                           | 0.696                            | 2552.57             | 1776.55             | 0.223                            | 1803.54             | 401.60              |
| A_68_P24950639 | chr7:4764364-4764408                              | NM_133777:-444    | Ube2s      | PROMOTER               | 0.366                                           | 1.628                            | 13007.66            | 21180.35            | 0.597                            | 8763.23             | 5227.49             |
| A_68_P20636517 | chr11:136859020-136859067                         | NM_026024:-110    | Ube2t      | DIVERGENT_PROMOTER     | 0.423                                           | 0.447                            | 1648.84             | 736.46              | 0.189                            | 1452.07             | 274.19              |
| A_68_P20636519 | chr11:136859233-136859277                         | NM_026024:101     | Ube2t      | INSIDE                 | 0.412                                           | 0.519                            | 1782.14             | 924.96              | 0.214                            | 1524.67             | 325.64              |
| A_68_P21836562 | chr2:167456829-167456873                          | NM_023230:655     | Ube2v1     | INSIDE                 | 0.369                                           | 0.640                            | 7254.47             | 4646.42             | 0.236                            | 5275.91             | 1247.68             |
| A_68_P25158144 | chr7:66483973-66484017                            | NM_173010:-125    | Ube3a      | PROMOTER               | 0.348                                           | 0.462                            | 1876.60             | 866.42              | 0.161                            | 1602.23             | 257.60              |
| A_68_P25158152 | chr7:66484943-66484987                            | NM_001033962:843  | Ube3a      | INSIDE                 | 0.256                                           | 0.485                            | 1627.14             | 789.31              | 0.124                            | 1358.78             | 168.87              |
| A_68_P24003597 | chr5:114830959-114831004                          | NM_054093:366     | Ube3b      | INSIDE                 | 0.411                                           | 0.529                            | 4098.81             | 2167.91             | 0.218                            | 3145.46             | 684.31              |
| A_68_P26470628 | chr9:44773616-44773660                            | NM_145400:45      | Ube4a      | INSIDE                 | 0.279                                           | 0.615                            | 1197.04             | 736.45              | 0.172                            | 834.72              | 143.46              |
| A_68_P23400515 | chr4:148800617-148800661                          | NM_022022:102     | Ube4b      | INSIDE                 | 0.122                                           | 0.452                            | 3107.56             | 1405.64             | 0.055                            | 2084.13             | 114.58              |
| A_68_P23400518 | chr4:148800981-148801025                          | NM_022022:-262    | Ube4b      | PROMOTER               | 0.453                                           | 0.412                            | 1376.42             | 567.31              | 0.187                            | 1115.89             | 208.26              |
| A_68_P23394410 | chr4:147818444-147818488                          | NM_027873:394     | Ubiad1     | INSIDE                 | 0.594                                           | 0.710                            | 1967.05             | 1395.74             | 0.421                            | 1672.34             | 704.34              |
| A_68_P22314484 | chr3:88358116-88358160                            | NM_033526:501     | Ubqln4     | INSIDE                 | 0.137                                           | 0.544                            | 2132.16             | 1160.56             | 0.074                            | 1560.54             | 115.96              |
| A_68_P31210122 | chr17:47147092-47147136                           | NM_001177374:367  | Ubr2       | INSIDE                 | 0.198                                           | 0.375                            | 2160.65             | 809.81              | 0.074                            | 1648.66             | 122.20              |
| A_68_P31210125 | chr17:47147460-47147504                           | NM_001177374:-1   | Ubr2       | PROMOTER               | 0.340                                           | 0.467                            | 1693.61             | 790.74              | 0.159                            | 1214.67             | 192.81              |
| A_68_P21311590 | chr2:69735990-69736034                            | NM_001081548:710  | Ubr3       | INSIDE                 | 0.359                                           | 1.511                            | 6847.83             | 10349.14            | 0.543                            | 5104.77             | 2769.63             |
| A_68_P30147669 | chr15:38007832-38007883                           | NM_001081359:751  | Ubr5       | INSIDE                 | 0.239                                           | 0.477                            | 1329.57             | 633.72              | 0.114                            | 1067.81             | 121.71              |
| A_68_P30147677 | chr15:38008870-38008917                           | NM_001081359:-285 | Ubr5       | PROMOTER               | 0.194                                           | 0.582                            | 1400.60             | 815.45              | 0.113                            | 1131.24             | 127.50              |
| A_68_P32118291 | chr19:42056116-42056160                           | NM_145500:-114    | Ubd1       | DIVERGENT_PROMOTER     | 0.438                                           | 0.640                            | 2745.78             | 1757.67             | 0.281                            | 2175.59             | 610.50              |
| A_68_P32118296 | chr19:42056888-42056932                           | NM_145500:658     | Ubd1       | INSIDE                 | 0.209                                           | 0.569                            | 1433.39             | 815.35              | 0.119                            | 1000.59             | 118.92              |
| A_68_P27688940 | chr11:32354802-32354846                           | NM_173784:-547    | Ubd2       | PROMOTER               | 0.126                                           | 0.492                            | 2761.76             | 1358.95             | 0.062                            | 1967.27             | 122.45              |
| A_68_P27688949 | chr11:32355960-32356004                           | NM_173784:611     | Ubd2       | INSIDE                 | 0.422                                           | 0.650                            | 2519.59             | 1637.60             | 0.274                            | 1965.94             | 539.05              |



| ProbeName      | Target position of probe on CpG island microarray | TargetID          | GeneSymbol | CpG island Description | Ratio of relative methylation (TiO2-NP/Vehicle) | Sham group                       |                     |                     | TiO <sub>2</sub> -H group        |                     |                     |
|----------------|---------------------------------------------------|-------------------|------------|------------------------|-------------------------------------------------|----------------------------------|---------------------|---------------------|----------------------------------|---------------------|---------------------|
|                |                                                   |                   |            |                        |                                                 | Relative methylation (Cy-5/Cy-3) | Cy-3 signal (Input) | Cy-5 signal (MeDIP) | Relative methylation (Cy-5/Cy-3) | Cy-3 signal (Input) | Cy-5 signal (MeDIP) |
| A_68_P28078911 | chr11:102180801-102180845                         | NM_011551:-412    | Ubtf       | PROMOTER               | 0.446                                           | 0.652                            | 1379.17             | 898.69              | 0.291                            | 1087.62             | 316.34              |
| A_68_P28078915 | chr11:102181318-102181368                         | NM_011551:-932    | Ubtf       | PROMOTER               | 0.099                                           | 1.396                            | 1276.09             | 1781.33             | 0.139                            | 869.46              | 120.73              |
| A_68_P22704455 | chr4:6118180-6118224                              | NM_026534:-49     | Ubxn2b     | PROMOTER               | 0.407                                           | 0.671                            | 1912.76             | 1284.31             | 0.274                            | 1666.37             | 455.81              |
| A_68_P20599491 | chr1:130140934-130140978                          | NM_026390:199     | Ubxn4      | INSIDE                 | 0.522                                           | 0.677                            | 2087.79             | 1413.90             | 0.353                            | 1703.00             | 601.59              |
| A_68_P20599492 | chr1:130141015-130141059                          | NM_026390:279     | Ubxn4      | INSIDE                 | 0.459                                           | 0.650                            | 4640.72             | 3016.78             | 0.299                            | 3399.53             | 1014.81             |
| A_68_P20599496 | chr1:130141494-130141539                          | NM_026390:759     | Ubxn4      | INSIDE                 | 0.351                                           | 0.521                            | 1427.11             | 743.99              | 0.183                            | 1232.59             | 225.43              |
| A_68_P30651942 | chr16:32332504-32332548                           | NM_177633:189     | Ubxn7      | INSIDE                 | 0.220                                           | 0.435                            | 1879.98             | 816.89              | 0.096                            | 1483.41             | 141.93              |
| A_68_P25769987 | chr8:34752626-34752684                            | NM_178648:-206    | Ubxn8      | PROMOTER               | 0.250                                           | 0.593                            | 977.36              | 580.01              | 0.148                            | 796.30              | 117.94              |
| A_68_P29856116 | chr14:102053116-102053160                         | NM_016723:-45     | Uchl3      | PROMOTER               | 0.477                                           | 0.678                            | 1252.29             | 848.85              | 0.323                            | 1035.20             | 334.63              |
| A_68_P20680089 | chr1:145624837-145624881                          | NM_001159866:451  | Uchl5      | INSIDE                 | 0.199                                           | 0.635                            | 1275.72             | 810.46              | 0.126                            | 960.30              | 121.29              |
| A_68_P20827191 | chr1:173224816-173224860                          | NM_025388:275     | Ufc1       | INSIDE                 | 0.642                                           | 0.613                            | 2240.32             | 1372.98             | 0.394                            | 1628.28             | 641.14              |
| A_68_P24124995 | chr5:137735672-137735716                          | NM_027356:-202    | Ufsp1      | PROMOTER               | 0.340                                           | 1.516                            | 984.83              | 1492.78             | 0.515                            | 738.67              | 380.39              |
| A_68_P22955051 | chr4:59202692-59202736                            | NM_011673:293     | Ugcg       | INSIDE                 | 0.545                                           | 0.563                            | 1620.86             | 912.76              | 0.307                            | 1262.37             | 387.28              |
| A_68_P22955052 | chr4:59202854-59202909                            | NM_011673:460     | Ugcg       | INSIDE                 | 0.191                                           | 0.493                            | 2628.45             | 1296.85             | 0.094                            | 1261.71             | 119.09              |
| A_68_P23756354 | chr5:65826840-65826884                            | NM_009466:219     | Ugdh       | INSIDE                 | 0.329                                           | 0.477                            | 1619.17             | 772.85              | 0.157                            | 1266.07             | 199.08              |
| A_68_P23756359 | chr5:65827367-65827411                            | NM_009466:-307    | Ugdh       | PROMOTER               | 0.415                                           | 0.455                            | 1287.76             | 586.48              | 0.189                            | 1071.15             | 202.44              |
| A_68_P27636579 | chr11:21270946-21270990                           | NM_139297:-86     | Ugp2       | PROMOTER               | 0.413                                           | 0.627                            | 3347.53             | 2100.29             | 0.259                            | 2781.75             | 720.34              |
| A_68_P27636581 | chr11:21271108-21271152                           | NM_139297:-248    | Ugp2       | PROMOTER               | 0.658                                           | 0.547                            | 1452.35             | 794.69              | 0.360                            | 1201.24             | 432.29              |
| A_68_P22500445 | chr3:125641287-125641331                          | NM_011674:160     | Ugt8a      | INSIDE                 | 0.336                                           | 0.490                            | 3569.56             | 1747.63             | 0.164                            | 2752.41             | 452.21              |
| A_68_P31255135 | chr17:56442788-56442838                           | NM_001111078:-923 | Uhrf1      | PROMOTER               | 0.223                                           | 0.671                            | 1245.67             | 835.51              | 0.150                            | 764.21              | 114.41              |
| A_68_P31255137 | chr17:56443079-56443123                           | NM_001111078:-635 | Uhrf1      | PROMOTER               | 0.531                                           | 0.361                            | 2256.96             | 815.72              | 0.192                            | 1682.86             | 323.24              |
| A_68_P31255140 | chr17:56443504-56443548                           | NM_001111078:-209 | Uhrf1      | PROMOTER               | 0.179                                           | 0.492                            | 2188.59             | 1076.76             | 0.088                            | 1546.69             | 136.25              |
| A_68_P31118858 | chr17:27993704-27993749                           | NM_001080769:275  | Uhrf1bp1   | INSIDE                 | 0.230                                           | 0.517                            | 1782.60             | 921.56              | 0.119                            | 1305.18             | 155.06              |
| A_68_P31118859 | chr17:27993828-27993872                           | NM_001080769:399  | Uhrf1bp1   | INSIDE                 | 0.203                                           | 0.657                            | 3498.82             | 2298.77             | 0.133                            | 2559.01             | 340.95              |
| A_68_P27332827 | chr10:89208343-89208387                           | NM_029166:629     | Uhrf1bp11  | INSIDE                 | 0.517                                           | 0.602                            | 2053.76             | 1236.54             | 0.311                            | 1498.78             | 466.31              |
| A_68_P27332828 | chr10:89208416-89208468                           | NM_029166:707     | Uhrf1bp11  | INSIDE                 | 0.232                                           | 0.575                            | 1160.00             | 667.26              | 0.133                            | 881.77              | 117.45              |
| A_68_P27850821 | chr11:61668019-61668063                           | NM_013881:554     | Ulk2       | INSIDE                 | 0.469                                           | 0.615                            | 921.91              | 566.85              | 0.289                            | 894.06              | 258.08              |
| A_68_P26882495 | chr9:121186443-121186487                          | NM_177589:-174    | Ulk4       | PROMOTER               | 0.302                                           | 0.724                            | 1738.14             | 1258.88             | 0.219                            | 1360.39             | 297.54              |
| A_68_P30660864 | chr16:33966979-33967023                           | NM_009471:89      | Umps       | INSIDE                 | 0.400                                           | 0.552                            | 1618.29             | 893.67              | 0.221                            | 1283.96             | 283.85              |
| A_68_P30660865 | chr16:33967049-33967093                           | NM_009471:19      | Umps       | INSIDE                 | 0.206                                           | 0.507                            | 2569.49             | 1301.49             | 0.104                            | 2231.05             | 232.45              |
| A_68_P27942765 | chr11:78157408-78157455                           | NM_011676:408     | Unc119     | INSIDE                 | 0.135                                           | 0.599                            | 1847.99             | 1106.68             | 0.081                            | 1445.23             | 116.78              |
| A_68_P24007965 | chr5:115577169-115577225                          | NM_175352:7788    | Unc119b    | INSIDE                 | 0.627                                           | 3.482                            | 399.10              | 1389.78             | 2.182                            | 342.83              | 748.07              |
| A_68_P24007966 | chr5:115577255-115577310                          | NM_175352:7702    | Unc119b    | INSIDE                 | 0.649                                           | 5.250                            | 1870.32             | 9818.65             | 3.406                            | 1256.12             | 4278.53             |
| A_68_P25958199 | chr8:74194916-74194960                            | NM_001029873:718  | Unc13a     | INSIDE                 | 0.198                                           | 0.511                            | 3020.20             | 1544.04             | 0.101                            | 2116.64             | 214.29              |
| A_68_P25958201 | chr8:74195222-74195266                            | NM_001029873:412  | Unc13a     | INSIDE                 | 0.385                                           | 0.429                            | 1736.62             | 744.39              | 0.165                            | 1310.45             | 216.39              |
| A_68_P22869764 | chr4:43071791-43071835                            | NM_001081413:-43  | Unc13b     | PROMOTER               | 0.404                                           | 0.501                            | 1272.86             | 637.85              | 0.202                            | 1133.30             | 229.43              |
| A_68_P29052391 | chr13:55057276-55057320                           | NM_153131:6506    | Unc5a      | INSIDE                 | 0.248                                           | 0.494                            | 1243.66             | 614.83              | 0.123                            | 944.51              | 115.98              |
| A_68_P22584284 | chr3:141128445-141128489                          | NM_009472:-61     | Unc5c      | PROMOTER               | 0.370                                           | 0.575                            | 2698.73             | 1551.80             | 0.213                            | 2117.13             | 450.32              |
| A_68_P25747454 | chr8:30329630-30329674                            | NM_153135:456     | Unc5d      | INSIDE                 | 0.114                                           | 0.658                            | 2688.28             | 1768.87             | 0.075                            | 1939.09             | 145.04              |
| A_68_P28694453 | chr12:104187317-104187361                         | NM_001081017:270  | Unc79      | INSIDE                 | 0.135                                           | 0.658                            | 1775.46             | 1169.04             | 0.089                            | 1317.48             | 116.97              |
| A_68_P28694455 | chr12:104187509-104187553                         | NM_001081017:462  | Unc79      | INSIDE                 | 0.477                                           | 0.648                            | 1703.01             | 1103.15             | 0.309                            | 1328.01             | 409.98              |
| A_68_P28694456 | chr12:104187580-104187626                         | NM_001081017:534  | Unc79      | INSIDE                 | 0.292                                           | 0.413                            | 1388.25             | 573.76              | 0.121                            | 1017.38             | 122.81              |
| A_68_P20302824 | chr1:66515076-66515120                            | NM_175510:78      | Unc80      | INSIDE                 | 0.537                                           | 0.442                            | 2680.25             | 1183.87             | 0.237                            | 2131.57             | 505.42              |
| A_68_P24136132 | chr5:140016559-140016603                          | NM_013702:-3271   | Unex       | PROMOTER               | 0.543                                           | 0.700                            | 2479.04             | 1736.39             | 0.381                            | 1900.50             | 723.36              |

| ProbeName      | Target position of probe on CpG island microarray | TargetID          | GeneSymbol | CpG island Description | Ratio of relative methylation (TiO2-NP/Vehicle) | Sham group                       |                     |                     | TiO <sub>2</sub> -H group        |                     |                     |
|----------------|---------------------------------------------------|-------------------|------------|------------------------|-------------------------------------------------|----------------------------------|---------------------|---------------------|----------------------------------|---------------------|---------------------|
|                |                                                   |                   |            |                        |                                                 | Relative methylation (Cy-5/Cy-3) | Cy-3 signal (Input) | Cy-5 signal (MeDIP) | Relative methylation (Cy-5/Cy-3) | Cy-3 signal (Input) | Cy-5 signal (MeDIP) |
| A_68_P24136133 | chr5:140016708-140016752                          | NM_013702:-3121   | Unex       | PROMOTER               | 0.230                                           | 0.701                            | 1942.94             | 1362.01             | 0.161                            | 1361.68             | 219.39              |
| A_68_P24136136 | chr5:140017148-140017192                          | NM_013702:-2681   | Unex       | PROMOTER               | 0.205                                           | 0.410                            | 1855.71             | 761.57              | 0.084                            | 1437.44             | 121.11              |
| A_68_P24136159 | chr5:140020492-140020536                          | NM_013702:663     | Unex       | INSIDE                 | 0.554                                           | 0.493                            | 1501.07             | 740.30              | 0.273                            | 1128.42             | 308.57              |
| A_68_P24136178 | chr5:140022739-140022790                          | NM_013702:2913    | Unex       | INSIDE                 | 0.143                                           | 0.547                            | 1889.50             | 1033.10             | 0.078                            | 1509.11             | 118.01              |
| A_68_P24136182 | chr5:140023230-140023274                          | NM_013702:3401    | Unex       | INSIDE                 | 0.664                                           | 0.389                            | 1861.09             | 723.76              | 0.258                            | 1418.20             | 366.30              |
| A_68_P24136194 | chr5:140024878-140024927                          | NM_013702:5051    | Unex       | DOWNSTREAM             | 0.263                                           | 0.366                            | 1679.94             | 615.64              | 0.096                            | 1316.56             | 126.70              |
| A_68_P24002090 | chr5:114580992-114581036                          | NM_011677:-150    | Ung        | PROMOTER               | 0.203                                           | 0.552                            | 1463.58             | 808.59              | 0.112                            | 1104.62             | 123.89              |
| A_68_P24002094 | chr5:114581485-114581529                          | NM_011677:342     | Ung        | INSIDE                 | 0.562                                           | 0.697                            | 2466.04             | 1718.55             | 0.391                            | 1766.12             | 691.36              |
| A_68_P24002095 | chr5:114581570-114581614                          | NM_011677:428     | Ung        | INSIDE                 | 0.452                                           | 0.669                            | 1632.59             | 1092.65             | 0.303                            | 1191.18             | 360.56              |
| A_68_P31102171 | chr17:25325763-25325807                           | NM_001197024:440  | Unkl       | INSIDE                 | 0.626                                           | 0.446                            | 1153.78             | 514.61              | 0.279                            | 1027.76             | 287.03              |
| A_68_P31102173 | chr17:25325952-25325996                           | NM_001197024:630  | Unkl       | INSIDE                 | 0.448                                           | 1.411                            | 4361.39             | 6154.12             | 0.632                            | 2988.51             | 1887.80             |
| A_68_P31102174 | chr17:25326044-25326091                           | NM_001197024:723  | Unkl       | INSIDE                 | 0.287                                           | 2.199                            | 2892.25             | 6361.48             | 0.630                            | 1885.87             | 1188.62             |
| A_68_P20976549 | chr2:5872087-5872131                              | NM_001081132:-406 | Upf2       | DIVERGENT_PROMOTER     | 0.412                                           | 0.537                            | 2244.35             | 1204.12             | 0.221                            | 1687.54             | 373.12              |
| A_68_P25670550 | chr8:13785336-13785380                            | NM_025924:-256    | Upf3a      | PROMOTER               | 0.164                                           | 0.418                            | 2270.42             | 949.67              | 0.069                            | 1798.70             | 123.76              |
| A_68_P25670556 | chr8:13785998-13786042                            | NM_025924:406     | Upf3a      | INSIDE                 | 0.431                                           | 0.710                            | 2540.02             | 1802.82             | 0.306                            | 1946.37             | 595.74              |
| A_68_P32321786 | chrX:34650071-34650115                            | NM_026573:225     | Upf3b      | INSIDE                 | 0.338                                           | 1.475                            | 1569.57             | 2315.84             | 0.499                            | 628.25              | 313.59              |
| A_68_P21768465 | chr2:155755929-155755973                          | NM_018888:96      | Uqec       | INSIDE                 | 0.300                                           | 0.548                            | 2307.00             | 1265.32             | 0.164                            | 1686.87             | 277.31              |
| A_68_P26817223 | chr9:108838835-108838879                          | NM_025407:196     | Uqerc1     | INSIDE                 | 0.378                                           | 0.569                            | 3102.80             | 1764.39             | 0.215                            | 2284.53             | 491.08              |
| A_68_P26817225 | chr9:108838988-108839032                          | NM_025407:350     | Uqerc1     | INSIDE                 | 0.251                                           | 0.665                            | 1543.53             | 1026.21             | 0.167                            | 1080.27             | 180.40              |
| A_68_P25469455 | chr7:127778730-127778774                          | NM_025899:50      | Uqerc2     | INSIDE                 | 0.600                                           | 0.556                            | 1663.72             | 924.96              | 0.333                            | 1301.62             | 433.87              |
| A_68_P25469458 | chr7:127779197-127779246                          | NM_025899:519     | Uqerc2     | INSIDE                 | 0.274                                           | 0.480                            | 1509.41             | 723.99              | 0.131                            | 1071.55             | 140.69              |
| A_68_P27804721 | chr11:53244209-53244253                           | NM_025352:103     | Uqercq     | INSIDE                 | 0.656                                           | 0.376                            | 1433.16             | 539.11              | 0.247                            | 1209.03             | 298.46              |
| A_68_P27804727 | chr11:53244769-53244814                           | NM_025352:-458    | Uqercq     | DIVERGENT_PROMOTER     | 0.136                                           | 0.472                            | 2385.36             | 1124.72             | 0.064                            | 1820.09             | 117.07              |
| A_68_P30959118 | chr16:90810399-90810443                           | NM_029497:238     | Urb1       | INSIDE                 | 0.567                                           | 0.716                            | 1794.66             | 1285.74             | 0.406                            | 1464.42             | 594.60              |
| A_68_P30959121 | chr16:90810687-90810731                           | NM_029497:-50     | Urb1       | PROMOTER               | 0.085                                           | 0.749                            | 5604.64             | 4196.73             | 0.064                            | 3815.21             | 243.76              |
| A_68_P27564839 | chr11:5662438-5662482                             | NM_001077661:-81  | Urgcp      | PROMOTER               | 0.291                                           | 0.643                            | 1337.79             | 860.34              | 0.187                            | 1214.75             | 227.24              |
| A_68_P21099685 | chr2:29682982-29683026                            | NM_026615:96      | Urm1       | INSIDE                 | 0.241                                           | 0.515                            | 1175.62             | 605.07              | 0.124                            | 967.59              | 119.94              |
| A_68_P25542187 | chr7:140900886-140900932                          | NM_009479:70      | Uros       | INSIDE                 | 0.374                                           | 0.654                            | 1344.15             | 878.77              | 0.244                            | 1112.54             | 271.69              |
| A_68_P25956520 | chr8:73891092-73891136                            | NM_025917:-1      | Use1       | PROMOTER               | 0.360                                           | 0.672                            | 1224.42             | 823.05              | 0.242                            | 876.07              | 212.00              |
| A_68_P20827836 | chr1:173341700-173341744                          | NM_009480:-89     | Usf1       | PROMOTER               | 0.387                                           | 0.638                            | 846.99              | 540.07              | 0.247                            | 766.48              | 189.14              |
| A_68_P25034254 | chr7:31741889-31741933                            | NM_011680:-88     | Usf2       | PROMOTER               | 0.521                                           | 0.456                            | 1801.66             | 821.91              | 0.238                            | 1564.91             | 372.27              |
| A_68_P25034259 | chr7:31742709-31742753                            | NM_011680:-908    | Usf2       | PROMOTER               | 0.150                                           | 0.626                            | 1646.18             | 1029.94             | 0.094                            | 1299.90             | 121.88              |
| A_68_P23141221 | chr4:98590064-98590123                            | NM_146144:-407    | Usp1       | PROMOTER               | 0.257                                           | 0.460                            | 1246.18             | 573.60              | 0.118                            | 1016.12             | 120.01              |
| A_68_P23141222 | chr4:98590182-98590226                            | NM_146144:-296    | Usp1       | PROMOTER               | 0.249                                           | 0.389                            | 2799.55             | 1088.64             | 0.097                            | 1963.66             | 190.30              |
| A_68_P32289745 | chrX:20281291-20281340                            | NM_145628:281     | Usp11      | INSIDE                 | 0.061                                           | 3.297                            | 1735.70             | 5722.13             | 0.202                            | 648.10              | 131.15              |
| A_68_P32289746 | chrX:20281381-20281426                            | NM_145628:369     | Usp11      | INSIDE                 | 0.120                                           | 4.915                            | 2187.48             | 10750.72            | 0.587                            | 841.62              | 494.36              |
| A_68_P32289747 | chrX:20281555-20281599                            | NM_145628:542     | Usp11      | INSIDE                 | 0.083                                           | 1.484                            | 3365.04             | 4992.15             | 0.123                            | 1300.83             | 159.74              |
| A_68_P32289749 | chrX:20281744-20281788                            | NM_145628:732     | Usp11      | INSIDE                 | 0.294                                           | 1.410                            | 2905.22             | 4097.29             | 0.415                            | 1322.34             | 549.07              |
| A_68_P22039930 | chr3:32716759-32716803                            | NM_001013024:233  | Usp13      | INSIDE                 | 0.369                                           | 0.588                            | 1373.60             | 807.09              | 0.217                            | 1076.73             | 233.35              |
| A_68_P31487964 | chr18:10029653-10029701                           | NM_001038589:471  | Usp14      | INSIDE                 | 0.079                                           | 1.842                            | 6195.31             | 11413.37            | 0.145                            | 4093.49             | 592.67              |
| A_68_P31487968 | chr18:10030044-10030088                           | NM_001038589:81   | Usp14      | INSIDE                 | 0.478                                           | 0.718                            | 2964.47             | 2127.98             | 0.343                            | 2212.20             | 758.69              |
| A_68_P27513158 | chr10:122634206-122634250                         | NM_027604:-249    | Usp15      | PROMOTER               | 0.306                                           | 0.705                            | 4044.48             | 2850.09             | 0.216                            | 3043.05             | 657.08              |
| A_68_P27513159 | chr10:122634312-122634356                         | NM_027604:-355    | Usp15      | PROMOTER               | 0.547                                           | 0.569                            | 1198.25             | 681.30              | 0.311                            | 905.95              | 281.84              |
| A_68_P30939796 | chr16:87455183-87455227                           | NM_024258:-25     | Usp16      | PROMOTER               | 0.365                                           | 0.514                            | 1171.02             | 601.72              | 0.188                            | 1168.48             | 219.09              |

| ProbeName      | Target position of probe on CpG island microarray | TargetID          | GeneSymbol | CpG island Description | Ratio of relative methylation (TiO2-NP/Vehicle) | Sham group                       |                     |                     | TiO <sub>2</sub> -H group        |                     |                     |
|----------------|---------------------------------------------------|-------------------|------------|------------------------|-------------------------------------------------|----------------------------------|---------------------|---------------------|----------------------------------|---------------------|---------------------|
|                |                                                   |                   |            |                        |                                                 | Relative methylation (Cy-5/Cy-3) | Cy-3 signal (Input) | Cy-5 signal (MeDIP) | Relative methylation (Cy-5/Cy-3) | Cy-3 signal (Input) | Cy-5 signal (MeDIP) |
| A_68_P32975183 | chr9:108393525-108393569                          | NM_027804:540     | Usp19      | INSIDE                 | 0.281                                           | 0.533                            | 1036.90             | 552.26              | 0.149                            | 786.82              | 117.61              |
| A_68_P32975184 | chr9:108393603-108393647                          | NM_027804:618     | Usp19      | INSIDE                 | 0.145                                           | 0.448                            | 2553.08             | 1142.68             | 0.065                            | 1982.21             | 128.47              |
| A_68_P21106327 | chr2:30837787-30837831                            | NM_028846:10      | Usp20      | INSIDE                 | 0.151                                           | 0.628                            | 1694.49             | 1063.48             | 0.095                            | 1276.90             | 120.83              |
| A_68_P27846980 | chr11:60988451-60988495                           | NM_001004143:89   | Usp22      | INSIDE                 | 0.096                                           | 0.605                            | 2922.75             | 1769.03             | 0.058                            | 2122.12             | 122.84              |
| A_68_P27846981 | chr11:60988586-60988630                           | NM_001004143:47   | Usp22      | PROMOTER               | 0.395                                           | 0.591                            | 3307.59             | 1953.18             | 0.233                            | 2575.10             | 600.24              |
| A_68_P27846982 | chr11:60988669-60988713                           | NM_001004143:-129 | Usp22      | PROMOTER               | 0.174                                           | 0.704                            | 1374.08             | 967.17              | 0.123                            | 978.49              | 119.89              |
| A_68_P23183545 | chr4:105988267-105988311                          | NM_183225:-529    | Usp24      | PROMOTER               | 0.232                                           | 1.519                            | 1236.60             | 1878.81             | 0.353                            | 961.88              | 339.71              |
| A_68_P30887980 | chr16:77014501-77014545                           | NM_013918:209     | Usp25      | INSIDE                 | 0.258                                           | 0.617                            | 1777.23             | 1096.07             | 0.159                            | 1478.42             | 235.57              |
| A_68_P26494988 | chr9:48793866-48793910                            | NM_175482:399     | Usp28      | INSIDE                 | 0.229                                           | 0.611                            | 2573.08             | 1571.55             | 0.140                            | 1976.90             | 276.95              |
| A_68_P26494989 | chr9:48793954-48794001                            | NM_175482:488     | Usp28      | INSIDE                 | 0.478                                           | 0.544                            | 958.06              | 521.24              | 0.260                            | 769.11              | 199.94              |
| A_68_P26593987 | chr9:66439772-66439816                            | NM_144937:993     | Usp3       | INSIDE                 | 0.666                                           | 0.520                            | 1052.45             | 547.37              | 0.347                            | 874.53              | 303.08              |
| A_68_P27981394 | chr11:84953213-84953257                           | NM_001029934:223  | Usp32      | INSIDE                 | 0.204                                           | 0.729                            | 5481.35             | 3997.05             | 0.149                            | 4000.64             | 594.10              |
| A_68_P27981396 | chr11:84953706-84953750                           | NM_001029934:-271 | Usp32      | PROMOTER               | 0.213                                           | 0.477                            | 1455.31             | 694.32              | 0.102                            | 1174.14             | 119.28              |
| A_68_P28170438 | chr11:118151273-118151317                         | NM_001033528:264  | Usp36      | INSIDE                 | 0.265                                           | 0.690                            | 2983.32             | 2058.58             | 0.183                            | 2067.49             | 377.70              |
| A_68_P28170440 | chr11:118151534-118151578                         | NM_001033528:2    | Usp36      | INSIDE                 | 0.235                                           | 0.345                            | 1889.19             | 652.00              | 0.081                            | 1482.46             | 120.12              |
| A_68_P26002691 | chr8:83538819-83538865                            | NM_027554:-37     | Usp38      | PROMOTER               | 0.115                                           | 0.544                            | 2694.02             | 1466.30             | 0.063                            | 2055.40             | 129.13              |
| A_68_P26814406 | chr9:108250276-108250320                          | NM_011678:137     | Usp4       | INSIDE                 | 0.566                                           | 0.419                            | 1705.18             | 714.12              | 0.237                            | 1419.62             | 336.31              |
| A_68_P26814408 | chr9:108250538-108250582                          | NM_011678:399     | Usp4       | INSIDE                 | 0.373                                           | 0.377                            | 1442.99             | 543.97              | 0.141                            | 1142.13             | 160.51              |
| A_68_P26814409 | chr9:108250644-108250688                          | NM_011678:505     | Usp4       | INSIDE                 | 0.287                                           | 0.698                            | 3306.90             | 2307.48             | 0.200                            | 2490.18             | 499.03              |
| A_68_P20421183 | chr1:89905073-89905117                            | NM_001033291:32   | Usp40      | INSIDE                 | 0.189                                           | 0.702                            | 3735.32             | 2620.52             | 0.133                            | 2823.27             | 374.41              |
| A_68_P27355935 | chr10:93296839-93296883                           | NM_183199:2561    | Usp44      | INSIDE                 | 0.317                                           | 0.467                            | 2048.29             | 957.04              | 0.148                            | 1560.01             | 231.12              |
| A_68_P27356012 | chr10:93309036-93309080                           | NM_183199:14759   | Usp44      | INSIDE                 | 0.655                                           | 3.048                            | 1192.22             | 3633.63             | 1.996                            | 1052.88             | 2101.65             |
| A_68_P22774764 | chr4:21703668-21703712                            | NM_152825:274     | Usp45      | INSIDE                 | 0.220                                           | 0.416                            | 1567.03             | 651.39              | 0.092                            | 1257.44             | 115.25              |
| A_68_P23340748 | chr4:137150166-137150210                          | NM_130879:85      | Usp48      | INSIDE                 | 0.230                                           | 0.638                            | 1200.76             | 765.53              | 0.147                            | 1080.33             | 158.73              |
| A_68_P23340749 | chr4:137150280-137150324                          | NM_130879:199     | Usp48      | INSIDE                 | 0.589                                           | 0.550                            | 1095.82             | 602.36              | 0.324                            | 964.16              | 312.11              |
| A_68_P24817207 | chr6:124779297-124779341                          | NM_013700:147     | Usp5       | INSIDE                 | 0.158                                           | 0.485                            | 2622.24             | 1273.09             | 0.077                            | 1796.26             | 137.57              |
| A_68_P24817209 | chr6:124779503-124779547                          | NM_013700:-59     | Usp5       | DIVERGENT_PROMOTER     | 0.302                                           | 0.503                            | 1165.94             | 586.78              | 0.152                            | 782.00              | 118.66              |
| A_68_P24817210 | chr6:124779618-124779662                          | NM_013700:-175    | Usp5       | DIVERGENT_PROMOTER     | 0.171                                           | 0.594                            | 2734.83             | 1623.20             | 0.102                            | 1951.57             | 198.61              |
| A_68_P22485523 | chr3:122686980-122687024                          | NM_133857:363     | Usp53      | INSIDE                 | 0.261                                           | 0.520                            | 1295.91             | 673.84              | 0.135                            | 1054.22             | 142.82              |
| A_68_P22485526 | chr3:122687380-122687424                          | NM_133857:-37     | Usp53      | PROMOTER               | 0.645                                           | 0.448                            | 3046.44             | 1364.61             | 0.289                            | 2356.61             | 680.60              |
| A_68_P22485530 | chr3:122687874-122687918                          | NM_133857:-537    | Usp53      | PROMOTER               | 0.192                                           | 0.674                            | 1165.29             | 785.53              | 0.129                            | 901.34              | 116.42              |
| A_68_P26924746 | chr10:8238018-8238062                             | NM_177387:583     | Ust        | INSIDE                 | 0.505                                           | 0.612                            | 1224.44             | 749.46              | 0.309                            | 964.32              | 297.83              |
| A_68_P26924749 | chr10:8238335-8238379                             | NM_177387:267     | Ust        | INSIDE                 | 0.419                                           | 0.480                            | 2967.43             | 1423.15             | 0.201                            | 2436.12             | 489.69              |
| A_68_P26924750 | chr10:8238430-8238474                             | NM_177387:171     | Ust        | INSIDE                 | 0.613                                           | 0.633                            | 1249.79             | 791.26              | 0.388                            | 1122.33             | 435.37              |
| A_68_P25581334 | chr7:147129626-147129670                          | NM_009482:-106    | Utrf1      | PROMOTER               | 0.363                                           | 0.470                            | 3752.43             | 1762.33             | 0.170                            | 2832.98             | 482.46              |
| A_68_P25581335 | chr7:147129738-147129782                          | NM_009482:6       | Utrf1      | INSIDE                 | 0.340                                           | 0.504                            | 2430.42             | 1224.45             | 0.171                            | 1909.32             | 326.69              |
| A_68_P25581338 | chr7:147130178-147130222                          | NM_009482:446     | Utrf1      | INSIDE                 | 0.508                                           | 0.603                            | 1427.31             | 861.20              | 0.306                            | 1137.09             | 348.46              |
| A_68_P25581339 | chr7:147130322-147130366                          | NM_009482:590     | Utrf1      | INSIDE                 | 0.212                                           | 0.737                            | 3285.27             | 2420.71             | 0.156                            | 2239.97             | 350.38              |
| A_68_P25581341 | chr7:147130605-147130649                          | NM_009482:872     | Utrf1      | INSIDE                 | 0.085                                           | 1.655                            | 11064.98            | 18312.08            | 0.141                            | 6853.57             | 967.55              |
| A_68_P23269743 | chr4:124370663-124370707                          | NM_026031:114     | Utp11l     | INSIDE                 | 0.312                                           | 0.637                            | 1271.91             | 810.07              | 0.198                            | 1062.86             | 210.87              |
| A_68_P32363625 | chrX:45609838-45609889                            | NM_028276:-247    | Utp14a     | PROMOTER               | 0.079                                           | 3.156                            | 1161.87             | 3666.93             | 0.248                            | 518.54              | 128.66              |
| A_68_P32363627 | chrX:45610039-45610084                            | NM_028276:-49     | Utp14a     | PROMOTER               | 0.536                                           | 0.539                            | 1200.53             | 647.27              | 0.289                            | 404.71              | 116.99              |
| A_68_P29256601 | chr13:99032893-99032937                           | NM_178918:33      | Utp15      | INSIDE                 | 0.482                                           | 0.569                            | 2426.49             | 1380.02             | 0.274                            | 1982.66             | 543.99              |
| A_68_P23872778 | chr5:88983098-88983142                            | NM_023054:-387    | Utp3       | PROMOTER               | 0.232                                           | 0.583                            | 1209.59             | 705.76              | 0.135                            | 960.89              | 130.11              |

| ProbeName      | Target position of probe on CpG island microarray | TargetID           | GeneSymbol | CpG island Description | Ratio of relative methylation (TiO2-NP/Vehicle) | Sham group                       |                     |                     | TiO <sub>2</sub> -H group        |                     |                     |
|----------------|---------------------------------------------------|--------------------|------------|------------------------|-------------------------------------------------|----------------------------------|---------------------|---------------------|----------------------------------|---------------------|---------------------|
|                |                                                   |                    |            |                        |                                                 | Relative methylation (Cy-5/Cy-3) | Cy-3 signal (Input) | Cy-5 signal (MeDIP) | Relative methylation (Cy-5/Cy-3) | Cy-3 signal (Input) | Cy-5 signal (MeDIP) |
| A_68_P23872839 | chr5:88993614-88993669                            | NM_023054:10134    | Utp3       | DOWNSTREAM             | 0.299                                           | 0.459                            | 1123.80             | 515.85              | 0.137                            | 847.87              | 116.46              |
| A_68_P26947989 | chr10:12588953-12588997                           | NM_011682:-7441    | Utrn       | PROMOTER               | 0.558                                           | 0.531                            | 974.37              | 517.69              | 0.296                            | 848.90              | 251.55              |
| A_68_P20191089 | chr1:43884192-43884236                            | NM_026430:339      | Uxs1       | INSIDE                 | 0.476                                           | 0.662                            | 867.69              | 574.69              | 0.315                            | 768.64              | 242.48              |
| A_68_P32290858 | chrX:20539135-20539180                            | NM_013840:-53      | Uxt        | DIVERGENT_PROMOTER     | 0.171                                           | 2.121                            | 1155.39             | 2450.36             | 0.362                            | 473.19              | 171.34              |
| A_68_P23409803 | chr4:150432014-150432058                          | NM_009498:26       | Vamp3      | INSIDE                 | 0.636                                           | 0.349                            | 1524.16             | 532.27              | 0.222                            | 1315.57             | 292.32              |
| A_68_P20778488 | chr1:164500535-164500579                          | NM_016796:-402     | Vamp4      | PROMOTER               | 0.228                                           | 0.611                            | 1052.93             | 643.04              | 0.139                            | 869.56              | 120.86              |
| A_68_P20778493 | chr1:164501104-164501148                          | NM_016796:168      | Vamp4      | INSIDE                 | 0.469                                           | 0.563                            | 2489.20             | 1400.49             | 0.264                            | 2284.57             | 602.27              |
| A_68_P24541408 | chr6:72330305-72330349                            | NM_001080742:136   | Vamp5      | INSIDE                 | 0.199                                           | 0.553                            | 3609.20             | 1994.65             | 0.110                            | 2799.63             | 308.22              |
| A_68_P24541411 | chr6:72330618-72330663                            | NM_001080742:-178  | Vamp5      | PROMOTER               | 0.336                                           | 0.706                            | 1265.76             | 894.05              | 0.237                            | 952.72              | 226.24              |
| A_68_P31156940 | chr17:35137702-35137746                           | NM_011690:-127     | Vars       | PROMOTER               | 0.611                                           | 0.658                            | 1243.88             | 819.07              | 0.402                            | 1014.05             | 407.80              |
| A_68_P31160312 | chr17:35804249-35804293                           | NM_175137:267      | Vars2      | INSIDE                 | 0.639                                           | 0.659                            | 2132.19             | 1404.93             | 0.421                            | 1507.83             | 635.08              |
| A_68_P28611531 | chr12:88019465-88019515                           | NM_177354:-159     | Vash1      | PROMOTER               | 0.515                                           | 0.684                            | 1095.39             | 748.84              | 0.352                            | 803.68              | 282.97              |
| A_68_P28611533 | chr12:88019760-88019804                           | NM_177354:133      | Vash1      | INSIDE                 | 0.374                                           | 0.304                            | 2327.26             | 706.63              | 0.114                            | 2022.48             | 229.66              |
| A_68_P20935543 | chr1:192802468-192802514                          | NM_144879:387      | Vash2      | INSIDE                 | 0.239                                           | 0.557                            | 1140.56             | 635.48              | 0.133                            | 899.07              | 119.93              |
| A_68_P24992393 | chr7:19856667-19856716                            | NM_009499:512      | Vasp       | INSIDE                 | 0.162                                           | 1.495                            | 1320.58             | 1974.31             | 0.242                            | 944.98              | 228.85              |
| A_68_P24992403 | chr7:19857732-19857776                            | NM_009499:-551     | Vasp       | PROMOTER               | 0.452                                           | 0.450                            | 2584.13             | 1162.00             | 0.203                            | 1938.30             | 393.84              |
| A_68_P28074035 | chr11:101327600-101327644                         | NM_012037:-109     | Vat1       | DIVERGENT_PROMOTER     | 0.377                                           | 0.555                            | 2583.48             | 1432.77             | 0.209                            | 1999.11             | 417.91              |
| A_68_P31260843 | chr17:57415026-57415070                           | NM_001163815:-3474 | Vav1       | PROMOTER               | 0.616                                           | 0.575                            | 2460.19             | 1414.40             | 0.354                            | 2166.22             | 766.78              |
| A_68_P21084619 | chr2:27281633-27281677                            | NM_009500:691      | Vav2       | INSIDE                 | 0.513                                           | 0.596                            | 2520.63             | 1502.35             | 0.306                            | 1744.29             | 533.62              |
| A_68_P21084623 | chr2:27282256-27282300                            | NM_009500:67       | Vav2       | INSIDE                 | 0.473                                           | 0.558                            | 3145.39             | 1754.33             | 0.264                            | 2375.05             | 626.26              |
| A_68_P32217657 | chr19:59240762-59240806                           | NM_009501:3735     | Vax1       | INSIDE                 | 0.331                                           | 0.488                            | 1580.67             | 770.74              | 0.162                            | 1310.75             | 211.81              |
| A_68_P32217661 | chr19:59241208-59241252                           | NM_009501:3289     | Vax1       | INSIDE                 | 0.621                                           | 0.630                            | 866.15              | 545.71              | 0.391                            | 762.10              | 298.23              |
| A_68_P32217702 | chr19:59246036-59246083                           | NM_009501:-1540    | Vax1       | PROMOTER               | 0.368                                           | 1.763                            | 2005.02             | 3535.34             | 0.650                            | 1394.70             | 906.05              |
| A_68_P24595035 | chr6:83661384-83661428                            | NM_011912:149      | Vax2       | INSIDE                 | 0.341                                           | 0.577                            | 1338.25             | 772.15              | 0.197                            | 927.73              | 182.45              |
| A_68_P24595030 | chr6:83660707-83660751                            | NR_002873:198      | Vax2os1    | INSIDE                 | 0.351                                           | 0.734                            | 2299.57             | 1688.85             | 0.258                            | 1778.87             | 458.13              |
| A_68_P29449769 | chr14:21748618-21748662                           | NM_009502:-14      | Vcl        | PROMOTER               | 0.413                                           | 0.610                            | 3674.94             | 2241.40             | 0.252                            | 2828.59             | 712.86              |
| A_68_P22869408 | chr4:43013304-43013349                            | NM_009503:53       | Vcp        | INSIDE                 | 0.123                                           | 0.560                            | 2539.12             | 1421.82             | 0.069                            | 1820.77             | 125.42              |
| A_68_P20023918 | chr1:9737605-9737655                              | NM_173443:833      | Vcpip1     | INSIDE                 | 0.289                                           | 0.585                            | 1069.26             | 625.55              | 0.169                            | 683.09              | 115.38              |
| A_68_P20023926 | chr1:9738516-9738560                              | NM_173443:-75      | Vcpip1     | PROMOTER               | 0.463                                           | 0.472                            | 1517.67             | 716.53              | 0.219                            | 1190.45             | 260.22              |
| A_68_P27798797 | chr11:52174094-52174138                           | NM_011694:-500     | Vdac1      | PROMOTER               | 0.406                                           | 0.650                            | 1764.27             | 1146.33             | 0.264                            | 1315.69             | 346.88              |
| A_68_P30471848 | chr15:97738946-97738998                           | NM_009504:-245     | Vdr        | PROMOTER               | 0.164                                           | 0.620                            | 1669.97             | 1035.46             | 0.102                            | 1209.23             | 123.13              |
| A_68_P30471849 | chr15:97739034-97739078                           | NM_009504:-329     | Vdr        | PROMOTER               | 0.479                                           | 0.585                            | 1964.43             | 1148.28             | 0.280                            | 1583.43             | 443.33              |
| A_68_P31204657 | chr17:46167697-46167741                           | NM_001110266:-5606 | Vegfa      | PROMOTER               | 0.204                                           | 0.642                            | 2436.41             | 1563.93             | 0.131                            | 1890.76             | 247.36              |
| A_68_P31204662 | chr17:46168262-46168306                           | NM_001110266:-6172 | Vegfa      | PROMOTER               | 0.655                                           | 0.559                            | 1009.01             | 563.57              | 0.366                            | 853.50              | 312.15              |
| A_68_P31204666 | chr17:46168644-46168688                           | NM_001110266:-6554 | Vegfa      | PROMOTER               | 0.255                                           | 0.501                            | 1374.64             | 688.78              | 0.128                            | 997.78              | 127.64              |
| A_68_P31204667 | chr17:46168826-46168870                           | NM_001110266:-6736 | Vegfa      | PROMOTER               | 0.278                                           | 0.407                            | 1714.38             | 697.41              | 0.113                            | 1245.65             | 140.94              |
| A_68_P25877023 | chr8:55163035-55163079                            | NM_009506:171      | Vegfc      | INSIDE                 | 0.648                                           | 0.603                            | 2737.76             | 1650.89             | 0.391                            | 2305.21             | 901.17              |
| A_68_P27357053 | chr10:93498402-93498447                           | NM_172538:69       | Vezt       | INSIDE                 | 0.181                                           | 0.651                            | 1418.07             | 923.77              | 0.118                            | 1056.89             | 124.90              |
| A_68_P27357055 | chr10:93498582-93498626                           | NM_172538:-111     | Vezt       | DIVERGENT_PROMOTER     | 0.187                                           | 0.591                            | 3740.14             | 2209.91             | 0.111                            | 2827.06             | 313.16              |
| A_68_P30826536 | chr16:65815148-65815192                           | NM_028572:-707     | Vgll3      | PROMOTER               | 0.624                                           | 0.624                            | 1090.77             | 680.92              | 0.390                            | 952.90              | 371.16              |
| A_68_P24760554 | chr6:113574432-113574476                          | NM_009507:440      | Vhl        | INSIDE                 | 0.476                                           | 0.671                            | 2660.19             | 1784.19             | 0.319                            | 2034.11             | 649.02              |
| A_68_P21017265 | chr2:13496059-13496103                            | NM_011701:143      | Vim        | INSIDE                 | 0.463                                           | 0.494                            | 1039.25             | 512.94              | 0.228                            | 894.88              | 204.34              |
| A_68_P21017267 | chr2:13496235-13496279                            | NM_011701:319      | Vim        | INSIDE                 | 0.165                                           | 0.620                            | 1830.73             | 1134.17             | 0.102                            | 1388.10             | 142.16              |
| A_68_P21017268 | chr2:13496366-13496411                            | NM_011701:451      | Vim        | INSIDE                 | 0.451                                           | 0.547                            | 1184.67             | 647.92              | 0.247                            | 982.22              | 242.37              |

| ProbeName      | Target position of probe on CpG island microarray | TargetID          | GeneSymbol | CpG island Description | Ratio of relative methylation (TiO2-NP/Vehicle) | Sham group                       |                     |                     | TiO <sub>2</sub> -H group        |                     |                     |
|----------------|---------------------------------------------------|-------------------|------------|------------------------|-------------------------------------------------|----------------------------------|---------------------|---------------------|----------------------------------|---------------------|---------------------|
|                |                                                   |                   |            |                        |                                                 | Relative methylation (Cy-5/Cy-3) | Cy-3 signal (Input) | Cy-5 signal (MeDIP) | Relative methylation (Cy-5/Cy-3) | Cy-3 signal (Input) | Cy-5 signal (MeDIP) |
| A_68_P26884795 | chr9:121578529-121578573                          | NM_011703:26717   | Vipr1      | INSIDE                 | 0.531                                           | 0.618                            | 2321.23             | 1433.59             | 0.328                            | 1719.39             | 563.48              |
| A_68_P28765897 | chr12:117316101-117316145                         | NM_009511:-73     | Vipr2      | PROMOTER               | 0.089                                           | 0.738                            | 2223.11             | 1641.65             | 0.066                            | 1824.72             | 120.40              |
| A_68_P24091295 | chr5:130418466-130418510                          | NM_001001327:506  | Vkore111   | INSIDE                 | 0.594                                           | 0.448                            | 1611.24             | 721.77              | 0.266                            | 1259.09             | 334.89              |
| A_68_P32039604 | chr19:27293281-27293330                           | NM_001161420:1796 | Vldlr      | INSIDE                 | 0.305                                           | 0.474                            | 1209.02             | 572.49              | 0.144                            | 833.43              | 120.26              |
| A_68_P31257916 | chr17:56856619-56856667                           | NM_178926:-298    | Vmac       | PROMOTER               | 0.172                                           | 3.875                            | 7531.15             | 29185.39            | 0.666                            | 4225.32             | 2812.82             |
| A_68_P31257917 | chr17:56856713-56856757                           | NM_178926:-390    | Vmac       | PROMOTER               | 0.168                                           | 2.180                            | 6992.44             | 15243.02            | 0.367                            | 4178.40             | 1532.51             |
| A_68_P31257918 | chr17:56856812-56856859                           | NM_178926:-491    | Vmac       | PROMOTER               | 0.178                                           | 0.711                            | 1313.12             | 933.32              | 0.126                            | 919.68              | 116.17              |
| A_68_P26805303 | chr9:106724052-106724097                          | NM_001015507:-232 | Vprbp      | PROMOTER               | 0.151                                           | 0.630                            | 1992.32             | 1254.31             | 0.095                            | 1611.18             | 153.39              |
| A_68_P26805304 | chr9:106724237-106724281                          | NM_001015507:-48  | Vprbp      | PROMOTER               | 0.507                                           | 0.710                            | 1469.79             | 1043.29             | 0.360                            | 1103.93             | 397.48              |
| A_68_P26805312 | chr9:106725024-106725068                          | NM_001015507:740  | Vprbp      | INSIDE                 | 0.291                                           | 0.639                            | 1814.16             | 1159.24             | 0.186                            | 1451.16             | 269.83              |
| A_68_P26467229 | chr9:44169555-44169599                            | NM_027889:177     | Vps11      | INSIDE                 | 0.261                                           | 0.687                            | 2489.70             | 1710.48             | 0.180                            | 1802.70             | 323.81              |
| A_68_P26467230 | chr9:44169640-44169684                            | NM_027889:91      | Vps11      | INSIDE                 | 0.345                                           | 0.616                            | 3114.82             | 1920.10             | 0.213                            | 2334.67             | 497.19              |
| A_68_P30133048 | chr15:35300905-35300956                           | NM_177151:-370    | Vps13b     | PROMOTER               | 0.403                                           | 0.492                            | 1070.04             | 526.44              | 0.198                            | 848.32              | 168.32              |
| A_68_P21568805 | chr2:119114248-119114292                          | NM_172269:-207    | Vps18      | PROMOTER               | 0.187                                           | 0.463                            | 1877.48             | 869.97              | 0.086                            | 1371.56             | 118.54              |
| A_68_P21568807 | chr2:119114429-119114473                          | NM_172269:-27     | Vps18      | PROMOTER               | 0.612                                           | 0.443                            | 1270.63             | 562.46              | 0.271                            | 882.92              | 239.10              |
| A_68_P27186311 | chr10:61949916-61949968                           | NM_133672:-389    | Vps26a     | PROMOTER               | 0.061                                           | 1.371                            | 1933.92             | 2651.77             | 0.084                            | 1414.91             | 118.56              |
| A_68_P24049902 | chr5:122804456-122804500                          | NM_019780:57      | Vps29      | INSIDE                 | 0.514                                           | 0.688                            | 2582.45             | 1776.29             | 0.353                            | 1990.30             | 703.43              |
| A_68_P24056367 | chr5:124022745-124022789                          | NM_029929:258     | Vps33a     | INSIDE                 | 0.400                                           | 0.514                            | 1120.84             | 576.62              | 0.206                            | 884.82              | 181.92              |
| A_68_P24056370 | chr5:124023089-124023133                          | NM_029929:-86     | Vps33a     | PROMOTER               | 0.546                                           | 0.646                            | 1251.04             | 808.41              | 0.353                            | 1059.59             | 373.89              |
| A_68_P26024221 | chr8:87823033-87823077                            | NM_022997:342     | Vps35      | INSIDE                 | 0.580                                           | 0.564                            | 1183.96             | 668.26              | 0.327                            | 1087.68             | 356.17              |
| A_68_P26024222 | chr8:87823113-87823157                            | NM_022997:262     | Vps35      | INSIDE                 | 0.112                                           | 0.527                            | 3767.11             | 1984.30             | 0.059                            | 2728.73             | 161.17              |
| A_68_P26024223 | chr8:87823249-87823293                            | NM_022997:126     | Vps35      | INSIDE                 | 0.385                                           | 0.705                            | 4010.05             | 2828.26             | 0.271                            | 3021.53             | 820.03              |
| A_68_P31952189 | chr19:10763284-10763328                           | NM_181403:2       | Vps37c     | INSIDE                 | 0.332                                           | 0.460                            | 1485.26             | 682.69              | 0.153                            | 1210.67             | 184.90              |
| A_68_P31952190 | chr19:10763362-10763406                           | NM_181403:80      | Vps37c     | INSIDE                 | 0.360                                           | 0.419                            | 2333.19             | 977.40              | 0.151                            | 1928.16             | 290.51              |
| A_68_P21574793 | chr2:120178464-120178508                          | NM_147153:383     | Vps39      | INSIDE                 | 0.273                                           | 0.459                            | 1625.73             | 745.88              | 0.125                            | 1311.91             | 164.56              |
| A_68_P27635753 | chr11:21139469-21139513                           | NM_139061:599     | Vps54      | INSIDE                 | 0.551                                           | 0.630                            | 1069.12             | 673.57              | 0.347                            | 883.52              | 306.69              |
| A_68_P30592418 | chr16:21423272-21423316                           | NM_001081366:104  | Vps8       | INSIDE                 | 0.381                                           | 0.490                            | 1413.78             | 693.21              | 0.187                            | 1241.36             | 232.03              |
| A_68_P28712490 | chr12:107248322-107248369                         | NM_001029843:-127 | Vrk1       | PROMOTER               | 0.268                                           | 0.492                            | 1236.22             | 608.73              | 0.132                            | 913.09              | 120.62              |
| A_68_P28712491 | chr12:107248439-107248483                         | NM_001029843:-12  | Vrk1       | PROMOTER               | 0.417                                           | 0.553                            | 1385.42             | 765.60              | 0.230                            | 1094.21             | 251.90              |
| A_68_P24019925 | chr5:117769743-117769788                          | NM_001033311:491  | Vsig10     | INSIDE                 | 0.196                                           | 0.476                            | 1496.85             | 712.00              | 0.093                            | 1262.77             | 117.99              |
| A_68_P25075267 | chr7:48155196-48155240                            | NM_021387:571     | Vstm2b     | INSIDE                 | 0.587                                           | 0.600                            | 1537.76             | 922.13              | 0.352                            | 1083.43             | 381.25              |
| A_68_P25075288 | chr7:48157851-48157898                            | NM_021387:3227    | Vstm2b     | INSIDE                 | 0.473                                           | 0.630                            | 1247.51             | 786.47              | 0.298                            | 905.97              | 270.08              |
| A_68_P21780068 | chr2:157767229-157767273                          | NM_198627:26862   | Vstm2l     | INSIDE                 | 0.422                                           | 0.597                            | 1879.46             | 1122.76             | 0.252                            | 1501.75             | 379.02              |
| A_68_P21740453 | chr2:150514165-150514209                          | NM_054068:687     | Vsx1       | INSIDE                 | 0.182                                           | 0.599                            | 1922.73             | 1151.76             | 0.109                            | 1459.65             | 158.99              |
| A_68_P28599059 | chr12:85910912-85910956                           | NM_007701:133     | Vsx2       | INSIDE                 | 0.107                                           | 0.642                            | 4496.75             | 2888.33             | 0.069                            | 3263.32             | 223.78              |
| A_68_P28599061 | chr12:85911065-85911109                           | NM_007701:285     | Vsx2       | INSIDE                 | 0.486                                           | 0.611                            | 1566.71             | 957.78              | 0.297                            | 1357.31             | 403.32              |
| A_68_P26958515 | chr10:14425185-14425230                           | NM_025418:88      | Vta1       | INSIDE                 | 0.313                                           | 0.701                            | 1707.62             | 1197.33             | 0.220                            | 1278.69             | 280.73              |
| A_68_P26958516 | chr10:14425277-14425321                           | NM_025418:-3      | Vta1       | PROMOTER               | 0.231                                           | 0.633                            | 1890.19             | 1195.71             | 0.146                            | 1397.50             | 204.00              |
| A_68_P28567992 | chr12:80273136-80273180                           | NM_016800:287     | Vti1b      | INSIDE                 | 0.499                                           | 0.647                            | 2254.18             | 1459.04             | 0.323                            | 1866.96             | 602.41              |
| A_68_P28567993 | chr12:80273243-80273287                           | NM_016800:181     | Vti1b      | INSIDE                 | 0.283                                           | 0.629                            | 1090.67             | 686.21              | 0.178                            | 868.86              | 154.77              |
| A_68_P23440510 | chr4:155144347-155144391                          | NM_147776:4302    | Vwal       | INSIDE                 | 0.096                                           | 1.780                            | 4304.34             | 7660.18             | 0.171                            | 2725.87             | 465.45              |
| A_68_P23440513 | chr4:155144647-155144691                          | NM_147776:4002    | Vwal       | INSIDE                 | 0.630                                           | 0.560                            | 1129.99             | 633.04              | 0.353                            | 937.60              | 331.16              |
| A_68_P23440545 | chr4:155148332-155148376                          | NM_147776:316     | Vwal       | INSIDE                 | 0.210                                           | 0.618                            | 1236.84             | 764.72              | 0.130                            | 912.07              | 118.50              |
| A_68_P23440546 | chr4:155148502-155148549                          | NM_147776:145     | Vwal       | INSIDE                 | 0.134                                           | 0.746                            | 3334.18             | 2486.17             | 0.100                            | 2021.41             | 201.88              |

| ProbeName      | Target position of probe on CpG island microarray | TargetID         | GeneSymbol | CpG island Description | Ratio of relative methylation (TiO2-NP/Vehicle) | Sham group                       |                     |                     | TiO <sub>2</sub> -H group        |                     |                     |
|----------------|---------------------------------------------------|------------------|------------|------------------------|-------------------------------------------------|----------------------------------|---------------------|---------------------|----------------------------------|---------------------|---------------------|
|                |                                                   |                  |            |                        |                                                 | Relative methylation (Cy-5/Cy-3) | Cy-3 signal (Input) | Cy-5 signal (MeDIP) | Relative methylation (Cy-5/Cy-3) | Cy-3 signal (Input) | Cy-5 signal (MeDIP) |
| A_68_P23440547 | chr4:155148630-155148674                          | NM_147776:18     | Vwa1       | INSIDE                 | 0.521                                           | 0.662                            | 2450.19             | 1622.79             | 0.345                            | 1828.98             | 630.97              |
| A_68_P32203589 | chr19:56948890-56948934                           | NM_172840:7      | Vwa2       | INSIDE                 | 0.661                                           | 0.555                            | 1557.43             | 863.66              | 0.367                            | 1261.95             | 462.79              |
| A_68_P30588339 | chr16:20591420-20591465                           | NM_182636:1788   | Vwa5b2     | INSIDE                 | 0.299                                           | 0.507                            | 1289.65             | 653.54              | 0.151                            | 985.18              | 149.07              |
| A_68_P27589657 | chr11:11016303-11016347                           | NM_177033:2306   | Vwc2       | INSIDE                 | 0.469                                           | 0.643                            | 1224.08             | 786.97              | 0.302                            | 1031.46             | 311.26              |
| A_68_P27589658 | chr11:11016375-11016419                           | NM_177033:2378   | Vwc2       | INSIDE                 | 0.308                                           | 0.325                            | 1628.81             | 529.54              | 0.100                            | 1221.17             | 122.11              |
| A_68_P29531321 | chr14:35487082-35487126                           | NM_001004436:9   | Wapal      | PROMOTER               | 0.524                                           | 0.495                            | 3713.31             | 1839.03             | 0.259                            | 3076.43             | 798.07              |
| A_68_P29531325 | chr14:35487686-35487738                           | NM_001004436:599 | Wapal      | INSIDE                 | 0.234                                           | 0.416                            | 1647.16             | 684.76              | 0.097                            | 1240.23             | 120.52              |
| A_68_P29531327 | chr14:35487897-35487941                           | NM_001004436:805 | Wapal      | INSIDE                 | 0.529                                           | 0.629                            | 1321.86             | 831.18              | 0.333                            | 1027.48             | 341.99              |
| A_68_P22362400 | chr3:98945013-98945057                            | NM_027462:22     | Wars2      | INSIDE                 | 0.647                                           | 0.586                            | 1480.70             | 867.95              | 0.379                            | 1232.09             | 467.18              |
| A_68_P22362401 | chr3:98945093-98945137                            | NM_027462:102    | Wars2      | INSIDE                 | 0.615                                           | 0.591                            | 1894.53             | 1120.60             | 0.363                            | 1479.21             | 537.67              |
| A_68_P22362402 | chr3:98945208-98945252                            | NM_027462:218    | Wars2      | INSIDE                 | 0.429                                           | 0.445                            | 1547.83             | 688.13              | 0.191                            | 1188.20             | 226.60              |
| A_68_P27086283 | chr10:40603268-40603315                           | NM_031877:48     | Wasf1      | DIVERGENT_PROMOTER     | 0.331                                           | 0.549                            | 1332.25             | 731.06              | 0.182                            | 1022.21             | 185.78              |
| A_68_P27086284 | chr10:40603346-40603390                           | NM_031877:29     | Wasf1      | INSIDE                 | 0.586                                           | 0.617                            | 1123.31             | 692.57              | 0.361                            | 904.19              | 326.61              |
| A_68_P23315907 | chr4:132686541-132686585                          | NM_153423:15     | Wasf2      | INSIDE                 | 0.302                                           | 0.494                            | 1284.81             | 635.26              | 0.149                            | 1019.39             | 152.15              |
| A_68_P24097663 | chr5:131782424-131782475                          | NM_145218:943    | Wbscr17    | INSIDE                 | 0.525                                           | 0.541                            | 947.64              | 512.44              | 0.284                            | 790.04              | 224.30              |
| A_68_P24097670 | chr5:131783250-131783294                          | NM_145218:120    | Wbscr17    | INSIDE                 | 0.369                                           | 0.747                            | 4369.97             | 3265.77             | 0.275                            | 3230.56             | 889.72              |
| A_68_P24097673 | chr5:131783669-131783713                          | NM_145218:-298   | Wbscr17    | PROMOTER               | 0.584                                           | 0.547                            | 1383.22             | 756.17              | 0.319                            | 1156.88             | 369.14              |
| A_68_P24114550 | chr5:135539661-135539705                          | NM_025375:298    | Wbscr22    | INSIDE                 | 0.192                                           | 0.495                            | 2603.69             | 1290.00             | 0.095                            | 2108.83             | 200.85              |
| A_68_P24113930 | chr5:135408345-135408389                          | NM_024479:124    | Wbscr27    | INSIDE                 | 0.201                                           | 0.706                            | 2367.41             | 1671.21             | 0.142                            | 1727.80             | 244.89              |
| A_68_P20377582 | chr1:79758038-79758082                            | NM_001111279:284 | Wdfy1      | INSIDE                 | 0.575                                           | 0.683                            | 4103.31             | 2801.99             | 0.393                            | 2836.70             | 1114.77             |
| A_68_P23621601 | chr5:38952237-38952281                            | NM_011715:576    | Wdr1       | INSIDE                 | 0.280                                           | 0.536                            | 1344.69             | 721.07              | 0.150                            | 1059.34             | 159.06              |
| A_68_P23621602 | chr5:38952317-38952368                            | NM_011715:492    | Wdr1       | INSIDE                 | 0.253                                           | 0.362                            | 1821.20             | 659.43              | 0.092                            | 1336.12             | 122.32              |
| A_68_P23621603 | chr5:38952428-38952472                            | NM_011715:384    | Wdr1       | INSIDE                 | 0.568                                           | 0.543                            | 1462.37             | 794.23              | 0.308                            | 1059.71             | 326.78              |
| A_68_P28730612 | chr12:110132421-110132465                         | NM_177602:-39    | Wdr25      | DIVERGENT_PROMOTER     | 0.346                                           | 0.584                            | 2508.95             | 1464.63             | 0.202                            | 1879.81             | 379.22              |
| A_68_P20880187 | chr1:183140858-183140911                          | NM_145514:1225   | Wdr26      | INSIDE                 | 0.068                                           | 1.852                            | 1729.94             | 3204.00             | 0.126                            | 1230.71             | 155.21              |
| A_68_P20880189 | chr1:183141032-183141076                          | NM_145514:1055   | Wdr26      | INSIDE                 | 0.250                                           | 0.475                            | 1247.65             | 593.23              | 0.119                            | 978.33              | 116.08              |
| A_68_P22964621 | chr4:62131699-62131744                            | NM_023597:185    | Wdr31      | INSIDE                 | 0.207                                           | 1.446                            | 1591.49             | 2301.38             | 0.299                            | 1144.37             | 341.99              |
| A_68_P28225579 | chr12:8980872-8980920                             | NM_001159527:90  | Wdr35      | INSIDE                 | 0.156                                           | 0.649                            | 1687.23             | 1094.60             | 0.101                            | 1151.98             | 116.56              |
| A_68_P28813401 | chr13:8870209-8870253                             | NM_172445:58     | Wdr37      | INSIDE                 | 0.308                                           | 0.697                            | 4478.10             | 3121.35             | 0.215                            | 3238.33             | 695.05              |
| A_68_P31140216 | chr17:31649029-31649073                           | NM_021322:382    | Wdr4       | INSIDE                 | 0.384                                           | 0.655                            | 1367.68             | 895.97              | 0.252                            | 1170.53             | 294.66              |
| A_68_P31335318 | chr17:71966149-71966193                           | NM_175639:616    | Wdr43      | INSIDE                 | 0.542                                           | 0.536                            | 1731.96             | 927.84              | 0.290                            | 1479.80             | 429.51              |
| A_68_P32300610 | chrX:23270059-23270108                            | NM_175180:-159   | Wdr44      | PROMOTER               | 0.068                                           | 1.739                            | 2450.06             | 4260.32             | 0.118                            | 1028.19             | 121.48              |
| A_68_P32300615 | chrX:23270584-23270630                            | NM_175180:364    | Wdr44      | INSIDE                 | 0.422                                           | 0.627                            | 1040.85             | 652.64              | 0.264                            | 459.39              | 121.46              |
| A_68_P32239781 | chrX:7291710-7291754                              | NM_172372:-7642  | Wdr45      | PROMOTER               | 0.126                                           | 1.812                            | 1260.22             | 2284.02             | 0.228                            | 529.90              | 120.67              |
| A_68_P31151137 | chr17:34077801-34077845                           | NM_020603:155    | Wdr46      | INSIDE                 | 0.483                                           | 0.707                            | 1352.91             | 956.04              | 0.341                            | 1024.41             | 349.80              |
| A_68_P22413520 | chr3:108394071-108394115                          | NM_181400:-103   | Wdr47      | PROMOTER               | 0.381                                           | 0.485                            | 1558.91             | 755.65              | 0.185                            | 1300.47             | 240.11              |
| A_68_P22413525 | chr3:108394707-108394751                          | NM_181400:533    | Wdr47      | INSIDE                 | 0.435                                           | 0.486                            | 2053.26             | 997.28              | 0.211                            | 1599.90             | 338.04              |
| A_68_P22413527 | chr3:108395008-108395052                          | NM_181400:835    | Wdr47      | INSIDE                 | 0.212                                           | 0.674                            | 1234.98             | 832.66              | 0.143                            | 958.45              | 137.22              |
| A_68_P26874898 | chr9:119803985-119804029                          | NM_026236:-6     | Wdr48      | PROMOTER               | 0.401                                           | 0.449                            | 1258.18             | 565.02              | 0.180                            | 961.70              | 173.28              |
| A_68_P26874902 | chr9:119804502-119804546                          | NM_026236:512    | Wdr48      | INSIDE                 | 0.223                                           | 0.440                            | 1385.24             | 609.24              | 0.098                            | 1180.24             | 115.63              |
| A_68_P21085075 | chr2:27370596-27370640                            | NM_080848:-48    | Wdr5       | PROMOTER               | 0.268                                           | 0.704                            | 5083.37             | 3577.92             | 0.189                            | 3778.18             | 712.26              |
| A_68_P21085240 | chr2:27395797-27395841                            | NM_080848:25152  | Wdr5       | DOWNSTREAM             | 0.274                                           | 0.468                            | 1597.32             | 747.42              | 0.128                            | 1382.51             | 177.34              |
| A_68_P30651594 | chr16:32247382-32247433                           | NM_026898:69     | Wdr53      | INSIDE                 | 0.116                                           | 0.636                            | 2138.23             | 1359.01             | 0.074                            | 1626.32             | 119.77              |
| A_68_P30673430 | chr16:36041581-36041625                           | NM_027113:327    | Wdr5b      | INSIDE                 | 0.302                                           | 0.628                            | 1457.42             | 915.53              | 0.190                            | 1119.50             | 212.43              |

| ProbeName      | Target position of probe on CpG island microarray | TargetID           | GeneSymbol | CpG island Description | Ratio of relative methylation (TiO2-NP/Vehicle) | Sham group                       |                     |                     | TiO <sub>2</sub> -H group        |                     |                     |
|----------------|---------------------------------------------------|--------------------|------------|------------------------|-------------------------------------------------|----------------------------------|---------------------|---------------------|----------------------------------|---------------------|---------------------|
|                |                                                   |                    |            |                        |                                                 | Relative methylation (Cy-5/Cy-3) | Cy-3 signal (Input) | Cy-5 signal (MeDIP) | Relative methylation (Cy-5/Cy-3) | Cy-3 signal (Input) | Cy-5 signal (MeDIP) |
| A_68_P26815581 | chr9:108480573-108480617                          | NM_031392:407      | Wdr6       | INSIDE                 | 0.229                                           | 1.755                            | 3847.46             | 6751.21             | 0.402                            | 2617.85             | 1051.32             |
| A_68_P26815583 | chr9:108480765-108480809                          | NM_031392:215      | Wdr6       | INSIDE                 | 0.343                                           | 0.751                            | 4941.07             | 3708.80             | 0.258                            | 3387.87             | 873.24              |
| A_68_P25030741 | chr7:31065286-31065332                            | NM_146186:132      | Wdr62      | INSIDE                 | 0.179                                           | 0.561                            | 1506.21             | 844.99              | 0.101                            | 1176.12             | 118.34              |
| A_68_P30244924 | chr15:57743688-57743732                           | NM_001167679:-43   | Wdr67      | PROMOTER               | 0.665                                           | 0.704                            | 1461.45             | 1028.98             | 0.468                            | 1213.96             | 568.55              |
| A_68_P20198785 | chr3:45852285-45852329                            | NM_028599:-39      | Wdr75      | PROMOTER               | 0.574                                           | 0.557                            | 1204.36             | 670.33              | 0.319                            | 1004.44             | 320.88              |
| A_68_P22400150 | chr3:105761819-105761870                          | NM_027432:-571     | Wdr77      | PROMOTER               | 0.178                                           | 0.456                            | 1956.63             | 891.26              | 0.081                            | 1557.28             | 126.30              |
| A_68_P22400156 | chr3:105762584-105762628                          | NM_027432:191      | Wdr77      | INSIDE                 | 0.390                                           | 0.258                            | 3120.47             | 803.89              | 0.100                            | 2417.29             | 242.77              |
| A_68_P23164319 | chr4:102786672-102786716                          | NM_146254:210      | Wdr78      | INSIDE                 | 0.436                                           | 0.438                            | 2729.97             | 1196.26             | 0.191                            | 2013.77             | 384.95              |
| A_68_P23164320 | chr4:102786738-102786782                          | NM_146254:144      | Wdr78      | INSIDE                 | 0.317                                           | 0.528                            | 2194.19             | 1157.74             | 0.167                            | 1559.94             | 260.85              |
| A_68_P23429333 | chr4:153515623-153515667                          | NM_021499:-836     | Wdr8       | DIVERGENT_PROMOTER     | 0.119                                           | 0.723                            | 2820.28             | 2039.80             | 0.086                            | 1905.93             | 164.32              |
| A_68_P23429335 | chr4:153515771-153515815                          | NM_021499:-688     | Wdr8       | DIVERGENT_PROMOTER     | 0.308                                           | 0.637                            | 2009.41             | 1280.38             | 0.196                            | 1424.96             | 279.41              |
| A_68_P27926185 | chr11:75268208-75268252                           | NM_138950:-11      | Wdr81      | DIVERGENT_PROMOTER     | 0.591                                           | 0.590                            | 998.65              | 589.12              | 0.349                            | 725.60              | 252.95              |
| A_68_P27926186 | chr11:75268311-75268355                           | NM_138950:-113     | Wdr81      | DIVERGENT_PROMOTER     | 0.499                                           | 0.685                            | 1489.05             | 1019.78             | 0.341                            | 1045.26             | 356.93              |
| A_68_P21069043 | chr2:24817956-24818000                            | NM_026044:37       | Wdr85      | INSIDE                 | 0.364                                           | 0.709                            | 2243.20             | 1589.40             | 0.258                            | 1843.84             | 475.47              |
| A_68_P23543621 | chr5:24236647-24236691                            | NM_001081441:-170  | Wdr86      | PROMOTER               | 0.161                                           | 0.650                            | 1490.59             | 968.61              | 0.105                            | 1131.20             | 118.30              |
| A_68_P28549762 | chr12:76770236-76770280                           | NM_028203:266      | Wdr89      | INSIDE                 | 0.447                                           | 0.735                            | 2446.61             | 1797.08             | 0.328                            | 1847.07             | 606.24              |
| A_68_P30246279 | chr15:57972958-57973002                           | NM_029734:-10      | Wdyhvl     | DIVERGENT_PROMOTER     | 0.289                                           | 0.601                            | 950.62              | 571.54              | 0.174                            | 671.27              | 116.80              |
| A_68_P25411817 | chr7:117265589-117265633                          | NM_009516:38       | Wee1       | INSIDE                 | 0.511                                           | 0.375                            | 1760.24             | 660.82              | 0.192                            | 1550.17             | 297.36              |
| A_68_P22970353 | chr4:63077625-63077669                            | NM_001008797:16710 | Whrn       | INSIDE                 | 0.626                                           | 2.656                            | 3032.62             | 8053.90             | 1.661                            | 2170.31             | 3605.79             |
| A_68_P22970869 | chr4:63155665-63155709                            | NM_001008791:1299  | Whrn       | INSIDE                 | 0.113                                           | 0.742                            | 3050.37             | 2264.25             | 0.084                            | 2223.68             | 186.60              |
| A_68_P22970878 | chr4:63156551-63156595                            | NM_001008791:413   | Whrn       | INSIDE                 | 0.397                                           | 0.613                            | 3917.18             | 2399.98             | 0.243                            | 2938.54             | 714.69              |
| A_68_P25728415 | chr8:26787130-26787174                            | NM_001081269:36397 | Whsc11     | INSIDE                 | 0.293                                           | 1.637                            | 516.31              | 845.41              | 0.479                            | 525.16              | 251.72              |
| A_68_P23591876 | chr5:34278835-34278879                            | NM_011914:51       | Whsc2      | INSIDE                 | 0.333                                           | 0.638                            | 1238.52             | 789.59              | 0.213                            | 1098.24             | 233.43              |
| A_68_P23591878 | chr5:34279071-34279115                            | NM_011914:-185     | Whsc2      | PROMOTER               | 0.647                                           | 0.718                            | 1656.32             | 1189.28             | 0.465                            | 1213.21             | 563.55              |
| A_68_P23591879 | chr5:34279139-34279183                            | NM_011914:-253     | Whsc2      | PROMOTER               | 0.148                                           | 0.534                            | 2089.38             | 1115.94             | 0.079                            | 1486.76             | 117.47              |
| A_68_P23591880 | chr5:34279319-34279363                            | NM_011914:-433     | Whsc2      | PROMOTER               | 0.274                                           | 0.496                            | 1170.62             | 580.93              | 0.136                            | 1024.26             | 139.05              |
| A_68_P27543029 | chr10:128185074-128185118                         | NM_001170869:-481  | Wibg       | PROMOTER               | 0.316                                           | 0.494                            | 1122.91             | 554.87              | 0.156                            | 771.19              | 120.26              |
| A_68_P21332187 | chr2:73367126-73367170                            | NM_153138:319      | Wipfl      | INSIDE                 | 0.575                                           | 0.654                            | 865.10              | 565.43              | 0.376                            | 827.83              | 311.21              |
| A_68_P21332193 | chr2:73367805-73367850                            | NM_153138:-360     | Wipfl      | PROMOTER               | 0.575                                           | 0.529                            | 1822.11             | 964.58              | 0.304                            | 1528.39             | 464.90              |
| A_68_P28119630 | chr11:109472954-109472998                         | NM_145940:-273     | Wipil      | PROMOTER               | 0.273                                           | 0.702                            | 9981.09             | 7006.85             | 0.192                            | 7927.89             | 1522.00             |
| A_68_P24152596 | chr5:143105941-143105985                          | NM_178398:425      | Wipi2      | INSIDE                 | 0.181                                           | 0.475                            | 1697.21             | 806.27              | 0.086                            | 1383.16             | 119.16              |
| A_68_P29023537 | chr13:49242028-49242072                           | NM_029361:1333     | Wnk2       | INSIDE                 | 0.493                                           | 0.553                            | 1026.73             | 567.95              | 0.273                            | 760.28              | 207.34              |
| A_68_P28072948 | chr11:101126562-101126606                         | NM_175638:4704     | Wnk4       | INSIDE                 | 0.463                                           | 0.619                            | 977.66              | 605.58              | 0.287                            | 880.52              | 252.40              |
| A_68_P28072950 | chr11:101126785-101126842                         | NM_175638:4933     | Wnk4       | INSIDE                 | 0.279                                           | 0.449                            | 1167.52             | 524.22              | 0.125                            | 943.22              | 118.08              |
| A_68_P30476456 | chr15:98619939-98619989                           | NM_021279:-323     | Wnt1       | PROMOTER               | 0.171                                           | 1.510                            | 678.62              | 1024.83             | 0.259                            | 452.29              | 117.00              |
| A_68_P30476457 | chr15:98620052-98620096                           | NM_021279:-213     | Wnt1       | PROMOTER               | 0.235                                           | 0.743                            | 3250.75             | 2414.27             | 0.175                            | 2345.77             | 409.61              |
| A_68_P30476474 | chr15:98622103-98622147                           | NM_021279:1837     | Wnt1       | INSIDE                 | 0.230                                           | 0.554                            | 1776.70             | 984.99              | 0.127                            | 1383.80             | 176.20              |
| A_68_P30476477 | chr15:98622390-98622434                           | NM_021279:2125     | Wnt1       | INSIDE                 | 0.168                                           | 0.584                            | 3621.06             | 2114.93             | 0.098                            | 2609.51             | 256.64              |
| A_68_P30476480 | chr15:98622772-98622816                           | NM_021279:2507     | Wnt1       | INSIDE                 | 0.244                                           | 2.247                            | 1342.39             | 3015.79             | 0.547                            | 940.63              | 514.86              |
| A_68_P30476370 | chr15:98602905-98602961                           | NM_011718:5649     | Wnt10b     | INSIDE                 | 0.658                                           | 0.648                            | 983.34              | 637.23              | 0.426                            | 799.76              | 340.80              |
| A_68_P30476373 | chr15:98603197-98603241                           | NM_011718:5363     | Wnt10b     | INSIDE                 | 0.274                                           | 0.531                            | 973.68              | 517.09              | 0.146                            | 820.13              | 119.40              |
| A_68_P30476409 | chr15:98608492-98608536                           | NM_011718:67       | Wnt10b     | INSIDE                 | 0.642                                           | 0.733                            | 1990.71             | 1460.02             | 0.471                            | 1581.59             | 744.93              |
| A_68_P30476411 | chr15:98608721-98608765                           | NM_011718:-161     | Wnt10b     | PROMOTER               | 0.440                                           | 0.662                            | 1704.65             | 1127.74             | 0.291                            | 1299.68             | 378.15              |
| A_68_P25358180 | chr7:105983274-105983321                          | NM_009519:-4057    | Wnt11      | PROMOTER               | 0.238                                           | 0.690                            | 1387.69             | 958.00              | 0.164                            | 1012.62             | 166.19              |

| ProbeName      | Target position of probe on CpG island microarray | TargetID           | GeneSymbol | CpG island Description | Ratio of relative methylation (TiO2-NP/Vehicle) | Sham group                       |                     |                     | TiO <sub>2</sub> -H group        |                     |                     |
|----------------|---------------------------------------------------|--------------------|------------|------------------------|-------------------------------------------------|----------------------------------|---------------------|---------------------|----------------------------------|---------------------|---------------------|
|                |                                                   |                    |            |                        |                                                 | Relative methylation (Cy-5/Cy-3) | Cy-3 signal (Input) | Cy-5 signal (MeDIP) | Relative methylation (Cy-5/Cy-3) | Cy-3 signal (Input) | Cy-5 signal (MeDIP) |
| A_68_P22394202 | chr3:104764921-104764965                          | NM_009520:-315     | Wnt2b      | PROMOTER               | 0.143                                           | 0.703                            | 1711.20             | 1202.13             | 0.101                            | 1180.85             | 118.91              |
| A_68_P22394204 | chr3:104765246-104765290                          | NM_009520:-641     | Wnt2b      | PROMOTER               | 0.172                                           | 0.649                            | 1303.97             | 846.77              | 0.112                            | 1058.28             | 118.00              |
| A_68_P28087055 | chr11:103635334-103635379                         | NM_009521:-132     | Wnt3       | PROMOTER               | 0.629                                           | 0.568                            | 1040.45             | 590.64              | 0.357                            | 884.95              | 316.13              |
| A_68_P28087056 | chr11:103635473-103635522                         | NM_009521:9        | Wnt3       | INSIDE                 | 0.155                                           | 0.606                            | 1689.48             | 1023.53             | 0.094                            | 1284.16             | 120.59              |
| A_68_P28087330 | chr11:103671857-103671901                         | NM_009521:36390    | Wnt3       | INSIDE                 | 0.579                                           | 0.650                            | 1416.30             | 921.02              | 0.377                            | 1132.06             | 426.34              |
| A_68_P28087340 | chr11:103672887-103672931                         | NM_009521:37420    | Wnt3       | INSIDE                 | 0.377                                           | 1.537                            | 5118.67             | 7865.00             | 0.580                            | 3885.97             | 2253.23             |
| A_68_P28087343 | chr11:103673531-103673575                         | NM_009521:38064    | Wnt3       | INSIDE                 | 0.670                                           | 4.641                            | 2433.84             | 11295.21            | 3.107                            | 1734.84             | 5390.88             |
| A_68_P27836025 | chr11:59103487-59103531                           | NM_009522:745      | Wnt3a      | INSIDE                 | 0.456                                           | 0.276                            | 2543.26             | 702.85              | 0.126                            | 2027.03             | 255.69              |
| A_68_P29493855 | chr14:29319194-29319238                           | NM_009524:558      | Wnt5a      | INSIDE                 | 0.335                                           | 0.439                            | 1319.01             | 578.59              | 0.147                            | 1027.20             | 150.84              |
| A_68_P29493860 | chr14:29319799-29319843                           | NM_009524:1162     | Wnt5a      | INSIDE                 | 0.131                                           | 0.700                            | 5111.08             | 3578.10             | 0.092                            | 3653.85             | 336.16              |
| A_68_P29493861 | chr14:29319923-29319970                           | NM_009524:1288     | Wnt5a      | INSIDE                 | 0.212                                           | 0.649                            | 1142.28             | 740.90              | 0.138                            | 884.44              | 121.88              |
| A_68_P30401337 | chr15:85374375-85374419                           | NM_001163634:34104 | Wnt7b      | INSIDE                 | 0.661                                           | 2.597                            | 787.40              | 2045.23             | 1.717                            | 678.17              | 1164.31             |
| A_68_P30401588 | chr15:85407657-85407702                           | NM_001163634:821   | Wnt7b      | INSIDE                 | 0.256                                           | 0.407                            | 1563.41             | 636.09              | 0.104                            | 1152.95             | 120.14              |
| A_68_P30401593 | chr15:85408317-85408361                           | NM_001163634:162   | Wnt7b      | INSIDE                 | 0.248                                           | 0.484                            | 1858.71             | 898.85              | 0.120                            | 1460.05             | 174.80              |
| A_68_P27836130 | chr11:59119814-59119858                           | NM_139298:-595     | Wnt9a      | PROMOTER               | 0.246                                           | 0.582                            | 1039.44             | 604.57              | 0.143                            | 836.70              | 119.79              |
| A_68_P30991292 | chr16:96367120-96367164                           | NM_207301:117      | Wrb        | INSIDE                 | 0.252                                           | 0.677                            | 2934.92             | 1987.61             | 0.171                            | 2052.27             | 350.11              |
| A_68_P28931376 | chr13:32893858-32893902                           | NM_030215:-18      | Wmip1      | PROMOTER               | 0.592                                           | 0.442                            | 1884.77             | 833.81              | 0.262                            | 1466.74             | 384.43              |
| A_68_P28931377 | chr13:32893930-32893974                           | NM_030215:54       | Wmip1      | INSIDE                 | 0.521                                           | 0.400                            | 1803.71             | 721.31              | 0.208                            | 1417.83             | 295.59              |
| A_68_P28931385 | chr13:32894778-32894822                           | NM_030215:902      | Wmip1      | INSIDE                 | 0.534                                           | 0.472                            | 1235.22             | 583.52              | 0.252                            | 899.07              | 226.98              |
| A_68_P28931386 | chr13:32894845-32894889                           | NM_030215:968      | Wmip1      | INSIDE                 | 0.203                                           | 0.404                            | 2034.57             | 821.24              | 0.082                            | 1543.77             | 126.66              |
| A_68_P28931387 | chr13:32894954-32894998                           | NM_030215:1078     | Wmip1      | INSIDE                 | 0.384                                           | 0.617                            | 1980.72             | 1221.55             | 0.237                            | 1549.04             | 367.09              |
| A_68_P28931388 | chr13:32895025-32895071                           | NM_030215:1150     | Wmip1      | INSIDE                 | 0.175                                           | 0.571                            | 1916.49             | 1094.34             | 0.100                            | 1294.07             | 129.40              |
| A_68_P27947945 | chr11:79068066-79068110                           | NM_019653:109      | Wsb1       | INSIDE                 | 0.259                                           | 0.695                            | 1869.44             | 1298.95             | 0.180                            | 1284.56             | 231.41              |
| A_68_P21492627 | chr2:104967572-104967616                          | NM_144783:909      | Wt1        | INSIDE                 | 0.283                                           | 0.572                            | 1330.60             | 761.18              | 0.162                            | 1090.85             | 176.72              |
| A_68_P31054974 | chr17:13185825-13185876                           | NM_175394:-445     | Wtap       | PROMOTER               | 0.204                                           | 0.600                            | 1131.54             | 679.26              | 0.122                            | 997.11              | 122.05              |
| A_68_P31054976 | chr17:13185515-13185559                           | NM_175394:-131     | Wtap       | PROMOTER               | 0.658                                           | 0.434                            | 1511.65             | 656.75              | 0.286                            | 1108.73             | 317.01              |
| A_68_P25042335 | chr7:34917422-34917466                            | NM_207212:843      | Wtip       | INSIDE                 | 0.285                                           | 0.712                            | 3656.96             | 2605.57             | 0.203                            | 2868.96             | 581.90              |
| A_68_P25042342 | chr7:34918494-34918538                            | NM_207212:-229     | Wtip       | PROMOTER               | 0.364                                           | 0.525                            | 2836.45             | 1489.36             | 0.191                            | 2244.05             | 429.00              |
| A_68_P26184809 | chr8:117045830-117045874                          | NM_019573:82301    | Wwox       | INSIDE                 | 0.644                                           | 2.694                            | 1201.00             | 3235.35             | 1.734                            | 870.81              | 1509.62             |
| A_68_P26184811 | chr8:117045980-117046026                          | NM_019573:82451    | Wwox       | INSIDE                 | 0.644                                           | 2.941                            | 853.03              | 2508.99             | 1.895                            | 616.44              | 1168.19             |
| A_68_P22164429 | chr3:57379088-57379132                            | NM_133784:688      | Wwtr1      | INSIDE                 | 0.253                                           | 0.664                            | 947.44              | 629.49              | 0.168                            | 774.59              | 130.00              |
| A_68_P22164435 | chr3:57379593-57379637                            | NM_133784:184      | Wwtr1      | INSIDE                 | 0.505                                           | 0.490                            | 1214.79             | 595.55              | 0.248                            | 1018.93             | 252.32              |
| A_68_P27563772 | chr11:5421438-5421482                             | NM_013842:491      | Xbp1       | INSIDE                 | 0.426                                           | 0.461                            | 1736.71             | 800.62              | 0.196                            | 1362.88             | 267.49              |
| A_68_P20002773 | chr1:3662046-3662090                              | NM_001011874:-489  | Xkr4       | PROMOTER               | 0.068                                           | 0.648                            | 3911.41             | 2534.36             | 0.044                            | 2772.36             | 121.88              |
| A_68_P20002775 | chr1:3662278-3662322                              | NM_001011874:-721  | Xkr4       | PROMOTER               | 0.233                                           | 0.536                            | 1206.69             | 647.03              | 0.125                            | 940.71              | 117.56              |
| A_68_P25701519 | chr8:18950799-18950843                            | NM_001113350:153   | Xkr5       | INSIDE                 | 0.295                                           | 0.550                            | 1900.50             | 1045.48             | 0.162                            | 1597.83             | 258.98              |
| A_68_P29662310 | chr14:64225813-64225857                           | NM_173393:468      | Xkr6       | INSIDE                 | 0.525                                           | 0.541                            | 2910.96             | 1575.77             | 0.284                            | 2322.28             | 659.56              |
| A_68_P22887518 | chr4:46209177-46209222                            | NM_011728:-16      | Xpa        | PROMOTER               | 0.268                                           | 0.601                            | 882.51              | 530.59              | 0.161                            | 745.71              | 120.32              |
| A_68_P22887519 | chr4:46209270-46209318                            | NM_011728:-111     | Xpa        | PROMOTER               | 0.391                                           | 0.602                            | 964.46              | 580.45              | 0.236                            | 743.18              | 175.04              |
| A_68_P30377738 | chr15:81230455-81230499                           | NM_177310:-141     | Xpnp3      | DIVERGENT_PROMOTER     | 0.425                                           | 0.585                            | 3206.19             | 1874.83             | 0.248                            | 2430.25             | 603.33              |
| A_68_P27644761 | chr11:23155625-23155669                           | NM_001035226:-394  | Xpo1       | PROMOTER               | 0.150                                           | 0.428                            | 2430.62             | 1040.22             | 0.064                            | 1822.87             | 116.67              |
| A_68_P25499299 | chr7:133343490-133343534                          | NM_028816:410      | Xpo6       | INSIDE                 | 0.535                                           | 0.735                            | 3441.86             | 2530.75             | 0.394                            | 2583.45             | 1016.96             |
| A_68_P29703308 | chr14:71165727-71165771                           | NM_023045:687      | Xpo7       | INSIDE                 | 0.398                                           | 0.702                            | 1752.43             | 1229.46             | 0.279                            | 1340.90             | 374.38              |
| A_68_P29703310 | chr14:71165976-71166021                           | NM_023045:437      | Xpo7       | INSIDE                 | 0.596                                           | 0.516                            | 1046.55             | 540.47              | 0.308                            | 816.33              | 251.35              |



| ProbeName      | Target position of probe on CpG island microarray | TargetID           | GeneSymbol | CpG island Description | Ratio of relative methylation (TiO2-NP/Vehicle) | Sham group                       |                     |                     | TiO <sub>2</sub> -H group        |                     |                     |
|----------------|---------------------------------------------------|--------------------|------------|------------------------|-------------------------------------------------|----------------------------------|---------------------|---------------------|----------------------------------|---------------------|---------------------|
|                |                                                   |                    |            |                        |                                                 | Relative methylation (Cy-5/Cy-3) | Cy-3 signal (Input) | Cy-5 signal (MeDIP) | Relative methylation (Cy-5/Cy-3) | Cy-3 signal (Input) | Cy-5 signal (MeDIP) |
| A_68_P27504460 | chr10:121043018-121043071                         | NM_001081056:20328 | Xpot       | INSIDE                 | 0.605                                           | 2.799                            | 725.45              | 2030.52             | 1.694                            | 566.97              | 960.58              |
| A_68_P23548555 | chr5:25211490-25211534                            | NM_020570:103      | Xrec2      | INSIDE                 | 0.556                                           | 0.450                            | 1279.43             | 575.45              | 0.250                            | 1054.18             | 263.46              |
| A_68_P28746254 | chr12:113052004-113052048                         | NM_028875:26       | Xrec3      | INSIDE                 | 0.402                                           | 0.647                            | 4008.98             | 2594.96             | 0.260                            | 3067.97             | 797.87              |
| A_68_P29211814 | chr13:90229104-90229154                           | NM_028012:85       | Xrec4      | INSIDE                 | 0.334                                           | 0.629                            | 1117.32             | 703.03              | 0.210                            | 843.60              | 177.21              |
| A_68_P30380963 | chr15:81846798-81846842                           | NM_010247:22       | Xrec6      | INSIDE                 | 0.246                                           | 0.470                            | 2002.64             | 941.12              | 0.116                            | 1437.61             | 166.13              |
| A_68_P26744825 | chr9:95854980-95855036                            | NM_011916:-170     | Xrm1       | PROMOTER               | 0.256                                           | 0.688                            | 1726.58             | 1187.18             | 0.176                            | 1312.62             | 231.39              |
| A_68_P26744827 | chr9:95855160-95855204                            | NM_011916:4        | Xrm1       | INSIDE                 | 0.204                                           | 0.648                            | 1124.55             | 728.52              | 0.132                            | 905.68              | 119.45              |
| A_68_P21721814 | chr2:146838725-146838769                          | NM_011917:-49      | Xrm2       | PROMOTER               | 0.622                                           | 0.549                            | 1238.50             | 679.61              | 0.342                            | 930.84              | 317.94              |
| A_68_P21721820 | chr2:146839259-146839303                          | NM_011917:485      | Xrm2       | INSIDE                 | 0.248                                           | 0.466                            | 1205.21             | 562.07              | 0.116                            | 1026.95             | 118.86              |
| A_68_P21721821 | chr2:146839369-146839413                          | NM_011917:595      | Xrm2       | INSIDE                 | 0.353                                           | 0.440                            | 1608.97             | 707.14              | 0.155                            | 1283.99             | 199.43              |
| A_68_P25364623 | chr7:107065859-107065903                          | NM_001164258:58153 | Xrra1      | INSIDE                 | 0.382                                           | 0.552                            | 1279.25             | 705.79              | 0.211                            | 1061.22             | 223.43              |
| A_68_P28034315 | chr11:94538289-94538333                           | NM_145828:497      | Xylt2      | INSIDE                 | 0.446                                           | 0.588                            | 3266.40             | 1920.22             | 0.262                            | 2479.69             | 650.03              |
| A_68_P26290457 | chr9:8004110-8004154                              | NM_001171147:464   | Yap1       | INSIDE                 | 0.327                                           | 0.634                            | 3063.78             | 1942.36             | 0.207                            | 2456.14             | 508.50              |
| A_68_P30568843 | chr16:16302936-16302980                           | NM_198246:-99      | Yars2      | PROMOTER               | 0.345                                           | 0.536                            | 1519.30             | 813.81              | 0.185                            | 1283.94             | 237.00              |
| A_68_P27898020 | chr11:69749025-69749069                           | NM_016875:-354     | Ybx2       | PROMOTER               | 0.550                                           | 0.566                            | 2117.23             | 1197.87             | 0.311                            | 1787.40             | 556.56              |
| A_68_P30572230 | chr16:17147040-17147084                           | NM_026940:3        | Ydjc       | INSIDE                 | 0.611                                           | 0.601                            | 883.12              | 530.49              | 0.367                            | 695.06              | 255.05              |
| A_68_P30572235 | chr16:17147510-17147562                           | NM_026940:477      | Ydjc       | INSIDE                 | 0.213                                           | 0.470                            | 1873.92             | 880.30              | 0.100                            | 1217.96             | 121.97              |
| A_68_P30572236 | chr16:17147632-17147677                           | NM_026940:595      | Ydjc       | INSIDE                 | 0.276                                           | 0.504                            | 1137.45             | 573.08              | 0.139                            | 826.87              | 115.16              |
| A_68_P27480106 | chr10:116661162-116661206                         | NM_026570:379      | Yeats4     | INSIDE                 | 0.362                                           | 0.398                            | 1735.68             | 690.14              | 0.144                            | 1541.08             | 221.81              |
| A_68_P23584758 | chr5:32913772-32913816                            | NM_001205132:251   | Yes1       | INSIDE                 | 0.423                                           | 0.343                            | 1952.00             | 669.02              | 0.145                            | 1562.07             | 226.56              |
| A_68_P31926817 | chr19:5088108-5088153                             | NM_026553:-407     | Yif1a      | DIVERGENT_PROMOTER     | 0.381                                           | 0.622                            | 1033.89             | 643.35              | 0.237                            | 751.85              | 178.03              |
| A_68_P25026074 | chr7:30023055-30023109                            | NM_001110201:-259  | Yif1b      | DIVERGENT_PROMOTER     | 0.126                                           | 0.731                            | 1790.00             | 1308.71             | 0.092                            | 1284.30             | 118.20              |
| A_68_P25026079 | chr7:30023546-30023590                            | NM_001110201:227   | Yif1b      | INSIDE                 | 0.228                                           | 0.623                            | 1092.98             | 680.64              | 0.142                            | 863.65              | 122.69              |
| A_68_P31644531 | chr18:40378658-40378702                           | NM_023311:373      | Yipf5      | INSIDE                 | 0.197                                           | 0.714                            | 2126.77             | 1517.65             | 0.141                            | 1486.92             | 209.42              |
| A_68_P31644532 | chr18:40378757-40378801                           | NM_023311:275      | Yipf5      | INSIDE                 | 0.163                                           | 1.778                            | 6506.46             | 11569.67            | 0.289                            | 4385.35             | 1267.87             |
| A_68_P31644533 | chr18:40378844-40378888                           | NM_023311:187      | Yipf5      | INSIDE                 | 0.054                                           | 1.878                            | 14054.89            | 26395.33            | 0.102                            | 8501.30             | 866.43              |
| A_68_P27565815 | chr11:5856146-5856195                             | NM_019661:410      | Ykt6       | INSIDE                 | 0.288                                           | 0.510                            | 1006.23             | 512.70              | 0.147                            | 829.23              | 121.49              |
| A_68_P27992046 | chr11:86806680-86806725                           | NM_001005341:562   | Ypel2      | INSIDE                 | 0.286                                           | 0.717                            | 2621.91             | 1881.13             | 0.205                            | 2013.03             | 413.64              |
| A_68_P27992047 | chr11:86806779-86806823                           | NM_001005341:464   | Ypel2      | INSIDE                 | 0.413                                           | 0.672                            | 4891.83             | 3288.84             | 0.278                            | 3710.47             | 1030.84             |
| A_68_P27992048 | chr11:86806873-86806917                           | NM_001005341:370   | Ypel2      | INSIDE                 | 0.276                                           | 0.558                            | 1442.28             | 804.89              | 0.154                            | 1067.92             | 164.24              |
| A_68_P23865421 | chr5:87233222-87233266                            | NM_177680:-270     | Ythdc1     | PROMOTER               | 0.303                                           | 0.584                            | 2462.73             | 1439.18             | 0.177                            | 1878.03             | 332.25              |
| A_68_P23865423 | chr5:87233404-87233448                            | NM_177680:-88      | Ythdc1     | PROMOTER               | 0.503                                           | 0.719                            | 1949.41             | 1400.99             | 0.362                            | 1550.02             | 560.57              |
| A_68_P31669248 | chr18:44988658-44988702                           | NM_001163013:362   | Ythdc2     | INSIDE                 | 0.567                                           | 0.428                            | 1645.12             | 704.73              | 0.243                            | 1200.46             | 291.34              |
| A_68_P31669249 | chr18:44988742-44988786                           | NM_001163013:446   | Ythdc2     | INSIDE                 | 0.141                                           | 0.709                            | 1587.57             | 1126.27             | 0.100                            | 1245.48             | 124.69              |
| A_68_P21907109 | chr2:180655229-180655273                          | NM_173761:391      | Ythdf1     | INSIDE                 | 0.579                                           | 0.732                            | 4037.06             | 2954.50             | 0.423                            | 3038.38             | 1286.42             |
| A_68_P21962519 | chr3:16083394-16083438                            | NM_001145919:234   | Ythdf3     | INSIDE                 | 0.498                                           | 0.479                            | 1491.03             | 713.64              | 0.238                            | 1208.42             | 287.88              |
| A_68_P27927819 | chr11:75547027-75547071                           | NM_009536:660      | Ywhae      | INSIDE                 | 0.199                                           | 0.574                            | 4961.05             | 2848.34             | 0.114                            | 3732.30             | 425.80              |
| A_68_P24118436 | chr5:136379600-136379644                          | NM_018871:30889    | Ywhag      | DOWNSTREAM             | 0.403                                           | 0.634                            | 1135.29             | 719.87              | 0.256                            | 915.76              | 234.26              |
| A_68_P24118491 | chr5:136387249-136387293                          | NM_018871:23241    | Ywhag      | INSIDE                 | 0.563                                           | 2.731                            | 1500.76             | 4098.78             | 1.538                            | 1042.21             | 1602.46             |
| A_68_P24118624 | chr5:136409884-136409928                          | NM_018871:605      | Ywhag      | INSIDE                 | 0.568                                           | 0.668                            | 3287.17             | 2196.31             | 0.380                            | 2580.55             | 979.53              |
| A_68_P23586719 | chr5:33362030-33362074                            | NM_011738:588      | Ywhah      | INSIDE                 | 0.592                                           | 0.440                            | 1903.90             | 837.08              | 0.260                            | 1523.40             | 396.55              |
| A_68_P28280594 | chr12:21423400-21423444                           | NM_011739:-125     | Ywhaq      | PROMOTER               | 0.599                                           | 0.456                            | 1720.19             | 783.97              | 0.273                            | 1289.76             | 351.84              |
| A_68_P28280595 | chr12:21423493-21423537                           | NM_011739:-217     | Ywhaq      | PROMOTER               | 0.488                                           | 0.524                            | 1861.72             | 976.25              | 0.256                            | 1439.01             | 368.48              |
| A_68_P28280597 | chr12:21423661-21423705                           | NM_011739:-385     | Ywhaq      | PROMOTER               | 0.142                                           | 0.515                            | 2174.82             | 1120.31             | 0.073                            | 1666.47             | 121.62              |

| ProbeName      | Target position of probe on CpG island microarray | TargetID          | GeneSymbol | CpG island Description | Ratio of relative methylation (TiO2-NP/Vehicle) | Sham group                       |                     |                     | TiO <sub>2</sub> -H group        |                     |                     |
|----------------|---------------------------------------------------|-------------------|------------|------------------------|-------------------------------------------------|----------------------------------|---------------------|---------------------|----------------------------------|---------------------|---------------------|
|                |                                                   |                   |            |                        |                                                 | Relative methylation (Cy-5/Cy-3) | Cy-3 signal (Input) | Cy-5 signal (MeDIP) | Relative methylation (Cy-5/Cy-3) | Cy-3 signal (Input) | Cy-5 signal (MeDIP) |
| A_68_P30140504 | chr15:36723408-36723452                           | NM_011740:863     | Ywhaz      | INSIDE                 | 0.225                                           | 0.498                            | 2368.50             | 1179.93             | 0.112                            | 1691.16             | 189.74              |
| A_68_P30140507 | chr15:36723784-36723828                           | NM_011740:487     | Ywhaz      | INSIDE                 | 0.274                                           | 0.637                            | 810.77              | 516.51              | 0.175                            | 688.21              | 120.32              |
| A_68_P28729922 | chr12:110031214-110031258                         | NM_009537:-284    | Yy1        | PROMOTER               | 0.500                                           | 0.706                            | 3619.11             | 2555.48             | 0.353                            | 2766.67             | 976.39              |
| A_68_P28729928 | chr12:110032252-110032296                         | NM_009537:754     | Yy1        | INSIDE                 | 0.078                                           | 0.702                            | 3053.77             | 2143.40             | 0.054                            | 2223.67             | 121.00              |
| A_68_P31886106 | chr18:84257584-84257628                           | NM_146090:57      | Zadh2      | INSIDE                 | 0.394                                           | 0.377                            | 3025.06             | 1141.33             | 0.149                            | 2306.11             | 342.56              |
| A_68_P31886140 | chr18:84261455-84261501                           | NM_146090:3929    | Zadh2      | INSIDE                 | 0.190                                           | 0.706                            | 1682.30             | 1187.94             | 0.134                            | 1350.96             | 181.01              |
| A_68_P29240034 | chr13:96094965-96095009                           | NM_028106:-205    | Zbed3      | PROMOTER               | 0.277                                           | 0.450                            | 1360.48             | 611.58              | 0.124                            | 1094.16             | 136.16              |
| A_68_P30421093 | chr15:88582624-88582670                           | NM_181412:506     | Zbed4      | INSIDE                 | 0.223                                           | 0.526                            | 1384.33             | 728.62              | 0.117                            | 1044.77             | 122.49              |
| A_68_P28553596 | chr12:77471058-77471102                           | NM_178744:-172    | Zbtb1      | DIVERGENT_PROMOTER     | 0.409                                           | 0.552                            | 2284.85             | 1261.68             | 0.226                            | 1750.16             | 395.07              |
| A_68_P30778633 | chr16:55973743-55973787                           | NM_173026:-152    | Zbtb11     | PROMOTER               | 0.338                                           | 0.639                            | 1822.62             | 1164.11             | 0.216                            | 1614.97             | 348.49              |
| A_68_P31156341 | chr17:35031034-35031078                           | NM_198886:-447    | Zbtb12     | PROMOTER               | 0.474                                           | 0.628                            | 960.50              | 602.87              | 0.297                            | 786.37              | 233.74              |
| A_68_P26494148 | chr9:48643704-48643758                            | NM_001033324:320  | Zbtb16     | INSIDE                 | 0.185                                           | 0.589                            | 1411.78             | 832.08              | 0.109                            | 1080.11             | 117.65              |
| A_68_P26494154 | chr9:48644306-48644350                            | NM_001033324:-278 | Zbtb16     | PROMOTER               | 0.545                                           | 0.533                            | 1469.34             | 782.75              | 0.291                            | 1137.61             | 330.51              |
| A_68_P23364201 | chr4:141020235-141020279                          | NM_009541:19669   | Zbtb17     | INSIDE                 | 0.575                                           | 2.984                            | 2071.46             | 6182.02             | 1.717                            | 1603.27             | 2752.63             |
| A_68_P21121521 | chr2:33286475-33286519                            | NM_001085507:348  | Zbtb34     | INSIDE                 | 0.503                                           | 0.511                            | 1156.35             | 591.23              | 0.257                            | 874.47              | 224.73              |
| A_68_P27896952 | chr11:69579759-69579803                           | NM_029348:367     | Zbtb4      | INSIDE                 | 0.334                                           | 0.685                            | 1333.10             | 913.29              | 0.229                            | 1059.80             | 242.41              |
| A_68_P20662734 | chr1:141319149-141319193                          | NM_172643:211     | Zbtb41     | INSIDE                 | 0.349                                           | 0.476                            | 1372.99             | 652.86              | 0.166                            | 1054.20             | 175.15              |
| A_68_P28751782 | chr12:113917645-113917689                         | NM_001100460:616  | Zbtb42     | INSIDE                 | 0.506                                           | 0.733                            | 2166.76             | 1587.69             | 0.371                            | 1635.97             | 606.63              |
| A_68_P28751784 | chr12:113917844-113917888                         | NM_001100460:816  | Zbtb42     | INSIDE                 | 0.284                                           | 0.714                            | 2093.79             | 1494.32             | 0.202                            | 1495.49             | 302.64              |
| A_68_P21121777 | chr2:33324228-33324287                            | NM_001025594:-205 | Zbtb43     | PROMOTER               | 0.286                                           | 0.607                            | 860.01              | 521.62              | 0.174                            | 684.62              | 118.83              |
| A_68_P24974109 | chr7:13593102-13593146                            | NM_001024699:2025 | Zbtb45     | INSIDE                 | 0.455                                           | 4.787                            | 1387.92             | 6643.87             | 2.179                            | 1483.31             | 3232.05             |
| A_68_P24974124 | chr7:13594887-13594931                            | NM_001024699:241  | Zbtb45     | INSIDE                 | 0.392                                           | 1.550                            | 8940.84             | 13859.75            | 0.607                            | 5657.47             | 3435.24             |
| A_68_P24974125 | chr7:13594994-13595038                            | NM_001024699:133  | Zbtb45     | INSIDE                 | 0.473                                           | 1.355                            | 3694.32             | 5006.44             | 0.640                            | 2654.12             | 1699.85             |
| A_68_P24974126 | chr7:13595184-13595228                            | NM_001024699:-57  | Zbtb45     | PROMOTER               | 0.634                                           | 0.606                            | 1005.90             | 609.91              | 0.384                            | 753.09              | 289.51              |
| A_68_P24974127 | chr7:13595301-13595345                            | NM_001024699:-173 | Zbtb45     | PROMOTER               | 0.383                                           | 0.567                            | 2246.83             | 1274.90             | 0.217                            | 1400.51             | 304.31              |
| A_68_P21910759 | chr2:181195175-181195219                          | NM_028125:-1065   | Zbtb46     | PROMOTER               | 0.251                                           | 0.383                            | 1798.01             | 688.86              | 0.096                            | 1403.35             | 135.02              |
| A_68_P23618267 | chr5:38611613-38611657                            | NM_029162:33      | Zbtb49     | INSIDE                 | 0.564                                           | 0.467                            | 1488.70             | 695.63              | 0.264                            | 1235.93             | 325.87              |
| A_68_P27287608 | chr10:80598003-80598047                           | NM_010731:-991    | Zbtb7a     | PROMOTER               | 0.200                                           | 0.470                            | 1658.99             | 779.85              | 0.094                            | 1258.52             | 118.28              |
| A_68_P27287609 | chr10:80598116-80598160                           | NM_010731:-877    | Zbtb7a     | PROMOTER               | 0.283                                           | 0.701                            | 1844.23             | 1292.99             | 0.198                            | 1148.37             | 227.51              |
| A_68_P27287622 | chr10:80599571-80599615                           | NM_010731:577     | Zbtb7a     | INSIDE                 | 0.303                                           | 0.454                            | 1161.77             | 527.20              | 0.137                            | 874.92              | 120.18              |
| A_68_P22319094 | chr3:89195751-89195795                            | NM_009565:1353    | Zbtb7b     | INSIDE                 | 0.412                                           | 0.477                            | 1482.92             | 707.26              | 0.196                            | 1153.77             | 226.49              |
| A_68_P22319099 | chr3:89196394-89196438                            | NM_009565:709     | Zbtb7b     | INSIDE                 | 0.217                                           | 0.461                            | 1592.61             | 734.56              | 0.100                            | 1281.94             | 128.06              |
| A_68_P22319130 | chr3:89199983-89200027                            | NM_009565:-2879   | Zbtb7b     | PROMOTER               | 0.097                                           | 1.370                            | 3604.55             | 4939.84             | 0.132                            | 2314.19             | 306.42              |
| A_68_P31840894 | chr18:76219449-76219494                           | NM_145356:239640  | Zbtb7c     | INSIDE                 | 0.244                                           | 0.543                            | 1301.60             | 707.11              | 0.133                            | 914.90              | 121.46              |
| A_68_P23296400 | chr4:129054411-129054455                          | NM_028603:840     | Zbtb8a     | INSIDE                 | 0.136                                           | 0.622                            | 4062.61             | 2525.45             | 0.085                            | 3035.03             | 257.52              |
| A_68_P23296404 | chr4:129055173-129055217                          | NM_028603:78      | Zbtb8a     | INSIDE                 | 0.368                                           | 0.554                            | 1797.67             | 995.39              | 0.204                            | 1518.39             | 309.05              |
| A_68_P31113562 | chr17:27109927-27109971                           | NM_001005916:-175 | Zbtb9      | PROMOTER               | 0.643                                           | 0.410                            | 1334.08             | 547.14              | 0.264                            | 1046.96             | 276.11              |
| A_68_P27541962 | chr10:127984459-127984503                         | NM_134003:320     | Zc3h10     | INSIDE                 | 0.402                                           | 0.565                            | 1308.93             | 738.91              | 0.227                            | 1006.35             | 228.22              |
| A_68_P27541963 | chr10:127984584-127984628                         | NM_134003:194     | Zc3h10     | INSIDE                 | 0.172                                           | 1.435                            | 2103.89             | 3018.19             | 0.247                            | 1405.73             | 346.62              |
| A_68_P32542578 | chrX:92907030-92907074                            | NM_001034907:36   | Zc3h12b    | INSIDE                 | 0.566                                           | 2.857                            | 1730.47             | 4944.09             | 1.617                            | 835.50              | 1351.21             |
| A_68_P21388692 | chr2:83484476-83484520                            | NM_026934:-236    | Zc3h15     | PROMOTER               | 0.469                                           | 0.602                            | 1674.83             | 1008.09             | 0.282                            | 1220.88             | 344.55              |
| A_68_P26232972 | chr8:124900602-124900646                          | NM_001029993:109  | Zc3h18     | INSIDE                 | 0.442                                           | 0.388                            | 1718.34             | 666.76              | 0.171                            | 1401.42             | 240.18              |
| A_68_P30344504 | chr15:75672213-75672257                           | NM_172121:104     | Zc3h3      | INSIDE                 | 0.644                                           | 0.488                            | 1641.17             | 800.63              | 0.314                            | 1138.16             | 357.45              |
| A_68_P30344506 | chr15:75672397-75672441                           | NM_172121:-80     | Zc3h3      | PROMOTER               | 0.624                                           | 0.469                            | 1120.24             | 524.92              | 0.292                            | 858.42              | 250.86              |

| ProbeName      | Target position of probe on CpG island microarray | TargetID          | GeneSymbol | CpG island Description | Ratio of relative methylation (TiO2-NP/Vehicle) | Sham group                       |                     |                     | TiO <sub>2</sub> -H group        |                     |                     |
|----------------|---------------------------------------------------|-------------------|------------|------------------------|-------------------------------------------------|----------------------------------|---------------------|---------------------|----------------------------------|---------------------|---------------------|
|                |                                                   |                   |            |                        |                                                 | Relative methylation (Cy-5/Cy-3) | Cy-3 signal (Input) | Cy-5 signal (MeDIP) | Relative methylation (Cy-5/Cy-3) | Cy-3 signal (Input) | Cy-5 signal (MeDIP) |
| A_68_P30344507 | chr15:75672464-75672508                           | NM_172121:-148    | Zc3h3      | PROMOTER               | 0.273                                           | 0.426                            | 1350.14             | 574.93              | 0.116                            | 1049.25             | 121.93              |
| A_68_P24981256 | chr7:16985178-16985232                            | NM_198631:-1340   | Zc3h4      | PROMOTER               | 0.318                                           | 0.373                            | 1449.53             | 540.10              | 0.118                            | 1015.44             | 120.28              |
| A_68_P21622285 | chr2:128793081-128793125                          | NM_178404:-35     | Zc3h6      | PROMOTER               | 0.494                                           | 0.506                            | 1903.96             | 964.00              | 0.250                            | 1312.20             | 328.14              |
| A_68_P21622286 | chr2:128793161-128793205                          | NM_178404:45      | Zc3h6      | INSIDE                 | 0.384                                           | 0.683                            | 1457.58             | 995.55              | 0.262                            | 1061.84             | 278.46              |
| A_68_P30546657 | chr16:11175989-11176033                           | NM_145931:476     | Zc3h7a     | INSIDE                 | 0.205                                           | 0.644                            | 2402.16             | 1546.32             | 0.132                            | 1818.70             | 240.31              |
| A_68_P30546660 | chr16:11176366-11176410                           | NM_145931:98      | Zc3h7a     | INSIDE                 | 0.412                                           | 0.489                            | 1495.01             | 730.64              | 0.201                            | 1359.83             | 273.69              |
| A_68_P21622217 | chr2:128769546-128769590                          | NM_020594:188     | Zc3h8      | INSIDE                 | 0.404                                           | 0.554                            | 1092.21             | 605.07              | 0.224                            | 984.96              | 220.62              |
| A_68_P24376836 | chr6:38304039-38304083                            | NM_028421:543     | Zc3hav1    | INSIDE                 | 0.198                                           | 0.594                            | 1904.89             | 1132.26             | 0.118                            | 1492.70             | 175.90              |
| A_68_P24376841 | chr6:38304658-38304702                            | NM_028421:-77     | Zc3hav1    | PROMOTER               | 0.268                                           | 0.419                            | 1499.53             | 628.88              | 0.112                            | 1192.29             | 134.02              |
| A_68_P27804179 | chr11:53138214-53138260                           | NM_026479:46      | Zcche10    | INSIDE                 | 0.297                                           | 0.393                            | 1423.03             | 559.29              | 0.117                            | 1016.64             | 118.57              |
| A_68_P27804180 | chr11:53138329-53138380                           | NM_026479:164     | Zcche10    | INSIDE                 | 0.181                                           | 0.432                            | 2399.18             | 1036.96             | 0.078                            | 1702.79             | 133.06              |
| A_68_P23196088 | chr4:108131810-108131854                          | NM_175472:-198    | Zcche11    | PROMOTER               | 0.314                                           | 0.516                            | 1517.11             | 783.36              | 0.162                            | 1236.15             | 200.63              |
| A_68_P23196100 | chr4:108133295-108133339                          | NM_175472:1286    | Zcche11    | INSIDE                 | 0.414                                           | 0.646                            | 1484.72             | 958.90              | 0.267                            | 1125.04             | 300.94              |
| A_68_P26228075 | chr8:124175832-124175876                          | NM_080855:-21     | Zcche14    | PROMOTER               | 0.343                                           | 0.463                            | 2103.87             | 975.09              | 0.159                            | 1537.21             | 244.55              |
| A_68_P26228083 | chr8:124177031-124177079                          | NM_080855:-1221   | Zcche14    | PROMOTER               | 0.290                                           | 0.456                            | 1346.16             | 613.25              | 0.132                            | 940.16              | 124.30              |
| A_68_P20505868 | chr1:107886770-107886814                          | NM_001122675:-190 | Zcche2     | PROMOTER               | 0.327                                           | 0.533                            | 1625.06             | 865.63              | 0.174                            | 1208.30             | 210.16              |
| A_68_P21749217 | chr2:152239906-152239950                          | NM_175126:852     | Zcche3     | INSIDE                 | 0.343                                           | 0.609                            | 1741.48             | 1060.96             | 0.209                            | 1346.73             | 281.21              |
| A_68_P21749218 | chr2:152239987-152240031                          | NM_175126:772     | Zcche3     | INSIDE                 | 0.295                                           | 0.353                            | 1958.83             | 690.72              | 0.104                            | 1453.63             | 151.39              |
| A_68_P21749219 | chr2:152240057-152240101                          | NM_175126:702     | Zcche3     | INSIDE                 | 0.606                                           | 0.611                            | 1622.07             | 991.19              | 0.370                            | 1373.36             | 508.34              |
| A_68_P29081868 | chr13:59923934-59923978                           | NM_153538:552     | Zcche6     | INSIDE                 | 0.371                                           | 0.380                            | 2426.51             | 922.15              | 0.141                            | 2050.26             | 289.17              |
| A_68_P22878935 | chr4:44769408-44769452                            | NM_138590:0       | Zcche7     | INSIDE                 | 0.270                                           | 0.432                            | 1307.13             | 564.76              | 0.117                            | 1023.21             | 119.21              |
| A_68_P24057205 | chr5:124170298-124170343                          | NM_027494:733     | Zcche8     | INSIDE                 | 0.441                                           | 0.346                            | 2295.83             | 793.54              | 0.153                            | 1866.38             | 284.69              |
| A_68_P24057206 | chr5:124170389-124170437                          | NM_027494:641     | Zcche8     | INSIDE                 | 0.238                                           | 0.470                            | 1373.75             | 645.48              | 0.112                            | 1055.47             | 117.79              |
| A_68_P24057208 | chr5:124170620-124170665                          | NM_027494:411     | Zcche8     | INSIDE                 | 0.239                                           | 0.479                            | 1258.50             | 602.59              | 0.115                            | 1007.44             | 115.37              |
| A_68_P29220644 | chr13:91947270-91947314                           | NM_145453:9       | Zcche9     | INSIDE                 | 0.636                                           | 0.501                            | 1717.52             | 860.32              | 0.319                            | 1415.02             | 450.99              |
| A_68_P21101316 | chr2:29949011-29949055                            | NM_001037762:123  | Zdhhc12    | INSIDE                 | 0.290                                           | 0.613                            | 1506.51             | 923.59              | 0.178                            | 1068.77             | 190.18              |
| A_68_P25108145 | chr7:56044314-56044358                            | NM_028031:-36     | Zdhhc13    | PROMOTER               | 0.222                                           | 0.662                            | 2869.26             | 1900.27             | 0.147                            | 2287.55             | 336.69              |
| A_68_P32578102 | chrX:101865933-101865986                          | NM_175358:444     | Zdhhc15    | INSIDE                 | 0.113                                           | 1.649                            | 1438.59             | 2372.71             | 0.187                            | 669.18              | 125.04              |
| A_68_P32578103 | chrX:101866009-101866059                          | NM_175358:369     | Zdhhc15    | INSIDE                 | 0.055                                           | 2.727                            | 2259.62             | 6162.57             | 0.149                            | 806.45              | 120.13              |
| A_68_P23318625 | chr4:133189081-133189125                          | NM_001017968:242  | Zdhhc18    | INSIDE                 | 0.591                                           | 0.727                            | 1867.74             | 1358.58             | 0.430                            | 1424.77             | 612.52              |
| A_68_P29630483 | chr14:58509439-58509485                           | NM_029492:-363    | Zdhhc20    | PROMOTER               | 0.179                                           | 1.573                            | 650.04              | 1022.74             | 0.282                            | 553.45              | 156.16              |
| A_68_P23059228 | chr4:82505265-82505309                            | NM_026647:279     | Zdhhc21    | INSIDE                 | 0.594                                           | 0.362                            | 1506.93             | 545.23              | 0.215                            | 1274.73             | 273.96              |
| A_68_P31925602 | chr19:4878554-4878607                             | NM_001168516:-87  | Zdhhc24    | DIVERGENT_PROMOTER     | 0.280                                           | 0.366                            | 1495.19             | 546.60              | 0.102                            | 1195.49             | 122.29              |
| A_68_P24156072 | chr5:144090683-144090727                          | NM_028379:201     | Zdhhc4     | INSIDE                 | 0.300                                           | 0.663                            | 2941.05             | 1949.64             | 0.199                            | 1987.61             | 394.70              |
| A_68_P24156073 | chr5:144090815-144090859                          | NM_028379:69      | Zdhhc4     | INSIDE                 | 0.577                                           | 0.577                            | 3562.81             | 2054.34             | 0.333                            | 3003.39             | 999.47              |
| A_68_P21394205 | chr2:84554801-84554845                            | NM_144887:499     | Zdhhc5     | INSIDE                 | 0.401                                           | 0.723                            | 2712.89             | 1962.11             | 0.290                            | 2037.85             | 590.93              |
| A_68_P21394211 | chr2:84555629-84555673                            | NM_144887:-329    | Zdhhc5     | PROMOTER               | 0.341                                           | 0.439                            | 4734.44             | 2076.53             | 0.150                            | 3532.02             | 528.54              |
| A_68_P26217896 | chr8:122625507-122625560                          | NM_133967:-161    | Zdhhc7     | PROMOTER               | 0.305                                           | 0.442                            | 1251.84             | 553.33              | 0.135                            | 997.37              | 134.37              |
| A_68_P30578493 | chr16:18234733-18234777                           | NM_172151:475     | Zdhhc8     | INSIDE                 | 0.195                                           | 0.653                            | 1295.80             | 845.62              | 0.127                            | 898.37              | 114.44              |
| A_68_P31469352 | chr18:5591749-5591796                             | NM_011546:-116    | Zeb1       | PROMOTER               | 0.364                                           | 0.627                            | 1055.27             | 661.74              | 0.228                            | 870.77              | 198.86              |
| A_68_P24135897 | chr5:139960495-139960539                          | NM_001159908:-71  | Zfand2a    | PROMOTER               | 0.329                                           | 0.677                            | 1149.23             | 777.68              | 0.223                            | 972.75              | 216.67              |
| A_68_P20352371 | chr1:75165078-75165131                            | NM_001159905:-115 | Zfand2b    | PROMOTER               | 0.302                                           | 0.425                            | 1698.12             | 721.94              | 0.128                            | 1230.07             | 157.78              |
| A_68_P31131059 | chr17:30141179-30141223                           | NM_148926:-831    | Zfand3     | PROMOTER               | 0.152                                           | 0.563                            | 1954.31             | 1101.06             | 0.086                            | 1466.94             | 125.93              |
| A_68_P31131060 | chr17:30141259-30141303                           | NM_148926:-751    | Zfand3     | PROMOTER               | 0.321                                           | 0.624                            | 1409.90             | 879.83              | 0.200                            | 1049.12             | 209.91              |

| ProbeName      | Target position of probe on CpG island microarray | TargetID           | GeneSymbol | CpG island Description | Ratio of relative methylation (TiO2-NP/Vehicle) | Sham group                       |                     |                     | TiO <sub>2</sub> -H group        |                     |                     |
|----------------|---------------------------------------------------|--------------------|------------|------------------------|-------------------------------------------------|----------------------------------|---------------------|---------------------|----------------------------------|---------------------|---------------------|
|                |                                                   |                    |            |                        |                                                 | Relative methylation (Cy-5/Cy-3) | Cy-3 signal (Input) | Cy-5 signal (MeDIP) | Relative methylation (Cy-5/Cy-3) | Cy-3 signal (Input) | Cy-5 signal (MeDIP) |
| A_68_P27469300 | chr10:114821835-114821879                         | NM_001033261:-158  | Zfc3h1     | DIVERGENT_PROMOTER     | 0.174                                           | 0.588                            | 1675.89             | 985.64              | 0.102                            | 1184.83             | 121.21              |
| A_68_P27469304 | chr10:114822217-114822261                         | NM_001033261:224   | Zfc3h1     | INSIDE                 | 0.569                                           | 0.723                            | 1971.17             | 1424.91             | 0.411                            | 1642.50             | 675.30              |
| A_68_P29616217 | chr14:55710378-55710422                           | NM_001039198:485   | Zfx2       | INSIDE                 | 0.257                                           | 0.671                            | 3657.23             | 2453.69             | 0.173                            | 2586.56             | 446.60              |
| A_68_P26152538 | chr8:111238302-111238346                          | NM_007496:-219     | Zfx3       | PROMOTER               | 0.595                                           | 0.679                            | 1081.35             | 734.45              | 0.404                            | 944.21              | 381.59              |
| A_68_P26152542 | chr8:111238708-111238758                          | NM_007496:189      | Zfx3       | INSIDE                 | 0.042                                           | 1.352                            | 3471.69             | 4694.99             | 0.057                            | 2100.28             | 120.40              |
| A_68_P24129051 | chr5:138596643-138596687                          | NM_019747:308      | Zfp113     | INSIDE                 | 0.252                                           | 0.542                            | 1896.16             | 1027.19             | 0.137                            | 1377.73             | 188.16              |
| A_68_P24129053 | chr5:138596838-138596882                          | NM_019747:112      | Zfp113     | INSIDE                 | 0.581                                           | 0.696                            | 1327.08             | 923.33              | 0.404                            | 1009.66             | 407.96              |
| A_68_P24155561 | chr5:143997211-143997255                          | NM_177681:346      | Zfp12      | INSIDE                 | 0.552                                           | 0.717                            | 2810.31             | 2014.94             | 0.396                            | 2164.43             | 857.11              |
| A_68_P31092534 | chr17:23729724-23729768                           | NM_011747:6708     | Zfp13      | INSIDE                 | 0.388                                           | 0.519                            | 1338.86             | 695.11              | 0.201                            | 1137.36             | 229.06              |
| A_68_P25029683 | chr7:30836003-30836047                            | NM_011748:391      | Zfp14      | INSIDE                 | 0.565                                           | 0.643                            | 1081.36             | 695.68              | 0.364                            | 755.83              | 274.92              |
| A_68_P20349425 | chr1:74634360-74634404                            | NM_029888:220      | Zfp142     | INSIDE                 | 0.617                                           | 0.449                            | 2720.49             | 1222.32             | 0.277                            | 2035.70             | 564.19              |
| A_68_P25411540 | chr7:117204605-117204649                          | NM_009281:-589     | Zfp143     | PROMOTER               | 0.256                                           | 0.524                            | 1155.24             | 605.15              | 0.134                            | 899.50              | 120.40              |
| A_68_P25411544 | chr7:117205106-117205158                          | NM_009281:-83      | Zfp143     | PROMOTER               | 0.048                                           | 1.934                            | 1882.54             | 3640.72             | 0.092                            | 1349.52             | 124.02              |
| A_68_P25411546 | chr7:117205275-117205334                          | NM_009281:89       | Zfp143     | INSIDE                 | 0.110                                           | 2.701                            | 481.41              | 1300.06             | 0.298                            | 390.63              | 116.42              |
| A_68_P30657579 | chr16:33381453-33381497                           | NM_011749:614      | Zfp148     | INSIDE                 | 0.542                                           | 0.588                            | 1881.85             | 1107.05             | 0.319                            | 1357.88             | 432.86              |
| A_68_P24130229 | chr5:138882742-138882786                          | NM_028130:61       | Zfp157     | INSIDE                 | 0.191                                           | 0.575                            | 1298.43             | 746.98              | 0.110                            | 1082.33             | 119.03              |
| A_68_P24130230 | chr5:138882841-138882885                          | NM_028130:159      | Zfp157     | INSIDE                 | 0.302                                           | 0.705                            | 1946.79             | 1372.41             | 0.213                            | 1620.02             | 345.40              |
| A_68_P24130232 | chr5:138883088-138883132                          | NM_028130:407      | Zfp157     | INSIDE                 | 0.638                                           | 0.559                            | 1125.68             | 628.75              | 0.356                            | 895.87              | 319.00              |
| A_68_P31323658 | chr17:69731780-69731824                           | NM_009547:-1515    | Zfp161     | PROMOTER               | 0.238                                           | 0.587                            | 1532.71             | 899.39              | 0.140                            | 1122.30             | 156.80              |
| A_68_P31323669 | chr17:69733337-69733381                           | NM_009547:41       | Zfp161     | INSIDE                 | 0.163                                           | 0.592                            | 1683.35             | 996.60              | 0.096                            | 1209.57             | 116.53              |
| A_68_P31323661 | chr17:69732210-69732254                           | NM_009547:-1085    | Zfp161     | PROMOTER               | 0.669                                           | 0.661                            | 1152.64             | 761.38              | 0.442                            | 970.05              | 428.87              |
| A_68_P26891988 | chr9:122812318-122812362                          | NM_001177505:14752 | Zfp167     | DOWNSTREAM             | 0.346                                           | 0.693                            | 1775.77             | 1230.14             | 0.240                            | 1231.48             | 295.22              |
| A_68_P26891990 | chr9:122812568-122812612                          | NM_001177505:15002 | Zfp167     | DOWNSTREAM             | 0.342                                           | 0.659                            | 1992.99             | 1312.63             | 0.226                            | 1603.40             | 361.64              |
| A_68_P29019863 | chr13:48608843-48608887                           | NM_001164576:-59   | Zfp169     | PROMOTER               | 0.621                                           | 0.678                            | 1016.38             | 688.98              | 0.421                            | 884.39              | 372.36              |
| A_68_P32460116 | chrX:70232552-70232596                            | NM_001109043:-103  | Zfp185     | PROMOTER               | 0.084                                           | 1.652                            | 2553.62             | 4219.84             | 0.138                            | 1147.58             | 158.86              |
| A_68_P22905511 | chr4:49534082-49534127                            | NM_145547:16       | Zfp189     | INSIDE                 | 0.375                                           | 0.545                            | 1540.35             | 838.91              | 0.204                            | 1299.90             | 265.54              |
| A_68_P31092273 | chr17:23684002-23684046                           | NM_001033496:17169 | Zfp213     | DOWNSTREAM             | 0.254                                           | 0.524                            | 1933.43             | 1012.25             | 0.133                            | 1395.18             | 185.18              |
| A_68_P31092274 | chr17:23684082-23684126                           | NM_001033496:17089 | Zfp213     | DOWNSTREAM             | 0.605                                           | 0.578                            | 1127.59             | 651.49              | 0.349                            | 909.99              | 317.95              |
| A_68_P31092275 | chr17:23684173-23684217                           | NM_001033496:16999 | Zfp213     | DOWNSTREAM             | 0.438                                           | 0.694                            | 1466.01             | 1017.79             | 0.304                            | 1135.55             | 345.69              |
| A_68_P31092406 | chr17:23701243-23701288                           | NM_001033496:-72   | Zfp213     | PROMOTER               | 0.215                                           | 0.467                            | 1510.69             | 705.92              | 0.100                            | 1222.53             | 122.54              |
| A_68_P21851437 | chr2:169959061-169959105                          | NM_001033299:-2362 | Zfp217     | PROMOTER               | 0.199                                           | 0.543                            | 1373.10             | 745.41              | 0.108                            | 1100.18             | 118.92              |
| A_68_P21851439 | chr2:169959243-169959287                          | NM_001033299:-2544 | Zfp217     | PROMOTER               | 0.426                                           | 0.618                            | 1178.79             | 728.96              | 0.264                            | 949.40              | 250.32              |
| A_68_P24786878 | chr6:118405236-118405280                          | NM_028335:266      | Zfp248     | INSIDE                 | 0.380                                           | 0.605                            | 1310.10             | 791.99              | 0.230                            | 973.42              | 223.41              |
| A_68_P30350970 | chr15:76701410-76701454                           | NM_001007568:433   | Zfp251     | INSIDE                 | 0.581                                           | 0.542                            | 1337.07             | 724.17              | 0.315                            | 1079.66             | 339.70              |
| A_68_P30350971 | chr15:76701517-76701566                           | NM_001007568:324   | Zfp251     | INSIDE                 | 0.460                                           | 0.482                            | 1470.61             | 708.58              | 0.222                            | 1068.10             | 236.65              |
| A_68_P26478900 | chr9:46081259-46081303                            | NM_011752:134      | Zfp259     | INSIDE                 | 0.370                                           | 0.476                            | 1359.42             | 646.66              | 0.176                            | 1243.16             | 218.91              |
| A_68_P26342513 | chr9:20264224-20264268                            | NM_011753:358      | Zfp26      | INSIDE                 | 0.456                                           | 0.465                            | 1580.60             | 735.40              | 0.212                            | 1286.51             | 272.85              |
| A_68_P30506408 | chr16:3744081-3744125                             | NM_148924:4        | Zfp263     | INSIDE                 | 0.171                                           | 0.548                            | 2998.60             | 1643.21             | 0.094                            | 2308.15             | 215.88              |
| A_68_P26342786 | chr9:20326146-20326190                            | NM_001082485:-305  | Zfp266     | PROMOTER               | 0.297                                           | 0.434                            | 5985.65             | 2600.73             | 0.129                            | 4200.66             | 542.84              |
| A_68_P26342787 | chr9:20326238-20326285                            | NM_001082485:-398  | Zfp266     | PROMOTER               | 0.233                                           | 0.635                            | 1069.12             | 678.69              | 0.148                            | 807.82              | 119.60              |
| A_68_P32462127 | chrX:70588115-70588159                            | NM_001160229:177   | Zfp275     | INSIDE                 | 0.007                                           | 8.116                            | 5707.12             | 46321.67            | 0.056                            | 2110.42             | 117.44              |
| A_68_P26238820 | chr8:125778693-125778737                          | NM_020497:620      | Zfp276     | INSIDE                 | 0.359                                           | 0.630                            | 1063.44             | 669.45              | 0.226                            | 921.19              | 207.92              |
| A_68_P24955196 | chr7:6335606-6335650                              | NM_175247:-399     | Zfp28      | PROMOTER               | 0.242                                           | 0.734                            | 4728.37             | 3468.38             | 0.177                            | 3321.74             | 588.85              |
| A_68_P24955199 | chr7:6335923-6335967                              | NM_175247:-83      | Zfp28      | PROMOTER               | 0.189                                           | 0.472                            | 1659.57             | 783.58              | 0.089                            | 1335.68             | 119.43              |

| ProbeName      | Target position of probe on CpG island microarray | TargetID          | GeneSymbol | CpG island Description | Ratio of relative methylation (TiO2-NP/Vehicle) | Sham group                       |                     |                     | TiO <sub>2</sub> -H group        |                     |                     |
|----------------|---------------------------------------------------|-------------------|------------|------------------------|-------------------------------------------------|----------------------------------|---------------------|---------------------|----------------------------------|---------------------|---------------------|
|                |                                                   |                   |            |                        |                                                 | Relative methylation (Cy-5/Cy-3) | Cy-3 signal (Input) | Cy-5 signal (MeDIP) | Relative methylation (Cy-5/Cy-3) | Cy-3 signal (Input) | Cy-5 signal (MeDIP) |
| A_68_P27855686 | chr11:62603073-62603117                           | NM_138949:-175    | Zfp286     | PROMOTER               | 0.288                                           | 0.383                            | 1745.56             | 669.02              | 0.110                            | 1299.64             | 143.42              |
| A_68_P27855417 | chr11:62545135-62545179                           | NM_133208:-2561   | Zfp287     | PROMOTER               | 0.466                                           | 0.701                            | 1194.57             | 837.43              | 0.327                            | 992.98              | 324.31              |
| A_68_P31002111 | chr16:98183558-98183609                           | NM_001081684:203  | Zfp295     | INSIDE                 | 0.280                                           | 0.548                            | 1006.51             | 551.09              | 0.153                            | 810.57              | 124.40              |
| A_68_P24994119 | chr7:20162872-20162916                            | NM_022409:259     | Zfp296     | INSIDE                 | 0.181                                           | 0.392                            | 2668.91             | 1045.35             | 0.071                            | 1836.11             | 129.85              |
| A_68_P27902560 | chr11:70577738-70577782                           | NM_177565:-188    | Zfp3       | PROMOTER               | 0.222                                           | 0.618                            | 2629.42             | 1625.00             | 0.137                            | 1961.89             | 268.95              |
| A_68_P27902563 | chr11:70578032-70578076                           | NM_177565:106     | Zfp3       | INSIDE                 | 0.548                                           | 0.405                            | 1453.52             | 587.98              | 0.222                            | 1276.75             | 282.92              |
| A_68_P24155790 | chr5:144031255-144031299                          | NM_017467:425     | Zfp316     | INSIDE                 | 0.172                                           | 0.612                            | 1471.81             | 900.28              | 0.105                            | 1108.29             | 116.69              |
| A_68_P24155791 | chr5:144031328-144031372                          | NM_017467:351     | Zfp316     | INSIDE                 | 0.076                                           | 0.449                            | 4921.70             | 2209.77             | 0.034                            | 3505.98             | 119.72              |
| A_68_P24155794 | chr5:144031725-144031769                          | NM_017467:-45     | Zfp316     | PROMOTER               | 0.466                                           | 0.561                            | 1936.11             | 1086.82             | 0.262                            | 1548.00             | 404.81              |
| A_68_P28881066 | chr13:23461022-23461066                           | NM_001111107:27   | Zfp322a    | INSIDE                 | 0.572                                           | 0.657                            | 2833.68             | 1861.60             | 0.376                            | 2303.79             | 866.40              |
| A_68_P28881068 | chr13:23461198-23461242                           | NM_001111107:-149 | Zfp322a    | PROMOTER               | 0.344                                           | 0.589                            | 1652.29             | 972.74              | 0.202                            | 1327.03             | 268.56              |
| A_68_P24973875 | chr7:13551224-13551268                            | NM_178732:34      | Zfp324     | INSIDE                 | 0.409                                           | 0.515                            | 1331.45             | 685.54              | 0.210                            | 1045.44             | 219.91              |
| A_68_P24973048 | chr7:13388705-13388749                            | NM_026046:15483   | Zfp329     | DOWNSTREAM             | 0.466                                           | 0.697                            | 1307.60             | 911.89              | 0.325                            | 1083.63             | 351.86              |
| A_68_P24973049 | chr7:13388821-13388865                            | NM_026046:15367   | Zfp329     | DOWNSTREAM             | 0.144                                           | 0.674                            | 1664.69             | 1121.87             | 0.097                            | 1183.86             | 114.95              |
| A_68_P24973050 | chr7:13388889-13388933                            | NM_026046:15299   | Zfp329     | DOWNSTREAM             | 0.247                                           | 0.691                            | 1425.62             | 984.65              | 0.171                            | 1036.10             | 176.71              |
| A_68_P24973141 | chr7:13403835-13403879                            | NM_026046:353     | Zfp329     | INSIDE                 | 0.340                                           | 0.530                            | 1288.31             | 682.69              | 0.180                            | 1080.60             | 194.90              |
| A_68_P26011369 | chr8:85298048-85298092                            | NM_145600:-45     | Zfp330     | PROMOTER               | 0.360                                           | 0.351                            | 1589.13             | 558.40              | 0.127                            | 1315.68             | 166.53              |
| A_68_P21823563 | chr2:165213394-165213441                          | NM_178411:342     | Zfp334     | INSIDE                 | 0.200                                           | 0.484                            | 2097.41             | 1015.15             | 0.097                            | 1669.03             | 161.23              |
| A_68_P21820483 | chr2:164736035-164736086                          | NM_199027:1190    | Zfp335     | INSIDE                 | 0.297                                           | 0.551                            | 1094.05             | 603.28              | 0.164                            | 734.59              | 120.43              |
| A_68_P29053295 | chr13:55206803-55206847                           | NM_012017:155     | Zfp346     | INSIDE                 | 0.276                                           | 0.603                            | 4070.91             | 2454.59             | 0.166                            | 2887.16             | 480.19              |
| A_68_P27792049 | chr11:50872760-50872804                           | NM_009329:24      | Zfp354a    | INSIDE                 | 0.393                                           | 0.466                            | 1271.52             | 592.67              | 0.183                            | 1116.60             | 204.33              |
| A_68_P27790811 | chr11:50641126-50641170                           | NM_013922:85      | Zfp354c    | INSIDE                 | 0.646                                           | 0.575                            | 2899.51             | 1666.58             | 0.372                            | 2099.59             | 780.08              |
| A_68_P25614206 | chr8:3493424-3493468                              | NM_080461:309     | Zfp358     | INSIDE                 | 0.554                                           | 0.352                            | 2119.63             | 746.48              | 0.195                            | 1681.69             | 327.95              |
| A_68_P25021520 | chr7:29164259-29164303                            | NM_011756:-33     | Zfp36      | PROMOTER               | 0.466                                           | 0.666                            | 1620.87             | 1079.14             | 0.310                            | 1331.10             | 413.27              |
| A_68_P29102609 | chr13:65380152-65380198                           | NM_178364:13      | Zfp369     | INSIDE                 | 0.174                                           | 0.544                            | 1622.39             | 882.81              | 0.095                            | 1278.17             | 121.07              |
| A_68_P28573854 | chr12:81216498-81216557                           | NM_007564:-2527   | Zfp3611    | PROMOTER               | 0.278                                           | 0.613                            | 903.02              | 553.40              | 0.171                            | 697.81              | 119.01              |
| A_68_P31403191 | chr17:84585735-84585779                           | NM_001001806:1531 | Zfp3612    | INSIDE                 | 0.561                                           | 0.595                            | 1047.30             | 623.28              | 0.334                            | 877.89              | 293.28              |
| A_68_P31403203 | chr17:84587080-84587124                           | NM_001001806:185  | Zfp3612    | INSIDE                 | 0.516                                           | 0.305                            | 2182.82             | 664.69              | 0.157                            | 1708.21             | 268.44              |
| A_68_P31403204 | chr17:84587274-84587318                           | NM_001001806:-9   | Zfp3612    | PROMOTER               | 0.321                                           | 0.316                            | 3508.71             | 1107.40             | 0.101                            | 2651.07             | 268.22              |
| A_68_P22963156 | chr4:61869252-61869305                            | NM_009554:302     | Zfp37      | INSIDE                 | 0.235                                           | 1.663                            | 3280.03             | 5454.28             | 0.390                            | 2359.03             | 920.14              |
| A_68_P22963157 | chr4:61869358-61869402                            | NM_009554:200     | Zfp37      | INSIDE                 | 0.265                                           | 0.617                            | 3214.07             | 1982.33             | 0.164                            | 2353.55             | 384.85              |
| A_68_P24818152 | chr6:124958758-124958812                          | NM_175557:-1038   | Zfp384     | PROMOTER               | 0.104                                           | 0.621                            | 2468.36             | 1533.90             | 0.065                            | 1888.64             | 122.54              |
| A_68_P24818153 | chr6:124958879-124958923                          | NM_175557:-922    | Zfp384     | PROMOTER               | 0.517                                           | 0.505                            | 1347.18             | 679.78              | 0.261                            | 1055.62             | 275.37              |
| A_68_P30503432 | chr15:103144711-103144755                         | NM_013866:25785   | Zfp385a    | INSIDE                 | 0.657                                           | 2.208                            | 1289.63             | 2847.64             | 1.450                            | 944.34              | 1368.97             |
| A_68_P30503505 | chr15:103153548-103153598                         | NM_013866:16945   | Zfp385a    | INSIDE                 | 0.079                                           | 2.034                            | 4335.45             | 881.79              | 0.160                            | 2853.66             | 457.12              |
| A_68_P28069222 | chr11:100501295-100501339                         | NM_177790:10691   | Zfp385c    | INSIDE                 | 0.604                                           | 0.612                            | 1173.82             | 718.80              | 0.370                            | 897.51              | 331.73              |
| A_68_P28765737 | chr12:117285901-117285952                         | NM_001004066:-8   | Zfp386     | PROMOTER               | 0.229                                           | 0.483                            | 1357.82             | 655.37              | 0.110                            | 1100.32             | 121.55              |
| A_68_P29672988 | chr14:65977163-65977207                           | NM_199029:-328    | Zfp395     | PROMOTER               | 0.164                                           | 0.706                            | 1716.30             | 1210.95             | 0.116                            | 1424.76             | 164.68              |
| A_68_P29672990 | chr14:65977418-65977462                           | NM_199029:-72     | Zfp395     | PROMOTER               | 0.650                                           | 0.548                            | 1234.36             | 676.50              | 0.356                            | 1021.31             | 363.56              |
| A_68_P29672993 | chr14:65977836-65977880                           | NM_199029:346     | Zfp395     | INSIDE                 | 0.445                                           | 0.659                            | 1259.26             | 829.55              | 0.293                            | 1109.18             | 325.14              |
| A_68_P31889607 | chr18:84758993-84759052                           | NM_001033341:-126 | Zfp407     | PROMOTER               | 0.301                                           | 0.290                            | 1917.24             | 556.95              | 0.087                            | 1370.17             | 119.82              |
| A_68_P30342959 | chr15:75447008-75447052                           | NM_001044718:-84  | Zfp41      | PROMOTER               | 0.332                                           | 0.545                            | 2116.98             | 1152.76             | 0.181                            | 1691.87             | 305.67              |
| A_68_P30342960 | chr15:75447074-75447118                           | NM_001044718:-18  | Zfp41      | PROMOTER               | 0.662                                           | 0.658                            | 5546.32             | 3649.34             | 0.436                            | 3908.26             | 1702.44             |
| A_68_P30342961 | chr15:75447233-75447277                           | NM_001044718:140  | Zfp41      | INSIDE                 | 0.625                                           | 0.412                            | 1561.99             | 644.23              | 0.258                            | 1111.18             | 286.26              |

| ProbeName      | Target position of probe on CpG island microarray | TargetID           | GeneSymbol | CpG island Description | Ratio of relative methylation (TiO2-NP/Vehicle) | Sham group                       |                     |                     | TiO <sub>2</sub> -H group        |                     |                     |
|----------------|---------------------------------------------------|--------------------|------------|------------------------|-------------------------------------------------|----------------------------------|---------------------|---------------------|----------------------------------|---------------------|---------------------|
|                |                                                   |                    |            |                        |                                                 | Relative methylation (Cy-5/Cy-3) | Cy-3 signal (Input) | Cy-5 signal (MeDIP) | Relative methylation (Cy-5/Cy-3) | Cy-3 signal (Input) | Cy-5 signal (MeDIP) |
| A_68_P31149741 | chr17:33766122-33766166                           | NM_026712:108      | Zfp414     | INSIDE                 | 0.479                                           | 0.612                            | 906.13              | 554.98              | 0.294                            | 758.17              | 222.56              |
| A_68_P31149742 | chr17:33766187-33766231                           | NM_026712:172      | Zfp414     | INSIDE                 | 0.291                                           | 0.445                            | 6747.39             | 3002.33             | 0.129                            | 5296.35             | 685.64              |
| A_68_P25028818 | chr7:30645166-30645210                            | NM_172740:191      | Zfp420     | INSIDE                 | 0.253                                           | 0.492                            | 1317.60             | 648.40              | 0.124                            | 990.70              | 123.34              |
| A_68_P25028819 | chr7:30645245-30645299                            | NM_172740:275      | Zfp420     | INSIDE                 | 0.302                                           | 0.593                            | 957.43              | 567.41              | 0.179                            | 679.63              | 121.45              |
| A_68_P24777346 | chr6:116578724-116578768                          | NM_026057:249      | Zfp422     | INSIDE                 | 0.282                                           | 0.553                            | 3244.64             | 1793.90             | 0.156                            | 2317.78             | 361.06              |
| A_68_P26036154 | chr8:90184192-90184236                            | NM_033327:299280   | Zfp423     | DOWNSTREAM             | 0.291                                           | 0.573                            | 7295.16             | 4182.97             | 0.167                            | 4961.94             | 828.90              |
| A_68_P26036157 | chr8:90184552-90184597                            | NM_033327:298920   | Zfp423     | DOWNSTREAM             | 0.166                                           | 0.616                            | 1439.35             | 886.32              | 0.102                            | 1138.78             | 116.10              |
| A_68_P26038366 | chr8:90484574-90484618                            | NM_033327:-1102    | Zfp423     | PROMOTER               | 0.391                                           | 0.702                            | 2889.02             | 2027.03             | 0.275                            | 2132.18             | 585.63              |
| A_68_P26038371 | chr8:90485107-90485151                            | NM_033327:-1634    | Zfp423     | PROMOTER               | 0.517                                           | 0.517                            | 1355.59             | 700.29              | 0.267                            | 1180.36             | 315.23              |
| A_68_P26038378 | chr8:90485888-90485932                            | NM_033327:-2416    | Zfp423     | PROMOTER               | 0.292                                           | 0.628                            | 2432.62             | 1528.64             | 0.183                            | 1809.04             | 331.51              |
| A_68_P26038381 | chr8:90486316-90486360                            | NM_033327:-2844    | Zfp423     | PROMOTER               | 0.508                                           | 0.687                            | 1521.67             | 1045.01             | 0.349                            | 1154.13             | 402.49              |
| A_68_P25005239 | chr7:25292778-25292822                            | NM_146183:695      | Zfp428     | INSIDE                 | 0.344                                           | 0.540                            | 2038.45             | 1099.97             | 0.185                            | 1600.26             | 296.62              |
| A_68_P31468070 | chr18:5334710-5334760                             | NM_178722:-297     | Zfp438     | PROMOTER               | 0.131                                           | 2.465                            | 1927.74             | 4752.17             | 0.324                            | 1133.78             | 366.87              |
| A_68_P31468071 | chr18:5334781-5334825                             | NM_178722:-365     | Zfp438     | PROMOTER               | 0.262                                           | 1.714                            | 6621.53             | 11347.19            | 0.449                            | 4557.49             | 2044.96             |
| A_68_P24954373 | chr7:6124443-6124487                              | NM_001146024:350   | Zfp444     | INSIDE                 | 0.315                                           | 1.391                            | 1459.96             | 2030.37             | 0.438                            | 1044.12             | 456.88              |
| A_68_P20135165 | chr1:33871553-33871598                            | NM_133817:-303     | Zfp451     | PROMOTER               | 0.173                                           | 0.688                            | 1734.76             | 1194.10             | 0.119                            | 1370.44             | 163.41              |
| A_68_P24427172 | chr6:48389196-48389240                            | NM_001085415:5871  | Zfp467     | INSIDE                 | 0.549                                           | 1.351                            | 4264.31             | 5759.59             | 0.741                            | 2680.08             | 1985.71             |
| A_68_P25089142 | chr7:52003877-52003921                            | NM_178734:89       | Zfp473     | INSIDE                 | 0.295                                           | 0.530                            | 1007.57             | 533.75              | 0.156                            | 772.53              | 120.81              |
| A_68_P24165132 | chr5:146041465-146041509                          | NM_001081431:-2725 | Zfp498     | PROMOTER               | 0.581                                           | 0.514                            | 1170.54             | 602.02              | 0.299                            | 1047.64             | 313.04              |
| A_68_P24165134 | chr5:146041748-146041800                          | NM_001081431:-2437 | Zfp498     | PROMOTER               | 0.171                                           | 0.552                            | 1481.40             | 817.50              | 0.094                            | 1286.94             | 121.57              |
| A_68_P29455869 | chr14:22804369-22804413                           | NM_145459:4433     | Zfp503     | INSIDE                 | 0.313                                           | 0.658                            | 1731.42             | 1140.05             | 0.206                            | 1176.21             | 242.46              |
| A_68_P29455892 | chr14:22807139-22807185                           | NM_145459:1661     | Zfp503     | INSIDE                 | 0.144                                           | 0.636                            | 1611.16             | 1024.55             | 0.092                            | 1288.71             | 118.05              |
| A_68_P29455893 | chr14:22807230-22807274                           | NM_145459:1571     | Zfp503     | INSIDE                 | 0.160                                           | 0.467                            | 2433.51             | 1135.41             | 0.075                            | 1945.26             | 145.44              |
| A_68_P29455907 | chr14:22808867-22808911                           | NM_145459:-65      | Zfp503     | PROMOTER               | 0.399                                           | 0.569                            | 1604.07             | 911.92              | 0.227                            | 1214.52             | 275.57              |
| A_68_P25581872 | chr7:147222785-147222830                          | NM_027201:518      | Zfp511     | INSIDE                 | 0.198                                           | 0.307                            | 2758.23             | 848.04              | 0.061                            | 1939.46             | 118.02              |
| A_68_P23577059 | chr5:31504739-31504783                            | NM_175311:-84      | Zfp513     | PROMOTER               | 0.238                                           | 0.402                            | 1702.97             | 685.42              | 0.096                            | 1268.39             | 121.69              |
| A_68_P31879113 | chr18:83078968-83079012                           | NM_183033:-1280    | Zfp516     | PROMOTER               | 0.447                                           | 1.389                            | 7263.72             | 10088.54            | 0.621                            | 4919.39             | 3053.47             |
| A_68_P31879118 | chr18:83079545-83079600                           | NM_183033:-698     | Zfp516     | PROMOTER               | 0.263                                           | 0.436                            | 1472.32             | 642.13              | 0.115                            | 1117.63             | 128.16              |
| A_68_P31879119 | chr18:83079657-83079701                           | NM_183033:-592     | Zfp516     | PROMOTER               | 0.577                                           | 0.687                            | 1555.85             | 1069.20             | 0.397                            | 1190.30             | 472.38              |
| A_68_P31879121 | chr18:83079861-83079905                           | NM_183033:-388     | Zfp516     | PROMOTER               | 0.234                                           | 0.632                            | 975.37              | 616.53              | 0.148                            | 821.38              | 121.34              |
| A_68_P31879129 | chr18:83080856-83080900                           | NM_001177464:-3145 | Zfp516     | PROMOTER               | 0.201                                           | 1.487                            | 1836.25             | 2730.14             | 0.298                            | 1301.81             | 388.17              |
| A_68_P31086419 | chr17:21669765-21669813                           | NM_144515:-2714    | Zfp52      | PROMOTER               | 0.244                                           | 0.595                            | 1120.49             | 666.87              | 0.145                            | 853.51              | 124.17              |
| A_68_P31509663 | chr18:14128717-14128761                           | NM_145492:2504     | Zfp521     | INSIDE                 | 0.647                                           | 0.709                            | 1369.05             | 970.87              | 0.459                            | 1248.48             | 573.06              |
| A_68_P31509666 | chr18:14129064-14129108                           | NM_145492:2156     | Zfp521     | INSIDE                 | 0.224                                           | 1.826                            | 1431.31             | 2614.02             | 0.409                            | 1103.50             | 451.41              |
| A_68_P24951572 | chr7:4966899-4966945                              | NM_025324:-187     | Zfp524     | DIVERGENT_PROMOTER     | 0.233                                           | 0.450                            | 1318.63             | 593.58              | 0.105                            | 1108.13             | 116.21              |
| A_68_P31782009 | chr18:65741080-65741124                           | NM_207255:1219     | Zfp532     | INSIDE                 | 0.345                                           | 0.494                            | 1236.74             | 611.02              | 0.170                            | 956.13              | 162.83              |
| A_68_P25063497 | chr7:38554739-38554783                            | NM_172385:11       | Zfp536     | INSIDE                 | 0.254                                           | 0.366                            | 1505.87             | 551.57              | 0.093                            | 1250.12             | 116.48              |
| A_68_P25063501 | chr7:38555245-38555289                            | NM_172385:-495     | Zfp536     | PROMOTER               | 0.363                                           | 0.675                            | 1965.18             | 1325.54             | 0.245                            | 1624.38             | 397.88              |
| A_68_P25063515 | chr7:38556810-38556854                            | NM_172385:-2061    | Zfp536     | PROMOTER               | 0.370                                           | 0.645                            | 1075.96             | 693.54              | 0.239                            | 811.94              | 193.89              |
| A_68_P25063517 | chr7:38557044-38557088                            | NM_172385:-2295    | Zfp536     | PROMOTER               | 0.587                                           | 0.596                            | 1286.86             | 767.42              | 0.350                            | 1140.18             | 399.32              |
| A_68_P25063531 | chr7:38558593-38558648                            | NM_172385:-3849    | Zfp536     | PROMOTER               | 0.280                                           | 0.398                            | 1341.66             | 534.25              | 0.111                            | 1078.38             | 120.20              |
| A_68_P25504685 | chr7:134377078-134377122                          | NM_146201:144      | Zfp553     | INSIDE                 | 0.351                                           | 0.595                            | 3038.36             | 1807.63             | 0.209                            | 2190.21             | 457.91              |
| A_68_P26337051 | chr9:18277941-18277985                            | NM_028935:41       | Zfp558     | INSIDE                 | 0.134                                           | 1.754                            | 5047.42             | 8850.97             | 0.235                            | 3329.71             | 780.91              |
| A_68_P25029850 | chr7:30875471-30875515                            | NM_152814:37       | Zfp566     | INSIDE                 | 0.332                                           | 0.561                            | 1419.16             | 795.82              | 0.186                            | 1058.68             | 196.97              |

| ProbeName      | Target position of probe on CpG island microarray | TargetID           | GeneSymbol | CpG island Description | Ratio of relative methylation (TiO2-NP/Vehicle) | Sham group                       |                     |                     | TiO <sub>2</sub> -H group        |                     |                     |
|----------------|---------------------------------------------------|--------------------|------------|------------------------|-------------------------------------------------|----------------------------------|---------------------|---------------------|----------------------------------|---------------------|---------------------|
|                |                                                   |                    |            |                        |                                                 | Relative methylation (Cy-5/Cy-3) | Cy-3 signal (Input) | Cy-5 signal (MeDIP) | Relative methylation (Cy-5/Cy-3) | Cy-3 signal (Input) | Cy-5 signal (MeDIP) |
| A_68_P31166723 | chr17:37139521-37139565                           | NR_033137:-1068    | Zfp57      | PROMOTER               | 0.402                                           | 0.568                            | 1340.99             | 761.64              | 0.228                            | 962.23              | 219.44              |
| A_68_P25008231 | chr7:25862140-25862187                            | NM_001168506:-60   | Zfp574     | DIVERGENT_PROMOTER     | 0.222                                           | 0.680                            | 1118.80             | 760.76              | 0.151                            | 820.12              | 123.60              |
| A_68_P24951776 | chr7:5003006-5003050                              | NM_026900:-105     | Zfp580     | PROMOTER               | 0.190                                           | 0.514                            | 3152.43             | 1619.80             | 0.097                            | 2211.55             | 215.50              |
| A_68_P24951777 | chr7:5003100-5003144                              | NM_026900:-11      | Zfp580     | PROMOTER               | 0.423                                           | 0.626                            | 1500.18             | 938.54              | 0.264                            | 1245.68             | 329.43              |
| A_68_P24951780 | chr7:5003473-5003517                              | NM_026900:361      | Zfp580     | INSIDE                 | 0.300                                           | 1.634                            | 1369.84             | 2238.52             | 0.491                            | 1043.17             | 511.69              |
| A_68_P25269627 | chr7:88137961-88138005                            | NM_178707:-587     | Zfp592     | PROMOTER               | 0.529                                           | 0.475                            | 1775.37             | 842.83              | 0.251                            | 1519.33             | 381.72              |
| A_68_P30506931 | chr16:3872466-3872510                             | NM_001033159:-114  | Zfp597     | PROMOTER               | 0.268                                           | 0.594                            | 2790.27             | 1656.08             | 0.159                            | 2087.26             | 331.93              |
| A_68_P26351028 | chr9:22064295-22064339                            | NM_181419:23       | Zfp599     | INSIDE                 | 0.604                                           | 0.523                            | 1647.92             | 861.06              | 0.316                            | 1267.56             | 400.15              |
| A_68_P25018704 | chr7:28516297-28516346                            | NM_009560:-106     | Zfp60      | PROMOTER               | 0.410                                           | 0.489                            | 1102.47             | 539.29              | 0.201                            | 827.88              | 166.06              |
| A_68_P25018706 | chr7:28516596-28516644                            | NM_009560:193      | Zfp60      | INSIDE                 | 0.261                                           | 0.635                            | 947.15              | 601.13              | 0.166                            | 751.37              | 124.48              |
| A_68_P24972086 | chr7:13063602-13063648                            | NM_001039951:-29   | Zfp606     | PROMOTER               | 0.097                                           | 0.731                            | 2191.81             | 1602.35             | 0.071                            | 1688.84             | 120.13              |
| A_68_P31722243 | chr18:55147517-55147561                           | NM_175751:2296     | Zfp608     | INSIDE                 | 0.444                                           | 0.413                            | 1266.85             | 523.68              | 0.184                            | 982.38              | 180.48              |
| A_68_P31722245 | chr18:55147700-55147744                           | NM_175751:2112     | Zfp608     | INSIDE                 | 0.349                                           | 0.653                            | 1413.12             | 922.57              | 0.228                            | 1056.52             | 240.77              |
| A_68_P25068287 | chr7:46799838-46799882                            | NM_001004139:26725 | Zfp619     | DOWNSTREAM             | 0.193                                           | 0.585                            | 1305.08             | 763.29              | 0.113                            | 1030.77             | 116.47              |
| A_68_P27781837 | chr11:49016791-49016837                           | NM_001024846:-187  | Zfp62      | PROMOTER               | 0.155                                           | 1.535                            | 747.40              | 1147.24             | 0.238                            | 520.00              | 123.51              |
| A_68_P27781838 | chr11:49016880-49016924                           | NM_001024846:-99   | Zfp62      | PROMOTER               | 0.268                                           | 0.682                            | 4759.34             | 3244.03             | 0.182                            | 3846.82             | 701.43              |
| A_68_P30084535 | chr15:25913713-25913757                           | NM_144523:-386     | Zfp622     | PROMOTER               | 0.320                                           | 0.589                            | 1339.31             | 788.35              | 0.188                            | 1004.97             | 189.42              |
| A_68_P30084537 | chr15:25913916-25913960                           | NM_144523:-182     | Zfp622     | PROMOTER               | 0.307                                           | 0.740                            | 3944.02             | 2917.47             | 0.227                            | 2881.16             | 654.34              |
| A_68_P30084538 | chr15:25914029-25914073                           | NM_144523:-70      | Zfp622     | PROMOTER               | 0.324                                           | 0.545                            | 2913.87             | 1587.63             | 0.177                            | 2220.02             | 392.50              |
| A_68_P22038452 | chr3:32409336-32409380                            | NM_001161818:-113  | Zfp639     | PROMOTER               | 0.209                                           | 0.497                            | 1877.11             | 932.54              | 0.104                            | 1464.39             | 151.70              |
| A_68_P23962876 | chr5:107125079-107125123                          | NM_026856:749      | Zfp644     | INSIDE                 | 0.593                                           | 0.299                            | 2493.51             | 746.29              | 0.178                            | 2052.64             | 364.35              |
| A_68_P20730831 | chr11:156052030-156052074                         | NM_001204908:3736  | Zfp648     | INSIDE                 | 0.580                                           | 0.635                            | 1837.98             | 1167.92             | 0.368                            | 1387.16             | 511.01              |
| A_68_P20730836 | chr11:156052430-156052474                         | NM_001204908:4136  | Zfp648     | INSIDE                 | 0.402                                           | 0.615                            | 1327.37             | 815.96              | 0.247                            | 1041.18             | 257.49              |
| A_68_P24164945 | chr5:145992341-145992385                          | NM_001083958:-221  | Zfp655     | PROMOTER               | 0.443                                           | 0.599                            | 1108.91             | 664.54              | 0.265                            | 960.77              | 255.03              |
| A_68_P24164946 | chr5:145992407-145992453                          | NM_001083958:-153  | Zfp655     | PROMOTER               | 0.168                                           | 0.497                            | 1853.86             | 920.47              | 0.083                            | 1411.20             | 117.60              |
| A_68_P24164951 | chr5:145993056-145993100                          | NM_028298:451      | Zfp655     | INSIDE                 | 0.471                                           | 0.556                            | 1210.41             | 672.50              | 0.262                            | 1057.89             | 277.07              |
| A_68_P25082976 | chr7:50817634-50817683                            | NM_001008549:-81   | Zfp658     | PROMOTER               | 0.111                                           | 0.621                            | 2416.77             | 1500.29             | 0.069                            | 1777.42             | 122.54              |
| A_68_P25082977 | chr7:50817749-50817793                            | NM_001008549:31    | Zfp658     | INSIDE                 | 0.176                                           | 0.563                            | 1600.81             | 900.83              | 0.099                            | 1206.00             | 119.75              |
| A_68_P25082978 | chr7:50817824-50817869                            | NM_001008549:107   | Zfp658     | INSIDE                 | 0.161                                           | 0.595                            | 1693.69             | 1008.10             | 0.096                            | 1244.50             | 119.40              |
| A_68_P21823447 | chr2:165194226-165194272                          | NM_001005425:-6629 | Zfp663     | PROMOTER               | 0.410                                           | 0.586                            | 1286.83             | 753.90              | 0.240                            | 937.90              | 225.02              |
| A_68_P24954796 | chr7:6237873-6237917                              | NM_001024928:-287  | Zfp667     | PROMOTER               | 0.233                                           | 0.626                            | 982.30              | 614.46              | 0.146                            | 794.62              | 115.95              |
| A_68_P25507823 | chr7:135019837-135019881                          | NM_146259:479      | Zfp668     | INSIDE                 | 0.619                                           | 0.639                            | 1201.88             | 768.49              | 0.396                            | 966.17              | 382.61              |
| A_68_P24130914 | chr5:139060935-139060979                          | NM_001044747:15    | Zfp68      | INSIDE                 | 0.494                                           | 0.723                            | 1924.95             | 1391.16             | 0.357                            | 1499.59             | 535.79              |
| A_68_P22341850 | chr3:94818782-94818826                            | NM_030074:356      | Zfp687     | INSIDE                 | 0.546                                           | 0.581                            | 1044.57             | 606.94              | 0.317                            | 792.04              | 251.19              |
| A_68_P22341859 | chr3:94819900-94819945                            | NM_030074:-762     | Zfp687     | PROMOTER               | 0.530                                           | 0.544                            | 1255.30             | 682.68              | 0.288                            | 1007.23             | 290.23              |
| A_68_P25505644 | chr7:134592579-134592625                          | NM_175163:70       | Zfp689     | INSIDE                 | 0.656                                           | 0.528                            | 1421.16             | 749.72              | 0.346                            | 1004.56             | 347.43              |
| A_68_P23254146 | chr4:120624021-120624065                          | NM_001005788:264   | Zfp69      | INSIDE                 | 0.519                                           | 0.454                            | 1515.26             | 688.54              | 0.236                            | 1260.87             | 297.48              |
| A_68_P27830258 | chr11:58120752-58120796                           | NM_001040686:204   | Zfp692     | INSIDE                 | 0.624                                           | 0.616                            | 1151.09             | 708.82              | 0.384                            | 948.30              | 364.10              |
| A_68_P22360090 | chr3:98231396-98231440                            | NM_172863:45015    | Zfp697     | INSIDE                 | 0.233                                           | 0.571                            | 1128.96             | 644.47              | 0.133                            | 894.34              | 118.88              |
| A_68_P22360097 | chr3:98232384-98232428                            | NM_172863:46003    | Zfp697     | INSIDE                 | 0.160                                           | 0.498                            | 1747.31             | 870.94              | 0.080                            | 1458.40             | 116.57              |
| A_68_P30351004 | chr15:76709899-76709943                           | NM_145916:215      | Zfp7       | INSIDE                 | 0.217                                           | 0.596                            | 1210.58             | 721.99              | 0.130                            | 900.39              | 116.73              |
| A_68_P25735800 | chr8:28087824-28087868                            | NM_001101502:39    | Zfp703     | INSIDE                 | 0.261                                           | 0.608                            | 2335.99             | 1420.43             | 0.159                            | 1711.28             | 271.44              |
| A_68_P30141816 | chr15:36937216-36937260                           | NM_026521:-81      | Zfp706     | PROMOTER               | 0.477                                           | 0.588                            | 2500.93             | 1471.67             | 0.281                            | 1874.31             | 526.37              |
| A_68_P25264702 | chr7:87226863-87226912                            | NM_175433:55774    | Zfp710     | INSIDE                 | 0.341                                           | 1.610                            | 1303.70             | 2098.42             | 0.549                            | 951.92              | 522.55              |

| ProbeName      | Target position of probe on CpG island microarray | TargetID          | GeneSymbol | CpG island Description | Ratio of relative methylation (TiO2-NP/Vehicle) | Sham group                       |                     |                     | TiO <sub>2</sub> -H group        |                     |                     |
|----------------|---------------------------------------------------|-------------------|------------|------------------------|-------------------------------------------------|----------------------------------|---------------------|---------------------|----------------------------------|---------------------|---------------------|
|                |                                                   |                   |            |                        |                                                 | Relative methylation (Cy-5/Cy-3) | Cy-3 signal (Input) | Cy-5 signal (MeDIP) | Relative methylation (Cy-5/Cy-3) | Cy-3 signal (Input) | Cy-5 signal (MeDIP) |
| A_68_P32603683 | chrX:109714707-109714751                          | NM_177747:594     | Zfp711     | INSIDE                 | 0.314                                           | 1.682                            | 1399.18             | 2352.86             | 0.527                            | 652.40              | 343.98              |
| A_68_P29107216 | chr13:67161978-67162022                           | NM_001166218:106  | Zfp712     | INSIDE                 | 0.496                                           | 0.614                            | 1579.81             | 969.42              | 0.304                            | 1241.60             | 378.03              |
| A_68_P25081793 | chr7:50568397-50568441                            | NM_027264:213     | Zfp715     | INSIDE                 | 0.644                                           | 0.507                            | 5156.42             | 2612.85             | 0.326                            | 4186.34             | 1366.36             |
| A_68_P30496553 | chr15:102034646-102034690                         | NM_153194:-4029   | Zfp740     | PROMOTER               | 0.443                                           | 0.497                            | 1135.27             | 564.41              | 0.220                            | 894.13              | 196.99              |
| A_68_P25505329 | chr7:134507375-134507419                          | NM_175560:12168   | Zfp747     | DOWNSTREAM             | 0.226                                           | 0.581                            | 2164.11             | 1257.35             | 0.131                            | 1676.62             | 220.09              |
| A_68_P25505268 | chr7:134488780-134488824                          | NM_146202:26      | Zfp768     | INSIDE                 | 0.294                                           | 0.541                            | 5020.78             | 2714.09             | 0.159                            | 3484.95             | 553.49              |
| A_68_P21538596 | chr2:114027103-114027147                          | NM_175466:44      | Zfp770     | INSIDE                 | 0.374                                           | 0.555                            | 1476.51             | 818.98              | 0.207                            | 1188.32             | 246.40              |
| A_68_P25504739 | chr7:134387875-134387919                          | NM_177362:-143    | Zfp771     | PROMOTER               | 0.445                                           | 0.593                            | 1789.04             | 1060.87             | 0.264                            | 1419.08             | 374.74              |
| A_68_P25504797 | chr7:134398221-134398265                          | NM_177362:10203   | Zfp771     | INSIDE                 | 0.469                                           | 0.439                            | 1289.62             | 566.25              | 0.206                            | 989.47              | 203.64              |
| A_68_P27291280 | chr10:81233564-81233608                           | NM_199062:301     | Zfp781     | INSIDE                 | 0.279                                           | 0.672                            | 3324.63             | 2233.59             | 0.187                            | 2733.51             | 511.68              |
| A_68_P24951727 | chr7:4990151-4990195                              | NM_001039532:-124 | Zfp784     | PROMOTER               | 0.590                                           | 0.495                            | 1695.96             | 839.82              | 0.292                            | 1174.83             | 343.22              |
| A_68_P24954290 | chr7:6106969-6107013                              | NM_001013012:583  | Zfp787     | INSIDE                 | 0.263                                           | 0.636                            | 2127.44             | 1353.98             | 0.167                            | 1612.30             | 269.57              |
| A_68_P21382117 | chr2:81893227-81893271                            | NM_175513:-566    | Zfp804a    | PROMOTER               | 0.256                                           | 0.626                            | 4735.49             | 2962.82             | 0.160                            | 3531.01             | 566.57              |
| A_68_P31148787 | chr17:33495685-33495729                           | NM_207541:117     | Zfp81      | INSIDE                 | 0.166                                           | 0.496                            | 1792.46             | 889.21              | 0.082                            | 1430.98             | 117.67              |
| A_68_P26158503 | chr8:112229246-112229291                          | NM_001167946:-180 | Zfp821     | PROMOTER               | 0.209                                           | 0.587                            | 1375.93             | 808.02              | 0.123                            | 967.55              | 118.73              |
| A_68_P25670892 | chr8:13869760-13869804                            | NM_181854:142     | Zfp828     | INSIDE                 | 0.588                                           | 0.622                            | 1248.35             | 776.91              | 0.366                            | 942.02              | 344.73              |
| A_68_P27968102 | chr11:82578176-82578220                           | NM_025884:352     | Zfp830     | INSIDE                 | 0.441                                           | 0.519                            | 2850.36             | 1480.36             | 0.229                            | 2169.05             | 496.36              |
| A_68_P28740679 | chr12:112088312-112088356                         | NM_001199785:-154 | Zfp839     | DIVERGENT_PROMOTER     | 0.211                                           | 0.522                            | 1567.46             | 818.57              | 0.110                            | 1114.40             | 122.80              |
| A_68_P28740680 | chr12:112088415-112088460                         | NM_001199785:-51  | Zfp839     | DIVERGENT_PROMOTER     | 0.549                                           | 0.750                            | 4590.79             | 3442.32             | 0.412                            | 3358.40             | 1383.67             |
| A_68_P26343012 | chr9:20385783-20385830                            | NM_172919:35      | Zfp846     | INSIDE                 | 0.421                                           | 0.679                            | 981.98              | 666.79              | 0.286                            | 714.64              | 204.52              |
| A_68_P24951608 | chr7:4971880-4971924                              | NM_001033383:-75  | Zfp865     | PROMOTER               | 0.211                                           | 0.610                            | 1354.54             | 825.75              | 0.128                            | 1101.01             | 141.39              |
| A_68_P25947576 | chr8:72149308-72149352                            | NM_001045553:-256 | Zfp868     | PROMOTER               | 0.639                                           | 0.748                            | 3835.41             | 2867.80             | 0.478                            | 3162.71             | 1511.47             |
| A_68_P25947577 | chr8:72149392-72149438                            | NM_001045553:-340 | Zfp868     | PROMOTER               | 0.138                                           | 0.704                            | 1744.78             | 1227.91             | 0.097                            | 1254.48             | 121.53              |
| A_68_P31147012 | chr17:32925128-32925172                           | NM_172458:82      | Zfp871     | INSIDE                 | 0.281                                           | 0.683                            | 1074.16             | 733.40              | 0.192                            | 783.56              | 150.47              |
| A_68_P25959007 | chr8:74432656-74432700                            | NM_001166645:174  | Zfp882     | INSIDE                 | 0.539                                           | 0.635                            | 820.64              | 521.05              | 0.342                            | 739.49              | 252.94              |
| A_68_P26139674 | chr8:108939165-108939209                          | NM_011764:-52     | Zfp90      | PROMOTER               | 0.248                                           | 0.631                            | 2362.80             | 1491.34             | 0.157                            | 1857.77             | 291.06              |
| A_68_P26139675 | chr8:108939273-108939317                          | NM_011764:56      | Zfp90      | INSIDE                 | 0.299                                           | 0.494                            | 1046.46             | 516.55              | 0.148                            | 842.17              | 124.23              |
| A_68_P26139677 | chr8:108939449-108939493                          | NM_011764:232     | Zfp90      | INSIDE                 | 0.569                                           | 0.531                            | 1320.09             | 700.60              | 0.302                            | 1016.72             | 306.91              |
| A_68_P25004262 | chr7:25101544-25101588                            | NM_001199321:119  | Zfp94      | INSIDE                 | 0.470                                           | 0.719                            | 2015.64             | 1448.31             | 0.338                            | 1391.49             | 470.18              |
| A_68_P24958144 | chr7:7073964-7074008                              | NM_172738:201     | Zfp954     | INSIDE                 | 0.547                                           | 0.594                            | 2113.52             | 1255.26             | 0.325                            | 1698.24             | 551.27              |
| A_68_P24958145 | chr7:7074049-7074093                              | NM_172738:117     | Zfp954     | INSIDE                 | 0.368                                           | 0.624                            | 1752.32             | 1094.30             | 0.230                            | 1266.05             | 290.61              |
| A_68_P25947839 | chr8:72273658-72273702                            | NM_001200023:181  | Zfp963     | INSIDE                 | 0.652                                           | 0.357                            | 2152.55             | 767.40              | 0.232                            | 1797.64             | 417.73              |
| A_68_P25947618 | chr8:72178919-72178963                            | NM_001177527:486  | Zfp964     | INSIDE                 | 0.424                                           | 0.654                            | 853.37              | 558.16              | 0.277                            | 599.49              | 166.07              |
| A_68_P26232278 | chr8:124805221-124805265                          | NM_009569:-798    | Zfpm1      | PROMOTER               | 0.287                                           | 0.706                            | 2890.92             | 2040.33             | 0.203                            | 2183.91             | 442.96              |
| A_68_P26232281 | chr8:124805601-124805645                          | NM_009569:-418    | Zfpm1      | PROMOTER               | 0.654                                           | 3.113                            | 7093.42             | 22079.62            | 2.037                            | 4233.43             | 8622.50             |
| A_68_P26232299 | chr8:124808193-124808241                          | NM_009569:2176    | Zfpm1      | INSIDE                 | 0.240                                           | 0.490                            | 1186.44             | 581.57              | 0.118                            | 988.73              | 116.35              |
| A_68_P30160396 | chr15:40486463-40486507                           | NM_011766:-103    | Zfpm2      | PROMOTER               | 0.085                                           | 0.606                            | 3340.84             | 2023.81             | 0.052                            | 2247.96             | 115.78              |
| A_68_P30160401 | chr15:40487098-40487142                           | NM_011766:533     | Zfpm2      | INSIDE                 | 0.169                                           | 0.680                            | 1427.21             | 970.91              | 0.115                            | 1061.15             | 121.88              |
| A_68_P30160402 | chr15:40487224-40487274                           | NM_011766:661     | Zfpm2      | INSIDE                 | 0.103                                           | 0.733                            | 2682.53             | 1967.08             | 0.075                            | 1773.98             | 133.72              |
| A_68_P30019878 | chr15:12047227-12047275                           | NM_011767:-355    | Zfr        | PROMOTER               | 0.165                                           | 1.476                            | 2159.40             | 3187.97             | 0.243                            | 1475.39             | 359.07              |
| A_68_P30019880 | chr15:12047515-12047559                           | NM_011767:-69     | Zfr        | PROMOTER               | 0.251                                           | 0.641                            | 961.01              | 615.57              | 0.161                            | 749.52              | 120.32              |
| A_68_P21568392 | chr2:119034387-119034433                          | NM_001164827:-45  | Zfyve19    | PROMOTER               | 0.302                                           | 0.484                            | 1173.15             | 567.34              | 0.146                            | 828.70              | 121.06              |
| A_68_P28746257 | chr12:113052309-113052356                         | NM_026752:-48     | Zfyve21    | DIVERGENT_PROMOTER     | 0.234                                           | 0.514                            | 3051.94             | 1568.17             | 0.120                            | 2361.82             | 284.15              |
| A_68_P21910191 | chr2:181100855-181100899                          | NM_001048148:749  | Zgpat      | INSIDE                 | 0.207                                           | 0.519                            | 2327.42             | 1208.76             | 0.108                            | 1971.85             | 212.37              |



| ProbeName      | Target position of probe on CpG island microarray | TargetID           | GeneSymbol | CpG island Description | Ratio of relative methylation (TiO2-NP/Vehicle) | Sham group                       |                     |                     | TiO <sub>2</sub> -H group        |                     |                     |
|----------------|---------------------------------------------------|--------------------|------------|------------------------|-------------------------------------------------|----------------------------------|---------------------|---------------------|----------------------------------|---------------------|---------------------|
|                |                                                   |                    |            |                        |                                                 | Relative methylation (Cy-5/Cy-3) | Cy-3 signal (Input) | Cy-5 signal (MeDIP) | Relative methylation (Cy-5/Cy-3) | Cy-3 signal (Input) | Cy-5 signal (MeDIP) |
| A_68_P30245925 | chr15:57908333-57908377                           | NM_001042438:-310  | Zhx1       | PROMOTER               | 0.448                                           | 0.556                            | 4504.29             | 2502.28             | 0.249                            | 3468.84             | 863.28              |
| A_68_P30245927 | chr15:57908540-57908584                           | NM_001042438:-518  | Zhx1       | PROMOTER               | 0.604                                           | 0.659                            | 906.18              | 597.41              | 0.398                            | 684.63              | 272.56              |
| A_68_P21797520 | chr2:160698110-160698154                          | NM_177263:594      | Zhx3       | INSIDE                 | 0.121                                           | 0.556                            | 4546.46             | 2527.45             | 0.067                            | 3220.19             | 217.36              |
| A_68_P26721507 | chr9:91259790-91259834                            | NM_009573:825      | Zic1       | INSIDE                 | 0.635                                           | 0.461                            | 1301.45             | 600.40              | 0.293                            | 1053.38             | 308.39              |
| A_68_P29961926 | chr14:122873265-122873309                         | NM_009574:-1319    | Zic2       | DIVERGENT_PROMOTER     | 0.496                                           | 0.613                            | 2803.90             | 1718.23             | 0.304                            | 2119.16             | 644.41              |
| A_68_P29961928 | chr14:122873448-122873492                         | NM_009574:-1135    | Zic2       | DIVERGENT_PROMOTER     | 0.256                                           | 0.512                            | 2477.24             | 1268.52             | 0.131                            | 1979.82             | 259.46              |
| A_68_P29961931 | chr14:122873762-122873806                         | NM_009574:-821     | Zic2       | DIVERGENT_PROMOTER     | 0.215                                           | 0.639                            | 1897.42             | 1212.25             | 0.137                            | 1310.39             | 179.67              |
| A_68_P29961944 | chr14:122875451-122875495                         | NM_009574:867      | Zic2       | INSIDE                 | 0.478                                           | 0.595                            | 2523.21             | 1501.09             | 0.284                            | 1988.30             | 565.48              |
| A_68_P32403901 | chrX:55283389-55283441                            | NM_009575:-390     | Zic3       | PROMOTER               | 0.123                                           | 2.087                            | 1230.12             | 2567.23             | 0.256                            | 471.82              | 120.76              |
| A_68_P32403906 | chrX:55284045-55284104                            | NM_009575:270      | Zic3       | INSIDE                 | 0.074                                           | 4.497                            | 1428.96             | 6425.88             | 0.331                            | 542.29              | 179.57              |
| A_68_P26721618 | chr9:91273756-91273800                            | NM_009576:9969     | Zic4       | INSIDE                 | 0.387                                           | 0.678                            | 1231.49             | 835.37              | 0.263                            | 838.63              | 220.15              |
| A_68_P29961839 | chr14:122863102-122863146                         | NM_022987:1756     | Zic5       | INSIDE                 | 0.352                                           | 0.604                            | 916.24              | 552.97              | 0.212                            | 774.75              | 164.57              |
| A_68_P29961850 | chr14:122864514-122864560                         | NM_022987:344      | Zic5       | INSIDE                 | 0.085                                           | 1.788                            | 1092.78             | 1954.43             | 0.152                            | 792.19              | 120.29              |
| A_68_P22953710 | chr4:58956479-58956523                            | NM_001099323:1     | Zkscan16   | INSIDE                 | 0.566                                           | 0.608                            | 1084.88             | 660.06              | 0.344                            | 862.70              | 296.98              |
| A_68_P27837321 | chr11:59319755-59319799                           | NM_001130529:366   | Zkscan17   | INSIDE                 | 0.426                                           | 0.460                            | 1368.04             | 629.36              | 0.196                            | 1124.79             | 220.27              |
| A_68_P27837323 | chr11:59320124-59320168                           | NM_001130529:-4    | Zkscan17   | PROMOTER               | 0.130                                           | 0.660                            | 1810.35             | 1194.00             | 0.085                            | 1387.29             | 118.52              |
| A_68_P28872662 | chr13:21494612-21494656                           | NM_001145778:-10   | Zkscan3    | PROMOTER               | 0.365                                           | 0.728                            | 2642.27             | 1922.65             | 0.266                            | 2039.20             | 541.83              |
| A_68_P27873629 | chr11:65620598-65620642                           | NM_026107:-125     | Zkscan6    | PROMOTER               | 0.212                                           | 0.473                            | 1604.04             | 758.35              | 0.100                            | 1386.18             | 138.84              |
| A_68_P31625899 | chr18:36953656-36953708                           | NM_025594:106      | Zmat2      | INSIDE                 | 0.199                                           | 0.651                            | 1267.50             | 825.40              | 0.129                            | 927.30              | 120.06              |
| A_68_P25717772 | chr8:24780109-24780156                            | NM_177086:0        | Zmat4      | INSIDE                 | 0.183                                           | 0.708                            | 1720.10             | 1217.42             | 0.130                            | 1233.41             | 160.02              |
| A_68_P29477470 | chr14:26276881-26276925                           | NM_183208:-1768    | Zmiz1      | PROMOTER               | 0.520                                           | 0.358                            | 1595.70             | 571.13              | 0.186                            | 1111.08             | 206.81              |
| A_68_P29478592 | chr14:26426602-26426646                           | NM_183208:147954   | Zmiz1      | INSIDE                 | 0.421                                           | 0.445                            | 1472.58             | 655.05              | 0.187                            | 1061.12             | 198.80              |
| A_68_P29478593 | chr14:26426711-26426755                           | NM_183208:148062   | Zmiz1      | INSIDE                 | 0.232                                           | 0.562                            | 1087.34             | 611.02              | 0.131                            | 894.35              | 116.79              |
| A_68_P29478594 | chr14:26426870-26426915                           | NM_183208:148222   | Zmiz1      | INSIDE                 | 0.353                                           | 0.525                            | 2428.51             | 1275.42             | 0.185                            | 1639.02             | 303.99              |
| A_68_P23283385 | chr4:126738210-126738254                          | NM_026670:144      | Zmym1      | INSIDE                 | 0.387                                           | 0.361                            | 2545.42             | 917.71              | 0.139                            | 2042.09             | 284.75              |
| A_68_P32564022 | chrX:98614921-98614970                            | NM_001177985:308   | Zmym3      | INSIDE                 | 0.140                                           | 1.403                            | 1636.79             | 2296.51             | 0.197                            | 767.63              | 150.92              |
| A_68_P23282963 | chr4:126645533-126645577                          | NM_001114399:-387  | Zmym4      | PROMOTER               | 0.261                                           | 0.562                            | 972.88              | 547.04              | 0.147                            | 814.24              | 119.47              |
| A_68_P29624841 | chr14:57429933-57429977                           | NM_144842:599      | Zmym5      | INSIDE                 | 0.372                                           | 0.460                            | 1489.81             | 685.86              | 0.171                            | 1148.41             | 196.90              |
| A_68_P28818473 | chr13:9762982-9763026                             | NM_001199141:1556  | Zmynd11    | INSIDE                 | 0.077                                           | 0.664                            | 5357.19             | 3558.42             | 0.051                            | 3894.44             | 200.43              |
| A_68_P28818474 | chr13:9763095-9763139                             | NM_001199141:1444  | Zmynd11    | INSIDE                 | 0.171                                           | 0.476                            | 2344.92             | 1117.22             | 0.081                            | 1766.11             | 143.52              |
| A_68_P28818475 | chr13:9763163-9763207                             | NM_001199141:1376  | Zmynd11    | INSIDE                 | 0.524                                           | 0.567                            | 1210.13             | 686.07              | 0.297                            | 1053.98             | 313.34              |
| A_68_P21826274 | chr2:165671183-165671231                          | NM_027230:38982    | Zmynd8     | INSIDE                 | 0.559                                           | 4.337                            | 1961.36             | 8505.97             | 2.425                            | 1400.38             | 3396.47             |
| A_68_P24465593 | chr6:54766531-54766575                            | NM_199143:-357     | Znrf2      | PROMOTER               | 0.401                                           | 0.670                            | 2222.15             | 1489.45             | 0.269                            | 1707.36             | 459.35              |
| A_68_P24465594 | chr6:54766604-54766648                            | NM_199143:-283     | Znrf2      | PROMOTER               | 0.410                                           | 0.537                            | 1840.31             | 987.56              | 0.220                            | 1516.27             | 333.72              |
| A_68_P27563481 | chr11:5345058-5345102                             | NM_001080924:-230  | Znrf3      | PROMOTER               | 0.190                                           | 0.554                            | 3769.09             | 2087.22             | 0.105                            | 2964.57             | 311.38              |
| A_68_P31256669 | chr17:56651021-56651065                           | NM_011483:864      | Znrf4      | INSIDE                 | 0.340                                           | 0.683                            | 2859.56             | 1951.67             | 0.232                            | 2164.65             | 503.03              |
| A_68_P31256670 | chr17:56651120-56651164                           | NM_011483:764      | Znrf4      | INSIDE                 | 0.298                                           | 0.618                            | 1002.25             | 619.27              | 0.184                            | 778.98              | 143.56              |
| A_68_P28057143 | chr11:98412469-98412513                           | NM_001166494:80    | Zpbp2      | INSIDE                 | 0.246                                           | 0.505                            | 1163.05             | 587.02              | 0.124                            | 991.07              | 123.27              |
| A_68_P28057144 | chr11:98412585-98412629                           | NM_001166494:196   | Zpbp2      | INSIDE                 | 0.269                                           | 0.457                            | 2698.52             | 1233.87             | 0.123                            | 2073.75             | 255.43              |
| A_68_P32795837 | chrX:160396347-160396391                          | NM_009453:230      | Zrsr2      | INSIDE                 | 0.229                                           | 1.434                            | 1335.87             | 1915.14             | 0.328                            | 616.79              | 202.08              |
| A_68_P24972904 | chr7:13365807-13365851                            | NM_001017955:-4821 | Zscan18    | PROMOTER               | 0.389                                           | 0.658                            | 2850.42             | 1874.64             | 0.256                            | 2132.69             | 545.96              |
| A_68_P23291908 | chr4:128262900-128262946                          | NM_177758:24420    | Zscan20    | INSIDE                 | 0.520                                           | 3.081                            | 1828.81             | 5635.01             | 1.601                            | 1362.16             | 2181.09             |
| A_68_P23291909 | chr4:128263071-128263115                          | NM_177758:24250    | Zscan20    | INSIDE                 | 0.582                                           | 2.509                            | 1907.70             | 4786.37             | 1.460                            | 1270.91             | 1855.73             |
| A_68_P24128899 | chr5:138558291-138558335                          | NM_001044703:180   | Zscan21    | INSIDE                 | 0.455                                           | 0.563                            | 2698.96             | 1520.41             | 0.256                            | 2005.35             | 514.03              |

| ProbeName      | Target position of probe on CpG island microarray | TargetID         | GeneSymbol | CpG island Description | Ratio of relative methylation (TiO2-NP/Vehicle) | Sham group                       |                     |                     | TiO <sub>2</sub> -H group        |                     |                     |
|----------------|---------------------------------------------------|------------------|------------|------------------------|-------------------------------------------------|----------------------------------|---------------------|---------------------|----------------------------------|---------------------|---------------------|
|                |                                                   |                  |            |                        |                                                 | Relative methylation (Cy-5/Cy-3) | Cy-3 signal (Input) | Cy-5 signal (MeDIP) | Relative methylation (Cy-5/Cy-3) | Cy-3 signal (Input) | Cy-5 signal (MeDIP) |
| A_68_P24973507 | chr7:13483057-13483103                            | NM_001001447:-83 | Zscan22    | PROMOTER               | 0.284                                           | 0.539                            | 1225.76             | 660.50              | 0.153                            | 1031.70             | 157.85              |
| A_68_P21579347 | chr2:120996224-120996271                          | NM_178889:638    | Zscan29    | INSIDE                 | 0.292                                           | 0.364                            | 1531.16             | 556.88              | 0.106                            | 1135.92             | 120.64              |
| A_68_P21579349 | chr2:120996373-120996418                          | NM_178889:490    | Zscan29    | INSIDE                 | 0.480                                           | 0.666                            | 1797.60             | 1197.59             | 0.320                            | 1294.63             | 413.66              |
| A_68_P21819854 | chr2:164630477-164630534                          | NM_178375:-108   | Zswim3     | DIVERGENT_PROMOTER     | 0.192                                           | 0.437                            | 2240.88             | 978.95              | 0.084                            | 1423.24             | 119.47              |
| A_68_P26018919 | chr8:86760604-86760650                            | NM_172503:315    | Zswim4     | INSIDE                 | 0.175                                           | 2.010                            | 653.32              | 1313.04             | 0.351                            | 491.37              | 172.66              |
| A_68_P26018926 | chr8:86761267-86761311                            | NM_172503:-347   | Zswim4     | PROMOTER               | 0.602                                           | 0.548                            | 1005.10             | 550.67              | 0.330                            | 789.16              | 260.26              |
| A_68_P27054330 | chr10:33670738-33670782                           | NM_028287:258    | Zufsp      | INSIDE                 | 0.176                                           | 0.608                            | 1478.15             | 899.10              | 0.107                            | 1126.53             | 120.72              |
| A_68_P26495379 | chr9:48863756-48863800                            | NM_012039:93     | Zw10       | INSIDE                 | 0.537                                           | 0.706                            | 1299.77             | 917.03              | 0.379                            | 1151.55             | 436.01              |
| A_68_P27241481 | chr10:72117558-72117607                           | NM_025635:-60    | Zwint      | PROMOTER               | 0.343                                           | 0.635                            | 823.34              | 522.85              | 0.218                            | 684.27              | 149.03              |
| A_68_P27241482 | chr10:72117682-72117727                           | NM_025635:62     | Zwint      | INSIDE                 | 0.208                                           | 0.550                            | 2538.04             | 1397.16             | 0.114                            | 1784.68             | 203.97              |
| A_68_P27241483 | chr10:72117792-72117836                           | NM_025635:172    | Zwint      | INSIDE                 | 0.145                                           | 0.593                            | 1715.60             | 1017.51             | 0.086                            | 1370.75             | 117.82              |
| A_68_P24631969 | chr6:90320325-90320370                            | NM_030260:860    | Zxdc       | INSIDE                 | 0.655                                           | 0.533                            | 1114.63             | 594.15              | 0.349                            | 916.81              | 320.28              |
| A_68_P24631971 | chr6:90320525-90320569                            | NM_030260:1059   | Zxdc       | INSIDE                 | 0.619                                           | 0.692                            | 1515.49             | 1048.08             | 0.428                            | 1144.78             | 489.68              |
| A_68_P23195050 | chr4:107890175-107890219                          | NM_001167936:331 | Zyg11a     | INSIDE                 | 0.160                                           | 0.678                            | 2288.46             | 1552.64             | 0.109                            | 2011.46             | 218.44              |
| A_68_P24397781 | chr6:42299527-42299571                            | NM_011777:-278   | Zyx        | PROMOTER               | 0.557                                           | 0.595                            | 988.78              | 588.11              | 0.331                            | 793.73              | 262.99              |
| A_68_P24397786 | chr6:42300193-42300237                            | NM_011777:388    | Zyx        | INSIDE                 | 0.324                                           | 0.509                            | 3123.25             | 1591.09             | 0.165                            | 2268.68             | 374.48              |
| A_68_P22650340 | chr3:152059616-152059660                          | NM_198416:-19    | Zzz3       | PROMOTER               | 0.386                                           | 0.628                            | 997.79              | 626.69              | 0.242                            | 807.48              | 195.68              |
