# Supplementary material for: Effects of Prenatal Exposure to Titanium Dioxide Nanoparticles on DNA Methylation and Gene Expression Profile in the Mouse Brain
Source: PubMed Central journal article supplement (PMC8915839; doi:10.3389/ftox.2021.705910), 2021-10-08
Supplement: Table8.pdf [file Table8.pdf]

**Supplementary Table 8**

The mRNAs that expression levels were increased (A:  $\geq 1.5$ -fold) or decreased (B:  $\leq 0.67$ -fold) by prenatal TiO<sub>2</sub>-NP treatment in the brain of male offspring determined by SurePrint G3 Mouse GE 8 × 60 K Microarray.

**(A)**

| Genbank Accession | GeneSymbol    | Fold change<br>(TiO <sub>2</sub> -H vs Sham) | Genbank Accession | GeneSymbol    | Fold change<br>(TiO <sub>2</sub> -H vs Sham) |
|-------------------|---------------|----------------------------------------------|-------------------|---------------|----------------------------------------------|
| NM_026489         | Hormad1       | 67.275                                       | NM_146328         | Olf110        | 15.242                                       |
| NM_146401         | Olf1305       | 66.857                                       | NM_007543         | Ceacam2       | 15.012                                       |
| NM_008089         | Gata1         | 66.579                                       | NM_001029893      | Psg26         | 14.980                                       |
| NM_007947         | Lcn5          | 65.345                                       | NM_007617         | Cav3          | 14.231                                       |
| NM_029144         | 4930503B20Rik | 57.083                                       | AK020115          | Adamts11      | 13.852                                       |
| NM_001114678      | Gm5072        | 49.317                                       | XM_001475610      | Mcg1038069    | 13.775                                       |
| BC119564          | Obox3         | 48.068                                       | NM_009220         | Ssty1         | 13.371                                       |
| XM_987873         | 6530409C15Rik | 36.631                                       | NM_182928         | Adm2          | 13.068                                       |
| NR_028311         | Gm4371        | 36.328                                       | NM_026599         | Cgn11         | 13.059                                       |
| NM_010554         | Il1a          | 35.728                                       | NM_134192         | Vmn1r228      | 13.032                                       |
| NM_199366         | Gal3st2       | 30.654                                       | NM_001164725      | Ferl6         | 12.879                                       |
| NM_001104644      | Vmn2r53       | 29.878                                       | NR_045159         | 4933427I22Rik | 12.799                                       |
| NM_001163721      | 1190007F08Rik | 28.071                                       | NM_028826         | Sept14        | 12.641                                       |
| NM_207574         | Olf1383       | 27.877                                       | NM_001037247      | Defb36        | 12.363                                       |
| NM_019473         | Olf155        | 26.965                                       | NM_134183         | Vmn1r21       | 12.126                                       |
| NM_026328         | Reg4          | 26.853                                       | NM_175369         | Ccdc122       | 12.101                                       |
| NM_138746         | Fam50b        | 26.853                                       | NM_146924         | Olf1476       | 12.084                                       |
| NR_037972         | BB014433      | 25.759                                       | NM_001134458      | Il9r          | 11.852                                       |
| NM_008117         | Gh            | 25.440                                       | NM_001033356      | Ntn5          | 11.819                                       |
| NM_015767         | Ttpa          | 25.124                                       | NM_146582         | Olf1046       | 11.705                                       |
| NM_181564         | Dsg4          | 24.319                                       | NM_001100465      | Rhox2h        | 11.640                                       |
| NM_183278         | Fam25c        | 23.769                                       | NM_053152         | Klra22        | 11.624                                       |
| AB049605          | Cav2          | 23.736                                       | NM_175408         | Tmem139       | 11.559                                       |
| NM_007972         | F10           | 23.442                                       | NM_198628         | Gm711         | 11.511                                       |
| AK054182          | Esr1          | 23.023                                       | AK052446          | Pigv          | 11.464                                       |
| AK043214          | Mtus1         | 22.054                                       | NM_198623         | Ubqln3        | 11.337                                       |
| CA947298          | Gdap5         | 21.766                                       | AK132924          | 1700012B07Rik | 11.189                                       |
| NM_025467         | Gkn2          | 20.521                                       | NM_008336         | Ifnab         | 11.181                                       |
| NM_013468         | Ankrd1        | 20.140                                       | NM_009047         | Rem1          | 11.096                                       |
| NM_001168318      | Scara5        | 18.687                                       | AK014899          | 4921515G04Rik | 11.066                                       |
| NM_010935         | Npy6r         | 18.610                                       | NM_175531         | Mrgprb2       | 10.883                                       |
| NR_001463         | Xist          | 18.240                                       | AK142339          | Stab2         | 10.733                                       |
| NM_133996         | Apon          | 18.202                                       | NM_001080769      | Uhrf1bp1      | 10.703                                       |
| NM_145157         | Defb19        | 17.655                                       | NM_001102584      | Vmn2r114      | 10.652                                       |
| NM_146411         | Olf1462       | 17.472                                       | NM_027304         | H1fnt         | 10.498                                       |
| NM_183113         | 4932414N04Rik | 17.280                                       | XR_104915         | Gm3831        | 10.411                                       |
| NM_007775         | Cryge         | 17.208                                       | NM_001163621      | Apol6         | 10.396                                       |
| NM_025731         | Hrasls5       | 17.184                                       | NM_011120         | Prl7d1        | 10.360                                       |
| NM_025721         | Spesp1        | 17.125                                       | CB202205          | AI449212      | 10.204                                       |
| NR_030675         | D730005E14Rik | 17.006                                       | NM_207276         | Defb21        | 10.063                                       |
| AK079222          | Gm13219       | 17.006                                       | NM_010359         | Gstm3         | 9.945                                        |
| NM_183131         | 4930451I11Rik | 16.668                                       | NR_040538         | 1700007F19Rik | 9.911                                        |
| NM_001033283      | Gm97          | 16.518                                       | XR_141004         | Gm10744       | 9.877                                        |
| NM_007777         | Cryge         | 16.359                                       | NM_178047         | Prom2         | 9.822                                        |
| NM_029755         | Calcoco2      | 15.802                                       | BC160365          | Olf105-ps     | 9.788                                        |
| NM_147102         | Olf1552       | 15.617                                       | NM_146700         | Olf1453       | 9.768                                        |
| AK018600          | 9130007G19Rik | 15.595                                       | NM_001081027      | Kcnt2         | 9.761                                        |
| NM_026108         | Hdhd1a        | 15.359                                       | NM_146946         | Olf150        | 9.667                                        |
| NM_001011815      | Olf1533       | 15.327                                       | NM_001190310      | Clec4b1       | 9.441                                        |
| NM_031250         | Ucn3          | 15.242                                       | NM_021782         | Il21          | 9.337                                        |

| Genbank Accession | GeneSymbol    | Fold change<br>(TiO <sub>2</sub> -H vs Sham) |
|-------------------|---------------|----------------------------------------------|
| NM_146821         | Olfir629      | 9.221                                        |
| AU024546          | AU024546      | 9.177                                        |
| NM_001039118      | Klra33        | 9.057                                        |
| NM_027128         | Odam          | 9.038                                        |
| AK005775          | Ankrd36       | 8.938                                        |
| NM_001127686      | Hbb-bh2       | 8.914                                        |
| XR_141939         | Gm10555       | 8.907                                        |
| NM_001185040      | Gm5885        | 8.858                                        |
| AK030785          | C78197        | 8.834                                        |
| NM_013728         | Olfir154      | 8.809                                        |
| NM_027960         | Dpep3         | 8.797                                        |
| XM_001480781      | Gm4553        | 8.791                                        |
| NM_025621         | 2310050C09Rik | 8.730                                        |
| AK042136          | Gm5103        | 8.652                                        |
| NM_027914         | Bbs10         | 8.628                                        |
| AK086943          | Gm6980        | 8.616                                        |
| NM_008189         | Guca1a        | 8.604                                        |
| NM_029351         | Krtap9-3      | 8.580                                        |
| NM_029379         | Tmem225       | 8.509                                        |
| NM_172842         | Lax1          | 8.462                                        |
| BC096608          | Gm9975        | 8.421                                        |
| NM_147037         | Olfir1413     | 8.346                                        |
| NM_146456         | Olfir92       | 8.311                                        |
| AK017086          | 4933436I20Rik | 8.265                                        |
| NM_001177524      | Gml           | 8.242                                        |
| NM_001102662      | Skint1        | 8.219                                        |
| NM_146763         | Olfir1406     | 8.039                                        |
| NR_038045         | Gm10440       | 7.950                                        |
| NM_001100444      | Gm5934        | 7.754                                        |
| CD766363          | 1810013D15Rik | 7.738                                        |
| NM_001005247      | Hps5          | 7.595                                        |
| NM_029587         | 1700012A03Rik | 7.574                                        |
| AK049799          | E130307A14Rik | 7.568                                        |
| NM_145424         | BC089597      | 7.553                                        |
| NR_045404         | G630055G22Rik | 7.506                                        |
| NM_001085516      | Gml2794       | 7.501                                        |
| XR_141235         | D830044D21Rik | 7.423                                        |
| NM_007646         | Cd38          | 7.397                                        |
| AK144055          | Gm2814        | 7.280                                        |
| AK016679          | 4933406B15Rik | 7.265                                        |
| NM_013542         | Gzmb          | 7.185                                        |
| NM_178924         | Upk1b         | 7.155                                        |
| NM_001013810      | Gm5591        | 7.106                                        |
| NM_146847         | Olfir1090     | 7.062                                        |
| AK043165          | A730062M13Rik | 6.936                                        |
| XR_140618         | Ptprd         | 6.931                                        |
| NM_001142631      | Spdya         | 6.926                                        |
| NM_007675         | Ceacam10      | 6.840                                        |
| NR_033355         | 5430416O09Rik | 6.807                                        |
| NM_022879         | Myl7          | 6.797                                        |
| XM_003086474      | A630081J09Rik | 6.639                                        |
| BC075721          | Xpr1          | 6.616                                        |
| NM_001252661      | 5830473C10Rik | 6.575                                        |
| NM_144834         | Serpina10     | 6.575                                        |

| Genbank Accession | GeneSymbol    | Fold change<br>(TiO <sub>2</sub> -H vs Sham) |
|-------------------|---------------|----------------------------------------------|
| NM_199152         | Obscn         | 6.566                                        |
| NM_028550         | 1700074P13Rik | 6.539                                        |
| AK005108          | 1500002C15Rik | 6.494                                        |
| NM_177669         | Skint11       | 6.489                                        |
| NR_040663         | 4930509K18Rik | 6.386                                        |
| NM_010780         | Cma1          | 6.378                                        |
| XR_105027         | A230083G16Rik | 6.351                                        |
| NM_001102607      | Col6a6        | 6.338                                        |
| NM_025867         | Serpinb11     | 6.333                                        |
| NM_001101588      | Cyp4f40       | 6.298                                        |
| NM_053077         | Slc45a2       | 6.294                                        |
| NM_001033131      | Krtdap        | 6.272                                        |
| NM_001195579      | Gm15070       | 6.203                                        |
| NM_146020         | Gltpd2        | 6.160                                        |
| NM_178715         | Tmem30b       | 6.080                                        |
| NR_015568         | 4933406F09Rik | 6.080                                        |
| NM_001037928      | Gm11992       | 6.071                                        |
| NM_013868         | Hspb7         | 6.025                                        |
| NM_145146         | Afm           | 5.988                                        |
| NR_040523         | 1700025N23Rik | 5.971                                        |
| CA481107          | AA617406      | 5.963                                        |
| AK033690          | 9130221J18Rik | 5.942                                        |
| NR_045831         | 4933408N05Rik | 5.909                                        |
| NM_011207         | Ptpn3         | 5.909                                        |
| NM_147039         | Olfir1414     | 5.881                                        |
| NR_040610         | 1700040N02Rik | 5.873                                        |
| NM_177589         | Ulk4          | 5.816                                        |
| NM_001039223      | Gm14137       | 5.804                                        |
| XR_106616         | Gm11735       | 5.788                                        |
| AK016370          | Cdk14         | 5.780                                        |
| XR_104956         | Katnal1       | 5.780                                        |
| NM_207674         | Olfir1082     | 5.772                                        |
| AK077051          | 4932439E07Rik | 5.752                                        |
| AK076789          | 4930458A03Rik | 5.724                                        |
| NM_021440         | BC100451      | 5.669                                        |
| NM_175439         | Mars2         | 5.629                                        |
| NM_001163192      | Ly6g6f        | 5.618                                        |
| NM_199468         | Zcchc5        | 5.610                                        |
| NM_138953         | Ell2          | 5.560                                        |
| NM_008361         | Il1b          | 5.552                                        |
| NM_027010         | Crygf         | 5.529                                        |
| AK049156          | Gm6846        | 5.514                                        |
| NM_026136         | 4930449I24Rik | 5.457                                        |
| NM_001033235      | Trim40        | 5.453                                        |
| AK087175          | Slc23a2       | 5.441                                        |
| NM_001048219      | Nlrp9a        | 5.367                                        |
| AK080477          | 6030451C04Rik | 5.363                                        |
| NM_016869         | Corin         | 5.329                                        |
| NM_001159934      | Oas1h         | 5.293                                        |
| NM_138674         | Pkhd111       | 5.282                                        |
| NM_008803         | Pde8a         | 5.274                                        |
| AK082335          | Adam22        | 5.263                                        |
| AK016636          | 4933403J19Rik | 5.216                                        |
| AK016158          | 4930557B15Rik | 5.195                                        |

| Genbank Accession | GeneSymbol    | Fold change<br>(TiO <sub>2</sub> -H vs Sham) |
|-------------------|---------------|----------------------------------------------|
| NM_153143         | Kctd11        | 5.187                                        |
| NM_177316         | Fpr-rs6       | 5.180                                        |
| NM_008694         | Ngp           | 5.166                                        |
| AK077314          | Gm5447        | 5.141                                        |
| NM_007538         | Opn1sw        | 5.116                                        |
| NM_177361         | Ifna12        | 5.098                                        |
| NM_029692         | Upp2          | 5.084                                        |
| NM_030098         | Rnase6        | 5.081                                        |
| NR_045930         | 1700092K14Rik | 5.067                                        |
| NM_001037502      | Defb28        | 5.025                                        |
| AK018581          | 9130001E16Rik | 5.021                                        |
| AK162803          | Dleu2         | 5.014                                        |
| NM_178687         | Cd226         | 5.014                                        |
| NM_001001807      | Olf279        | 5.014                                        |
| XM_486266         | 4921528I07Rik | 5.011                                        |
| BC152873          | Vmn2r66       | 4.986                                        |
| NM_009802         | Car6          | 4.959                                        |
| NM_183224         | Fam19a3       | 4.955                                        |
| NM_033593         | Pcdhga10      | 4.945                                        |
| AA985897          | AI195470      | 4.931                                        |
| NM_001146107      | Gm10696       | 4.925                                        |
| AK021364          | E130101E03Rik | 4.914                                        |
| NM_146762         | Olf1013       | 4.911                                        |
| NM_008006         | Fgf2          | 4.884                                        |
| BG068955          | AU024245      | 4.877                                        |
| NM_146360         | Olf574        | 4.877                                        |
| AK134699          | 4931406P16Rik | 4.874                                        |
| XM_003086833      | Gpr112        | 4.874                                        |
| AK138241          | Gm10489       | 4.874                                        |
| NM_001162928      | Pom121l2      | 4.850                                        |
| NM_001099314      | Msmg          | 4.837                                        |
| NM_175649         | Tnfrsf26      | 4.803                                        |
| BG066474          | C79562        | 4.790                                        |
| NM_001039241      | LOC100045026  | 4.787                                        |
| NM_027340         | Lipn          | 4.783                                        |
| NM_172944         | Itgae         | 4.780                                        |
| AK007554          | 1810019N24Rik | 4.767                                        |
| NM_183039         | Defb40        | 4.760                                        |
| AK016337          | 4930580E04Rik | 4.760                                        |
| NM_001010834      | Slc10a5       | 4.754                                        |
| AK051876          | D230014I24Rik | 4.754                                        |
| NM_027222         | 2010001M09Rik | 4.717                                        |
| NM_021358         | Htr6          | 4.695                                        |
| NR_040633         | 4930555B11Rik | 4.682                                        |
| NM_001011836      | Olf1129       | 4.669                                        |
| NM_146366         | Olf1093       | 4.665                                        |
| NM_010388         | H2-DMb2       | 4.652                                        |
| NR_040596         | 4930455H04Rik | 4.643                                        |
| NM_001130444      | Hras1         | 4.640                                        |
| NR_045825         | 1700025K24Rik | 4.640                                        |
| NM_029550         | Keg1          | 4.595                                        |
| AK007098          | 1700097M23Rik | 4.592                                        |
| XM_906502         | Gm1096        | 4.569                                        |
| NM_001081954      | Dux           | 4.550                                        |

| Genbank Accession | GeneSymbol    | Fold change<br>(TiO <sub>2</sub> -H vs Sham) |
|-------------------|---------------|----------------------------------------------|
| NM_173739         | Galnt14       | 4.541                                        |
| NM_172881         | Ugt2b35       | 4.497                                        |
| NM_028584         | Marveld3      | 4.482                                        |
| NR_045810         | 4933408J17Rik | 4.432                                        |
| NM_001170632      | Fcamr         | 4.423                                        |
| NM_174846         | Glyctk        | 4.386                                        |
| NM_030610         | Fgf20         | 4.302                                        |
| NM_030728         | 9930013L23Rik | 4.296                                        |
| NM_009645         | Aicda         | 4.228                                        |
| NM_001007463      | Spag8         | 4.213                                        |
| NM_001111143      | Cym           | 4.208                                        |
| NM_153077         | Ilf10         | 4.202                                        |
| NM_020282         | Nqo2          | 4.179                                        |
| NM_031189         | Myog          | 4.167                                        |
| NM_013797         | Slc10a1       | 4.132                                        |
| AK082849          | Mcf2l         | 4.124                                        |
| XR_104924         | Gm9903        | 4.098                                        |
| NM_173379         | Leprel1       | 4.067                                        |
| AK045665          | 1700008O03Rik | 4.059                                        |
| NM_146755         | Olf551        | 4.056                                        |
| NM_013913         | Angptl3       | 4.014                                        |
| AK135677          | Gm12633       | 3.986                                        |
| AK172246          | Ipmk          | 3.953                                        |
| NM_153510         | Pilra         | 3.883                                        |
| NR_045119         | Gm18756       | 3.872                                        |
| NM_134163         | Mbnl3         | 3.866                                        |
| AK090265          | G630030J09Rik | 3.848                                        |
| AU018794          | AU018794      | 3.842                                        |
| NM_001081391      | Csmd3         | 3.826                                        |
| NM_172463         | Sned1         | 3.818                                        |
| NM_029245         | Ankrd53       | 3.771                                        |
| NM_019680         | Elf4          | 3.742                                        |
| NM_026331         | Slc25a37      | 3.732                                        |
| NM_138600         | Aldh7a1       | 3.714                                        |
| NM_029112         | Morn3         | 3.663                                        |
| AK054344          | E330017L17Rik | 3.660                                        |
| NM_001033243      | Ccdc114       | 3.658                                        |
| NM_001081388      | Rimbp2        | 3.633                                        |
| NM_001005508      | Arhgap30      | 3.615                                        |
| NM_001081127      | Adamts14      | 3.565                                        |
| NM_133226         | Pdzd3         | 3.553                                        |
| NM_028370         | Pot1b         | 3.548                                        |
| NM_007989         | Foxh1         | 3.511                                        |
| XM_621555         | Olf11175-ps   | 3.502                                        |
| AK087815          | E330024J20Rik | 3.502                                        |
| NM_022411         | Slc13a2       | 3.494                                        |
| NM_010928         | Notch2        | 3.482                                        |
| NM_001081211      | Ptafr         | 3.430                                        |
| AK005727          | 1700007J24Rik | 3.366                                        |
| NM_001033365      | Gm628         | 3.366                                        |
| NM_001034907      | Zc3h12b       | 3.350                                        |
| AK034105          | 9330156P08Rik | 3.331                                        |
| NM_021400         | Prg4          | 3.322                                        |
| NM_020574         | Kcne3         | 3.322                                        |

| Genbank Accession | GeneSymbol    | Fold change<br>(TiO <sub>2</sub> -H vs Sham) |
|-------------------|---------------|----------------------------------------------|
| NM_198961         | Vmn2r43       | 3.313                                        |
| BC116230          | Ankrd16       | 3.308                                        |
| NM_027137         | Lce1d         | 3.299                                        |
| NM_010230         | Fmn1          | 3.285                                        |
| NM_172420         | Ppp1r1c       | 3.276                                        |
| NM_010191         | Fdft1         | 3.247                                        |
| NM_001081200      | Crnn          | 3.240                                        |
| NM_001177408      | Gm15319       | 3.233                                        |
| NM_147031         | Olf1122       | 3.224                                        |
| NM_020028         | Lpar2         | 3.224                                        |
| NM_013684         | Tbp           | 3.222                                        |
| AK143978          | Frm4b         | 3.213                                        |
| NM_013501         | Cryaa         | 3.200                                        |
| XM_003084652      | LOC100502592  | 3.180                                        |
| NM_001081239      | Lilra5        | 3.165                                        |
| NM_001034859      | Gm4841        | 3.158                                        |
| NM_177353         | Slc9a7        | 3.149                                        |
| NM_213728         | Krt72-ps      | 3.102                                        |
| NM_175449         | Fam26f        | 3.089                                        |
| NM_013878         | Cabp2         | 3.089                                        |
| NM_177397         | Atp6v1g3      | 3.055                                        |
| NM_020259         | Hhip          | 3.053                                        |
| NM_001160403      | Il1rap11      | 3.031                                        |
| NM_019410         | Pfn2          | 3.023                                        |
| NM_010548         | Il10          | 3.019                                        |
| AK042649          | Gm9869        | 3.015                                        |
| NM_172603         | Phf11         | 2.986                                        |
| NM_015785         | Zpbp          | 2.975                                        |
| NM_009948         | Cpt1b         | 2.975                                        |
| NM_027600         | 4921504E06Rik | 2.971                                        |
| CB196702          | AA536887      | 2.969                                        |
| NM_021545         | Naip7         | 2.963                                        |
| NM_175362         | Card11        | 2.944                                        |
| NM_028638         | Gad11         | 2.936                                        |
| NM_008237         | Hes3          | 2.932                                        |
| NM_172799         | Till6         | 2.926                                        |
| AK155789          | Gm10802       | 2.922                                        |
| NM_145536         | BC020535      | 2.916                                        |
| NM_172807         | Ppwd1         | 2.908                                        |
| AK052659          | Gm12273       | 2.906                                        |
| NM_001013784      | E130309D14Rik | 2.890                                        |
| XR_104959         | 2310047D07Rik | 2.880                                        |
| NM_001163141      | Krtap24-1     | 2.862                                        |
| AK045799          | Fhad1         | 2.856                                        |
| NM_205795         | Mrgprb4       | 2.848                                        |
| NM_178882         | D2hgdh        | 2.834                                        |
| NM_001122899      | Lepr          | 2.815                                        |
| NM_145223         | Alms1         | 2.815                                        |
| NM_001113351      | Synj2         | 2.805                                        |
| AI853652          | D030036P13Rik | 2.803                                        |
| AK032506          | 6430573P05Rik | 2.791                                        |
| NM_008011         | Fgfr4         | 2.789                                        |
| NM_146878         | Olf30         | 2.784                                        |
| XM_916431         | Skint5        | 2.784                                        |

| Genbank Accession | GeneSymbol    | Fold change<br>(TiO <sub>2</sub> -H vs Sham) |
|-------------------|---------------|----------------------------------------------|
| AK047256          | B930042K01Rik | 2.782                                        |
| AF396877          | Dst           | 2.755                                        |
| NM_011776         | Zp3           | 2.743                                        |
| NM_020272         | Pik3cg        | 2.742                                        |
| NM_146549         | Olf786        | 2.706                                        |
| NM_001080820      | Cass4         | 2.704                                        |
| AK048022          | C130030K03Rik | 2.702                                        |
| NR_015613         | 1700029M20Rik | 2.694                                        |
| BC002139          | 1700052N19Rik | 2.680                                        |
| NM_001025353      | Gm6040        | 2.670                                        |
| NM_146559         | Olf868        | 2.667                                        |
| NM_180958         | Ccdc79        | 2.661                                        |
| NM_001099297      | Duox1         | 2.659                                        |
| NM_001034893      | Zfp936        | 2.657                                        |
| AK017177          | 5033417F24Rik | 2.652                                        |
| NM_010827         | Msc           | 2.646                                        |
| NM_172507         | Sh3bgrl2      | 2.637                                        |
| NM_010213         | Fhl3          | 2.632                                        |
| AK052165          | LOC100036540  | 2.623                                        |
| NM_026054         | 2810474O19Rik | 2.623                                        |
| AK015366          | 4930442P07Rik | 2.610                                        |
| NM_153600         | Ttc26         | 2.606                                        |
| NM_001004193      | Rhox8         | 2.603                                        |
| CD772809          | 1700092C02Rik | 2.599                                        |
| AK041682          | Pds5b         | 2.599                                        |
| NM_028918         | Ttc25         | 2.581                                        |
| NM_011891         | Sged          | 2.578                                        |
| NR_045865         | 9230009I02Rik | 2.574                                        |
| NM_133213         | Xpnpep2       | 2.570                                        |
| NM_020036         | Calm4         | 2.567                                        |
| NM_011290         | Rpl6          | 2.567                                        |
| XR_140816         | Gm9653        | 2.562                                        |
| NM_024263         | Mxra8         | 2.558                                        |
| NM_023114         | Apoc3         | 2.544                                        |
| AK020962          | B230110G15Rik | 2.532                                        |
| AK145442          | Mllt3         | 2.519                                        |
| NM_001039119      | Defb33        | 2.519                                        |
| NM_001098269      | Gm10375       | 2.518                                        |
| AK013575          | Lias          | 2.511                                        |
| XR_140805         | Gm10648       | 2.504                                        |
| NM_010730         | Anxa1         | 2.500                                        |
| AK029371          | Ablim1        | 2.474                                        |
| NR_038172         | 4931403G20Rik | 2.467                                        |
| NM_001162901      | Tmem217       | 2.467                                        |
| NM_030709         | Tmprss5       | 2.464                                        |
| NM_001163539      | 5430427O19Rik | 2.461                                        |
| NM_001081396      | Wdr67         | 2.461                                        |
| NM_183282         | Act19         | 2.452                                        |
| NM_011382         | Six4          | 2.444                                        |
| NM_028057         | Cyb5r1        | 2.437                                        |
| NM_032004         | Tssk6         | 2.425                                        |
| NM_007831         | Dcc           | 2.415                                        |
| NM_010620         | Kif15         | 2.415                                        |
| NM_029416         | Klfl7         | 2.410                                        |

| Genbank Accession | GeneSymbol    | Fold change<br>(TiO <sub>2</sub> -H vs Sham) |
|-------------------|---------------|----------------------------------------------|
| XR_141359         | 2310026122Rik | 2.407                                        |
| CF746308          | D5Buc30e      | 2.402                                        |
| NM_001013759      | Gas2l2        | 2.388                                        |
| AK144774          | Gm16686       | 2.385                                        |
| NM_201617         | Gnas          | 2.382                                        |
| NM_133207         | Kenh7         | 2.375                                        |
| AK044656          | Esyt1         | 2.351                                        |
| XR_141351         | AA667203      | 2.346                                        |
| NM_028399         | Ccnt2         | 2.329                                        |
| XM_138722         | Fam81b        | 2.328                                        |
| NM_001177630      | Etl4          | 2.323                                        |
| NM_175418         | Mybpc1        | 2.321                                        |
| NM_080729         | Il25          | 2.318                                        |
| NM_146235         | Erce6l        | 2.317                                        |
| NM_001101431      | 2510049J12Rik | 2.317                                        |
| AK144510          | 1810059H22Rik | 2.312                                        |
| NM_173416         | BC068281      | 2.309                                        |
| NR_001584         | Speer8-ps1    | 2.305                                        |
| NM_001145978      | Parp4         | 2.297                                        |
| NM_007870         | Dnase1l3      | 2.297                                        |
| AK080282          | D10ErtD755e   | 2.289                                        |
| NM_028598         | 2410076I21Rik | 2.286                                        |
| AK044654          | C230012O17Rik | 2.277                                        |
| NM_009256         | Serpib9       | 2.275                                        |
| NM_153055         | Sec63         | 2.275                                        |
| NM_001081499      | Tbc1d8b       | 2.267                                        |
| NM_028022         | Gatsl3        | 2.263                                        |
| NM_001081377      | Pcdh9         | 2.261                                        |
| NM_177866         | Catsper4      | 2.261                                        |
| AK085971          | Tbck          | 2.258                                        |
| NR_033209         | Gm4792        | 2.249                                        |
| NM_007914         | Ehf           | 2.249                                        |
| AK047818          | A730009E18Rik | 2.247                                        |
| NM_007776         | Crygd         | 2.244                                        |
| NM_001105076      | Vmn2r46       | 2.230                                        |
| NM_008455         | Klkb1         | 2.228                                        |
| NM_001205102      | Lrit3         | 2.228                                        |
| NM_199446         | Phkb          | 2.228                                        |
| NM_024438         | Dusp19        | 2.222                                        |
| NM_133239         | Crb1          | 2.219                                        |
| NM_177358         | Zfp945        | 2.219                                        |
| NM_001204233      | Spp1          | 2.219                                        |
| NM_133730         | Krt25         | 2.213                                        |
| AK042233          | A630073K07Rik | 2.213                                        |
| NM_019684         | Srpk3         | 2.213                                        |
| NM_023377         | Stard5        | 2.205                                        |
| AK018390          | 8430406P12Rik | 2.202                                        |
| NM_054066         | Plcz1         | 2.201                                        |
| XR_140553         | LOC100862344  | 2.186                                        |
| NM_007659         | Cdk1          | 2.180                                        |
| NM_001034097      | BC096441      | 2.180                                        |
| NM_153582         | Cmtm4         | 2.173                                        |
| AK051763          | 9430038I01Rik | 2.167                                        |
| AK051017          | Asb7          | 2.166                                        |

| Genbank Accession | GeneSymbol    | Fold change<br>(TiO <sub>2</sub> -H vs Sham) |
|-------------------|---------------|----------------------------------------------|
| NM_007868         | Dmd           | 2.163                                        |
| AK045831          | E230008O15Rik | 2.157                                        |
| AK038793          | Sfxn5         | 2.152                                        |
| NM_029324         | 1700018C11Rik | 2.152                                        |
| AI851140          | C130093G08Rik | 2.148                                        |
| AK141853          | 4930590A17Rik | 2.144                                        |
| NM_153137         | Traf3ip3      | 2.142                                        |
| NR_033549         | Gm11190       | 2.141                                        |
| NM_177674         | 2010015L04Rik | 2.136                                        |
| NM_001013832      | Gpr31b        | 2.133                                        |
| NM_001243760      | Ciita         | 2.132                                        |
| AK036325          | Syn3          | 2.118                                        |
| NM_177582         | Mlxip         | 2.118                                        |
| NM_178786         | Skint4        | 2.117                                        |
| NM_001081201      | Dpy19l4       | 2.111                                        |
| NM_010707         | Lgals6        | 2.108                                        |
| NM_029362         | Chmp4b        | 2.107                                        |
| NM_020519         | Slurp1        | 2.105                                        |
| NM_001195693      | Plscr5        | 2.104                                        |
| NM_009646         | Aire          | 2.102                                        |
| NM_001007222      | Tdpoz2        | 2.102                                        |
| NM_001001130      | Zfp85-rs1     | 2.101                                        |
| NM_206822         | Olfir10       | 2.099                                        |
| AK052374          | Pde3a         | 2.095                                        |
| NM_177307         | Cyp4f39       | 2.094                                        |
| NM_207683         | Pik3c2g       | 2.092                                        |
| NM_027462         | Wars2         | 2.092                                        |
| NR_002874         | Has2as        | 2.086                                        |
| AK149431          | Bhmt          | 2.086                                        |
| NM_028890         | 4931414P19Rik | 2.083                                        |
| NM_172286         | 6430548M08Rik | 2.081                                        |
| C78535            | D7ErtD183e    | 2.078                                        |
| NM_146618         | Olfir297      | 2.072                                        |
| NM_146974         | Olfir1262     | 2.071                                        |
| NM_178899         | Hepacam2      | 2.071                                        |
| NM_009965         | Cryba1        | 2.069                                        |
| NM_145229         | AY074887      | 2.068                                        |
| NM_001081012      | 4930473A06Rik | 2.066                                        |
| AK036921          | 9930024M15Rik | 2.062                                        |
| NM_008747         | Ntsr2         | 2.053                                        |
| NM_001025585      | Kcnj6         | 2.048                                        |
| NM_146042         | Rnf144b       | 2.048                                        |
| NM_015820         | Hs6st3        | 2.046                                        |
| NM_007774         | Cryga         | 2.043                                        |
| NM_170671         | Mycbpap       | 2.042                                        |
| NM_008103         | Gcm1          | 2.042                                        |
| NM_030740         | Vmn1r56       | 2.032                                        |
| NM_029315         | Pou5f2        | 2.031                                        |
| NM_174876         | Impg2         | 2.028                                        |
| NM_199364         | Lzts1         | 2.027                                        |
| AK144547          | Exoc6b        | 2.024                                        |
| AK138828          | Tdrd5         | 2.022                                        |
| NM_001038590      | Cldn19        | 2.021                                        |
| AK164818          | Slc44a1       | 2.018                                        |

| Genbank Accession | GeneSymbol    | Fold change<br>(TiO <sub>2</sub> -H vs Sham) |
|-------------------|---------------|----------------------------------------------|
| NM_029347         | Fggy          | 2.015                                        |
| NM_027630         | Ccdc105       | 2.014                                        |
| AK046275          | 4930588A03Rik | 2.010                                        |
| NM_001033769      | B020031M17Rik | 2.008                                        |
| AK139339          | Spata2l       | 2.004                                        |
| NM_016700         | Mapk8         | 2.004                                        |
| NM_008434         | Kenq1         | 2.001                                        |
| NM_010104         | Edn1          | 2.001                                        |
| AK036480          | Disp2         | 1.948                                        |
| NM_010461         | Hoxb8         | 1.945                                        |
| NM_146877         | Olf1395       | 1.939                                        |
| NM_001039658      | Mtl5          | 1.937                                        |
| NM_008879         | Lcp1          | 1.936                                        |
| NM_001033126      | Cd27          | 1.929                                        |
| NM_001025385      | Tas2r137      | 1.927                                        |
| AK041660          | D5ErtD798e    | 1.927                                        |
| BC027633          | Cd79a         | 1.925                                        |
| AK047423          | Odz1          | 1.923                                        |
| NM_001113209      | Nfib          | 1.919                                        |
| AK049967          | Myt1l         | 1.915                                        |
| NM_009010         | Rad23a        | 1.912                                        |
| NM_001077514      | Slc1a2        | 1.911                                        |
| NM_001013365      | Osm           | 1.907                                        |
| NM_183151         | Mid1          | 1.897                                        |
| NM_011347         | Selp          | 1.897                                        |
| XM_916080         | 4930438A08Rik | 1.896                                        |
| NM_008726         | Nppb          | 1.895                                        |
| NM_146513         | Olf95         | 1.891                                        |
| AK036290          | AU015680      | 1.889                                        |
| NM_001166636      | Gm4312        | 1.887                                        |
| NM_019775         | Cpb2          | 1.887                                        |
| NM_009502         | Vel           | 1.869                                        |
| NM_023821         | Cmya5         | 1.865                                        |
| NM_001163145      | 1810041L15Rik | 1.861                                        |
| AK081411          | B230216N24Rik | 1.848                                        |
| BE650233          | D9ErtD115e    | 1.847                                        |
| NR_040614         | 4930533B01Rik | 1.842                                        |
| AK049181          | Pik3c2b       | 1.834                                        |
| NM_016694         | Park2         | 1.831                                        |
| NM_028882         | Sema3d        | 1.820                                        |
| NM_009695         | Apoc2         | 1.814                                        |
| NM_029685         | 1700113H08Rik | 1.794                                        |
| AK044519          | Stard7        | 1.788                                        |
| AK016698          | 4933406K04Rik | 1.783                                        |
| NM_009767         | Chic1         | 1.781                                        |
| NR_045080         | 3300005D01Rik | 1.780                                        |
| NM_001081175      | Itpkb         | 1.774                                        |
| NM_001017427      | Rasef         | 1.769                                        |
| AK082713          | C230094B09Rik | 1.765                                        |
| NM_009035         | Rbpj          | 1.762                                        |
| NM_153079         | Nmur2         | 1.761                                        |
| NM_001169153      | Cd300lf       | 1.759                                        |
| NM_194336         | Gbp6          | 1.758                                        |
| NM_053273         | Ttyh2         | 1.747                                        |

| Genbank Accession | GeneSymbol    | Fold change<br>(TiO <sub>2</sub> -H vs Sham) |
|-------------------|---------------|----------------------------------------------|
| AK145592          | Gm10204       | 1.747                                        |
| NM_029210         | Sv2c          | 1.733                                        |
| NM_001033411      | Gm826         | 1.728                                        |
| NM_016667         | Sntb1         | 1.720                                        |
| NM_146370         | Olf47         | 1.697                                        |
| NM_023755         | Tfcp2l1       | 1.697                                        |
| NM_013877         | Cabp5         | 1.693                                        |
| BC036324          | Akna          | 1.692                                        |
| AK142040          | Gm2590        | 1.684                                        |
| AK090034          | Gm3161        | 1.677                                        |
| AK034586          | 9430011C21Rik | 1.676                                        |
| NM_019536         | Dnahc10       | 1.671                                        |
| NM_133365         | Dnahc5        | 1.670                                        |
| NM_010029         | Ddx4          | 1.668                                        |
| NM_021403         | Srrm3         | 1.659                                        |
| NM_027551         | Klhl30        | 1.657                                        |
| NM_207262         | Abpe          | 1.656                                        |
| NM_013473         | Anxa8         | 1.656                                        |
| NR_003649         | Gm5434        | 1.646                                        |
| AK165152          | Tmem29        | 1.639                                        |
| AK008925          | Mettl7a1      | 1.631                                        |
| NM_153588         | Mkl2          | 1.630                                        |
| NR_038008         | B230209K01Rik | 1.630                                        |
| NM_178662         | Atcay         | 1.628                                        |
| NM_146577         | Olf1043       | 1.627                                        |
| NM_010628         | Kif9          | 1.610                                        |
| NM_010299         | Gm2a          | 1.609                                        |
| NM_013848         | Ermap         | 1.605                                        |
| NM_001167891      | Nrg2          | 1.604                                        |
| AK002639          | Memo1         | 1.604                                        |
| NM_001012402      | Hs3st6        | 1.603                                        |
| AK083760          | Kif6          | 1.602                                        |
| NM_008664         | Myom2         | 1.601                                        |
| NM_001146007      | Trim12c       | 1.599                                        |
| XM_914998         | Gm9804        | 1.591                                        |
| NM_172418         | Mamstr        | 1.591                                        |
| NM_177340         | Synpo         | 1.588                                        |
| NM_177145         | Pde4dip       | 1.586                                        |
| NM_176965         | Efcab5        | 1.576                                        |
| NM_008895         | Pomc          | 1.576                                        |
| NR_045446         | 4933438K21Rik | 1.572                                        |
| AK088035          | C230085N15Rik | 1.569                                        |
| NM_001167581      | Gsdmcl1       | 1.568                                        |
| XM_003085800      | Gm3908        | 1.568                                        |
| NM_183183         | Gprin3        | 1.564                                        |
| AK141640          | BC055308      | 1.560                                        |
| AK035028          | Fat3          | 1.560                                        |
| NM_001174107      | Map3k9        | 1.559                                        |
| NM_026754         | Ucma          | 1.558                                        |
| NR_026561         | Gm8884        | 1.556                                        |
| NM_144940         | Uroc1         | 1.555                                        |
| AK048766          | Vps13c        | 1.555                                        |
| NM_177607         | 4933430I17Rik | 1.553                                        |
| NM_146981         | Olf1260       | 1.545                                        |

| Genbank Accession | GeneSymbol    | Fold change<br>(TiO <sub>2</sub> -H vs Sham) |
|-------------------|---------------|----------------------------------------------|
| NM_145210         | Oas1e         | 1.541                                        |
| AK048874          | Nerna00085    | 1.540                                        |
| NM_001136056      | Cntfr         | 1.538                                        |
| NM_021365         | Xlr4b         | 1.537                                        |
| AK146348          | Gm2022        | 1.535                                        |
| NM_013589         | Ltbp2         | 1.533                                        |
| NM_001134697      | Ctxn3         | 1.527                                        |
| NM_021609         | Ccbp2         | 1.526                                        |
| NM_022434         | Cyp4f14       | 1.525                                        |
| NR_040534         | Gm10548       | 1.523                                        |
| NM_144909         | Gckr          | 1.522                                        |
| NM_023476         | Tinagl1       | 1.519                                        |
| NM_001177951      | Rpgr          | 1.519                                        |
| AK084110          | D130095D21Rik | 1.506                                        |
| NR_037978         | E030025P04Rik | 1.505                                        |
| NM_172932         | Nlgn3         | 1.503                                        |
| AK045009          | B130019D13Rik | 1.501                                        |
| NM_019835         | B4galt5       | 1.500                                        |

**(B)**

| Genbank Accession | GeneSymbol    | Fold change<br>(TiO <sub>2</sub> -H vs Sham) | Genbank Accession | GeneSymbol    | Fold change<br>(TiO <sub>2</sub> -H vs Sham) |
|-------------------|---------------|----------------------------------------------|-------------------|---------------|----------------------------------------------|
| NM_012011         | Eif2s3y       | 0.002                                        | NM_001013575      | Olfir112      | 0.034                                        |
| NM_012008         | Ddx3y         | 0.005                                        | NR_003639         | 1700013N18Rik | 0.034                                        |
| NM_147099         | Olfir616      | 0.007                                        | NM_181407         | Me3           | 0.035                                        |
| NM_146693         | Olfir1462     | 0.008                                        | NM_027058         | 1700017D01Rik | 0.037                                        |
| NM_027046         | Ccdc54        | 0.009                                        | NR_003643         | 1700123L14Rik | 0.037                                        |
| NM_144936         | Tmem45b       | 0.009                                        | BG069230          | D3Ert711e     | 0.038                                        |
| NM_001011530      | Olfir723      | 0.010                                        | NM_009641         | Angpt4        | 0.039                                        |
| NR_040732         | 4833428L15Rik | 0.010                                        | NM_001085543      | Gm14347       | 0.039                                        |
| NM_175343         | Chdh          | 0.011                                        | NR_045474         | 2310081J21Rik | 0.039                                        |
| NM_001004061      | Fam170a       | 0.011                                        | NM_053088         | Ifitm5        | 0.040                                        |
| NR_028426         | Gm5129        | 0.012                                        | AK015516          | Gm10620       | 0.041                                        |
| NM_146505         | Olfir148      | 0.012                                        | AK140479          | Dnahc6        | 0.041                                        |
| NM_007704         | Inadl         | 0.012                                        | NM_008024         | Foxl1         | 0.042                                        |
| NM_008532         | Epcam         | 0.013                                        | NM_001164613      | Atp13a4       | 0.044                                        |
| NM_146254         | Wdr78         | 0.013                                        | NM_001113387      | Myl1          | 0.044                                        |
| NM_001097979      | Hist1h2bq     | 0.014                                        | NM_027397         | Isl2          | 0.045                                        |
| NM_011964         | Psg19         | 0.015                                        | NM_031368         | Bglap-rs1     | 0.045                                        |
| NM_134202         | Vmn1r233      | 0.015                                        | BC048590          | Cep120        | 0.045                                        |
| NM_025738         | Cypt1         | 0.016                                        | NR_033532         | B230206H07Rik | 0.045                                        |
| NM_033616         | Csprs         | 0.016                                        | NM_177083         | B430306N03Rik | 0.046                                        |
| NM_001160386      | Dnahc7b       | 0.017                                        | AK014721          | 4833419A21Rik | 0.046                                        |
| NM_001040089      | Rhox3f        | 0.018                                        | NM_207248         | 4930433I11Rik | 0.046                                        |
| NM_011684         | Vmn1r45       | 0.019                                        | NM_146198         | Slc5a11       | 0.046                                        |
| NM_029042         | 4930435E12Rik | 0.020                                        | NM_029959         | Lcn9          | 0.047                                        |
| NM_177841         | 4932418E24Rik | 0.022                                        | NR_040639         | Gm13490       | 0.047                                        |
| NM_181990         | Cmtm1         | 0.022                                        | AK133037          | Gm10473       | 0.047                                        |
| NM_008693         | Klk1b3        | 0.023                                        | NR_033556         | A630010A05Rik | 0.048                                        |
| NM_001256042      | Hsf4          | 0.024                                        | BC028561          | Gm568         | 0.048                                        |
| NM_009694         | Apobec2       | 0.024                                        | NM_001013765      | Zscan4c       | 0.049                                        |
| AK015323          | 4930435F18Rik | 0.024                                        | NM_009693         | Apob          | 0.049                                        |
| NM_177265         | 6330512M04Rik | 0.025                                        | AK139732          | Gm4316        | 0.049                                        |
| NM_001011532      | Olfir1037     | 0.026                                        | NM_134179         | Vmn1r23       | 0.050                                        |
| NM_031382         | Tex16         | 0.026                                        | NM_001146022      | Wdfy4         | 0.052                                        |
| NM_133698         | Hrnr          | 0.027                                        | AK028479          | Pvrl4         | 0.052                                        |
| BC042707          | Prok1         | 0.027                                        | NM_146932         | Olfir802      | 0.052                                        |
| NM_029415         | Slc10a6       | 0.027                                        | NM_033325         | Loxl2         | 0.055                                        |
| AK015488          | 4930459I23Rik | 0.027                                        | NM_001033459      | Gm1679        | 0.055                                        |
| NM_009043         | Reg2          | 0.028                                        | AK035916          | 9630017O17    | 0.056                                        |
| NM_145389         | BC016579      | 0.028                                        | NM_205821         | Mrgpra6       | 0.056                                        |
| NM_001011802      | Olfir1318     | 0.028                                        | NM_029367         | Spaca3        | 0.057                                        |
| NM_019404         | Avpr2         | 0.029                                        | AK040963          | 1700123M08Rik | 0.057                                        |
| NM_147108         | Olfir979      | 0.029                                        | NM_145713         | Hist1h1d      | 0.058                                        |
| NM_031164         | F13b          | 0.029                                        | NM_144813         | Slc24a1       | 0.059                                        |
| NM_146899         | Olfir1219     | 0.030                                        | NM_029054         | 4930443G12Rik | 0.059                                        |
| XR_140635         | Mup-ps12      | 0.030                                        | NM_001039114      | Acsbg2        | 0.060                                        |
| NM_001205037      | Gm11544       | 0.031                                        | NM_206973         | Gpr152        | 0.063                                        |
| NM_001033339      | Mmp25         | 0.031                                        | AK043688          | LOC432500     | 0.063                                        |
| XM_136255         | Gm4845        | 0.031                                        | NM_024264         | Cyp27a1       | 0.063                                        |
| NM_207176         | Tes           | 0.032                                        | NM_146284         | Olfir780      | 0.063                                        |
| NM_008205         | H2-M9         | 0.032                                        | NM_201360         | Cyp2d12       | 0.063                                        |
| NR_037997         | 2310015D24Rik | 0.033                                        | BY714998          | 4930452L12Rik | 0.064                                        |
| NM_027321         | Lrrc39        | 0.033                                        | NM_177081         | Ptpn7         | 0.064                                        |
| AK006305          | 1700024J04Rik | 0.034                                        | NM_001136181      | Hsbp111       | 0.064                                        |

| Genbank Accession | GeneSymbol    | Fold change<br>(TiO <sub>2</sub> -H vs Sham) |
|-------------------|---------------|----------------------------------------------|
| NR_045468         | 1700095A21Rik | 0.064                                        |
| AK164319          | Foxp2         | 0.065                                        |
| NM_026906         | Cts3          | 0.065                                        |
| NR_045740         | A630020A06    | 0.065                                        |
| NM_007815         | Cyp2c29       | 0.067                                        |
| NM_001083618      | Ttll9         | 0.067                                        |
| AK016012          | 4930540M05Rik | 0.068                                        |
| NM_177703         | Fbxw19        | 0.068                                        |
| AK034506          | Gm9876        | 0.070                                        |
| NM_001079929      | Ccdc154       | 0.070                                        |
| NM_001243024      | Gm3763        | 0.070                                        |
| NM_146934         | Olf46         | 0.071                                        |
| NM_027886         | Stk11ip       | 0.072                                        |
| NM_133192         | Npffr2        | 0.073                                        |
| AK041212          | Trib1         | 0.076                                        |
| NM_011406         | Slc8a1        | 0.077                                        |
| NM_008814         | Pdx1          | 0.078                                        |
| BC021607          | Akr1c20       | 0.078                                        |
| AK017087          | Cpvl          | 0.079                                        |
| NM_001081351      | A430107O13Rik | 0.079                                        |
| XR_104835         | A830029E22Rik | 0.080                                        |
| AK140217          | Fgfr3         | 0.080                                        |
| NM_010216         | Figf          | 0.080                                        |
| NM_207261         | Kcnk18        | 0.080                                        |
| BG083254          | AU015621      | 0.082                                        |
| NM_146948         | Olf342        | 0.082                                        |
| AK030033          | Gm7167        | 0.082                                        |
| NM_198711         | Col25a1       | 0.082                                        |
| BU554875          | 2010001M06Rik | 0.083                                        |
| NM_001085549      | Gm12824       | 0.083                                        |
| NM_147034         | Olf713        | 0.083                                        |
| NM_008037         | Fosl2         | 0.083                                        |
| NM_175020         | Prss58        | 0.084                                        |
| AK015532          | 4930470F04Rik | 0.084                                        |
| AK087703          | Agxt2l2       | 0.085                                        |
| NM_177744         | Apol10a       | 0.086                                        |
| NR_023846         | Peg3as        | 0.091                                        |
| CA463412          | 4933408A14Rik | 0.091                                        |
| NM_181753         | Opn5          | 0.091                                        |
| NM_008493         | Lep           | 0.092                                        |
| AK156176          | Gm10926       | 0.093                                        |
| NM_146136         | Slc16a4       | 0.093                                        |
| AK019889          | 6430710C18Rik | 0.093                                        |
| AK030805          | A730021G18Rik | 0.093                                        |
| BG075595          | AW556556      | 0.093                                        |
| NM_028784         | F13a1         | 0.094                                        |
| NM_008604         | Mme           | 0.094                                        |
| NR_034074         | Etd           | 0.094                                        |
| NM_009995         | Cyp21a1       | 0.098                                        |
| AK081233          | C030017G13Rik | 0.098                                        |
| NM_008266         | Hoxb1         | 0.100                                        |
| NM_183096         | Ttc29         | 0.100                                        |
| AK040044          | Skint10       | 0.100                                        |
| XM_001472632      | LOC100044656  | 0.104                                        |

| Genbank Accession | GeneSymbol    | Fold change<br>(TiO <sub>2</sub> -H vs Sham) |
|-------------------|---------------|----------------------------------------------|
| NM_175501         | Adamts12      | 0.105                                        |
| NM_207538         | Mrgprb5       | 0.105                                        |
| NM_008192         | Gucy2e        | 0.105                                        |
| BC023070          | 5430437J10Rik | 0.106                                        |
| XR_106339         | 4632411P08Rik | 0.106                                        |
| NM_008938         | Prph2         | 0.108                                        |
| BC132243          | 1810009J06Rik | 0.108                                        |
| AK046115          | A930016O22Rik | 0.109                                        |
| NR_045920         | 4933404G15Rik | 0.111                                        |
| XM_003086636      | Gm5737        | 0.111                                        |
| C77618            | D15Ert55e     | 0.111                                        |
| NM_008270         | Hoxb9         | 0.114                                        |
| AK077007          | 1700014D04Rik | 0.114                                        |
| NM_009285         | Stc1          | 0.114                                        |
| NM_001033455      | Ccdc27        | 0.114                                        |
| NM_026097         | Rffl          | 0.114                                        |
| AK039060          | Gm5441        | 0.116                                        |
| XM_003086830      | Gm2483        | 0.116                                        |
| NM_146305         | Olf420        | 0.121                                        |
| NR_027970         | 0610008F07Rik | 0.121                                        |
| AK076465          | Sdr16c6       | 0.122                                        |
| NM_177471         | Ccdc69        | 0.122                                        |
| NR_045360         | 2210409D07Rik | 0.123                                        |
| NM_007751         | Cox8b         | 0.123                                        |
| NM_025271         | Actl7b        | 0.124                                        |
| AK142244          | Atr           | 0.125                                        |
| U04807            | Flt3l         | 0.125                                        |
| NM_001104580      | Vmn2r116      | 0.129                                        |
| NM_001104575      | Vmn2r112      | 0.130                                        |
| NM_001013013      | Dhrs7c        | 0.131                                        |
| NR_024513         | Gm5           | 0.131                                        |
| NM_027631         | 4931407G18Rik | 0.132                                        |
| BF531481          | 2010320M18Rik | 0.132                                        |
| NM_010115         | Egfbp2        | 0.133                                        |
| NM_026105         | 1700093K21Rik | 0.136                                        |
| NM_146457         | Olf282        | 0.138                                        |
| NM_178666         | Themis        | 0.138                                        |
| NM_001037748      | LOC380994     | 0.139                                        |
| AK016151          | 4930556N08Rik | 0.139                                        |
| NM_133208         | Zfp287        | 0.139                                        |
| NM_001004194      | Nlrp4e        | 0.140                                        |
| NM_183249         | 1100001G20Rik | 0.140                                        |
| NM_007640         | Cd1d2         | 0.140                                        |
| NM_053085         | Tcf23         | 0.142                                        |
| AK005715          | 1700007H22Rik | 0.142                                        |
| NM_007511         | Atp7b         | 0.143                                        |
| AK140467          | BC048594      | 0.144                                        |
| NM_028994         | Pck2          | 0.146                                        |
| AK052613          | Dab2          | 0.146                                        |
| NM_021408         | Ush2a         | 0.148                                        |
| NM_001013751      | Syna          | 0.149                                        |
| NM_020496         | Tbx20         | 0.150                                        |
| NM_001018031      | Otol1         | 0.151                                        |
| NR_045953         | 4930432J09Rik | 0.151                                        |

| Genbank Accession | GeneSymbol    | Fold change<br>(TiO <sub>2</sub> -H vs Sham) |
|-------------------|---------------|----------------------------------------------|
| NM_134210         | Vmn1r81       | 0.151                                        |
| NM_146708         | Olf402        | 0.151                                        |
| NM_146461         | Olf1209       | 0.152                                        |
| NM_009724         | Atp4b         | 0.152                                        |
| NM_001013371      | Dtx3l         | 0.152                                        |
| NM_146050         | Oit1          | 0.152                                        |
| NM_021467         | Tnni1         | 0.154                                        |
| XM_001475533      | Olf687        | 0.155                                        |
| NM_009484         | Uty           | 0.156                                        |
| NM_028533         | 1700065D16Rik | 0.157                                        |
| AK014883          | 4921513108Rik | 0.158                                        |
| CB575032          | 2310007O11Rik | 0.158                                        |
| NM_145548         | Cyp2j13       | 0.159                                        |
| NM_001166494      | Zpbp2         | 0.159                                        |
| NM_001111318      | Cldn24        | 0.160                                        |
| NM_153106         | Padi6         | 0.160                                        |
| AK030052          | 4930455J16Rik | 0.161                                        |
| NM_172931         | Hsf3          | 0.163                                        |
| NM_010743         | Il1r1l        | 0.164                                        |
| NM_025487         | 1700011A15Rik | 0.165                                        |
| NM_001161855      | 4933416C03Rik | 0.165                                        |
| NM_020563         | Abph          | 0.166                                        |
| NR_027707         | Gm5166        | 0.167                                        |
| AK013707          | Hivep3        | 0.169                                        |
| NM_001199332      | LOC100041550  | 0.169                                        |
| NM_146623         | Olf357        | 0.169                                        |
| NM_001012766      | Ear12         | 0.170                                        |
| NM_011667         | Ube1y1        | 0.170                                        |
| NM_212487         | Krt78         | 0.170                                        |
| NM_011088         | Pira11        | 0.170                                        |
| NM_177921         | E230019M04Rik | 0.172                                        |
| NR_040327         | E130018N17Rik | 0.172                                        |
| NM_011283         | Rp1           | 0.173                                        |
| NM_028300         | Pih1d2        | 0.174                                        |
| NM_001130693      | Gucy2d        | 0.175                                        |
| NM_144906         | Sgip1         | 0.175                                        |
| NR_033584         | Gm10280       | 0.176                                        |
| AK087331          | Vps4b         | 0.176                                        |
| AI851680          | A830021K08Rik | 0.176                                        |
| NR_045878         | 9030404E10Rik | 0.176                                        |
| XR_141514         | LOC100048891  | 0.177                                        |
| NM_001166064      | Syde2         | 0.178                                        |
| NR_040462         | 1700034P13Rik | 0.179                                        |
| AK016278          | 4930572G02Rik | 0.179                                        |
| NM_008639         | Mtnr1a        | 0.180                                        |
| NM_001160265      | Cyp2w1        | 0.183                                        |
| NM_001081378      | Kidins220     | 0.183                                        |
| XM_001472451      | Gm2102        | 0.184                                        |
| AK146791          | Ewsr1         | 0.185                                        |
| NM_011800         | Cdh20         | 0.186                                        |
| AK164374          | Aldh16a1      | 0.188                                        |
| AK144269          | Lemdl         | 0.188                                        |
| NM_183104         | 4931429L15Rik | 0.188                                        |
| NM_001033461      | Lrrc43        | 0.190                                        |

| Genbank Accession | GeneSymbol    | Fold change<br>(TiO <sub>2</sub> -H vs Sham) |
|-------------------|---------------|----------------------------------------------|
| NM_030720         | Gpr84         | 0.190                                        |
| XM_001478213      | Gm7166        | 0.196                                        |
| NM_001252485      | Inca1         | 0.196                                        |
| NM_001101501      | Gm15104       | 0.197                                        |
| NM_021423         | Shank3        | 0.198                                        |
| NM_019985         | Clec1b        | 0.199                                        |
| NM_023132         | Renbp         | 0.199                                        |
| AK002748          | 0610033M10Rik | 0.200                                        |
| AK037533          | 5830408C22Rik | 0.201                                        |
| NM_001195074      | Kcnmb3        | 0.203                                        |
| AK041796          | Cog5          | 0.206                                        |
| NM_026450         | Zfp169        | 0.208                                        |
| NM_001195091      | Gm6537        | 0.209                                        |
| NM_207131         | Cebpe         | 0.211                                        |
| NM_015743         | Nr4a3         | 0.214                                        |
| NM_008596         | Sypl2         | 0.215                                        |
| NM_053130         | Pcdhb5        | 0.217                                        |
| NM_018865         | Wisp1         | 0.217                                        |
| NM_008976         | Ptpn14        | 0.218                                        |
| NR_045357         | 4930545H06Rik | 0.223                                        |
| NM_015830         | Solh          | 0.227                                        |
| NM_019809         | Pdlim5        | 0.231                                        |
| AF178753          | Olf1077-ps1   | 0.233                                        |
| NM_018738         | Igtp          | 0.233                                        |
| NM_028130         | Zfp157        | 0.233                                        |
| AK133213          | Gm13547       | 0.241                                        |
| AK050354          | Gm14168       | 0.243                                        |
| NM_001163625      | Sult6b1       | 0.244                                        |
| NM_010089         | Usp1715       | 0.246                                        |
| NM_147010         | Olf1052       | 0.249                                        |
| NM_028004         | Ttn           | 0.250                                        |
| NR_033596         | 5730416F02Rik | 0.253                                        |
| NM_008557         | Fxyd3         | 0.255                                        |
| XM_894578         | Gm6993        | 0.257                                        |
| NR_040686         | 8430423G03Rik | 0.259                                        |
| NM_144491         | Dph1          | 0.261                                        |
| XM_003086808      | LOC100040235  | 0.261                                        |
| AI604347          | Gm11570       | 0.262                                        |
| NM_009027         | Rasgrf2       | 0.263                                        |
| NM_001163810      | 1700008P20Rik | 0.264                                        |
| NM_145153         | Oas1f         | 0.264                                        |
| NM_008333         | Ifna11        | 0.269                                        |
| NM_011077         | Phex          | 0.270                                        |
| NM_021607         | Ncstn         | 0.275                                        |
| NM_009463         | Ucp1          | 0.276                                        |
| AK015936          | 4930529I22Rik | 0.280                                        |
| NR_046029         | LOC629206     | 0.282                                        |
| NM_027411         | Ccdc99        | 0.283                                        |
| NM_177335         | D930020B18Rik | 0.284                                        |
| NM_001162381      | Fam166b       | 0.284                                        |
| NM_012010         | Eif2s3x       | 0.284                                        |
| NM_011310         | S100a3        | 0.287                                        |
| NM_177233         | Fam19a4       | 0.288                                        |
| AK147615          | LOC100047044  | 0.289                                        |

| Genbank Accession | GeneSymbol    | Fold change<br>(TiO <sub>2</sub> -H vs Sham) | Genbank Accession | GeneSymbol    | Fold change<br>(TiO <sub>2</sub> -H vs Sham) |
|-------------------|---------------|----------------------------------------------|-------------------|---------------|----------------------------------------------|
| NM_001012322      | Sctr          | 0.290                                        | NM_021274         | Cxcl10        | 0.396                                        |
| NM_001033380      | Itipr12       | 0.292                                        | NM_026622         | 3110057O12Rik | 0.396                                        |
| NM_016767         | Batf          | 0.293                                        | NM_177282         | Mical2        | 0.402                                        |
| NM_008981         | Ptprg         | 0.293                                        | NM_027815         | 9030624J02Rik | 0.402                                        |
| AK161464          | A930030B08Rik | 0.295                                        | NM_023680         | Tnfrsf22      | 0.402                                        |
| NR_015604         | E130112N10Rik | 0.296                                        | AK163097          | 4933407K13Rik | 0.404                                        |
| NM_183182         | BC055111      | 0.301                                        | NM_007473         | Aqp7          | 0.404                                        |
| NM_001033785      | Akap14        | 0.302                                        | NM_008588         | Mesp1         | 0.407                                        |
| NM_027126         | Hfe2          | 0.304                                        | NM_031391         | Gtf2a1        | 0.410                                        |
| NM_001033415      | Shisa3        | 0.306                                        | NM_001012309      | Ccdc55        | 0.411                                        |
| NM_001111079      | Uhrf1         | 0.310                                        | NM_001081332      | Slc9a5        | 0.412                                        |
| NR_045743         | D930007P13Rik | 0.312                                        | NM_009701         | Aqp5          | 0.417                                        |
| NM_019448         | Dnm3l         | 0.313                                        | NM_010275         | Gdnf          | 0.422                                        |
| NM_144532         | Cabp4         | 0.315                                        | NR_045892         | Gm10538       | 0.423                                        |
| NM_007628         | Cena1         | 0.316                                        | XR_106299         | Gm7467        | 0.426                                        |
| NM_001007581      | 2810408M09Rik | 0.316                                        | NM_001114174      | Fam189a2      | 0.426                                        |
| NM_001009550      | Mup21         | 0.318                                        | BC028660          | Gm15498       | 0.427                                        |
| NM_001042653      | Oip5          | 0.320                                        | NM_028164         | 1600014C23Rik | 0.427                                        |
| NM_029714         | Catsperg2     | 0.322                                        | NM_029847         | Arsk          | 0.433                                        |
| NM_172451         | Galnt6        | 0.322                                        | NM_011176         | St14          | 0.436                                        |
| NM_182783         | Fam167b       | 0.323                                        | NM_030682         | Tlr1          | 0.438                                        |
| NR_003519         | Pisd-ps2      | 0.324                                        | NM_028873         | Dnajc14       | 0.439                                        |
| NM_008100         | Gcg           | 0.325                                        | NM_178909         | Wdr92         | 0.440                                        |
| NM_009385         | Nkx2-1        | 0.325                                        | NM_011724         | Xirp1         | 0.451                                        |
| NM_013488         | Cd4           | 0.325                                        | NM_144795         | Pycr1         | 0.451                                        |
| NM_008703         | Nmbr          | 0.326                                        | NM_001033337      | Ttc38         | 0.453                                        |
| NM_029821         | 1190003J15Rik | 0.328                                        | AK017326          | 5430420F09Rik | 0.454                                        |
| NR_028385         | Gm10190       | 0.328                                        | NM_053115         | Acox2         | 0.456                                        |
| NM_145933         | St6gal1       | 0.328                                        | NM_008184         | Gstm6         | 0.457                                        |
| BC016220          | 4930432F04Rik | 0.329                                        | NM_172610         | Mpped1        | 0.462                                        |
| NM_212473         | Fam53b        | 0.329                                        | NR_040758         | 0610040F04Rik | 0.463                                        |
| NM_144789         | Prdm15        | 0.331                                        | NM_030739         | Vmn1r58       | 0.466                                        |
| NM_011720         | Wnt8b         | 0.336                                        | AK016980          | Gm9856        | 0.468                                        |
| AK019760          | Mccc2         | 0.337                                        | NM_028608         | Glipr1        | 0.470                                        |
| NM_022311         | Tcte2         | 0.338                                        | NM_009672         | Anp32a        | 0.472                                        |
| NM_012012         | Exo1          | 0.340                                        | NM_029317         | Izumo2        | 0.472                                        |
| NM_001031621      | Abca17        | 0.341                                        | XR_035095         | 4930594M22Rik | 0.475                                        |
| NM_013731         | Sgk2          | 0.343                                        | NM_007649         | Cd48          | 0.477                                        |
| NM_207268         | Ccdc87        | 0.354                                        | NM_001033247      | Wdr52         | 0.479                                        |
| NM_174851         | Il28ra        | 0.358                                        | AK140373          | Fam196a       | 0.479                                        |
| NM_008262         | Onecut1       | 0.359                                        | NM_001033300      | Gmps          | 0.480                                        |
| NM_009422         | Traf2         | 0.361                                        | AF034610          | Nasp          | 0.480                                        |
| NM_030560         | Cwc22         | 0.366                                        | NM_019732         | Runx3         | 0.484                                        |
| NM_053075         | Rheb          | 0.367                                        | NM_172831         | E230025N22Rik | 0.487                                        |
| NM_008545         | Mageb3        | 0.369                                        | NM_029381         | Tex22         | 0.487                                        |
| NM_153502         | Ankrd23       | 0.378                                        | NM_009863         | Cdc7          | 0.488                                        |
| NM_001081174      | 6330545A04Rik | 0.379                                        | NM_009936         | Col9a3        | 0.491                                        |
| NM_007860         | Dio1          | 0.382                                        | AK179187          | Sort1         | 0.492                                        |
| AK014289          | Rbm33         | 0.384                                        | NM_010163         | Ext2          | 0.496                                        |
| NM_010207         | Fgfr2         | 0.384                                        | NM_146106         | Lyplal1       | 0.498                                        |
| NM_027444         | Bbx           | 0.388                                        | NM_008362         | Il1r1         | 0.498                                        |
| AK031795          | BB070754      | 0.389                                        | NR_015529         | R74862        | 0.500                                        |
| NM_009567         | Zfp93         | 0.389                                        | NM_001081160      | Mdga1         | 0.500                                        |
| NM_028360         | Ttc19         | 0.391                                        | NM_134095         | Pppde2        | 0.500                                        |

| Genbank Accession | GeneSymbol    | Fold change<br>(TiO <sub>2</sub> -H vs Sham) |
|-------------------|---------------|----------------------------------------------|
| NM_177759         | Ccdc60        | 0.501                                        |
| NM_001081399      | Prss33        | 0.501                                        |
| NM_172578         | Mis18bp1      | 0.501                                        |
| NM_009416         | Tpm2          | 0.502                                        |
| NM_175164         | Arhgap26      | 0.506                                        |
| NM_010558         | Ii5           | 0.525                                        |
| NM_009608         | Acte1         | 0.526                                        |
| NM_009202         | Slc22a1       | 0.529                                        |
| NM_144854         | ORF63         | 0.530                                        |
| NM_138654         | 5033411D12Rik | 0.534                                        |
| AK163481          | Kdm5b         | 0.537                                        |
| AK142889          | Pde3b         | 0.539                                        |
| NM_001205236      | Arhgap27      | 0.542                                        |
| NM_007739         | Col8a1        | 0.551                                        |
| NM_133762         | Ncapg2        | 0.556                                        |
| XM_621386         | Gm5958        | 0.562                                        |
| NM_007423         | Afp           | 0.563                                        |
| NM_009943         | Cox6a2        | 0.568                                        |
| XM_003689333      | 1810030J14Rik | 0.569                                        |
| NM_007424         | Acan          | 0.571                                        |
| NM_027057         | Wdfy1         | 0.579                                        |
| NM_022318         | Popdc2        | 0.584                                        |
| NM_009398         | Tnfaip6       | 0.586                                        |
| NM_015783         | Isg15         | 0.586                                        |
| AK078505          | Tmem220       | 0.586                                        |
| AF031663          | Strm          | 0.590                                        |
| NM_007691         | Chek1         | 0.595                                        |
| NM_029095         | Hhatf1        | 0.600                                        |
| NM_026222         | Ccdc39        | 0.603                                        |
| AK084992          | D430022A14Rik | 0.604                                        |
| NM_001113548      | Adamts15      | 0.626                                        |
| NM_001190332      | Frmd7         | 0.629                                        |
| AK015935          | Orly          | 0.634                                        |
| NM_011139         | Pou2f3        | 0.635                                        |
| NM_053247         | Lyve1         | 0.636                                        |
| NM_177190         | Tcp1l11       | 0.636                                        |
| NR_045841         | 4933407G14Rik | 0.639                                        |
| NM_001123394      | Ang3          | 0.639                                        |
| NM_009185         | Stil          | 0.639                                        |
| NM_170727         | Scgb3a1       | 0.646                                        |
| NM_001162980      | 1700024P16Rik | 0.646                                        |
| NM_009160         | Sftpd         | 0.650                                        |
| AK049968          | Anapc7        | 0.651                                        |
| NM_177200         | Svopl         | 0.652                                        |
| NM_001135093      | Klf14         | 0.654                                        |
| NM_028352         | Pgm3          | 0.658                                        |
| NM_001098267      | Ttl2          | 0.659                                        |
| NM_001159693      | Zar11         | 0.659                                        |
| NM_018746         | Itih4         | 0.661                                        |
| AK137878          | A430071A18Rik | 0.661                                        |
| NM_173429         | Zfp775        | 0.664                                        |
| NM_020033         | Ankrd2        | 0.665                                        |
