# Supplementary material for: Effects of Prenatal Exposure to Titanium Dioxide Nanoparticles on DNA Methylation and Gene Expression Profile in the Mouse Brain
Source: PubMed Central journal article supplement (PMC8915839; doi:10.3389/ftox.2021.705910), 2021-10-08
Supplement: Table9.pdf [file Table9.pdf]

**Supplementary Table 9**

The mRNAs that expression levels were increased (A:  $\geq 1.5$ -fold) or decreased (B:  $\leq 0.67$ -fold) by prenatal TiO<sub>2</sub>-NP treatment in the brain of female offspring determined by SurePrint G3 Mouse GE 8 × 60 K Microarray.

**(A)**

| Genbank Accession | GeneSymbol    | Fold change<br>(TiO <sub>2</sub> -H vs Sham) | Genbank Accession | GeneSymbol    | Fold change<br>(TiO <sub>2</sub> -H vs Sham) |
|-------------------|---------------|----------------------------------------------|-------------------|---------------|----------------------------------------------|
| NM_008029         | Flt4          | 49.351                                       | NM_021380         | Il20          | 9.931                                        |
| AK046830          | Prune2        | 44.170                                       | NR_045157         | Gm7008        | 9.500                                        |
| NM_181276         | Tas2r136      | 43.956                                       | NM_012011         | Eif2s3y       | 9.448                                        |
| NR_040476         | 4930565N06Rik | 37.401                                       | NM_146956         | Olfir525      | 9.363                                        |
| BQ554617          | AI317158      | 31.845                                       | NR_015488         | A930003A15Rik | 9.260                                        |
| NM_029499         | Ms4a4c        | 30.232                                       | XM_001475415      | Gm7972        | 9.221                                        |
| NM_019486         | Olfir71       | 26.909                                       | NM_001011854      | Olfir605      | 9.190                                        |
| NM_177187         | D5Ert577e     | 22.959                                       | NM_008030         | Fmo3          | 9.151                                        |
| NM_146666         | Olfir736      | 22.131                                       | AK080381          | 9330175E14Rik | 9.032                                        |
| XR_001634         | 1700007E05Rik | 22.009                                       | NM_001167587      | Gm5916        | 8.889                                        |
| NR_040317         | A730082K24Rik | 21.437                                       | NM_146370         | Olfir47       | 8.889                                        |
| AK045043          | Usp24         | 21.288                                       | XM_003689006      | LOC100861888  | 8.834                                        |
| AK006214          | 1700029115Rik | 21.039                                       | NM_008040         | Fpr-rs3       | 8.754                                        |
| AK015322          | 4933409F18Rik | 20.778                                       | NM_001034100      | Gm5382        | 8.736                                        |
| NM_199471         | Prss43        | 20.043                                       | NM_177243         | Slc26a9       | 8.694                                        |
| AK006790          | Hrasls5       | 19.522                                       | NM_178793         | Ccbe1         | 8.682                                        |
| NM_134253         | Bnipl         | 18.494                                       | NM_001163810      | 1700008P20Rik | 8.568                                        |
| NM_015767         | Ttpa          | 17.914                                       | NM_172420         | Ppp1r1c       | 8.497                                        |
| NM_008941         | Tmprss15      | 17.765                                       | NM_146535         | Olfir1370     | 8.282                                        |
| NM_018795         | Abcc6         | 17.160                                       | NM_011718         | Wnt10b        | 8.259                                        |
| NM_147028         | Olfir1124     | 16.235                                       | NM_001166030      | Mylk4         | 8.174                                        |
| NM_134210         | Vmn1r81       | 16.178                                       | NM_009123         | Nkx1-2        | 8.157                                        |
| NM_027031         | Efcab9        | 15.934                                       | XM_003086808      | LOC100040235  | 8.089                                        |
| NM_001163486      | Hsd17b13      | 15.617                                       | NM_032394         | Myo7b         | 8.056                                        |
| NM_001085529      | Slc2a7        | 15.064                                       | NM_028025         | Mageb16       | 7.994                                        |
| NM_134170         | Vmn1r32       | 13.842                                       | NM_173395         | Fam132b       | 7.994                                        |
| NM_207664         | Olfir151      | 13.652                                       | NM_009484         | Uty           | 7.983                                        |
| NM_009043         | Reg2          | 13.623                                       | AK044339          | Esrb          | 7.945                                        |
| BC044848          | Dsg2          | 13.408                                       | NM_177905         | Piwil4        | 7.912                                        |
| AK085162          | D430047D06Rik | 12.951                                       | NM_146532         | Olfir1170     | 7.895                                        |
| NM_008263         | Hoxa10        | 12.737                                       | NM_176950         | Defb20        | 7.722                                        |
| XR_141471         | Gm17739       | 12.562                                       | NM_175531         | Mrgprb2       | 7.642                                        |
| BU962902          | 4930548J01Rik | 12.553                                       | NM_010871         | Naip6         | 7.621                                        |
| NM_001244654      | Gm9573        | 12.252                                       | NM_013728         | Olfir154      | 7.418                                        |
| NM_001029893      | Psg26         | 12.193                                       | NM_001039048      | Trim63        | 7.408                                        |
| NM_001201390      | E330021D16Rik | 12.176                                       | NM_183249         | 1100001G20Rik | 7.387                                        |
| NM_146831         | Olfir133      | 12.176                                       | NM_008412         | Ivl           | 7.270                                        |
| NM_029230         | 4930564B18Rik | 11.794                                       | NM_001001488      | Atp8b1        | 7.235                                        |
| XM_003085466      | LOC100039675  | 11.729                                       | NM_138750         | Prom2         | 7.200                                        |
| NM_001001332      | BC117090      | 11.632                                       | NM_001199332      | LOC100041550  | 7.180                                        |
| NM_012008         | Ddx3y         | 11.416                                       | NM_199155         | Tas2r110      | 7.170                                        |
| NM_009971         | Csf3          | 11.081                                       | NR_045343         | E030044B06Rik | 7.130                                        |
| NM_033616         | Csprs         | 10.951                                       | AK047340          | Myh10         | 7.106                                        |
| NM_172509         | Kctd7         | 10.808                                       | NM_001011797      | Olfir782      | 7.032                                        |
| NM_001142539      | Gm9992        | 10.800                                       | AK039149          | Plcd4         | 6.940                                        |
| NM_001081372      | Ces1b         | 10.549                                       | NM_028545         | 1700055N04Rik | 6.854                                        |
| NM_147111         | Olfir586      | 10.476                                       | NM_147037         | Olfir1413     | 6.850                                        |
| NM_008089         | Gata1         | 10.469                                       | NM_203396         | Fam115e       | 6.816                                        |
| NM_153052         | Gzmn          | 10.239                                       | NM_025763         | 4933436I01Rik | 6.816                                        |
| NR_040493         | 2410088K16Rik | 9.987                                        | NM_001005858      | I830012O16Rik | 6.769                                        |

| Genbank Accession | GeneSymbol    | Fold change<br>(TiO <sub>2</sub> -H vs Sham) |
|-------------------|---------------|----------------------------------------------|
| NR_033523         | Gm11517       | 6.751                                        |
| NR_040327         | E130018N17Rik | 6.690                                        |
| NM_146989         | Olf1496       | 6.653                                        |
| NM_001012434      | Kctd14        | 6.644                                        |
| NM_001167757      | Ankrd7        | 6.644                                        |
| NM_001252513      | Lipi          | 6.575                                        |
| NM_146367         | Olf1976       | 6.561                                        |
| NM_175449         | Fam26f        | 6.539                                        |
| NM_029901         | Akr1c21       | 6.534                                        |
| NM_020595         | Otor          | 6.485                                        |
| XM_003689228      | LOC100862035  | 6.485                                        |
| NM_172824         | Ccdc14        | 6.480                                        |
| NM_008361         | I11b          | 6.449                                        |
| NM_030614         | Fgf16         | 6.382                                        |
| NM_001025585      | Kcnj6         | 6.342                                        |
| NM_205783         | Chrm5         | 6.285                                        |
| NM_019475         | Olf157        | 6.281                                        |
| NM_177901         | 4933402J07Rik | 6.233                                        |
| NM_001005485      | Olf111        | 6.225                                        |
| NR_028384         | 4930528A17Rik | 6.212                                        |
| NM_001166712      | Vmn1r151      | 6.207                                        |
| NM_019918         | Vmn2r1        | 6.160                                        |
| AK051627          | Arvcf         | 6.114                                        |
| AK143941          | 1700001D01Rik | 6.101                                        |
| NM_001043322      | Fmn1          | 6.017                                        |
| AK042233          | A630073K07Rik | 6.004                                        |
| NM_146440         | Olf1919       | 5.909                                        |
| NM_138630         | Arhgap4       | 5.905                                        |
| NM_199150         | BC049730      | 5.844                                        |
| NM_010759         | Mageb1        | 5.840                                        |
| NM_146959         | Olf1631       | 5.760                                        |
| AK033147          | 1010001N08Rik | 5.748                                        |
| NM_001130412      | Lpin1         | 5.704                                        |
| AK030470          | 3110054G05Rik | 5.700                                        |
| NM_010493         | Icam1         | 5.700                                        |
| NM_001014997      | Gm156         | 5.688                                        |
| NM_001199347      | Foxp3         | 5.684                                        |
| AK146705          | Filip11       | 5.657                                        |
| NR_045930         | 1700092K14Rik | 5.629                                        |
| NM_030711         | Erap1         | 5.622                                        |
| NM_175731         | Acer1         | 5.598                                        |
| NM_177335         | D930020B18Rik | 5.548                                        |
| NR_045456         | C330013F16Rik | 5.540                                        |
| NM_178780         | Ric3          | 5.438                                        |
| XM_986980         | Gm8359        | 5.434                                        |
| NM_001085503      | Aadacl3       | 5.419                                        |
| NM_172932         | Nlgn3         | 5.374                                        |
| XR_142383         | LOC664934     | 5.359                                        |
| NM_010558         | I15           | 5.322                                        |
| NM_146543         | Olf1360       | 5.318                                        |
| XR_104604         | 1700029M03Rik | 5.300                                        |
| NM_017371         | Hpx           | 5.271                                        |
| NM_023370         | Cdh23         | 5.267                                        |
| NM_199059         | Tbpl2         | 5.242                                        |

| Genbank Accession | GeneSymbol    | Fold change<br>(TiO <sub>2</sub> -H vs Sham) |
|-------------------|---------------|----------------------------------------------|
| NM_001081211      | Ptafr         | 5.195                                        |
| NM_011667         | Ubely1        | 5.195                                        |
| NM_001161765      | Fmo5          | 5.191                                        |
| NM_147114         | Olf1575       | 5.152                                        |
| NM_001159693      | Zar11         | 5.116                                        |
| NM_009170         | Shh           | 5.095                                        |
| AK034192          | Gm4491        | 4.986                                        |
| NM_181579         | Pof1b         | 4.986                                        |
| AK155776          | Tet2          | 4.959                                        |
| NM_147099         | Olf1616       | 4.938                                        |
| XR_105027         | A230083G16Rik | 4.935                                        |
| NM_172842         | Lax1          | 4.931                                        |
| NM_028529         | Nipsnap3a     | 4.918                                        |
| NM_001039889      | Smok3b        | 4.897                                        |
| NR_027806         | Pea15b        | 4.894                                        |
| NM_009220         | Sstyl         | 4.887                                        |
| NM_001042503      | Trim71        | 4.867                                        |
| NM_011294         | Sub1          | 4.857                                        |
| AK008836          | 2210406H18Rik | 4.843                                        |
| NM_001167937      | D6Ertd527e    | 4.780                                        |
| NM_201530         | Sly           | 4.777                                        |
| NM_146369         | Olf1434       | 4.773                                        |
| NM_001033541      | Gm5127        | 4.757                                        |
| NM_026105         | 1700093K21Rik | 4.737                                        |
| NM_001037748      | LOC380994     | 4.698                                        |
| NM_021517         | Pdzk1         | 4.695                                        |
| NM_010464         | Hoxc13        | 4.643                                        |
| NM_001001809      | Olf1218       | 4.640                                        |
| NM_199306         | Wdte1         | 4.630                                        |
| NM_030237         | Spz1          | 4.630                                        |
| NR_003648         | Gm5334        | 4.620                                        |
| AK080367          | A630076J17Rik | 4.576                                        |
| NM_001011818      | Olf1316       | 4.573                                        |
| NM_001081070      | Pdia2         | 4.563                                        |
| NM_009307         | Syt2          | 4.560                                        |
| NM_181853         | Trim66        | 4.554                                        |
| AK017398          | 5430435K18Rik | 4.554                                        |
| BY709204          | Gm11266       | 4.541                                        |
| NM_019473         | Olf155        | 4.538                                        |
| AK037495          | 1810062O18Rik | 4.519                                        |
| NM_146925         | Olf1481       | 4.510                                        |
| NR_030763         | Smok4a        | 4.506                                        |
| NM_145383         | Rho           | 4.485                                        |
| AK052446          | Pigv          | 4.475                                        |
| NM_011426         | Siglec1       | 4.457                                        |
| NM_029264         | Tll110        | 4.448                                        |
| NM_030192         | 4930562C15Rik | 4.392                                        |
| AK021049          | C030006F08Rik | 4.392                                        |
| NM_001004157      | Scarf1        | 4.386                                        |
| NM_146654         | Olf1237-ps1   | 4.386                                        |
| NM_207687         | Espn          | 4.380                                        |
| AK142706          | D830050J10Rik | 4.377                                        |
| NM_147023         | Olf1385       | 4.368                                        |
| XR_142242         | Gm10610       | 4.341                                        |

| Genbank Accession | GeneSymbol    | Fold change<br>(TiO <sub>2</sub> -H vs Sham) |
|-------------------|---------------|----------------------------------------------|
| NR_033171         | Ppp1r2-ps9    | 4.338                                        |
| NM_172955         | Vcan          | 4.323                                        |
| XR_140495         | Gm10846       | 4.317                                        |
| NM_028938         | Lrriq3        | 4.296                                        |
| XM_885719         | Pramel        | 4.275                                        |
| NM_001080934      | Slc16a5       | 4.260                                        |
| NM_001011733      | Olf288        | 4.257                                        |
| XR_002334         | Lrrc31        | 4.222                                        |
| NM_028905         | 4932438H23Rik | 4.216                                        |
| NM_028370         | Pot1b         | 4.190                                        |
| NR_045741         | Gm10432       | 4.158                                        |
| NM_008352         | Il12b         | 4.150                                        |
| NM_001081363      | Cenpf         | 4.147                                        |
| NM_181549         | Clec18a       | 4.147                                        |
| NM_030699         | Ntng1         | 4.141                                        |
| NM_026915         | Lyzl4         | 4.135                                        |
| NM_177607         | 4933430117Rik | 4.135                                        |
| BC030499          | BC030499      | 4.124                                        |
| AK053536          | E130106K03Rik | 4.124                                        |
| NM_177839         | Tnn           | 4.115                                        |
| NM_026806         | Klk5          | 4.112                                        |
| NM_145126         | Chi314        | 4.107                                        |
| AK143876          | Gm10603       | 4.084                                        |
| NR_015567         | A930007119Rik | 4.061                                        |
| NM_001100616      | Vmn2r121      | 4.059                                        |
| NM_146746         | Olf935        | 4.056                                        |
| NR_033618         | 1700128F08Rik | 4.053                                        |
| XM_912668         | Gm16486       | 4.053                                        |
| NM_026296         | 4930548H24Rik | 4.053                                        |
| NM_134202         | Vmn1r233      | 4.045                                        |
| NM_147026         | Olf532        | 4.036                                        |
| AK141472          | Asx13         | 4.025                                        |
| NM_008092         | Gata4         | 4.011                                        |
| NM_028994         | Pck2          | 3.994                                        |
| NM_001099313      | Gm11554       | 3.989                                        |
| NM_177661         | C130079G13Rik | 3.964                                        |
| NR_045810         | 4933408J17Rik | 3.948                                        |
| AK162913          | Pigu          | 3.942                                        |
| NM_001102665      | Gm14920       | 3.939                                        |
| NM_009509         | Vil1          | 3.937                                        |
| XR_140696         | Gm3527        | 3.934                                        |
| NM_013464         | Ahr           | 3.926                                        |
| AK006604          | Gm9558        | 3.915                                        |
| NM_010450         | Hoxa11        | 3.885                                        |
| NM_175495         | Gpr150        | 3.880                                        |
| NM_001033424      | Fnd3c2        | 3.837                                        |
| NM_153098         | Cd109         | 3.832                                        |
| AK166451          | Gm10661       | 3.808                                        |
| NM_029116         | Kbtbd11       | 3.795                                        |
| XR_106400         | Gm11538       | 3.789                                        |
| AK146348          | Gm2022        | 3.784                                        |
| AK132758          | Gm10741       | 3.769                                        |
| AK044519          | Stard7        | 3.769                                        |
| NR_045713         | 4930529F24Rik | 3.750                                        |

| Genbank Accession | GeneSymbol    | Fold change<br>(TiO <sub>2</sub> -H vs Sham) |
|-------------------|---------------|----------------------------------------------|
| AK015935          | Orly          | 3.724                                        |
| NM_025751         | 4933425L06Rik | 3.724                                        |
| AK041796          | Cog5          | 3.724                                        |
| AK143754          | Gm4466        | 3.711                                        |
| AK149136          | Col19a1       | 3.694                                        |
| NM_001160142      | LOC100041256  | 3.694                                        |
| NM_030739         | Vmn1r58       | 3.686                                        |
| BC011338          | Birc3         | 3.686                                        |
| BF139390          | Igkv4-53      | 3.673                                        |
| XR_105111         | Gm2788        | 3.665                                        |
| U04807            | Flt3l         | 3.655                                        |
| NM_011146         | Pparg         | 3.653                                        |
| AK078505          | Tmem220       | 3.650                                        |
| NM_001031851      | Agxt2         | 3.625                                        |
| AK039419          | A330041K01    | 3.623                                        |
| XR_142440         | LOC100048661  | 3.615                                        |
| NM_053103         | Entpd7        | 3.598                                        |
| AK048775          | C230060E24    | 3.585                                        |
| NM_008367         | Il2ra         | 3.580                                        |
| XM_886739         | Gm6310        | 3.575                                        |
| NM_001033437      | Gm889         | 3.568                                        |
| NM_001033547      | 4922505E12Rik | 3.526                                        |
| NM_030726         | Mrgprh        | 3.519                                        |
| NM_146050         | Oit1          | 3.519                                        |
| AK155135          | Dfna5         | 3.519                                        |
| NM_027902         | Tmprss6       | 3.506                                        |
| NM_026449         | Galnt15       | 3.502                                        |
| NM_013542         | Gzmb          | 3.497                                        |
| NR_045086         | AW495222      | 3.485                                        |
| NM_026335         | Lce1h         | 3.480                                        |
| NR_036598         | 6030440G07Rik | 3.480                                        |
| NM_016775         | Dnajc5        | 3.477                                        |
| NM_011523         | Synj2         | 3.461                                        |
| NM_181849         | Fgb           | 3.461                                        |
| NR_027824         | Gm13749       | 3.458                                        |
| NM_010866         | Myod1         | 3.446                                        |
| NM_001034893      | Zfp936        | 3.444                                        |
| BC026871          | Rftn2         | 3.441                                        |
| XM_003085596      | LOC100504642  | 3.441                                        |
| NM_012010         | Eif2s3x       | 3.439                                        |
| NM_020015         | Magea1        | 3.422                                        |
| AK172643          | Tmed5         | 3.415                                        |
| NR_027915         | 1700120K04Rik | 3.415                                        |
| NR_015540         | 4933400F21Rik | 3.406                                        |
| BC080727          | Gm5589        | 3.406                                        |
| NM_010125         | Elf5          | 3.389                                        |
| BI852147          | AI463170      | 3.373                                        |
| AK016698          | 4933406K04Rik | 3.354                                        |
| NR_040547         | 4930509J09Rik | 3.352                                        |
| NM_001128103      | Ano3          | 3.350                                        |
| NM_001170935      | BC005764      | 3.345                                        |
| NM_013482         | Btk           | 3.343                                        |
| NM_001102563      | Prnt2         | 3.343                                        |
| NM_153801         | Tecl1         | 3.322                                        |

| Genbank Accession | GeneSymbol    | Fold change<br>(TiO <sub>2</sub> -H vs Sham) |
|-------------------|---------------|----------------------------------------------|
| AK030628          | Cwc25         | 3.306                                        |
| NM_015743         | Nr4a3         | 3.304                                        |
| NM_001159775      | Olf391-ps     | 3.297                                        |
| NM_030098         | Rnase6        | 3.288                                        |
| AK038843          | 9630028I04Rik | 3.260                                        |
| AK035285          | Ppp1r12b      | 3.200                                        |
| NM_008645         | Mug1          | 3.184                                        |
| NM_019544         | Msgn1         | 3.169                                        |
| NM_172578         | Mis18bp1      | 3.158                                        |
| NM_027382         | Hdac8         | 3.134                                        |
| NM_080467         | Atp6v0a4      | 3.117                                        |
| NM_001190332      | Frmf7         | 3.078                                        |
| NM_153600         | Ttc26         | 3.053                                        |
| NM_020277         | Trpm5         | 3.050                                        |
| NM_177755         | Klhl38        | 3.031                                        |
| NM_021609         | Cebp2         | 3.029                                        |
| NM_178720         | Zpld1         | 3.021                                        |
| NM_001025353      | Gm6040        | 3.008                                        |
| NM_010502         | Ifna1         | 3.006                                        |
| AK158670          | Gm10199       | 2.998                                        |
| NM_183161         | Slc17a9       | 2.996                                        |
| NM_001039652      | Oprm1         | 2.990                                        |
| AK134268          | Tmem87a       | 2.983                                        |
| NM_001033415      | Shisa3        | 2.975                                        |
| NR_046060         | 4930478P22Rik | 2.973                                        |
| NM_001134299      | Gm10220       | 2.953                                        |
| NM_001004142      | Nlrp1a        | 2.942                                        |
| NM_008522         | Ltf           | 2.932                                        |
| AK032648          | Pde4d         | 2.912                                        |
| XM_357111         | Gm5258        | 2.892                                        |
| NM_001110320      | Cd72          | 2.884                                        |
| NM_177025         | Cobll1        | 2.882                                        |
| NM_001162945      | Mtx3          | 2.882                                        |
| NM_134195         | Vmn1r227      | 2.880                                        |
| AK041925          | Svil          | 2.876                                        |
| NR_003619         | 6330549D23Rik | 2.872                                        |
| NM_013622         | Oprd1         | 2.870                                        |
| AK031407          | 1700028E10Rik | 2.856                                        |
| NM_028051         | Slc39a5       | 2.854                                        |
| NM_181277         | Col14a1       | 2.840                                        |
| NM_138654         | 5033411D12Rik | 2.830                                        |
| NM_146618         | Olf297        | 2.817                                        |
| NM_010410         | Hert          | 2.803                                        |
| XM_001481329      | Spnb5         | 2.789                                        |
| NM_198193         | Raet1e        | 2.774                                        |
| NM_001172147      | Rbm41         | 2.772                                        |
| NM_009118         | Sag           | 2.770                                        |
| NM_001081320      | Cyb561d1      | 2.751                                        |
| NM_001173553      | Cdc14a        | 2.749                                        |
| NM_011910         | Uts2          | 2.715                                        |
| NM_033325         | Loxl2         | 2.704                                        |
| NM_018738         | Igtp          | 2.691                                        |
| AK163441          | Csnk1g3       | 2.683                                        |
| AK050478          | Nnt           | 2.661                                        |

| Genbank Accession | GeneSymbol    | Fold change<br>(TiO <sub>2</sub> -H vs Sham) |
|-------------------|---------------|----------------------------------------------|
| NM_007956         | Esr1          | 2.656                                        |
| AK155789          | Gm10802       | 2.648                                        |
| NM_174876         | Impg2         | 2.646                                        |
| NM_019821         | Gltf          | 2.645                                        |
| NR_045997         | 1700113A16Rik | 2.643                                        |
| NM_178258         | Il22ra2       | 2.626                                        |
| AK165082          | 2700007P21Rik | 2.615                                        |
| NM_146904         | Olf870        | 2.614                                        |
| NM_001039188      | Rreb1         | 2.608                                        |
| XR_035409         | Gm6653        | 2.606                                        |
| NM_175526         | Clec1a        | 2.603                                        |
| NM_021409         | Pard6b        | 2.603                                        |
| NM_020576         | Psors1c2      | 2.595                                        |
| NM_177307         | Cyp4f39       | 2.594                                        |
| AK021017          | B430105A11Rik | 2.594                                        |
| NM_145073         | Hist1h3g      | 2.588                                        |
| NM_052977         | Adarb2        | 2.586                                        |
| NM_031255         | Rsph6a        | 2.583                                        |
| NM_027089         | 4930579C15Rik | 2.576                                        |
| NM_015770         | a             | 2.565                                        |
| CB202205          | AI449212      | 2.562                                        |
| NM_001145637      | Gm1661        | 2.558                                        |
| NM_001190374      | Adamts13      | 2.554                                        |
| AK044320          | Ocr1          | 2.547                                        |
| NM_001193305      | Mical2        | 2.542                                        |
| AK090292          | Zfp53         | 2.542                                        |
| AK020289          | 9130230N09Rik | 2.521                                        |
| NM_013875         | Pde7b         | 2.521                                        |
| AK140520          | Fam5c         | 2.514                                        |
| AK047378          | Chst10        | 2.509                                        |
| XM_357051         | Ms4a14        | 2.509                                        |
| XR_105476         | Gm9548        | 2.507                                        |
| AK051017          | Asb7          | 2.498                                        |
| NM_001128090      | Rergl         | 2.483                                        |
| NM_009132         | Scin          | 2.479                                        |
| NM_010427         | Hgf           | 2.469                                        |
| AK080282          | D10Ertd755e   | 2.466                                        |
| BC171937          | Hemt1         | 2.461                                        |
| NM_145933         | St6gal1       | 2.452                                        |
| NM_172783         | Phka2         | 2.449                                        |
| NM_001081298      | Lphn2         | 2.442                                        |
| XM_003085861      | Gm9979        | 2.440                                        |
| NM_175681         | Glp2r         | 2.437                                        |
| AK021252          | C430045I18Rik | 2.432                                        |
| AK031900          | Adamts3       | 2.430                                        |
| NM_030022         | Grifin        | 2.428                                        |
| NM_001163638      | Ttc18         | 2.402                                        |
| NM_009827         | Cckar         | 2.400                                        |
| NM_010469         | Hoxd4         | 2.395                                        |
| NM_152803         | Hpse          | 2.393                                        |
| XM_987873         | 6530409C15Rik | 2.385                                        |
| NM_001081428      | Fam184a       | 2.380                                        |
| AK020028          | 5930409G06Rik | 2.380                                        |
| NM_007537         | Bcl2l2        | 2.380                                        |

| Genbank Accession | GeneSymbol    | Fold change<br>(TiO <sub>2</sub> -H vs Sham) |
|-------------------|---------------|----------------------------------------------|
| NM_010264         | Nr6a1         | 2.373                                        |
| XM_622784         | Olf1358       | 2.365                                        |
| AK046843          | 9130004C02Rik | 2.365                                        |
| AK021326          | D730003K21Rik | 2.365                                        |
| NM_008469         | Krt15         | 2.362                                        |
| AK083890          | D130051D11Rik | 2.357                                        |
| NM_001013759      | Gas2l2        | 2.347                                        |
| NM_010059         | Dmc1          | 2.333                                        |
| NM_015796         | Fbxo17        | 2.333                                        |
| NM_026357         | Ribe2         | 2.326                                        |
| NM_001097644      | Ccnyl1        | 2.326                                        |
| NM_010551         | Il16          | 2.323                                        |
| NM_001190914      | Kirrel3       | 2.317                                        |
| NM_146359         | Olf1564       | 2.313                                        |
| NM_008008         | Fgf7          | 2.304                                        |
| NM_027717         | Dydc2         | 2.301                                        |
| NM_146235         | Ercc6l        | 2.297                                        |
| AK046639          | Eif4g3        | 2.297                                        |
| NM_011134         | Pon1          | 2.297                                        |
| NM_011485         | Star          | 2.293                                        |
| NM_028967         | Batf2         | 2.289                                        |
| AK034105          | 9330156P08Rik | 2.286                                        |
| NM_010009         | Cyp27b1       | 2.280                                        |
| AK046275          | 4930588A03Rik | 2.278                                        |
| XR_140624         | Gm2401        | 2.270                                        |
| AK028444          | 4631405J19Rik | 2.270                                        |
| XR_107893         | LOC100504965  | 2.267                                        |
| NM_008334         | Ifna7         | 2.264                                        |
| NM_207262         | Abpe          | 2.263                                        |
| NM_001110240      | Slc24a2       | 2.258                                        |
| NM_028540         | 1700057K13Rik | 2.252                                        |
| AK035822          | D2Ert295e     | 2.242                                        |
| NM_177382         | Cyp2r1        | 2.235                                        |
| AK162820          | P2rx4         | 2.233                                        |
| AK017326          | 5430420F09Rik | 2.230                                        |
| NM_019474         | Olf156        | 2.227                                        |
| NM_145229         | AY074887      | 2.215                                        |
| NR_033538         | Gm10421       | 2.215                                        |
| NM_022721         | Fzd5          | 2.213                                        |
| NM_146974         | Olf1262       | 2.208                                        |
| NM_027967         | 1700026J04Rik | 2.204                                        |
| AK083592          | BB217526      | 2.202                                        |
| NM_016694         | Park2         | 2.193                                        |
| NM_001166206      | Erv3          | 2.192                                        |
| XR_104907         | B230104I21Rik | 2.187                                        |
| NM_010024         | Dct           | 2.178                                        |
| NR_045458         | 4933433H22Rik | 2.178                                        |
| NM_001039502      | Krtap1-4      | 2.172                                        |
| NM_023380         | Samsn1        | 2.170                                        |
| AK041747          | Harbi1        | 2.164                                        |
| NM_001172123      | Rbms3         | 2.158                                        |
| NR_045047         | 2810011L19Rik | 2.154                                        |
| NM_007831         | Dcc           | 2.151                                        |
| NM_001195693      | Plscr5        | 2.149                                        |

| Genbank Accession | GeneSymbol    | Fold change<br>(TiO <sub>2</sub> -H vs Sham) |
|-------------------|---------------|----------------------------------------------|
| CA463412          | 4933408A14Rik | 2.144                                        |
| AK076446          | Tmem175       | 2.136                                        |
| AK029603          | Zhx3          | 2.136                                        |
| NM_001085504      | Gm436         | 2.136                                        |
| NM_001160265      | Cyp2w1        | 2.135                                        |
| NM_028352         | Pgm3          | 2.132                                        |
| NM_001172074      | 3110009E18Rik | 2.127                                        |
| NM_001011519      | Olf1148       | 2.126                                        |
| XR_140426         | Gm10568       | 2.123                                        |
| AK031183          | 3010001F23Rik | 2.104                                        |
| NM_007868         | Dmd           | 2.101                                        |
| NM_001164466      | Dpys          | 2.097                                        |
| NM_133984         | Hemk1         | 2.094                                        |
| NM_031389         | Nlrp4c        | 2.089                                        |
| NM_008074         | Gabrg3        | 2.085                                        |
| NR_038008         | B230209K01Rik | 2.083                                        |
| AK170575          | Arhgap6       | 2.082                                        |
| NM_009259         | Spn           | 2.078                                        |
| NM_144515         | Zfp52         | 2.076                                        |
| NM_172622         | Trerfl        | 2.075                                        |
| NM_023631         | Aox4          | 2.073                                        |
| BG081747          | AU023639      | 2.073                                        |
| NM_001081407      | Plb1          | 2.066                                        |
| NM_009767         | Chic1         | 2.065                                        |
| NM_027649         | Spats1        | 2.059                                        |
| NM_001163502      | C130039O16Rik | 2.056                                        |
| NM_001081050      | Pard3b        | 2.041                                        |
| AK049967          | Myt1l         | 2.038                                        |
| NM_013724         | Nrk           | 2.035                                        |
| AK033281          | Cep250        | 2.032                                        |
| NM_008961         | Pter          | 2.029                                        |
| NM_001004193      | Rhox8         | 2.028                                        |
| AK137878          | A430071A18Rik | 2.025                                        |
| NM_183025         | A430033K04Rik | 2.021                                        |
| NM_001113530      | Csf1          | 2.020                                        |
| NM_172874         | Podn          | 2.015                                        |
| NM_025506         | Riiad1        | 2.007                                        |
| BC100427          | Gm10037       | 2.003                                        |
| NM_181419         | Zfp599        | 2.001                                        |
| NM_001205102      | Lrit3         | 1.993                                        |
| XR_106168         | A930006D01Rik | 1.993                                        |
| AK144790          | Gxylt2        | 1.989                                        |
| NM_008007         | Fgf3          | 1.988                                        |
| NM_009662         | Alox5         | 1.978                                        |
| NM_008308         | Htr1a         | 1.978                                        |
| NM_007860         | Dio1          | 1.966                                        |
| NR_003649         | Gm5434        | 1.955                                        |
| NM_011892         | Sgcg          | 1.951                                        |
| NM_001101510      | Susd5         | 1.948                                        |
| BC151047          | Auts2         | 1.936                                        |
| NM_033614         | Pde6c         | 1.924                                        |
| NM_008103         | Gcm1          | 1.920                                        |
| AK013575          | Lias          | 1.895                                        |
| NM_010917         | Nid1          | 1.886                                        |

| Genbank Accession | GeneSymbol    | Fold change<br>(TiO <sub>2</sub> -H vs Sham) |
|-------------------|---------------|----------------------------------------------|
| NM_001163145      | 1810041L15Rik | 1.884                                        |
| NM_001111143      | Cym           | 1.880                                        |
| AK080905          | Pten          | 1.876                                        |
| NM_138584         | Spg21         | 1.875                                        |
| NM_010707         | Lgals6        | 1.869                                        |
| NM_001145978      | Parp4         | 1.865                                        |
| NM_010275         | Gdnf          | 1.849                                        |
| AK173011          | Sacs          | 1.845                                        |
| NM_013489         | Cd84          | 1.843                                        |
| AK020539          | 9530003O04Rik | 1.842                                        |
| NM_199446         | Phkb          | 1.839                                        |
| NM_146878         | Olf30         | 1.838                                        |
| BC045142          | Kenq1         | 1.838                                        |
| NR_040758         | 0610040F04Rik | 1.835                                        |
| AK041660          | D5ErtD798e    | 1.826                                        |
| NM_001205236      | Arhgap27      | 1.825                                        |
| NM_183151         | Mid1          | 1.825                                        |
| NM_054066         | Plcz1         | 1.824                                        |
| NM_001146080      | Cntfr         | 1.816                                        |
| NM_174846         | Glyctk        | 1.811                                        |
| NM_178738         | Prss35        | 1.810                                        |
| NM_010620         | Kif15         | 1.808                                        |
| NM_146136         | Slc16a4       | 1.806                                        |
| NM_001033380      | Itpril2       | 1.801                                        |
| AK031795          | BB070754      | 1.800                                        |
| AK047130          | B930025B16Rik | 1.799                                        |
| AK005011          | Proz          | 1.799                                        |
| NM_023842         | Dsp           | 1.799                                        |
| NM_001113368      | Ceacam2       | 1.795                                        |
| AA871626          | Defa1         | 1.790                                        |
| NM_021022         | Abcb11        | 1.776                                        |
| NM_009863         | Cdc7          | 1.764                                        |
| NR_015553         | 9430076C15Rik | 1.763                                        |
| NM_001033208      | Myzap         | 1.762                                        |
| NM_028053         | Tmem38b       | 1.761                                        |
| NM_133207         | Kcnh7         | 1.761                                        |
| NM_029281         | Zfp820        | 1.758                                        |
| NM_011347         | Selp          | 1.756                                        |
| NM_021050         | Cftr          | 1.754                                        |
| AF396877          | Dst           | 1.754                                        |
| NM_029416         | Klf17         | 1.752                                        |
| NM_001081160      | Mdga1         | 1.750                                        |
| AK036139          | 9630039A02Rik | 1.742                                        |
| NR_040273         | 9330179D12Rik | 1.742                                        |
| NM_019684         | Srpk3         | 1.733                                        |
| AK003710          | 1110014L15Rik | 1.731                                        |
| NM_007823         | Cyp4b1        | 1.727                                        |
| NM_001033158      | Rasl12        | 1.725                                        |
| NM_008664         | Myom2         | 1.720                                        |
| NM_009380         | Thrb          | 1.711                                        |
| NM_001039169      | Eif4e2        | 1.697                                        |
| NM_001033411      | Gm826         | 1.696                                        |
| NM_145969         | Fam116a       | 1.689                                        |
| NM_177346         | Gpr149        | 1.688                                        |

| Genbank Accession | GeneSymbol    | Fold change<br>(TiO <sub>2</sub> -H vs Sham) |
|-------------------|---------------|----------------------------------------------|
| NM_029733         | 2010005H15Rik | 1.686                                        |
| NM_001037928      | Gm11992       | 1.685                                        |
| NM_027411         | Ccdc99        | 1.685                                        |
| NM_177628         | Fam167a       | 1.684                                        |
| NM_178407         | Arap2         | 1.681                                        |
| NM_031258         | Chrd11        | 1.681                                        |
| NM_027979         | Chit1         | 1.678                                        |
| NM_001001807      | Olf279        | 1.677                                        |
| NM_023224         | Cblc          | 1.677                                        |
| XR_142217         | Gm9519        | 1.675                                        |
| NM_175539         | Dcaf12l2      | 1.674                                        |
| NM_001159507      | Grip2         | 1.672                                        |
| NM_015820         | Hs6st3        | 1.671                                        |
| NM_001077514      | Slc1a2        | 1.670                                        |
| NM_001037916      | Ccdc17        | 1.661                                        |
| AK046043          | Apol8         | 1.660                                        |
| XR_105888         | 1700022N22Rik | 1.660                                        |
| NM_010675         | Krtap8-1      | 1.659                                        |
| NM_026922         | Atp2c2        | 1.659                                        |
| NM_011860         | Nlrp5         | 1.651                                        |
| NM_013500         | Hapln1        | 1.649                                        |
| AK036290          | AU015680      | 1.646                                        |
| NM_029324         | 1700018C11Rik | 1.644                                        |
| NM_207228         | Tsga10        | 1.637                                        |
| NR_040418         | 2310034G01Rik | 1.631                                        |
| AK047818          | A730009E18Rik | 1.630                                        |
| AK132983          | Sh3rf3        | 1.622                                        |
| NM_145581         | Siglec5       | 1.621                                        |
| AK082713          | C230094B09Rik | 1.621                                        |
| NM_173869         | Stfa2l1       | 1.619                                        |
| NM_175418         | Mybpc1        | 1.611                                        |
| NM_027613         | Mmm1          | 1.610                                        |
| NM_026222         | Ccdc39        | 1.598                                        |
| AK045009          | B130019D13Rik | 1.595                                        |
| NM_001081399      | Prss33        | 1.593                                        |
| NM_001025156      | Ccdc93        | 1.591                                        |
| NM_007876         | Dpep1         | 1.590                                        |
| AK014289          | Rbm33         | 1.588                                        |
| NR_033566         | AI507597      | 1.577                                        |
| NM_172508         | Dse           | 1.574                                        |
| NM_030560         | Cwc22         | 1.568                                        |
| BC042707          | Prok1         | 1.566                                        |
| NM_001037752      | Defb45        | 1.558                                        |
| XR_142034         | LOC100862636  | 1.557                                        |
| NM_029112         | Morn3         | 1.557                                        |
| AK049583          | Mfn2          | 1.549                                        |
| NM_177261         | Kndc1         | 1.549                                        |
| NM_016907         | Spint1        | 1.549                                        |
| XR_140816         | Gm9653        | 1.546                                        |
| NM_011681         | Scgbla1       | 1.542                                        |
| NM_181071         | Tanc2         | 1.542                                        |
| NM_146198         | Slc5a11       | 1.540                                        |
| NM_001177951      | Rpgr          | 1.533                                        |
| NM_029714         | Catsperg2     | 1.532                                        |

| Genbank Accession | GeneSymbol    | Fold change<br>(TiO <sub>2</sub> -H vs Sham) |
|-------------------|---------------|----------------------------------------------|
| NM_008184         | Gstm6         | 1.525                                        |
| NM_027706         | Nbas          | 1.525                                        |
| AK035028          | Fat3          | 1.521                                        |
| NM_009809         | Casp14        | 1.520                                        |
| NM_029025         | Tmem81        | 1.516                                        |
| NM_001042611      | Cp            | 1.515                                        |
| NM_133365         | Dnahe5        | 1.509                                        |
| NR_045120         | Gm18756       | 1.501                                        |
| NM_019809         | Pdlim5        | 1.500                                        |
| NM_028473         | 3110079O15Rik | 1.500                                        |

**(B)**

| Genbank Accession | GeneSymbol    | Fold change<br>(TiO <sub>2</sub> -H vs Sham) | Genbank Accession | GeneSymbol    | Fold change<br>(TiO <sub>2</sub> -H vs Sham) |
|-------------------|---------------|----------------------------------------------|-------------------|---------------|----------------------------------------------|
| NM_029374         | Sept12        | 0.005                                        | NR_045168         | 4930447N08Rik | 0.042                                        |
| NM_027668         | 4933412E24Rik | 0.006                                        | XM_003689102      | LOC100862025  | 0.042                                        |
| NM_011407         | Slfn1         | 0.007                                        | BF788177          | AA408650      | 0.044                                        |
| NM_029228         | 4930564D02Rik | 0.007                                        | NM_011037         | Pax2          | 0.044                                        |
| AK046115          | A930016O22Rik | 0.008                                        | NM_146355         | Olf692        | 0.044                                        |
| NM_147032         | Olf705        | 0.008                                        | NM_198666         | Gm9758        | 0.044                                        |
| NM_178715         | Tmem30b       | 0.009                                        | NM_028671         | Fam122c       | 0.045                                        |
| AK015387          | 4930445B16Rik | 0.009                                        | NM_031164         | F13b          | 0.045                                        |
| AK036917          | Gm9902        | 0.009                                        | NM_010340         | Gpr50         | 0.045                                        |
| NR_036452         | E230016K23Rik | 0.009                                        | NM_134163         | Mbnl3         | 0.045                                        |
| NM_009618         | Adam2         | 0.009                                        | NM_001163625      | Sult6b1       | 0.046                                        |
| NM_030712         | Cxcr6         | 0.010                                        | NM_001103157      | Steap2        | 0.047                                        |
| NM_197944         | Hsh2d         | 0.011                                        | NM_001164289      | Gm6907        | 0.047                                        |
| NM_026090         | Iqcf4         | 0.012                                        | AK135955          | Gm3772        | 0.048                                        |
| NM_009973         | Csn1s2b       | 0.012                                        | NM_008780         | Pax1          | 0.048                                        |
| NM_026132         | Txndc8        | 0.013                                        | AK011813          | Slc16a10      | 0.049                                        |
| NM_001039047      | Trim58        | 0.014                                        | NM_007815         | Cyp2c29       | 0.050                                        |
| XR_140973         | Gm10824       | 0.014                                        | NR_001570         | Xist          | 0.050                                        |
| BU554875          | 2010001M06Rik | 0.014                                        | NM_001128151      | Cecr2         | 0.053                                        |
| NM_001002897      | Atg9b         | 0.014                                        | NM_001161855      | 4933416C03Rik | 0.055                                        |
| NM_008232         | Hdgfl1        | 0.015                                        | NM_022322         | Tnmd          | 0.058                                        |
| AK016784          | 4933412A08Rik | 0.016                                        | AK040172          | Abhd15        | 0.058                                        |
| NM_001039701      | Il1rn         | 0.017                                        | NM_147055         | Olf649        | 0.058                                        |
| AK051714          | Thsd7b        | 0.017                                        | NM_001163550      | 1700016H13Rik | 0.059                                        |
| AF011426          | Vmn2r10       | 0.018                                        | NM_032007         | Mmp1b         | 0.059                                        |
| AK014730          | 4833419O12Rik | 0.019                                        | NM_053227         | Vmn1r44       | 0.060                                        |
| NM_001199840      | Olf1354       | 0.020                                        | NM_001081137      | Sis           | 0.060                                        |
| XM_003689282      | Fam81b        | 0.021                                        | NM_019461         | Usp27x        | 0.061                                        |
| NM_177369         | Myh8          | 0.022                                        | NM_026822         | Lce1b         | 0.061                                        |
| CA495423          | Gm15417       | 0.022                                        | NM_011465         | Spna1         | 0.064                                        |
| NM_001003670      | Gm5414        | 0.024                                        | NM_001177482      | Gm14851       | 0.065                                        |
| NM_001038697      | Gm5635        | 0.024                                        | NM_013793         | Klra15        | 0.065                                        |
| NM_001045543      | Gm11435       | 0.024                                        | NM_001105160      | Cyp3a59       | 0.065                                        |
| NM_030219         | Trim42        | 0.025                                        | AK143744          | Gm10779       | 0.065                                        |
| NR_033214         | B430212C06Rik | 0.026                                        | AK053725          | Tcp11         | 0.066                                        |
| AW493399          | 9330109K16Rik | 0.026                                        | XM_001472786      | 1700120B22Rik | 0.066                                        |
| NM_001005780      | Olf255        | 0.028                                        | NM_001005568      | Olf1281       | 0.066                                        |
| NM_001174099      | Krt36         | 0.028                                        | NM_008206         | H2-Oa         | 0.066                                        |
| NM_011110         | Pla2g5        | 0.030                                        | AK033078          | Dleu2         | 0.066                                        |
| NM_134203         | Vmn1r73       | 0.030                                        | NM_175350         | Tmem146       | 0.067                                        |
| NM_026419         | Cela3b        | 0.032                                        | NM_147052         | Olf589        | 0.067                                        |
| AK076769          | Gm3509        | 0.032                                        | NM_001009950      | Slc38a8       | 0.068                                        |
| NR_040539         | 2410007B07Rik | 0.033                                        | AI595487          | AA060545      | 0.069                                        |
| NR_045920         | 4933404G15Rik | 0.034                                        | NM_001100185      | Cyp4a30b-ps   | 0.069                                        |
| NM_178674         | Fbxl21        | 0.034                                        | AK052948          | D930001M23Rik | 0.069                                        |
| NR_004853         | Cdk3-ps       | 0.035                                        | NM_001033290      | Gpr55         | 0.070                                        |
| NM_028708         | Jakmip3       | 0.036                                        | NM_146630         | Olf123        | 0.073                                        |
| AK164319          | Foxp2         | 0.037                                        | NM_146456         | Olf92         | 0.074                                        |
| NM_001033332      | Tmtc3         | 0.038                                        | NM_026594         | Rpl39l        | 0.074                                        |
| NM_207243         | Muc19         | 0.039                                        | NM_007718         | Ccr11l        | 0.074                                        |
| NM_007704         | Inadl         | 0.040                                        | NM_019759         | Dpt           | 0.074                                        |
| NM_207249         | Olf684        | 0.041                                        | NM_001145660      | Rfx8          | 0.074                                        |
| AF223416          | Trdn          | 0.042                                        | NM_172155         | Prl3d2        | 0.076                                        |

| Genbank Accession | GeneSymbol    | Fold change<br>(TiO <sub>2</sub> -H vs Sham) |
|-------------------|---------------|----------------------------------------------|
| NM_008192         | Gucy2e        | 0.077                                        |
| NM_139222         | Defb15        | 0.078                                        |
| NM_175456         | Abra          | 0.079                                        |
| NM_010094         | Lefty1        | 0.079                                        |
| NM_001039556      | Rad54b        | 0.081                                        |
| XM_001475533      | Olf687        | 0.081                                        |
| AK145592          | Gm10204       | 0.082                                        |
| NM_001100461      | Pnma5         | 0.082                                        |
| NM_146007         | Col6a2        | 0.082                                        |
| NM_027126         | Hfe2          | 0.084                                        |
| NM_009877         | Cdkn2a        | 0.084                                        |
| BC048590          | Cep120        | 0.084                                        |
| NM_027210         | Ceacam13      | 0.084                                        |
| AK147870          | LOC627096     | 0.086                                        |
| NM_139223         | Defb13        | 0.088                                        |
| NM_001039114      | Acsbg2        | 0.091                                        |
| NM_001252070      | Dnahc7a       | 0.092                                        |
| NM_017390         | Svs2          | 0.094                                        |
| NM_146803         | Olf906        | 0.095                                        |
| NM_028557         | Mbd311        | 0.095                                        |
| AK054255          | Pxdn          | 0.097                                        |
| AK016655          | 4933404M09Rik | 0.098                                        |
| U89377            | Nnmt          | 0.098                                        |
| NM_009019         | Rag1          | 0.100                                        |
| NM_172851         | Cntnap5b      | 0.100                                        |
| NM_147005         | Olf395        | 0.100                                        |
| NM_153588         | Mkl2          | 0.100                                        |
| NM_177230         | Ccdc158       | 0.101                                        |
| AK020766          | A430105D02Rik | 0.101                                        |
| NM_008493         | Lep           | 0.101                                        |
| NM_022314         | Tpm3          | 0.102                                        |
| NM_028790         | Acot12        | 0.103                                        |
| NM_001126487      | Heatr8        | 0.104                                        |
| NM_009331         | Tcf7          | 0.104                                        |
| NM_007710         | Ckm           | 0.104                                        |
| NM_001081668      | Nup62cl       | 0.105                                        |
| NM_027828         | Fam110c       | 0.105                                        |
| NM_001166636      | Gm4312        | 0.106                                        |
| NM_001173550      | C5ar1         | 0.106                                        |
| NM_011709         | Wap           | 0.106                                        |
| NM_001013832      | Gpr31b        | 0.106                                        |
| NM_178886         | Ldlrad3       | 0.107                                        |
| NM_010944         | Musk          | 0.107                                        |
| XM_003086710      | Gm3952        | 0.107                                        |
| NM_008152         | Gpr65         | 0.109                                        |
| NM_130856         | Krtap16-8     | 0.110                                        |
| NM_001166631      | Havcr1        | 0.110                                        |
| AK018320          | 6530403M18Rik | 0.111                                        |
| NM_001013774      | Kpna7         | 0.112                                        |
| NM_153072         | Hus1b         | 0.114                                        |
| NR_045798         | 1810034E14Rik | 0.114                                        |
| NM_177709         | Tusc5         | 0.115                                        |
| AK139699          | B020011L13Rik | 0.116                                        |
| NM_177083         | B430306N03Rik | 0.116                                        |

| Genbank Accession | GeneSymbol    | Fold change<br>(TiO <sub>2</sub> -H vs Sham) |
|-------------------|---------------|----------------------------------------------|
| NM_001033455      | Ccdc27        | 0.118                                        |
| AK016366          | 4930588G17Rik | 0.120                                        |
| AK041677          | Gm9502        | 0.120                                        |
| NM_001164171      | Myh6          | 0.121                                        |
| NM_001033430      | Jhdm1d        | 0.122                                        |
| NM_177779         | Ccdc42        | 0.122                                        |
| NM_022563         | Ddr2          | 0.122                                        |
| AK076724          | Gm9789        | 0.122                                        |
| NM_146738         | Olf497        | 0.123                                        |
| BG075595          | AW556556      | 0.123                                        |
| NM_009493         | Vmn2r42       | 0.124                                        |
| NM_175501         | Adamts12      | 0.124                                        |
| AK012661          | Dnahc17       | 0.124                                        |
| NM_027651         | Tmem30c       | 0.124                                        |
| NM_001101531      | Gm5538        | 0.125                                        |
| NR_045179         | Gm8633        | 0.126                                        |
| NM_145375         | Tm6sf1        | 0.126                                        |
| BG069373          | D19Ert744e    | 0.126                                        |
| AK139339          | Spata21       | 0.126                                        |
| NM_173861         | Csnka2ip      | 0.127                                        |
| NM_010984         | Olf263        | 0.128                                        |
| NM_001033333      | Gm239         | 0.129                                        |
| AK077177          | Bmp2k         | 0.129                                        |
| NM_053165         | Clec2h        | 0.129                                        |
| NM_175651         | Cnpy1         | 0.130                                        |
| NM_009265         | Sprr1b        | 0.130                                        |
| NM_023635         | Rab27a        | 0.130                                        |
| HQ713438          | Clec2g        | 0.132                                        |
| NM_001011813      | Olf93         | 0.132                                        |
| NM_206867         | Gm13280       | 0.133                                        |
| NM_198636         | Acss3         | 0.133                                        |
| NM_018789         | Foxo4         | 0.134                                        |
| NM_001162928      | Pom12112      | 0.142                                        |
| NM_007760         | Crat          | 0.144                                        |
| NM_008936         | Prop1         | 0.144                                        |
| NR_033493         | Gm10818       | 0.147                                        |
| NM_001003939      | BC030307      | 0.149                                        |
| XM_619430         | 4930488N24Rik | 0.150                                        |
| NR_040694         | 4930413E15Rik | 0.150                                        |
| NM_001034904      | Gm5891        | 0.151                                        |
| NM_024445         | Tsnaxip1      | 0.152                                        |
| NM_001037712      | Kcnh6         | 0.153                                        |
| NM_010821         | Mpeg1         | 0.154                                        |
| AK029744          | Agbl2         | 0.156                                        |
| NM_001081063      | Prss55        | 0.157                                        |
| NM_001102579      | Vmn2r67       | 0.158                                        |
| AK087205          | 9530082P21Rik | 0.159                                        |
| NM_009350         | Adad1         | 0.159                                        |
| XM_003085258      | Pabpc112b-ps  | 0.163                                        |
| NM_134199         | Vmn1r235      | 0.165                                        |
| NM_134037         | Acly          | 0.166                                        |
| NM_177638         | Crb3          | 0.167                                        |
| NM_011201         | Ptpn1         | 0.168                                        |
| NM_194335         | Naif1         | 0.172                                        |

| Genbank Accession | GeneSymbol    | Fold change<br>(TiO <sub>2</sub> -H vs Sham) |
|-------------------|---------------|----------------------------------------------|
| NM_008673         | Nat1          | 0.173                                        |
| NM_001166501      | Dennd1b       | 0.181                                        |
| NM_001105055      | Vmn2r58       | 0.183                                        |
| NM_033042         | Tnfrsf25      | 0.183                                        |
| NM_024406         | Fabp4         | 0.186                                        |
| NM_007751         | Cox8b         | 0.186                                        |
| NM_181683         | Defb37        | 0.189                                        |
| XM_003084673      | LOC100503615  | 0.191                                        |
| NM_010548         | Il10          | 0.205                                        |
| NM_146953         | Olf1531       | 0.206                                        |
| NM_001177438      | Aldh3b2       | 0.209                                        |
| NM_027754         | Rnf148        | 0.211                                        |
| AK038979          | Ints9         | 0.216                                        |
| NM_177921         | E230019M04Rik | 0.217                                        |
| AK016828          | 4933416A02Rik | 0.219                                        |
| AK138162          | 1700101I11Rik | 0.221                                        |
| NR_024323         | 4930426L09Rik | 0.221                                        |
| NM_017395         | Rfx5          | 0.222                                        |
| BY707381          | 1700125G22Rik | 0.223                                        |
| AK163481          | Kdm5b         | 0.227                                        |
| NM_207031         | Ano7          | 0.228                                        |
| NM_010505         | Ifna5         | 0.237                                        |
| NM_001045525      | Cyb5d1        | 0.238                                        |
| NM_146020         | Gltpd2        | 0.238                                        |
| NM_030141         | 1700061G19Rik | 0.239                                        |
| NM_007753         | Cpa3          | 0.240                                        |
| NM_001033493      | Gpr111        | 0.241                                        |
| NM_009202         | Slc22a1       | 0.243                                        |
| NM_198424         | Orai3         | 0.244                                        |
| NM_013599         | Mmp9          | 0.244                                        |
| AK019978          | Auh           | 0.247                                        |
| NM_172501         | Nhlrc3        | 0.250                                        |
| AK009512          | 2310026L22Rik | 0.254                                        |
| NM_001167581      | Gsdmcl1       | 0.259                                        |
| NM_001161355      | Timd2         | 0.263                                        |
| NM_001085440      | Smcr8         | 0.265                                        |
| NM_206536         | AB124611      | 0.266                                        |
| NM_206823         | Olf153        | 0.270                                        |
| NM_010696         | Lcp2          | 0.271                                        |
| NM_001195413      | Cngb1         | 0.274                                        |
| NM_001080931      | Med13         | 0.276                                        |
| NM_144795         | Pycr1         | 0.277                                        |
| NM_008290         | Hsd17b2       | 0.282                                        |
| AK168315          | Dnttip1       | 0.282                                        |
| NM_147222         | Rdh19         | 0.284                                        |
| NM_001122953      | Nfia          | 0.285                                        |
| NM_153576         | Cxcl17        | 0.286                                        |
| NM_007758         | Cr2           | 0.287                                        |
| NM_010874         | Nat2          | 0.290                                        |
| NM_029604         | 1700027A23Rik | 0.292                                        |
| NR_038039         | 1700023F02Rik | 0.302                                        |
| NM_001045484      | Mef2b         | 0.303                                        |
| AK039088          | Prkx          | 0.303                                        |
| NM_147217         | Gprc5c        | 0.306                                        |

| Genbank Accession | GeneSymbol    | Fold change<br>(TiO <sub>2</sub> -H vs Sham) |
|-------------------|---------------|----------------------------------------------|
| NM_001039198      | Zfhx2         | 0.307                                        |
| AK140648          | Ptprz1        | 0.308                                        |
| DV065341          | 2810427A07Rik | 0.310                                        |
| NM_009463         | Ucp1          | 0.312                                        |
| NM_146805         | Olf1907       | 0.314                                        |
| NM_138945         | Pou4f3        | 0.320                                        |
| NM_013684         | Tbp           | 0.320                                        |
| NM_009866         | Cdh11         | 0.322                                        |
| AK047423          | Odz1          | 0.324                                        |
| NM_001164682      | Mpp4          | 0.327                                        |
| NM_021365         | Xlr4b         | 0.329                                        |
| NM_001035531      | Adrbk2        | 0.334                                        |
| NM_008121         | Gja5          | 0.336                                        |
| AK045208          | 5730590G19Rik | 0.348                                        |
| NM_145840         | Rgs9bp        | 0.353                                        |
| NM_026422         | Mrrf          | 0.355                                        |
| NM_011838         | Lynx1         | 0.359                                        |
| NM_001139519      | Zbp1          | 0.359                                        |
| NM_007401         | Adam5         | 0.360                                        |
| NM_026563         | Sdccag3       | 0.361                                        |
| NM_019662         | Rrad          | 0.363                                        |
| NM_146749         | Olf1875       | 0.365                                        |
| XR_106015         | Gm3916        | 0.366                                        |
| AK016158          | 4930557B15Rik | 0.367                                        |
| NM_010113         | Egf           | 0.368                                        |
| NM_001111079      | Uhrf1         | 0.368                                        |
| NM_010468         | Hoxd3         | 0.372                                        |
| NM_009422         | Traf2         | 0.372                                        |
| NR_003248         | Foxl2os       | 0.373                                        |
| NM_015821         | Fbxl8         | 0.374                                        |
| NM_010196         | Fga           | 0.375                                        |
| NM_177208         | Dopey1        | 0.378                                        |
| AK041990          | Ccdc64        | 0.379                                        |
| NM_019921         | Akap10        | 0.383                                        |
| NM_054103         | Stk33         | 0.388                                        |
| NM_015809         | Krtap5-4      | 0.391                                        |
| NM_001081278      | Tbc1d4        | 0.394                                        |
| NM_027040         | 1700007K13Rik | 0.394                                        |
| NM_028751         | Tjap1         | 0.399                                        |
| AI662168          | AI662168      | 0.402                                        |
| AK078618          | 7330403C04Rik | 0.404                                        |
| NR_040511         | 9230102O04Rik | 0.406                                        |
| NM_017372         | Lyz2          | 0.410                                        |
| NM_019459         | Nphs1         | 0.414                                        |
| AK081075          | Pla2g3        | 0.414                                        |
| NM_001123362      | Prdm12        | 0.420                                        |
| NM_026596         | 4930591A17Rik | 0.421                                        |
| NM_029197         | 4930528F23Rik | 0.426                                        |
| NM_011517         | Sycp3         | 0.427                                        |
| AK077474          | 4930579K19Rik | 0.429                                        |
| AK038838          | Ralgapa2      | 0.430                                        |
| NM_001034102      | Gm5800        | 0.434                                        |
| NM_027816         | Cyp2u1        | 0.436                                        |
| NM_007392         | Acta2         | 0.436                                        |

| Genbank Accession | GeneSymbol    | Fold change<br>(TiO <sub>2</sub> -H vs Sham) |
|-------------------|---------------|----------------------------------------------|
| NM_001011760      | Olfir314      | 0.437                                        |
| XR_140758         | Gm10091       | 0.438                                        |
| NM_010445         | Hmx1          | 0.441                                        |
| NM_178260         | Kiss1         | 0.442                                        |
| NR_038059         | 1700110I01Rik | 0.442                                        |
| NM_023061         | Mcarn         | 0.444                                        |
| NM_023304         | Fgf22         | 0.445                                        |
| NM_028608         | Glpr1         | 0.448                                        |
| NM_175441         | Mylk3         | 0.449                                        |
| NM_183276         | Nbeal2        | 0.451                                        |
| NM_153136         | Nudt18        | 0.452                                        |
| NM_001102405      | Acp5          | 0.455                                        |
| NM_001081234      | Pigg          | 0.458                                        |
| NM_008149         | Gpam          | 0.459                                        |
| NM_172826         | Dact2         | 0.463                                        |
| NM_001164569      | Rfl1          | 0.475                                        |
| NM_001039485      | Fam38b        | 0.478                                        |
| NM_144491         | Dph1          | 0.479                                        |
| NM_011432         | Snrpc         | 0.482                                        |
| NM_146567         | Olfir843      | 0.484                                        |
| XM_001471750      | Exoc3l2       | 0.485                                        |
| NM_001033769      | B020031M17Rik | 0.485                                        |
| NM_010777         | Mbp           | 0.485                                        |
| NR_033221         | BC031361      | 0.485                                        |
| NM_175397         | Sp110         | 0.487                                        |
| NM_173770         | Fam69c        | 0.491                                        |
| NM_024438         | Dusp19        | 0.493                                        |
| NM_022434         | Cyp4f14       | 0.493                                        |
| NM_027018         | Glpr1l1       | 0.494                                        |
| NM_001082547      | Gm5483        | 0.494                                        |
| NM_172564         | Tns4          | 0.495                                        |
| NM_013524         | Fut7          | 0.495                                        |
| NM_029252         | 4930563D23Rik | 0.496                                        |
| NM_008034         | Folr1         | 0.500                                        |
| NM_145703         | Kcnip2        | 0.500                                        |
| NM_028483         | Cib4          | 0.500                                        |
| NM_021319         | Pglyrp2       | 0.500                                        |
| NM_001163614      | Ascl4         | 0.514                                        |
| NM_015783         | Isg15         | 0.518                                        |
| NM_008358         | Il15ra        | 0.518                                        |
| NM_007555         | Bmp5          | 0.523                                        |
| NM_172418         | Mamstr        | 0.525                                        |
| C78535            | D7Ert183e     | 0.531                                        |
| NM_019732         | Runx3         | 0.531                                        |
| NM_008829         | Pgr           | 0.536                                        |
| NM_177765         | Ttll13        | 0.540                                        |
| NM_009681         | Ap3s1         | 0.541                                        |
| NM_001039220      | AI429214      | 0.544                                        |
| NM_010706         | Lgals4        | 0.547                                        |
| NR_040619         | A930019D19Rik | 0.549                                        |
| NM_001029937      | Sec14l3       | 0.564                                        |
| NM_021274         | Cxcl10        | 0.565                                        |
| NR_045061         | 4921525O09Rik | 0.568                                        |
| NM_001013607      | Vmol          | 0.572                                        |

| Genbank Accession | GeneSymbol    | Fold change<br>(TiO <sub>2</sub> -H vs Sham) |
|-------------------|---------------|----------------------------------------------|
| NM_001163611      | Nps           | 0.573                                        |
| NM_011582         | Thbs4         | 0.576                                        |
| NM_029107         | 4930417G10Rik | 0.580                                        |
| NM_017370         | Hp            | 0.580                                        |
| NM_177200         | Svopl         | 0.581                                        |
| NM_133193         | Il1rl2        | 0.581                                        |
| NM_013731         | Sgk2          | 0.583                                        |
| NM_001039555      | Cyp2c68       | 0.584                                        |
| AK014919          | Cenpp         | 0.588                                        |
| NM_001252569      | Serpina1a     | 0.599                                        |
| AK036480          | Disp2         | 0.607                                        |
| NR_045392         | Gm10731       | 0.620                                        |
| NR_045080         | 3300005D01Rik | 0.621                                        |
| NM_001102414      | Slc2a9        | 0.622                                        |
| NM_153510         | Pilra         | 0.622                                        |
| AK015366          | 4930442P07Rik | 0.628                                        |
| NM_018809         | Ptfla         | 0.631                                        |
| AK170207          | Zfp740        | 0.635                                        |
| NM_009948         | Cpt1b         | 0.637                                        |
| NM_001037918      | Lipt1         | 0.639                                        |
| NM_011333         | Ccl2          | 0.641                                        |
| NM_170727         | Scgb3a1       | 0.645                                        |
| NM_144906         | Sgip1         | 0.647                                        |
| AK016268          | 4930571B16Rik | 0.650                                        |
| NM_001037822      | Krtap5-5      | 0.652                                        |
| NM_007691         | Chek1         | 0.653                                        |
| AK090034          | Gm3161        | 0.653                                        |
| NM_008631         | Mt4           | 0.656                                        |
| XM_003086124      | Ms4a4a        | 0.660                                        |
| NM_001204233      | Spp1          | 0.662                                        |
| NM_007775         | Crygc         | 0.663                                        |
| XR_105456         | Gm4419        | 0.663                                        |
| NM_001174107      | Map3k9        | 0.663                                        |
