# Supplementary material for: Effects of Prenatal Exposure to Titanium Dioxide Nanoparticles on DNA Methylation and Gene Expression Profile in the Mouse Brain
Source: PubMed Central journal article supplement (PMC8915839; doi:10.3389/ftox.2021.705910), 2021-10-08
Supplement: Table12.pdf [file Table12.pdf]

**Supplementary Table 12.****GO terms enriched in the genes that showed differential expression accompanied by altered DNA methylation commonly in male (M) and female (F) offspring in the TiO<sub>2</sub>-H group.**

| ID         | GO term                                              | Sex | Enrichment factor | p-value |
|------------|------------------------------------------------------|-----|-------------------|---------|
| GO:0003779 | actin binding                                        | M   | 3.28              | 0.019   |
|            |                                                      | F   | 2.73              | 0.037   |
| GO:0008285 | negative regulation of cell population proliferation | M   | 3.07              | 0.024   |
|            |                                                      | F   | 3.58              | 0.004   |
| GO:0007275 | multicellular organism development                   | M   | 2.63              | 0.002   |
|            |                                                      | F   | 3.48              | < 0.001 |
| GO:0003700 | DNA-binding transcription factor activity            | M   | 2.63              | 0.018   |
|            |                                                      | F   | 5.01              | < 0.001 |
| GO:0043565 | sequence-specific DNA binding                        | M   | 2.50              | 0.033   |
|            |                                                      | F   | 4.17              | < 0.001 |
| GO:0030054 | cell junction                                        | M   | 2.42              | 0.012   |
|            |                                                      | F   | 2.24              | 0.014   |
| GO:0006355 | regulation of transcription, DNA-templated           | M   | 2.34              | 0.011   |
|            |                                                      | F   | 3.31              | < 0.001 |
